# Supplementary material
Source: PubMed Central journal article supplement (PMC2889637)
Supplement: 00552.2009_1.pdf [file 00552.2009_1.pdf]

**Supplementary Table S1. All proteins detected in EGFP+ cells from the kidney.**

| Protein Name                                                                     | Gene Name | Accession No | Mw (kDa) | Peptide Count | GO Component                                                                                                                                                                                                                         | GO Function                                                                                                                                                                                                                                                                                                                                                                                                                                                                                      | GO Process                                                                                                                                                                                                                                                                                                                                                                                                                                                                      |
|----------------------------------------------------------------------------------|-----------|--------------|----------|---------------|--------------------------------------------------------------------------------------------------------------------------------------------------------------------------------------------------------------------------------------|--------------------------------------------------------------------------------------------------------------------------------------------------------------------------------------------------------------------------------------------------------------------------------------------------------------------------------------------------------------------------------------------------------------------------------------------------------------------------------------------------|---------------------------------------------------------------------------------------------------------------------------------------------------------------------------------------------------------------------------------------------------------------------------------------------------------------------------------------------------------------------------------------------------------------------------------------------------------------------------------|
| Na <sup>+</sup> /K <sup>+</sup> -ATPase alpha 1 subunit                          | Atp1a1    | NP_659149    | 113      | 1172          | basolateral plasma membrane, integral to membrane, membrane, microsome, plasma membrane, sarcolemma                                                                                                                                  | 4-nitrophenylphosphatase activity, ATP binding, ATPase activity, coupled to transmembrane movement of ions, phosphorylative mechanism, catalytic activity, hydrolase activity, acting on acid anhydrides, catalyzing transmembrane movement of substances, magnesium ion binding, metal ion binding, monovalent inorganic cation transmembrane transporter activity, nucleotide binding, potassium ion binding, protein binding, sodium ion binding, sodium:potassium-exchanging ATPase activity | ATP biosynthetic process, cation transport, ion transport, metabolic process, monovalent inorganic cation transport, negative regulation of glucocorticoid biosynthetic process, negative regulation of heart contraction, positive regulation of heart contraction, positive regulation of striated muscle contraction, potassium ion transport, regulation of blood pressure, regulation of the force of heart contraction, response to drug, sodium ion transport, transport |
| aconitase 2, mitochondrial                                                       | Aco2      | NP_542364    | 85       | 998           | mitochondrion                                                                                                                                                                                                                        | 4 iron, 4 sulfur cluster binding, aconitate hydratase activity, iron ion binding, iron-sulfur cluster binding, lyase activity, metal ion binding                                                                                                                                                                                                                                                                                                                                                 | citrate metabolic process, metabolic process, tricarboxylic acid cycle                                                                                                                                                                                                                                                                                                                                                                                                          |
| ATP synthase, H <sup>+</sup> transporting mitochondrial F1 complex, beta subunit | Atp5b     | NP_058054    | 56       | 804           | membrane, mitochondrial inner membrane, mitochondrion, proton-transporting ATP synthase complex, catalytic core F(1), proton transporting two-sector ATPase complex, proton-transporting two-sector ATPase complex, catalytic domain | ATP binding, hydrogen ion transporting ATP synthase activity, rotational mechanism, hydrogen-exporting ATPase activity, phosphorylative mechanism, hydrolase activity, acting on acid anhydrides, catalyzing transmembrane movement of substances, nucleoside-triphosphatase activity, nucleotide binding, proton-transporting ATPase activity, rotational mechanism                                                                                                                             | ATP biosynthetic process, ATP metabolic process, ATP synthesis coupled proton transport, ion transport, lipid metabolic process, negative regulation of cell adhesion involved in substrate-bound cell migration, proton transport, transport                                                                                                                                                                                                                                   |

| Protein Name                                                                      | Gene Name | Accession No | Mw (kDa) | Peptide Count | GO Component                                                                                                                                                                                                                         | GO Function                                                                                                                                                                                                                                                                                                                                                                                                                                                                       | GO Process                                                                                                                                                                                                                                                                                                                                                                                                                                                                                                                                                                                                                                                                                                                  |
|-----------------------------------------------------------------------------------|-----------|--------------|----------|---------------|--------------------------------------------------------------------------------------------------------------------------------------------------------------------------------------------------------------------------------------|-----------------------------------------------------------------------------------------------------------------------------------------------------------------------------------------------------------------------------------------------------------------------------------------------------------------------------------------------------------------------------------------------------------------------------------------------------------------------------------|-----------------------------------------------------------------------------------------------------------------------------------------------------------------------------------------------------------------------------------------------------------------------------------------------------------------------------------------------------------------------------------------------------------------------------------------------------------------------------------------------------------------------------------------------------------------------------------------------------------------------------------------------------------------------------------------------------------------------------|
| ATPase, Na+/K+ transporting, alpha 2 polypeptide                                  | Atp1a2    | NP_848492    | 112      | 715           | integral to membrane, membrane, microsome, sarcolemma                                                                                                                                                                                | ATP binding, ATPase activity, coupled to transmembrane movement of ions, phosphorylative mechanism, catalytic activity, hydrolase activity, hydrolase activity, acting on acid anhydrides, catalyzing transmembrane movement of substances, magnesium ion binding, metal ion binding, monovalent inorganic cation transmembrane transporter activity, nucleotide binding, potassium ion binding, protein binding, sodium ion binding, sodium:potassium-exchanging ATPase activity | adult locomotory behavior, ATP biosynthetic process, cation transport, ion transport, locomotion, metabolic process, monovalent inorganic cation transport, negative regulation of heart contraction, negative regulation of striated muscle contraction, neurotransmitter uptake, potassium ion transport, reduction of cytosolic calcium ion concentration, regulation of blood pressure, regulation of muscle contraction, regulation of respiratory gaseous exchange by neurological system process, regulation of smooth muscle contraction, regulation of striated muscle contraction, regulation of the force of heart contraction, regulation of vasoconstriction, sodium ion transport, transport, visual learning |
| actin, alpha 2, smooth muscle, aorta                                              | Acta2     | NP_031418    | 42       | 691           | actin cytoskeleton, cytoplasm, cytoskeleton, smooth muscle contractile fiber                                                                                                                                                         | ATP binding, nucleotide binding, protein binding                                                                                                                                                                                                                                                                                                                                                                                                                                  | regulation of blood pressure, vascular smooth muscle contraction                                                                                                                                                                                                                                                                                                                                                                                                                                                                                                                                                                                                                                                            |
| spectrin alpha 2                                                                  | Spna2     | NP_001070022 | 285      | 673           | cortical cytoskeleton, cytoplasm, cytoskeleton, fascia adherens, membrane, Z disc                                                                                                                                                    | actin binding, calcium ion binding, calmodulin binding                                                                                                                                                                                                                                                                                                                                                                                                                            | actin filament capping                                                                                                                                                                                                                                                                                                                                                                                                                                                                                                                                                                                                                                                                                                      |
| ATP synthase, H+ transporting, mitochondrial F1 complex, alpha subunit, isoform 1 | Atp5a1    | NP_031531    | 60       | 653           | membrane, mitochondrial inner membrane, mitochondrion, proton-transporting ATP synthase complex, catalytic core F(1), proton-transporting two-sector ATPase complex, proton-transporting two-sector ATPase complex, catalytic domain | ATP binding, hydrogen ion transporting ATP synthase activity, rotational mechanism, hydrolase activity, acting on acid anhydrides, catalyzing transmembrane movement of substances, nucleotide binding, proton-transporting ATPase activity, rotational mechanism                                                                                                                                                                                                                 | ATP biosynthetic process, ATP metabolic process, ATP synthesis coupled proton transport, embryonic development, ion transport, lipid metabolic process, proton transport, transport                                                                                                                                                                                                                                                                                                                                                                                                                                                                                                                                         |
| solute carrier family 25, member 5                                                | Slc25a5   | NP_031477    | 33       | 485           | integral to membrane, membrane, mitochondrial inner membrane, mitochondrion                                                                                                                                                          | binding, transporter activity                                                                                                                                                                                                                                                                                                                                                                                                                                                     | transport                                                                                                                                                                                                                                                                                                                                                                                                                                                                                                                                                                                                                                                                                                                   |
| hemoglobin, beta adult major chain                                                | Hbb-b1    | NP_032246    | 16       | 461           | hemoglobin complex                                                                                                                                                                                                                   | heme binding, iron ion binding, metal ion binding, oxygen binding, oxygen transporter activity                                                                                                                                                                                                                                                                                                                                                                                    | hemopoiesis, oxygen transport, regulation of eIF2 alpha phosphorylation by heme, transport                                                                                                                                                                                                                                                                                                                                                                                                                                                                                                                                                                                                                                  |
| spectrin beta 2 isoform 2                                                         | Spnb2     | NP_033286    | 251      | 417           | cortical cytoskeleton, cytoplasm, cytoskeleton, membrane, nucleus, plasma membrane, spectrin                                                                                                                                         | actin binding, calmodulin binding, protein binding, structural constituent of cytoskeleton                                                                                                                                                                                                                                                                                                                                                                                        | actin filament capping, common-partner SMAD protein phosphorylation, SMAD protein nuclear translocation                                                                                                                                                                                                                                                                                                                                                                                                                                                                                                                                                                                                                     |

| Protein Name                                                                  | Gene Name | Accession No | Mw (kDa) | Peptide Count | GO Component                                                                                                                                                                                          | GO Function                                                                                                                                                                                                                                                       | GO Process                                                                                                                                                                                                                                                                                                                                                        |
|-------------------------------------------------------------------------------|-----------|--------------|----------|---------------|-------------------------------------------------------------------------------------------------------------------------------------------------------------------------------------------------------|-------------------------------------------------------------------------------------------------------------------------------------------------------------------------------------------------------------------------------------------------------------------|-------------------------------------------------------------------------------------------------------------------------------------------------------------------------------------------------------------------------------------------------------------------------------------------------------------------------------------------------------------------|
| myosin, heavy polypeptide 9, non-muscle isoform 1                             | Myh9      | NP_071855    | 226      | 394           | cell cortex, cell-cell adherens junction, cortical cytoskeleton, cytoplasm, immunological synapse, myosin complex, neuromuscular junction, plasma membrane, spindle, stress fiber, uropod             | actin binding, actin filament binding, actin-dependent ATPase activity, ADP binding, ATP binding, calmodulin binding, microfilament motor activity, motor activity, nucleotide binding, protein binding                                                           | actin filament-based movement, cell adhesion, cell morphogenesis involved in differentiation, cell motion, cell-cell adhesion, establishment of meiotic spindle localization, establishment of T cell polarity, in utero embryonic development, meiotic metaphase I, meiotic spindle organization, myoblast fusion, regulation of cell shape, uropod organization |
| isocitrate dehydrogenase 2 (NADP+), mitochondrial                             | Idh2      | NP_766599    | 51       | 375           | mitochondrial inner membrane, mitochondrion                                                                                                                                                           | isocitrate dehydrogenase (NADP+) activity, magnesium ion binding, manganese ion binding, metal ion binding, NAD or NADH binding, oxidoreductase activity, oxidoreductase activity, acting on the CH-OH group of donors, NAD or NADP as acceptor                   | glyoxylate cycle, isocitrate metabolic process, oxidation reduction, response to stress, tricarboxylic acid cycle                                                                                                                                                                                                                                                 |
| malate dehydrogenase 2, NAD (mitochondrial)                                   | Mdh2      | NP_032643    | 36       | 374           | mitochondrial inner membrane, mitochondrion                                                                                                                                                           | binding, catalytic activity, L-malate dehydrogenase activity, malate dehydrogenase activity, oxidoreductase activity, oxidoreductase activity, acting on the CH-OH group of donors, NAD or NADP as acceptor, protein binding                                      | carbohydrate metabolic process, cellular carbohydrate metabolic process, glycolysis, malate metabolic process, metabolic process, oxidation reduction, tricarboxylic acid cycle                                                                                                                                                                                   |
| actin, gamma, cytoplasmic 1                                                   | Actg1     | NP_033739    | 42       | 363           | actin cytoskeleton, costamere, cytoplasm, cytoskeleton, myofibril                                                                                                                                     | ATP binding, nucleotide binding, protein binding, structural constituent of cytoskeleton                                                                                                                                                                          | sarcomere organization                                                                                                                                                                                                                                                                                                                                            |
| ATPase, H+ transporting, lysosomal V1 subunit A                               | Atp6v1a   | NP_031534    | 68       | 337           | cytosol, mitochondrion, plasma membrane, proton-transporting two-sector ATPase complex, proton-transporting two-sector ATPase complex, catalytic domain, proton-transporting V-type ATPase, V1 domain | ATP binding, hydrogen ion transporting ATP synthase activity, rotational mechanism, hydrolase activity, acting on acid anhydrides, catalyzing transmembrane movement of substances, nucleotide binding, proton-transporting ATPase activity, rotational mechanism | ATP metabolic process, ATP synthesis coupled proton transport, ion transport, proton transport, transport                                                                                                                                                                                                                                                         |
| solute carrier family 25 (mitochondrial carrier, phosphate carrier), member 3 | Slc25a3   | NP_598429    | 40       | 337           | integral to membrane, membrane, mitochondrial inner membrane, mitochondrion                                                                                                                           | binding, symporter activity                                                                                                                                                                                                                                       | transport                                                                                                                                                                                                                                                                                                                                                         |
| histone cluster 1, H4a                                                        | Hist1h4a  | NP_835499    | 11       | 335           | chromosome, nucleosome, nucleus                                                                                                                                                                       | DNA binding                                                                                                                                                                                                                                                       | nucleosome assembly                                                                                                                                                                                                                                                                                                                                               |

| Protein Name                                       | Gene Name | Accession No | Mw (kDa) | Peptide Count | GO Component                                                                                                                                       | GO Function                                                                                                                                                                                                                                                    | GO Process                                                                                                                              |
|----------------------------------------------------|-----------|--------------|----------|---------------|----------------------------------------------------------------------------------------------------------------------------------------------------|----------------------------------------------------------------------------------------------------------------------------------------------------------------------------------------------------------------------------------------------------------------|-----------------------------------------------------------------------------------------------------------------------------------------|
| hemoglobin alpha 1 chain                           | Hba-a1    | NP_032244    | 15       | 314           | hemoglobin complex                                                                                                                                 | heme binding, iron ion binding, metal ion binding, oxygen binding, oxygen transporter activity                                                                                                                                                                 | erythrocyte development, in utero embryonic development, oxygen transport, transport                                                    |
| heat shock protein 9                               | Hspa9     | NP_034611    | 73       | 294           | cytoplasm, mitochondrion                                                                                                                           | ATP binding, enzyme binding, nucleotide binding, protein binding, unfolded protein binding                                                                                                                                                                     | protein export from nucleus, protein folding, response to stress                                                                        |
| mitochondrial trifunctional protein, alpha subunit | Hadha     | NP_849209    | 83       | 287           | fatty acid beta-oxidation multienzyme complex, mitochondrial inner membrane, mitochondrion                                                         | 3-hydroxyacyl-CoA dehydrogenase activity, binding, catalytic activity, coenzyme binding, enoyl-CoA hydratase activity, long-chain-3-hydroxyacyl-CoA dehydrogenase activity, lyase activity, oxidoreductase activity                                            | fatty acid beta-oxidation, fatty acid metabolic process, lipid metabolic process, metabolic process, oxidation reduction                |
| oxoglutarate dehydrogenase (lipoamide)             | Ogdh      | NP_035086    | 116      | 276           | mitochondrion                                                                                                                                      | oxidoreductase activity, oxidoreductase activity, acting on the aldehyde or oxo group of donors, disulfide as acceptor, oxoglutarate dehydrogenase (NAD+) activity, oxoglutarate dehydrogenase (succinyl-transferring) activity, thiamin pyrophosphate binding | glycolysis, metabolic process, oxidation reduction                                                                                      |
| clathrin, heavy polypeptide (Hc)                   | Cltc      | NP_001003908 | 192      | 248           | clathrin coat of coated pit, clathrin coat of trans-Golgi network vesicle, coated pit, cytoplasmic vesicle, membrane, membrane coat, mitochondrion | binding, protein binding, structural molecule activity                                                                                                                                                                                                         | intracellular protein transport, vesicle-mediated transport                                                                             |
| acyl-CoA synthetase medium-chain family member 2   | Acsm2     | NP_666309    | 64       | 245           | cellular_component, mitochondrion                                                                                                                  | ATP binding, butyrate-CoA ligase activity, catalytic activity, ligase activity, magnesium ion binding, metal ion binding, molecular_function, nucleotide binding                                                                                               | biological_process, fatty acid metabolic process, lipid metabolic process, metabolic process                                            |
| filamin B, beta                                    | Flnb      | NP_598841    | 277      | 240           | cytoplasm, cytoskeleton, focal adhesion, stress fiber                                                                                              | actin binding, protein binding                                                                                                                                                                                                                                 | skeletal muscle tissue development                                                                                                      |
| succinate dehydrogenase Fp subunit                 | Sdha      | NP_075770    | 73       | 237           | membrane, mitochondrial inner membrane, mitochondrion                                                                                              | electron carrier activity, FAD binding, oxidoreductase activity, oxidoreductase activity, acting on the CH-CH group of donors, succinate dehydrogenase (ubiquinone) activity                                                                                   | electron transport chain, oxidation reduction, transport, tricarboxylic acid cycle                                                      |
| aldehyde dehydrogenase 1 family, member L1         | Aldh1l1   | NP_081682    | 99       | 233           | cytoplasm                                                                                                                                          | acyl carrier activity, formyltetrahydrofolate dehydrogenase activity, hydroxymethyl-, formyl- and related transferase activity, methyltransferase activity, oxidoreductase activity, phosphopantetheine binding                                                | 10-formyltetrahydrofolate catabolic process, biosynthetic process, metabolic process, one-carbon metabolic process, oxidation reduction |

| Protein Name                                                                                 | Gene Name | Accession No | Mw (kDa) | Peptide Count | GO Component                                                                                                                          | GO Function                                                                                                                                                                                                                                                                                                                           | GO Process                                                                                                                                                                                                                                       |
|----------------------------------------------------------------------------------------------|-----------|--------------|----------|---------------|---------------------------------------------------------------------------------------------------------------------------------------|---------------------------------------------------------------------------------------------------------------------------------------------------------------------------------------------------------------------------------------------------------------------------------------------------------------------------------------|--------------------------------------------------------------------------------------------------------------------------------------------------------------------------------------------------------------------------------------------------|
| nicotinamide nucleotide transhydrogenase                                                     | Nnt       | NP_032736    | 114      | 231           | integral to membrane, membrane, mitochondrial inner membrane, mitochondrion                                                           | binding, catalytic activity, electron carrier activity, NAD(P) transhydrogenase activity, NAD(P)+ transhydrogenase (AB-specific) activity, oxidoreductase activity                                                                                                                                                                    | metabolic process, oxidation reduction, proton transport                                                                                                                                                                                         |
| solute carrier family 25 (mitochondrial carrier; adenine nucleotide translocator), member 31 | Slc25a31  | NP_848473    | 35       | 228           | cell projection, cilium, flagellum, integral to membrane, membrane, mitochondrial inner membrane, mitochondrion                       | binding, transporter activity                                                                                                                                                                                                                                                                                                         | transport                                                                                                                                                                                                                                        |
| ATP synthase, H+ transporting, mitochondrial F1 complex, O subunit                           | Atp5o     | NP_613063    | 23       | 202           | membrane, mitochondrial inner membrane, mitochondrion, plasma membrane, proton-transporting ATP synthase complex, catalytic core F(1) | hydrogen ion transporting, ATP synthase activity, rotational mechanism                                                                                                                                                                                                                                                                | ATP biosynthetic process, ATP synthesis coupled proton transport, ion transport, proton transport, transport                                                                                                                                     |
| acetyl-CoA synthetase 2-like                                                                 | Acss1     | NP_542142    | 75       | 192           | mitochondrial matrix, mitochondrion                                                                                                   | acetate-CoA ligase activity, AMP binding, ATP binding, catalytic activity, ligase activity, nucleotide binding                                                                                                                                                                                                                        | acetyl-CoA biosynthetic process, metabolic process                                                                                                                                                                                               |
| peroxiredoxin 5 precursor                                                                    | Prdx5     | NP_036151    | 22       | 179           | cytoplasm, mitochondrion, peroxisome                                                                                                  | antioxidant activity, oxidoreductase activity, peroxidase activity, peroxiredoxin activity                                                                                                                                                                                                                                            | cell redox homeostasis, oxidation reduction                                                                                                                                                                                                      |
| acetyl-Coenzyme A acetyltransferase 1 precursor                                              | Acat1     | NP_659033    | 45       | 179           | mitochondrial inner membrane, mitochondrion                                                                                           | acetyl-CoA C-acetyltransferase activity, acyltransferase activity, catalytic activity, metal ion binding, potassium ion binding, transferase activity, transferase activity, transferring acyl groups other than amino-acyl groups                                                                                                    | metabolic process                                                                                                                                                                                                                                |
| glutamate oxaloacetate transaminase 2, mitochondrial                                         | Got2      | NP_034455    | 47       | 173           | membrane, mitochondrial inner membrane, mitochondrion, plasma membrane                                                                | catalytic activity, L-aspartate:2-oxoglutarate aminotransferase activity, pyridoxal phosphate binding, transaminase activity, transferase activity, transferase activity, transferring nitrogenous groups                                                                                                                             | aspartate biosynthetic process, biosynthetic process, cellular amino acid metabolic process, glutamate catabolic process to 2-oxoglutarate, glutamate catabolic process to aspartate, lipid transport, oxaloacetate metabolic process, transport |
| NADH dehydrogenase (ubiquinone) Fe-S protein 1                                               | Ndufs1    | NP_663493    | 80       | 171           | membrane, mitochondrial inner membrane, mitochondrion, respiratory chain                                                              | 2 iron, 2 sulfur cluster binding, 4 iron, 4 sulfur cluster binding, electron carrier activity, iron ion binding, iron-sulfur cluster binding, metal ion binding, molecular_function, NADH dehydrogenase (ubiquinone) activity, NADH dehydrogenase activity, oxidoreductase activity, oxidoreductase activity, acting on NADH or NADPH | ATP synthesis coupled electron transport, biological_process, electron transport chain, oxidation reduction, transport                                                                                                                           |
| heat shock protein 8                                                                         | Hspa8     | NP_112442    | 71       | 168           | cytosol, intracellular                                                                                                                | ATP binding, ATPase activity, coupled, nucleotide binding, protein binding, unfolded protein binding                                                                                                                                                                                                                                  | chaperone mediated protein folding requiring cofactor, protein folding, regulation of cell cycle, response to stress                                                                                                                             |

| Protein Name                                           | Gene Name    | Accession No | Mw (kDa) | Peptide Count | GO Component                                                                                                          | GO Function                                                                                                                                                               | GO Process                                                                                                                                                                                                                                                                                                                                                            |
|--------------------------------------------------------|--------------|--------------|----------|---------------|-----------------------------------------------------------------------------------------------------------------------|---------------------------------------------------------------------------------------------------------------------------------------------------------------------------|-----------------------------------------------------------------------------------------------------------------------------------------------------------------------------------------------------------------------------------------------------------------------------------------------------------------------------------------------------------------------|
| PREDICTED: hypothetical protein isoform 2              | LOC100039281 | XP_001472561 | 19       | 159           | not classified                                                                                                        | not classified                                                                                                                                                            | not classified                                                                                                                                                                                                                                                                                                                                                        |
| dihydropyridine dehydrogenase                          | Dld          | NP_031887    | 54       | 149           | acrosomal matrix, cytoplasm, flagellum, mitochondrion                                                                 | dihydropyridine dehydrogenase activity, FAD binding, oxidoreductase activity                                                                                              | cell redox homeostasis, gastrulation, mitochondrial electron transport, NADH to ubiquinone, oxidation reduction, proteolysis, regulation of membrane potential, sperm capacitation                                                                                                                                                                                    |
| Na <sup>+</sup> /K <sup>+</sup> -ATPase beta 1 subunit | Atp1b1       | NP_033851    | 35       | 149           | basolateral plasma membrane, integral to membrane, membrane, plasma membrane                                          | potassium ion binding, protein binding, sodium ion binding, sodium:potassium-exchanging ATPase activity                                                                   | ATP biosynthetic process, ion transport, potassium ion transport, sodium ion transport, transport                                                                                                                                                                                                                                                                     |
| ubiquinol cytochrome c reductase core protein 2        | Uqcrc2       | NP_080175    | 48       | 149           | membrane, mitochondrial inner membrane, mitochondrion, respiratory chain                                              | catalytic activity, metal ion binding, metalloendopeptidase activity, zinc ion binding                                                                                    | electron transport chain, proteolysis, transport                                                                                                                                                                                                                                                                                                                      |
| aldehyde dehydrogenase family 6, subfamily A1          | Aldh6a1      | NP_598803    | 58       | 147           | mitochondrion                                                                                                         | malonate-semialdehyde dehydrogenase (acetylating) activity, methylmalonate-semialdehyde dehydrogenase (acetylating) activity, molecular_function, oxidoreductase activity | brown fat cell differentiation, metabolic process, oxidation reduction, valine metabolic process                                                                                                                                                                                                                                                                      |
| heat shock protein 1, beta                             | Hsp90ab1     | NP_032328    | 83       | 146           | cytoplasm, intracellular, mitochondrion                                                                               | ATP binding, nucleotide binding, protein binding, unfolded protein binding                                                                                                | placenta development, protein folding, response to stress                                                                                                                                                                                                                                                                                                             |
| cytochrome c oxidase subunit IV isoform 1              | Cox4i1       | NP_034071    | 20       | 141           | membrane, mitochondrial inner membrane, mitochondrion                                                                 | cytochrome-c oxidase activity, protein binding                                                                                                                            | not classified                                                                                                                                                                                                                                                                                                                                                        |
| inner membrane protein, mitochondrial                  | Immt         | NP_083949    | 84       | 132           | integral to membrane, integral to mitochondrial inner membrane, membrane, mitochondrial inner membrane, mitochondrion | molecular_function                                                                                                                                                        | biological_process                                                                                                                                                                                                                                                                                                                                                    |
| peroxiredoxin 1                                        | Prdx1        | NP_035164    | 22       | 130           | cytoplasm, nucleus                                                                                                    | antioxidant activity, oxidoreductase activity, peroxidase activity, peroxiredoxin activity                                                                                | cell proliferation, cell redox homeostasis, erythrocyte homeostasis, hydrogen peroxide catabolic process, natural killer cell mediated cytotoxicity, oxidation reduction, regulation of NF-kappaB import into nucleus, regulation of stress-activated MAPK cascade, removal of superoxide radicals, response to oxidative stress, response to reactive oxygen species |
| 3-oxoacid CoA transferase 1                            | Oxct1        | NP_077150    | 56       | 127           | mitochondrion                                                                                                         | 3-oxoacid CoA-transferase activity, CoA-transferase activity, transferase activity                                                                                        | cellular ketone body metabolic process, ketone body catabolic process, metabolic process                                                                                                                                                                                                                                                                              |
| histone cluster 2, H2be                                | Hist2h2be    | NP_835586    | 14       | 125           | chromosome, nucleosome, nucleus                                                                                       | DNA binding, protein binding                                                                                                                                              | nucleosome assembly                                                                                                                                                                                                                                                                                                                                                   |
| IQ motif containing GTPase activating protein 1        | Iqgap1       | NP_057930    | 189      | 123           | cell leading edge, cytoplasm, intracellular, membrane, neuron projection, plasma membrane                             | calmodulin binding, GTPase activator activity, protein binding, Ras GTPase activator activity                                                                             | regulation of small GTPase mediated signal transduction, small GTPase mediated signal transduction                                                                                                                                                                                                                                                                    |

| Protein Name                                     | Gene Name | Accession No | Mw (kDa) | Peptide Count | GO Component                                                                                                                                             | GO Function                                                                                                                                                          | GO Process                                                                                                                                                                                                                                                                 |
|--------------------------------------------------|-----------|--------------|----------|---------------|----------------------------------------------------------------------------------------------------------------------------------------------------------|----------------------------------------------------------------------------------------------------------------------------------------------------------------------|----------------------------------------------------------------------------------------------------------------------------------------------------------------------------------------------------------------------------------------------------------------------------|
| actinin, alpha 1                                 | Actn1     | NP_598917    | 103      | 120           | actin cytoskeleton, cortical cytoskeleton, cytoplasm, cytoskeleton, dense core granule membrane, focal adhesion, secretory granule, stress fiber, Z disc | actin binding, actin filament binding, calcium ion binding, protein binding, protein homodimerization activity                                                       | actin filament bundle formation, cortical cytoskeleton organization                                                                                                                                                                                                        |
| heat shock protein 2                             | Hspa2     | NP_001002012 | 70       | 118           | mitochondrion                                                                                                                                            | ATP binding, nucleotide binding, protein binding                                                                                                                     | response to stress                                                                                                                                                                                                                                                         |
| triosephosphate isomerase 1                      | Tpi1      | NP_033441    | 27       | 117           | not classified                                                                                                                                           | catalytic activity, isomerase activity, triose-phosphate isomerase activity                                                                                          | embryonic development, fatty acid biosynthetic process, gluconeogenesis, glucose metabolic process, glyceraldehyde-3-phosphate metabolic process, glycolysis, lipid biosynthetic process, metabolic process, multicellular organismal development, pentose-phosphate shunt |
| cytochrome c oxidase subunit II                  | COX2      | NP_904331    | 26       | 117           | integral to membrane, membrane, mitochondrial inner membrane, mitochondrion, respiratory chain                                                           | copper ion binding, cytochrome-c oxidase activity, electron carrier activity, metal ion binding, oxidoreductase activity                                             | electron transport chain, oxidation reduction, transport                                                                                                                                                                                                                   |
| heat shock protein 1 (chaperonin)                | Hspd1     | NP_034607    | 61       | 115           | cytoplasm, intracellular membrane-bounded organelle, mitochondrial inner membrane, mitochondrion, plasma membrane part, secretory granule                | ATP binding, lipopolysaccharide binding, nucleotide binding, protein binding                                                                                         | cellular protein metabolic process, positive regulation of interferon-alpha production, positive regulation of interferon-gamma production, positive regulation of T cell activation, protein folding, T cell activation                                                   |
| ATPase, H+ transporting, lysosomal V1 subunit B1 | Atp6v1b1  | NP_598918    | 57       | 114           | apical plasma membrane, basolateral plasma membrane, membrane fraction                                                                                   | hydrogen ion transmembrane transporter activity                                                                                                                      | ion transport, proton transport, regulation of pH, sensory perception of sound, transport                                                                                                                                                                                  |
| hemoglobin, beta adult minor chain               | Hbb-b2    | NP_058652    | 16       | 112           | hemoglobin complex                                                                                                                                       | heme binding, iron ion binding, metal ion binding, oxygen binding, oxygen transporter activity                                                                       | oxygen transport, transport                                                                                                                                                                                                                                                |
| glutamate dehydrogenase 1                        | Glud1     | NP_032159    | 61       | 110           | mitochondrial inner membrane, mitochondrion                                                                                                              | ATP binding, binding, catalytic activity, glutamate dehydrogenase [NAD(P)+] activity, GTP binding, nucleotide binding, oxidoreductase activity, protein binding      | cellular amino acid metabolic process, metabolic process, oxidation reduction, positive regulation of insulin secretion                                                                                                                                                    |
| lactate dehydrogenase B                          | Ldhb      | NP_032518    | 37       | 109           | cytoplasm                                                                                                                                                | catalytic activity, L-lactate dehydrogenase activity, oxidoreductase activity, oxidoreductase activity, acting on the CH-OH group of donors, NAD or NADP as acceptor | anaerobic glycolysis, carbohydrate metabolic process, cellular carbohydrate metabolic process, glycolysis, oxidation reduction                                                                                                                                             |
| hexokinase 1                                     | Hk1       | NP_034568    | 106      | 109           | cytosol, membrane, mitochondrial outer membrane, mitochondrion                                                                                           | ATP binding, hexokinase activity, kinase activity, nucleotide binding, phosphotransferase activity, alcohol group as acceptor, transferase activity                  | carbohydrate metabolic process, glycolysis                                                                                                                                                                                                                                 |
| histone cluster 2, H2bb                          | Hist2h2bb | NP_783597    | 14       | 108           | chromosome, nucleosome, nucleus                                                                                                                          | DNA binding                                                                                                                                                          | not classified                                                                                                                                                                                                                                                             |

| Protein Name                                                                  | Gene Name         | Accession No | Mw (kDa) | Peptide Count | GO Component                                                                                                                                                                                        | GO Function                                                                                                                                                                                                 | GO Process                                                                                                                                                                      |
|-------------------------------------------------------------------------------|-------------------|--------------|----------|---------------|-----------------------------------------------------------------------------------------------------------------------------------------------------------------------------------------------------|-------------------------------------------------------------------------------------------------------------------------------------------------------------------------------------------------------------|---------------------------------------------------------------------------------------------------------------------------------------------------------------------------------|
| propionyl-Coenzyme A carboxylase, alpha polypeptide                           | Pcca              | NP_659093    | 80       | 107           | mitochondrion                                                                                                                                                                                       | ATP binding, biotin binding, catalytic activity, ligase activity, nucleotide binding, propionyl-CoA carboxylase activity                                                                                    | metabolic process                                                                                                                                                               |
| malate dehydrogenase 1, NAD (soluble)                                         | Mdh1              | NP_032644    | 36       | 106           | cytoplasm, cytosol                                                                                                                                                                                  | binding, catalytic activity, L-malate dehydrogenase activity, malate dehydrogenase activity, oxidoreductase activity, oxidoreductase activity, acting on the CH-OH group of donors, NAD or NADP as acceptor | carbohydrate metabolic process, cellular carbohydrate metabolic process, glycolysis, malate metabolic process, metabolic process, oxidation reduction, tricarboxylic acid cycle |
| predicted gene, OTTMUSG0000007855                                             | OTTMUSG0000007855 | NP_001074488 | 15       | 103           | not classified                                                                                                                                                                                      | not classified                                                                                                                                                                                              | not classified                                                                                                                                                                  |
| ubiquinol-cytochrome c reductase core protein 1                               | Uqcrc1            | NP_079683    | 53       | 102           | membrane, mitochondrial inner membrane, mitochondrion, respiratory chain                                                                                                                            | catalytic activity, metal ion binding, metalloendopeptidase activity, zinc ion binding                                                                                                                      | electron transport chain, mitochondrial electron transport, ubiquinol to cytochrome c, proteolysis, transport                                                                   |
| electron transferring flavoprotein, alpha polypeptide                         | Etfa              | NP_663590    | 35       | 102           | mitochondrial electron transfer flavoprotein complex, mitochondrion                                                                                                                                 | electron carrier activity, FAD binding                                                                                                                                                                      | electron transport chain, transport                                                                                                                                             |
| glyceraldehyde-3-phosphate dehydrogenase                                      | Gapdh             | NP_032110    | 36       | 101           | cytoplasm, mitochondrion                                                                                                                                                                            | glyceraldehyde-3-phosphate dehydrogenase (phosphorylating) activity, glyceraldehyde-3-phosphate dehydrogenase activity, NAD or NADH binding, oxidoreductase activity, protein binding                       | glucose metabolic process, glycolysis, multicellular organismal development, oxidation reduction                                                                                |
| leucine-rich PPR motif-containing protein                                     | Lrpprc            | NP_082509    | 157      | 101           | cytoplasm, membrane, mitochondrion, nucleus                                                                                                                                                         | DNA binding, protein binding, RNA binding, single-stranded DNA binding                                                                                                                                      | mRNA transport, regulation of transcription, transcription, transport                                                                                                           |
| aldolase A, fructose-bisphosphate                                             | Aldoa             | NP_031464    | 39       | 99            | extracellular region, flagellum, platelet alpha granule lumen                                                                                                                                       | catalytic activity, fructose-bisphosphate aldolase activity, lyase activity                                                                                                                                 | glycolysis, metabolic process                                                                                                                                                   |
| pyruvate kinase, muscle                                                       | Pkm2              | NP_035229    | 58       | 99            | cytoplasm, flagellum, mitochondrion, nucleus                                                                                                                                                        | ATP binding, catalytic activity, kinase activity, magnesium ion binding, metal ion binding, nucleotide binding, potassium ion binding, protein binding, pyruvate kinase activity, transferase activity      | glycolysis                                                                                                                                                                      |
| tubulin, alpha 4                                                              | Tuba4a            | NP_033473    | 50       | 98            | microtubule, protein complex                                                                                                                                                                        | GTP binding, GTPase activity, nucleotide binding, structural molecule activity                                                                                                                              | microtubule-based movement, microtubule-based process, protein polymerization                                                                                                   |
| ATP synthase, H+ transporting, mitochondrial F0 complex, subunit b, isoform 1 | Atp5f1            | NP_033855    | 29       | 98            | membrane, mitochondrial inner membrane, mitochondrial proton-transporting ATP synthase complex, coupling factor F(o), mitochondrion, proton-transporting ATP synthase complex, coupling factor F(o) | hydrogen ion transmembrane transporter activity                                                                                                                                                             | ATP synthesis coupled proton transport, ion transport, proton transport, transport                                                                                              |



| Protein Name                                   | Gene Name | Accession No | Mw (kDa) | Peptide Count | GO Component                                                                                                                             | GO Function                                                                                                                                                                                                                                    | GO Process                                                                                                                                                                                                                                                                                                                                                                                                                                                                                                                                                                                                                                                                                                                                                                                                                                                                                                  |
|------------------------------------------------|-----------|--------------|----------|---------------|------------------------------------------------------------------------------------------------------------------------------------------|------------------------------------------------------------------------------------------------------------------------------------------------------------------------------------------------------------------------------------------------|-------------------------------------------------------------------------------------------------------------------------------------------------------------------------------------------------------------------------------------------------------------------------------------------------------------------------------------------------------------------------------------------------------------------------------------------------------------------------------------------------------------------------------------------------------------------------------------------------------------------------------------------------------------------------------------------------------------------------------------------------------------------------------------------------------------------------------------------------------------------------------------------------------------|
| superoxide dismutase 2, mitochondrial          | Sod2      | NP_038699    | 25       | 98            | mitochondrial inner membrane, mitochondrion                                                                                              | manganese ion binding, metal ion binding, oxidoreductase activity, superoxide dismutase activity                                                                                                                                               | age-dependent response to oxidative stress, apoptosis, detection of oxygen, double-strand break repair, erythropoiesis, glutathione metabolic process, heart development, hemopoiesis, iron ion homeostasis, liver development, locomotory behavior, mitochondrion organization, negative regulation of apoptosis, negative regulation of fat cell differentiation, negative regulation of fibroblast proliferation, neuron development, oxidation reduction, positive regulation of nitric oxide biosynthetic process, post-embryonic development, regulation of blood pressure, regulation of catalytic activity, regulation of mitochondrial membrane potential, release of cytochrome c from mitochondria, removal of superoxide radicals, respiratory electron transport chain, response to activity, response to axon injury, response to gamma radiation, response to hydrogen peroxide, response to |
| voltage-dependent anion channel 1              | Vdac1     | NP_035824    | 31       | 95            | integral to membrane, membrane, mitochondrial inner membrane, mitochondrial outer membrane, mitochondrion, plasma membrane, pore complex | nucleotide binding, voltage-gated anion channel activity                                                                                                                                                                                       | anion transport, apoptosis, behavioral fear response, ion transport, learning, nerve-nerve synaptic transmission, synaptic transmission, transport                                                                                                                                                                                                                                                                                                                                                                                                                                                                                                                                                                                                                                                                                                                                                          |
| acyl-Coenzyme A dehydrogenase, very long chain | Acadvl    | NP_059062    | 71       | 94            | membrane, mitochondrial inner membrane, mitochondrion                                                                                    | acyl-CoA dehydrogenase activity, electron carrier activity, FAD binding, oxidoreductase activity, oxidoreductase activity, acting on the CH-CH group of donors                                                                                 | fatty acid metabolic process, lipid metabolic process, metabolic process, oxidation reduction                                                                                                                                                                                                                                                                                                                                                                                                                                                                                                                                                                                                                                                                                                                                                                                                               |
| pyruvate dehydrogenase (lipoamide) beta        | Pdhb      | NP_077183    | 39       | 94            | mitochondrion                                                                                                                            | catalytic activity, oxidoreductase activity, pyruvate dehydrogenase (acetyl-transferring) activity                                                                                                                                             | glycolysis, metabolic process, oxidation reduction                                                                                                                                                                                                                                                                                                                                                                                                                                                                                                                                                                                                                                                                                                                                                                                                                                                          |
| isocitrate dehydrogenase 3 (NAD+) alpha        | Idh3a     | NP_083849    | 40       | 94            | mitochondrion                                                                                                                            | isocitrate dehydrogenase (NAD+) activity, magnesium ion binding, manganese ion binding, metal ion binding, NAD or NADH binding, oxidoreductase activity, oxidoreductase activity, acting on the CH-OH group of donors, NAD or NADP as acceptor | oxidation reduction, tricarboxylic acid cycle                                                                                                                                                                                                                                                                                                                                                                                                                                                                                                                                                                                                                                                                                                                                                                                                                                                               |

| Protein Name                                                                                | Gene Name | Accession No | Mw (kDa) | Peptide Count | GO Component                                                                                                                                                                                     | GO Function                                                                                                                                                                                                                      | GO Process                                                                                                                                                                                                |
|---------------------------------------------------------------------------------------------|-----------|--------------|----------|---------------|--------------------------------------------------------------------------------------------------------------------------------------------------------------------------------------------------|----------------------------------------------------------------------------------------------------------------------------------------------------------------------------------------------------------------------------------|-----------------------------------------------------------------------------------------------------------------------------------------------------------------------------------------------------------|
| apoptosis-inducing factor, mitochondrion-associated 1                                       | Aifm1     | NP_036149    | 67       | 91            | cytoplasm, cytosol, microsome, mitochondrial intermembrane space, mitochondrial outer membrane, mitochondrion, nucleus, soluble fraction                                                         | DNA binding, electron-transferring-flavoprotein dehydrogenase activity, FAD binding, oxidoreductase activity                                                                                                                     | apoptosis, apoptotic mitochondrial changes, cell redox homeostasis, DNA fragmentation involved in apoptosis, neuron apoptosis, oxidation reduction                                                        |
| solute carrier family 25 (mitochondrial carrier, adenine nucleotide translocator), member 4 | Slc25a4   | NP_031476    | 33       | 89            | integral to membrane, membrane, mitochondrial inner membrane, mitochondrial outer membrane, mitochondrion                                                                                        | binding, transporter activity                                                                                                                                                                                                    | transport                                                                                                                                                                                                 |
| tubulin, beta 3                                                                             | Tubb3     | NP_075768    | 50       | 89            | axon, intracellular, microtubule, microtubule cytoskeleton, protein complex                                                                                                                      | GTP binding, GTPase activity, nucleotide binding, structural molecule activity                                                                                                                                                   | microtubule-based movement, microtubule-based process, protein polymerization                                                                                                                             |
| aldehyde dehydrogenase 2, mitochondrial                                                     | Aldh2     | NP_033786    | 57       | 88            | mitochondrion                                                                                                                                                                                    | aldehyde dehydrogenase (NAD) activity, oxidoreductase activity                                                                                                                                                                   | metabolic process, oxidation reduction                                                                                                                                                                    |
| H2A histone family, member X                                                                | H2afx     | NP_034566    | 15       | 88            | chromatin, chromosome, male germ cell nucleus, nuclear chromatin, nucleosome, nucleus, replication fork, XY body                                                                                 | damaged DNA binding, DNA binding, protein binding                                                                                                                                                                                | cell cycle, DNA damage checkpoint, DNA recombination, DNA repair, double-strand break repair via homologous recombination, meiosis, nucleosome assembly, response to DNA damage stimulus, spermatogenesis |
| citrate synthase                                                                            | Cs        | NP_080720    | 52       | 87            | mitochondrion                                                                                                                                                                                    | citrate (Si)-synthase activity, protein binding, transferase activity, transferring acyl groups, acyl groups converted into alkyl on transfer                                                                                    | cellular carbohydrate metabolic process, tricarboxylic acid cycle                                                                                                                                         |
| histone cluster 1, H1c                                                                      | Hist1h1c  | NP_056601    | 21       | 86            | chromosome, nucleosome, nucleus                                                                                                                                                                  | DNA binding, protein binding                                                                                                                                                                                                     | nucleosome assembly, nucleosome positioning                                                                                                                                                               |
| enolase 1, alpha non-neuron                                                                 | Eno1      | NP_075608    | 47       | 86            | not classified                                                                                                                                                                                   | lyase activity, magnesium ion binding, phosphopyruvate hydratase activity, protein binding                                                                                                                                       | glycolysis                                                                                                                                                                                                |
| ubiquitin B                                                                                 | Ubb       | NP_035794    | 34       | 85            | cytoplasm, nucleus                                                                                                                                                                               | protein binding                                                                                                                                                                                                                  | not classified                                                                                                                                                                                            |
| vacuolar H <sup>+</sup> ATPase B2                                                           | Atp6v1b2  | NP_031535    | 57       | 84            | cytosol, membrane, plasma membrane, proton-transporting two-sector ATPase complex, proton-transporting two-sector ATPase complex, catalytic domain, proton-transporting V-type ATPase, V1 domain | hydrogen ion transporting ATP synthase activity, rotational mechanism, hydrolase activity, acting on acid anhydrides, catalyzing transmembrane movement of substances, proton-transporting ATPase activity, rotational mechanism | ATP metabolic process, ATP synthesis coupled proton transport, ion transport, proton transport, transport                                                                                                 |
| pyruvate carboxylase                                                                        | Pcx       | NP_032823    | 130      | 82            | cytoplasm, mitochondrial inner membrane, mitochondrion                                                                                                                                           | ATP binding, biotin binding, catalytic activity, ligase activity, manganese ion binding, metal ion binding, nucleotide binding, pyruvate carboxylase activity                                                                    | gluconeogenesis, lipid biosynthetic process, metabolic process                                                                                                                                            |
| protein disulfide isomerase associated 3                                                    | Pdia3     | NP_031978    | 57       | 81            | endoplasmic reticulum                                                                                                                                                                            | isomerase activity, protein disulfide isomerase activity                                                                                                                                                                         | cell redox homeostasis, positive regulation of apoptosis                                                                                                                                                  |

| Protein Name                                                                          | Gene Name | Accession No | Mw (kDa) | Peptide Count | GO Component                                                                                              | GO Function                                                                                                                                                                           | GO Process                                                                                               |
|---------------------------------------------------------------------------------------|-----------|--------------|----------|---------------|-----------------------------------------------------------------------------------------------------------|---------------------------------------------------------------------------------------------------------------------------------------------------------------------------------------|----------------------------------------------------------------------------------------------------------|
| L-3-hydroxyacyl-Coenzyme A dehydrogenase                                              | Hadh      | NP_032238    | 34       | 80            | mitochondrial inner membrane, mitochondrion                                                               | 3-hydroxyacyl-CoA dehydrogenase activity, binding, catalytic activity, coenzyme binding, oxidoreductase activity                                                                      | fatty acid metabolic process, lipid metabolic process, metabolic process, oxidation reduction            |
| dynein, cytoplasmic, heavy chain 1                                                    | Dync1h1   | NP_084514    | 532      | 80            | cytoplasm, dynein complex, microtubule                                                                    | ATP binding, ATPase activity, microtubule motor activity, motor activity, nucleoside-triphosphatase activity, nucleotide binding, protein binding                                     | microtubule-based movement                                                                               |
| peptidylprolyl isomerase A                                                            | Ppia      | NP_032933    | 18       | 79            | cytoplasm, cytosol                                                                                        | isomerase activity, peptide binding, peptidylprolyl cis-trans isomerase activity, protein binding                                                                                     | neuron differentiation, protein folding                                                                  |
| NADH dehydrogenase (ubiquinone) 1 alpha subcomplex, 8                                 | Ndufa8    | NP_080979    | 20       | 79            | mitochondrial inner membrane, mitochondrion, respiratory chain                                            | not classified                                                                                                                                                                        | electron transport chain, transport                                                                      |
| calnexin                                                                              | Canx      | NP_001103970 | 67       | 78            | endoplasmic reticulum, integral to membrane, membrane                                                     | calcium ion binding, protein binding, sugar binding, unfolded protein binding                                                                                                         | protein folding                                                                                          |
| carbonic anhydrase 2                                                                  | Car2      | NP_033931    | 29       | 76            | cytoplasm, cytosol                                                                                        | carbonate dehydratase activity, lyase activity, metal ion binding, zinc ion binding                                                                                                   | carbon dioxide transport, morphogenesis of an epithelium, one-carbon metabolic process, secretion        |
| carnitine palmitoyltransferase 1a, liver                                              | Cpt1a     | NP_038523    | 88       | 76            | integral to membrane, membrane, mitochondrial inner membrane, mitochondrial outer membrane, mitochondrion | acyltransferase activity, carnitine O-palmitoyltransferase activity, transferase activity                                                                                             | fatty acid metabolic process, lipid metabolic process, transport                                         |
| eukaryotic translation elongation factor 1 alpha 1                                    | Eef1a1    | NP_034236    | 50       | 75            | cytoplasm                                                                                                 | GTP binding, nucleotide binding, translation elongation factor activity                                                                                                               | not classified                                                                                           |
| solute carrier family 25 (mitochondrial carrier, Aralar), member 12                   | Slc25a12  | NP_766024    | 75       | 75            | integral to membrane, membrane, mitochondrial inner membrane, mitochondrion                               | binding, calcium ion binding, transporter activity                                                                                                                                    | malate-aspartate shuttle, transport                                                                      |
| dihydrolipoamide S-acetyltransferase (E2 component of pyruvate dehydrogenase complex) | Dlat      | NP_663589    | 68       | 73            | mitochondrial pyruvate dehydrogenase complex, mitochondrion, pyruvate dehydrogenase complex               | acyltransferase activity, dihydrolipoalysine-residue acetyltransferase activity, lipoic acid binding, protein binding, transferase activity                                           | acetyl-CoA biosynthetic process from pyruvate, glycolysis, metabolic process, pyruvate metabolic process |
| creatine kinase, mitochondrial 1, ubiquitous                                          | Ckmt1     | NP_034027    | 47       | 72            | membrane, mitochondrial inner membrane, mitochondrion                                                     | ATP binding, catalytic activity, creatine kinase activity, kinase activity, nucleotide binding, transferase activity, transferase activity, transferring phosphorus-containing groups | not classified                                                                                           |
| mitochondrial trifunctional protein, beta subunit                                     | Hadhb     | NP_663533    | 51       | 71            | mitochondrial inner membrane, mitochondrion                                                               | acetyl-CoA C-acyltransferase activity, acyltransferase activity, transferase activity, transferase activity, transferring acyl groups other than amino-acyl groups                    | fatty acid beta-oxidation, fatty acid metabolic process, lipid metabolic process, metabolic process      |
| calbindin-28K                                                                         | Calb1     | NP_033918    | 30       | 70            | cytoplasm, cytosol, nucleus                                                                               | calcium ion binding, vitamin D binding                                                                                                                                                | locomotory behavior                                                                                      |

| Protein Name                                                                                 | Gene Name | Accession No | Mw (kDa) | Peptide Count | GO Component                                                                                                                                                                                        | GO Function                                                                                                                                                                       | GO Process                                                                                                                              |
|----------------------------------------------------------------------------------------------|-----------|--------------|----------|---------------|-----------------------------------------------------------------------------------------------------------------------------------------------------------------------------------------------------|-----------------------------------------------------------------------------------------------------------------------------------------------------------------------------------|-----------------------------------------------------------------------------------------------------------------------------------------|
| glutaminase isoform 2                                                                        | Gls       | NP_001106854 | 66       | 68            | not classified                                                                                                                                                                                      | glutaminase activity                                                                                                                                                              | behavior, glutamine catabolic process, regulation of respiratory gaseous exchange by neurological system process, synaptic transmission |
| ATPase, H+ transporting, lysosomal V1 subunit H                                              | Atp6v1h   | NP_598587    | 56       | 68            | vacuolar proton-transporting V-type ATPase, V1 domain                                                                                                                                               | binding, hydrolase activity, acting on acid anhydrides, catalyzing transmembrane movement of substances, proton-transporting ATPase activity, rotational mechanism                | ATP synthesis coupled proton transport, ion transport, proton transport, transport                                                      |
| aldehyde dehydrogenase 4 family, member A1                                                   | Aldh4a1   | NP_780647    | 62       | 68            | mitochondrial matrix, mitochondrion                                                                                                                                                                 | 1-pyruvate-5-carboxylate dehydrogenase activity, aldehyde dehydrogenase (NAD) activity, oxidoreductase activity                                                                   | metabolic process, oxidation reduction, proline biosynthetic process, proline metabolic process                                         |
| ATP synthase, H+ transporting, mitochondrial F1F0 complex, subunit e                         | Atp5k     | NP_031533    | 8        | 67            | membrane, mitochondrial inner membrane, mitochondrial proton-transporting ATP synthase complex, coupling factor F(o), mitochondrion, proton-transporting ATP synthase complex, coupling factor F(o) | hydrogen ion transmembrane transporter activity                                                                                                                                   | ATP biosynthetic process, ATP synthesis coupled proton transport, ion transport, proton transport, transport                            |
| solute carrier family 12, member 3                                                           | Slc12a3   | NP_062288    | 111      | 67            | apical plasma membrane, cytosol, integral to membrane, membrane, plasma membrane                                                                                                                    | cation:chloride symporter activity, sodium ion binding, symporter activity, transporter activity                                                                                  | chloride transport, ion transport, sodium ion transport, transport                                                                      |
| heat shock protein 5                                                                         | Hspa5     | NP_071705    | 72       | 65            | cell surface, endoplasmic reticulum, endoplasmic reticulum lumen, extracellular region                                                                                                              | ATP binding, nucleotide binding, protein binding, ribosome binding                                                                                                                | ER overload response, negative regulation of transforming growth factor beta receptor signaling pathway, response to stress             |
| solute carrier family 25 (mitochondrial carrier, adenine nucleotide translocator), member 13 | Slc25a13  | NP_056644    | 74       | 63            | integral to membrane, membrane, mitochondrial inner membrane, mitochondrion                                                                                                                         | binding, calcium ion binding, L-glutamate transmembrane transporter activity                                                                                                      | aspartate transport, malate-aspartate shuttle, transport                                                                                |
| ATP synthase, H+ transporting, mitochondrial F1 complex, delta subunit precursor             | Atp5d     | NP_079589    | 18       | 63            | membrane, mitochondrial envelope, mitochondrial inner membrane, mitochondrion, proton-transporting ATP synthase complex, proton-transporting ATP synthase complex, catalytic core F(1)              | hydrogen ion transmembrane transporter activity, hydrogen ion transporting ATP synthase activity, rotational mechanism, proton-transporting ATPase activity, rotational mechanism | ATP biosynthetic process, ATP synthesis coupled proton transport, ion transport, proton transport, transport                            |
| plectin 1 isoform 2                                                                          | Plec1     | NP_958787    | 516      | 63            | contractile fiber, cytoplasm, cytoskeleton, insoluble fraction                                                                                                                                      | actin binding                                                                                                                                                                     | not classified                                                                                                                          |
| keratin 7                                                                                    | Krt7      | NP_149064    | 51       | 62            | intermediate filament, keratin filament                                                                                                                                                             | protein binding, structural molecule activity                                                                                                                                     | not classified                                                                                                                          |
| fumarate hydratase 1                                                                         | Fh1       | NP_034339    | 54       | 61            | cytoplasm, mitochondrion, tricarboxylic acid cycle enzyme complex                                                                                                                                   | catalytic activity, fumarate hydratase activity, lyase activity                                                                                                                   | fumarate metabolic process, homeostasis of number of cells within a tissue, tricarboxylic acid cycle                                    |

| Protein Name                                                          | Gene Name | Accession No | Mw (kDa) | Peptide Count | GO Component                                                                                                                                                                                                                                        | GO Function                                                                                                                                                                                                                                                                                                                                   | GO Process                                                                                                                                                                                                                                                                        |
|-----------------------------------------------------------------------|-----------|--------------|----------|---------------|-----------------------------------------------------------------------------------------------------------------------------------------------------------------------------------------------------------------------------------------------------|-----------------------------------------------------------------------------------------------------------------------------------------------------------------------------------------------------------------------------------------------------------------------------------------------------------------------------------------------|-----------------------------------------------------------------------------------------------------------------------------------------------------------------------------------------------------------------------------------------------------------------------------------|
| pyruvate dehydrogenase E1 alpha 1                                     | Pdha1     | NP_032836    | 43       | 60            | intracellular membrane-bounded organelle, mitochondrion                                                                                                                                                                                             | oxidoreductase activity, oxidoreductase activity, acting on the aldehyde or oxo group of donors, disulfide as acceptor, pyruvate dehydrogenase (acetyl-transferring) activity, pyruvate dehydrogenase activity                                                                                                                                | glycolysis, metabolic process, oxidation reduction                                                                                                                                                                                                                                |
| actinin alpha 4                                                       | Actn4     | NP_068695    | 105      | 60            | cortical cytoskeleton, cytoplasm, pseudopodium, stress fiber                                                                                                                                                                                        | actin binding, actin filament binding, calcium ion binding, protein homodimerization activity                                                                                                                                                                                                                                                 | actin filament bundle formation, negative regulation of cell motion, positive regulation of cell motion, positive regulation of pinocytosis, protein transport, transport                                                                                                         |
| tubulin, beta 4                                                       | Tubb4     | NP_033477    | 50       | 59            | cell projection, cell soma, cilium, internode region of axon, microtubule, myelin sheath, protein complex                                                                                                                                           | GTP binding, GTPase activity, nucleotide binding, structural molecule activity                                                                                                                                                                                                                                                                | cell projection organization, microtubule-based movement, microtubule-based process, protein polymerization                                                                                                                                                                       |
| valosin containing protein                                            | Vcp       | NP_033529    | 89       | 58            | cytoplasm, microsome, nucleus                                                                                                                                                                                                                       | ATP binding, binding, hydrolase activity, lipid binding, nucleoside-triphosphatase activity, nucleotide binding, protein binding                                                                                                                                                                                                              | activation of caspase activity, modification-dependent protein catabolic process, transport                                                                                                                                                                                       |
| ATPase, H <sup>+</sup> transporting, lysosomal V0 subunit A isoform 4 | Atp6v0a4  | NP_536715    | 96       | 58            | apical part of cell, apical plasma membrane, brush border, endosome, integral to membrane, membrane, plasma membrane, proton-transporting two-sector ATPase complex, proton-transporting domain, vacuolar proton-transporting V-type ATPase complex | hydrogen ion transmembrane transporter activity, hydrogen-exporting ATPase activity, phosphorylative mechanism                                                                                                                                                                                                                                | ATP hydrolysis coupled proton transport, ATP synthesis coupled proton transport, ion transport, proton transport, transport                                                                                                                                                       |
| methylenetetrahydrofolate dehydrogenase 1                             | Mthfd1    | NP_620084    | 101      | 58            | cytoplasm, mitochondrion                                                                                                                                                                                                                            | ATP binding, binding, catalytic activity, formate, tetrahydrofolate ligase activity, formyltetrahydrofolate dehydrogenase activity, hydrolase activity, ligase activity, methenyltetrahydrofolate cyclohydrolase activity, methylenetetrahydrofolate dehydrogenase (NADP <sup>+</sup> ) activity, nucleotide binding, oxidoreductase activity | cellular amino acid biosynthetic process, folic acid and derivative biosynthetic process, histidine biosynthetic process, histidine catabolic process, methionine biosynthetic process, one-carbon metabolic process, oxidation reduction, purine nucleotide biosynthetic process |
| NADH dehydrogenase (ubiquinone) Fe-S protein 3                        | Ndufs3    | NP_080964    | 30       | 57            | membrane, mitochondrial inner membrane, mitochondrion, respiratory chain                                                                                                                                                                            | NADH dehydrogenase (ubiquinone) activity, NADH dehydrogenase activity, oxidoreductase activity, oxidoreductase activity, acting on NADH or NADPH                                                                                                                                                                                              | biological_process, electron transport chain, oxidation reduction, transport                                                                                                                                                                                                      |
| NADH dehydrogenase (ubiquinone) 1 beta subcomplex, 10                 | Ndubf10   | NP_080960    | 21       | 56            | membrane, mitochondrial inner membrane, mitochondrion, respiratory chain                                                                                                                                                                            | not classified                                                                                                                                                                                                                                                                                                                                | electron transport chain, transport                                                                                                                                                                                                                                               |

| Protein Name                                            | Gene Name | Accession No | Mw (kDa) | Peptide Count | GO Component                                                        | GO Function                                                                                                                                                    | GO Process                                                                                                                                                                                                                                                                                                                                                                                                                                                                                                                                                                                                                                                                                                                                  |
|---------------------------------------------------------|-----------|--------------|----------|---------------|---------------------------------------------------------------------|----------------------------------------------------------------------------------------------------------------------------------------------------------------|---------------------------------------------------------------------------------------------------------------------------------------------------------------------------------------------------------------------------------------------------------------------------------------------------------------------------------------------------------------------------------------------------------------------------------------------------------------------------------------------------------------------------------------------------------------------------------------------------------------------------------------------------------------------------------------------------------------------------------------------|
| solute carrier family 12, member 1 isoform F            | Slc12a1   | NP_001073158 | 120      | 55            | apical plasma membrane, integral to membrane, membrane              | cation:chloride symporter activity, potassium ion binding, protein binding, sodium ion binding, symporter activity, transporter activity                       | chloride transport, ion transport, potassium ion transport, sodium ion transport, transport                                                                                                                                                                                                                                                                                                                                                                                                                                                                                                                                                                                                                                                 |
| peroxiredoxin 2                                         | Prdx2     | NP_035693    | 22       | 55            | cytoplasm                                                           | antioxidant activity, oxidoreductase activity, peroxidase activity, peroxiredoxin activity, protein binding, selenium binding, thioredoxin peroxidase activity | activation of MAPK activity, anti-apoptosis, cell redox homeostasis, homeostasis of number of cells, hydrogen peroxide catabolic process, hydrogen peroxide metabolic process, negative regulation of lipopolysaccharide-mediated signaling pathway, negative regulation of NF-kappaB transcription factor activity, negative regulation of oxygen and reactive oxygen species metabolic process, negative regulation of T cell differentiation, oxidation reduction, oxygen and reactive oxygen species metabolic process, regulation of hydrogen peroxide metabolic process, respiratory burst during acute inflammatory response, response to lipopolysaccharide, response to oxidative stress, T cell proliferation, thymus development |
| methylcrotonoyl-Coenzyme A carboxylase 1 (alpha)        | Mccc1     | NP_076133    | 79       | 55            | mitochondrial inner membrane, mitochondrion                         | ATP binding, biotin binding, catalytic activity, ligase activity, methylcrotonoyl-CoA carboxylase activity, nucleotide binding                                 | metabolic process                                                                                                                                                                                                                                                                                                                                                                                                                                                                                                                                                                                                                                                                                                                           |
| heterogeneous nuclear ribonucleoprotein A2/B1 isoform 1 | Hnrnpa2b1 | NP_058086    | 36       | 54            | cytoplasm, nucleus, ribonucleoprotein complex, spliceosomal complex | nucleic acid binding, nucleotide binding, protein binding, RNA binding                                                                                         | mRNA processing, RNA splicing                                                                                                                                                                                                                                                                                                                                                                                                                                                                                                                                                                                                                                                                                                               |
| propionyl Coenzyme A carboxylase, beta polypeptide      | Pccb      | NP_080111    | 58       | 54            | mitochondrion                                                       | ATP binding, ligase activity, nucleotide binding, propionyl-CoA carboxylase activity                                                                           | not classified                                                                                                                                                                                                                                                                                                                                                                                                                                                                                                                                                                                                                                                                                                                              |

| Protein Name                                                                     | Gene Name | Accession No | Mw (kDa) | Peptide Count | GO Component                                                                                                                                                             | GO Function                                                                                                                                                                                             | GO Process                                                                                                                                                                                                                                                                                                                                                                                                                                                                                                                                                                                                                                                                                                                    |
|----------------------------------------------------------------------------------|-----------|--------------|----------|---------------|--------------------------------------------------------------------------------------------------------------------------------------------------------------------------|---------------------------------------------------------------------------------------------------------------------------------------------------------------------------------------------------------|-------------------------------------------------------------------------------------------------------------------------------------------------------------------------------------------------------------------------------------------------------------------------------------------------------------------------------------------------------------------------------------------------------------------------------------------------------------------------------------------------------------------------------------------------------------------------------------------------------------------------------------------------------------------------------------------------------------------------------|
| myosin heavy chain 10, non-muscle                                                | Myh10     | NP_780469    | 229      | 54            | axon, cell cortex, cell soma, cytoplasm, dendritic spine, growth cone, myosin complex, neuromuscular junction, neuron projection, plasma membrane, spindle, stress fiber | actin binding, actin filament binding, actin-dependent ATPase activity, ADP binding, ATP binding, calmodulin binding, microfilament motor activity, motor activity, nucleotide binding, protein binding | actin cytoskeleton organization, actin filament-based movement, adult heart development, axon guidance, axonogenesis, brain development, cardiac myofibril assembly, cell proliferation, cerebellar Purkinje cell layer development, cytokinesis after mitosis, exocytosis, fourth ventricle development, in utero embryonic development, lateral ventricle development, myofibril assembly, neuromuscular process controlling balance, neuron migration, neuron projection development, nuclear migration, plasma membrane repair, regulation of cell shape, retina development in camera-type eye, substrate-bound cell migration, cell extension, third ventricle development, ventricular cardiac muscle cell development |
| histone cluster 1, H2ab                                                          | Hist1h2ab | NP_783591    | 14       | 54            | chromosome, nucleosome, nucleus                                                                                                                                          | DNA binding                                                                                                                                                                                             | nucleosome assembly                                                                                                                                                                                                                                                                                                                                                                                                                                                                                                                                                                                                                                                                                                           |
| ATP synthase, H+ transporting, mitochondrial F1 complex, gamma subunit isoform b | Atp5c1    | NP_001106209 | 30       | 53            | membrane, mitochondrial inner membrane, mitochondrion, proton-transporting ATP synthase complex, catalytic core F(1)                                                     | hydrogen ion transporting ATP synthase activity, rotational mechanism, proton-transporting ATPase activity, rotational mechanism                                                                        | ATP biosynthetic process, ATP synthesis coupled proton transport, ion transport, proton transport, transport                                                                                                                                                                                                                                                                                                                                                                                                                                                                                                                                                                                                                  |
| spectrin beta 3                                                                  | Spnb3     | NP_067262    | 271      | 53            | not classified                                                                                                                                                           | actin binding                                                                                                                                                                                           | not classified                                                                                                                                                                                                                                                                                                                                                                                                                                                                                                                                                                                                                                                                                                                |
| NADH dehydrogenase (ubiquinone) 1 beta subcomplex, 9                             | Ndubf9    | NP_075661    | 22       | 53            | membrane, mitochondrial inner membrane, mitochondrion, respiratory chain                                                                                                 | not classified                                                                                                                                                                                          | electron transport chain, transport                                                                                                                                                                                                                                                                                                                                                                                                                                                                                                                                                                                                                                                                                           |
| NADH dehydrogenase (ubiquinone) 1 alpha subcomplex 10                            | Ndufa10   | NP_077159    | 41       | 53            | mitochondrion, respiratory chain                                                                                                                                         | ATP binding, phosphotransferase activity, alcohol group as acceptor                                                                                                                                     | electron transport chain, nucleobase, nucleoside, nucleotide and nucleic acid metabolic process, transport                                                                                                                                                                                                                                                                                                                                                                                                                                                                                                                                                                                                                    |
| cytochrome c-1                                                                   | Cyc1      | NP_079843    | 35       | 53            | integral to membrane, membrane, mitochondrial inner membrane, mitochondrion, respiratory chain                                                                           | electron carrier activity, heme binding, iron ion binding, metal ion binding                                                                                                                            | electron transport chain, transport                                                                                                                                                                                                                                                                                                                                                                                                                                                                                                                                                                                                                                                                                           |
| phosphoglycerate kinase 1                                                        | Pgk1      | NP_032854    | 45       | 52            | cytoplasm                                                                                                                                                                | ATP binding, kinase activity, nucleotide binding, phosphoglycerate kinase activity, transferase activity                                                                                                | glycolysis                                                                                                                                                                                                                                                                                                                                                                                                                                                                                                                                                                                                                                                                                                                    |
| keratin complex 1, acidic, gene 10                                               | Krt10     | NP_034790    | 57       | 52            | intermediate filament, keratin filament                                                                                                                                  | protein binding, structural molecule activity                                                                                                                                                           | not classified                                                                                                                                                                                                                                                                                                                                                                                                                                                                                                                                                                                                                                                                                                                |

| Protein Name                                                                      | Gene Name | Accession No | Mw (kDa) | Peptide Count | GO Component                                                                             | GO Function                                                                                                                                                                            | GO Process                                                                                                                                                                                              |
|-----------------------------------------------------------------------------------|-----------|--------------|----------|---------------|------------------------------------------------------------------------------------------|----------------------------------------------------------------------------------------------------------------------------------------------------------------------------------------|---------------------------------------------------------------------------------------------------------------------------------------------------------------------------------------------------------|
| succinate-Coenzyme A ligase, GDP-forming, beta subunit                            | Suclg2    | NP_035637    | 47       | 52            | mitochondrion                                                                            | ATP binding, catalytic activity, GTP binding, ligase activity, nucleotide binding, succinate-CoA ligase (GDP-forming) activity, succinate-semialdehyde dehydrogenase activity          | metabolic process, tricarboxylic acid cycle                                                                                                                                                             |
| NADH dehydrogenase (ubiquinone) 1 alpha subcomplex, 9                             | Ndufa9    | NP_079634    | 43       | 52            | mitochondrial inner membrane, mitochondrion, respiratory chain                           | binding, catalytic activity, coenzyme binding                                                                                                                                          | cellular metabolic process, electron transport chain, metabolic process, transport                                                                                                                      |
| IQ motif containing GTPase activating protein 2                                   | Iqgap2    | NP_081987    | 181      | 52            | intracellular                                                                            | calmodulin binding, GTPase activator activity, protein binding                                                                                                                         | regulation of small GTPase mediated signal transduction                                                                                                                                                 |
| heterogeneous nuclear ribonucleoprotein L                                         | Hnrnpl    | NP_796275    | 60       | 52            | nucleus, pronucleus, ribonucleoprotein complex                                           | nucleic acid binding, nucleotide binding, RNA binding                                                                                                                                  | mRNA processing                                                                                                                                                                                         |
| lamin A isoform A                                                                 | Lmna      | NP_001002011 | 74       | 51            | intermediate filament, lamin filament, nucleus                                           | protein binding, structural molecule activity                                                                                                                                          | nuclear envelope organization                                                                                                                                                                           |
| calbindin 2                                                                       | Calb2     | NP_031612    | 31       | 51            | gap junction                                                                             | calcium ion binding                                                                                                                                                                    | not classified                                                                                                                                                                                          |
| heat shock protein 1, alpha                                                       | Hsp90aa1  | NP_034610    | 85       | 51            | cytoplasm, cytosol, intracellular                                                        | ATP binding, nitric-oxide synthase regulator activity, nucleotide binding, protein binding, protein homodimerization activity, unfolded protein binding                                | positive regulation of cytotoxic T cell differentiation, positive regulation of nitric oxide biosynthetic process, protein folding, protein refolding, response to stress, response to unfolded protein |
| glucose phosphate isomerase 1                                                     | Gpi1      | NP_032181    | 63       | 50            | cytoplasm, extracellular region, extracellular space                                     | cytokine activity, glucose-6-phosphate isomerase activity, growth factor activity, isomerase activity, protein binding                                                                 | angiogenesis, gluconeogenesis, glucose metabolic process, glycolysis                                                                                                                                    |
| solute carrier family 25 (mitochondrial carrier oxoglutarate carrier), member 11  | Slc25a11  | NP_077173    | 34       | 50            | integral to membrane, membrane, mitochondrial inner membrane, mitochondrion              | binding, transporter activity                                                                                                                                                          | transport                                                                                                                                                                                               |
| 13kDa differentiation-associated protein                                          | Ndufa12   | NP_079827    | 18       | 50            | membrane, mitochondrial inner membrane, mitochondrion, respiratory chain                 | electron carrier activity, NADH dehydrogenase (ubiquinone) activity                                                                                                                    | electron transport chain, transport                                                                                                                                                                     |
| enoyl Coenzyme A hydratase, short chain, 1, mitochondrial                         | Echs1     | NP_444349    | 31       | 50            | mitochondrion                                                                            | catalytic activity, enoyl-CoA hydratase activity, lyase activity                                                                                                                       | fatty acid metabolic process, lipid metabolic process, metabolic process                                                                                                                                |
| solute carrier family 8 (sodium/calcium exchanger), member 1 isoform B            | Slc8a1    | NP_001106269 | 107      | 49            | integral to membrane, membrane, membrane fraction, plasma membrane, sarcolemma, T-tubule | antiporter activity, calcium ion binding, calcium:sodium antiporter activity, calmodulin binding, protein binding, sodium ion binding                                                  | calcium ion transport, cell communication, ion transport, regulation of the force of heart contraction, sodium ion transport, transport                                                                 |
| acetyl-Coenzyme A acyltransferase 2 (mitochondrial 3-oxoacyl-Coenzyme A thiolase) | Acaa2     | NP_803421    | 42       | 49            | mitochondrial inner membrane, mitochondrion                                              | acetyl-CoA C-acyltransferase activity, acyltransferase activity, catalytic activity, transferase activity, transferase activity, transferring acyl groups other than amino-acyl groups | fatty acid metabolic process, lipid metabolic process, metabolic process                                                                                                                                |
| albumin                                                                           | Alb       | NP_033784    | 69       | 48            | cytoplasm, extracellular region, extracellular space                                     | copper ion binding, lipid binding, metal ion binding                                                                                                                                   | transport                                                                                                                                                                                               |
| brain protein 44                                                                  | Brp44     | NP_081706    | 14       | 48            | mitochondrion                                                                            | not classified                                                                                                                                                                         | not classified                                                                                                                                                                                          |
| tubulin, alpha 1                                                                  | Tuba1a    | NP_035783    | 50       | 47            | cytoplasmic microtubule, microtubule, protein complex                                    | GTP binding, GTPase activity, nucleotide binding, structural molecule activity                                                                                                         | microtubule-based movement, microtubule-based process, protein polymerization                                                                                                                           |



| Protein Name                                                                         | Gene Name    | Accession No | Mw (kDa) | Peptide Count | GO Component                                                                                                                               | GO Function                                                                                                                                                                                                                                                                            | GO Process                                                                                                                                                                                                                                     |
|--------------------------------------------------------------------------------------|--------------|--------------|----------|---------------|--------------------------------------------------------------------------------------------------------------------------------------------|----------------------------------------------------------------------------------------------------------------------------------------------------------------------------------------------------------------------------------------------------------------------------------------|------------------------------------------------------------------------------------------------------------------------------------------------------------------------------------------------------------------------------------------------|
| keratin complex 2, basic, gene 8                                                     | Krt8         | NP_112447    | 55       | 46            | intermediate filament, keratin filament, sarcolemma, Z disc                                                                                | protein binding, structural molecule activity                                                                                                                                                                                                                                          | apoptosis, cell differentiation involved in embryonic placenta development, cell morphogenesis involved in differentiation, multicellular organismal development, response to other organism, tumor necrosis factor-mediated signaling pathway |
| NADH dehydrogenase (ubiquinone) flavoprotein 1                                       | Ndufv1       | NP_598427    | 51       | 46            | membrane, mitochondrial inner membrane, mitochondrion, respiratory chain                                                                   | 4 iron, 4 sulfur cluster binding, FMN binding, iron ion binding, iron-sulfur cluster binding, metal ion binding, NAD or NADH binding, NADH dehydrogenase (ubiquinone) activity, NADH dehydrogenase activity, oxidoreductase activity, oxidoreductase activity, acting on NADH or NADPH | electron transport chain, oxidation reduction, transport                                                                                                                                                                                       |
| ankyrin 3, epithelial isoform h                                                      | Ank3         | NP_733925    | 210      | 46            | axon, membrane fraction, synapse                                                                                                           | protein binding                                                                                                                                                                                                                                                                        | axon guidance, synapse organization                                                                                                                                                                                                            |
| similar to Tu translation elongation factor, mitochondrial                           | LOC100041265 | NP_001104813 | 50       | 45            | not classified                                                                                                                             | not classified                                                                                                                                                                                                                                                                         | not classified                                                                                                                                                                                                                                 |
| hydroxysteroid 11-beta dehydrogenase 2                                               | Hsd11b2      | NP_032315    | 42       | 45            | endoplasmic reticulum, microsome                                                                                                           | binding, catalytic activity, oxidoreductase activity                                                                                                                                                                                                                                   | metabolic process, oxidation reduction                                                                                                                                                                                                         |
| voltage-dependent anion channel 2                                                    | Vdac2        | NP_035825    | 32       | 45            | integral to membrane, membrane, mitochondrial inner membrane, mitochondrial outer membrane, mitochondrion, pore complex                    | nucleotide binding, voltage-gated anion channel activity                                                                                                                                                                                                                               | anion transport, ion transport, transport                                                                                                                                                                                                      |
| electron transferring flavoprotein, dehydrogenase                                    | Etfdh        | NP_080070    | 68       | 45            | integral to membrane, membrane, mitochondrial electron transfer flavoprotein complex, mitochondrial inner membrane, mitochondrion          | 4 iron, 4 sulfur cluster binding, electron-transferring-flavoprotein dehydrogenase activity, iron ion binding, iron-sulfur cluster binding, metal ion binding, molecular_function, oxidoreductase activity                                                                             | biological_process, electron transport chain, oxidation reduction, response to oxidative stress, transport                                                                                                                                     |
| PREDICTED: similar to Electron transferring flavoprotein, beta polypeptide isoform 2 | LOC100045699 | XP_001474234 | 28       | 45            | not classified                                                                                                                             | not classified                                                                                                                                                                                                                                                                         | not classified                                                                                                                                                                                                                                 |
| myosin IC isoform b                                                                  | Myo1c        | NP_001074243 | 118      | 44            | brush border, cell projection, cytoplasm, membrane, myosin complex, myosin I complex, nuclear pore, nucleus, plasma membrane, stereocilium | actin binding, ATP binding, calmodulin binding, motor activity, nucleotide binding, phospholipid binding, protein binding, protein C-terminus binding                                                                                                                                  | mRNA transport, protein transport, transmembrane transport, transport                                                                                                                                                                          |
| peroxiredoxin 3                                                                      | Prdx3        | NP_031478    | 28       | 44            | mitochondrion                                                                                                                              | antioxidant activity, identical protein binding, oxidoreductase activity, peroxidase activity, peroxiredoxin activity                                                                                                                                                                  | cell redox homeostasis, hydrogen peroxide catabolic process, maternal placenta development, myeloid cell differentiation, oxidation reduction, response to lipopolysaccharide, response to oxidative stress                                    |

| Protein Name                                                 | Gene Name | Accession No | Mw (kDa) | Peptide Count | GO Component                                                                                                                                                                                                  | GO Function                                                                                                                                                                                                                                                                     | GO Process                                                                                                                                                                                                                                                                                                                    |
|--------------------------------------------------------------|-----------|--------------|----------|---------------|---------------------------------------------------------------------------------------------------------------------------------------------------------------------------------------------------------------|---------------------------------------------------------------------------------------------------------------------------------------------------------------------------------------------------------------------------------------------------------------------------------|-------------------------------------------------------------------------------------------------------------------------------------------------------------------------------------------------------------------------------------------------------------------------------------------------------------------------------|
| isocitrate dehydrogenase 3 (NAD+), gamma                     | ldh3g     | NP_032349    | 43       | 44            | mitochondrion                                                                                                                                                                                                 | ATP binding, isocitrate dehydrogenase (NAD+) activity, magnesium ion binding, manganese ion binding, metal ion binding, NAD or NADH binding, nucleotide binding, oxidoreductase activity, oxidoreductase activity, acting on the CH-OH group of donors, NAD or NADP as acceptor | oxidation reduction, tricarboxylic acid cycle                                                                                                                                                                                                                                                                                 |
| villin 2                                                     | Ezr       | NP_033536    | 69       | 44            | apical part of cell, apical plasma membrane, cell projection, cytoplasm, cytoskeleton, extrinsic to membrane, membrane, microtubule basal body, microvillus, plasma membrane, uropod                          | binding, cytoskeletal protein binding, protein binding                                                                                                                                                                                                                          | establishment or maintenance of apical/basal cell polarity, regulation of cell shape                                                                                                                                                                                                                                          |
| NADH dehydrogenase (ubiquinone) 1 beta subcomplex, 7         | Ndubf7    | NP_080119    | 16       | 44            | membrane, mitochondrial inner membrane, mitochondrion, respiratory chain                                                                                                                                      | NADH dehydrogenase (ubiquinone) activity, NADH dehydrogenase activity                                                                                                                                                                                                           | electron transport chain, transport                                                                                                                                                                                                                                                                                           |
| succinate dehydrogenase complex, subunit B, iron sulfur (lp) | Sdhb      | NP_075863    | 32       | 43            | membrane, mitochondrial inner membrane, mitochondrion                                                                                                                                                         | 2 iron, 2 sulfur cluster binding, 3 iron, 4 sulfur cluster binding, 4 iron, 4 sulfur cluster binding, electron carrier activity, iron ion binding, iron-sulfur cluster binding, metal ion binding, oxidoreductase activity, succinate dehydrogenase (ubiquinone) activity       | electron transport chain, oxidation reduction, transport, tricarboxylic acid cycle                                                                                                                                                                                                                                            |
| myosin VI                                                    | Myo6      | NP_001034635 | 146      | 41            | axon, cell projection, cell soma, coated pit, cytoplasm, cytoplasmic vesicle, Golgi apparatus, membrane, myosin complex, nucleus, perinuclear region of cytoplasm, plasma membrane, synapse, vesicle membrane | actin binding, actin filament binding, ATP binding, calmodulin binding, motor activity, nucleotide binding, protein binding                                                                                                                                                     | auditory receptor cell differentiation, dendrite development, endocytosis, glutamate secretion, inner ear development, inner ear morphogenesis, locomotory behavior, protein targeting, protein transport, regulation of synaptic plasticity, sensory perception of sound, synapse assembly, synaptic transmission, transport |
| keratin 18                                                   | Krt18     | NP_034794    | 48       | 41            | intermediate filament                                                                                                                                                                                         | protein binding, structural molecule activity                                                                                                                                                                                                                                   | apoptosis, tumor necrosis factor-mediated signaling pathway                                                                                                                                                                                                                                                                   |
| tubulin, beta 5                                              | Tubb5     | NP_035785    | 50       | 41            | cytosol, microtubule, protein complex, tubulin complex                                                                                                                                                        | GTP binding, GTPase activity, nucleotide binding, structural constituent of cytoskeleton, structural molecule activity                                                                                                                                                          | microtubule-based movement, microtubule-based process, protein polymerization, spindle assembly                                                                                                                                                                                                                               |

| Protein Name                                | Gene Name | Accession No | Mw (kDa) | Peptide Count | GO Component                                                 | GO Function                                                                                                                                                                                                                                                                                                                          | GO Process                                                                                                                                                                                                                                                                                                  |
|---------------------------------------------|-----------|--------------|----------|---------------|--------------------------------------------------------------|--------------------------------------------------------------------------------------------------------------------------------------------------------------------------------------------------------------------------------------------------------------------------------------------------------------------------------------|-------------------------------------------------------------------------------------------------------------------------------------------------------------------------------------------------------------------------------------------------------------------------------------------------------------|
| adenylate kinase 3                          | Ak3       | NP_067274    | 25       | 41            | mitochondrion                                                | adenylate kinase activity, ATP binding, GTP binding, kinase activity, nucleobase, nucleoside, nucleotide kinase activity, nucleoside triphosphate adenylate kinase activity, nucleotide binding, nucleotide kinase activity, phosphotransferase activity, phosphate group as acceptor, transferase activity                          | nucleobase, nucleoside, nucleotide and nucleic acid metabolic process                                                                                                                                                                                                                                       |
| gelsolin                                    | Gsn       | NP_666232    | 86       | 41            | cytoplasm, cytoskeleton, extracellular region, lamellipodium | actin binding, calcium ion binding                                                                                                                                                                                                                                                                                                   | actin filament capping, vesicle-mediated transport                                                                                                                                                                                                                                                          |
| acyl-Coenzyme A dehydrogenase, medium chain | Acadm     | NP_031408    | 46       | 40            | mitochondrion                                                | acyl-CoA dehydrogenase activity, electron carrier activity, FAD binding, oxidoreductase activity, oxidoreductase activity, acting on the CH-CH group of donors                                                                                                                                                                       | cardiac muscle cell differentiation, carnitine metabolic process, fatty acid metabolic process, heart development, lipid metabolic process, liver development, metabolic process, organic acid metabolic process, oxidation reduction, post-embryonic development, response to cold, response to starvation |
| cytochrome c, somatic                       | Cycc      | NP_031834    | 12       | 40            | cytosol, mitochondrion, respiratory chain, soluble fraction  | electron carrier activity, heme binding, iron ion binding, metal ion binding                                                                                                                                                                                                                                                         | activation of caspase activity by cytochrome c, apoptosis, electron transport chain, hydrogen peroxide metabolic process, positive regulation of apoptosis, transport                                                                                                                                       |
| choline dehydrogenase                       | Chdh      | NP_780552    | 66       | 40            | mitochondrial inner membrane, mitochondrion                  | choline dehydrogenase activity, FAD binding, molecular function, oxidoreductase activity, oxidoreductase activity, acting on CH-OH group of donors                                                                                                                                                                                   | alcohol metabolic process, biological process, glycine betaine biosynthetic process from choline, oxidation reduction                                                                                                                                                                                       |
| transketolase                               | Tkt       | NP_033414    | 68       | 39            | not classified                                               | calcium ion binding, catalytic activity, metal ion binding, transferase activity, transketolase activity                                                                                                                                                                                                                             | metabolic process, regulation of growth                                                                                                                                                                                                                                                                     |
| heterogeneous nuclear ribonucleoprotein U   | Hnmpu     | NP_058085    | 88       | 39            | ribonucleoprotein complex                                    | nucleic acid binding                                                                                                                                                                                                                                                                                                                 | not classified                                                                                                                                                                                                                                                                                              |
| protease, serine, 15                        | Lonp1     | NP_083058    | 106      | 39            | mitochondrion                                                | ATP binding, ATPase activity, ATP-dependent peptidase activity, DNA binding, hydrolase activity, mitochondrial light strand promoter anti-sense binding, nucleoside-triphosphatase activity, nucleotide binding, peptidase activity, serine-type endopeptidase activity, serine-type peptidase activity, single-stranded DNA binding | ATP catabolic process, proteolysis                                                                                                                                                                                                                                                                          |

| Protein Name                                                                              | Gene Name    | Accession No | Mw (kDa) | Peptide Count | GO Component                                                             | GO Function                                                                                                                                                                                                                                                                                                           | GO Process                                                                           |
|-------------------------------------------------------------------------------------------|--------------|--------------|----------|---------------|--------------------------------------------------------------------------|-----------------------------------------------------------------------------------------------------------------------------------------------------------------------------------------------------------------------------------------------------------------------------------------------------------------------|--------------------------------------------------------------------------------------|
| NADH dehydrogenase (ubiquinone) Fe-S protein 2                                            | Ndufs2       | NP_694704    | 53       | 39            | membrane, mitochondrial inner membrane, mitochondrion, respiratory chain | 4 iron, 4 sulfur cluster binding, electron carrier activity, iron ion binding, iron-sulfur cluster binding, metal ion binding, NAD or NADH binding, NADH dehydrogenase (ubiquinone) activity, NADH dehydrogenase activity, oxidoreductase activity, oxidoreductase activity, acting on NADH or NADPH, quinone binding | biological_process, electron transport chain, oxidation reduction, transport         |
| PREDICTED: hypothetical protein                                                           | LOC100046199 | XP_001475883 | 21       | 39            | not classified                                                           | not classified                                                                                                                                                                                                                                                                                                        | not classified                                                                       |
| phosphoglycerate mutase 2                                                                 | Pgam2        | NP_061358    | 29       | 38            | not classified                                                           | 2,3-bisphospho-D-glycerate 2-phosphohydrolase activity, bisphosphoglycerate mutase activity, catalytic activity, hydrolase activity, intramolecular transferase activity, phosphotransferases, isomerase activity, phosphoglycerate mutase activity                                                                   | glycolysis, metabolic process                                                        |
| phosphoglycerate mutase 1                                                                 | Pgam1        | NP_075907    | 29       | 38            | not classified                                                           | 2,3-bisphospho-D-glycerate 2-phosphohydrolase activity, bisphosphoglycerate mutase activity, catalytic activity, hydrolase activity, intramolecular transferase activity, phosphotransferases, isomerase activity, phosphoglycerate mutase activity                                                                   | glycolysis, metabolic process                                                        |
| PREDICTED: hypothetical protein                                                           | EG626058     | XP_895712    | 22       | 38            | not classified                                                           | not classified                                                                                                                                                                                                                                                                                                        | not classified                                                                       |
| PREDICTED: similar to ubiquitin A-52 residue ribosomal protein fusion product 1 isoform 2 | LOC629750    | XP_899768    | 15       | 38            | not classified                                                           | not classified                                                                                                                                                                                                                                                                                                        | not classified                                                                       |
| keratin complex 2, basic, gene 1                                                          | Krt1         | NP_032499    | 66       | 37            | intermediate filament, keratin filament, membrane, plasma membrane       | structural molecule activity                                                                                                                                                                                                                                                                                          | not classified                                                                       |
| annexin A5                                                                                | Anxa5        | NP_033803    | 36       | 37            | not classified                                                           | calcium ion binding, calcium-dependent phospholipid binding, eukaryotic cell surface binding, protein binding                                                                                                                                                                                                         | blood coagulation, negative regulation of coagulation, response to organic substance |
| hydroxyacyl-Coenzyme A dehydrogenase type II                                              | Hsd17b10     | NP_058043    | 27       | 37            | endoplasmic reticulum, mitochondrial inner membrane, mitochondrion       | 3-hydroxy-2-methylbutyryl-CoA dehydrogenase activity, 3-hydroxyacyl-CoA dehydrogenase activity, binding, catalytic activity, oxidoreductase activity                                                                                                                                                                  | metabolic process, oxidation reduction, tRNA processing                              |

| Protein Name                                           | Gene Name | Accession No | Mw (kDa) | Peptide Count | GO Component                                                                                                                                                                                  | GO Function                                                                                                                                                                                                                                                           | GO Process                                                                                                                                                                                                                                                                  |
|--------------------------------------------------------|-----------|--------------|----------|---------------|-----------------------------------------------------------------------------------------------------------------------------------------------------------------------------------------------|-----------------------------------------------------------------------------------------------------------------------------------------------------------------------------------------------------------------------------------------------------------------------|-----------------------------------------------------------------------------------------------------------------------------------------------------------------------------------------------------------------------------------------------------------------------------|
| NADH dehydrogenase (ubiquinone) Fe-S protein 7         | Ndufs7    | NP_083548    | 25       | 37            | mitochondrial inner membrane, mitochondrion, respiratory chain                                                                                                                                | 4 iron, 4 sulfur cluster binding, iron ion binding, iron-sulfur cluster binding, metal ion binding, NADH dehydrogenase (ubiquinone) activity, NADH dehydrogenase activity, oxidoreductase activity, oxidoreductase activity, acting on NADH or NADPH, quinone binding | biological_process, electron transport chain, oxidation reduction, transport                                                                                                                                                                                                |
| methylcrotonoyl-Coenzyme A carboxylase 2 (beta)        | Mccc2     | NP_084302    | 61       | 37            | mitochondrion                                                                                                                                                                                 | ATP binding, ligase activity, methylcrotonoyl-CoA carboxylase activity, nucleotide binding                                                                                                                                                                            | not classified                                                                                                                                                                                                                                                              |
| low density lipoprotein receptor-related protein 2     | Lrp2      | NP_001074557 | 519      | 36            | apical part of cell, apical plasma membrane, brush border, coated pit, endocytic vesicle, endoplasmic reticulum, endosome, Golgi apparatus, integral to membrane, membrane, membrane fraction | calcium ion binding, protein binding, receptor activity, SH3 domain binding                                                                                                                                                                                           | cell proliferation, endocytosis, forebrain development, receptor-mediated endocytosis, vitamin metabolic process                                                                                                                                                            |
| H1 histone family, member 0                            | H1f0      | NP_032223    | 21       | 36            | chromosome, nucleosome, nucleus                                                                                                                                                               | DNA binding                                                                                                                                                                                                                                                           | nucleosome assembly                                                                                                                                                                                                                                                         |
| NADH dehydrogenase (ubiquinone) 1 alpha subcomplex, 13 | Ndufa13   | NP_075801    | 17       | 36            | integral to membrane, membrane, mitochondrial inner membrane, mitochondrion, nucleus, respiratory chain                                                                                       | ATP binding                                                                                                                                                                                                                                                           | apoptosis, electron transport chain, transport                                                                                                                                                                                                                              |
| serum deprivation response                             | Sdpr      | NP_620080    | 47       | 36            | cytoplasm, membrane                                                                                                                                                                           | lipid binding, protein binding                                                                                                                                                                                                                                        | positive regulation of transcription from RNA polymerase II promoter                                                                                                                                                                                                        |
| cadherin 16                                            | Cdh16     | NP_031689    | 90       | 35            | integral to membrane, membrane, plasma membrane                                                                                                                                               | calcium ion binding, protein binding                                                                                                                                                                                                                                  | cell adhesion, homophilic cell adhesion                                                                                                                                                                                                                                     |
| carnitine acetyltransferase                            | Crat      | NP_031786    | 71       | 35            | endoplasmic reticulum, membrane, mitochondrial inner membrane, mitochondrion, peroxisome                                                                                                      | acyltransferase activity, carnitine O-acetyltransferase activity, transferase activity                                                                                                                                                                                | fatty acid metabolic process, lipid metabolic process, transport                                                                                                                                                                                                            |
| eukaryotic translation elongation factor 2             | Eef2      | NP_031933    | 95       | 35            | cytoplasm, ribonucleoprotein complex                                                                                                                                                          | GTP binding, GTPase activity, nucleotide binding, translation elongation factor activity                                                                                                                                                                              | translation                                                                                                                                                                                                                                                                 |
| NADH dehydrogenase (ubiquinone) 1 alpha subcomplex, 4  | Ndufa4    | NP_035016    | 9        | 35            | membrane, mitochondrial inner membrane, mitochondrion, respiratory chain                                                                                                                      | not classified                                                                                                                                                                                                                                                        | electron transport chain, transport                                                                                                                                                                                                                                         |
| calreticulin                                           | Calr      | NP_031617    | 48       | 34            | endoplasmic reticulum, external side of plasma membrane, extracellular space, microsome                                                                                                       | calcium ion binding, metal ion binding, sugar binding, unfolded protein binding, zinc ion binding                                                                                                                                                                     | cortical actin cytoskeleton organization, protein folding, regulation of meiosis                                                                                                                                                                                            |
| glutamate oxaloacetate transaminase 1, soluble         | Got1      | NP_034454    | 46       | 34            | cytoplasm, cytosol                                                                                                                                                                            | catalytic activity, L-aspartate:2-oxoglutarate aminotransferase activity, phosphatidylserine decarboxylase activity, pyridoxal phosphate binding, transaminase activity, transferase activity, transferase activity, transferring nitrogenous groups                  | aspartate biosynthetic process, biosynthetic process, cellular amino acid metabolic process, fatty acid homeostasis, glutamate catabolic process to 2-oxoglutarate, glutamate catabolic process to aspartate, glycerol biosynthetic process, oxaloacetate metabolic process |

| Protein Name                              | Gene Name | Accession No | Mw (kDa) | Peptide Count | GO Component                                                                                                                        | GO Function                                                                                                                                                                       | GO Process                                                                                                                                                                                                                                                                                                                          |
|-------------------------------------------|-----------|--------------|----------|---------------|-------------------------------------------------------------------------------------------------------------------------------------|-----------------------------------------------------------------------------------------------------------------------------------------------------------------------------------|-------------------------------------------------------------------------------------------------------------------------------------------------------------------------------------------------------------------------------------------------------------------------------------------------------------------------------------|
| lactate dehydrogenase A                   | Ldha      | NP_034829    | 36       | 34            | cytoplasm, cytosol, flagellum                                                                                                       | catalytic activity, L-lactate dehydrogenase activity, oxidoreductase activity, acting on the CH-OH group of donors, NAD or NADP as acceptor, protein binding                      | anaerobic glycolysis, carbohydrate metabolic process, cellular carbohydrate metabolic process, cellular response to extracellular stimulus, glycolysis, oxidation reduction                                                                                                                                                         |
| tumor rejection antigen gp96              | Hsp90b1   | NP_035761    | 92       | 34            | endoplasmic reticulum, plasma membrane part                                                                                         | ATP binding, calcium ion binding, low-density lipoprotein receptor binding, nucleotide binding, unfolded protein binding                                                          | protein folding, response to stress                                                                                                                                                                                                                                                                                                 |
| destrin                                   | Dstn      | NP_062745    | 19       | 34            | cortical actin cytoskeleton, cytoplasm, intracellular                                                                               | actin binding                                                                                                                                                                     | cell motion, cytokinesis, positive regulation of actin filament depolymerization                                                                                                                                                                                                                                                    |
| vacuolar H+ ATPase E1                     | Atp6v1e1  | NP_031536    | 26       | 33            | apical plasma membrane cytoplasm, cytosol, endosome, mitochondrion, proton-transporting two-sector ATPase complex, catalytic domain | hydrogen-exporting ATPase activity, phosphorylative mechanism, hydrolase activity, proton-transporting ATPase activity, rotational mechanism                                      | ATP hydrolysis coupled proton transport, ATP synthesis coupled proton transport, ion transport, proton transport, transport                                                                                                                                                                                                         |
| B-cell receptor-associated protein 37     | Phb2      | NP_031557    | 33       | 33            | cytoplasm, membrane, mitochondrial inner membrane, mitochondrion, nucleus                                                           | protein binding, receptor activity, specific transcriptional repressor activity                                                                                                   | mammary gland alveolus development, mammary gland branching involved in thelarche, negative regulation of estrogen receptor signaling pathway, negative regulation of mammary gland epithelial cell proliferation, regulation of branching involved in mammary gland duct morphogenesis, regulation of transcription, transcription |
| cytochrome c oxidase, subunit Va          | Cox5a     | NP_031773    | 16       | 33            | membrane, mitochondrial inner membrane, mitochondrion                                                                               | cytochrome-c oxidase activity, iron ion binding, metal ion binding                                                                                                                | not classified                                                                                                                                                                                                                                                                                                                      |
| prothymosin alpha                         | Ptma      | NP_032998    | 12       | 33            | nucleus                                                                                                                             | not classified                                                                                                                                                                    | not classified                                                                                                                                                                                                                                                                                                                      |
| microsomal glutathione S-transferase 3    | Mgst3     | NP_079845    | 17       | 33            | cellular_component, endoplasmic reticulum, integral to membrane, membrane, microsome                                                | glutathione transferase activity, molecular_function, transferase activity                                                                                                        | biological_process                                                                                                                                                                                                                                                                                                                  |
| acyl-Coenzyme A dehydrogenase, long-chain | Acadl     | NP_031407    | 48       | 32            | mitochondrion                                                                                                                       | acyl-CoA dehydrogenase activity, electron carrier activity, FAD binding, long-chain-acyl-CoA dehydrogenase activity, oxidoreductase activity, acting on the CH-CH group of donors | fatty acid metabolic process, lipid metabolic process, metabolic process, oxidation reduction                                                                                                                                                                                                                                       |
| RAB1, member RAS oncogene family          | Rab1      | NP_033022    | 23       | 32            | endoplasmic reticulum, Golgi apparatus                                                                                              | GTP binding, nucleotide binding                                                                                                                                                   | ER to Golgi vesicle-mediated transport, intracellular protein transport, protein transport, small GTPase mediated signal transduction, transport, vesicle-mediated transport                                                                                                                                                        |

| Protein Name                                                                 | Gene Name | Accession No | Mw (kDa) | Peptide Count | GO Component                                                                                                                   | GO Function                                                                                                                                                                                           | GO Process                                                                                                                                                                                                                 |
|------------------------------------------------------------------------------|-----------|--------------|----------|---------------|--------------------------------------------------------------------------------------------------------------------------------|-------------------------------------------------------------------------------------------------------------------------------------------------------------------------------------------------------|----------------------------------------------------------------------------------------------------------------------------------------------------------------------------------------------------------------------------|
| ubiquitin-activating enzyme E1                                               | Uba1      | NP_033483    | 118      | 32            | not classified                                                                                                                 | ATP binding, binding, catalytic activity, ligase activity, nucleotide binding, small protein activating enzyme activity                                                                               | metabolic process, modification-dependent protein catabolic process, protein modification process                                                                                                                          |
| prolyl 4-hydroxylase, beta polypeptide                                       | P4hb      | NP_035162    | 57       | 32            | endoplasmic reticulum, membrane, microsome, plasma membrane                                                                    | isomerase activity, procollagen-proline 4-dioxygenase activity, protein disulfide isomerase activity                                                                                                  | cell redox homeostasis, peptidyl-proline hydroxylation to 4-hydroxy-L-proline                                                                                                                                              |
| Rhesus blood group-associated B glycoprotein                                 | Rhbg      | NP_067350    | 50       | 32            | basolateral plasma membrane, cytoplasmic vesicle, integral to membrane, integral to plasma membrane, membrane, plasma membrane | ammonia transporter activity, ammonium transmembrane transporter activity                                                                                                                             | ammonium transport, transport                                                                                                                                                                                              |
| LPS-responsive beige-like anchor isoform alpha                               | Lrba      | NP_109620    | 317      | 32            | cytoplasmic membrane-bounded vesicle                                                                                           | protein kinase A binding                                                                                                                                                                              | endosome transport, protein localization, signal transduction                                                                                                                                                              |
| es1 protein                                                                  | D10Jhu81e | NP_613067    | 28       | 32            | centriole, mitochondrion                                                                                                       | molecular_function                                                                                                                                                                                    | biological_process                                                                                                                                                                                                         |
| keratin 86                                                                   | Krt86     | NP_034797    | 53       | 31            | intermediate filament, keratin filament                                                                                        | structural molecule activity                                                                                                                                                                          | not classified                                                                                                                                                                                                             |
| proline dehydrogenase                                                        | Prodh     | NP_035302    | 68       | 31            | mitochondrial inner membrane, mitochondrion                                                                                    | oxidoreductase activity, proline dehydrogenase activity                                                                                                                                               | glutamate biosynthetic process, oxidation reduction, proline catabolic process, proline metabolic process                                                                                                                  |
| cytochrome c oxidase, subunit VIb polypeptide 1                              | Cox6b1    | NP_079904    | 10       | 31            | mitochondrial inner membrane, mitochondrion                                                                                    | cytochrome-c oxidase activity                                                                                                                                                                         | not classified                                                                                                                                                                                                             |
| sorting and assembly machinery component 50 homolog                          | Samm50    | NP_848729    | 52       | 31            | integral to membrane, membrane, mitochondrial inner membrane, mitochondrial outer membrane, mitochondrion, outer membrane      | not classified                                                                                                                                                                                        | not classified                                                                                                                                                                                                             |
| dodecenoyl-Coenzyme A delta isomerase (3,2 trans-enoyl-Coenzyme A isomerase) | Dci       | NP_034153    | 32       | 30            | mitochondrial inner membrane, mitochondrion                                                                                    | catalytic activity, dodecenoyl-CoA delta-isomerase activity, isomerase activity                                                                                                                       | fatty acid beta-oxidation, fatty acid metabolic process, lipid metabolic process, metabolic process                                                                                                                        |
| isovaleryl coenzyme A dehydrogenase                                          | Ivd       | NP_062800    | 46       | 30            | mitochondrion                                                                                                                  | acyl-CoA dehydrogenase activity, electron carrier activity, FAD binding, isovaleryl-CoA dehydrogenase activity, oxidoreductase activity, oxidoreductase activity, acting on the CH-CH group of donors | metabolic process, oxidation reduction                                                                                                                                                                                     |
| heterogeneous nuclear ribonucleoprotein K                                    | Hnnpk     | NP_079555    | 51       | 30            | cytoplasm, nucleus, ribonucleoprotein complex, spliceosomal complex                                                            | DNA binding, nucleic acid binding, protein binding, RNA binding                                                                                                                                       | mRNA processing, RNA splicing                                                                                                                                                                                              |
| heat shock protein 4                                                         | Hspa4     | NP_032326    | 94       | 29            | cytoplasm                                                                                                                      | ATP binding, nucleotide binding                                                                                                                                                                       | response to stress                                                                                                                                                                                                         |
| branched chain aminotransferase 2, mitochondrial                             | Bcat2     | NP_033867    | 44       | 29            | mitochondrion                                                                                                                  | branched-chain-amino-acid transaminase activity, catalytic activity, transaminase activity, transferase activity                                                                                      | branched chain family amino acid biosynthetic process, branched chain family amino acid catabolic process, branched chain family amino acid metabolic process, cellular amino acid biosynthetic process, metabolic process |
| filamin, alpha                                                               | Fina      | NP_034357    | 281      | 29            | cytoplasm, cytoskeleton, trans-Golgi network                                                                                   | actin binding, protein binding, protein kinase C binding                                                                                                                                              | early endosome to late endosome transport                                                                                                                                                                                  |

| Protein Name                                                          | Gene Name | Accession No | Mw (kDa) | Peptide Count | GO Component                                                                          | GO Function                                                                                                                                                                          | GO Process                                                                                                                      |
|-----------------------------------------------------------------------|-----------|--------------|----------|---------------|---------------------------------------------------------------------------------------|--------------------------------------------------------------------------------------------------------------------------------------------------------------------------------------|---------------------------------------------------------------------------------------------------------------------------------|
| upregulated during skeletal muscle growth 5                           | Usmg5     | NP_075700    | 6        | 29            | integral to membrane, membrane, mitochondrial inner membrane, mitochondrion           | not classified                                                                                                                                                                       | not classified                                                                                                                  |
| ribophorin I                                                          | Rpn1      | NP_598694    | 69       | 29            | endoplasmic reticulum, endoplasmic reticulum membrane, integral to membrane, membrane | dolichyl-diphosphooligosaccharid e-protein glycotransferase activity, transferase activity                                                                                           | protein amino acid glycosylation                                                                                                |
| succinate dehydrogenase complex, subunit C, integral membrane protein | Sdhc      | NP_079597    | 18       | 28            | integral to membrane, membrane, mitochondrial inner membrane, mitochondrion           | electron carrier activity, iron ion binding, metal ion binding, succinate dehydrogenase activity                                                                                     | electron transport chain, transport, tricarboxylic acid cycle                                                                   |
| nucleoside-diphosphate kinase 2                                       | Nme2      | NP_001070997 | 17       | 27            | cytoplasm, membrane, mitochondrion, plasma membrane                                   | ATP binding, kinase activity, magnesium ion binding, metal ion binding, nucleoside diphosphate kinase activity, nucleotide binding, transferase activity                             | CTP biosynthetic process, GTP biosynthetic process, nucleotide metabolic process, UTP biosynthetic process                      |
| DEAH (Asp-Glu-Ala-His) box polypeptide 9                              | Dhx9      | NP_031868    | 150      | 27            | intracellular, nucleolus, nucleus, ribonucleoprotein complex                          | ATP binding, ATP-dependent helicase activity, DNA binding, double-stranded RNA binding, helicase activity, hydrolase activity, nucleic acid binding, nucleotide binding, RNA binding | cellular response to heat                                                                                                       |
| heat shock 70kDa protein 1B                                           | Hspa1b    | NP_034608    | 70       | 27            | intracellular, mitochondrial matrix, mitochondrion                                    | ATP binding, nucleotide binding, protein binding                                                                                                                                     | anti-apoptosis, DNA repair, negative regulation of caspase activity, response to heat, response to stress, telomere maintenance |
| peptidylprolyl isomerase B                                            | Ppib      | NP_035279    | 24       | 27            | endoplasmic reticulum                                                                 | isomerase activity, peptide binding, peptidyl-prolyl cis-trans isomerase activity                                                                                                    | protein folding                                                                                                                 |
| succinate-Coenzyme A ligase, ADP-forming, beta subunit                | Sucla2    | NP_035636    | 50       | 27            | mitochondrion                                                                         | ATP binding, catalytic activity, ligase activity, nucleotide binding, succinate-CoA ligase (ADP-forming) activity, succinate-CoA ligase activity                                     | metabolic process, tricarboxylic acid cycle                                                                                     |
| histone cluster 1, H1e                                                | Hist1h1e  | NP_056602    | 22       | 27            | chromosome, nucleosome, nucleus                                                       | DNA binding, protein binding                                                                                                                                                         | nucleosome assembly, nucleosome positioning                                                                                     |



| Protein Name                                                         | Gene Name | Accession No | Mw (kDa) | Peptide Count | GO Component                                                                                                                                                             | GO Function                                                                                                                                              | GO Process                                                                                                                                                                                                                                                                                                                                                                                                                                                                                                                                                                                              |
|----------------------------------------------------------------------|-----------|--------------|----------|---------------|--------------------------------------------------------------------------------------------------------------------------------------------------------------------------|----------------------------------------------------------------------------------------------------------------------------------------------------------|---------------------------------------------------------------------------------------------------------------------------------------------------------------------------------------------------------------------------------------------------------------------------------------------------------------------------------------------------------------------------------------------------------------------------------------------------------------------------------------------------------------------------------------------------------------------------------------------------------|
| ras homolog gene family, member A                                    | Rhoa      | NP_058082    | 22       | 27            | cytoplasm, cytoskeleton, cytosol, intracellular, membrane, nucleus, plasma membrane                                                                                      | GTP binding, GTPase activity, nucleotide binding, protein binding                                                                                        | actin cytoskeleton organization, androgen receptor signaling pathway, cell adhesion, cell differentiation, cell morphogenesis, cell-matrix adhesion, integrin-mediated signaling pathway, negative regulation of neuron apoptosis, negative regulation of steroid hormone receptor signaling pathway, positive regulation of neuron differentiation, positive regulation of stress fiber formation, regulation of transcription from RNA polymerase II promoter, Rho protein signal transduction, skeletal muscle tissue development, small GTPase mediated signal transduction, stress fiber formation |
| leucine zipper-EF-hand containing transmembrane protein 1            | Letm1     | NP_062668    | 83       | 27            | integral to membrane, membrane, mitochondrial inner membrane, mitochondrion                                                                                              | calcium ion binding                                                                                                                                      | not classified                                                                                                                                                                                                                                                                                                                                                                                                                                                                                                                                                                                          |
| vinculin                                                             | Vcl       | NP_033528    | 117      | 26            | actin cytoskeleton, adherens junction, cell junction, cell-cell junction, costamere, cytoplasm, cytoskeleton, fascia adherens, focal adhesion, membrane, plasma membrane | actin binding, protein binding, structural molecule activity                                                                                             | cell adhesion, lamellipodium assembly, regulation of cell migration                                                                                                                                                                                                                                                                                                                                                                                                                                                                                                                                     |
| voltage-dependent anion channel 3                                    | Vdac3     | NP_035826    | 31       | 26            | integral to membrane, membrane, mitochondrial inner membrane, mitochondrial outer membrane, mitochondrion, pore complex                                                  | nucleotide binding, voltage-gated anion channel activity                                                                                                 | anion transport, behavioral fear response, ion transport, learning, nerve-nerve synaptic transmission, synaptic transmission, transport                                                                                                                                                                                                                                                                                                                                                                                                                                                                 |
| RAB5C, member RAS oncogene family                                    | Rab5c     | NP_077776    | 23       | 26            | endocytic vesicle, endosome, membrane, plasma membrane                                                                                                                   | GTP binding, GTPase activity, nucleotide binding                                                                                                         | endosome organization, protein transport, regulation of endocytosis, small GTPase mediated signal transduction, transport                                                                                                                                                                                                                                                                                                                                                                                                                                                                               |
| TNF receptor-associated protein 1                                    | Trap1     | NP_080784    | 80       | 26            | mitochondrion                                                                                                                                                            | ATP binding, nucleotide binding, unfolded protein binding                                                                                                | protein folding, response to stress                                                                                                                                                                                                                                                                                                                                                                                                                                                                                                                                                                     |
| transgelin 2                                                         | Tagln2    | NP_848713    | 22       | 26            | not classified                                                                                                                                                           | not classified                                                                                                                                           | muscle organ development                                                                                                                                                                                                                                                                                                                                                                                                                                                                                                                                                                                |
| cytochrome c oxidase subunit I                                       | COX1      | NP_904330    | 57       | 26            | integral to membrane, membrane, mitochondrial inner membrane, mitochondrion, respiratory chain                                                                           | copper ion binding, cytochrome-c oxidase activity, electron carrier activity, heme binding, iron ion binding, metal ion binding, oxidoreductase activity | aerobic respiration, electron transport chain, oxidation reduction, transport                                                                                                                                                                                                                                                                                                                                                                                                                                                                                                                           |
| PREDICTED: similar to 3-methylcrotonyl-CoA carboxylase alpha subunit | LOC677576 | XP_001005025 | 28       | 26            | not classified                                                                                                                                                           | not classified                                                                                                                                           | not classified                                                                                                                                                                                                                                                                                                                                                                                                                                                                                                                                                                                          |
| NADH dehydrogenase (ubiquinone) 1 beta subcomplex, 6                 | Ndubf6    | NP_001028477 | 16       | 25            | integral to membrane, membrane, mitochondrial inner membrane, mitochondrion, respiratory chain                                                                           | not classified                                                                                                                                           | electron transport chain, transport                                                                                                                                                                                                                                                                                                                                                                                                                                                                                                                                                                     |

| Protein Name                                                                              | Gene Name | Accession No | Mw (kDa) | Peptide Count | GO Component                                                                                                          | GO Function                                                                                                                                                                                                                                                                      | GO Process                                                              |
|-------------------------------------------------------------------------------------------|-----------|--------------|----------|---------------|-----------------------------------------------------------------------------------------------------------------------|----------------------------------------------------------------------------------------------------------------------------------------------------------------------------------------------------------------------------------------------------------------------------------|-------------------------------------------------------------------------|
| myosin, light polypeptide 6, alkali, smooth muscle and non-muscle                         | Myl6      | NP_034990    | 17       | 25            | myosin complex, unconventional myosin complex                                                                         | calcium ion binding, motor activity, structural constituent of muscle                                                                                                                                                                                                            | muscle filament sliding, skeletal muscle tissue development             |
| tyrosine 3-monooxygenase/tryptophan 5-monooxygenase activation protein, zeta polypeptide  | Ywhaz     | NP_035870    | 28       | 25            | cytoplasm, mitochondrion, nucleus                                                                                     | not classified                                                                                                                                                                                                                                                                   | protein targeting                                                       |
| annexin A4                                                                                | Anxa4     | NP_038499    | 36       | 25            | apical plasma membrane                                                                                                | calcium ion binding, calcium-dependent phospholipid binding                                                                                                                                                                                                                      | kidney development                                                      |
| keratin 14                                                                                | Krt14     | NP_058654    | 53       | 25            | cytoplasm, intermediate filament, keratin filament, nucleus                                                           | protein binding, structural molecule activity                                                                                                                                                                                                                                    | not classified                                                          |
| RAB11a, member RAS oncogene family                                                        | Rab11a    | NP_059078    | 24       | 25            | endosome, membrane, plasma membrane, trans-Golgi network                                                              | GTP binding, nucleotide binding                                                                                                                                                                                                                                                  | protein transport, small GTPase mediated signal transduction, transport |
| selenium binding protein 2                                                                | Selenbp2  | NP_062287    | 53       | 25            | cytoplasm, membrane, nucleus                                                                                          | selenium binding                                                                                                                                                                                                                                                                 | protein transport, transport                                            |
| succinate-CoA ligase, GDP-forming, alpha subunit                                          | Suclg1    | NP_063932    | 35       | 25            | mitochondrial inner membrane, mitochondrion                                                                           | ATP citrate synthase activity, binding, catalytic activity, GTP binding, ligase activity, nucleotide binding, succinate-CoA ligase (ADP-forming) activity, succinate-CoA ligase (GDP-forming) activity                                                                           | metabolic process, tricarboxylic acid cycle                             |
| ATP synthase, H <sup>+</sup> transporting, mitochondrial F0 complex, subunit f, isoform 2 | Atp5j2    | NP_065607    | 10       | 25            | membrane, mitochondrial inner membrane, mitochondrion, proton-transporting ATP synthase complex, coupling factor F(o) | not classified                                                                                                                                                                                                                                                                   | ATP biosynthetic process, ion transport, proton transport, transport    |
| ubiquinol-cytochrome c reductase, Rieske iron-sulfur polypeptide 1                        | Uqcrcf1   | NP_079986    | 29       | 25            | integral to membrane, membrane, mitochondrial inner membrane, mitochondrion, respiratory chain                        | 2 iron, 2 sulfur cluster binding, electron carrier activity, iron ion binding, iron-sulfur cluster binding, metal ion binding, oxidoreductase activity, oxidoreductase activity, acting on diphenols and related substances as donors, ubiquinol-cytochrome-c reductase activity | electron transport chain, oxidation reduction, transport                |
| myosin ID                                                                                 | Myo1d     | NP_796364    | 116      | 25            | myosin complex                                                                                                        | actin binding, ATP binding, calmodulin binding, motor activity, nucleotide binding                                                                                                                                                                                               | not classified                                                          |
| annexin A6 isoform b                                                                      | Anxa6     | NP_001103681 | 75       | 24            | cytoplasm, perinuclear region of cytoplasm                                                                            | calcium ion binding, calcium-dependent phospholipid binding                                                                                                                                                                                                                      | calcium ion transport, regulation of muscle contraction                 |
| alpha glucosidase 2 alpha neutral subunit                                                 | Ganab     | NP_032086    | 109      | 24            | alpha-glucosidase II complex, endoplasmic reticulum, Golgi apparatus                                                  | glucan 1,3-alpha-glucosidase activity, glucosidase activity, hydrolase activity, hydrolase activity, hydrolyzing O-glycosyl compounds, protein binding                                                                                                                           | carbohydrate metabolic process, N-glycan processing                     |
| dihydrolipoamide branched chain transacylase E2                                           | Dbt       | NP_034152    | 53       | 24            | mitochondrion                                                                                                         | acyltransferase activity, cofactor binding, dihydrolipoyllysine-residue (2-methylpropanoyl)transferase activity, lipoic acid binding, protein binding, transferase activity                                                                                                      | acyl-CoA biosynthetic process, metabolic process                        |

| Protein Name                                      | Gene Name    | Accession No | Mw (kDa) | Peptide Count | GO Component                                                                                 | GO Function                                                                                                                                                                                                                                                                     | GO Process                                                                                                                                |
|---------------------------------------------------|--------------|--------------|----------|---------------|----------------------------------------------------------------------------------------------|---------------------------------------------------------------------------------------------------------------------------------------------------------------------------------------------------------------------------------------------------------------------------------|-------------------------------------------------------------------------------------------------------------------------------------------|
| acyl-Coenzyme A oxidase 1, palmitoyl              | Acox1        | NP_056544    | 75       | 24            | cytoplasm, mitochondrion, peroxisomal membrane, peroxisome                                   | acyl-CoA dehydrogenase activity, acyl-CoA oxidase activity, electron carrier activity, FAD binding, oxidoreductase activity, oxidoreductase activity, acting on the CH-CH group of donors                                                                                       | fatty acid beta-oxidation, fatty acid metabolic process, lipid metabolic process, metabolic process, oxidation reduction, spermatogenesis |
| abhydrolase domain containing 14b                 | Abhd14b      | NP_083907    | 22       | 24            | cytoplasm, nucleus                                                                           | hydrolase activity                                                                                                                                                                                                                                                              | not classified                                                                                                                            |
| NADH dehydrogenase (ubiquinone) Fe-S protein 8    | Ndufs8       | NP_659119    | 24       | 24            | membrane, mitochondrion, respiratory chain                                                   | 4 iron, 4 sulfur cluster binding, electron carrier activity, iron ion binding, iron-sulfur cluster binding, metal ion binding, NADH dehydrogenase (ubiquinone) activity, NADH dehydrogenase activity, oxidoreductase activity, oxidoreductase activity, acting on NADH or NADPH | electron transport chain, oxidation reduction, transport                                                                                  |
| PREDICTED: hypothetical protein                   | LOC100042503 | XP_001478493 | 15       | 24            | not classified                                                                               | not classified                                                                                                                                                                                                                                                                  | not classified                                                                                                                            |
| ribosomal protein L18                             | Rpl18        | NP_033103    | 22       | 23            | cellular_component, cytoplasm, intracellular, ribonucleoprotein complex, ribosome            | molecular_function, structural constituent of ribosome                                                                                                                                                                                                                          | biological_process, translation                                                                                                           |
| S100 calcium binding protein G                    | S100g        | NP_033919    | 9        | 23            | apical plasma membrane, basolateral plasma membrane                                          | calcium ion binding, vitamin D binding                                                                                                                                                                                                                                          | not classified                                                                                                                            |
| cytochrome c oxidase, subunit Vb                  | Cox5b        | NP_034072    | 14       | 23            | membrane, mitochondrial envelope, mitochondrial inner membrane, mitochondrion                | cytochrome-c oxidase activity, metal ion binding, zinc ion binding                                                                                                                                                                                                              | not classified                                                                                                                            |
| WD repeat domain 1                                | Wdr1         | NP_035845    | 66       | 23            | actin cytoskeleton, cytoplasm, cytoskeleton                                                  | actin binding                                                                                                                                                                                                                                                                   | sensory perception of sound                                                                                                               |
| ATPase, H <sup>+</sup> transporting, V1 subunit D | Atp6v1d      | NP_076210    | 28       | 23            | proton-transporting two-sector ATPase complex, catalytic domain                              | ATPase activity, coupled to transmembrane movement of substances, proton-transporting ATPase activity, rotational mechanism                                                                                                                                                     | ATP synthesis coupled proton transport, ion transport, proton transport, transport                                                        |
| RAB14, member RAS oncogene family                 | Rab14        | NP_080973    | 24       | 23            | membrane, plasma membrane                                                                    | GTP binding, nucleotide binding                                                                                                                                                                                                                                                 | protein transport, small GTPase mediated signal transduction, transport                                                                   |
| glutathione S-transferase kappa 1                 | Gstk1        | NP_083831    | 26       | 23            | mitochondrial inner membrane, mitochondrion, outer membrane-bounded periplasmic space        | glutathione peroxidase activity, glutathione transferase activity, protein disulfide oxidoreductase activity, transferase activity                                                                                                                                              | glutathione metabolic process                                                                                                             |
| carboxylesterase 3                                | Ces3         | NP_444430    | 62       | 23            | endoplasmic reticulum                                                                        | carboxylesterase activity, fatty-acyl-ethyl-ester synthase activity, hydrolase activity                                                                                                                                                                                         | acyl-CoA metabolic process, response to toxin                                                                                             |
| aldolase B, fructose-bisphosphate                 | Aldob        | NP_659152    | 40       | 23            | not classified                                                                               | catalytic activity, fructose-bisphosphate aldolase activity, lyase activity                                                                                                                                                                                                     | glycolysis, metabolic process                                                                                                             |
| spectrin beta 2 isoform 1                         | Spnb2        | NP_787030    | 274      | 23            | cortical cytoskeleton, cytoplasm, cytoskeleton, membrane, nucleus, plasma membrane, spectrin | actin binding, calmodulin binding, protein binding, structural constituent of cytoskeleton                                                                                                                                                                                      | actin filament capping, common-partner SMAD protein phosphorylation, SMAD protein nuclear translocation                                   |

| Protein Name                                                | Gene Name | Accession No | Mw (kDa) | Peptide Count | GO Component                                                                                                                                                        | GO Function                                                                                                                                                                                        | GO Process                                                                                                                                                                                                                                                                                                                                                                                                                                                                                                                                                                                                                                                                                                                                                                                                                                                                                      |
|-------------------------------------------------------------|-----------|--------------|----------|---------------|---------------------------------------------------------------------------------------------------------------------------------------------------------------------|----------------------------------------------------------------------------------------------------------------------------------------------------------------------------------------------------|-------------------------------------------------------------------------------------------------------------------------------------------------------------------------------------------------------------------------------------------------------------------------------------------------------------------------------------------------------------------------------------------------------------------------------------------------------------------------------------------------------------------------------------------------------------------------------------------------------------------------------------------------------------------------------------------------------------------------------------------------------------------------------------------------------------------------------------------------------------------------------------------------|
| ATP synthase F0 subunit 8                                   | ATP8      | NP_904332    | 8        | 23            | not classified                                                                                                                                                      | not classified                                                                                                                                                                                     | not classified                                                                                                                                                                                                                                                                                                                                                                                                                                                                                                                                                                                                                                                                                                                                                                                                                                                                                  |
| adaptor-related protein complex 2, beta 1 subunit isoform a | Ap2b1     | NP_001030931 | 106      | 22            | clathrin adaptor complex, coated pit, membrane, membrane coat, plasma membrane                                                                                      | binding, clathrin binding, protein binding, protein transporter activity                                                                                                                           | intracellular protein transport, protein transport, vesicle-mediated transport                                                                                                                                                                                                                                                                                                                                                                                                                                                                                                                                                                                                                                                                                                                                                                                                                  |
| catalase                                                    | Cat       | NP_033934    | 60       | 22            | mitochondrion, peroxisomal membrane, peroxisome                                                                                                                     | aminoacylase activity, catalase activity, heme binding, iron ion binding, metal ion binding, oxidoreductase activity, oxidoreductase activity, acting on peroxide as acceptor, peroxidase activity | aerobic respiration, cholesterol metabolic process, hemoglobin metabolic process, hydrogen peroxide catabolic process, negative regulation of NF-kappaB transcription factor activity, oxidation reduction, positive regulation of cell division, positive regulation of NF-kappaB transcription factor activity, positive regulation of phosphoinositide 3-kinase cascade, response to oxidative stress, triglyceride metabolic process                                                                                                                                                                                                                                                                                                                                                                                                                                                        |
| coatamer protein complex subunit alpha                      | Copa      | NP_034068    | 139      | 22            | COP1 vesicle coat, cytoplasm, cytoplasmic vesicle, extracellular region, extracellular space, Golgi apparatus, membrane, membrane coat, microsome, soluble fraction | hormone activity, protein binding, structural molecule activity                                                                                                                                    | intracellular protein transport, pancreatic juice secretion, protein transport, transport, vesicle-mediated transport                                                                                                                                                                                                                                                                                                                                                                                                                                                                                                                                                                                                                                                                                                                                                                           |
| superoxide dismutase 1, soluble                             | Sod1      | NP_035564    | 16       | 22            | cytoplasm, extracellular space, mitochondrion                                                                                                                       | antioxidant activity, copper ion binding, metal ion binding, oxidoreductase activity, protein binding, superoxide dismutase activity, zinc ion binding                                             | activation of MAPK activity, aging, auditory receptor cell stereocilium organization, cellular iron ion homeostasis, DNA fragmentation involved in apoptosis, double-strand break repair, embryo implantation, glutathione metabolic process, heart contraction, hydrogen peroxide biosynthetic process, locomotory behavior, muscle maintenance, myelin maintenance in the peripheral nervous system, myeloid cell homeostasis, negative regulation of apoptosis, negative regulation of neuron apoptosis, neurofilament cytoskeleton organization, ovarian follicle development, oxidation reduction, regulation of blood pressure, regulation of multicellular organism growth, relaxation of vascular smooth muscle, removal of superoxide radicals, response to axon injury, response to drug, response to ethanol, response to heat, response to hydrogen peroxide, response to oxidative |

| Protein Name                                                                           | Gene Name      | Accession No | Mw (kDa) | Peptide Count | GO Component                                                                                   | GO Function                                                                                                                                                                                                          | GO Process                                                                                                                                                                                                                                                                                                                                                                                                                                                                                                                                                                                                                                                                                                                                                                                                                                                                                                  |
|----------------------------------------------------------------------------------------|----------------|--------------|----------|---------------|------------------------------------------------------------------------------------------------|----------------------------------------------------------------------------------------------------------------------------------------------------------------------------------------------------------------------|-------------------------------------------------------------------------------------------------------------------------------------------------------------------------------------------------------------------------------------------------------------------------------------------------------------------------------------------------------------------------------------------------------------------------------------------------------------------------------------------------------------------------------------------------------------------------------------------------------------------------------------------------------------------------------------------------------------------------------------------------------------------------------------------------------------------------------------------------------------------------------------------------------------|
| acyl-Coenzyme A dehydrogenase, short/branched chain                                    | Acadsb         | NP_080102    | 48       | 22            | mitochondrion                                                                                  | acyl-CoA dehydrogenase activity, electron carrier activity, FAD binding, oxidoreductase activity, oxidoreductase activity, acting on the CH-CH group of donors, short-branched-chain-acyl-CoA dehydrogenase activity | fatty acid metabolic process, lipid metabolic process, metabolic process, oxidation reduction                                                                                                                                                                                                                                                                                                                                                                                                                                                                                                                                                                                                                                                                                                                                                                                                               |
| biphenyl hydrolase-like (serine hydrolase, breast epithelial mucin-associated antigen) | Bphl           | NP_080788    | 33       | 22            | cytoplasm, mitochondrion                                                                       | hydrolase activity                                                                                                                                                                                                   | not classified                                                                                                                                                                                                                                                                                                                                                                                                                                                                                                                                                                                                                                                                                                                                                                                                                                                                                              |
| PREDICTED: hypothetical protein LOC219189                                              | 1300010F03 Rik | XP_920456    | 213      | 22            | extracellular region, mitochondrion                                                            | ATP binding, ATPase activity, nucleoside-triphosphatase activity, nucleotide binding                                                                                                                                 | not classified                                                                                                                                                                                                                                                                                                                                                                                                                                                                                                                                                                                                                                                                                                                                                                                                                                                                                              |
| glutathione peroxidase 1                                                               | Gpx1           | NP_032186    | 22       | 21            | cytoplasm, mitochondrion                                                                       | glutathione peroxidase activity, oxidoreductase activity, peroxidase activity, selenium binding                                                                                                                      | angiogenesis involved in wound healing, apoptosis, blood vessel endothelial cell migration, cell proliferation, endothelial cell development, fat cell differentiation, heart contraction, hydrogen peroxide catabolic process, induction of apoptosis, induction of apoptosis by oxidative stress, interaction with symbiont, lipid metabolic process, myoblast proliferation, myotube differentiation, negative regulation of apoptosis, negative regulation of inflammatory response to antigenic stimulus, oxidation reduction, positive regulation of protein kinase B signaling cascade, protein amino acid oxidation, regulation of neuron apoptosis, response to gamma radiation, response to hydrogen peroxide, response to hydroperoxide, response to oxidative stress, response to reactive oxygen species, response to symbiotic bacterium, response to toxin, response to wounding response to |
| phosphoglycerate kinase 2                                                              | Pgk2           | NP_112467    | 45       | 21            | cytoplasm                                                                                      | ATP binding, kinase activity, nucleotide binding, phosphoglycerate kinase activity, transferase activity                                                                                                             | glycolysis                                                                                                                                                                                                                                                                                                                                                                                                                                                                                                                                                                                                                                                                                                                                                                                                                                                                                                  |
| 3-hydroxybutyrate dehydrogenase, type 1                                                | Bdh1           | NP_780386    | 38       | 21            | mitochondrial inner membrane, mitochondrion                                                    | 3-hydroxybutyrate dehydrogenase activity, binding, catalytic activity, oxidoreductase activity                                                                                                                       | metabolic process, oxidation reduction                                                                                                                                                                                                                                                                                                                                                                                                                                                                                                                                                                                                                                                                                                                                                                                                                                                                      |
| PREDICTED: NADH dehydrogenase (ubiquinone) 1 alpha subcomplex 11 isoform 6             | Ndufa11        | XP_930081    | 15       | 21            | integral to membrane, membrane, mitochondrial inner membrane, mitochondrion, respiratory chain | protein transporter activity                                                                                                                                                                                         | electron transport chain, protein transport, transport                                                                                                                                                                                                                                                                                                                                                                                                                                                                                                                                                                                                                                                                                                                                                                                                                                                      |

| Protein Name                                                                  | Gene Name | Accession No | Mw (kDa) | Peptide Count | GO Component                                                                                                   | GO Function                                                                                                                                                                                                                                                                                                                                                                                                                                                                         | GO Process                                                                                                                                                                                                                                                                                                                                                                                                                              |
|-------------------------------------------------------------------------------|-----------|--------------|----------|---------------|----------------------------------------------------------------------------------------------------------------|-------------------------------------------------------------------------------------------------------------------------------------------------------------------------------------------------------------------------------------------------------------------------------------------------------------------------------------------------------------------------------------------------------------------------------------------------------------------------------------|-----------------------------------------------------------------------------------------------------------------------------------------------------------------------------------------------------------------------------------------------------------------------------------------------------------------------------------------------------------------------------------------------------------------------------------------|
| cofilin 1, non-muscle                                                         | Cfi1      | NP_031713    | 19       | 20            | cortical actin cytoskeleton, cytoplasm, cytoskeleton, cytosol, extracellular region, intracellular, nucleus    | actin binding                                                                                                                                                                                                                                                                                                                                                                                                                                                                       | actin filament organization, cell motion, cell projection organization, cytokinesis, establishment of cell polarity, negative regulation of cell size, neural crest cell migration, neural fold formation, positive regulation of actin filament depolymerization, protein amino acid phosphorylation, response to amino acid stimulus                                                                                                  |
| aldo-keto reductase family 1, member B3 (aldose reductase)                    | Akr1b3    | NP_033788    | 36       | 20            | cytoplasm                                                                                                      | aldehyde reductase activity, oxidoreductase activity                                                                                                                                                                                                                                                                                                                                                                                                                                | oxidation reduction                                                                                                                                                                                                                                                                                                                                                                                                                     |
| cell division cycle 42                                                        | Cdc42     | NP_033991    | 21       | 20            | apical part of cell, cell projection, intracellular, membrane, plasma membrane                                 | GTP binding, GTPase activity, GTP-dependent protein binding, nucleotide binding, protein binding                                                                                                                                                                                                                                                                                                                                                                                    | adherens junction organization, cell division, cell-cell adhesion, cellular protein localization, endosome transport, establishment or maintenance of apical/basal cell polarity, filopodium assembly, neuron fate determination, nuclear migration, nucleus localization, positive regulation of phosphoinositide 3-kinase activity, regulation of mitosis, Rho protein signal transduction, small GTPase mediated signal transduction |
| ribosomal protein L7                                                          | Rpl7      | NP_035421    | 31       | 20            | cytosolic large ribosomal subunit, intracellular, large ribosomal subunit, ribonucleoprotein complex, ribosome | DNA binding, mRNA binding, protein homodimerization activity, RNA binding, structural constituent of ribosome, transcription regulator activity                                                                                                                                                                                                                                                                                                                                     | translation                                                                                                                                                                                                                                                                                                                                                                                                                             |
| ATPase, H <sup>+</sup> /K <sup>+</sup> exchanging, gastric, alpha polypeptide | Atp4a     | NP_061201    | 113      | 20            | integral to membrane, membrane, plasma membrane                                                                | ATP binding, ATPase activity, coupled to transmembrane movement of ions, phosphorylative mechanism, catalytic activity, hydrogen:potassium-exchanging ATPase activity, hydrolase activity, hydrolase activity, acting on acid anhydrides, catalyzing transmembrane movement of substances, magnesium ion binding, metal ion binding, monovalent inorganic cation transmembrane transporter activity, nucleotide binding, potassium ion binding, protein heterodimerization activity | ATP biosynthetic process, ATP hydrolysis coupled proton transport, cation transport, ion transport, metabolic process, monovalent inorganic cation transport, pH reduction, potassium ion transport, proton transport, regulation of proton transport, response to drug, transport                                                                                                                                                      |

| Protein Name                                                                   | Gene Name | Accession No | Mw (kDa) | Peptide Count | GO Component                                                                                       | GO Function                                                                                                                                                                                         | GO Process                                                                                                                |
|--------------------------------------------------------------------------------|-----------|--------------|----------|---------------|----------------------------------------------------------------------------------------------------|-----------------------------------------------------------------------------------------------------------------------------------------------------------------------------------------------------|---------------------------------------------------------------------------------------------------------------------------|
| stomatin-like protein 2                                                        | Stoml2    | NP_075720    | 38       | 20            | cytoplasm, cytoskeleton, membrane, mitochondrial inner membrane, mitochondrion                     | not classified                                                                                                                                                                                      | not classified                                                                                                            |
| ubiquinol-cytochrome c reductase, complex III subunit VII                      | Uqcrc     | NP_079628    | 10       | 20            | membrane, mitochondrial inner membrane, mitochondrion, respiratory chain                           | ubiquinol-cytochrome-c reductase activity                                                                                                                                                           | electron transport chain, transport                                                                                       |
| apolipoprotein O                                                               | ApoO      | NP_080949    | 23       | 20            | integral to membrane, membrane                                                                     | not classified                                                                                                                                                                                      | not classified                                                                                                            |
| NADH dehydrogenase subunit 1                                                   | ND1       | NP_904328    | 36       | 20            | integral to membrane, mitochondrion                                                                | NADH dehydrogenase (ubiquinone) activity, oxidoreductase activity                                                                                                                                   | oxidation reduction                                                                                                       |
| ADP-ribosylation factor 3                                                      | Arf3      | NP_031504    | 21       | 19            | Golgi apparatus, intracellular                                                                     | GTP binding, nucleotide binding                                                                                                                                                                     | protein transport, small GTPase mediated signal transduction, transport, vesicle-mediated transport                       |
| carnitine palmitoyltransferase 2                                               | Cpt2      | NP_034079    | 74       | 19            | membrane, mitochondrial inner membrane, mitochondrion                                              | acyltransferase activity, carnitine O-palmitoyltransferase activity, transferase activity                                                                                                           | fatty acid metabolic process, lipid metabolic process, transport                                                          |
| talin 1                                                                        | Tln1      | NP_035732    | 270      | 19            | cell projection, cytoplasm, cytoskeleton, focal adhesion, membrane, plasma membrane, ruffle        | actin binding, binding, protein binding, structural constituent of cytoskeleton                                                                                                                     | cell-substrate junction assembly, cortical actin cytoskeleton organization, cytoskeletal anchoring at plasma membrane     |
| enolase 2, gamma neuronal                                                      | Eno2      | NP_038537    | 47       | 19            | cytoplasm, intracellular, membrane, perikaryon, phosphopyruvate hydratase complex, plasma membrane | lyase activity, magnesium ion binding, metal ion binding, phosphopyruvate hydratase activity                                                                                                        | glycolysis                                                                                                                |
| tubulin, beta                                                                  | Tubb2b    | NP_076205    | 50       | 19            | microtubule, protein complex                                                                       | GTP binding, GTPase activity, nucleotide binding, structural molecule activity                                                                                                                      | microtubule-based movement, microtubule-based process, protein polymerization                                             |
| dihydropyridine S-succinyltransferase (E2 component of 2-oxoglutarate complex) | Dlst      | NP_084501    | 49       | 19            | mitochondrion, oxoglutarate dehydrogenase complex                                                  | acyltransferase activity, dihydropyridyllysine-residue succinyltransferase activity, lipoic acid binding, transferase activity                                                                      | metabolic process, tricarboxylic acid cycle                                                                               |
| 3-hydroxyisobutyrate dehydrogenase precursor                                   | Hibadh    | NP_663542    | 35       | 19            | mitochondrion                                                                                      | 3-hydroxyisobutyrate dehydrogenase activity, binding, catalytic activity, coenzyme binding, NAD or NADH binding, oxidoreductase activity, phosphogluconate dehydrogenase (decarboxylating) activity | metabolic process, oxidation reduction, pentose-phosphate shunt, valine metabolic process                                 |
| peroxiredoxin 6                                                                | Prdx6     | NP_031479    | 25       | 18            | cytoplasm, cytosol, lysosome                                                                       | antioxidant activity, catalytic activity, hydrolase activity, oxidoreductase activity, peroxidase activity, peroxiredoxin activity                                                                  | bleb formation, cell redox homeostasis, lipid catabolic process, oxidation reduction, response to reactive oxygen species |
| ADP-ribosylation factor 5                                                      | Arf5      | NP_031506    | 21       | 18            | cytoplasm, Golgi apparatus, intracellular, plasma membrane                                         | GTP binding, nucleotide binding                                                                                                                                                                     | protein transport, small GTPase mediated signal transduction, transport, vesicle-mediated transport                       |
| enolase 3, beta muscle                                                         | Eno3      | NP_031959    | 47       | 18            | cytoplasm, phosphopyruvate hydratase complex                                                       | lyase activity, magnesium ion binding, metal ion binding, phosphopyruvate hydratase activity                                                                                                        | glycolysis                                                                                                                |

| Protein Name                                               | Gene Name | Accession No | Mw (kDa) | Peptide Count | GO Component                                                                                                                             | GO Function                                                                                                                                                    | GO Process                                                                                                                                                                                                                                                     |
|------------------------------------------------------------|-----------|--------------|----------|---------------|------------------------------------------------------------------------------------------------------------------------------------------|----------------------------------------------------------------------------------------------------------------------------------------------------------------|----------------------------------------------------------------------------------------------------------------------------------------------------------------------------------------------------------------------------------------------------------------|
| catenin alpha 1                                            | Ctnna1    | NP_033948    | 100      | 18            | actin cytoskeleton, adherens junction, cell junction, cytoplasm, cytoskeleton, lamellipodium, membrane, plasma membrane, zonula adherens | actin filament binding, cadherin binding, protein binding, structural molecule activity                                                                        | apical junction assembly, cell adhesion, establishment or maintenance of cell polarity, negative regulation of apoptosis, negative regulation of neuroblast proliferation, positive regulation of smoothed signaling pathway, regulation of cell proliferation |
| matrin 3                                                   | Matr3     | NP_034901    | 95       | 18            | intracellular, nucleus                                                                                                                   | metal ion binding, nucleic acid binding, nucleotide binding, RNA binding, zinc ion binding                                                                     | not classified                                                                                                                                                                                                                                                 |
| ribosomal protein S18                                      | Rps18     | NP_035426    | 18       | 18            | cytoplasm, intracellular, ribonucleoprotein complex, ribosome                                                                            | RNA binding, rRNA binding, structural constituent of ribosome                                                                                                  | translation                                                                                                                                                                                                                                                    |
| erythrocyte protein band 4.1-like 3                        | Epb4.113  | NP_038841    | 103      | 18            | cytoplasm, cytoskeleton, extrinsic to membrane                                                                                           | actin binding, binding, cytoskeletal protein binding, structural molecule activity                                                                             | cortical actin cytoskeleton organization                                                                                                                                                                                                                       |
| Parkinson disease protein 7                                | Park7     | NP_065594    | 20       | 18            | cytoplasm, mitochondrion, nucleus                                                                                                        | peroxiredoxin activity, RNA binding                                                                                                                            | adult locomotory behavior, cell proliferation, dopamine uptake, hydrogen peroxide metabolic process, membrane depolarization, membrane hyperpolarization, response to hydrogen peroxide, response to stress, synaptic transmission, dopaminergic               |
| vacuolar protein sorting 35                                | Vps35     | NP_075373    | 92       | 18            | cytoplasm, integral to membrane, membrane                                                                                                | not classified                                                                                                                                                 | protein transport, transport, vacuolar protein processing                                                                                                                                                                                                      |
| cytochrome b-5                                             | Cyb5      | NP_080073    | 15       | 18            | endoplasmic reticulum, integral to membrane, membrane, microsome, mitochondrion                                                          | heme binding, iron ion binding, metal ion binding, stearyl-CoA 9-desaturase activity                                                                           | electron transport chain, fatty acid metabolic process, transport                                                                                                                                                                                              |
| NADH dehydrogenase (ubiquinone) 1 alpha subcomplex, 5      | Ndufa5    | NP_080890    | 13       | 18            | membrane, mitochondrial inner membrane, mitochondrion, respiratory chain                                                                 | oxidoreductase activity, acting on NADH or NADPH                                                                                                               | electron transport chain, respiratory electron transport chain, transport                                                                                                                                                                                      |
| FXVD domain-containing ion transport regulator 2 isoform b | Fxyd2     | NP_439888    | 7        | 18            | integral to membrane, membrane                                                                                                           | ion channel activity, potassium ion binding, sodium ion binding                                                                                                | ion transport, potassium ion transport, sodium ion transport, transport                                                                                                                                                                                        |
| isocitrate dehydrogenase 3, beta subunit                   | Idh3b     | NP_570954    | 42       | 18            | mitochondrion                                                                                                                            | oxidoreductase activity                                                                                                                                        | oxidation reduction                                                                                                                                                                                                                                            |
| ladinin                                                    | Lad1      | NP_598425    | 59       | 18            | basement membrane, extracellular region, proteinaceous extracellular matrix                                                              | not classified                                                                                                                                                 | not classified                                                                                                                                                                                                                                                 |
| MOCO sulphurase C-terminal domain containing 2             | Mosc2     | NP_598445    | 38       | 18            | membrane, mitochondrial inner membrane, mitochondrial outer membrane, mitochondrion                                                      | catalytic activity, molybdenum ion binding, oxidoreductase activity, pyridoxal phosphate binding                                                               | oxidation reduction                                                                                                                                                                                                                                            |
| very-long-chain acyl-CoA dehydrogenase VLCAD homolog       | Acad9     | NP_766266    | 69       | 18            | mitochondrion                                                                                                                            | acyl-CoA dehydrogenase activity, electron carrier activity, FAD binding, oxidoreductase activity, oxidoreductase activity, acting on the CH-CH group of donors | metabolic process, oxidation reduction                                                                                                                                                                                                                         |



| Protein Name                                      | Gene Name      | Accession No | Mw (kDa) | Peptide Count | GO Component                                                                                                      | GO Function                                                                                                                                                                                                                                                                      | GO Process                                                                                                                                    |
|---------------------------------------------------|----------------|--------------|----------|---------------|-------------------------------------------------------------------------------------------------------------------|----------------------------------------------------------------------------------------------------------------------------------------------------------------------------------------------------------------------------------------------------------------------------------|-----------------------------------------------------------------------------------------------------------------------------------------------|
| malic enzyme 3, NADP(+)-dependent, mitochondrial  | Me3            | NP_852072    | 67       | 18            | mitochondrion                                                                                                     | binding, catalytic activity, malate dehydrogenase (oxaloacetate-decarboxylating) (NADP+) activity, malic enzyme activity, metal ion binding, NAD or NADH binding, oxidoreductase activity, oxidoreductase activity, acting on the CH-OH group of donors, NAD or NADP as acceptor | malate metabolic process, metabolic process, oxidation reduction                                                                              |
| cytochrome b                                      | CYTB           | NP_904340    | 43       | 18            | integral to membrane, membrane, membrane fraction, mitochondrial inner membrane, mitochondrion, respiratory chain | electron carrier activity, iron ion binding, metal ion binding, oxidoreductase activity                                                                                                                                                                                          | electron transport chain, oxidation reduction, respiratory electron transport chain, transport                                                |
| keratin 76                                        | Krt76          | NP_001028349 | 63       | 17            | intermediate filament, keratin filament                                                                           | structural molecule activity                                                                                                                                                                                                                                                     | not classified                                                                                                                                |
| glutathione S-transferase, mu 2                   | Gstm2          | NP_032209    | 26       | 17            | cytoplasm                                                                                                         | glutathione transferase activity, protein binding, transferase activity                                                                                                                                                                                                          | metabolic process                                                                                                                             |
| Wiskott-Aldrich syndrome homolog                  | Was            | NP_033541    | 54       | 17            | cytoplasm, cytoskeleton, vesicle membrane                                                                         | identical protein binding, protein binding                                                                                                                                                                                                                                       | actin filament polymerization, actin filament-based movement, actin polymerization or depolymerization, endosome transport, T cell activation |
| nucleolin                                         | Ncl            | NP_035010    | 77       | 17            | nucleolus, nucleoplasm, nucleus, ribonucleoprotein complex                                                        | DNA binding, nucleic acid binding, nucleotide binding, protein binding, RNA binding                                                                                                                                                                                              | not classified                                                                                                                                |
| pendrin                                           | Slc26a4        | NP_035997    | 86       | 17            | apical plasma membrane, integral to membrane, membrane                                                            | anion transmembrane transporter activity, chloride ion binding, secondary active sulfate transmembrane transporter activity, transporter activity                                                                                                                                | organ morphogenesis, regulation of pH, regulation of protein localization, sulfate transport, transport                                       |
| ribosomal protein S9-like                         | Rps9           | NP_084043    | 23       | 17            | intracellular, ribonucleoprotein complex, ribosome, small ribosomal subunit                                       | RNA binding, rRNA binding, structural constituent of ribosome                                                                                                                                                                                                                    | translation                                                                                                                                   |
| RAS-related protein-1a                            | Rap1a          | NP_663516    | 21       | 17            | guanyl-nucleotide exchange factor complex, intracellular, membrane, plasma membrane                               | GTP binding, GTPase activity, nucleotide binding, protein binding, Ras GTPase binding                                                                                                                                                                                            | small GTPase mediated signal transduction                                                                                                     |
| RAB35, member RAS oncogene family                 | Rab35          | NP_937806    | 23       | 17            | membrane, plasma membrane                                                                                         | GTP binding, nucleotide binding                                                                                                                                                                                                                                                  | protein transport, small GTPase mediated signal transduction, transport                                                                       |
| PREDICTED: similar to mKIAA0829 protein isoform 4 | Cand1          | XP_909201    | 159      | 17            | nucleus                                                                                                           | binding                                                                                                                                                                                                                                                                          | modification-dependent protein catabolic process, regulation of transcription, transcription                                                  |
| hypothetical protein LOC237880                    | 1700071K01 Rik | NP_001028937 | 29       | 16            | not classified                                                                                                    | not classified                                                                                                                                                                                                                                                                   | not classified                                                                                                                                |
| basigin isoform 2                                 | Bsg            | NP_001070652 | 30       | 16            | integral to membrane, membrane, plasma membrane                                                                   | mannose binding, sugar binding                                                                                                                                                                                                                                                   | not classified                                                                                                                                |
| talin 2                                           | Tln2           | NP_001074711 | 272      | 16            | cell junction, cytoplasm, cytoskeleton, focal adhesion, membrane, plasma membrane, ruffle, synapse                | actin binding, binding, protein binding, structural constituent of cytoskeleton                                                                                                                                                                                                  | cytoskeletal anchoring at plasma membrane                                                                                                     |
| glioblastoma amplified                            | Gbas           | NP_032121    | 33       | 16            | mitochondrion                                                                                                     | molecular_function                                                                                                                                                                                                                                                               | biological_process                                                                                                                            |
| prohibitin                                        | Phb            | NP_032857    | 30       | 16            | membrane, mitochondrial inner membrane, mitochondrion                                                             | not classified                                                                                                                                                                                                                                                                   | DNA replication                                                                                                                               |

| Protein Name                                                                                | Gene Name | Accession No | Mw (kDa) | Peptide Count | GO Component                                                                                | GO Function                                                                                                                                             | GO Process                                                                                                                                             |
|---------------------------------------------------------------------------------------------|-----------|--------------|----------|---------------|---------------------------------------------------------------------------------------------|---------------------------------------------------------------------------------------------------------------------------------------------------------|--------------------------------------------------------------------------------------------------------------------------------------------------------|
| tyrosine 3-monooxygenase/tryptophan 5-monooxygenase activation protein, epsilon polypeptide | Ywhae     | NP_033562    | 29       | 16            | cytoplasm, mitochondrion                                                                    | monooxygenase activity, protein binding, protein domain specific binding                                                                                | cerebral cortex development, hippocampus development, negative regulation of protein amino acid dephosphorylation, neuron migration, protein targeting |
| kallikrein 1                                                                                | Klk1      | NP_034769    | 29       | 16            | not classified                                                                              | hydrolase activity, peptidase activity, serine-type endopeptidase activity, serine-type peptidase activity                                              | proteolysis                                                                                                                                            |
| t-complex protein 10b                                                                       | Tcp10b    | NP_035683    | 49       | 16            | not classified                                                                              | not classified                                                                                                                                          | not classified                                                                                                                                         |
| tyrosine 3-monooxygenase/tryptophan 5-monooxygenase activation protein, theta polypeptide   | Ywhaq     | NP_035869    | 28       | 16            | cellular_component, cytoplasm                                                               | monooxygenase activity, protein domain specific binding                                                                                                 | protein targeting, signal transduction, small GTPase mediated signal transduction                                                                      |
| RAB10, member RAS oncogene family                                                           | Rab10     | NP_057885    | 23       | 16            | Golgi apparatus, membrane, plasma membrane                                                  | GTP binding, nucleotide binding, protein binding                                                                                                        | intracellular protein transport, protein transport, small GTPase mediated signal transduction, transport                                               |
| progesterone receptor membrane component                                                    | Pgrmc1    | NP_058063    | 22       | 16            | endoplasmic reticulum, integral to membrane, membrane, microsome                            | heme binding, lipid binding, receptor activity, steroid binding                                                                                         | not classified                                                                                                                                         |
| hypoxia up-regulated 1                                                                      | Hyou1     | NP_067370    | 111      | 16            | endoplasmic reticulum                                                                       | ATP binding, nucleotide binding                                                                                                                         | response to stress                                                                                                                                     |
| LIM domain and actin binding 1 isoform b                                                    | Lima1     | NP_075550    | 66       | 16            | actin cytoskeleton, cytoplasm, cytoskeleton                                                 | actin binding, metal ion binding, molecular_function, zinc ion binding                                                                                  | biological_process                                                                                                                                     |
| tetratricopeptide repeat domain 11                                                          | Fis1      | NP_079838    | 17       | 16            | integral to membrane, membrane, mitochondrial outer membrane, mitochondrion, peroxisome     | binding                                                                                                                                                 | apoptosis                                                                                                                                              |
| fumarylacetoacetate hydrolase domain containing 2A                                          | Fahd2a    | NP_083905    | 35       | 16            | not classified                                                                              | calcium ion binding, catalytic activity, hydrolase activity, magnesium ion binding, metal ion binding                                                   | metabolic process                                                                                                                                      |
| coatomer protein complex, subunit beta 1                                                    | Copb1     | NP_203534    | 107      | 16            | COPI vesicle coat, cytoplasm, cytoplasmic vesicle, Golgi apparatus, membrane, membrane coat | binding, structural molecule activity                                                                                                                   | intracellular protein transport, protein transport, transport, vesicle-mediated transport                                                              |
| nodal modulator 1                                                                           | Nomo1     | NP_694697    | 133      | 16            | not classified                                                                              | not classified                                                                                                                                          | not classified                                                                                                                                         |
| isoleucine-tRNA synthetase 2, mitochondrial                                                 | Iars2     | NP_941055    | 113      | 16            | cytoplasm, mitochondrion                                                                    | aminoacyl-tRNA ligase activity, ATP binding, catalytic activity, isoleucine-tRNA ligase activity, ligase activity, nucleotide binding, zinc ion binding | isoleucyl-tRNA aminoacylation, translation, tRNA aminoacylation for protein translation                                                                |
| plasma membrane calcium ATPase 4                                                            | Atp2b4    | NP_998781    | 133      | 16            | integral to membrane, integral to plasma membrane, membrane                                 | ATP binding, hydrolase activity, nucleotide binding                                                                                                     | calcium ion transport, ion transport, transport                                                                                                        |
| PREDICTED: hypothetical protein                                                             | EG621837  | XP_001473932 | 9        | 16            | not classified                                                                              | not classified                                                                                                                                          | not classified                                                                                                                                         |
| hepatocellular carcinoma-associated antigen 112                                             | Tmem176a  | NP_001091741 | 27       | 15            | integral to membrane, membrane                                                              | not classified                                                                                                                                          | not classified                                                                                                                                         |
| myoferlin                                                                                   | Fer13     | NP_001093104 | 233      | 15            | cytoplasmic vesicle, integral to membrane, membrane, nucleus, plasma membrane               | protein binding                                                                                                                                         | cellular response to heat                                                                                                                              |
| calmodulin 1                                                                                | Calm1     | NP_033920    | 17       | 15            | not classified                                                                              | calcium ion binding                                                                                                                                     | cell cycle, positive regulation of DNA binding                                                                                                         |
| ornithine aminotransferase                                                                  | Oat       | NP_058674    | 48       | 15            | mitochondrion                                                                               | catalytic activity, ornithine oxo-acid transaminase activity, pyridoxal phosphate binding, transaminase activity, transferase activity                  | not classified                                                                                                                                         |

| Protein Name                                                           | Gene Name      | Accession No | Mw (kDa) | Peptide Count | GO Component                                                                                                          | GO Function                                                                                                                                                               | GO Process                                                                                             |
|------------------------------------------------------------------------|----------------|--------------|----------|---------------|-----------------------------------------------------------------------------------------------------------------------|---------------------------------------------------------------------------------------------------------------------------------------------------------------------------|--------------------------------------------------------------------------------------------------------|
| myosin, heavy polypeptide 14                                           | Myh14          | NP_082297    | 228      | 15            | axon, cytoplasm, growth cone, myosin complex, stress fiber                                                            | actin binding, actin filament binding, actin-dependent ATPase activity, ATP binding, calmodulin binding, microfilament motor activity, motor activity, nucleotide binding | actin filament-based movement, regulation of cell shape                                                |
| NADH-ubiquinone oxidoreductase flavoprotein 3 isoform 1                | 1500032D16 Rik | NP_084363    | 50       | 15            | membrane, mitochondrial inner membrane, mitochondrion, respiratory chain                                              | molecular_function                                                                                                                                                        | electron transport chain, transport                                                                    |
| glycine-N-acyltransferase                                              | Glyat          | NP_666047    | 34       | 15            | mitochondrion                                                                                                         | acyltransferase activity, glycine N-acyltransferase activity, transferase activity                                                                                        | not classified                                                                                         |
| AAA-ATPase TOB3                                                        | Atad3a         | NP_849534    | 67       | 15            | mitochondrial inner membrane, mitochondrion                                                                           | ATP binding, nucleoside-triphosphatase activity, nucleotide binding                                                                                                       | not classified                                                                                         |
| reticulon 3 isoform 1                                                  | Rtn3           | NP_001003934 | 104      | 14            | endoplasmic reticulum, Golgi apparatus, integral to membrane, membrane                                                | molecular_function, protein binding                                                                                                                                       | apoptosis, transport, vesicle-mediated transport                                                       |
| N-myc downstream regulated gene 1                                      | Ndrg1          | NP_032707    | 43       | 14            | not classified                                                                                                        | not classified                                                                                                                                                            | not classified                                                                                         |
| protein kinase C and casein kinase substrate in neurons 2              | Pacsin2        | NP_035992    | 56       | 14            | cytoplasm, cytoplasmic vesicle, cytosol, trans-Golgi network                                                          | cytoskeletal protein binding, kinase activity, protein binding                                                                                                            | endocytosis, negative regulation of endocytosis, signal transduction                                   |
| glutathione S-transferase, pi 1                                        | Gstp1          | NP_038569    | 24       | 14            | not classified                                                                                                        | glutathione transferase activity, transferase activity                                                                                                                    | glutathione metabolic process, metabolic process                                                       |
| 2,4-dienoyl CoA reductase 1, mitochondrial                             | Decr1          | NP_080448    | 36       | 14            | mitochondrion                                                                                                         | 2,4-dienoyl-CoA reductase (NADPH) activity, binding, catalytic activity, oxidoreductase activity                                                                          | metabolic process, oxidation reduction                                                                 |
| glutathione S-transferase, mu 4                                        | Gstm4          | NP_081040    | 26       | 14            | cytosol                                                                                                               | glutathione transferase activity, transferase activity                                                                                                                    | nitrobenzene metabolic process, xenobiotic catabolic process                                           |
| NADH dehydrogenase (ubiquinone) 1, alpha/beta subcomplex, 1            | Ndubf1         | NP_082453    | 17       | 14            | mitochondrion, respiratory chain                                                                                      | acyl carrier activity, cofactor binding, phosphopantetheine binding                                                                                                       | electron transport chain, fatty acid biosynthetic process, lipid biosynthetic process, transport       |
| CDGSH iron sulfur domain 1                                             | Cisd1          | NP_598768    | 12       | 14            | integral to membrane, intracellular membrane-bounded organelle, membrane, mitochondrial outer membrane, mitochondrion | 2 iron, 2 sulfur cluster binding, iron ion binding, iron-sulfur cluster binding, metal ion binding                                                                        | regulation of cellular respiration                                                                     |
| PREDICTED: similar to heterogeneous nuclear ribonucleoprotein U-like 2 | LOC100046594   | XP_001477737 | 85       | 14            | nucleus                                                                                                               | nucleic acid binding, protein binding                                                                                                                                     | not classified                                                                                         |
| complement component 1, q subcomponent binding protein                 | C1qbp          | NP_031599    | 31       | 13            | mitochondrial matrix, mitochondrion                                                                                   | protein binding                                                                                                                                                           | not classified                                                                                         |
| cytochrome c oxidase, subunit VI a, polypeptide 1                      | Cox6a1         | NP_031774    | 12       | 13            | membrane, mitochondrial inner membrane, mitochondrial respiratory chain complex IV, mitochondrion                     | cytochrome-c oxidase activity                                                                                                                                             | not classified                                                                                         |
| guanosine diphosphate (GDP) dissociation inhibitor 2                   | Gdi2           | NP_032138    | 51       | 13            | cytoplasm, Golgi apparatus, membrane                                                                                  | GTPase activator activity, Rab GDP-dissociation inhibitor activity, Rab GTPase activator activity                                                                         | protein transport, regulation of GTPase activity, small GTPase mediated signal transduction            |
| kinesin family member 5B                                               | Kif5b          | NP_032474    | 110      | 13            | ciliary rootlet, cytoplasm, cytoskeleton, kinesin complex, membrane-bounded organelle, microtubule, neuron projection | ATP binding, microtubule motor activity, motor activity, nucleotide binding, protein binding                                                                              | cytoplasm organization, microtubule-based movement, microtubule-based process, mitochondrial transport |

| Protein Name                                         | Gene Name | Accession No | Mw (kDa) | Peptide Count | GO Component                                                                                           | GO Function                                                                                                                                                                                                                                     | GO Process                                                                                                                                                                                                            |
|------------------------------------------------------|-----------|--------------|----------|---------------|--------------------------------------------------------------------------------------------------------|-------------------------------------------------------------------------------------------------------------------------------------------------------------------------------------------------------------------------------------------------|-----------------------------------------------------------------------------------------------------------------------------------------------------------------------------------------------------------------------|
| tumor-associated calcium signal transducer 1         | Tacstd1   | NP_032558    | 35       | 13            | apical plasma membrane, basolateral plasma membrane, integral to membrane, membrane                    | not classified                                                                                                                                                                                                                                  | not classified                                                                                                                                                                                                        |
| H2A histone family, member Y                         | H2afy     | NP_036145    | 40       | 13            | Barr body, centrosome, chromosome, condensed chromosome, nucleosome, nucleus                           | chromatin binding, DNA binding                                                                                                                                                                                                                  | chromatin modification, dosage compensation, nucleosome assembly                                                                                                                                                      |
| malonyl-CoA decarboxylase                            | Mlycd     | NP_064350    | 55       | 13            | cytoplasm, mitochondrion, peroxisome                                                                   | carboxy-lyase activity, lyase activity, malonyl-CoA decarboxylase activity                                                                                                                                                                      | fatty acid biosynthetic process, lipid biosynthetic process                                                                                                                                                           |
| ARP3 actin-related protein 3 homolog                 | Actr3     | NP_076224    | 47       | 13            | cell projection, cytoplasm, cytoskeleton, lamellipodium                                                | actin binding, ATP binding, nucleotide binding, protein binding                                                                                                                                                                                 | regulation of actin filament polymerization                                                                                                                                                                           |
| leucine aminopeptidase 3                             | Lap3      | NP_077754    | 56       | 13            | cytoplasm, intracellular, mitochondrion                                                                | aminopeptidase activity, hydrolase activity, magnesium ion binding, manganese ion binding, metal ion binding, metalloexopeptidase activity, peptidase activity, zinc ion binding                                                                | protein metabolic process, proteolysis                                                                                                                                                                                |
| SERPINE1 mRNA binding protein 1                      | Serbp1    | NP_080090    | 45       | 13            | cytoplasm, nucleus                                                                                     | RNA binding                                                                                                                                                                                                                                     | not classified                                                                                                                                                                                                        |
| SA hypertension-associated homolog                   | Acsm3     | NP_997606    | 66       | 13            | mitochondrial matrix, mitochondrion                                                                    | ATP binding, butyrate-CoA ligase activity, catalytic activity, fatty-acid ligase activity, ligase activity, magnesium ion binding, metal ion binding, nucleotide binding                                                                        | fatty acid biosynthetic process, fatty acid metabolic process, lipid metabolic process, metabolic process                                                                                                             |
| PREDICTED: hypothetical protein                      | LOC674419 | XP_982574    | 30       | 13            | not classified                                                                                         | not classified                                                                                                                                                                                                                                  | not classified                                                                                                                                                                                                        |
| early endosome antigen 1                             | Eea1      | NP_001001932 | 161      | 12            | cytoplasm, early endosome, endosome, intracellular, membrane, serine-pyruvate aminotransferase complex | metal ion binding, zinc ion binding                                                                                                                                                                                                             | not classified                                                                                                                                                                                                        |
| heterogeneous nuclear ribonucleoprotein A1 isoform b | Hnmpa1    | NP_001034218 | 39       | 12            | cytoplasm, nucleus, ribonucleoprotein complex, spliceosomal complex                                    | nucleic acid binding, nucleotide binding, RNA binding                                                                                                                                                                                           | alternative nuclear mRNA splicing, via spliceosome, mRNA processing, mRNA transport, RNA splicing, transport                                                                                                          |
| adducin 1 (alpha) isoform 3                          | Add1      | NP_001095914 | 73       | 12            | cytoplasm, cytoskeleton, membrane, plasma membrane                                                     | actin binding, calmodulin binding, metal ion binding, structural molecule activity                                                                                                                                                              | cell morphogenesis, cell volume homeostasis, erythrocyte differentiation, hemoglobin metabolic process, homeostasis of number of cells within a tissue, in utero embryonic development, multicellular organism growth |
| isocitrate dehydrogenase 1 (NADP+), soluble          | Idh1      | NP_001104790 | 47       | 12            | cytoplasm, cytosol                                                                                     | isocitrate dehydrogenase (NADP+) activity, magnesium ion binding, manganese ion binding, metal ion binding, NAD or NADH binding, oxidoreductase activity, oxidoreductase activity, acting on the CH-OH group of donors, NAD or NADP as acceptor | glutathione metabolic process, glyoxylate cycle, isocitrate metabolic process, oxidation reduction, response to oxidative stress, tricarboxylic acid cycle                                                            |

| Protein Name                                          | Gene Name | Accession No | Mw (kDa) | Peptide Count | GO Component                                                                                                                                                                                                                                                                                     | GO Function                                                                                                                                                                       | GO Process                                                                                                                                                                                                                                                                                                                                                                                                                                                                                                                                                                                                                                                                                                                                                                                                                                                   |
|-------------------------------------------------------|-----------|--------------|----------|---------------|--------------------------------------------------------------------------------------------------------------------------------------------------------------------------------------------------------------------------------------------------------------------------------------------------|-----------------------------------------------------------------------------------------------------------------------------------------------------------------------------------|--------------------------------------------------------------------------------------------------------------------------------------------------------------------------------------------------------------------------------------------------------------------------------------------------------------------------------------------------------------------------------------------------------------------------------------------------------------------------------------------------------------------------------------------------------------------------------------------------------------------------------------------------------------------------------------------------------------------------------------------------------------------------------------------------------------------------------------------------------------|
| adaptor protein complex AP-1, beta 1 subunit          | Ap1b1     | NP_031480    | 104      | 12            | clathrin adaptor complex, cytoplasmic vesicle, Golgi apparatus, membrane, membrane coat, trans-Golgi network                                                                                                                                                                                     | binding, protein binding, protein transporter activity                                                                                                                            | endocytosis, intracellular protein transport, protein transport, transport, vesicle-mediated transport                                                                                                                                                                                                                                                                                                                                                                                                                                                                                                                                                                                                                                                                                                                                                       |
| acidic ribosomal phosphoprotein P0                    | Rplp0     | NP_031501    | 34       | 12            | intracellular, ribonucleoprotein complex, ribosome                                                                                                                                                                                                                                               | structural constituent of ribosome                                                                                                                                                | ribosome biogenesis, translational elongation                                                                                                                                                                                                                                                                                                                                                                                                                                                                                                                                                                                                                                                                                                                                                                                                                |
| cytochrome P450, family 4, subfamily b, polypeptide 1 | Cyp4b1    | NP_031849    | 59       | 12            | endoplasmic reticulum, membrane, microsomes                                                                                                                                                                                                                                                      | aromatase activity, electron carrier activity, heme binding, iron ion binding, metal ion binding, monooxygenase activity, oxidoreductase activity                                 | oxidation reduction                                                                                                                                                                                                                                                                                                                                                                                                                                                                                                                                                                                                                                                                                                                                                                                                                                          |
| discs large homolog 1                                 | Dlg1      | NP_031888    | 103      | 12            | basolateral plasma membrane, cell junction, cell projection membrane, cell-cell adherens junction, endoplasmic reticulum, immunological synapse, lateral plasma membrane, membrane, membrane raft, neuromuscular junction, plasma membrane, postsynaptic density, postsynaptic membrane, synapse | protein binding, protein complex scaffold                                                                                                                                         | activation of protein kinase activity, amyloid precursor protein metabolic process, branching involved in ureteric bud morphogenesis, embryonic skeletal system morphogenesis, formation of immunological synapse, hard palate development, lens development in camera-type eye, membrane raft organization, negative regulation of epithelial cell proliferation, negative regulation of T cell proliferation, peristalsis, positive regulation of actin filament polymerization, positive regulation of cell proliferation, positive regulation of developmental growth, positive regulation of multicellular organism growth, protein localization, regulation of membrane potential, reproductive structure development, smooth muscle tissue development, T cell activation, T cell cytokine production, tissue morphogenesis, ureteric bud development |
| acyl-CoA synthetase long-chain family member 1        | Acs1      | NP_032007    | 78       | 12            | endoplasmic reticulum, integral to membrane, membrane, microsomes, mitochondrial outer membrane, mitochondrion, peroxisome                                                                                                                                                                       | acetate-CoA ligase (ADP-forming) activity, ATP binding, catalytic activity, ligase activity, long-chain-fatty-acid-CoA ligase activity, magnesium ion binding, nucleotide binding | fatty acid metabolic process, lipid metabolic process, metabolic process                                                                                                                                                                                                                                                                                                                                                                                                                                                                                                                                                                                                                                                                                                                                                                                     |
| leukotriene A4 hydrolase                              | Lta4h     | NP_032543    | 69       | 12            | cytoplasm                                                                                                                                                                                                                                                                                        | catalytic activity, hydrolase activity, leukotriene-A4 hydrolase activity, metal ion binding, metalloproteinase activity, peptidase activity, zinc ion binding                    | leukotriene biosynthetic process, proteolysis                                                                                                                                                                                                                                                                                                                                                                                                                                                                                                                                                                                                                                                                                                                                                                                                                |

| Protein Name                                             | Gene Name | Accession No | Mw (kDa) | Peptide Count | GO Component                                                                                                                                                               | GO Function                                                                                                                                             | GO Process                                                                                                                                                                                                                                                                                                                                                                                                                                                                                                                          |
|----------------------------------------------------------|-----------|--------------|----------|---------------|----------------------------------------------------------------------------------------------------------------------------------------------------------------------------|---------------------------------------------------------------------------------------------------------------------------------------------------------|-------------------------------------------------------------------------------------------------------------------------------------------------------------------------------------------------------------------------------------------------------------------------------------------------------------------------------------------------------------------------------------------------------------------------------------------------------------------------------------------------------------------------------------|
| RAS-related C3 botulinum substrate 1                     | Rac1      | NP_033033    | 21       | 12            | cell projection, cytoplasm, cytoplasmic membrane-bounded vesicle, extrinsic to plasma membrane, intracellular, lamellipodium, membrane, membrane fraction, plasma membrane | GTP binding, GTPase activity, nucleotide binding, protein binding                                                                                       | axon guidance, cell adhesion, cell migration, cerebral cortex radially oriented cell migration, cytoskeleton organization, dendrite development, embryonic olfactory bulb interneuron precursor migration, endocytosis, hyperosmotic response, lamellipodium assembly, positive regulation of actin filament polymerization, positive regulation of lamellipodium assembly, positive regulation of phosphoinositide 3-kinase activity, regulation of cell migration, ruffle organization, small GTPase mediated signal transduction |
| SAR1a gene homolog                                       | Sar1a     | NP_033146    | 22       | 12            | endoplasmic reticulum, Golgi apparatus, intracellular, sarcoplasmic reticulum                                                                                              | GTP binding, nucleotide binding                                                                                                                         | intracellular protein transport, protein transport, transport, vesicle-mediated transport                                                                                                                                                                                                                                                                                                                                                                                                                                           |
| AHNAK nucleoprotein isoform 1                            | Ahnak     | NP_033773    | 604      | 12            | cell-cell junction                                                                                                                                                         | not classified                                                                                                                                          | not classified                                                                                                                                                                                                                                                                                                                                                                                                                                                                                                                      |
| chaperonin containing Tcp1, subunit 3 (gamma)            | Cct3      | NP_033966    | 61       | 12            | chaperonin-containing T-complex, cytoplasm                                                                                                                                 | ATP binding, nucleotide binding, protein binding, unfolded protein binding                                                                              | cellular protein metabolic process, protein folding                                                                                                                                                                                                                                                                                                                                                                                                                                                                                 |
| DEAD/H (Asp-Glu-Ala-Asp/His) box polypeptide 3, X-linked | Ddx3x     | NP_034158    | 73       | 12            | cytoplasm, nucleus                                                                                                                                                         | ATP binding, ATP-dependent helicase activity, DNA binding, helicase activity, hydrolase activity, nucleic acid binding, nucleotide binding, RNA binding | not classified                                                                                                                                                                                                                                                                                                                                                                                                                                                                                                                      |
| profilin 1                                               | Pfn1      | NP_035202    | 15       | 12            | actin cytoskeleton, cytoplasm, cytoskeleton, cytosol, extracellular region, nucleus                                                                                        | actin binding, protein binding, Rho GTPase binding                                                                                                      | actin cytoskeleton organization, cytoskeleton organization, neural tube closure, regulation of actin polymerization or depolymerization, regulation of transcription from RNA polymerase II promoter, sequestering of actin monomers                                                                                                                                                                                                                                                                                                |
| ubiquitin specific protease 5 (isopeptidase T)           | Usp5      | NP_038728    | 96       | 12            | not classified                                                                                                                                                             | cysteine-type peptidase activity, hydrolase activity, metal ion binding, peptidase activity, ubiquitin thioesterase activity, zinc ion binding          | modification-dependent protein catabolic process, ubiquitin-dependent protein catabolic process                                                                                                                                                                                                                                                                                                                                                                                                                                     |
| aquaporin 3                                              | Aqp3      | NP_057898    | 32       | 12            | basolateral plasma membrane, integral to membrane, integral to plasma membrane, membrane, pore complex                                                                     | transporter activity, water channel activity                                                                                                            | transport, water transport                                                                                                                                                                                                                                                                                                                                                                                                                                                                                                          |

| Protein Name                                                | Gene Name         | Accession No | Mw (kDa) | Peptide Count | GO Component                                                                                                  | GO Function                                                                                                                                                                    | GO Process                                                                                                                                                                                                                                  |
|-------------------------------------------------------------|-------------------|--------------|----------|---------------|---------------------------------------------------------------------------------------------------------------|--------------------------------------------------------------------------------------------------------------------------------------------------------------------------------|---------------------------------------------------------------------------------------------------------------------------------------------------------------------------------------------------------------------------------------------|
| stratifin                                                   | Sfn               | NP_061224    | 28       | 12            | cytoplasm, extracellular region, nucleus                                                                      | protein domain specific binding                                                                                                                                                | keratinocyte differentiation, keratinocyte proliferation, negative regulation of cell proliferation, positive regulation of cell growth, regulation of cell cycle, regulation of cyclin-dependent protein kinase activity, skin development |
| hydroxysteroid dehydrogenase like 2                         | Hsd12             | NP_077217    | 54       | 12            | mitochondrion                                                                                                 | binding, catalytic activity, oxidoreductase activity, sterol carrier activity                                                                                                  | metabolic process, oxidation reduction                                                                                                                                                                                                      |
| ribosome binding protein 1 isoform a                        | Rrbp1             | NP_077243    | 158      | 12            | endoplasmic reticulum, integral to endoplasmic reticulum membrane, integral to membrane, membrane             | not classified                                                                                                                                                                 | protein transport, transmembrane transport, transport                                                                                                                                                                                       |
| GrpE-like 1, mitochondrial                                  | Grpel1            | NP_077798    | 24       | 12            | mitochondrion                                                                                                 | adenyl-nucleotide exchange factor activity, chaperone binding, protein binding, protein homodimerization activity                                                              | protein folding, protein import into mitochondrial matrix                                                                                                                                                                                   |
| coiled-coil-helix-coiled-coil-helix domain containing 3     | Chchd3            | NP_079612    | 26       | 12            | mitochondrial inner membrane, mitochondrion                                                                   | not classified                                                                                                                                                                 | not classified                                                                                                                                                                                                                              |
| sorcin isoform 2                                            | Sri               | NP_079894    | 20       | 12            | cytoplasm, intracellular, plasma membrane, vesicle, Z disc                                                    | calcium ion binding, protein binding                                                                                                                                           | calcium ion transport                                                                                                                                                                                                                       |
| NADH dehydrogenase (ubiquinone) 1 alpha subcomplex, 6 (B14) | Ndufa6            | NP_080263    | 15       | 12            | membrane, mitochondrial inner membrane, mitochondrion, respiratory chain                                      | not classified                                                                                                                                                                 | electron transport chain, transport                                                                                                                                                                                                         |
| glyoxalase domain containing 4                              | Glod4             | NP_080305    | 33       | 12            | mitochondrion                                                                                                 | not classified                                                                                                                                                                 | not classified                                                                                                                                                                                                                              |
| vacuolar H+ ATPase C2                                       | Atp6v1c2          | NP_598460    | 48       | 12            | proton-transporting V-type ATPase, V1 domain                                                                  | hydrogen-exporting ATPase activity, phosphorylative mechanism, hydrolase activity, acting on acid anhydrides, catalyzing transmembrane movement of substances, protein binding | ATP synthesis coupled proton transport, ion transport, proton transport, transport                                                                                                                                                          |
| sarcosine dehydrogenase                                     | Sardh             | NP_619606    | 102      | 12            | cytoplasm, mitochondrion                                                                                      | aminomethyltransferase activity, oxidoreductase activity, sarcosine dehydrogenase activity                                                                                     | glycine catabolic process, oxidation reduction                                                                                                                                                                                              |
| cytochrome c oxidase subunit III                            | COX3              | NP_904334    | 30       | 12            | integral to membrane, membrane, mitochondrion, proton-transporting ATP synthase complex, coupling factor F(o) | hydrolase activity, oxidoreductase activity                                                                                                                                    | ATP biosynthetic process, ion transport, oxidation reduction, proton transport, transport                                                                                                                                                   |
| PREDICTED: proline-rich polypeptide 6 isoform 4             | Prr6              | XP_921840    | 28       | 12            | nucleus, spindle midzone                                                                                      | carbon-sulfur lyase activity                                                                                                                                                   | cell cycle, cell division, centromeric heterochromatin formation, metabolic process, mitosis, positive regulation of cytokinesis, regulation of chromosome organization                                                                     |
| aldo-keto reductase family 1, member C19                    | Akr1c19           | NP_001013807 | 37       | 11            | cellular_component                                                                                            | molecular_function                                                                                                                                                             | biological_process                                                                                                                                                                                                                          |
| predicted gene, OTTMUSG00000002778                          | OTTMUSG0000002778 | NP_001104805 | 12       | 11            | not classified                                                                                                | not classified                                                                                                                                                                 | not classified                                                                                                                                                                                                                              |
| cysteine and glycine-rich protein 2                         | Csrp2             | NP_031818    | 21       | 11            | nucleus                                                                                                       | metal ion binding, molecular_function, zinc ion binding                                                                                                                        | cell differentiation, multicellular organismal development                                                                                                                                                                                  |

| Protein Name                                          | Gene Name | Accession No | Mw (kDa) | Peptide Count | GO Component                                                                                                        | GO Function                                                                                                                                                                                                                 | GO Process                                                                                                                                            |
|-------------------------------------------------------|-----------|--------------|----------|---------------|---------------------------------------------------------------------------------------------------------------------|-----------------------------------------------------------------------------------------------------------------------------------------------------------------------------------------------------------------------------|-------------------------------------------------------------------------------------------------------------------------------------------------------|
| ATP-binding cassette, sub-family D, member 3          | Abcd3     | NP_033017    | 75       | 11            | integral to membrane, membrane, mitochondrial inner membrane, mitochondrion, peroxisomal membrane, peroxisome       | ATP binding, ATPase activity, nucleoside-triphosphatase activity, nucleotide binding, protein binding                                                                                                                       | transport                                                                                                                                             |
| golgi apparatus protein 1                             | Glg1      | NP_033175    | 134      | 11            | Golgi apparatus, Golgi membrane, integral to membrane, membrane, plasma membrane                                    | sugar binding                                                                                                                                                                                                               | not classified                                                                                                                                        |
| NADH dehydrogenase (ubiquinone) 1 alpha subcomplex, 2 | Ndufa2    | NP_035015    | 11       | 11            | membrane, mitochondrial inner membrane, mitochondrial respiratory chain complex I, mitochondrion, respiratory chain | NADH dehydrogenase (ubiquinone) activity                                                                                                                                                                                    | electron transport chain, transport                                                                                                                   |
| ribosomal protein L6                                  | Rpl6      | NP_035420    | 34       | 11            | cytoplasm, intracellular, nucleolus, nucleus, ribonucleoprotein complex, ribosome                                   | molecular_function, structural constituent of ribosome                                                                                                                                                                      | biological_process, translation                                                                                                                       |
| nuclease sensitive element binding protein 1          | Ybx1      | NP_035862    | 36       | 11            | cytoplasm, nucleus                                                                                                  | DNA binding, nucleic acid binding, protein binding, RNA binding, single-stranded DNA binding                                                                                                                                | in utero embryonic development, mRNA processing, regulation of transcription, regulation of transcription, DNA-dependent, RNA splicing, transcription |
| annexin A11                                           | Anxa11    | NP_038497    | 54       | 11            | nucleus                                                                                                             | calcium ion binding, calcium-dependent phospholipid binding, phosphatidylethanolamine binding                                                                                                                               | not classified                                                                                                                                        |
| metaxin 1                                             | Mtx1      | NP_038632    | 36       | 11            | integral to membrane, membrane, mitochondrial inner membrane, mitochondrial outer membrane, mitochondrion           | not classified                                                                                                                                                                                                              | protein targeting to mitochondrion, protein transport, transport                                                                                      |
| esterase D/formylglutathione hydrolase                | Esd       | NP_058599    | 31       | 11            | cytoplasm, cytoplasmic membrane-bounded vesicle, cytoplasmic vesicle                                                | carboxylesterase activity, hydrolase activity, hydrolase activity, acting on ester bonds, S-formylglutathione hydrolase activity                                                                                            | not classified                                                                                                                                        |
| aldehyde dehydrogenase 9, subfamily A1                | Aldh9a1   | NP_064377    | 56       | 11            | cytoplasm, cytosol                                                                                                  | 4-trimethylammoniumbutyraldehyde dehydrogenase activity, aldehyde dehydrogenase (NAD) activity, oxidoreductase activity, oxidoreductase activity, acting on the aldehyde or oxo group of donors, NAD or NADP as acceptor    | carnitine metabolic process, metabolic process, oxidation reduction                                                                                   |
| L-specific multifunctional beta-oxidation protein     | Ehhadh    | NP_076226    | 78       | 11            | mitochondrion, peroxisome                                                                                           | 3-hydroxyacyl-CoA dehydrogenase activity, binding, catalytic activity, coenzyme binding, dodecenoyl-CoA delta-isomerase activity, enoyl-CoA hydratase activity, isomerase activity, lyase activity, oxidoreductase activity | acyl-CoA metabolic process, fatty acid beta-oxidation, fatty acid metabolic process, lipid metabolic process, metabolic process, oxidation reduction  |
| ribosomal protein L4                                  | Rpl4      | NP_077174    | 47       | 11            | intracellular, ribonucleoprotein complex, ribosome                                                                  | protein binding, structural constituent of ribosome                                                                                                                                                                         | biological_process, translation                                                                                                                       |



| Protein Name                                     | Gene Name | Accession No | Mw (kDa) | Peptide Count | GO Component                                                                                               | GO Function                                                                                                                                                                                                     | GO Process                                                                                                         |
|--------------------------------------------------|-----------|--------------|----------|---------------|------------------------------------------------------------------------------------------------------------|-----------------------------------------------------------------------------------------------------------------------------------------------------------------------------------------------------------------|--------------------------------------------------------------------------------------------------------------------|
| glyoxalase 1                                     | Glo1      | NP_079650    | 21       | 11            | not classified                                                                                             | lactoylglutathione lyase activity, lyase activity, metal ion binding, zinc ion binding                                                                                                                          | not classified                                                                                                     |
| L-arginine:glycine amidinotransferase            | Gatm      | NP_080237    | 48       | 11            | cytoplasm, membrane, mitochondrial inner membrane, mitochondrial intermembrane space, mitochondrion        | glycine amidinotransferase activity, hydrolase activity, acting on carbon-nitrogen (but not peptide) bonds, in linear amidines, transferase activity                                                            | creatine biosynthetic process                                                                                      |
| apolipoprotein O-like                            | Apool     | NP_080841    | 29       | 11            | extracellular region, mitochondrial inner membrane, mitochondrion                                          | not classified                                                                                                                                                                                                  | not classified                                                                                                     |
| phosphoglucomutase 2                             | Pgm2      | NP_082408    | 62       | 11            | not classified                                                                                             | magnesium ion binding, metal ion binding, phosphoglucomutase activity                                                                                                                                           | glucose metabolic process                                                                                          |
| hypothetical protein LOC64697                    | Keg1      | NP_083826    | 34       | 11            | microtubule, mitochondrion                                                                                 | acyltransferase activity, glycine N-acyltransferase activity, transferase activity                                                                                                                              | not classified                                                                                                     |
| glutamyl-prolyl-tRNA synthetase                  | Eprs      | NP_084011    | 170      | 11            | cytoplasm                                                                                                  | aminoacyl-tRNA ligase activity, ATP binding, catalytic activity, glutamate-tRNA ligase activity, ligase activity, nucleotide binding, proline-tRNA ligase activity, RNA binding                                 | glutamyl-tRNA aminoacylation, prolyl-tRNA aminoacylation, translation, tRNA aminoacylation for protein translation |
| acyl-CoA synthetase medium-chain family member 1 | Acsm1     | NP_473435    | 65       | 11            | mitochondrial matrix, mitochondrion                                                                        | acyl-CoA ligase activity, ATP binding, butyrate-CoA ligase activity, catalytic activity, fatty-acid ligase activity, GTP binding, ligase activity, magnesium ion binding, metal ion binding, nucleotide binding | fatty acid biosynthetic process, fatty acid metabolic process, lipid metabolic process, metabolic process          |
| Rho GDP dissociation inhibitor (GDI) alpha       | Arhgdia   | NP_598557    | 23       | 11            | cytoplasm, immunological synapse                                                                           | GTPase activator activity, protein binding, Rho GDP dissociation inhibitor activity                                                                                                                             | regulation of protein localization, Rho protein signal transduction                                                |
| high density lipoprotein binding protein         | Hdlbp     | NP_598569    | 142      | 11            | cytoplasm, high-density lipoprotein particle, nucleus                                                      | RNA binding                                                                                                                                                                                                     | cholesterol metabolic process, lipid metabolic process, lipid transport, steroid metabolic process, transport      |
| transmembrane protein 109                        | Tmem109   | NP_598903    | 26       | 11            | cellular_component, endoplasmic reticulum, integral to membrane, membrane, nucleus, sarcoplasmic reticulum | molecular_function                                                                                                                                                                                              | biological_process                                                                                                 |
| eukaryotic translation initiation factor 4B      | Eif4b     | NP_663600    | 41       | 11            | not classified                                                                                             | nucleic acid binding, nucleotide binding, RNA binding, translation initiation factor activity                                                                                                                   | translation                                                                                                        |

| Protein Name                                                                               | Gene Name    | Accession No | Mw (kDa) | Peptide Count | GO Component                                                                                      | GO Function                                                                                                                                                             | GO Process                                                                                                                                                                                                                                                                                                                                                                                                                                                                                                                                                                |
|--------------------------------------------------------------------------------------------|--------------|--------------|----------|---------------|---------------------------------------------------------------------------------------------------|-------------------------------------------------------------------------------------------------------------------------------------------------------------------------|---------------------------------------------------------------------------------------------------------------------------------------------------------------------------------------------------------------------------------------------------------------------------------------------------------------------------------------------------------------------------------------------------------------------------------------------------------------------------------------------------------------------------------------------------------------------------|
| aldehyde dehydrogenase family 5, subfamily A1                                              | Aldh5a1      | NP_766120    | 56       | 11            | mitochondrion                                                                                     | oxidoreductase activity, oxidoreductase activity, acting on the aldehyde or oxo group of donors, NAD or NADP as acceptor, succinate-semialdehyde dehydrogenase activity | acetate metabolic process, galactosylceramide metabolic process, gamma-aminobutyric acid catabolic process, gamma-aminobutyric acid metabolic process, glucose metabolic process, glucosylceramide metabolic process, glutamate metabolic process, glutamine metabolic process, glutathione metabolic process, glycerophospholipid metabolic process, metabolic process, neurotransmitter catabolic process, oxidation reduction, post-embryonic development, respiratory electron transport chain, short-chain fatty acid metabolic process, succinate metabolic process |
| DnaJ (Hsp40) homolog, subfamily C, member 11                                               | Dnajc11      | NP_766292    | 63       | 11            | mitochondrial inner membrane                                                                      | heat shock protein binding, molecular_function                                                                                                                          | biological_process                                                                                                                                                                                                                                                                                                                                                                                                                                                                                                                                                        |
| peptidase M20 domain containing 1                                                          | Pm20d1       | NP_835180    | 56       | 11            | extracellular region                                                                              | hydrolase activity, metal ion binding, metallopeptidase activity, peptidase activity, protein dimerization activity, zinc ion binding                                   | proteolysis                                                                                                                                                                                                                                                                                                                                                                                                                                                                                                                                                               |
| glycyl-tRNA synthetase                                                                     | Gars         | NP_851009    | 82       | 11            | cytoplasm, secretory granule                                                                      | aminoacyl-tRNA ligase activity, ATP binding, glycine-tRNA ligase activity, ligase activity, nucleotide binding, protein binding                                         | glycyl-tRNA aminoacylation, regulated secretory pathway, translation, tRNA aminoacylation for protein translation                                                                                                                                                                                                                                                                                                                                                                                                                                                         |
| PREDICTED: similar to aldehyde reductase                                                   | LOC100044692 | XP_001472913 | 33       | 11            | not classified                                                                                    | not classified                                                                                                                                                          | not classified                                                                                                                                                                                                                                                                                                                                                                                                                                                                                                                                                            |
| PREDICTED: similar to nuclear pore complex-associated intranuclear coiled-coil protein TPR | LOC100043998 | XP_001474187 | 149      | 11            | not classified                                                                                    | not classified                                                                                                                                                          | not classified                                                                                                                                                                                                                                                                                                                                                                                                                                                                                                                                                            |
| PREDICTED: similar to NADH dehydrogenase (ubiquinone) 1, subcomplex unknown, 2             | LOC675851    | XP_990709    | 14       | 11            | not classified                                                                                    | not classified                                                                                                                                                          | not classified                                                                                                                                                                                                                                                                                                                                                                                                                                                                                                                                                            |
| tubulin, alpha-like 3                                                                      | Tuba13       | NP_001029051 | 50       | 10            | microtubule, protein complex                                                                      | GTP binding, GTPase activity, nucleotide binding, structural molecule activity                                                                                          | microtubule-based movement, microtubule-based process, protein polymerization                                                                                                                                                                                                                                                                                                                                                                                                                                                                                             |
| glutaminase isoform 1                                                                      | Gls          | NP_001074550 | 74       | 10            | not classified                                                                                    | glutaminase activity                                                                                                                                                    | behavior, glutamine catabolic process, regulation of respiratory gaseous exchange by neurological system process, synaptic transmission                                                                                                                                                                                                                                                                                                                                                                                                                                   |
| adaptor protein complex AP-2, alpha 2 subunit                                              | Ap2a2        | NP_031485    | 104      | 10            | clathrin adaptor complex, coated pit, membrane, membrane coat, plasma membrane, secretory granule | binding, lipid binding, protein binding, protein transporter activity                                                                                                   | endocytosis, intracellular protein transport, protein transport, transport, vesicle-mediated transport                                                                                                                                                                                                                                                                                                                                                                                                                                                                    |
| CAP, adenylate cyclase-associated protein 1                                                | Cap1         | NP_031624    | 52       | 10            | cortical actin cytoskeleton, cytoplasm, membrane, plasma membrane                                 | actin binding, binding                                                                                                                                                  | actin cytoskeleton organization, amoeboid cell migration, cell morphogenesis, cytoskeleton organization, receptor-mediated endocytosis                                                                                                                                                                                                                                                                                                                                                                                                                                    |

| Protein Name                                          | Gene Name | Accession No | Mw (kDa) | Peptide Count | GO Component                                                                                | GO Function                                                                                                                                          | GO Process                                                                                                                                                                                                                                                                                                                                                              |
|-------------------------------------------------------|-----------|--------------|----------|---------------|---------------------------------------------------------------------------------------------|------------------------------------------------------------------------------------------------------------------------------------------------------|-------------------------------------------------------------------------------------------------------------------------------------------------------------------------------------------------------------------------------------------------------------------------------------------------------------------------------------------------------------------------|
| heat-responsive protein 12                            | Hrsp12    | NP_032313    | 14       | 10            | not classified                                                                              | endonuclease activity, hydrolase activity, nuclease activity                                                                                         | not classified                                                                                                                                                                                                                                                                                                                                                          |
| heat shock protein 1 (chaperonin 10)                  | Hspe1     | NP_032329    | 11       | 10            | cytoplasm, mitochondrion                                                                    | ATP binding                                                                                                                                          | protein folding, response to stress                                                                                                                                                                                                                                                                                                                                     |
| methylmalonyl-Coenzyme A mutase                       | Mut       | NP_032676    | 83       | 10            | mitochondrion                                                                               | cobalamin binding, cobalt ion binding, intramolecular transferase activity, isomerase activity, metal ion binding, methylmalonyl-CoA mutase activity | metabolic process, post-embryonic development                                                                                                                                                                                                                                                                                                                           |
| RAB7, member RAS oncogene family                      | Rab7      | NP_033031    | 23       | 10            | cytoplasmic vesicle, endosome, Golgi apparatus, late endosome, lysosome                     | GTP binding, nucleotide binding                                                                                                                      | intracellular protein transport, protein transport, small GTPase mediated signal transduction, transport                                                                                                                                                                                                                                                                |
| ribosomal protein L26                                 | Rpl26     | NP_033106    | 17       | 10            | cellular_component, ribosome                                                                | molecular_function                                                                                                                                   | biological_process                                                                                                                                                                                                                                                                                                                                                      |
| ataxin 2                                              | Atxn2     | NP_033151    | 136      | 10            | cytoplasm, perinuclear region of cytoplasm                                                  | DBD domain binding                                                                                                                                   | negative regulation of multicellular organism growth                                                                                                                                                                                                                                                                                                                    |
| cathepsin D                                           | Ctsd      | NP_034113    | 45       | 10            | lysosome, mitochondrion                                                                     | aspartic-type endopeptidase activity, hydrolase activity, peptidase activity                                                                         | autophagic vacuole formation, proteolysis                                                                                                                                                                                                                                                                                                                               |
| glutamate-cysteine ligase, catalytic subunit          | Gclc      | NP_034425    | 73       | 10            | cytosol, glutamate-cysteine ligase complex                                                  | ATP binding, glutamate-cysteine ligase activity, ligase activity, nucleotide binding, protein heterodimerization activity                            | glutathione biosynthetic process, glutathione metabolic process, L-ascorbic acid metabolic process, negative regulation of apoptosis, negative regulation of protein ubiquitination, positive regulation of proteasomal ubiquitin-dependent protein catabolic process, regulation of mitochondrial depolarization, response to arsenic, response to xenobiotic stimulus |
| glutathione S-transferase, mu 1                       | Gstm1     | NP_034488    | 26       | 10            | cytoplasm                                                                                   | glutathione transferase activity, transferase activity                                                                                               | metabolic process                                                                                                                                                                                                                                                                                                                                                       |
| prosaposin                                            | Psap      | NP_035309    | 61       | 10            | extracellular region, lysosome, mitochondrion                                               | not classified                                                                                                                                       | developmental growth, epithelial cell differentiation involved in prostate gland development, lipid metabolic process, prostate gland growth, regulation of MAPKKK cascade, sphingolipid metabolic process                                                                                                                                                              |
| coatamer protein complex, subunit beta 2 (beta prime) | Copb2     | NP_056642    | 102      | 10            | COPI vesicle coat, cytoplasm, cytoplasmic vesicle, Golgi apparatus, membrane, membrane coat | protein binding, structural molecule activity                                                                                                        | intracellular protein transport, protein transport, transport, vesicle-mediated transport                                                                                                                                                                                                                                                                               |
| N-acylsphingosine amidohydrolase 1                    | Asah1     | NP_062708    | 45       | 10            | lysosome                                                                                    | ceramidase activity, hydrolase activity                                                                                                              | lipid metabolic process                                                                                                                                                                                                                                                                                                                                                 |
| mitochondrial carrier homolog 2                       | Mtch2     | NP_062732    | 33       | 10            | integral to membrane, membrane, mitochondrial inner membrane, mitochondrion                 | not classified                                                                                                                                       | transport                                                                                                                                                                                                                                                                                                                                                               |
| RAB2A, member RAS oncogene family                     | Rab2a     | NP_067493    | 24       | 10            | endoplasmic reticulum, Golgi apparatus, membrane                                            | GTP binding, nucleotide binding                                                                                                                      | intracellular protein transport, protein transport, small GTPase mediated signal transduction, transport, vesicle-mediated transport                                                                                                                                                                                                                                    |

| Protein Name                                                                             | Gene Name      | Accession No | Mw (kDa) | Peptide Count | GO Component                                                                                                                                | GO Function                                                                                                                                                                                                                                        | GO Process                                                                                                                                                                                                                                                                                                                        |
|------------------------------------------------------------------------------------------|----------------|--------------|----------|---------------|---------------------------------------------------------------------------------------------------------------------------------------------|----------------------------------------------------------------------------------------------------------------------------------------------------------------------------------------------------------------------------------------------------|-----------------------------------------------------------------------------------------------------------------------------------------------------------------------------------------------------------------------------------------------------------------------------------------------------------------------------------|
| tropomyosin 3, gamma                                                                     | Tpm3           | NP_071709    | 33       | 10            | cleavage furrow, cortical cytoskeleton, cytoplasm, cytoskeleton, filamentous actin, growth cone, neuron projection, podosome                | actin binding                                                                                                                                                                                                                                      | not classified                                                                                                                                                                                                                                                                                                                    |
| splicing factor proline/glutamine rich (polypyrimidine tract binding protein associated) | Sfpq           | NP_076092    | 75       | 10            | cellular_component, nucleus                                                                                                                 | DNA binding, nucleic acid binding, nucleotide binding, RNA binding                                                                                                                                                                                 | biological_process, DNA repair, mRNA processing, regulation of transcription, response to DNA damage stimulus, RNA splicing, transcription                                                                                                                                                                                        |
| coenzyme Q9 homolog                                                                      | Coq9           | NP_080728    | 35       | 10            | mitochondrion                                                                                                                               | not classified                                                                                                                                                                                                                                     | ubiquinone biosynthetic process                                                                                                                                                                                                                                                                                                   |
| histidine triad nucleotide binding protein 2                                             | Hint2          | NP_081147    | 17       | 10            | extracellular region, mitochondrion                                                                                                         | catalytic activity, hydrolase activity                                                                                                                                                                                                             | not classified                                                                                                                                                                                                                                                                                                                    |
| NADH dehydrogenase (ubiquinone) flavoprotein 2                                           | Ndufv2         | NP_082664    | 27       | 10            | membrane, mitochondrial inner membrane, mitochondrion, respiratory chain                                                                    | 2 iron, 2 sulfur cluster binding, electron carrier activity, iron ion binding, iron-sulfur cluster binding, metal ion binding, NAD or NADH binding, NADH dehydrogenase (ubiquinone) activity, NADH dehydrogenase activity, oxidoreductase activity | electron transport chain, oxidation reduction, transport                                                                                                                                                                                                                                                                          |
| ATP-binding cassette, sub-family B (MDR/TAP), member 8                                   | Abcb8          | NP_083296    | 78       | 10            | integral to membrane, membrane, mitochondrial inner membrane, mitochondrion                                                                 | ATP binding, ATPase activity, ATPase activity, coupled to transmembrane movement of substances, nucleoside-triphosphatase activity, nucleotide binding                                                                                             | transport                                                                                                                                                                                                                                                                                                                         |
| splicing factor 3b, subunit 1                                                            | Sf3b1          | NP_112456    | 146      | 10            | nucleus, spliceosomal complex                                                                                                               | binding, chromatin binding, protein binding, RNA splicing factor activity, transesterification mechanism                                                                                                                                           | anterior/posterior pattern formation, mRNA processing, nuclear mRNA splicing, via spliceosome, RNA splicing                                                                                                                                                                                                                       |
| ubiquitin-conjugating enzyme E2N                                                         | Ube2n          | NP_542127    | 17       | 10            | nucleus                                                                                                                                     | ATP binding, ligase activity, nucleotide binding, protein binding, small conjugating protein ligase activity, ubiquitin-protein ligase activity                                                                                                    | DNA repair, modification-dependent protein catabolic process, positive regulation of NF-kappaB transcription factor activity, post-translational protein modification, regulation of protein metabolic process, response to DNA damage stimulus, T cell receptor signaling pathway, ubiquitin-dependent protein catabolic process |
| eukaryotic translation initiation factor 3, subunit H                                    | Eif3h          | NP_542366    | 40       | 10            | cytoplasm, eukaryotic translation initiation factor 3 complex                                                                               | translation initiation factor activity                                                                                                                                                                                                             | translation, translational initiation                                                                                                                                                                                                                                                                                             |
| huntingtin interacting protein 1 related                                                 | Hip1r          | NP_659507    | 119      | 10            | coated pit, cytoplasm, cytoplasmic vesicle, cytoskeleton, membrane                                                                          | actin binding, phospholipid binding                                                                                                                                                                                                                | endocytosis, receptor-mediated endocytosis                                                                                                                                                                                                                                                                                        |
| hypothetical protein LOC217830                                                           | 9030617003 Rik | NP_663423    | 66       | 10            | mitochondrion                                                                                                                               | not classified                                                                                                                                                                                                                                     | not classified                                                                                                                                                                                                                                                                                                                    |
| Cobl-like 1 isoform 1                                                                    | Cobl1          | NP_795999    | 133      | 10            | cellular_component                                                                                                                          | molecular_function                                                                                                                                                                                                                                 | biological_process                                                                                                                                                                                                                                                                                                                |
| ATP synthase F0 subunit 6                                                                | ATP6           | NP_904333    | 25       | 10            | integral to membrane, membrane, mitochondrial inner membrane, mitochondrion, proton-transporting ATP synthase complex, coupling factor F(o) | hydrogen ion transmembrane transporter activity, hydrolase activity                                                                                                                                                                                | ATP biosynthetic process, ATP synthesis coupled proton transport, ion transport, proton transport, transport                                                                                                                                                                                                                      |

| Protein Name                                                              | Gene Name | Accession No | Mw (kDa) | Peptide Count | GO Component                                                                                                                                                       | GO Function                                                                                                                                                                                                                                                                                                       | GO Process                                                                                    |
|---------------------------------------------------------------------------|-----------|--------------|----------|---------------|--------------------------------------------------------------------------------------------------------------------------------------------------------------------|-------------------------------------------------------------------------------------------------------------------------------------------------------------------------------------------------------------------------------------------------------------------------------------------------------------------|-----------------------------------------------------------------------------------------------|
| PREDICTED: similar to Eukaryotic translation elongation factor 2          | LOC433776 | XP_001475612 | 46       | 10            | not classified                                                                                                                                                     | not classified                                                                                                                                                                                                                                                                                                    | not classified                                                                                |
| acyl-Coenzyme A dehydrogenase, short chain                                | Acads     | NP_031409    | 45       | 9             | mitochondrion                                                                                                                                                      | acyl-CoA dehydrogenase activity, butyryl-CoA dehydrogenase activity, electron carrier activity, FAD binding, oxidoreductase activity, oxidoreductase activity, acting on the CH-CH group of donors                                                                                                                | fatty acid metabolic process, lipid metabolic process, metabolic process, oxidation reduction |
| branched chain ketoacid dehydrogenase E1, alpha polypeptide               | Bckdha    | NP_031559    | 50       | 9             | mitochondrion                                                                                                                                                      | 3-methyl-2-oxobutanoate dehydrogenase (2-methylpropanoyl-transferring) activity, cyclin-dependent protein kinase 5 activator regulator activity, metal ion binding, oxidoreductase activity, oxidoreductase activity, acting on the aldehyde or oxo group of donors, disulfide as acceptor, potassium ion binding | metabolic process, oxidation reduction, positive regulation of transcription, DNA-dependent   |
| annexin A2                                                                | Anxa2     | NP_031611    | 39       | 9             | basement membrane, cell junction, cytoplasm, early endosome, extracellular region, membrane fraction, proteinaceous extracellular matrix, sarcolemma, stress fiber | calcium ion binding, calcium-dependent phospholipid binding, cytoskeletal protein binding, phospholipase inhibitor activity, protein binding                                                                                                                                                                      | angiogenesis, collagen fibril organization, fibrinolysis                                      |
| guanine nucleotide binding protein (G protein), beta polypeptide 2 like 1 | Gnb2l1    | NP_032169    | 35       | 9             | cell soma, cytoplasm, membrane, plasma membrane                                                                                                                    | protein kinase C binding, receptor activity                                                                                                                                                                                                                                                                       | intracellular signaling cascade, protein localization                                         |
| glutathione S-transferase, theta 1                                        | Gstt1     | NP_032211    | 27       | 9             | cytoplasm, nucleus                                                                                                                                                 | glutathione transferase activity, transferase activity                                                                                                                                                                                                                                                            | glutathione metabolic process                                                                 |
| ribosomal protein S2                                                      | Rps2      | NP_032529    | 31       | 9             | intracellular, ribonucleoprotein complex, ribosome, small ribosomal subunit                                                                                        | RNA binding, structural constituent of ribosome                                                                                                                                                                                                                                                                   | translation                                                                                   |
| lymphocyte cytosolic protein 1                                            | Lcp1      | NP_032905    | 70       | 9             | actin filament, cytoplasm, phagocytic cup, ruffle                                                                                                                  | actin binding, actin filament binding, calcium ion binding, identical protein binding, protein binding                                                                                                                                                                                                            | actin filament bundle formation, response to wounding                                         |
| protease (prosome, macropain) 26S subunit, ATPase 5                       | Psmc5     | NP_032976    | 46       | 9             | cytoplasm, holo TFIIF complex, nucleus, proteasome complex                                                                                                         | ATP binding, hydrolase activity, nucleoside-triphosphatase activity, nucleotide binding, peptidase activity, protein binding, transcription factor binding                                                                                                                                                        | negative regulation of transcription, protein catabolic process                               |
| ribosomal protein L29                                                     | Rpl29     | NP_033108    | 18       | 9             | cytosolic ribosome, intracellular, peripheral to membrane of membrane fraction, polysomal ribosome, ribonucleoprotein complex, ribosome                            | heparin binding, structural constituent of ribosome                                                                                                                                                                                                                                                               | cell proliferation, cell-substrate adhesion, multicellular organism growth, translation       |

| Protein Name                                                                             | Gene Name | Accession No | Mw (kDa) | Peptide Count | GO Component                                                                                                       | GO Function                                                                                                                                         | GO Process                                                                                                                                                                                                                                                                                                                                                                   |
|------------------------------------------------------------------------------------------|-----------|--------------|----------|---------------|--------------------------------------------------------------------------------------------------------------------|-----------------------------------------------------------------------------------------------------------------------------------------------------|------------------------------------------------------------------------------------------------------------------------------------------------------------------------------------------------------------------------------------------------------------------------------------------------------------------------------------------------------------------------------|
| RAN, member RAS oncogene family                                                          | Ran       | NP_033417    | 24       | 9             | cytoplasm, nucleus                                                                                                 | GTP binding, GTPase activity, nucleotide binding, protein binding                                                                                   | cell cycle, cell division, intracellular protein transport, mitosis, nucleocytoplasmic transport, protein import into nucleus, protein transport, signal transduction, transport                                                                                                                                                                                             |
| cytochrome c oxidase, subunit VIIa 2                                                     | Cox7a2    | NP_034075    | 9        | 9             | membrane, mitochondrial inner membrane, mitochondrial respiratory chain, mitochondrion                             | cytochrome-c oxidase activity, electron carrier activity                                                                                            | not classified                                                                                                                                                                                                                                                                                                                                                               |
| crystallin, zeta                                                                         | Cryz      | NP_034098    | 35       | 9             | cytoplasm                                                                                                          | NADP or NADPH binding, NADPH:quinone reductase activity, oxidoreductase activity, zinc ion binding                                                  | oxidation reduction                                                                                                                                                                                                                                                                                                                                                          |
| integrin beta 1 (fibronectin receptor beta)                                              | Itgb1     | NP_034708    | 88       | 9             | integral to membrane, integrin complex, membrane, neuromuscular junction, plasma membrane, sarcolemma, synaptosome | binding, integrin binding, protein binding, receptor activity                                                                                       | cardiac muscle cell differentiation, cell adhesion, cell fate specification, cell-matrix adhesion, G1/S transition of mitotic cell cycle, germ cell migration, in utero embryonic development, integrin-mediated signaling pathway, negative regulation of cell differentiation, positive regulation of cell proliferation, regulation of cell cycle, sarcomere organization |
| chapsyn-110                                                                              | Dlg2      | NP_035937    | 95       | 9             | cell junction, membrane, plasma membrane, postsynaptic membrane, synapse                                           | protein binding                                                                                                                                     | sensory perception of pain, synaptic transmission                                                                                                                                                                                                                                                                                                                            |
| tubulointerstitial nephritis antigen                                                     | Tinag     | NP_036163    | 54       | 9             | not classified                                                                                                     | not classified                                                                                                                                      | not classified                                                                                                                                                                                                                                                                                                                                                               |
| hexokinase 2                                                                             | Hk2       | NP_038848    | 103      | 9             | not classified                                                                                                     | ATP binding, hexokinase activity, kinase activity, nucleotide binding, phosphotransferase activity, alcohol group as acceptor, transferase activity | carbohydrate metabolic process, carbohydrate phosphorylation, glucose metabolic process, glycolysis                                                                                                                                                                                                                                                                          |
| stress-induced phosphoprotein 1                                                          | Stip1     | NP_058017    | 63       | 9             | cytoplasm, nucleus                                                                                                 | binding                                                                                                                                             | not classified                                                                                                                                                                                                                                                                                                                                                               |
| tyrosine 3-monooxygenase/tryptophan 5-monooxygenase activation protein, beta polypeptide | Ywhab     | NP_061223    | 28       | 9             | cellular_component, cytoplasm                                                                                      | monooxygenase activity, protein binding, protein domain specific binding                                                                            | protein targeting                                                                                                                                                                                                                                                                                                                                                            |
| phosphatidylethanolamine binding protein 1                                               | Pebp1     | NP_061346    | 21       | 9             | cell surface, cytoplasm                                                                                            | ATP binding, lipid binding, nucleotide binding, peptidase inhibitor activity, serine-type endopeptidase inhibitor activity                          | sperm capacitation                                                                                                                                                                                                                                                                                                                                                           |
| neuronal protein 15.6                                                                    | Ndufb11   | NP_062308    | 17       | 9             | integral to membrane, membrane, mitochondrial inner membrane, mitochondrion, respiratory chain                     | not classified                                                                                                                                      | electron transport chain, transport                                                                                                                                                                                                                                                                                                                                          |
| cardiotrophin-like cytokine factor 1                                                     | Clcf1     | NP_064336    | 25       | 9             | extracellular region, extracellular space                                                                          | cytokine activity                                                                                                                                   | B cell differentiation, cell surface receptor linked signal transduction, JAK-STAT cascade                                                                                                                                                                                                                                                                                   |
| ribosomal protein S14                                                                    | Rps14     | NP_065625    | 16       | 9             | intracellular, ribonucleoprotein complex, ribosome                                                                 | structural constituent of ribosome                                                                                                                  | translation                                                                                                                                                                                                                                                                                                                                                                  |

| Protein Name                                                           | Gene Name      | Accession No | Mw (kDa) | Peptide Count | GO Component                                                                                                                              | GO Function                                                                                                                                                                                            | GO Process                                                                                                                                |
|------------------------------------------------------------------------|----------------|--------------|----------|---------------|-------------------------------------------------------------------------------------------------------------------------------------------|--------------------------------------------------------------------------------------------------------------------------------------------------------------------------------------------------------|-------------------------------------------------------------------------------------------------------------------------------------------|
| cell cycle exit and neuronal differentiation 1                         | Cend1          | NP_067291    | 15       | 9             | integral to membrane, membrane                                                                                                            | molecular_function                                                                                                                                                                                     | biological_process                                                                                                                        |
| non-POU-domain-containing, octamer binding protein                     | Nono           | NP_075633    | 55       | 9             | nucleus, paraspeckles                                                                                                                     | DNA binding, nucleic acid binding, nucleotide binding, protein binding, RNA binding                                                                                                                    | DNA recombination, DNA repair, mRNA processing, regulation of transcription, response to DNA damage stimulus, RNA splicing, transcription |
| small glutamine-rich tetratricopeptide repeat (TPR) containing protein | Sgta           | NP_078775    | 34       | 9             | cellular_component                                                                                                                        | binding, protein binding, protein heterodimerization activity, protein homodimerization activity                                                                                                       | biological_process                                                                                                                        |
| ribosomal protein, large P2                                            | Rplp2          | NP_080296    | 12       | 9             | cellular_component, intracellular, ribonucleoprotein complex, ribosome                                                                    | molecular_function, structural constituent of ribosome                                                                                                                                                 | biological_process, translational elongation                                                                                              |
| NADH dehydrogenase (ubiquinone) 1 beta subcomplex 8                    | Ndubf8         | NP_080337    | 22       | 9             | integral to membrane, membrane, mitochondrial inner membrane, mitochondrial respiratory chain complex I, mitochondrion, respiratory chain | NADH dehydrogenase (ubiquinone) activity, NADH dehydrogenase activity                                                                                                                                  | electron transport chain, mitochondrial electron transport, NADH to ubiquinone, transport                                                 |
| ribosomal protein S20                                                  | Rps20          | NP_080423    | 13       | 9             | intracellular, ribonucleoprotein complex, ribosome, small ribosomal subunit                                                               | RNA binding, structural constituent of ribosome                                                                                                                                                        | translation                                                                                                                               |
| dephospho-CoA kinase domain containing                                 | Dcakd          | NP_080827    | 26       | 9             | not classified                                                                                                                            | ATP binding, dephospho-CoA kinase activity, kinase activity, nucleotide binding                                                                                                                        | coenzyme A biosynthetic process                                                                                                           |
| sideroflexin 1                                                         | Sfxn1          | NP_081600    | 36       | 9             | integral to membrane, membrane, mitochondrial inner membrane, mitochondrion                                                               | cation transmembrane transporter activity, iron ion binding                                                                                                                                            | cation transport, erythrocyte differentiation, ion transport, iron ion transport, transport                                               |
| growth and transformation-dependent protein                            | 2310056P07 Rik | NP_081618    | 18       | 9             | integral to membrane, membrane                                                                                                            | not classified                                                                                                                                                                                         | not classified                                                                                                                            |
| acyl-Coenzyme A dehydrogenase family, member 10                        | Acad10         | NP_082313    | 119      | 9             | mitochondrion                                                                                                                             | acyl-CoA dehydrogenase activity, catalytic activity, electron carrier activity, FAD binding, hydrolase activity, oxidoreductase activity, oxidoreductase activity, acting on the CH-CH group of donors | metabolic process, oxidation reduction                                                                                                    |
| zinc finger protein 142                                                | Zfp142         | NP_084164    | 195      | 9             | not classified                                                                                                                            | not classified                                                                                                                                                                                         | not classified                                                                                                                            |
| sideroflexin 3                                                         | Sfxn3          | NP_444427    | 35       | 9             | integral to membrane, membrane, mitochondrion                                                                                             | cation transmembrane transporter activity, iron ion binding                                                                                                                                            | cation transport, ion transport, iron ion transport, transport                                                                            |
| heterogeneous nuclear ribonucleoprotein A3 isoform c                   | Hnrnpa3        | NP_444493    | 37       | 9             | nucleus, ribonucleoprotein complex, spliceosomal complex                                                                                  | nucleic acid binding, nucleotide binding, RNA binding                                                                                                                                                  | mRNA processing, RNA splicing                                                                                                             |
| splicing factor 3b, subunit 3                                          | Sf3b3          | NP_598714    | 136      | 9             | nucleus, spliceosomal complex                                                                                                             | nucleic acid binding                                                                                                                                                                                   | mRNA processing, RNA splicing                                                                                                             |
| glutathione S-transferase, theta 3                                     | Gstt3          | NP_598755    | 27       | 9             | cellular_component                                                                                                                        | glutathione transferase activity, transferase activity                                                                                                                                                 | glutathione metabolic process                                                                                                             |
| ionized calcium binding adapter molecule 2                             | 2810003C17 Rik | NP_660126    | 17       | 9             | not classified                                                                                                                            | calcium ion binding                                                                                                                                                                                    | not classified                                                                                                                            |

| Protein Name                                              | Gene Name    | Accession No | Mw (kDa) | Peptide Count | GO Component                                                                       | GO Function                                                                                                                                                                                                                                                                                                                      | GO Process                                                                                                                                                                                                                                                      |
|-----------------------------------------------------------|--------------|--------------|----------|---------------|------------------------------------------------------------------------------------|----------------------------------------------------------------------------------------------------------------------------------------------------------------------------------------------------------------------------------------------------------------------------------------------------------------------------------|-----------------------------------------------------------------------------------------------------------------------------------------------------------------------------------------------------------------------------------------------------------------|
| protein phosphatase 1, catalytic subunit, beta isoform    | Ppp1cb       | NP_766295    | 37       | 9             | cytoplasm                                                                          | hydrolase activity, iron ion binding, manganese ion binding, metal ion binding, phosphoprotein phosphatase activity, protein binding, protein serine/threonine phosphatase activity                                                                                                                                              | carbohydrate metabolic process, cell cycle, cell division, glycogen metabolic process, protein amino acid dephosphorylation                                                                                                                                     |
| hyaluronoglucosaminidase 3                                | Hyal3        | NP_821139    | 46       | 9             | extracellular region, lysosome                                                     | catalytic activity, hyaluronoglucosaminidase activity, hydrolase activity, hydrolase activity, acting on glycosyl bonds                                                                                                                                                                                                          | carbohydrate metabolic process, metabolic process                                                                                                                                                                                                               |
| PREDICTED: similar to 60S ribosomal protein L9 isoform 1  | LOC100048162 | XP_001480029 | 22       | 9             | not classified                                                                     | not classified                                                                                                                                                                                                                                                                                                                   | not classified                                                                                                                                                                                                                                                  |
| PREDICTED: similar to vesicle associated protein          | Sec31a       | XP_912694    | 144      | 9             | cytoplasm, cytoplasmic vesicle, endoplasmic reticulum, endosome, membrane          | not classified                                                                                                                                                                                                                                                                                                                   | protein transport, transport, vesicle-mediated transport                                                                                                                                                                                                        |
| xylulokinase homolog (H. influenzae)                      | Xylb         | NP_001028381 | 60       | 8             | not classified                                                                     | ATP binding, kinase activity, nucleotide binding, phosphotransferase activity, alcohol group as acceptor, transferase activity, xylulokinase activity                                                                                                                                                                            | carbohydrate metabolic process, D-xylulose metabolic process                                                                                                                                                                                                    |
| integrin alpha 1                                          | Itga1        | NP_001028400 | 131      | 8             | external side of plasma membrane, integral to membrane, integrin complex, membrane | calcium ion binding, magnesium ion binding, protein binding, receptor activity                                                                                                                                                                                                                                                   | cell adhesion, cellular extravasation, integrin-mediated signaling pathway, neutrophil chemotaxis                                                                                                                                                               |
| NADPH-dependent retinol dehydrogenase/reductase isoform 1 | Dhrs4        | NP_001033027 | 30       | 8             | mitochondrion, peroxisome                                                          | binding, carbonyl reductase (NADPH) activity, catalytic activity, oxidoreductase activity, retinal dehydrogenase activity                                                                                                                                                                                                        | metabolic process, oxidation reduction, retinal metabolic process                                                                                                                                                                                               |
| thioredoxin reductase 1 isoform 1                         | Txnr1        | NP_001035988 | 67       | 8             | cytoplasm, cytosol, nucleus                                                        | FAD binding, NADP or NADPH binding, oxidoreductase activity, selenium binding, thioredoxin-disulfide reductase activity                                                                                                                                                                                                          | cell proliferation, cell redox homeostasis, gastrulation, mesoderm formation, oxidation reduction                                                                                                                                                               |
| predicted gene, EG668668                                  | EG668668     | NP_001074505 | 30       | 8             | not classified                                                                     | not classified                                                                                                                                                                                                                                                                                                                   | not classified                                                                                                                                                                                                                                                  |
| ribosomal protein S16-like                                | LOC100039355 | NP_001103687 | 16       | 8             | not classified                                                                     | not classified                                                                                                                                                                                                                                                                                                                   | not classified                                                                                                                                                                                                                                                  |
| aconitase 1                                               | Aco1         | NP_031412    | 98       | 8             | cytoplasm, cytosol, endoplasmic reticulum, Golgi apparatus                         | 4 iron, 4 sulfur cluster binding, aconitate hydratase activity, iron ion binding, iron-responsive element binding, iron-sulfur cluster binding, lyase activity, metal ion binding, RNA binding                                                                                                                                   | cellular iron ion homeostasis, intestinal absorption, metabolic process, post-embryonic development, regulation of gene expression, regulation of translation, tricarboxylic acid cycle                                                                         |
| mannosidase 2, alpha 1                                    | Man2a1       | NP_032575    | 132      | 8             | Golgi apparatus, Golgi membrane, integral to membrane, membrane                    | alpha-mannosidase activity, hydrolase activity, hydrolase activity, acting on glycosyl bonds, hydrolase activity, hydrolyzing N-glycosyl compounds, hydrolase activity, hydrolyzing O-glycosyl compounds, mannosidase activity, mannosyl-oligosaccharide 1,3-1,6-alpha-mannosidase activity, metal ion binding, zinc ion binding | carbohydrate metabolic process, in utero embryonic development, liver development, lung alveolus development, mannose metabolic process, metabolic process, mitochondrion organization, N-glycan processing, respiratory gaseous exchange, vacuole organization |



| Protein Name                                                                           | Gene Name | Accession No | Mw (kDa) | Peptide Count | GO Component                                                                                                        | GO Function                                                                                                                                                                             | GO Process                                                                                                                                                                                   |
|----------------------------------------------------------------------------------------|-----------|--------------|----------|---------------|---------------------------------------------------------------------------------------------------------------------|-----------------------------------------------------------------------------------------------------------------------------------------------------------------------------------------|----------------------------------------------------------------------------------------------------------------------------------------------------------------------------------------------|
| cytochrome c oxidase subunit VIIa polypeptide 2-like                                   | Cox7a2l   | NP_033213    | 12       | 8             | membrane, mitochondrial inner membrane, mitochondrial respiratory chain, mitochondrion                              | cytochrome-c oxidase activity, electron carrier activity                                                                                                                                | not classified                                                                                                                                                                               |
| trans-golgi network protein                                                            | Tgoln1    | NP_033469    | 38       | 8             | Golgi apparatus, integral to membrane, membrane, plasma membrane, trans-Golgi network                               | not classified                                                                                                                                                                          | not classified                                                                                                                                                                               |
| chaperonin containing Tcp1, subunit 4 (delta)                                          | Cct4      | NP_033967    | 58       | 8             | chaperonin-containing T-complex, cytoplasm                                                                          | ATP binding, nucleotide binding, protein binding, unfolded protein binding                                                                                                              | cellular protein metabolic process, protein folding                                                                                                                                          |
| chaperonin containing Tcp1, subunit 6a (zeta)                                          | Cct6a     | NP_033968    | 58       | 8             | chaperonin-containing T-complex, cytoplasm                                                                          | ATP binding, nucleotide binding, protein binding, unfolded protein binding                                                                                                              | cellular protein metabolic process, protein folding                                                                                                                                          |
| fatty acid binding protein 3, muscle and heart                                         | Fabp3     | NP_034304    | 15       | 8             | cytoplasm                                                                                                           | binding, lipid binding, transporter activity                                                                                                                                            | phosphatidylcholine biosynthetic process, transport                                                                                                                                          |
| NADH dehydrogenase (ubiquinone) Fe-S protein 4                                         | Ndufs4    | NP_035017    | 18       | 8             | membrane, mitochondrial inner membrane, mitochondrial respiratory chain complex I, mitochondrion, respiratory chain | NADH dehydrogenase (ubiquinone) activity, oxidoreductase activity, acting on NADH or NADPH                                                                                              | electron transport chain, regulation of protein amino acid phosphorylation, transport                                                                                                        |
| ribosomal protein S7                                                                   | Rps7      | NP_035430    | 22       | 8             | intracellular, ribonucleoprotein complex, ribosome                                                                  | structural constituent of ribosome                                                                                                                                                      | translation                                                                                                                                                                                  |
| transaldolase 1                                                                        | Taldo1    | NP_035658    | 37       | 8             | cytoplasm                                                                                                           | catalytic activity, transaldolase activity, transferase activity                                                                                                                        | carbohydrate metabolic process, metabolic process, pentose-phosphate shunt                                                                                                                   |
| myosin, heavy polypeptide 11, smooth muscle                                            | Myh11     | NP_038635    | 223      | 8             | cytoplasm, muscle myosin complex, myosin complex, myosin filament, smooth muscle contractile fiber, stress fiber    | actin binding, ATP binding, calmodulin binding, motor activity, nucleotide binding                                                                                                      | smooth muscle contraction                                                                                                                                                                    |
| solute carrier family 25 (mitochondrial carrier, dicarboxylate transporter), member 10 | Slc25a10  | NP_038798    | 32       | 8             | integral to membrane, membrane, mitochondrial inner membrane, mitochondrion                                         | binding, secondary active transmembrane transporter activity                                                                                                                            | mitochondrial transport, transport                                                                                                                                                           |
| ERO1-like                                                                              | Ero1l     | NP_056589    | 54       | 8             | endoplasmic reticulum, endoplasmic reticulum membrane, integral to endoplasmic reticulum membrane, membrane         | electron carrier activity, FAD binding, oxidoreductase activity, oxidoreductase activity, acting on sulfur group of donors, disulfide as acceptor, protein binding                      | brown fat cell differentiation, electron transport chain, endoplasmic reticulum unfolded protein response, oxidation reduction, protein folding, protein thiol-disulfide exchange, transport |
| keratin complex 2, basic gene 18                                                       | Krt85     | NP_058575    | 56       | 8             | intermediate filament, keratin filament                                                                             | structural molecule activity                                                                                                                                                            | not classified                                                                                                                                                                               |
| USO1 homolog, vesicle docking protein                                                  | Uso1      | NP_062363    | 107      | 8             | cytoplasm, cytosol, Golgi apparatus, Golgi membrane, membrane, microsome, perinuclear region of cytoplasm           | binding, protein binding, protein transporter activity                                                                                                                                  | intracellular protein transport, protein transport, transport, vesicle fusion with Golgi apparatus, vesicle-mediated transport                                                               |
| chloride channel Kb                                                                    | Cicnkb    | NP_062675    | 75       | 8             | cellular_component, chloride channel complex, integral to membrane, membrane                                        | chloride channel activity, chloride ion binding, ion channel activity, molecular_function, protein binding, voltage-gated chloride channel activity, voltage-gated ion channel activity | biological_process, chloride transport, ion transport, transport                                                                                                                             |

| Protein Name                                      | Gene Name | Accession No | Mw (kDa) | Peptide Count | GO Component                                                                                                                      | GO Function                                                                                                                                                                                     | GO Process                                                                                                                                                          |
|---------------------------------------------------|-----------|--------------|----------|---------------|-----------------------------------------------------------------------------------------------------------------------------------|-------------------------------------------------------------------------------------------------------------------------------------------------------------------------------------------------|---------------------------------------------------------------------------------------------------------------------------------------------------------------------|
| non-metastatic cells 3, protein expressed in      | Nme3      | NP_062704    | 19       | 8             | not classified                                                                                                                    | ATP binding, kinase activity, magnesium ion binding, metal ion binding, nucleoside diphosphate kinase activity, nucleotide binding, transferase activity                                        | CTP biosynthetic process, GTP biosynthetic process, nucleotide metabolic process, UTP biosynthetic process                                                          |
| acyl-CoA thioesterase 9                           | Acot9     | NP_062710    | 51       | 8             | mitochondrion                                                                                                                     | acyl-CoA thioesterase activity, carboxylesterase activity, hydrolase activity, palmitoyl-CoA hydrolase activity                                                                                 | not classified                                                                                                                                                      |
| fumarylacetoacetate hydrolase domain containing 1 | Fahd1     | NP_075969    | 25       | 8             | mitochondrial inner membrane, mitochondrion                                                                                       | calcium ion binding, catalytic activity, hydrolase activity, magnesium ion binding, metal ion binding                                                                                           | metabolic process                                                                                                                                                   |
| Sec61 beta subunit                                | Sec61b    | NP_077133    | 10       | 8             | cellular_component, endoplasmic reticulum, integral to membrane, membrane                                                         | ribosome binding                                                                                                                                                                                | biological_process, protein transport, transmembrane transport, transport                                                                                           |
| vacuolar H+ ATPase G1                             | Atp6v1g1  | NP_077135    | 14       | 8             | cytosol, intracellular, lysosomal membrane, plasma membrane, synaptic vesicle, vacuolar proton-transporting V-type ATPase complex | ATPase activity, hydrogen-exporting ATPase activity, phosphorylative mechanism, hydrolase activity, acting on acid anhydrides, catalyzing transmembrane movement of substances, protein binding | ion transport, proton transport, transport                                                                                                                          |
| chloride channel Ka                               | Clcnka    | NP_077723    | 76       | 8             | chloride channel complex, integral to membrane, membrane                                                                          | chloride channel activity, chloride ion binding, ion channel activity, protein binding, voltage-gated chloride channel activity, voltage-gated ion channel activity                             | chloride transport, ion transport, regulation of body fluid levels, transport                                                                                       |
| brain protein 17 isoform 2                        | Pnkd      | NP_079856    | 16       | 8             | cytoplasm, membrane, mitochondrion, nucleus                                                                                       | hydrolase activity, hydroxyacylglutathione hydrolase activity, metal ion binding, molecular_function, zinc ion binding                                                                          | biological_process                                                                                                                                                  |
| ribosomal protein S13                             | Rps13     | NP_080809    | 17       | 8             | intracellular, ribonucleoprotein complex, ribosome                                                                                | structural constituent of ribosome                                                                                                                                                              | translation                                                                                                                                                         |
| transmembrane emp24 domain-containing protein 10  | Tmed10    | NP_081051    | 25       | 8             | cis-Golgi network, Golgi apparatus, integral to membrane, membrane, zymogen granule membrane                                      | not classified                                                                                                                                                                                  | intracellular protein transport, protein transport, regulated secretory pathway, transport, vesicle targeting, to, from or within Golgi, vesicle-mediated transport |
| protein disulfide isomerase-associated 6          | Pdia6     | NP_082235    | 49       | 8             | endoplasmic reticulum                                                                                                             | isomerase activity, protein disulfide isomerase activity                                                                                                                                        | cell redox homeostasis                                                                                                                                              |
| citrate lyase beta like                           | Clybl     | NP_083832    | 38       | 8             | cellular_component, citrate lyase complex, mitochondrion                                                                          | carbon-carbon lyase activity, catalytic activity, citrate (pro-3S)-lyase activity, lyase activity, magnesium ion binding, metal ion binding, molecular_function                                 | biological_process, cellular aromatic compound metabolic process                                                                                                    |
| mitochondrial ribosomal protein S2                | Mrps2     | NP_536700    | 32       | 8             | intracellular, mitochondrion, ribonucleoprotein complex, ribosome, small ribosomal subunit                                        | structural constituent of ribosome                                                                                                                                                              | translation                                                                                                                                                         |
| apolipoprotein A-I binding protein                | Apoa1bp   | NP_659146    | 31       | 8             | cellular_component, extracellular region                                                                                          | protein binding                                                                                                                                                                                 | biological_process                                                                                                                                                  |

| Protein Name                                                              | Gene Name      | Accession No | Mw (kDa) | Peptide Count | GO Component                                                                                            | GO Function                                                                                                                                                                                                                                 | GO Process                                                                                                    |
|---------------------------------------------------------------------------|----------------|--------------|----------|---------------|---------------------------------------------------------------------------------------------------------|---------------------------------------------------------------------------------------------------------------------------------------------------------------------------------------------------------------------------------------------|---------------------------------------------------------------------------------------------------------------|
| archain 1                                                                 | Arcn1          | NP_666097    | 57       | 8             | cellular_component, clathrin adaptor complex, cytoplasm, cytoplasmic vesicle, Golgi apparatus, membrane | molecular_function, protein binding                                                                                                                                                                                                         | biological_process, intracellular protein transport, protein transport, transport, vesicle-mediated transport |
| pyridoxal (pyridoxine, vitamin B6) kinase                                 | Pdxk           | NP_742146    | 35       | 8             | cytoplasm                                                                                               | ATP binding, kinase activity, metal ion binding, nucleotide binding, pyridoxal kinase activity, transferase activity, zinc ion binding                                                                                                      | pyridoxine biosynthetic process                                                                               |
| 4-aminobutyrate aminotransferase                                          | Abat           | NP_766549    | 56       | 8             | mitochondrion                                                                                           | (S)-3-amino-2-methylpropionate transaminase activity, 4-aminobutyrate transaminase activity, catalytic activity, pyridoxal phosphate binding, transaminase activity, transferase activity                                                   | behavioral response to cocaine, gamma-aminobutyric acid metabolic process, neurotransmitter catabolic process |
| hypothetical protein LOC223665                                            | C030006K11 Rik | NP_789798    | 24       | 8             | not classified                                                                                          | not classified                                                                                                                                                                                                                              | not classified                                                                                                |
| UDP glucuronosyltransferase 1 family, polypeptide A7C                     | Ugt1a7c        | NP_964004    | 60       | 8             | endoplasmic reticulum, integral to membrane, membrane, microsome                                        | glucuronosyltransferase activity, transferase activity, transferase activity, transferring glycosyl groups, transferase activity, transferring hexosyl groups                                                                               | metabolic process                                                                                             |
| PREDICTED: similar to serine beta lactamase-like protein LACT-1 isoform 2 | LOC677144      | XP_001004138 | 61       | 8             | not classified                                                                                          | not classified                                                                                                                                                                                                                              | not classified                                                                                                |
| PREDICTED: similar to Nedd4 binding protein 2                             | LOC100044124   | XP_001474752 | 137      | 8             | not classified                                                                                          | not classified                                                                                                                                                                                                                              | not classified                                                                                                |
| PREDICTED: hypothetical protein                                           | LOC634990      | XP_914990    | 16       | 8             | not classified                                                                                          | not classified                                                                                                                                                                                                                              | not classified                                                                                                |
| NADH dehydrogenase (ubiquinone) Fe-S protein 5                            | Ndufs5         | NP_001025445 | 13       | 7             | mitochondrion                                                                                           | not classified                                                                                                                                                                                                                              | not classified                                                                                                |
| hypothetical protein LOC67809                                             | 1200015F23 Rik | NP_001028308 | 52       | 7             | cytoplasm, integral to membrane, membrane, microtubule, mitochondrion, nucleus                          | binding                                                                                                                                                                                                                                     | apoptosis, cell differentiation                                                                               |
| adenylate kinase 2 isoform a                                              | Ak2            | NP_001029138 | 26       | 7             | mitochondrial inner membrane, mitochondrion                                                             | adenylate kinase activity, ATP binding, kinase activity, nucleobase, nucleoside, nucleotide kinase activity, nucleotide binding, nucleotide kinase activity, phosphotransferase activity, phosphate group as acceptor, transferase activity | nucleobase, nucleoside, nucleotide and nucleic acid metabolic process                                         |
| argininosuccinate synthetase                                              | Ass1           | NP_031520    | 47       | 7             | mitochondrion                                                                                           | argininosuccinate synthase activity, ATP binding, ligase activity, nucleotide binding                                                                                                                                                       | arginine biosynthetic process, cellular amino acid biosynthetic process, urea cycle                           |
| dynactin 1                                                                | Dctn1          | NP_031861    | 142      | 7             | cell leading edge, cytoplasm, cytoskeleton, dynein complex, microtubule                                 | motor activity, protein binding                                                                                                                                                                                                             | not classified                                                                                                |
| selenium binding protein 1                                                | Selenbp1       | NP_033176    | 53       | 7             | cytoplasm, membrane, nucleus                                                                            | selenium binding                                                                                                                                                                                                                            | brown fat cell differentiation, protein transport, transport                                                  |
| dihydropyrimidinase-like 2                                                | Dpysl2         | NP_034085    | 62       | 7             | axon, cell soma, cytoplasm, dendrite, mitochondrion                                                     | hydrolase activity                                                                                                                                                                                                                          | cell differentiation, multicellular organismal development, nervous system development                        |
| D-dopachrome tautomerase                                                  | Ddt            | NP_034157    | 13       | 7             | cytoplasm                                                                                               | D-dopachrome decarboxylase activity, lyase activity                                                                                                                                                                                         | melanin biosynthetic process                                                                                  |
| dynein cytoplasmic 1 intermediate chain 2                                 | Dync1i2        | NP_034194    | 68       | 7             | dynein complex, microtubule                                                                             | motor activity                                                                                                                                                                                                                              | not classified                                                                                                |
| eukaryotic translation initiation factor 3, subunit 10 (theta)            | Eif3s10        | NP_034253    | 162      | 7             | cytoplasm, eukaryotic translation initiation factor 3 complex, nucleus                                  | protein binding, translation initiation factor activity                                                                                                                                                                                     | formation of translation initiation complex, translation                                                      |

| Protein Name                                                                            | Gene Name | Accession No | Mw (kDa) | Peptide Count | GO Component                                                                                                    | GO Function                                                                                                               | GO Process                                                                                                                                                                   |
|-----------------------------------------------------------------------------------------|-----------|--------------|----------|---------------|-----------------------------------------------------------------------------------------------------------------|---------------------------------------------------------------------------------------------------------------------------|------------------------------------------------------------------------------------------------------------------------------------------------------------------------------|
| keratin complex 2, basic, gene 17                                                       | Krt2      | NP_034798    | 71       | 7             | intermediate filament, keratin filament                                                                         | structural molecule activity                                                                                              | not classified                                                                                                                                                               |
| macrophage migration inhibitory factor                                                  | Mif       | NP_034928    | 13       | 7             | cytoplasm, extracellular region, extracellular space                                                            | cytokine activity, dopachrome isomerase activity, isomerase activity, phenylpyruvate tautomerase activity                 | cell aging, DNA damage response, signal transduction by p53 class mediator, immune response, inflammatory response, innate immune response, regulation of cell proliferation |
| proteasome (prosome, macropain) 28 subunit, alpha                                       | Psme1     | NP_035319    | 29       | 7             | proteasome activator complex, proteasome complex                                                                | proteasome activator activity, protein binding                                                                            | antigen processing and presentation of exogenous antigen                                                                                                                     |
| cytoplasmic FMR1 interacting protein 1                                                  | Cyfp1     | NP_035500    | 145      | 7             | cell junction, cell projection, cytoplasm, lamellipodium, perinuclear region of cytoplasm, synapse, synaptosome | actin binding, profilin binding                                                                                           | cell differentiation, lamellipodium assembly, multicellular organismal development, nervous system development, regulation of cell shape                                     |
| solute carrier family 4 (anion exchanger), member 1                                     | Slc4a1    | NP_035533    | 103      | 7             | basolateral plasma membrane, cortical cytoskeleton, integral to membrane, membrane                              | anion exchanger activity, anion transmembrane transporter activity, inorganic anion exchanger activity, protein binding   | anion transport, chloride transport, ion transport, transport                                                                                                                |
| tyrosine 3-monooxygenase/tryptophan 5-monooxygenase activation protein, eta polypeptide | Ywhah     | NP_035868    | 28       | 7             | cytoplasm                                                                                                       | actin binding, protein binding, protein domain specific binding                                                           | cytoskeleton organization, intracellular protein transport, negative regulation of apoptosis, negative regulation of dendrite morphogenesis, regulation of mitosis           |
| brain protein 44-like                                                                   | Brp44l    | NP_061289    | 12       | 7             | mitochondrial inner membrane, mitochondrion                                                                     | molecular_function                                                                                                        | biological_process                                                                                                                                                           |
| staphylococcal nuclease domain containing 1                                             | Snd1      | NP_062750    | 102      | 7             | cellular_component, cytoplasm, nucleus, RNA induced silencing complex                                           | hydrolase activity, acting on ester bonds, nuclease activity, nucleic acid binding, protein binding                       | biological_process, regulation of transcription, RNA interference, transcription                                                                                             |
| nucleoporin 160                                                                         | Nup160    | NP_067487    | 158      | 7             | nuclear pore, nucleus                                                                                           | nucleocytoplasmic transporter activity                                                                                    | mRNA export from nucleus, mRNA transport, protein transport, transmembrane transport, transport                                                                              |
| nicotinamide phosphoribosyltransferase                                                  | Nampt     | NP_067499    | 55       | 7             | cytoplasm                                                                                                       | nicotinamide phosphoribosyltransferase activity, transferase activity, transferase activity, transferring glycosyl groups | NAD biosynthetic process, pyridine nucleotide biosynthetic process                                                                                                           |
| ribosomal protein L23                                                                   | Rpl23     | NP_075029    | 15       | 7             | cytosolic ribosome, intracellular, nucleolus, ribonucleoprotein complex, ribosome                               | structural constituent of ribosome                                                                                        | translation                                                                                                                                                                  |
| cell line NK14 derived transforming oncogene                                            | Rab8a     | NP_075615    | 24       | 7             | membrane, plasma membrane                                                                                       | GTP binding, nucleotide binding, protein binding                                                                          | protein transport, small GTPase mediated signal transduction, transport                                                                                                      |
| blood vessel epicardial substance                                                       | Bves      | NP_077247    | 41       | 7             | integral to membrane, membrane                                                                                  | not classified                                                                                                            | not classified                                                                                                                                                               |
| coiled-coil-helix-coiled-coil-helix domain containing 6                                 | Chchd6    | NP_079627    | 30       | 7             | cellular_component                                                                                              | molecular_function                                                                                                        | biological_process                                                                                                                                                           |
| ubiquinol-cytochrome c reductase hinge protein                                          | Uqcrh     | NP_079917    | 10       | 7             | membrane, mitochondrial inner membrane, mitochondrion, respiratory chain                                        | ubiquinol-cytochrome-c reductase activity                                                                                 | electron transport chain, mitochondrial electron transport, ubiquinol to cytochrome c, transport                                                                             |

| Protein Name                                        | Gene Name | Accession No | Mw (kDa) | Peptide Count | GO Component                                                                                                   | GO Function                                                                                                                                                                                                                                                              | GO Process                                                                                                                                                                                                                                           |
|-----------------------------------------------------|-----------|--------------|----------|---------------|----------------------------------------------------------------------------------------------------------------|--------------------------------------------------------------------------------------------------------------------------------------------------------------------------------------------------------------------------------------------------------------------------|------------------------------------------------------------------------------------------------------------------------------------------------------------------------------------------------------------------------------------------------------|
| UMP-CMP kinase                                      | Cmpk      | NP_079923    | 26       | 7             | cytoplasm, nucleus                                                                                             | ATP binding, cytidylate kinase activity, kinase activity, nucleobase, nucleoside, nucleotide kinase activity, nucleotide binding, nucleotide kinase activity, phosphotransferase activity, phosphate group as acceptor, transferase activity                             | nucleobase, nucleoside, nucleotide and nucleic acid metabolic process, pyrimidine nucleotide biosynthetic process                                                                                                                                    |
| thioesterase superfamily member 2                   | Them2     | NP_080066    | 15       | 7             | cytoplasm, mitochondrion                                                                                       | hydrolase activity                                                                                                                                                                                                                                                       | not classified                                                                                                                                                                                                                                       |
| actin related protein 2/3 complex, subunit 4        | Arpc4     | NP_080828    | 20       | 7             | Arp2/3 protein complex, cell projection, cytoplasm, cytoskeleton                                               | actin binding, molecular_function                                                                                                                                                                                                                                        | actin filament polymerization, biological_process                                                                                                                                                                                                    |
| cingulin-like 1                                     | Cgnl1     | NP_080875    | 148      | 7             | actin cytoskeleton, apical junction complex, cell junction, myosin complex, tight junction                     | molecular_function, motor activity                                                                                                                                                                                                                                       | biological_process                                                                                                                                                                                                                                   |
| keratin 33A                                         | Krt33a    | NP_082259    | 46       | 7             | cellular_component, intermediate filament                                                                      | protein binding, structural molecule activity                                                                                                                                                                                                                            | biological_process                                                                                                                                                                                                                                   |
| SAC1 (supressor of actin mutations 1, homolog)-like | Sacm1l    | NP_109617    | 67       | 7             | cellular_component, endoplasmic reticulum, integral to membrane, membrane                                      | hydrolase activity, molecular_function                                                                                                                                                                                                                                   | biological_process                                                                                                                                                                                                                                   |
| keratin 82                                          | Krt82     | NP_444479    | 57       | 7             | intermediate filament, keratin filament                                                                        | structural molecule activity                                                                                                                                                                                                                                             | not classified                                                                                                                                                                                                                                       |
| argininosuccinate lyase                             | Asl       | NP_598529    | 52       | 7             | not classified                                                                                                 | argininosuccinate lyase activity, catalytic activity, lyase activity                                                                                                                                                                                                     | ammonia assimilation cycle, arginine biosynthetic process, arginine biosynthetic process via ornithine, cellular amino acid biosynthetic process, cellular amino acid metabolic process, locomotory behavior, post-embryonic development, urea cycle |
| nuclear mitotic apparatus protein 1                 | Numa1     | NP_598708    | 236      | 7             | nucleus                                                                                                        | tubulin binding                                                                                                                                                                                                                                                          | not classified                                                                                                                                                                                                                                       |
| LRP16 protein                                       | Macro1    | NP_598908    | 27       | 7             | mitochondrion                                                                                                  | not classified                                                                                                                                                                                                                                                           | not classified                                                                                                                                                                                                                                       |
| malic enzyme 2, NAD(+)-dependent, mitochondrial     | Me2       | NP_663469    | 66       | 7             | mitochondrion                                                                                                  | binding, catalytic activity, malate dehydrogenase (oxaloacetate-decarboxylating) activity, malic enzyme activity, metal ion binding, NAD or NADH binding, oxidoreductase activity, oxidoreductase activity, acting on the CH-OH group of donors, NAD or NADP as acceptor | malate metabolic process, metabolic process, oxidation reduction                                                                                                                                                                                     |
| plastin 3 precursor                                 | Pls3      | NP_663604    | 71       | 7             | cytoplasm                                                                                                      | actin binding, calcium ion binding, molecular_function                                                                                                                                                                                                                   | biological_process                                                                                                                                                                                                                                   |
| leucyl/cystinyl aminopeptidase                      | Lnpep     | NP_766415    | 117      | 7             | integral to membrane, membrane, membrane fraction, microsome, perinuclear region of cytoplasm, plasma membrane | aminopeptidase activity, hydrolase activity, metal ion binding, metallopeptidase activity, peptidase activity, protein binding, zinc ion binding                                                                                                                         | protein catabolic process, proteolysis                                                                                                                                                                                                               |

| Protein Name                                         | Gene Name         | Accession No | Mw (kDa) | Peptide Count | GO Component                                                                                                                                                | GO Function                                                                                                                                             | GO Process                                                                                                                                                                                                                                                                 |
|------------------------------------------------------|-------------------|--------------|----------|---------------|-------------------------------------------------------------------------------------------------------------------------------------------------------------|---------------------------------------------------------------------------------------------------------------------------------------------------------|----------------------------------------------------------------------------------------------------------------------------------------------------------------------------------------------------------------------------------------------------------------------------|
| sulfite oxidase                                      | Suox              | NP_776094    | 61       | 7             | mitochondrion                                                                                                                                               | electron carrier activity, heme binding, iron ion binding, metal ion binding, molybdenum ion binding, oxidoreductase activity, sulfite oxidase activity | oxidation reduction                                                                                                                                                                                                                                                        |
| eukaryotic translation initiation factor 5A          | Eif5a             | NP_853613    | 17       | 7             | cytoplasm, endoplasmic reticulum, membrane, nuclear pore, nucleus                                                                                           | ribosome binding, RNA binding, translation elongation factor activity                                                                                   | apoptosis, mRNA transport, peptidyl-lysine modification to hypusine, positive regulation of translational elongation, positive regulation of translational termination, protein transport, translation, translational frameshifting, transmembrane transport, transport    |
| DEAD (Asp-Glu-Ala-Asp) box polypeptide 39            | Ddx39             | NP_932099    | 49       | 7             | nucleus                                                                                                                                                     | ATP binding, ATP-dependent helicase activity, helicase activity, hydrolase activity, nucleic acid binding, nucleotide binding                           | mRNA processing, RNA splicing                                                                                                                                                                                                                                              |
| UDP glucuronosyltransferase 1 family, polypeptide A1 | Ugt1a1            | NP_964007    | 60       | 7             | endoplasmic reticulum, integral to membrane, integral to plasma membrane, membrane, microsome                                                               | glucuronosyltransferase activity, transferase activity, transferring glycosyl groups, transferase activity, transferring hexosyl groups                 | metabolic process                                                                                                                                                                                                                                                          |
| PREDICTED: similar to ribosomal protein L28          | LOC100039731      | XP_001473974 | 16       | 7             | not classified                                                                                                                                              | not classified                                                                                                                                          | not classified                                                                                                                                                                                                                                                             |
| PREDICTED: hypothetical protein                      | LOC100047156      | XP_001477347 | 24       | 7             | not classified                                                                                                                                              | not classified                                                                                                                                          | not classified                                                                                                                                                                                                                                                             |
| UDP-N-acetylglucosamine pyrophosphorylase 1-like 1   | Uap111            | NP_001028465 | 57       | 6             | not classified                                                                                                                                              | nucleotidyltransferase activity, transferase activity                                                                                                   | metabolic process                                                                                                                                                                                                                                                          |
| tetratricopeptide repeat domain 38                   | Ttc38             | NP_001028509 | 52       | 6             | not classified                                                                                                                                              | binding                                                                                                                                                 | not classified                                                                                                                                                                                                                                                             |
| hypothetical protein LOC654795                       | 2310014G06Rik     | NP_001076444 | 31       | 6             | not classified                                                                                                                                              | binding, catalytic activity, coenzyme binding                                                                                                           | cellular metabolic process, metabolic process                                                                                                                                                                                                                              |
| radixin isoform a                                    | Rdx               | NP_001098086 | 69       | 6             | apical part of cell, cytoplasm, cytoskeleton, extrinsic to membrane, filopodium, lamellipodium membrane, microvillus, plasma membrane, ruffle, stereocilium | actin binding, binding, cytoskeletal protein binding, protein binding                                                                                   | actin filament capping, apical protein localization, microvillus assembly                                                                                                                                                                                                  |
| ribosomal protein L18A family member                 | OTTMUSG0000021609 | NP_001104586 | 22       | 6             | not classified                                                                                                                                              | not classified                                                                                                                                          | not classified                                                                                                                                                                                                                                                             |
| alcohol dehydrogenase 1 (class I)                    | Adh1              | NP_031435    | 40       | 6             | cytoplasm, intracellular, mitochondrion                                                                                                                     | alcohol dehydrogenase (NAD) activity, metal ion binding, oxidoreductase activity, protein homodimerization activity, zinc ion binding                   | behavioral response to ethanol, ethanol catabolic process, oxidation reduction, response to retinoic acid, response to steroid hormone stimulus, response to testosterone stimulus, retinoic acid metabolic process, retinoid metabolic process, retinol metabolic process |

| Protein Name                                      | Gene Name | Accession No | Mw (kDa) | Peptide Count | GO Component                                                                                                                                                                                                         | GO Function                                                                                                                      | GO Process                                                                                                                                  |
|---------------------------------------------------|-----------|--------------|----------|---------------|----------------------------------------------------------------------------------------------------------------------------------------------------------------------------------------------------------------------|----------------------------------------------------------------------------------------------------------------------------------|---------------------------------------------------------------------------------------------------------------------------------------------|
| chondroitin sulfate proteoglycan 6                | Smc3      | NP_031816    | 142      | 6             | chromosome, lateral element, nucleus                                                                                                                                                                                 | ATP binding, nucleotide binding, protein binding                                                                                 | cell cycle, cell division, chromosome organization, DNA repair, meiosis, mitosis, response to DNA damage stimulus                           |
| ferredoxin reductase                              | Fdxr      | NP_032023    | 54       | 6             | mitochondrial inner membrane, mitochondrion                                                                                                                                                                          | electron carrier activity, ferredoxin-NADP+ reductase activity, oxidoreductase activity                                          | cholesterol metabolic process, electron transport chain, lipid metabolic process, oxidation reduction, steroid metabolic process, transport |
| karyopherin (importin) beta 1                     | Kpnb1     | NP_032405    | 97       | 6             | cytoplasm, nucleus                                                                                                                                                                                                   | binding, protein binding, protein transporter activity                                                                           | intracellular protein transport, protein import into nucleus, protein transport, ribosomal protein import into nucleus, transport           |
| alanyl (membrane) aminopeptidase                  | Anpep     | NP_032512    | 110      | 6             | integral to membrane, membrane                                                                                                                                                                                       | aminopeptidase activity, hydrolase activity, metal ion binding, metalloproteinase activity, peptidase activity, zinc ion binding | angiogenesis, cell differentiation, multicellular organismal development, proteolysis                                                       |
| lysophospholipase 1                               | Lypla1    | NP_032892    | 25       | 6             | cytoplasm, mitochondrion                                                                                                                                                                                             | hydrolase activity                                                                                                               | fatty acid metabolic process, lipid metabolic process                                                                                       |
| ribosomal protein L12                             | Rpl12     | NP_033102    | 18       | 6             | cytoplasm, nucleolus, nucleus, ribonucleoprotein complex, ribosome                                                                                                                                                   | protein binding, RNA binding, structural constituent of ribosome                                                                 | biological_process, translation                                                                                                             |
| indolethylamine N-methyltransferase               | Inmt      | NP_033375    | 29       | 6             | cytoplasm                                                                                                                                                                                                            | amine N-methyltransferase activity, methyltransferase activity, transferase activity                                             | not classified                                                                                                                              |
| ATPase, H+ transporting, lysosomal V0 subunit C   | Atp6v0c   | NP_033859    | 16       | 6             | integral to membrane, membrane, proton-transporting two-sector ATPase complex, proton-transporting domain, proton-transporting V-type ATPase, V0 domain, vacuolar proton-transporting V-type ATPase complex, vacuole | hydrogen ion transmembrane transporter activity, hydrogen-exporting ATPase activity, phosphorylative mechanism, protein binding  | ATP synthesis coupled proton transport, ion transport, lysosomal lumen acidification, proton transport, transport, vacuolar acidification   |
| chaperonin subunit 8 (theta)                      | Cct8      | NP_033970    | 60       | 6             | cytoplasm                                                                                                                                                                                                            | ATP binding, nucleotide binding, protein binding, unfolded protein binding                                                       | cellular protein metabolic process, protein folding                                                                                         |
| glycerol phosphate dehydrogenase 2, mitochondrial | Gpd2      | NP_034404    | 81       | 6             | glycerol-3-phosphate dehydrogenase complex, membrane, mitochondrial inner membrane, mitochondrion                                                                                                                    | calcium ion binding, glycerol-3-phosphate dehydrogenase activity, oxidoreductase activity                                        | gluconeogenesis, glycerol-3-phosphate metabolic process, oxidation reduction                                                                |

| Protein Name                                                        | Gene Name | Accession No | Mw (kDa) | Peptide Count | GO Component                                                                             | GO Function                                                                                                                                                                                                                                    | GO Process                                                                                                                                                                                                                                                                                                                                                                                                                                                                                                                     |
|---------------------------------------------------------------------|-----------|--------------|----------|---------------|------------------------------------------------------------------------------------------|------------------------------------------------------------------------------------------------------------------------------------------------------------------------------------------------------------------------------------------------|--------------------------------------------------------------------------------------------------------------------------------------------------------------------------------------------------------------------------------------------------------------------------------------------------------------------------------------------------------------------------------------------------------------------------------------------------------------------------------------------------------------------------------|
| high mobility group box 1                                           | Hmgb1     | NP_034569    | 25       | 6             | chromosome, cytoplasm, extracellular space, neuron projection, nucleus, soluble fraction | bent DNA binding, calcium-dependent protein kinase regulator activity, crossed form four-way junction DNA binding, cytokine activity, DNA binding, heparin binding, open form four-way junction DNA binding, protein kinase activator activity | DNA geometric change, eye development, induction of positive chemotaxis, lung development, positive regulation of cell migration, positive regulation of gene-specific transcription from RNA polymerase II promoter, positive regulation of glycogen catabolic process, positive regulation of mesenchymal cell proliferation, positive regulation of mitotic cell cycle, positive regulation of myeloid cell differentiation, positive regulation of protein amino acid phosphorylation, response to glucocorticoid stimulus |
| heterochromatin protein 1, binding protein 3                        | Hp1bp3    | NP_034600    | 61       | 6             | chromosome, nucleosome, nucleus                                                          | DNA binding                                                                                                                                                                                                                                    | nucleosome assembly                                                                                                                                                                                                                                                                                                                                                                                                                                                                                                            |
| lamin B2                                                            | Lmnb2     | NP_034852    | 67       | 6             | intermediate filament, lamin filament, membrane, nucleus                                 | structural molecule activity                                                                                                                                                                                                                   | not classified                                                                                                                                                                                                                                                                                                                                                                                                                                                                                                                 |
| KH domain containing, RNA binding, signal transduction associated 1 | Khdrbs1   | NP_035447    | 48       | 6             | membrane, nucleus                                                                        | protein binding, RNA binding, SH3 domain binding, SH3/SH2 adaptor activity, transcription repressor activity                                                                                                                                   | cell cycle, cell surface receptor linked signal transduction, negative regulation of transcription, regulation of RNA export from nucleus, regulation of transcription, transcription                                                                                                                                                                                                                                                                                                                                          |
| myosin XVIIIa                                                       | Myo18a    | NP_035716    | 231      | 6             | cytoplasm, cytoskeleton, myosin complex                                                  | ATP binding, molecular_function, motor activity, nucleotide binding, protein binding                                                                                                                                                           | biological_process                                                                                                                                                                                                                                                                                                                                                                                                                                                                                                             |
| thioredoxin 1                                                       | Txn1      | NP_035790    | 12       | 6             | cytosol, mitochondrion, nucleus                                                          | peptide disulfide oxidoreductase activity, protein binding                                                                                                                                                                                     | cell redox homeostasis, electron transport chain, negative regulation of protein export from nucleus, negative regulation of transcription from RNA polymerase II promoter, transport                                                                                                                                                                                                                                                                                                                                          |
| ubiquitin-activating enzyme E1, Chr Y 1                             | Ube1y1    | NP_035797    | 118      | 6             | not classified                                                                           | ATP binding, binding, catalytic activity, ligase activity, nucleotide binding, small protein activating enzyme activity                                                                                                                        | metabolic process, modification-dependent protein catabolic process, protein modification process                                                                                                                                                                                                                                                                                                                                                                                                                              |
| caseinolytic protease X isoform 1                                   | Clpx      | NP_035932    | 69       | 6             | mitochondrial inner membrane, mitochondrion                                              | ATP binding, ATPase activity, metal ion binding, nucleoside-triphosphatase activity, nucleotide binding, protein binding, unfolded protein binding, zinc ion binding                                                                           | protein folding                                                                                                                                                                                                                                                                                                                                                                                                                                                                                                                |
| proteasome (prosome, macropain) subunit, alpha type 1               | Psma1     | NP_036095    | 30       | 6             | cytoplasm, nucleus, proteasome complex, proteasome core complex                          | endopeptidase activity, hydrolase activity, peptidase activity, protein binding, threonine-type endopeptidase activity                                                                                                                         | proteolysis involved in cellular protein catabolic process, ubiquitin-dependent protein catabolic process                                                                                                                                                                                                                                                                                                                                                                                                                      |
| guanine nucleotide-binding protein, beta-4 subunit                  | Gnb4      | NP_038559    | 37       | 6             | heterotrimeric G-protein complex                                                         | GTPase activity, signal transducer activity                                                                                                                                                                                                    | G-protein coupled receptor protein signaling pathway, signal transduction                                                                                                                                                                                                                                                                                                                                                                                                                                                      |



| Protein Name                                                   | Gene Name | Accession No | Mw (kDa) | Peptide Count | GO Component                                                                                                          | GO Function                                                                                                                                 | GO Process                                                                                                                                               |
|----------------------------------------------------------------|-----------|--------------|----------|---------------|-----------------------------------------------------------------------------------------------------------------------|---------------------------------------------------------------------------------------------------------------------------------------------|----------------------------------------------------------------------------------------------------------------------------------------------------------|
| estradiol 17 beta-dehydrogenase 8                              | H2-Ke6    | NP_038571    | 27       | 6             | membrane fraction, mitochondrial envelope, mitochondrion, plasma membrane                                             | binding, catalytic activity, estradiol 17-beta-dehydrogenase activity, oxidoreductase activity, testosterone 17-beta-dehydrogenase activity | androgen metabolic process, estrogen metabolic process, lipid biosynthetic process, metabolic process, oxidation reduction, steroid biosynthetic process |
| myxovirus (influenza virus) resistance 2                       | Mx2       | NP_038634    | 74       | 6             | cytoplasm                                                                                                             | GTP binding, GTPase activity, nucleotide binding                                                                                            | innate immune response, response to virus                                                                                                                |
| ribosomal protein L13                                          | Rpl13     | NP_058018    | 24       | 6             | cellular_component, intracellular, ribonucleoprotein complex, ribosome                                                | molecular_function, structural constituent of ribosome                                                                                      | biological_process, translation                                                                                                                          |
| peroxiredoxin 4                                                | Prdx4     | NP_058044    | 31       | 6             | cytoplasm, mitochondrion                                                                                              | antioxidant activity, molecular_function, oxidoreductase activity, peroxidase activity, peroxiredoxin activity                              | biological_process, cell redox homeostasis, oxidation reduction                                                                                          |
| metaxin 2                                                      | Mtx2      | NP_058084    | 30       | 6             | membrane, mitochondrial outer membrane, mitochondrion                                                                 | not classified                                                                                                                              | protein targeting to mitochondrion, protein transport, transport                                                                                         |
| coatamer protein complex, subunit gamma isoform 1              | Copg      | NP_059505    | 98       | 6             | COPI vesicle coat, cytoplasm, cytoplasmic vesicle, Golgi apparatus, Golgi-associated vesicle, membrane, membrane coat | binding, protein binding, structural molecule activity                                                                                      | intracellular protein transport, protein transport, transport, vesicle-mediated transport                                                                |
| cleft lip and palate associated transmembrane protein 1        | Clptm1    | NP_062623    | 75       | 6             | external side of plasma membrane, integral to membrane, membrane                                                      | not classified                                                                                                                              | cell differentiation, multicellular organismal development, regulation of T cell differentiation in the thymus                                           |
| proteolipid protein 2                                          | Plp2      | NP_062729    | 17       | 6             | integral to membrane, membrane                                                                                        | not classified                                                                                                                              | not classified                                                                                                                                           |
| NADH dehydrogenase (ubiquinone) 1 alpha subcomplex, 7 (B14.5a) | Ndufa7    | NP_075691    | 13       | 6             | membrane, mitochondrial inner membrane, mitochondrion, respiratory chain                                              | NADH dehydrogenase (ubiquinone) activity                                                                                                    | ATP synthesis coupled electron transport, electron transport chain, transport                                                                            |
| peroxisomal trans 2-enoyl CoA reductase                        | Pecr      | NP_076012    | 32       | 6             | mitochondrion, peroxisome                                                                                             | binding, catalytic activity, oxidoreductase activity, trans-2-enoyl-CoA reductase (NADPH) activity                                          | fatty acid biosynthetic process, fatty acid elongation, lipid biosynthetic process, metabolic process, oxidation reduction                               |
| hydroxyacyl glutathione hydrolase                              | Hagh      | NP_077246    | 29       | 6             | not classified                                                                                                        | hydrolase activity, hydroxyacylglutathione hydrolase activity, metal ion binding, zinc ion binding                                          | not classified                                                                                                                                           |
| cytochrome b5 type B precursor                                 | Cyb5b     | NP_079834    | 16       | 6             | integral to membrane, membrane, mitochondrial inner membrane, mitochondrial outer membrane, mitochondrion             | heme binding, iron ion binding, metal ion binding                                                                                           | electron transport chain, transport                                                                                                                      |
| NADH dehydrogenase (ubiquinone) 1 beta subcomplex 3            | Ndubf3    | NP_079873    | 12       | 6             | integral to membrane, membrane, mitochondrial inner membrane, mitochondrion, respiratory chain                        | NADH dehydrogenase (ubiquinone) activity                                                                                                    | electron transport chain, transport                                                                                                                      |
| ubiquinol-cytochrome c reductase binding protein               | Uqorb     | NP_080495    | 14       | 6             | membrane, mitochondrial inner membrane, mitochondrion, respiratory chain                                              | ubiquinol-cytochrome-c reductase activity                                                                                                   | electron transport chain, mitochondrial electron transport, ubiquinol to cytochrome c, transport                                                         |

| Protein Name                                           | Gene Name | Accession No | Mw (kDa) | Peptide Count | GO Component                                                                                                                            | GO Function                                                                                                                                                                        | GO Process                                                                                                                                   |
|--------------------------------------------------------|-----------|--------------|----------|---------------|-----------------------------------------------------------------------------------------------------------------------------------------|------------------------------------------------------------------------------------------------------------------------------------------------------------------------------------|----------------------------------------------------------------------------------------------------------------------------------------------|
| lectin, mannose-binding, 1                             | Lman1     | NP_081676    | 58       | 6             | endoplasmic reticulum, ER-Golgi intermediate compartment, Golgi apparatus, integral to membrane, membrane, sarcomere                    | sugar binding                                                                                                                                                                      | ER to Golgi vesicle-mediated transport, protein transport, transport, vesicle-mediated transport                                             |
| diaphorase 1                                           | Cyb5r3    | NP_084063    | 34       | 6             | cytoplasm, endoplasmic reticulum, membrane, mitochondrial inner membrane, mitochondrial outer membrane, mitochondrion, soluble fraction | cytochrome-b5 reductase activity, electron carrier activity, oxidoreductase activity                                                                                               | cholesterol biosynthetic process, lipid biosynthetic process, oxidation reduction, steroid biosynthetic process, sterol biosynthetic process |
| eukaryotic translation initiation factor 3, subunit 9  | Eif3b     | NP_598677    | 91       | 6             | cytoplasm                                                                                                                               | nucleic acid binding, nucleotide binding, RNA binding                                                                                                                              | translation                                                                                                                                  |
| aldehyde dehydrogenase family 7, member A1             | Aldh7a1   | NP_613066    | 56       | 6             | mitochondrion                                                                                                                           | L-amino acid semialdehyde dehydrogenase activity, oxidoreductase activity                                                                                                          | metabolic process, oxidation reduction                                                                                                       |
| eukaryotic translation initiation factor 4A1           | Eif4a1    | NP_659207    | 46       | 6             | not classified                                                                                                                          | ATP binding, ATP-dependent helicase activity, helicase activity, hydrolase activity, nucleic acid binding, nucleotide binding, RNA binding, translation initiation factor activity | translation                                                                                                                                  |
| pitrilysin metalloproteinase 1                         | Pitrm1    | NP_660113    | 117      | 6             | mitochondrion                                                                                                                           | catalytic activity, hydrolase activity, metal ion binding, metalloendopeptidase activity, metalloproteinase activity, peptidase activity, zinc ion binding                         | proteolysis                                                                                                                                  |
| carbonic reductase 4                                   | Cbr4      | NP_663570    | 25       | 6             | cytoplasm                                                                                                                               | binding, catalytic activity, oxidoreductase activity                                                                                                                               | metabolic process, oxidation reduction                                                                                                       |
| phosphatidylinositol-binding clathrin assembly protein | Picalm    | NP_666306    | 72       | 6             | clathrin coat, coated pit, cytoplasmic vesicle, Golgi apparatus, membrane                                                               | clathrin binding, phosphatidylinositol binding, phospholipid binding                                                                                                               | clathrin coat assembly, endocytosis, hemopoiesis, multicellular organismal development, receptor-mediated endocytosis                        |
| solute carrier family 43, member 2                     | Slc43a2   | NP_775564    | 62       | 6             | integral to membrane, membrane, plasma membrane                                                                                         | L-amino acid transmembrane transporter activity                                                                                                                                    | L-amino acid transport                                                                                                                       |
| pyruvate dehydrogenase complex, component X            | Pdhx      | NP_780303    | 54       | 6             | mitochondrion                                                                                                                           | acyltransferase activity, lipoic acid binding, protein binding, transferase activity                                                                                               | metabolic process                                                                                                                            |
| aspartyl-tRNA synthetase                               | Dars      | NP_803228    | 57       | 6             | cytoplasm                                                                                                                               | aminoacyl-tRNA ligase activity, aspartate-tRNA ligase activity, ATP binding, ligase activity, nucleic acid binding, nucleotide binding                                             | aspartyl-tRNA aminoacylation, translation, tRNA aminoacylation for protein translation                                                       |
| ROD1 regulator of differentiation 1 isoform 2          | Rod1      | NP_835458    | 57       | 6             | nucleus                                                                                                                                 | nucleic acid binding, nucleotide binding, RNA binding                                                                                                                              | mRNA processing                                                                                                                              |
| NADH dehydrogenase subunit 5                           | ND5       | NP_904338    | 68       | 6             | integral to membrane, membrane, mitochondrial inner membrane, mitochondrion, respiratory chain                                          | NADH dehydrogenase (ubiquinone) activity, NADH dehydrogenase activity, oxidoreductase activity                                                                                     | electron transport chain, oxidation reduction, transport                                                                                     |
| acyl-CoA synthetase short-chain family member 3        | Acss3     | NP_941038    | 54       | 6             | mitochondrion                                                                                                                           | acetate-CoA ligase activity, ATP binding, catalytic activity, ligase activity, nucleotide binding                                                                                  | metabolic process                                                                                                                            |

| Protein Name                                                   | Gene Name    | Accession No | Mw (kDa) | Peptide Count | GO Component                                                                                                   | GO Function                                                                                                                                                                                                                | GO Process                                                                                                                                      |
|----------------------------------------------------------------|--------------|--------------|----------|---------------|----------------------------------------------------------------------------------------------------------------|----------------------------------------------------------------------------------------------------------------------------------------------------------------------------------------------------------------------------|-------------------------------------------------------------------------------------------------------------------------------------------------|
| pantophysin isoform 2                                          | Sypl         | NP_942003    | 27       | 6             | cytoplasmic vesicle, integral to membrane, membrane, secretory granule, synaptic vesicle                       | transporter activity                                                                                                                                                                                                       | transport                                                                                                                                       |
| branched chain ketoacid dehydrogenase E1, beta polypeptide     | Bckdcb       | NP_954665    | 36       | 6             | mitochondrial inner membrane, mitochondrion                                                                    | 3-methyl-2-oxobutanoate dehydrogenase (2-methylpropanoyl-transferring) activity, alpha-ketoacid dehydrogenase activity, catalytic activity, oxidoreductase activity                                                        | cellular amino acid catabolic process, metabolic process, oxidation reduction                                                                   |
| PREDICTED: cingulin                                            | Cgn          | XP_001001375 | 150      | 6             | apical junction complex, cell junction, myosin complex, tight junction                                         | molecular_function, motor activity                                                                                                                                                                                         | biological_process                                                                                                                              |
| PREDICTED: similar to hCG1640785                               | LOC100045659 | XP_001474736 | 12       | 6             | not classified                                                                                                 | not classified                                                                                                                                                                                                             | not classified                                                                                                                                  |
| proteasome activator subunit 2 isoform 2                       | Psme2        | NP_001025026 | 26       | 5             | proteasome activator complex, proteasome complex                                                               | proteasome activator activity, protein binding                                                                                                                                                                             | antigen processing and presentation of exogenous antigen                                                                                        |
| potassium inwardly-rectifying channel J10                      | Kcnj10       | NP_001034573 | 42       | 5             | integral to membrane, integral to plasma membrane, membrane                                                    | ATP binding, inward rectifier potassium channel activity, ion channel activity, nucleotide binding, potassium channel activity, motor activity, potassium ion binding, protein binding, voltage-gated ion channel activity | ion transport, potassium ion transport, transport                                                                                               |
| dynamin 2                                                      | Dnm2         | NP_001034609 | 98       | 5             | cell junction, cytoplasm, cytoskeleton, membrane, microtubule, plasma membrane, postsynaptic membrane, synapse | GTP binding, GTPase activity, hydrolase activity, motor activity, nucleotide binding, protein binding                                                                                                                      | endocytosis                                                                                                                                     |
| carbonic anhydrase 1                                           | Car1         | NP_001077426 | 28       | 5             | cytoplasm                                                                                                      | carbonate dehydratase activity, lyase activity, metal ion binding, zinc ion binding                                                                                                                                        | one-carbon metabolic process                                                                                                                    |
| sorting nexin 12 isoform 2                                     | Snx12        | NP_001103781 | 20       | 5             | not classified                                                                                                 | phosphoinositide binding, protein binding                                                                                                                                                                                  | cell communication, protein transport, transport                                                                                                |
| annexin A7                                                     | Anxa7        | NP_001104264 | 50       | 5             | cytosol, insoluble fraction, nuclear envelope, nucleus, plasma membrane, soluble fraction, vesicle             | calcium ion binding, calcium-dependent phospholipid binding, protein binding                                                                                                                                               | cell proliferation, cellular calcium ion homeostasis, cellular water homeostasis, hemostasis, regulation of cell shape, response to salt stress |
| nascent polypeptide-associated complex alpha subunit isoform a | Naca         | NP_001106670 | 220      | 5             | cytoplasm, nucleus                                                                                             | DNA binding, TATA-binding protein binding, transcription coactivator activity                                                                                                                                              | protein transport, regulation of transcription, transcription, transport                                                                        |
| ADP-ribosylation factor 6                                      | Arf6         | NP_031507    | 20       | 5             | cytoplasm, endosome, Golgi apparatus, intracellular, plasma membrane                                           | GTP binding, nucleotide binding, protein binding                                                                                                                                                                           | apoptosis, liver development, protein transport, small GTPase mediated signal transduction, transport, vesicle-mediated transport               |
| carbonyl reductase 1                                           | Cbr1         | NP_031646    | 31       | 5             | cellular_component, cytoplasm                                                                                  | binding, carbonyl reductase (NADPH) activity, catalytic activity, oxidoreductase activity                                                                                                                                  | biological_process, metabolic process, oxidation reduction                                                                                      |

| Protein Name                                                                   | Gene Name | Accession No | Mw (kDa) | Peptide Count | GO Component                                                                                              | GO Function                                                                                                                                                                                                                                                                                                                                                                           | GO Process                                                                                                                                                                                                                                                                                           |
|--------------------------------------------------------------------------------|-----------|--------------|----------|---------------|-----------------------------------------------------------------------------------------------------------|---------------------------------------------------------------------------------------------------------------------------------------------------------------------------------------------------------------------------------------------------------------------------------------------------------------------------------------------------------------------------------------|------------------------------------------------------------------------------------------------------------------------------------------------------------------------------------------------------------------------------------------------------------------------------------------------------|
| protein phosphatase 1G (formerly 2C), magnesium-dependent, gamma isoform       | Ppm1g     | NP_032040    | 59       | 5             | nucleus, protein serine/threonine phosphatase complex                                                     | catalytic activity, hydrolase activity, magnesium ion binding, manganese ion binding, metal ion binding, phosphoprotein phosphatase activity, protein serine/threonine phosphatase activity                                                                                                                                                                                           | cell cycle, cell cycle arrest, protein amino acid dephosphorylation                                                                                                                                                                                                                                  |
| interferon activated gene 204                                                  | Ifi204    | NP_032355    | 69       | 5             | cytoplasm, nucleolus, nucleoplasm, nucleus                                                                | protein binding, transcription cofactor activity                                                                                                                                                                                                                                                                                                                                      | DNA damage response, signal transduction by p53 class mediator resulting in induction of apoptosis, multicellular organismal development, positive regulation of osteoblast differentiation, regulation of transcription, regulation of transcription from RNA polymerase II promoter, transcription |
| integrin alpha V                                                               | Itgav     | NP_032428    | 115      | 5             | external side of plasma membrane, integral to membrane, integrin complex, membrane, plasma membrane       | calcium ion binding, protein binding, receptor activity                                                                                                                                                                                                                                                                                                                               | angiogenesis, apoptotic cell clearance, blood vessel development, cell adhesion, cell differentiation, integrin-mediated signaling pathway, multicellular organismal development                                                                                                                     |
| 4-nitrophenylphosphatase domain and non-neuronal SNAP25-like protein homolog 1 | Nipsnap1  | NP_032724    | 33       | 5             | mitochondrial inner membrane, mitochondrion                                                               | molecular_function                                                                                                                                                                                                                                                                                                                                                                    | biological_process                                                                                                                                                                                                                                                                                   |
| phosphatidylinositol transfer protein, alpha                                   | Pitpna    | NP_032876    | 32       | 5             | cytoplasm, integral to membrane, intracellular                                                            | lipid binding, phospholipid binding                                                                                                                                                                                                                                                                                                                                                   | transport                                                                                                                                                                                                                                                                                            |
| protease (prosome, macropain) 26S subunit, ATPase 1                            | Psmc1     | NP_032973    | 49       | 5             | cytoplasm, nucleus, proteasome complex                                                                    | ATP binding, hydrolase activity, nucleoside-triphosphatase activity, nucleotide binding                                                                                                                                                                                                                                                                                               | protein catabolic process                                                                                                                                                                                                                                                                            |
| scinderin                                                                      | Scin      | NP_033158    | 69       | 5             | cytoplasm, cytoskeleton                                                                                   | actin binding, calcium ion binding                                                                                                                                                                                                                                                                                                                                                    | actin filament capping                                                                                                                                                                                                                                                                               |
| acidic (leucine-rich) nuclear phosphoprotein 32 family, member A               | Anp32a    | NP_033802    | 29       | 5             | cytoplasm, nuclear matrix, nucleus                                                                        | protein binding                                                                                                                                                                                                                                                                                                                                                                       | regulation of transcription, transcription                                                                                                                                                                                                                                                           |
| calcium/calmodulin-dependent serine protein kinase                             | Cask      | NP_033936    | 102      | 5             | basolateral plasma membrane, cytoplasm, cytosol, membrane, nucleus, plasma membrane, synapse, synaptosome | ATP binding, calmodulin binding, kinase activity, nucleotide binding, protein binding, protein kinase activity, protein serine/threonine kinase activity, transferase activity                                                                                                                                                                                                        | positive regulation of transcription from RNA polymerase II promoter, protein amino acid phosphorylation                                                                                                                                                                                             |
| phosphoribosylglycinamide formyltransferase                                    | Gart      | NP_034386    | 108      | 5             | cytoplasm                                                                                                 | ATP binding, catalytic activity, hydroxymethyl-, formyl- and related transferase activity, ligase activity, manganese ion binding, metal ion binding, methyltransferase activity, nucleotide binding, phosphoribosylamine-glycine ligase activity, phosphoribosylformylglycnamidine cyclo-ligase activity, phosphoribosylglycinamide formyltransferase activity, transferase activity | biosynthetic process, 'de novo' IMP biosynthetic process, purine base biosynthetic process, purine nucleotide biosynthetic process                                                                                                                                                                   |

| Protein Name                                                 | Gene Name | Accession No | Mw (kDa) | Peptide Count | GO Component                                                                                | GO Function                                                                                                                                                                                            | GO Process                                                                                                                                                 |
|--------------------------------------------------------------|-----------|--------------|----------|---------------|---------------------------------------------------------------------------------------------|--------------------------------------------------------------------------------------------------------------------------------------------------------------------------------------------------------|------------------------------------------------------------------------------------------------------------------------------------------------------------|
| glutathione reductase 1 precursor                            | Gsr       | NP_034474    | 54       | 5             | cytoplasm, external side of plasma membrane, mitochondrion                                  | FAD binding, glutathione-disulfide reductase activity, NADP or NADPH binding, oxidoreductase activity                                                                                                  | cell redox homeostasis, glutathione metabolic process, oxidation reduction                                                                                 |
| ribosomal protein L10A                                       | Rpl10a    | NP_035417    | 25       | 5             | cellular_component, intracellular, ribonucleoprotein complex, ribosome                      | molecular_function, RNA binding, structural constituent of ribosome                                                                                                                                    | biological_process, RNA processing, translation                                                                                                            |
| valyl-tRNA synthetase                                        | Vars      | NP_035820    | 140      | 5             | cytoplasm, mitochondrion                                                                    | aminoacyl-tRNA ligase activity, ATP binding, ligase activity, nucleotide binding, valine-tRNA ligase activity                                                                                          | translation, tRNA aminoacylation for protein translation, valyl-tRNA aminoacylation                                                                        |
| ribosomal protein S3                                         | Rps3      | NP_036182    | 27       | 5             | cytoplasm, intracellular, ribonucleoprotein complex, ribosome, small ribosomal subunit      | RNA binding, structural constituent of ribosome                                                                                                                                                        | translation                                                                                                                                                |
| ribosomal protein L8                                         | Rpl8      | NP_036183    | 28       | 5             | cellular_component, cytoplasm, intracellular, ribonucleoprotein complex, ribosome           | molecular_function, RNA binding, rRNA binding, structural constituent of ribosome                                                                                                                      | biological_process, translation                                                                                                                            |
| drebrin-like                                                 | Dbnl      | NP_038838    | 48       | 5             | cell cortex, cell projection, cytoplasm, cytoskeleton, intracellular, lamellipodium, ruffle | actin binding, actin filament binding, protein binding                                                                                                                                                 | actin filament bundle formation, actin filament severing, barbed-end actin filament capping, endocytosis, immune response, Rac protein signal transduction |
| aminoadipate-semialdehyde synthase precursor                 | Aass      | NP_038958    | 103      | 5             | mitochondrion                                                                               | catalytic activity, electron carrier activity, oxidoreductase activity, saccharopine dehydrogenase (NAD+, L-glutamate-forming) activity, saccharopine dehydrogenase (NADP+, L-lysine-forming) activity | generation of precursor metabolites and energy, L-lysine catabolic process, oxidation reduction                                                            |
| damage specific DNA binding protein 1                        | Ddb1      | NP_056550    | 127      | 5             | cytoplasm, nucleus                                                                          | DNA binding, nucleic acid binding                                                                                                                                                                      | DNA repair, modification-dependent protein catabolic process, response to DNA damage stimulus                                                              |
| ATP-binding cassette, subfamily E, member 1                  | Abce1     | NP_056566    | 67       | 5             | cytoplasm, mitochondrion                                                                    | ATP binding, ATPase activity, electron carrier activity, iron-sulfur cluster binding, nucleoside-triphosphatase activity, nucleotide binding                                                           | not classified                                                                                                                                             |
| alpha isoform of regulatory subunit A, protein phosphatase 2 | Ppp2r1a   | NP_058587    | 65       | 5             | cytosol, protein phosphatase type 2A complex                                                | binding, protein binding                                                                                                                                                                               | not classified                                                                                                                                             |
| ribosomal protein S3a                                        | Rps3a     | NP_058655    | 30       | 5             | cytosol, intracellular, nucleus, ribonucleoprotein complex, ribosome                        | protein binding, structural constituent of ribosome                                                                                                                                                    | translation                                                                                                                                                |
| ribosomal protein, large, P1                                 | Rplp1     | NP_061341    | 11       | 5             | cellular_component, intracellular, ribonucleoprotein complex, ribosome                      | molecular_function, structural constituent of ribosome                                                                                                                                                 | biological_process, translational elongation                                                                                                               |
| soc-2 (suppressor of clear) homolog                          | Shoc2     | NP_062632    | 65       | 5             | not classified                                                                              | protein binding                                                                                                                                                                                        | not classified                                                                                                                                             |
| heterogeneous nuclear ribonucleoprotein H2                   | Hnrnp2    | NP_063921    | 49       | 5             | nucleus, ribonucleoprotein complex                                                          | molecular_function, nucleic acid binding, nucleotide binding, RNA binding                                                                                                                              | biological_process                                                                                                                                         |
| acid sphingomyelinase-like phosphodiesterase 3a              | Smpdl3a   | NP_065586    | 50       | 5             | extracellular region, extracellular space                                                   | hydrolase activity, hydrolase activity, acting on glycosyl bonds, sphingomyelin phosphodiesterase activity                                                                                             | metabolic process, sphingomyelin catabolic process                                                                                                         |

| Protein Name                                               | Gene Name | Accession No | Mw (kDa) | Peptide Count | GO Component                                                                | GO Function                                                                                                                                                                                                  | GO Process                                                                                                                                                                                                              |
|------------------------------------------------------------|-----------|--------------|----------|---------------|-----------------------------------------------------------------------------|--------------------------------------------------------------------------------------------------------------------------------------------------------------------------------------------------------------|-------------------------------------------------------------------------------------------------------------------------------------------------------------------------------------------------------------------------|
| adenylate kinase 1                                         | Ak1       | NP_067490    | 23       | 5             | cytoplasm, mitochondrion, plasma membrane                                   | adenylate kinase activity, ATP binding, kinase activity, nucleobase, nucleoside, nucleotide kinase activity, nucleotide binding, transferase activity                                                        | ATP metabolic process, cell cycle arrest, nucleobase, nucleoside, nucleotide and nucleic acid metabolic process                                                                                                         |
| eukaryotic translation elongation factor 1 delta isoform b | Eef1d     | NP_075729    | 31       | 5             | eukaryotic translation elongation factor 1 complex                          | translation elongation factor activity                                                                                                                                                                       | translation, translational elongation                                                                                                                                                                                   |
| ribosomal protein L35                                      | Rpl35     | NP_079868    | 15       | 5             | cellular_component, intracellular, ribonucleoprotein complex, ribosome      | molecular_function, structural constituent of ribosome                                                                                                                                                       | biological_process, translation                                                                                                                                                                                         |
| ribosomal protein L11                                      | Rpl11     | NP_080195    | 20       | 5             | cellular_component, intracellular, ribonucleoprotein complex, ribosome      | protein binding, RNA binding, rRNA binding, structural constituent of ribosome                                                                                                                               | biological_process, translation                                                                                                                                                                                         |
| eukaryotic translation elongation factor 1 gamma           | Eef1g     | NP_080283    | 50       | 5             | eukaryotic translation elongation factor 1 complex                          | translation elongation factor activity                                                                                                                                                                       | translation, translational elongation                                                                                                                                                                                   |
| endoplasmic reticulum protein ERp29 precursor              | Erp29     | NP_080405    | 29       | 5             | endoplasmic reticulum, endoplasmic reticulum lumen                          | not classified                                                                                                                                                                                               | protein secretion                                                                                                                                                                                                       |
| enoyl Coenzyme A hydratase domain containing 2             | Echdc2    | NP_081004    | 26       | 5             | mitochondrion                                                               | catalytic activity, lyase activity                                                                                                                                                                           | fatty acid metabolic process, lipid metabolic process, metabolic process                                                                                                                                                |
| dehydrogenase/reductase (SDR family) member 1              | Dhrs1     | NP_081095    | 34       | 5             | mitochondrial inner membrane                                                | binding, catalytic activity, oxidoreductase activity                                                                                                                                                         | metabolic process, oxidation reduction                                                                                                                                                                                  |
| histidine triad protein member 5                           | Dcps      | NP_081306    | 39       | 5             | cytoplasm, nucleus                                                          | hydrolase activity, protein binding                                                                                                                                                                          | deadenylation-dependent decapping of nuclear-transcribed mRNA, nuclear-transcribed mRNA catabolic process, nonsense-mediated decay                                                                                      |
| AFG3(ATPase family gene 3)-like 2                          | Afg3l2    | NP_081406    | 90       | 5             | integral to membrane, membrane, mitochondrial inner membrane, mitochondrion | ATP binding, hydrolase activity, metal ion binding, metalloendopeptidase activity, metallopeptidase activity, nucleoside-triphosphatase activity, nucleotide binding, peptidase activity, zinc ion binding   | axonogenesis, death, muscle fiber development, myelination, nerve development, neuromuscular junction development, protein catabolic process, proteolysis, regulation of multicellular organism growth, righting reflex |
| asparaginyl-tRNA synthetase                                | Nars      | NP_081626    | 63       | 5             | cytoplasm                                                                   | aminoacyl-tRNA ligase activity, asparagine-tRNA ligase activity, aspartate-tRNA ligase activity, ATP binding, ligase activity, nucleic acid binding, nucleotide binding                                      | asparaginyl-tRNA aminoacylation, aspartyl-tRNA aminoacylation, translation, tRNA aminoacylation for protein translation                                                                                                 |
| proteasome 26S non-ATPase subunit 1                        | Psmd1     | NP_081633    | 106      | 5             | proteasome complex                                                          | binding, enzyme regulator activity                                                                                                                                                                           | regulation of protein catabolic process                                                                                                                                                                                 |
| katanin p60 subunit A-like 2                               | Katnal2   | NP_081997    | 46       | 5             | microtubule                                                                 | ATP binding, hydrolase activity, microtubule-severing ATPase activity, nucleotide binding                                                                                                                    | not classified                                                                                                                                                                                                          |
| Coenzyme A synthase                                        | Coasy     | NP_082172    | 62       | 5             | not classified                                                              | ATP binding, catalytic activity, dephospho-CoA kinase activity, kinase activity, nucleotide binding, nucleotidyltransferase activity, pantetheine-phosphate adenyltransferase activity, transferase activity | biosynthetic process, coenzyme A biosynthetic process                                                                                                                                                                   |

| Protein Name                                                      | Gene Name      | Accession No | Mw (kDa) | Peptide Count | GO Component                                                                                                               | GO Function                                                                                                                                                         | GO Process                                                                                                                   |
|-------------------------------------------------------------------|----------------|--------------|----------|---------------|----------------------------------------------------------------------------------------------------------------------------|---------------------------------------------------------------------------------------------------------------------------------------------------------------------|------------------------------------------------------------------------------------------------------------------------------|
| serine hydroxymethyltransferase 2 (mitochondrial)                 | Shmt2          | NP_082506    | 56       | 5             | mitochondrial inner membrane, mitochondrion                                                                                | glycine hydroxymethyltransferase activity, methyltransferase activity, transferase activity                                                                         | one-carbon metabolic process                                                                                                 |
| thioredoxin domain containing 4                                   | Txndc4         | NP_083848    | 47       | 5             | endoplasmic reticulum, endoplasmic reticulum lumen                                                                         | not classified                                                                                                                                                      | cell redox homeostasis, response to unfolded protein                                                                         |
| carbonic anhydrase 15                                             | Car15          | NP_085035    | 35       | 5             | extracellular region                                                                                                       | carbonate dehydratase activity, lyase activity, metal ion binding, zinc ion binding                                                                                 | one-carbon metabolic process                                                                                                 |
| chloride intracellular channel 1                                  | Clic1          | NP_254279    | 27       | 5             | chloride channel complex, cytoplasm, integral to membrane, membrane, nuclear envelope, nucleus, plasma membrane            | chloride channel activity, chloride ion binding, ion channel activity, protein binding, voltage-gated chloride channel activity, voltage-gated ion channel activity | chloride transport, ion transport, transport                                                                                 |
| Barter syndrome, infantile, with sensorineural deafness (Barttin) | Bsnd           | NP_536706    | 34       | 5             | basolateral plasma membrane, integral to membrane, integral to plasma membrane, membrane, plasma membrane, protein complex | chloride channel activity, protein binding                                                                                                                          | cellular chloride ion homeostasis, cellular ion homeostasis, cellular potassium ion homeostasis, sensory perception of sound |
| U2 small nuclear ribonucleoprotein auxiliary factor (U2AF) 2      | U2af2          | NP_598432    | 53       | 5             | nucleus, ribonucleoprotein complex                                                                                         | nucleic acid binding, nucleotide binding, RNA binding                                                                                                               | mRNA processing, RNA splicing                                                                                                |
| hypothetical protein LOC70984                                     | 4931406C07 Rik | NP_598493    | 35       | 5             | nucleus                                                                                                                    | hydrolase activity, hydrolase activity, acting on ester bonds, metal ion binding, zinc ion binding                                                                  | not classified                                                                                                               |
| ribonuclease/angiogenin inhibitor 1                               | Rnh1           | NP_660117    | 50       | 5             | cytoplasm                                                                                                                  | protein binding                                                                                                                                                     | not classified                                                                                                               |
| hexokinase domain containing 1                                    | Hkdc1          | NP_663394    | 102      | 5             | not classified                                                                                                             | ATP binding, hexokinase activity, kinase activity, nucleotide binding, phosphotransferase activity, alcohol group as acceptor, transferase activity                 | carbohydrate metabolic process, glycolysis                                                                                   |
| tetraspanin 8                                                     | Tspan8         | NP_666122    | 26       | 5             | integral to membrane, membrane                                                                                             | not classified                                                                                                                                                      | not classified                                                                                                               |
| splicing factor, arginine/serine-rich 7                           | Sfrs7          | NP_666195    | 27       | 5             | nucleus                                                                                                                    | metal ion binding, nucleic acid binding, nucleotide binding, protein binding, RNA binding, zinc ion binding                                                         | mRNA processing, RNA splicing                                                                                                |
| sorbitol dehydrogenase                                            | Sord           | NP_666238    | 38       | 5             | soluble fraction                                                                                                           | L-iditol 2-dehydrogenase activity, metal ion binding, oxidoreductase activity, zinc ion binding                                                                     | oxidation reduction, sorbitol metabolic process                                                                              |
| inorganic pyrophosphatase 2                                       | Ppa2           | NP_666253    | 38       | 5             | cytoplasm, mitochondrion                                                                                                   | hydrolase activity, inorganic diphosphatase activity, magnesium ion binding, metal ion binding                                                                      | phosphate metabolic process                                                                                                  |
| monoamine oxidase A                                               | Maoa           | NP_776101    | 60       | 5             | integral to membrane, membrane, mitochondrial outer membrane, mitochondrion                                                | amine oxidase activity, electron carrier activity, oxidoreductase activity                                                                                          | catecholamine metabolic process, dopamine catabolic process, neurotransmitter catabolic process, oxidation reduction         |
| Fe-containing alcohol dehydrogenase 1                             | Adhfe1         | NP_780445    | 50       | 5             | cellular_component, mitochondrion                                                                                          | hydroxyacid-oxoacid transhydrogenase activity, metal ion binding, oxidoreductase activity                                                                           | oxidation reduction                                                                                                          |

| Protein Name                                                                              | Gene Name      | Accession No | Mw (kDa) | Peptide Count | GO Component                                                                                                         | GO Function                                                                                                                                                   | GO Process                                                                                                                                                                                                                                                   |
|-------------------------------------------------------------------------------------------|----------------|--------------|----------|---------------|----------------------------------------------------------------------------------------------------------------------|---------------------------------------------------------------------------------------------------------------------------------------------------------------|--------------------------------------------------------------------------------------------------------------------------------------------------------------------------------------------------------------------------------------------------------------|
| cytoskeleton-associated protein 4                                                         | Ckap4          | NP_780660    | 64       | 5             | cell surface, endoplasmic reticulum, integral to membrane, membrane                                                  | protein binding                                                                                                                                               | biological_process                                                                                                                                                                                                                                           |
| ATPase, H <sup>+</sup> transporting, lysosomal V1 subunit G3                              | Atp6v1g3       | NP_796371    | 14       | 5             | cytosol, membrane, plasma membrane, vacuolar proton-transporting V-type ATPase complex                               | hydrogen-exporting ATPase activity, phosphorylative mechanism, hydrolase activity, acting on acid anhydrides, catalyzing transmembrane movement of substances | ATP hydrolysis coupled proton transport, ion transport, proton transport, transport                                                                                                                                                                          |
| NADH dehydrogenase subunit 4                                                              | ND4            | NP_904337    | 52       | 5             | integral to membrane, membrane, mitochondrion, respiratory chain                                                     | NADH dehydrogenase (ubiquinone) activity, oxidoreductase activity                                                                                             | electron transport chain, oxidation reduction, transport                                                                                                                                                                                                     |
| UDP-glucose ceramide glucosyltransferase-like 1                                           | Ugcgl1         | NP_942602    | 176      | 5             | endoplasmic reticulum                                                                                                | transferase activity, transferase activity, transferring glycosyl groups, UDP-glucose:glycoprotein glucosyltransferase activity                               | protein amino acid glycosylation                                                                                                                                                                                                                             |
| PREDICTED: similar to Isochorismatase domain-containing protein 2A, mitochondrial         | Isoc2a         | XP_001475311 | 22       | 5             | not classified                                                                                                       | not classified                                                                                                                                                | not classified                                                                                                                                                                                                                                               |
| PREDICTED: similar to novel C2, Fer1 (NUC094) and FerB (NUC096) domain containing protein | Fer1l4         | XP_001481330 | 194      | 5             | integral to membrane, membrane                                                                                       | not classified                                                                                                                                                | not classified                                                                                                                                                                                                                                               |
| translocase of inner mitochondrial membrane 10 homolog                                    | Timm9          | NP_001020024 | 10       | 4             | membrane, mitochondrial inner membrane, mitochondrial intermembrane space protein transporter complex, mitochondrion | metal ion binding, protein binding, zinc ion binding                                                                                                          | protein import into mitochondrial inner membrane, protein targeting to mitochondrion, protein transport, transmembrane transport, transport                                                                                                                  |
| cytochrome b5 domain containing 2                                                         | Cyb5d2         | NP_001020097 | 12       | 4             | integral to membrane, membrane                                                                                       | heme binding                                                                                                                                                  | not classified                                                                                                                                                                                                                                               |
| calcium activated chloride channel                                                        | AI747448       | NP_001028371 | 102      | 4             | not classified                                                                                                       | not classified                                                                                                                                                | not classified                                                                                                                                                                                                                                               |
| hypothetical protein LOC218236                                                            | BC010304       | NP_001028440 | 122      | 4             | cytoplasm, membrane, plasma membrane                                                                                 | RNA binding                                                                                                                                                   | not classified                                                                                                                                                                                                                                               |
| heterogeneous nuclear ribonucleoprotein D isoform b                                       | Hnmpd          | NP_001070734 | 36       | 4             | chromosome, nucleus, ribonucleoprotein complex                                                                       | DNA binding, nucleic acid binding, nucleotide binding, protein binding, RNA binding                                                                           | regulation of mRNA stability, regulation of transcription, transcription                                                                                                                                                                                     |
| hypothetical protein LOC74148                                                             | 1300001101 Rik | NP_001074627 | 152      | 4             | not classified                                                                                                       | binding                                                                                                                                                       | not classified                                                                                                                                                                                                                                               |
| NADH-ubiquinone oxidoreductase flavoprotein 3 isoform 2                                   | 1500032D16 Rik | NP_001077360 | 12       | 4             | membrane, mitochondrial inner membrane, mitochondrion, respiratory chain                                             | molecular_function                                                                                                                                            | electron transport chain, transport                                                                                                                                                                                                                          |
| catenin, delta 1 isoform 2                                                                | Ctnnd1         | NP_001078917 | 103      | 4             | cytoplasm, lamellipodium membrane, membrane fraction, nucleus, plasma membrane                                       | protein binding, protein phosphatase binding, RPTP-like protein binding                                                                                       | cell adhesion, cell-cell adhesion, epithelial cell differentiation involved in salivary gland development, morphogenesis of a polarized epithelium, regulation of transcription, salivary gland morphogenesis, transcription, Wnt receptor signaling pathway |
| CD151 antigen                                                                             | Cd151          | NP_001104520 | 28       | 4             | integral to membrane, membrane                                                                                       | not classified                                                                                                                                                | not classified                                                                                                                                                                                                                                               |
| hypothetical protein LOC666274                                                            | EG666274       | NP_001104748 | 19       | 4             | not classified                                                                                                       | not classified                                                                                                                                                | not classified                                                                                                                                                                                                                                               |
| macrophage migration inhibitory factor-like                                               | LOC100040259   | NP_001104800 | 12       | 4             | not classified                                                                                                       | not classified                                                                                                                                                | not classified                                                                                                                                                                                                                                               |
| erythrocyte protein band 4.1-like 5 isoform 2                                             | Epb4.1l5       | NP_001106887 | 58       | 4             | cell junction, cytoplasm, cytoskeleton, extrinsic to membrane                                                        | binding, cytoskeletal protein binding                                                                                                                         | axial mesoderm development, paraxial mesoderm development                                                                                                                                                                                                    |



| Protein Name                                         | Gene Name | Accession No | Mw (kDa) | Peptide Count | GO Component                                                                                                                                                                                                                                                                                                                                                                 | GO Function                                                                                                                                                                                                                                                                                                                                                                                                                                                                                                                                                                                                                                                                                                       | GO Process                                                                                                                                                                                                                                                                                                                                                                                                                                                                                                                                                                                                                                                                                                                                                                                                                                                      |
|------------------------------------------------------|-----------|--------------|----------|---------------|------------------------------------------------------------------------------------------------------------------------------------------------------------------------------------------------------------------------------------------------------------------------------------------------------------------------------------------------------------------------------|-------------------------------------------------------------------------------------------------------------------------------------------------------------------------------------------------------------------------------------------------------------------------------------------------------------------------------------------------------------------------------------------------------------------------------------------------------------------------------------------------------------------------------------------------------------------------------------------------------------------------------------------------------------------------------------------------------------------|-----------------------------------------------------------------------------------------------------------------------------------------------------------------------------------------------------------------------------------------------------------------------------------------------------------------------------------------------------------------------------------------------------------------------------------------------------------------------------------------------------------------------------------------------------------------------------------------------------------------------------------------------------------------------------------------------------------------------------------------------------------------------------------------------------------------------------------------------------------------|
| catenin (cadherin associated protein), beta 1, 88kDa | Ctnnb1    | NP_031640    | 85       | 4             | adherens junction, apical junction complex, apical part of cell, basolateral plasma membrane, cell projection membrane, cell cell adherens junction, cell-cell junction, cytoplasm, cytoskeleton, fascia adherens, lamellipodium, lateral plasma membrane, membrane, membrane fraction, microvillus membrane, nucleus, plasma membrane, transcription factor complex, Z disc | alpha-catenin binding, binding, cadherin binding, chromatin binding, DNA binding, double-stranded DNA binding, protein binding, protein phosphatase binding, transcription activator activity, transcription coactivator activity, transcription factor activity, transcription factor binding                                                                                                                                                                                                                                                                                                                                                                                                                    | anterior/posterior axis specification, apoptosis, bone resorption, camera-type eye morphogenesis, cell adhesion, cell differentiation, cell fate determination, cell fate specification, cell maturation, cell morphogenesis involved in differentiation, cell proliferation, cell-cell adhesion, cell-matrix adhesion, cellular process, cellular protein localization, dorsal/ventral axis specification, dorsal/ventral pattern formation, ectoderm development, embryonic arm morphogenesis, embryonic digit morphogenesis, embryonic hindlimb morphogenesis, endoderm formation, endodermal cell fate commitment, epithelial cell differentiation involved in prostate gland development, forebrain development, gastrulation with mouth forming second, glial cell fate determination, heart development, hemopoiesis, lung development, morphogenesis of |
| cathepsin B preproprotein                            | Ctsb      | NP_031824    | 37       | 4             | lysosome, mitochondrion                                                                                                                                                                                                                                                                                                                                                      | cysteine-type endopeptidase activity, cysteine-type peptidase activity, hydrolase activity, peptidase activity                                                                                                                                                                                                                                                                                                                                                                                                                                                                                                                                                                                                    | proteolysis, regulation of catalytic activity                                                                                                                                                                                                                                                                                                                                                                                                                                                                                                                                                                                                                                                                                                                                                                                                                   |
| fatty acid synthase                                  | Fasn      | NP_032014    | 272      | 4             | cytoplasm, glycogen granule                                                                                                                                                                                                                                                                                                                                                  | [acyl-carrier-protein] S-acyltransferase activity, [acyl-carrier-protein] S-malonyltransferase activity, 3-hydroxypalmitoyl-[acyl-carrier-protein] dehydratase activity, 3-oxoacyl-[acyl-carrier-protein] reductase activity, 3-oxoacyl-[acyl-carrier-protein] synthase activity, acyl carrier activity, acyltransferase activity, binding, catalytic activity, cofactor binding, enoyl-[acyl-carrier-protein] reductase (NADPH, B-specific) activity, fatty-acid synthase activity, hydrolase activity, hydrolase activity, acting on ester bonds, lyase activity, oleoyl-[acyl-carrier-protein] hydrolase activity, oxidoreductase activity, phosphopantetheine binding, transferase activity, zinc ion binding | biosynthetic process, fatty acid biosynthetic process, lipid biosynthetic process, metabolic process, oxidation reduction                                                                                                                                                                                                                                                                                                                                                                                                                                                                                                                                                                                                                                                                                                                                       |

| Protein Name                                       | Gene Name | Accession No | Mw (kDa) | Peptide Count | GO Component                                                                                                                                                                         | GO Function                                                                                                                                                                                                                                 | GO Process                                                                                                                                                                                                                                                                             |
|----------------------------------------------------|-----------|--------------|----------|---------------|--------------------------------------------------------------------------------------------------------------------------------------------------------------------------------------|---------------------------------------------------------------------------------------------------------------------------------------------------------------------------------------------------------------------------------------------|----------------------------------------------------------------------------------------------------------------------------------------------------------------------------------------------------------------------------------------------------------------------------------------|
| hydroxysteroid (17-beta) dehydrogenase 4           | Hsd17b4   | NP_032318    | 79       | 4             | mitochondrion, peroxisome                                                                                                                                                            | 3alpha,7alpha,12alpha-trihydroxy-5beta-cholest-24-enoyl-CoA hydratase activity, 3-hydroxyacyl-CoA dehydrogenase activity, binding, catalytic activity, isomerase activity, lyase activity, oxidoreductase activity, sterol carrier activity | fatty acid beta-oxidation, fatty acid metabolic process, lipid metabolic process, metabolic process, oxidation reduction, Sertoli cell development, very-long-chain fatty acid metabolic process                                                                                       |
| peptidase D                                        | Pepd      | NP_032846    | 55       | 4             | not classified                                                                                                                                                                       | aminopeptidase activity, dipeptidase activity, hydrolase activity, manganese ion binding, metal ion binding, metalloexopeptidase activity, metallopeptidase activity, peptidase activity                                                    | cellular process, collagen catabolic process, proteolysis                                                                                                                                                                                                                              |
| protein kinase C substrate 80K-H                   | PrkcsH    | NP_032951    | 59       | 4             | alpha-glucosidase II complex, endoplasmic reticulum                                                                                                                                  | alpha-glucosidase activity, calcium ion binding, kinase activity, protein binding, RNA binding                                                                                                                                              | N-glycan processing                                                                                                                                                                                                                                                                    |
| polypyrimidine tract binding protein 1 isoform 2   | Ptbp1     | NP_032982    | 57       | 4             | nucleus                                                                                                                                                                              | nucleic acid binding, nucleotide binding, protein binding, RNA binding                                                                                                                                                                      | mRNA processing, RNA splicing                                                                                                                                                                                                                                                          |
| SEC8                                               | Exoc4     | NP_033174    | 111      | 4             | exocyst                                                                                                                                                                              | PDZ domain binding                                                                                                                                                                                                                          | exocytosis, protein transport, transport, vesicle docking during exocytosis                                                                                                                                                                                                            |
| serine hydroxymethyltransferase 1 (soluble)        | Shmt1     | NP_033197    | 53       | 4             | cytoplasm, mitochondrion                                                                                                                                                             | catalytic activity, glycine hydroxymethyltransferase activity, methyltransferase activity, pyridoxal phosphate binding, transferase activity                                                                                                | glycine metabolic process, L-serine metabolic process, one-carbon metabolic process                                                                                                                                                                                                    |
| thiosulfate sulfurtransferase, mitochondrial       | Tst       | NP_033463    | 33       | 4             | mitochondrial inner membrane, mitochondrion                                                                                                                                          | thiosulfate sulfurtransferase activity, transferase activity                                                                                                                                                                                | sulfate transport                                                                                                                                                                                                                                                                      |
| proteasome 26S non-ATPase subunit 3                | Psmd3     | NP_033465    | 61       | 4             | proteasome complex                                                                                                                                                                   | enzyme regulator activity                                                                                                                                                                                                                   | regulation of protein catabolic process                                                                                                                                                                                                                                                |
| tubulin, beta 2                                    | Tubb2a    | NP_033476    | 50       | 4             | microtubule, protein complex                                                                                                                                                         | GTP binding, GTPase activity, nucleotide binding, structural molecule activity                                                                                                                                                              | microtubule-based movement, microtubule-based process, protein polymerization                                                                                                                                                                                                          |
| cadherin 1                                         | Cdh1      | NP_033994    | 98       | 4             | adherens junction, apical part of cell, basolateral plasma membrane, cell junction, cell-cell adherens junction, cell-cell junction, integral to membrane, membrane, plasma membrane | beta-catenin binding, calcium ion binding, protein binding, protein phosphatase binding, RPTP-like protein binding                                                                                                                          | cell adhesion, cell-cell adhesion, homophilic cell adhesion, protein homooligomerization, protein metabolic process, regulation of branching involved in salivary gland morphogenesis, regulation of caspase activity, salivary gland cavitation, trophectodermal cell differentiation |
| ferritin heavy chain 1                             | Fth1      | NP_034369    | 21       | 4             | not classified                                                                                                                                                                       | binding, ferric iron binding, ferroxidase activity, iron ion binding, metal ion binding, oxidoreductase activity                                                                                                                            | cellular iron ion homeostasis, iron ion transport, oxidation reduction                                                                                                                                                                                                                 |
| guanine nucleotide-binding protein, beta-2 subunit | Gnb2      | NP_034442    | 37       | 4             | heterotrimeric G-protein complex                                                                                                                                                     | GTPase activity, protein binding, signal transducer activity                                                                                                                                                                                | G-protein coupled receptor protein signaling pathway, signal transduction                                                                                                                                                                                                              |

| Protein Name                                                                     | Gene Name | Accession No | Mw (kDa) | Peptide Count | GO Component                                                                                                                                 | GO Function                                                                                                                                                                            | GO Process                                                                                                                                       |
|----------------------------------------------------------------------------------|-----------|--------------|----------|---------------|----------------------------------------------------------------------------------------------------------------------------------------------|----------------------------------------------------------------------------------------------------------------------------------------------------------------------------------------|--------------------------------------------------------------------------------------------------------------------------------------------------|
| galectin 3                                                                       | Lgals3    | NP_034835    | 27       | 4             | cytoplasm, nucleus, proteinaceous extracellular matrix                                                                                       | IgE binding, protein binding, sugar binding                                                                                                                                            | cell differentiation, extracellular matrix organization, skeletal system development                                                             |
| RNA binding motif protein, X-linked                                              | Rbmx      | NP_035382    | 42       | 4             | ribonucleoprotein complex                                                                                                                    | nucleic acid binding                                                                                                                                                                   | not classified                                                                                                                                   |
| bisphosphate 3'-nucleotidase 1                                                   | Bpnt1     | NP_035924    | 33       | 4             | not classified                                                                                                                               | 3'(2'),5'-bisphosphate nucleotidase activity, hydrolase activity, inositol or phosphatidylinositol phosphatase activity, lithium ion binding, magnesium ion binding, metal ion binding | not classified                                                                                                                                   |
| solute carrier family 27 (fatty acid transporter), member 2                      | Slc27a2   | NP_036108    | 70       | 4             | endoplasmic reticulum, integral to membrane, membrane, mitochondrion, peroxisome                                                             | ATP binding, catalytic activity, ligase activity, long-chain-fatty-acid-CoA ligase activity, nucleotide binding                                                                        | fatty acid metabolic process, lipid metabolic process, long-chain fatty acid metabolic process, metabolic process                                |
| heat shock protein 105                                                           | Hsph1     | NP_038587    | 96       | 4             | cytoplasm, nucleus                                                                                                                           | ATP binding, nucleotide binding, protein binding                                                                                                                                       | chaperone mediated protein folding requiring cofactor, response to stress                                                                        |
| splicing factor 3a, subunit 2                                                    | Sf3a2     | NP_038679    | 51       | 4             | nucleus                                                                                                                                      | metal ion binding, RNA splicing factor activity, transesterification mechanism, zinc ion binding                                                                                       | nuclear mRNA splicing, via spliceosome                                                                                                           |
| vacuolar protein sorting 45                                                      | Vps45     | NP_038869    | 65       | 4             | endosome, Golgi apparatus, membrane                                                                                                          | protein binding                                                                                                                                                                        | protein transport, transport, vesicle docking during exocytosis, vesicle mediated transport                                                      |
| translocase of inner mitochondrial membrane 9 homolog                            | Timm13    | NP_038923    | 10       | 4             | mitochondrion                                                                                                                                | not classified                                                                                                                                                                         | not classified                                                                                                                                   |
| AU RNA-binding enoyl-coenzyme A hydratase                                        | Auh       | NP_057918    | 33       | 4             | mitochondrion                                                                                                                                | catalytic activity, enoyl-CoA hydratase activity, lyase activity, methylglutaconyl-CoA hydratase activity, RNA binding                                                                 | branched chain family amino acid catabolic process, metabolic process, nuclear-transcribed mRNA catabolic process, deadenylation-dependent decay |
| enoyl coenzyme A hydratase 1, peroxisomal                                        | Ech1      | NP_058052    | 36       | 4             | mitochondrion, peroxisome                                                                                                                    | catalytic activity, isomerase activity                                                                                                                                                 | fatty acid metabolic process, lipid metabolic process, metabolic process                                                                         |
| thioredoxin-like 1                                                               | Txn1      | NP_058072    | 32       | 4             | cytoplasm                                                                                                                                    | not classified                                                                                                                                                                         | cell redox homeostasis, electron transport chain, transport                                                                                      |
| ribosomal protein L5                                                             | Rpl5      | NP_058676    | 34       | 4             | cytoplasm, intracellular, nucleus, ribonucleoprotein complex, ribosome                                                                       | 5S rRNA binding, protein binding, RNA binding, rRNA binding, structural constituent of ribosome                                                                                        | biological_process, translation                                                                                                                  |
| 3-monooxygenase/tryptophan 5-monooxygenase activation protein, gamma polypeptide | Ywhag     | NP_061359    | 28       | 4             | cellular_component, cytoplasm                                                                                                                | protein domain specific binding                                                                                                                                                        | protein targeting                                                                                                                                |
| ribophorin II                                                                    | Rpn2      | NP_062616    | 69       | 4             | cellular_component, endoplasmic reticulum, endoplasmic reticulum membrane, integral to membrane, membrane, oligosaccharyltransferase complex | dolichyl-diphosphooligosaccharid e-protein glycotransferase activity, molecular_function, transferase activity                                                                         | biological_process, protein amino acid N-linked glycosylation via asparagine                                                                     |
| ADP-ribosylation factor-like 3                                                   | Arl3      | NP_062692    | 20       | 4             | Golgi apparatus, intracellular, membrane, nucleus                                                                                            | GTP binding, magnesium ion binding, metal ion binding, nucleotide binding                                                                                                              | cell cycle, cell division, small GTPase mediated signal transduction                                                                             |
| DnaJ (Hsp40) homolog, subfamily A, member 2                                      | Dnaja2    | NP_062768    | 46       | 4             | membrane                                                                                                                                     | heat shock protein binding, metal ion binding, unfolded protein binding, zinc ion binding                                                                                              | protein folding                                                                                                                                  |
| DnaJ (Hsp40) homolog, subfamily C, member 7                                      | Dnajc7    | NP_062769    | 56       | 4             | not classified                                                                                                                               | binding, heat shock protein binding                                                                                                                                                    | not classified                                                                                                                                   |

| Protein Name                                                                  | Gene Name     | Accession No | Mw (kDa) | Peptide Count | GO Component                                                                                        | GO Function                                                                                                                                                                                                                     | GO Process                                                                                                                                                                                                                        |
|-------------------------------------------------------------------------------|---------------|--------------|----------|---------------|-----------------------------------------------------------------------------------------------------|---------------------------------------------------------------------------------------------------------------------------------------------------------------------------------------------------------------------------------|-----------------------------------------------------------------------------------------------------------------------------------------------------------------------------------------------------------------------------------|
| actin related protein 2/3 complex, subunit 3                                  | Arpc3         | NP_062798    | 21       | 4             | Arp2/3 protein complex, cell projection, cytoplasm, cytoskeleton, lamellipodium                     | actin binding                                                                                                                                                                                                                   | regulation of actin filament polymerization                                                                                                                                                                                       |
| mitochondrial carrier homolog 1                                               | Mtch1         | NP_063933    | 42       | 4             | integral to membrane, membrane, mitochondrial inner membrane, mitochondrion                         | not classified                                                                                                                                                                                                                  | apoptosis, transport                                                                                                                                                                                                              |
| DnaJ (Hsp40) homolog, subfamily B, member 12                                  | Dnajb12       | NP_064349    | 42       | 4             | integral to membrane, membrane                                                                      | heat shock protein binding, unfolded protein binding                                                                                                                                                                            | protein folding                                                                                                                                                                                                                   |
| aspartyl beta-hydroxylase isoform 1                                           | Asph          | NP_075553    | 83       | 4             | endoplasmic reticulum, integral to endoplasmic reticulum membrane, integral to membrane, membrane   | binding, iron ion binding, oxidoreductase activity, oxidoreductase activity, acting on single donors with incorporation of molecular oxygen, incorporation of two atoms of oxygen, peptide, aspartate beta-dioxygenase activity | face morphogenesis, limb morphogenesis, negative regulation of cell proliferation, oxidation reduction, palate development, pattern specification process, peptidyl-amino acid modification, peptidyl-aspartic acid hydroxylation |
| ribosomal protein S19                                                         | Rps19         | NP_075622    | 16       | 4             | intracellular, nucleolus, ribonucleoprotein complex, ribosome                                       | protein binding, structural constituent of ribosome                                                                                                                                                                             | translation                                                                                                                                                                                                                       |
| chromosome segregation 1-like                                                 | Cse1l         | NP_076054    | 110      | 4             | cytoplasm, nucleus                                                                                  | binding, importin-alpha export receptor activity, protein transporter activity                                                                                                                                                  | cell proliferation, intracellular protein transport, protein transport, transport                                                                                                                                                 |
| importin 5                                                                    | Ipo5          | NP_076068    | 124      | 4             | cytoplasm, nucleus                                                                                  | binding, protein binding, protein transporter activity                                                                                                                                                                          | intracellular protein transport, protein transport, transport                                                                                                                                                                     |
| ribosomal protein L24                                                         | Rpl24         | NP_077180    | 18       | 4             | cytosolic large ribosomal subunit, intracellular, ribonucleoprotein complex, ribosome               | structural constituent of ribosome                                                                                                                                                                                              | exit from mitosis, G1/S transition checkpoint, optic nerve development, retina development in camera-type eye, retinal ganglion cell axon guidance, ribosomal large subunit assembly, translation                                 |
| transmembrane protein 14C                                                     | Tmem14c       | NP_079663    | 12       | 4             | integral to membrane, membrane, mitochondrion                                                       | not classified                                                                                                                                                                                                                  | not classified                                                                                                                                                                                                                    |
| mitochondrial ribosomal protein S28                                           | Mrps28        | NP_079710    | 21       | 4             | mitochondrion, ribonucleoprotein complex, ribosome                                                  | not classified                                                                                                                                                                                                                  | not classified                                                                                                                                                                                                                    |
| hypothetical protein LOC66302                                                 | 2410005O16Rik | NP_079752    | 35       | 4             | cytoplasm, microtubule                                                                              | binding                                                                                                                                                                                                                         | not classified                                                                                                                                                                                                                    |
| DC2 protein                                                                   | 2310008M10Rik | NP_079785    | 17       | 4             | integral to membrane, membrane                                                                      | not classified                                                                                                                                                                                                                  | not classified                                                                                                                                                                                                                    |
| ribosomal protein L15                                                         | Rpl15         | NP_079862    | 24       | 4             | cellular_component, intracellular, ribonucleoprotein complex, ribosome                              | molecular_function, structural constituent of ribosome                                                                                                                                                                          | biological_process, translation                                                                                                                                                                                                   |
| translocase of inner mitochondrial membrane 50 homolog                        | Timm50        | NP_079892    | 40       | 4             | integral to membrane, membrane, mitochondrial inner membrane, mitochondrion                         | interleukin-2 receptor binding, phosphoprotein phosphatase activity, protein binding                                                                                                                                            | protein transport, release of cytochrome c from mitochondria, transmembrane transport, transport                                                                                                                                  |
| cysteine and histidine-rich domain (CHORD)-containing, zinc-binding protein 1 | Chordc1       | NP_080120    | 37       | 4             | not classified                                                                                      | calcium ion binding, metal ion binding, zinc ion binding                                                                                                                                                                        | not classified                                                                                                                                                                                                                    |
| succinate dehydrogenase complex, subunit D, integral membrane protein         | Sdhd          | NP_080124    | 17       | 4             | integral to membrane, membrane, mitochondrial envelope, mitochondrial inner membrane, mitochondrion | heme binding, iron ion binding, metal ion binding                                                                                                                                                                               | electron transport chain, transport, tricarboxylic acid cycle                                                                                                                                                                     |

| Protein Name                                                                           | Gene Name      | Accession No | Mw (kDa) | Peptide Count | GO Component                                                                                                                                            | GO Function                                                                                                                                                                      | GO Process                                                                                                                                                        |
|----------------------------------------------------------------------------------------|----------------|--------------|----------|---------------|---------------------------------------------------------------------------------------------------------------------------------------------------------|----------------------------------------------------------------------------------------------------------------------------------------------------------------------------------|-------------------------------------------------------------------------------------------------------------------------------------------------------------------|
| N-ethylmaleimide sensitive fusion protein attachment protein alpha                     | Napa           | NP_080174    | 33       | 4             | endoplasmic reticulum, Golgi apparatus, membrane, synaptobrevin 2-SNAP-25-syntaxin-1a complex                                                           | binding, SNARE binding, syntaxin binding                                                                                                                                         | apical protein localization, brain development, intracellular protein transport, neuron differentiation, protein transport, transport, vesicle-mediated transport |
| ribosomal protein L14                                                                  | Rpl14          | NP_080250    | 24       | 4             | cellular_component, intracellular, ribonucleoprotein complex, ribosome                                                                                  | molecular_function, structural constituent of ribosome                                                                                                                           | biological_process, translation                                                                                                                                   |
| hypothetical protein LOC67432                                                          | O610010D20 Rik | NP_080428    | 35       | 4             | mitochondrion                                                                                                                                           | catalytic activity, lyase activity, molecular_function                                                                                                                           | biological_process, metabolic process                                                                                                                             |
| CDP-diacylglycerol--inositol 3-phosphatidyltransferase (phosphatidylinositol synthase) | Cdipt          | NP_080914    | 24       | 4             | endoplasmic reticulum, Golgi apparatus, integral to membrane, membrane, plasma membrane                                                                 | CDP-diacylglycerol-inositol 3-phosphatidyltransferase activity, manganese ion binding, phosphotransferase activity, for other substituted phosphate groups, transferase activity | phospholipid biosynthetic process                                                                                                                                 |
| dimethylarginine dimethylaminohydrolase 1                                              | Ddah1          | NP_081269    | 31       | 4             | cytoplasm                                                                                                                                               | dimethylargininase activity, hydrolase activity, hydrolase activity, acting on carbon-nitrogen (but not peptide) bonds, in linear amidines, metal ion binding, zinc ion binding  | nitric oxide biosynthetic process, protein amino acid nitrosylation                                                                                               |
| hypothetical protein LOC69225                                                          | O710008K08 Rik | NP_081271    | 37       | 4             | cellular_component                                                                                                                                      | molecular_function                                                                                                                                                               | biological_process                                                                                                                                                |
| ribosomal protein S27                                                                  | Rps27          | NP_081291    | 9        | 4             | intracellular, ribonucleoprotein complex, ribosome                                                                                                      | metal ion binding, protein binding, structural constituent of ribosome, zinc ion binding                                                                                         | translation                                                                                                                                                       |
| aspartoacylase-3                                                                       | Acy3           | NP_082133    | 35       | 4             | apical plasma membrane, cytoplasm, membrane fraction                                                                                                    | aminoacylase activity, aspartoacylase activity, hydrolase activity, acting on ester bonds, identical protein binding, metal ion binding, zinc ion binding                        | metabolic process                                                                                                                                                 |
| acyl-CoA synthetase long-chain family member 5                                         | Acsf5          | NP_082252    | 76       | 4             | endoplasmic reticulum, integral to membrane, membrane, microsome, mitochondrial inner membrane, mitochondrial outer membrane, mitochondrion, peroxisome | ATP binding, catalytic activity, ligase activity, long-chain-fatty-acid-CoA ligase activity, magnesium ion binding, molecular_function, nucleotide binding                       | biological_process, fatty acid metabolic process, lipid metabolic process, metabolic process                                                                      |
| methylmalonyl CoA epimerase                                                            | Mcee           | NP_082902    | 19       | 4             | mitochondrion                                                                                                                                           | isomerase activity, methylmalonyl-CoA epimerase activity                                                                                                                         | not classified                                                                                                                                                    |
| EF hand domain containing 1                                                            | Efhd1          | NP_083165    | 27       | 4             | mitochondrial inner membrane                                                                                                                            | calcium ion binding                                                                                                                                                              | neuron projection development                                                                                                                                     |
| RAB1B, member RAS oncogene family                                                      | Rab1b          | NP_083852    | 22       | 4             | cytoplasm, membrane                                                                                                                                     | GTP binding, nucleotide binding                                                                                                                                                  | protein transport, small GTPase mediated signal transduction, transport                                                                                           |
| actin related protein 2/3 complex, subunit 2                                           | Arpc2          | NP_083987    | 34       | 4             | Arp2/3 protein complex, cell leading edge, cell projection, cytoplasm, cytoskeleton, focal adhesion                                                     | actin binding, protein binding                                                                                                                                                   | positive regulation of actin filament polymerization, regulation of actin filament polymerization                                                                 |
| splicing factor 3b, subunit 2                                                          | Sf3b2          | NP_084385    | 98       | 4             | not classified                                                                                                                                          | protein binding                                                                                                                                                                  | not classified                                                                                                                                                    |

| Protein Name                                                 | Gene Name     | Accession No | Mw (kDa) | Peptide Count | GO Component                                                                | GO Function                                                                                                                                                                                                              | GO Process                                                                                             |
|--------------------------------------------------------------|---------------|--------------|----------|---------------|-----------------------------------------------------------------------------|--------------------------------------------------------------------------------------------------------------------------------------------------------------------------------------------------------------------------|--------------------------------------------------------------------------------------------------------|
| regulator of nonsense transcripts 1                          | Upf1          | NP_109605    | 123      | 4             | cytoplasm                                                                   | ATP binding, DNA binding, helicase activity, hydrolase activity, metal ion binding, nucleotide binding, zinc ion binding                                                                                                 | nuclear-transcribed mRNA catabolic process, nonsense-mediated decay                                    |
| nudix (nucleoside diphosphate linked moiety X)-type motif 19 | Nudt19        | NP_149071    | 40       | 4             | mitochondrion, peroxisome                                                   | hydrolase activity, magnesium ion binding, manganese ion binding, metal ion binding                                                                                                                                      | not classified                                                                                         |
| glyoxylate reductase/hydroxypyruvate reductase               | Grhpr         | NP_525028    | 35       | 4             | not classified                                                              | binding, catalytic activity, cofactor binding, glyoxylate reductase (NADP) activity, NAD or NADH binding, oxidoreductase activity, oxidoreductase activity, acting on the CH-OH group of donors, NAD or NADP as acceptor | metabolic process, oxidation reduction                                                                 |
| rhotekin isoform 3                                           | Rtkn          | NP_598396    | 61       | 4             | intracellular                                                               | GTP binding, GTPase inhibitor activity, GTP-Rho binding, nucleotide binding, Rho GTPase binding                                                                                                                          | apoptosis, signal transduction                                                                         |
| cytoplasmic FMR1 interacting protein 2                       | Cyfp2         | NP_598530    | 146      | 4             | cell junction, cytoplasm, synapse, synaptosome                              | molecular_function, protein binding                                                                                                                                                                                      | apoptosis, biological_process, cell adhesion                                                           |
| heterogeneous nuclear ribonucleoprotein F                    | Hnmpf         | NP_598595    | 46       | 4             | nucleus, ribonucleoprotein complex, spliceosomal complex                    | nucleic acid binding, nucleotide binding, RNA binding                                                                                                                                                                    | mRNA processing, RNA splicing                                                                          |
| DEAD (Asp-Glu-Ala-Asp) box polypeptide 1                     | Ddx1          | NP_598801    | 83       | 4             | ribonucleoprotein complex                                                   | ATP binding, ATP-dependent helicase activity, helicase activity, hydrolase activity, molecular_function, nucleic acid binding, nucleotide binding, RNA binding                                                           | biological_process                                                                                     |
| glycoprotein, synaptic 2                                     | Gpsn2         | NP_598879    | 36       | 4             | cytoplasm, endoplasmic reticulum, integral to membrane, membrane            | oxidoreductase activity, oxidoreductase activity, acting on the CH-CH group of donors                                                                                                                                    | lipid biosynthetic process, lipid metabolic process, oxidation reduction, steroid biosynthetic process |
| otubain 1                                                    | Otub1         | NP_598911    | 31       | 4             | not classified                                                              | cysteine-type peptidase activity, hydrolase activity, peptidase activity                                                                                                                                                 | immune response, modification-dependent protein catabolic process                                      |
| virus-induced signaling adapter                              | D430028G21Rik | NP_659137    | 53       | 4             | integral to membrane, membrane, mitochondrial outer membrane, mitochondrion | not classified                                                                                                                                                                                                           | immune response, innate immune response, response to virus                                             |
| hypothetical protein LOC109168                               | 5730596K20Rik | NP_666203    | 61       | 4             | integral to membrane, membrane                                              | GTP binding, GTPase activity, nucleotide binding                                                                                                                                                                         | not classified                                                                                         |
| 5-oxoprolinase (ATP-hydrolysing)                             | Oplah         | NP_694762    | 138      | 4             | not classified                                                              | 5-oxoprolinase (ATP-hydrolysing) activity, ATP binding, catalytic activity, hydrolase activity, nucleotide binding                                                                                                       | not classified                                                                                         |
| solute carrier family 25, member 1                           | Slc25a1       | NP_694790    | 34       | 4             | integral to membrane, membrane, mitochondrial inner membrane, mitochondrion | not classified                                                                                                                                                                                                           | transport                                                                                              |
| acyl-CoA synthetase family member 2                          | Acsf2         | NP_722502    | 68       | 4             | mitochondrion                                                               | ATP binding, catalytic activity, ligase activity, nucleotide binding                                                                                                                                                     | fatty acid metabolic process, lipid metabolic process, metabolic process                               |

| Protein Name                                             | Gene Name      | Accession No | Mw (kDa) | Peptide Count | GO Component                                                                                                 | GO Function                                                                                                                                                                                      | GO Process                                                                                                                                                                                                                                                                                                                                                                                                                    |
|----------------------------------------------------------|----------------|--------------|----------|---------------|--------------------------------------------------------------------------------------------------------------|--------------------------------------------------------------------------------------------------------------------------------------------------------------------------------------------------|-------------------------------------------------------------------------------------------------------------------------------------------------------------------------------------------------------------------------------------------------------------------------------------------------------------------------------------------------------------------------------------------------------------------------------|
| phospholipase C, gamma 2                                 | Plcg2          | NP_758489    | 148      | 4             | not classified                                                                                               | calcium ion binding, hydrolase activity, phosphoinositide phospholipase C activity, phospholipase C activity, phosphoric diester hydrolase activity, protein binding, signal transducer activity | activation of store-operated calcium channel activity, follicular B cell differentiation, inositol trisphosphate biosynthetic process, intracellular signaling cascade, lipid catabolic process, lipid metabolic process, negative regulation of programmed cell death, phospholipid catabolic process, regulation of gene expression, response to lipopolysaccharide, signal transduction, T cell receptor signaling pathway |
| splicing factor, arginine/serine-rich 1 isoform 1        | Sfrs1          | NP_775550    | 28       | 4             | cytoplasm, nucleus, spliceosomal complex                                                                     | nucleic acid binding, nucleotide binding, RNA binding, RS domain binding                                                                                                                         | cardiac muscle contraction, in utero embryonic development, mRNA processing, RNA splicing                                                                                                                                                                                                                                                                                                                                     |
| ilvB (bacterial acetolactate synthase)-like              | Ilvbl          | NP_776112    | 68       | 4             | integral to membrane, membrane                                                                               | catalytic activity, magnesium ion binding, metal ion binding, thiamin pyrophosphate binding, transferase activity                                                                                | not classified                                                                                                                                                                                                                                                                                                                                                                                                                |
| transmembrane protein 65                                 | Tmem65         | NP_780421    | 25       | 4             | integral to membrane, membrane                                                                               | not classified                                                                                                                                                                                   | not classified                                                                                                                                                                                                                                                                                                                                                                                                                |
| hypothetical protein LOC109154                           | 2410014A08 Rik | NP_780612    | 32       | 4             | endoplasmic reticulum, integral to membrane, membrane                                                        | not classified                                                                                                                                                                                   | carbohydrate metabolic process                                                                                                                                                                                                                                                                                                                                                                                                |
| U5 snRNP-specific protein, 200 kDa                       | Ascc31         | NP_796188    | 245      | 4             | ribonucleoprotein complex                                                                                    | ATP binding, helicase activity, hydrolase activity, nucleic acid binding, nucleotide binding                                                                                                     | not classified                                                                                                                                                                                                                                                                                                                                                                                                                |
| MAL2 proteolipid protein                                 | Mal2           | NP_849251    | 19       | 4             | integral to membrane, membrane, plasma membrane                                                              | not classified                                                                                                                                                                                   | not classified                                                                                                                                                                                                                                                                                                                                                                                                                |
| glutathione S-transferase, pi 2                          | Gstp2          | NP_861461    | 24       | 4             | not classified                                                                                               | glutathione transferase activity, transferase activity                                                                                                                                           | glutathione metabolic process, metabolic process                                                                                                                                                                                                                                                                                                                                                                              |
| pleckstrin homology domain containing, family A member 6 | Plekha6        | NP_891846    | 131      | 4             | not classified                                                                                               | not classified                                                                                                                                                                                   | not classified                                                                                                                                                                                                                                                                                                                                                                                                                |
| erythrocyte protein band 4.1                             | Epb4.1         | NP_906273    | 96       | 4             | actin cytoskeleton, cortical cytoskeleton, cytoplasm, cytoskeleton, extrinsic to membrane, membrane, nucleus | actin binding, cytoskeletal protein binding, spectrin binding, structural molecule activity                                                                                                      | actin cytoskeleton organization, cortical actin cytoskeleton organization, regulation of cell shape                                                                                                                                                                                                                                                                                                                           |
| ubiquinol-cytochrome c reductase complex protein         | 1110020P15 Rik | NP_932096    | 7        | 4             | membrane, mitochondrial envelope, mitochondrial inner membrane, mitochondrion, respiratory chain             | ubiquinol-cytochrome-c reductase activity                                                                                                                                                        | electron transport chain, mitochondrial electron transport, ubiquinol to cytochrome c, transport                                                                                                                                                                                                                                                                                                                              |
| tyrosyl-tRNA synthetase 2, mitochondrial                 | Yars2          | NP_937889    | 53       | 4             | cytoplasm, mitochondrion                                                                                     | aminoacyl-tRNA ligase activity, ATP binding, ligase activity, nucleotide binding, tyrosine-tRNA ligase activity                                                                                  | translation, tRNA aminoacylation for protein translation, tyrosyl-tRNA aminoacylation                                                                                                                                                                                                                                                                                                                                         |
| PREDICTED: similar to Rab6-interacting protein 2         | LOC100048600   | XP_001480600 | 128      | 4             | not classified                                                                                               | not classified                                                                                                                                                                                   | not classified                                                                                                                                                                                                                                                                                                                                                                                                                |
| PREDICTED: hypothetical protein                          | EG665562       | XP_915749    | 14       | 4             | not classified                                                                                               | not classified                                                                                                                                                                                   | not classified                                                                                                                                                                                                                                                                                                                                                                                                                |
| PREDICTED: hypothetical protein                          | EG629116       | XP_916411    | 15       | 4             | cellular component                                                                                           | molecular function                                                                                                                                                                               | biological process                                                                                                                                                                                                                                                                                                                                                                                                            |
| enhanced green fluorescent protein                       | egfp           | AAB02572     | 27       | 3             | not classified                                                                                               | not classified                                                                                                                                                                                   | not classified                                                                                                                                                                                                                                                                                                                                                                                                                |
| reticulon 1 isoform RTN1-C                               | Rtn1           | NP_001007597 | 24       | 3             | endoplasmic reticulum, integral to membrane, membrane                                                        | molecular_function                                                                                                                                                                               | biological_process                                                                                                                                                                                                                                                                                                                                                                                                            |
| pleckstrin homology domain containing, family N member 1 | Plekhn1        | NP_001008234 | 39       | 3             | not classified                                                                                               | protein binding                                                                                                                                                                                  | not classified                                                                                                                                                                                                                                                                                                                                                                                                                |
| hypothetical protein LOC228715                           | Gm561          | NP_001028469 | 12       | 3             | not classified                                                                                               | not classified                                                                                                                                                                                   | not classified                                                                                                                                                                                                                                                                                                                                                                                                                |

| Protein Name                                                                        | Gene Name     | Accession No | Mw (kDa) | Peptide Count | GO Component                                  | GO Function                                                                                                                                                                                         | GO Process                                                                                                                                                                                                                                                                                                                                                                                                                                                                                                                                                                                                                                                                                                                                                                                                                                                                                                              |
|-------------------------------------------------------------------------------------|---------------|--------------|----------|---------------|-----------------------------------------------|-----------------------------------------------------------------------------------------------------------------------------------------------------------------------------------------------------|-------------------------------------------------------------------------------------------------------------------------------------------------------------------------------------------------------------------------------------------------------------------------------------------------------------------------------------------------------------------------------------------------------------------------------------------------------------------------------------------------------------------------------------------------------------------------------------------------------------------------------------------------------------------------------------------------------------------------------------------------------------------------------------------------------------------------------------------------------------------------------------------------------------------------|
| exportin 1, CRM1 homolog                                                            | Xpo1          | NP_001030303 | 123      | 3             | cytoplasm, nucleus, ribonucleoprotein complex | binding, protein binding, protein transporter activity, RNA binding                                                                                                                                 | intracellular protein transport, mRNA transport, protein export from nucleus, protein localization in nucleus, protein transport, regulation of centrosome duplication, regulation of protein catabolic process, transport                                                                                                                                                                                                                                                                                                                                                                                                                                                                                                                                                                                                                                                                                              |
| haloacid dehalogenase-like hydrolase domain containing 2 isoform 1                  | Hdhd2         | NP_001034290 | 29       | 3             | not classified                                | catalytic activity, hydrolase activity                                                                                                                                                              | metabolic process                                                                                                                                                                                                                                                                                                                                                                                                                                                                                                                                                                                                                                                                                                                                                                                                                                                                                                       |
| SCO cytochrome oxidase deficient homolog 1                                          | Sco1          | NP_001035115 | 32       | 3             | mitochondrial inner membrane, mitochondrion   | copper ion binding, metal ion binding                                                                                                                                                               | cell redox homeostasis, cellular copper ion homeostasis, copper ion transport, respiratory chain complex IV assembly                                                                                                                                                                                                                                                                                                                                                                                                                                                                                                                                                                                                                                                                                                                                                                                                    |
| hypothetical protein LOC68646 isoform 2                                             | 1110020G09Rik | NP_001035485 | 48       | 3             | mitochondrion                                 | NAD+ kinase activity                                                                                                                                                                                | metabolic process                                                                                                                                                                                                                                                                                                                                                                                                                                                                                                                                                                                                                                                                                                                                                                                                                                                                                                       |
| limkain b1                                                                          | 4921513D23Rik | NP_001074623 | 193      | 3             | peroxisome                                    | nucleic acid binding, nucleotide binding, RNA binding                                                                                                                                               | not classified                                                                                                                                                                                                                                                                                                                                                                                                                                                                                                                                                                                                                                                                                                                                                                                                                                                                                                          |
| phosphogluconate dehydrogenase                                                      | Pgd           | NP_001074743 | 53       | 3             | not classified                                | binding, catalytic activity, coenzyme binding, NADP or NADPH binding, oxidoreductase activity, phosphogluconate 2-dehydrogenase activity, phosphogluconate dehydrogenase (decarboxylating) activity | metabolic process, oxidation reduction, pentose biosynthetic process, pentose-phosphate shunt                                                                                                                                                                                                                                                                                                                                                                                                                                                                                                                                                                                                                                                                                                                                                                                                                           |
| methyl CpG binding protein 2 isoform 1                                              | Mecp2         | NP_001075448 | 54       | 3             | cytoplasm, cytosol, heterochromatin, nucleus  | DNA binding, double-stranded methylated DNA binding, methyl-CpG binding, mRNA binding, siRNA binding, transcription factor activity, transcription factor binding, transcription repressor activity | adult locomotory behavior, behavioral fear response, biogenic amine metabolic process, brain development, cardiolipin metabolic process, catecholamine secretion, cerebellum development, chromatin silencing, dendrite development, embryonic development, genetic imprinting, glucocorticoid metabolic process, glutamine metabolic process, histone acetylation, histone methylation, inositol metabolic process, learning, long-term memory, long-term synaptic potentiation, memory, mitochondrial electron transport, ubiquinol to cytochrome c, negative regulation of histone acetylation, negative regulation of histone methylation, negative regulation of neuron apoptosis, negative regulation of transcription, negative regulation of transcription, DNA-dependent, neurological system process involved in regulation of systemic arterial blood pressure, neuromuscular process, neuromuscular process |
| Bcl-2 inhibitor of transcription isoform b                                          | Pthr2         | NP_001092280 | 20       | 3             | mitochondrion                                 | aminoacyl-tRNA hydrolase activity, hydrolase activity                                                                                                                                               | translation                                                                                                                                                                                                                                                                                                                                                                                                                                                                                                                                                                                                                                                                                                                                                                                                                                                                                                             |
| ADP-ribosylation factor guanine nucleotide-exchange factor 1(brefeldin A-inhibited) | Arfgef1       | NP_001095900 | 208      | 3             | cellular_component                            | molecular_function                                                                                                                                                                                  | biological_process                                                                                                                                                                                                                                                                                                                                                                                                                                                                                                                                                                                                                                                                                                                                                                                                                                                                                                      |



| Protein Name                                             | Gene Name | Accession No | Mw (kDa) | Peptide Count | GO Component                                                                                                                                                                            | GO Function                                                                                                                                                                                                                                                                         | GO Process                                                                                                                                                                                |
|----------------------------------------------------------|-----------|--------------|----------|---------------|-----------------------------------------------------------------------------------------------------------------------------------------------------------------------------------------|-------------------------------------------------------------------------------------------------------------------------------------------------------------------------------------------------------------------------------------------------------------------------------------|-------------------------------------------------------------------------------------------------------------------------------------------------------------------------------------------|
| catenin (cadherin associated protein), alpha 2 isoform 2 | Ctnna2    | NP_001103234 | 105      | 3             | actin cytoskeleton, adherens junction, axon, basolateral plasma membrane, cell junction, cell-cell adherens junction, cytoplasm, cytoskeleton, lamellipodium, membrane, plasma membrane | cadherin binding, protein binding, structural molecule activity                                                                                                                                                                                                                     | axonogenesis, brain morphogenesis, cell adhesion, dendrite morphogenesis, prepulse inhibition, radial glia guided migration of Purkinje cell, regulation of synapse structural plasticity |
| heterogeneous nuclear ribonucleoprotein M isoform b      | Hnrnpm    | NP_001103383 | 74       | 3             | nucleus, ribonucleoprotein complex, spliceosomal complex                                                                                                                                | nucleic acid binding, nucleotide binding, RNA binding                                                                                                                                                                                                                               | mRNA processing, RNA splicing                                                                                                                                                             |
| peptidylprolyl isomerase H isoform 1                     | Ppih      | NP_001103599 | 19       | 3             | cytoplasm, nucleus, spliceosomal complex                                                                                                                                                | isomerase activity, peptidyl-prolyl cis-trans isomerase activity                                                                                                                                                                                                                    | mRNA processing, protein folding, RNA splicing                                                                                                                                            |
| acid phosphatase 1, soluble isoform 1                    | Acp1      | NP_001103709 | 18       | 3             | cytoplasm                                                                                                                                                                               | acid phosphatase activity, hydrolase activity, non-membrane spanning protein tyrosine phosphatase activity, phosphatase activity, phosphoprotein phosphatase activity, protein tyrosine phosphatase activity                                                                        | protein amino acid dephosphorylation                                                                                                                                                      |
| ribosomal protein L27-like                               | EG621100  | NP_001103809 | 16       | 3             | not classified                                                                                                                                                                          | not classified                                                                                                                                                                                                                                                                      | not classified                                                                                                                                                                            |
| aspartyl aminopeptidase isoform a                        | Dnpep     | NP_001104301 | 52       | 3             | cytoplasm, vacuole                                                                                                                                                                      | aminopeptidase activity, hydrolase activity, metal ion binding, metalloproteinase activity, peptidase activity, zinc ion binding                                                                                                                                                    | proteolysis                                                                                                                                                                               |
| ribosomal protein L21-like                               | EG668319  | NP_001104783 | 19       | 3             | not classified                                                                                                                                                                          | not classified                                                                                                                                                                                                                                                                      | not classified                                                                                                                                                                            |
| adenylosuccinate synthetase 1                            | Adss1     | NP_031447    | 50       | 3             | cytoplasm, membrane                                                                                                                                                                     | adenylosuccinate synthase activity, GTP binding, ligase activity, magnesium ion binding, metal ion binding, nucleotide binding, protein binding                                                                                                                                     | purine nucleotide biosynthetic process, purine nucleotide metabolic process                                                                                                               |
| adenylosuccinate synthetase, non muscle                  | Adss      | NP_031448    | 50       | 3             | cytoplasm                                                                                                                                                                               | adenylosuccinate synthase activity, GTP binding, ligase activity, magnesium ion binding, metal ion binding, nucleotide binding                                                                                                                                                      | AMP biosynthetic process, purine nucleotide biosynthetic process                                                                                                                          |
| ADP-ribosylation factor 4                                | Arf4      | NP_031505    | 20       | 3             | cytoplasm, Golgi apparatus, intracellular, plasma membrane                                                                                                                              | GTP binding, nucleotide binding                                                                                                                                                                                                                                                     | protein transport, small GTPase mediated signal transduction, transport, vesicle-mediated transport                                                                                       |
| chaperonin containing Tcp1, subunit 5 (epsilon)          | Cct5      | NP_031663    | 60       | 3             | chaperonin-containing T-complex, cytoplasm                                                                                                                                              | ATP binding, nucleotide binding, protein binding, unfolded protein binding                                                                                                                                                                                                          | cellular protein metabolic process, protein folding                                                                                                                                       |
| DEAD (Asp-Glu-Ala-Asp) box polypeptide 5                 | Ddx5      | NP_031866    | 69       | 3             | nucleus, ribonucleoprotein complex, spliceosomal complex                                                                                                                                | ATP binding, ATP-dependent helicase activity, helicase activity, hydrolase activity, acting on acid anhydrides, in phosphorus-containing anhydrides, nucleic acid binding, nucleotide binding, protein binding, RNA binding, RNA helicase activity, transcription cofactor activity | mRNA processing, positive regulation of transcription, RNA splicing                                                                                                                       |

| Protein Name                                                                               | Gene Name | Accession No | Mw (kDa) | Peptide Count | GO Component                                                           | GO Function                                                                                                                                                 | GO Process                                                                                                                                                                                                                                                                                                                                                          |
|--------------------------------------------------------------------------------------------|-----------|--------------|----------|---------------|------------------------------------------------------------------------|-------------------------------------------------------------------------------------------------------------------------------------------------------------|---------------------------------------------------------------------------------------------------------------------------------------------------------------------------------------------------------------------------------------------------------------------------------------------------------------------------------------------------------------------|
| diaphanous homolog 1                                                                       | Diap1     | NP_031884    | 139      | 3             | cell projection, cytoplasm, cytoskeleton, membrane, plasma membrane    | actin binding, protein binding, Rho GTPase binding                                                                                                          | actin cytoskeleton organization, actin filament polymerization, cellular component organization, sensory perception of sound                                                                                                                                                                                                                                        |
| Ddx19-like protein                                                                         | Ddx19a    | NP_031942    | 54       | 3             | cytoplasm, membrane, nuclear pore, nucleus                             | ATP binding, ATP-dependent helicase activity, helicase activity, hydrolase activity, nucleic acid binding, nucleotide binding, protein binding, RNA binding | mRNA transport, protein transport, transmembrane transport, transport                                                                                                                                                                                                                                                                                               |
| DnaJ (Hsp40) homolog, subfamily A, member 1                                                | Dnaja1    | NP_032324    | 45       | 3             | membrane                                                               | heat shock protein binding, low-density lipoprotein receptor binding, metal ion binding, unfolded protein binding, zinc ion binding                         | androgen receptor signaling pathway, protein folding, sperm motility, spermatogenesis                                                                                                                                                                                                                                                                               |
| eukaryotic translation initiation factor 3, subunit 6                                      | Eif3e     | NP_032414    | 52       | 3             | cytoplasm, eukaryotic translation initiation factor 3 complex, nucleus | translation initiation factor activity                                                                                                                      | translation, translational initiation                                                                                                                                                                                                                                                                                                                               |
| aminolevulinatase, delta-, dehydratase                                                     | Alad      | NP_032551    | 36       | 3             | not classified                                                         | catalytic activity, identical protein binding, lyase activity, metal ion binding, porphobilinogen synthase activity, zinc ion binding                       | heme biosynthetic process, metabolic process, porphyrin biosynthetic process, tetrapyrrole biosynthetic process                                                                                                                                                                                                                                                     |
| solute carrier family 3 (activators of dibasic and neutral amino acid transport), member 2 | Slc3a2    | NP_032603    | 58       | 3             | integral to membrane, membrane, plasma membrane                        | catalytic activity, cation binding, protein binding                                                                                                         | amino acid transport, carbohydrate metabolic process, transport                                                                                                                                                                                                                                                                                                     |
| nucleoside-diphosphate kinase 1                                                            | Nme1      | NP_032730    | 17       | 3             | cytoplasm, microsome, nucleus, soluble fraction                        | ATP binding, kinase activity, magnesium ion binding, metal ion binding, nucleoside diphosphate kinase activity, nucleotide binding, transferase activity    | cell differentiation, CTP biosynthetic process, endocytosis, GTP biosynthetic process, lactation, mammary gland development, nervous system development, nucleotide metabolic process, UTP biosynthetic process                                                                                                                                                     |
| nucleobindin 1                                                                             | Nucb1     | NP_032775    | 53       | 3             | cytoplasm, Golgi apparatus, membrane                                   | calcium ion binding, DNA binding                                                                                                                            | not classified                                                                                                                                                                                                                                                                                                                                                      |
| palmitoyl-protein thioesterase 1                                                           | Ppt1      | NP_032943    | 34       | 3             | axon, cell soma, dendrite, extracellular space, lysosome               | hydrolase activity, palmitoyl-(protein) hydrolase activity                                                                                                  | adult locomotory behavior, associative learning, cellular macromolecule catabolic process, cellular protein catabolic process, grooming behavior, lysosome organization, neurotransmitter secretion, pinocytosis, protein depalmitoylation, protein modification process, receptor-mediated endocytosis, regulation of phospholipase A2 activity, visual perception |
| aminopeptidase puromycin sensitive                                                         | Npepps    | NP_032968    | 103      | 3             | cytoplasm, nucleus                                                     | aminopeptidase activity, hydrolase activity, metal ion binding, metalloproteinase activity, peptidase activity, zinc ion binding                            | proteolysis                                                                                                                                                                                                                                                                                                                                                         |

| Protein Name                                          | Gene Name | Accession No | Mw (kDa) | Peptide Count | GO Component                                                                                                     | GO Function                                                                                                                                                                                                             | GO Process                                                                                                                                                                                                                                                                                                                                                                                                     |
|-------------------------------------------------------|-----------|--------------|----------|---------------|------------------------------------------------------------------------------------------------------------------|-------------------------------------------------------------------------------------------------------------------------------------------------------------------------------------------------------------------------|----------------------------------------------------------------------------------------------------------------------------------------------------------------------------------------------------------------------------------------------------------------------------------------------------------------------------------------------------------------------------------------------------------------|
| proteasome (prosome, macropain) subunit, alpha type 2 | Psma2     | NP_032970    | 26       | 3             | cytoplasm, nucleus, proteasome complex, proteasome core complex                                                  | endopeptidase activity, hydrolase activity, peptidase activity, threonine-type endopeptidase activity                                                                                                                   | proteolysis involved in cellular protein catabolic process, ubiquitin-dependent protein catabolic process                                                                                                                                                                                                                                                                                                      |
| polymerase I and transcript release factor            | Ptrf      | NP_033012    | 44       | 3             | caveola, cytoplasm, endoplasmic reticulum, membrane, microsome, mitochondrion, nucleus, plasma membrane          | protein binding, RNA binding, RNA polymerase I transcription termination factor activity, rRNA binding, rRNA primary transcript binding                                                                                 | regulation of transcription, transcription, transcription initiation from RNA polymerase I promoter, transcription termination                                                                                                                                                                                                                                                                                 |
| Rho-associated coiled-coil forming kinase 1           | Rock1     | NP_033097    | 158      | 3             | cytoplasm, Golgi apparatus, intracellular, membrane                                                              | ATP binding, diacylglycerol binding, kinase activity, metal ion binding, nucleotide binding, protein binding, protein kinase activity, protein serine/threonine kinase activity, transferase activity, zinc ion binding | actin cytoskeleton organization, apoptosis, bleb formation, cytokinesis, intracellular signaling cascade, negative regulation of neuron apoptosis, protein amino acid phosphorylation, Rho protein signal transduction, signal transduction                                                                                                                                                                    |
| ribosomal protein S5                                  | Rps5      | NP_033121    | 23       | 3             | intracellular, ribonucleoprotein complex, ribosome, small ribosomal subunit                                      | structural constituent of ribosome                                                                                                                                                                                      | translation                                                                                                                                                                                                                                                                                                                                                                                                    |
| ribosomal protein S6                                  | Rps6      | NP_033122    | 29       | 3             | cytoplasm, intracellular, perinuclear region of cytoplasm, polysome, ribonucleoprotein complex, ribosome         | structural constituent of ribosome                                                                                                                                                                                      | activation-induced cell death of T cells, erythrocyte development, G1/S transition checkpoint, G1/S transition of mitotic cell cycle, gastrulation, glucose homeostasis, mitosis, negative regulation of apoptosis, oogenesis stage, placenta development, ribosomal small subunit biogenesis, rRNA processing, T cell differentiation in the thymus, T cell proliferation during immune response, translation |
| solute carrier family 3, member 1                     | Slc3a1    | NP_033231    | 78       | 3             | mitochondrial inner membrane                                                                                     | not classified                                                                                                                                                                                                          | not classified                                                                                                                                                                                                                                                                                                                                                                                                 |
| signal sequence receptor, delta                       | Ssr4      | NP_033305    | 19       | 3             | endoplasmic reticulum, integral to membrane, membrane                                                            | receptor activity                                                                                                                                                                                                       | not classified                                                                                                                                                                                                                                                                                                                                                                                                 |
| syntaxin 4A (placental)                               | Stx4a     | NP_033320    | 34       | 3             | cytoplasm, integral to membrane, membrane, perinuclear region of cytoplasm, plasma membrane, trans-Golgi network | protein binding, SNAP receptor activity                                                                                                                                                                                 | intracellular protein transport, neurotransmitter transport, synaptic vesicle exocytosis, transport                                                                                                                                                                                                                                                                                                            |
| tripeptidyl peptidase II                              | Tpp2      | NP_033444    | 140      | 3             | cytoplasm                                                                                                        | aminopeptidase activity, hydrolase activity, peptidase activity, serine-type endopeptidase activity, serine-type peptidase activity                                                                                     | proteolysis                                                                                                                                                                                                                                                                                                                                                                                                    |
| ribosomal protein L13a                                | Rpl13a    | NP_033464    | 23       | 3             | intracellular, large ribosomal subunit, ribonucleoprotein complex, ribosome                                      | molecular_function, structural constituent of ribosome                                                                                                                                                                  | biological_process, translation                                                                                                                                                                                                                                                                                                                                                                                |
| adaptor protein complex AP-1, mu 2 subunit isoform 2  | Ap1m2     | NP_033808    | 48       | 3             | clathrin adaptor complex, cytoplasmic vesicle, Golgi apparatus, membrane, trans-Golgi network                    | protein binding                                                                                                                                                                                                         | intracellular protein transport, protein transport, transport, vesicle-mediated transport                                                                                                                                                                                                                                                                                                                      |

| Protein Name                                            | Gene Name | Accession No | Mw (kDa) | Peptide Count | GO Component                                                                | GO Function                                                                                                                                                                                                                                                                                                                         | GO Process                                                                                                                                                                                                                                                                                                                                                                            |
|---------------------------------------------------------|-----------|--------------|----------|---------------|-----------------------------------------------------------------------------|-------------------------------------------------------------------------------------------------------------------------------------------------------------------------------------------------------------------------------------------------------------------------------------------------------------------------------------|---------------------------------------------------------------------------------------------------------------------------------------------------------------------------------------------------------------------------------------------------------------------------------------------------------------------------------------------------------------------------------------|
| calpain 2                                               | Capn2     | NP_033924    | 80       | 3             | cytoplasm, intracellular, membrane, plasma membrane                         | calcium ion binding, calcium-dependent cysteine-type endopeptidase activity, cysteine-type endopeptidase activity, cysteine-type peptidase activity, hydrolase activity, peptidase activity                                                                                                                                         | blastocyst development, myoblast fusion, proteolysis                                                                                                                                                                                                                                                                                                                                  |
| cell division cycle 10 homolog                          | Sept7     | NP_033989    | 51       | 3             | cytoplasm, septin complex, synaptosome                                      | GTP binding, nucleotide binding, protein binding                                                                                                                                                                                                                                                                                    | cell cycle, cell division, mitosis                                                                                                                                                                                                                                                                                                                                                    |
| COP9 (constitutive photomorphogenic) homolog, subunit 2 | Cops2     | NP_034069    | 52       | 3             | cytoplasm, nucleus, signalosome                                             | protein binding, transcription corepressor activity                                                                                                                                                                                                                                                                                 | cell proliferation, negative regulation of transcription                                                                                                                                                                                                                                                                                                                              |
| carnitine palmitoyltransferase 1b, muscle               | Cpt1b     | NP_034078    | 88       | 3             | integral to membrane, membrane, mitochondrial outer membrane, mitochondrion | acyltransferase activity, carnitine O-palmitoyltransferase activity, kinase activity, transferase activity                                                                                                                                                                                                                          | fatty acid metabolic process, lipid metabolic process, long-chain fatty acid transport, transport                                                                                                                                                                                                                                                                                     |
| epoxide hydrolase 1, microsomal                         | Ephx1     | NP_034275    | 53       | 3             | endoplasmic reticulum, integral to membrane, membrane, microsome            | catalytic activity, cis-stilbene-oxide hydrolase activity, epoxide hydrolase activity, hydrolase activity                                                                                                                                                                                                                           | aromatic compound catabolic process, cellular aromatic compound metabolic process, response to organic cyclic substance, response to toxin                                                                                                                                                                                                                                            |
| glycerol-3-phosphate dehydrogenase 1 (soluble)          | Gpd1      | NP_034401    | 38       | 3             | cytoplasm, glycerol-3-phosphate dehydrogenase complex                       | binding, catalytic activity, coenzyme binding, glycerol-3-phosphate dehydrogenase (NAD+) activity, NAD or NADH binding, oxidoreductase activity, oxidoreductase activity, acting on CH-OH group of donors, oxidoreductase activity, acting on the CH-OH group of donors, NAD or NADP as acceptor, protein homodimerization activity | carbohydrate metabolic process, gluconeogenesis, glycerol-3-phosphate catabolic process, glycerol-3-phosphate metabolic process, metabolic process, oxidation reduction                                                                                                                                                                                                               |
| guanosine diphosphate (GDP) dissociation inhibitor 1    | Gdi1      | NP_034403    | 51       | 3             | cytoplasm                                                                   | GTPase activator activity, Rab GDP-dissociation inhibitor activity                                                                                                                                                                                                                                                                  | protein transport, regulation of GTPase activity                                                                                                                                                                                                                                                                                                                                      |
| guanine nucleotide binding protein, alpha 11            | Gna11     | NP_034431    | 42       | 3             | heterotrimeric G-protein complex                                            | GTP binding, GTPase activity, guanyl nucleotide binding, nucleotide binding, signal transducer activity                                                                                                                                                                                                                             | activation of phospholipase C activity by dopamine receptor signaling pathway, glutamate signaling pathway, G-protein coupled receptor protein signaling pathway, heart development, pigmentation during development, protein amino acid ADP-ribosylation, regulation of action potential, regulation of melanocyte differentiation, signal transduction, skeletal system development |
| glutathione S-transferase omega 1                       | Gsto1     | NP_034492    | 27       | 3             | cytoplasm                                                                   | glutathione transferase activity, transferase activity                                                                                                                                                                                                                                                                              | metabolic process                                                                                                                                                                                                                                                                                                                                                                     |

| Protein Name                                          | Gene Name | Accession No | Mw (kDa) | Peptide Count | GO Component                                                                                                                                                                            | GO Function                                                                                                                                                                                                                                                                     | GO Process                                                                                                                                                                                                                                                                                                                                                                                                                        |
|-------------------------------------------------------|-----------|--------------|----------|---------------|-----------------------------------------------------------------------------------------------------------------------------------------------------------------------------------------|---------------------------------------------------------------------------------------------------------------------------------------------------------------------------------------------------------------------------------------------------------------------------------|-----------------------------------------------------------------------------------------------------------------------------------------------------------------------------------------------------------------------------------------------------------------------------------------------------------------------------------------------------------------------------------------------------------------------------------|
| lysosomal membrane glycoprotein 2 isoform 2           | Lamp2     | NP_034815    | 46       | 3             | endosome, integral to membrane, late endosome, lysosomal membrane, lysosome, membrane, membrane fraction, phagocytic vesicle membrane, plasma membrane, platelet dense granule membrane | not classified                                                                                                                                                                                                                                                                  | not classified                                                                                                                                                                                                                                                                                                                                                                                                                    |
| protein phosphatase 5, catalytic subunit              | Ppp5c     | NP_035285    | 57       | 3             | cytoplasm, cytosol, nucleus                                                                                                                                                             | binding, hydrolase activity, iron ion binding, manganese ion binding, metal ion binding, phosphoprotein phosphatase activity, protein binding, protein serine/threonine phosphatase activity                                                                                    | protein amino acid dephosphorylation, response to morphine                                                                                                                                                                                                                                                                                                                                                                        |
| prolyl endopeptidase                                  | Prep      | NP_035286    | 81       | 3             | cytoplasm, nucleus                                                                                                                                                                      | hydrolase activity, peptidase activity, serine-type endopeptidase activity, serine-type peptidase activity                                                                                                                                                                      | protein metabolic process, proteolysis                                                                                                                                                                                                                                                                                                                                                                                            |
| proteasome (prosome, macropain) 26S subunit, ATPase 2 | Psmc2     | NP_035318    | 53       | 3             | cytoplasm, nucleus, proteasome complex                                                                                                                                                  | ATP binding, hydrolase activity, nucleoside-triphosphatase activity, nucleotide binding, protein binding                                                                                                                                                                        | protein catabolic process                                                                                                                                                                                                                                                                                                                                                                                                         |
| sterol carrier protein 2, liver                       | Scp2      | NP_035457    | 59       | 3             | cytoplasm, mitochondrion, peroxisome                                                                                                                                                    | catalytic activity, lipid binding, oxidoreductase activity, propanoyl-CoA C-acyltransferase activity, protein binding, sterol carrier activity, sterol carrier protein X-related thiolase activity, transferase activity, transferring acyl groups other than amino-acyl groups | acyl-CoA metabolic process, lipid transport, metabolic process, peroxisome organization, transport                                                                                                                                                                                                                                                                                                                                |
| sepiapterin reductase                                 | Spr       | NP_035597    | 28       | 3             | cytoplasm                                                                                                                                                                               | binding, catalytic activity, oxidoreductase activity, sepiapterin reductase activity                                                                                                                                                                                            | cell morphogenesis involved in neuron differentiation, death, dopamine metabolic process, L-phenylalanine metabolic process, metabolic process, norepinephrine metabolic process, oxidation reduction, pteridine metabolic process, regulation of multicellular organism growth, serotonin metabolic process, tetrahydrobiopterin biosynthetic process, tetrahydrobiopterin metabolic process, voluntary musculoskeletal movement |
| surfeit gene 4                                        | Surf4     | NP_035642    | 30       | 3             | endoplasmic reticulum, integral to membrane, membrane                                                                                                                                   | not classified                                                                                                                                                                                                                                                                  | not classified                                                                                                                                                                                                                                                                                                                                                                                                                    |
| vimentin                                              | Vim       | NP_035831    | 54       | 3             | cell leading edge, cytoplasm, cytoskeleton, intermediate filament, type III intermediate filament                                                                                       | protein binding, structural molecule activity                                                                                                                                                                                                                                   | intermediate filament-based process                                                                                                                                                                                                                                                                                                                                                                                               |
| coronin, actin binding protein 1B                     | Coro1b    | NP_035908    | 54       | 3             | cellular_component, cytoplasm, cytoskeleton                                                                                                                                             | actin binding, protein binding                                                                                                                                                                                                                                                  | biological_process                                                                                                                                                                                                                                                                                                                                                                                                                |

| Protein Name                                                               | Gene Name | Accession No | Mw (kDa) | Peptide Count | GO Component                                                                                                                            | GO Function                                                                                                                                                                                    | GO Process                                                                                                                                                                                                                                                                                                                                                                                                                                                          |
|----------------------------------------------------------------------------|-----------|--------------|----------|---------------|-----------------------------------------------------------------------------------------------------------------------------------------|------------------------------------------------------------------------------------------------------------------------------------------------------------------------------------------------|---------------------------------------------------------------------------------------------------------------------------------------------------------------------------------------------------------------------------------------------------------------------------------------------------------------------------------------------------------------------------------------------------------------------------------------------------------------------|
| COP9 (constitutive photomorphogenic), subunit 3                            | Cops3     | NP_036121    | 48       | 3             | cytoplasm, nucleus, signalosome                                                                                                         | protein binding                                                                                                                                                                                | in utero embryonic development                                                                                                                                                                                                                                                                                                                                                                                                                                      |
| solute carrier family 9 (sodium/hydrogen exchanger), isoform 3 regulator 1 | Slc9a3r1  | NP_036160    | 39       | 3             | apical part of cell, apical plasma membrane, membrane                                                                                   | protein binding                                                                                                                                                                                | cAMP-mediated signaling, cellular phosphate ion homeostasis, Wnt receptor signaling pathway                                                                                                                                                                                                                                                                                                                                                                         |
| B-cell receptor-associated protein 31                                      | Bcap31    | NP_036190    | 28       | 3             | endoplasmic reticulum, Golgi membrane, integral to membrane, membrane, plasma membrane                                                  | receptor activity                                                                                                                                                                              | apoptosis, immune response, intracellular protein transport, protein transport, spermatogenesis, transport, vesicle-mediated transport                                                                                                                                                                                                                                                                                                                              |
| ATPase, H <sup>+</sup> transporting, V0 subunit D isoform 1                | Atp6v0d1  | NP_038505    | 40       | 3             | early endosome, proton-transporting two-sector ATPase complex, proton-transporting domain, proton-transporting V-type ATPase, V0 domain | hydrogen ion transmembrane transporter activity, hydrogen-exporting ATPase activity, phosphorylative mechanism                                                                                 | ATP synthesis coupled proton transport, ion transport, proton transport, transport                                                                                                                                                                                                                                                                                                                                                                                  |
| heme binding protein 1                                                     | Hebp1     | NP_038574    | 21       | 3             | cytoplasm, cytosol, mitochondrion                                                                                                       | heme binding                                                                                                                                                                                   | heme metabolic process                                                                                                                                                                                                                                                                                                                                                                                                                                              |
| hypoxanthine guanine phosphoribosyl transferase 1                          | Hprt1     | NP_038584    | 25       | 3             | cytoplasm                                                                                                                               | hypoxanthine phosphoribosyltransferase activity, identical protein binding, magnesium ion binding, metal ion binding, transferase activity, transferase activity, transferring glycosyl groups | adenine metabolic process, adenine salvage, behavior, central nervous system neuron development, cerebral cortex neuron differentiation, cytolysis, dendrite morphogenesis, dopamine metabolic process, grooming behavior, guanine salvage, hypoxanthine metabolic process, lymphocyte proliferation, nucleoside metabolic process, positive regulation of dopamine metabolic process, purine ribonucleoside salvage, response to amphetamine, striatum development |

| Protein Name                                             | Gene Name | Accession No | Mw (kDa) | Peptide Count | GO Component                                                                           | GO Function                                                                                                                                                                                                                                                                                                                                                         | GO Process                                                                                                                                                                                                                                                                                                                                                                                                                                                                                                                                                                                                                                                    |
|----------------------------------------------------------|-----------|--------------|----------|---------------|----------------------------------------------------------------------------------------|---------------------------------------------------------------------------------------------------------------------------------------------------------------------------------------------------------------------------------------------------------------------------------------------------------------------------------------------------------------------|---------------------------------------------------------------------------------------------------------------------------------------------------------------------------------------------------------------------------------------------------------------------------------------------------------------------------------------------------------------------------------------------------------------------------------------------------------------------------------------------------------------------------------------------------------------------------------------------------------------------------------------------------------------|
| purine-nucleoside phosphorylase 1                        | Pnp1      | NP_038660    | 32       | 3             | cytosol                                                                                | catalytic activity, purine-nucleoside phosphorylase activity, transferase activity, transferring glycosyl groups, transferase activity, transferring pentosyl groups                                                                                                                                                                                                | deoxyguanosine catabolic process, deoxyinosine catabolic process, dGTP metabolic process, GTP biosynthetic process, guanosine catabolic process, inosine catabolic process, negative regulation of apoptosis, nucleobase, nucleoside, nucleotide and nucleic acid metabolic process, nucleoside metabolic process, positive regulation of alpha-beta T cell differentiation, positive regulation of B cell differentiation, positive regulation of DNA repair, positive regulation of T cell mediated cytotoxicity, positive regulation of T cell proliferation, purine nucleoside metabolic process, response to gamma radiation, urate biosynthetic process |
| splicing factor, arginine/serine-rich 3 (SRp20)          | Sfrs3     | NP_038691    | 19       | 3             | nucleus                                                                                | nucleic acid binding, nucleotide binding, RNA binding                                                                                                                                                                                                                                                                                                               | mRNA processing, RNA splicing                                                                                                                                                                                                                                                                                                                                                                                                                                                                                                                                                                                                                                 |
| ras-GTPase-activating protein SH3-domain binding protein | G3bp1     | NP_038744    | 52       | 3             | cytoplasm, intracellular, membrane, nucleus, plasma membrane                           | ATP binding, DNA binding, endonuclease activity, helicase activity, hydrolase activity, nuclease activity, nucleic acid binding, nucleotide binding, RNA binding                                                                                                                                                                                                    | transport                                                                                                                                                                                                                                                                                                                                                                                                                                                                                                                                                                                                                                                     |
| nucleosome binding protein 1                             | Nsbp1     | NP_057919    | 45       | 3             | chromatin, nucleoplasm, nucleus                                                        | chromatin binding, DNA binding                                                                                                                                                                                                                                                                                                                                      | regulation of transcription, regulation of transcription from RNA polymerase I promoter, transcription                                                                                                                                                                                                                                                                                                                                                                                                                                                                                                                                                        |
| ubiquitin carboxyl-terminal esterase L3                  | Uchl3     | NP_057932    | 26       | 3             | cytoplasm, intracellular                                                               | cysteine-type peptidase activity, hydrolase activity, peptidase activity, ubiquitin thiolesterase activity                                                                                                                                                                                                                                                          | adult walking behavior, eating behavior, modification-dependent protein catabolic process, protein deubiquitination, ubiquitin-dependent protein catabolic process                                                                                                                                                                                                                                                                                                                                                                                                                                                                                            |
| ATPase, Ca <sup>++</sup> transporting, ubiquitous        | Atp2a3    | NP_058025    | 114      | 3             | endoplasmic reticulum, integral to membrane, membrane, nucleus, sarcoplasmic reticulum | ATP binding, ATPase activity, coupled to transmembrane movement of ions, phosphorylative mechanism, calcium ion binding, calcium-transporting ATPase activity, catalytic activity, hydrolase activity, hydrolase activity, acting on acid anhydrides, catalyzing transmembrane movement of substances, magnesium ion binding, metal ion binding, nucleotide binding | ATP biosynthetic process, calcium ion transport, cation transport, ion transport, metabolic process, transport                                                                                                                                                                                                                                                                                                                                                                                                                                                                                                                                                |

| Protein Name                                             | Gene Name | Accession No | Mw (kDa) | Peptide Count | GO Component                                                                                                                            | GO Function                                                                                                                                                                                                                                                                 | GO Process                                                                                                                                                                                                                                |
|----------------------------------------------------------|-----------|--------------|----------|---------------|-----------------------------------------------------------------------------------------------------------------------------------------|-----------------------------------------------------------------------------------------------------------------------------------------------------------------------------------------------------------------------------------------------------------------------------|-------------------------------------------------------------------------------------------------------------------------------------------------------------------------------------------------------------------------------------------|
| caveolin 2                                               | Cav2      | NP_058596    | 18       | 3             | caveola, Golgi apparatus, integral to membrane, integral to plasma membrane, membrane, perinuclear region of cytoplasm, plasma membrane | protein homodimerization activity                                                                                                                                                                                                                                           | endocytosis, endoplasmic reticulum organization, mitochondrion organization, negative regulation of cell proliferation, negative regulation of endothelial cell proliferation, protein oligomerization, skeletal muscle fiber development |
| inositol (myo)-1(or 4)-monophosphatase 1                 | Impa1     | NP_061352    | 30       | 3             | cellular_component, cytoplasm                                                                                                           | hydrolase activity, inositol or phosphatidylinositol phosphatase activity, inositol-1(or 4)-monophosphatase activity, lithium ion binding, magnesium ion binding, metal ion binding                                                                                         | inositol metabolic process                                                                                                                                                                                                                |
| protein phosphatase 2a, catalytic subunit, alpha isoform | Ppp2ca    | NP_062284    | 36       | 3             | chromosome, centromeric region, cytoplasm, cytosol, nucleus, plasma membrane, protein phosphatase type 2A complex                       | hydrolase activity, iron ion binding, manganese ion binding, metal ion binding, phosphoprotein phosphatase activity, protein binding, protein serine/threonine phosphatase activity                                                                                         | mesoderm development, protein amino acid dephosphorylation, regulation of cell cycle                                                                                                                                                      |
| RNA and export factor binding protein 2                  | Refbp2    | NP_062357    | 24       | 3             | cytoplasm, nucleus, spliceosomal complex                                                                                                | nucleic acid binding, nucleotide binding, RNA binding, single-stranded DNA binding                                                                                                                                                                                          | mRNA processing, mRNA transport, RNA splicing, transport                                                                                                                                                                                  |
| NS1-associated protein 1 isoform 1                       | Syncrip   | NP_062640    | 70       | 3             | cytoplasm, nucleus, ribonucleoprotein complex, spliceosomal complex                                                                     | nucleic acid binding, poly(A) RNA binding, RNA binding                                                                                                                                                                                                                      | mRNA processing, RNA splicing                                                                                                                                                                                                             |
| actin-like 6A                                            | Actl6a    | NP_062647    | 47       | 3             | chromatin remodeling complex, nucleus                                                                                                   | ATP binding, chromatin binding, protein binding                                                                                                                                                                                                                             | chromatin modification, chromatin remodeling, regulation of growth, regulation of transcription, transcription                                                                                                                            |
| thioredoxin 2                                            | Txn2      | NP_064297    | 18       | 3             | mitochondrion                                                                                                                           | electron carrier activity, protein disulfide oxidoreductase activity                                                                                                                                                                                                        | cell redox homeostasis, electron transport chain, glycerol ether metabolic process, transport                                                                                                                                             |
| inositol 1,4,5-triphosphate receptor 2 isoform 1         | Itpr2     | NP_064307    | 307      | 3             | cell cortex, cytoplasm, endoplasmic reticulum, integral to membrane, membrane, microsome, sarcoplasmic reticulum                        | calcium channel activity, calcium ion binding, calcium-release channel activity, inositol 1,4,5-trisphosphate-sensitive calcium-release channel activity, inositol-1,4,5-trisphosphate receptor activity, ion channel activity, phosphoinositide binding, receptor activity | calcium ion transport, ion transport, transport                                                                                                                                                                                           |
| Sec11-like 1                                             | Sec11a    | NP_064335    | 21       | 3             | endoplasmic reticulum, integral to membrane, membrane, microsome                                                                        | hydrolase activity, peptidase activity, serine-type peptidase activity                                                                                                                                                                                                      | proteolysis, signal peptide processing                                                                                                                                                                                                    |
| carnitine/acylcarnitine translocase                      | Slc25a20  | NP_065266    | 33       | 3             | integral to membrane, membrane, mitochondrial inner membrane, mitochondrion                                                             | binding, transporter activity                                                                                                                                                                                                                                               | transport                                                                                                                                                                                                                                 |



| Protein Name                                                                                                 | Gene Name | Accession No | Mw (kDa) | Peptide Count | GO Component                                                                                                                                                                                                                                              | GO Function                                                                                                                                                                                                         | GO Process                                                                                                                                                                                |
|--------------------------------------------------------------------------------------------------------------|-----------|--------------|----------|---------------|-----------------------------------------------------------------------------------------------------------------------------------------------------------------------------------------------------------------------------------------------------------|---------------------------------------------------------------------------------------------------------------------------------------------------------------------------------------------------------------------|-------------------------------------------------------------------------------------------------------------------------------------------------------------------------------------------|
| EH-domain containing 3                                                                                       | Ehd3      | NP_065603    | 61       | 3             | endocytic vesicle, endosome, membrane, plasma membrane                                                                                                                                                                                                    | ATP binding, calcium ion binding, GTP binding, GTPase activity, nucleotide binding, protein binding                                                                                                                 | not classified                                                                                                                                                                            |
| flightless I homolog                                                                                         | Flii      | NP_071292    | 145      | 3             | cytoplasm, cytoskeleton, nucleus                                                                                                                                                                                                                          | actin binding, protein binding                                                                                                                                                                                      | actin cytoskeleton organization, actin filament severing, multicellular organismal development, regulation of transcription, transcription                                                |
| OClA domain containing 1                                                                                     | Ociad1    | NP_075918    | 28       | 3             | cellular_component, endosome                                                                                                                                                                                                                              | molecular_function                                                                                                                                                                                                  | biological_process                                                                                                                                                                        |
| pterin 4 alpha carbinolamine dehydratase/dimerization cofactor of hepatocyte nuclear factor 1 alpha (TCF1) 1 | Pcbd1     | NP_079549    | 12       | 3             | cytoplasm, nucleus                                                                                                                                                                                                                                        | 4-alpha-hydroxytetrahydrobiopterin dehydratase activity, lyase activity, phenylalanine 4-monooxygenase activity, protein binding, transcription coactivator activity                                                | positive regulation of transcription, protein heterooligomerization, protein homotrimerization, regulation of protein homodimerization activity, tetrahydrobiopterin biosynthetic process |
| guanine nucleotide binding protein (G protein), gamma 12                                                     | Gng12     | NP_079554    | 8        | 3             | heterotrimeric G-protein complex, membrane, plasma membrane                                                                                                                                                                                               | signal transducer activity                                                                                                                                                                                          | G-protein coupled receptor protein signaling pathway, signal transduction                                                                                                                 |
| mitochondrial ribosomal protein S7                                                                           | Mrps7     | NP_079581    | 28       | 3             | intracellular, mitochondrial small ribosomal subunit, mitochondrion, ribonucleoprotein complex, ribosome                                                                                                                                                  | structural constituent of ribosome                                                                                                                                                                                  | translation                                                                                                                                                                               |
| NADH-ubiquinone oxidoreductase B9 subunit                                                                    | Ndufa3    | NP_079624    | 9        | 3             | integral to membrane, membrane, mitochondrial inner membrane, mitochondrion, respiratory chain                                                                                                                                                            | not classified                                                                                                                                                                                                      | electron transport chain, transport                                                                                                                                                       |
| Ts translation elongation factor, mitochondrial                                                              | Tsfm      | NP_079813    | 35       | 3             | intracellular, mitochondrion                                                                                                                                                                                                                              | translation elongation factor activity                                                                                                                                                                              | translation, translational elongation                                                                                                                                                     |
| mitochondrial ribosomal protein S25                                                                          | Mrps25    | NP_079854    | 20       | 3             | mitochondrial small ribosomal subunit, mitochondrion, ribonucleoprotein complex, ribosome                                                                                                                                                                 | structural constituent of ribosome                                                                                                                                                                                  | not classified                                                                                                                                                                            |
| ankyrin repeat and SOCS box-containing 17                                                                    | Asb17     | NP_080034    | 34       | 3             | not classified                                                                                                                                                                                                                                            | not classified                                                                                                                                                                                                      | intracellular signaling cascade, modification-dependent protein catabolic process                                                                                                         |
| prenylcysteine oxidase 1                                                                                     | Pcyox1    | NP_080099    | 56       | 3             | lysosome                                                                                                                                                                                                                                                  | oxidoreductase activity, oxidoreductase activity, acting on sulfur group of donors, oxygen as acceptor, prenylcysteine oxidase activity                                                                             | oxidation reduction, prenylcysteine catabolic process                                                                                                                                     |
| thioredoxin-related transmembrane protein 2                                                                  | Txndc14   | NP_080144    | 34       | 3             | integral to membrane, membrane                                                                                                                                                                                                                            | not classified                                                                                                                                                                                                      | cell redox homeostasis                                                                                                                                                                    |
| RAB5A, member RAS oncogene family                                                                            | Rab5a     | NP_080163    | 24       | 3             | early endosome, endocytic vesicle, endosome, membrane, membrane raft, plasma membrane, ruffle                                                                                                                                                             | GTP binding, GTPase activity, guanyl nucleotide binding, nucleotide binding                                                                                                                                         | endocytosis, protein transport, small GTPase mediated signal transduction, transport                                                                                                      |
| ATP synthase, H <sup>+</sup> transporting, mitochondrial F1 complex, epsilon subunit                         | Atp5e     | NP_080259    | 6        | 3             | membrane, mitochondrial inner membrane, mitochondrial proton-transporting ATP synthase complex, mitochondrial proton-transporting ATP synthase complex, catalytic core F(1), mitochondrion, proton-transporting ATP synthase complex, catalytic core F(1) | hydrogen ion transporting ATP synthase activity, rotational mechanism, hydrogen-exporting ATPase activity, phosphorylative mechanism, hydrolase activity, proton-transporting ATPase activity, rotational mechanism | ATP biosynthetic process, ATP synthesis coupled proton transport, ion transport, proton transport, transport                                                                              |

| Protein Name                                              | Gene Name      | Accession No | Mw (kDa) | Peptide Count | GO Component                                                                | GO Function                                                                                                                                                                                                                                                                                                                                    | GO Process                                                                                           |
|-----------------------------------------------------------|----------------|--------------|----------|---------------|-----------------------------------------------------------------------------|------------------------------------------------------------------------------------------------------------------------------------------------------------------------------------------------------------------------------------------------------------------------------------------------------------------------------------------------|------------------------------------------------------------------------------------------------------|
| myosin light chain, regulatory B-like                     | 2900073G15 Rik | NP_080340    | 20       | 3             | not classified                                                              | calcium ion binding                                                                                                                                                                                                                                                                                                                            | not classified                                                                                       |
| coenzyme Q5 homolog, methyltransferase                    | Coq5           | NP_080780    | 37       | 3             | mitochondrion                                                               | methyltransferase activity, transferase activity                                                                                                                                                                                                                                                                                               | ubiquinone biosynthetic process                                                                      |
| parathymosin                                              | Ptms           | NP_081264    | 11       | 3             | not classified                                                              | not classified                                                                                                                                                                                                                                                                                                                                 | immune response                                                                                      |
| keratin 5                                                 | Krt5           | NP_081287    | 62       | 3             | intermediate filament, keratin filament                                     | protein binding, structural molecule activity                                                                                                                                                                                                                                                                                                  | not classified                                                                                       |
| 6.8 kDa mitochondrial proteolipid                         | 2010107E04 Rik | NP_081636    | 7        | 3             | mitochondrion                                                               | not classified                                                                                                                                                                                                                                                                                                                                 | not classified                                                                                       |
| hypothetical protein LOC70564                             | 5730469M10 Rik | NP_081740    | 24       | 3             | extracellular region                                                        | not classified                                                                                                                                                                                                                                                                                                                                 | not classified                                                                                       |
| 3-oxoacyl-ACP synthase, mitochondrial                     | Oxsm           | NP_081971    | 49       | 3             | mitochondrion                                                               | 3-oxoacyl-[acyl-carrier-protein] synthase activity, acyltransferase activity, catalytic activity, transferase activity, transferase activity, transferring acyl groups other than amino-acyl groups                                                                                                                                            | biosynthetic process, fatty acid biosynthetic process, lipid biosynthetic process, metabolic process |
| protein phosphatase 1, regulatory (inhibitor) subunit 12A | Ppp1r12a       | NP_082168    | 112      | 3             | cytoplasm                                                                   | phosphoprotein phosphatase activity                                                                                                                                                                                                                                                                                                            | protein amino acid dephosphorylation, regulation of nucleocytoplasmic transport                      |
| RAN binding protein 3                                     | Ranbp3         | NP_082209    | 53       | 3             | cytoplasm, nucleus                                                          | not classified                                                                                                                                                                                                                                                                                                                                 | intracellular transport, protein transport, transport                                                |
| solute carrier family 25, member 35                       | Slc25a35       | NP_082324    | 33       | 3             | integral to membrane, membrane, mitochondrial inner membrane, mitochondrion | not classified                                                                                                                                                                                                                                                                                                                                 | transport                                                                                            |
| aarF domain containing kinase 1                           | Adck1          | NP_082381    | 60       | 3             | extracellular region                                                        | ATP binding, kinase activity, nucleotide binding, protein kinase activity, protein serine/threonine kinase activity, transferase activity                                                                                                                                                                                                      | protein amino acid phosphorylation                                                                   |
| cytochrome P450, family 2, subfamily s, polypeptide 1     | Cyp2s1         | NP_083051    | 56       | 3             | endoplasmic reticulum, membrane, microsome                                  | aromatase activity, electron carrier activity, heme binding, iron ion binding, metal ion binding, monooxygenase activity, oxidoreductase activity, oxidoreductase activity, acting on paired donors, with incorporation or reduction of molecular oxygen, reduced flavin or flavoprotein as one donor, and incorporation of one atom of oxygen | oxidation reduction                                                                                  |
| glucan (1,4-alpha-), branching enzyme 1                   | Gbe1           | NP_083079    | 80       | 3             | cellular_component                                                          | 1,4-alpha-glucan branching enzyme activity, catalytic activity, cation binding, hydrolase activity, hydrolyzing O-glycosyl compounds, transferase activity, transferase activity, transferring glycosyl groups                                                                                                                                 | carbohydrate metabolic process, glycogen biosynthetic process                                        |
| actin related protein 2/3 complex, subunit 5-like         | Arpc5l         | NP_083085    | 17       | 3             | cellular_component, cytoplasm, cytoskeleton                                 | actin binding, molecular_function                                                                                                                                                                                                                                                                                                              | biological_process, regulation of actin filament polymerization                                      |

| Protein Name                                                     | Gene Name | Accession No | Mw (kDa) | Peptide Count | GO Component                                                                                     | GO Function                                                                                                                                                                                                                                                                  | GO Process                                                                                                                                                                            |
|------------------------------------------------------------------|-----------|--------------|----------|---------------|--------------------------------------------------------------------------------------------------|------------------------------------------------------------------------------------------------------------------------------------------------------------------------------------------------------------------------------------------------------------------------------|---------------------------------------------------------------------------------------------------------------------------------------------------------------------------------------|
| zinc finger transcription factor TRPS1                           | Trps1     | NP_114389    | 141      | 3             | intracellular, nucleus                                                                           | DNA binding, metal ion binding, protein binding, sequence-specific DNA binding, transcription factor activity, transcription repressor activity, zinc ion binding                                                                                                            | negative regulation of transcription, DNA-dependent, regulation of transcription, regulation of transcription, DNA-dependent, transcription                                           |
| spectrin beta 4                                                  | Spnb4     | NP_115999    | 289      | 3             | axon, axon hillock, cytoplasm, nuclear matrix, PML body, spectrin                                | actin binding, ankyrin binding                                                                                                                                                                                                                                               | adult behavior, adult walking behavior, axonogenesis, fertilization, positive regulation of multicellular organism growth, sensory perception of sound, transmission of nerve impulse |
| actinin alpha 2                                                  | Actn2     | NP_150371    | 104      | 3             | cytoplasm, striated muscle thin filament, Z disc                                                 | actin binding, actin filament binding, calcium ion binding, ligand-dependent nuclear receptor transcription coactivator activity, protein binding, protein binding, bridging, protein homodimerization activity, thyroid hormone receptor coactivator activity, ZASP binding | muscle contraction                                                                                                                                                                    |
| ribosomal protein 10                                             | Rpl10     | NP_443067    | 25       | 3             | cytoplasm, cytosolic large ribosomal subunit, intracellular, ribonucleoprotein complex, ribosome | structural constituent of ribosome                                                                                                                                                                                                                                           | translation                                                                                                                                                                           |
| major vault protein                                              | Mvp       | NP_542369    | 96       | 3             | cytoplasm, ribonucleoprotein complex                                                             | not classified                                                                                                                                                                                                                                                               | not classified                                                                                                                                                                        |
| solute carrier family 5 (sodium/glucose cotransporter), member 2 | Slc5a2    | NP_573517    | 73       | 3             | integral to membrane, membrane                                                                   | sodium ion binding, symporter activity, transporter activity                                                                                                                                                                                                                 | carbohydrate transport, ion transport, sodium ion transport, transport                                                                                                                |
| optic atrophy 1 homolog                                          | Opa1      | NP_598513    | 111      | 3             | integral to membrane, membrane, mitochondrial inner membrane, mitochondrion                      | GTP binding, nucleotide binding                                                                                                                                                                                                                                              | apoptosis, response to stimulus, visual perception                                                                                                                                    |
| calcium binding protein 39                                       | Cab39     | NP_598542    | 40       | 3             | cytoplasm                                                                                        | calcium ion binding                                                                                                                                                                                                                                                          | not classified                                                                                                                                                                        |
| prostaglandin E synthase 2                                       | Ptges2    | NP_598544    | 43       | 3             | cytoplasm, cytosol, Golgi apparatus, integral to membrane, membrane, nucleus                     | DNA binding, electron carrier activity, isomerase activity, prostaglandin-E synthase activity, protein disulfide oxidoreductase activity, transcription activator activity                                                                                                   | cell redox homeostasis, fatty acid biosynthetic process, lipid biosynthetic process, prostaglandin biosynthetic process, regulation of transcription, secretion                       |
| golgi autoantigen, golgin subfamily a, 2 isoform a               | Golga2    | NP_598613    | 116      | 3             | cis-Golgi network, Golgi apparatus, membrane                                                     | not classified                                                                                                                                                                                                                                                               | not classified                                                                                                                                                                        |
| oxidative-stress responsive 1                                    | Oxsr1     | NP_598746    | 52       | 3             | not classified                                                                                   | ATP binding, kinase activity, magnesium ion binding, metal ion binding, nucleotide binding, protein binding, protein kinase activity, protein serine/threonine kinase activity, transferase activity                                                                         | protein amino acid phosphorylation, response to oxidative stress                                                                                                                      |

| Protein Name                                                                       | Gene Name | Accession No | Mw (kDa) | Peptide Count | GO Component                                                       | GO Function                                                                                                                                                                                                                                                                                                                                                                                                                | GO Process                                                                                                                                                                                           |
|------------------------------------------------------------------------------------|-----------|--------------|----------|---------------|--------------------------------------------------------------------|----------------------------------------------------------------------------------------------------------------------------------------------------------------------------------------------------------------------------------------------------------------------------------------------------------------------------------------------------------------------------------------------------------------------------|------------------------------------------------------------------------------------------------------------------------------------------------------------------------------------------------------|
| ATP citrate lyase                                                                  | Acly      | NP_598798    | 120      | 3             | cytoplasm, intracellular                                           | ATP binding, ATP citrate synthase activity, binding, catalytic activity, lyase activity, magnesium ion binding, metal ion binding, nucleotide binding, protein binding, succinate-CoA ligase (ADP-forming) activity, transferase activity, transferase activity, transferring acyl groups, acyl groups converted into alkyl on transfer                                                                                    | acetyl-CoA biosynthetic process, cellular carbohydrate metabolic process, lipid biosynthetic process, metabolic process                                                                              |
| PDZ-domain protein scribble                                                        | Scrib     | NP_598850    | 180      | 3             | basolateral plasma membrane, cytoplasm, membrane                   | protein binding                                                                                                                                                                                                                                                                                                                                                                                                            | asymmetric protein localization, cell migration, mammary gland duct morphogenesis, morphogenesis of embryonic epithelium, positive chemotaxis                                                        |
| ATPase, H <sup>+</sup> /K <sup>+</sup> transporting, nongastric, alpha polypeptide | Atp12a    | NP_619593    | 115      | 3             | integral to membrane, membrane                                     | ATP binding, ATPase activity, coupled to transmembrane movement of ions, phosphorylative mechanism, catalytic activity, hydrogen:potassium-exchanging ATPase activity, hydrolase activity, acting on acid anhydrides, catalyzing transmembrane movement of substances, magnesium ion binding, metal ion binding, monovalent inorganic cation transmembrane transporter activity, nucleotide binding, potassium ion binding | ATP biosynthetic process, cation transport, ion transport, metabolic process, monovalent inorganic cation transport, potassium ion homeostasis, potassium ion transport, proton transport, transport |
| pre-mRNA processing factor 8                                                       | Prpf8     | NP_619600    | 274      | 3             | nucleus, ribonucleoprotein complex, spliceosomal complex, U5 snRNP | protein binding, RNA binding                                                                                                                                                                                                                                                                                                                                                                                               | mRNA processing, nuclear mRNA splicing, via spliceosome, RNA splicing                                                                                                                                |
| 3-mercaptopyruvate sulfurtransferase                                               | Mpst      | NP_619611    | 33       | 3             | cytoplasm, mitochondrial inner membrane, mitochondrion             | 3-mercaptopyruvate sulfurtransferase activity, thiosulfate sulfurtransferase activity, transferase activity                                                                                                                                                                                                                                                                                                                | sulfate transport                                                                                                                                                                                    |
| biliverdin reductase B (flavin reductase (NADPH))                                  | Blvrb     | NP_659172    | 22       | 3             | cytoplasm                                                          | biliverdin reductase activity, binding, catalytic activity, coenzyme binding, flavin reductase activity, oxidoreductase activity                                                                                                                                                                                                                                                                                           | cellular metabolic process, metabolic process, oxidation reduction                                                                                                                                   |
| dihydroxyacetone kinase 2 homolog                                                  | Dak       | NP_663471    | 60       | 3             | not classified                                                     | ATP binding, catalytic activity, cobalt ion binding, FAD-AMP lyase (cyclizing) activity, glycerone kinase activity, kinase activity, lyase activity, magnesium ion binding, manganese ion binding, metal ion binding, nucleotide binding, transferase activity                                                                                                                                                             | glycerol metabolic process                                                                                                                                                                           |

| Protein Name                                                | Gene Name      | Accession No | Mw (kDa) | Peptide Count | GO Component                                                                                                           | GO Function                                                                                                                                                                                                                                                                          | GO Process                                                                                                                                                      |
|-------------------------------------------------------------|----------------|--------------|----------|---------------|------------------------------------------------------------------------------------------------------------------------|--------------------------------------------------------------------------------------------------------------------------------------------------------------------------------------------------------------------------------------------------------------------------------------|-----------------------------------------------------------------------------------------------------------------------------------------------------------------|
| signal recognition particle 68                              | Srp68          | NP_666144    | 71       | 3             | cytoplasm, nucleolus, nucleus, ribonucleoprotein complex, signal recognition particle, endoplasmic reticulum targeting | RNA binding                                                                                                                                                                                                                                                                          | not classified                                                                                                                                                  |
| nardilysin, N-arginine dibasic convertase, NRD convertase 1 | Nrd1           | NP_666262    | 133      | 3             | not classified                                                                                                         | catalytic activity, hydrolase activity, metal ion binding, metalloendopeptidase activity, metallopeptidase activity, peptidase activity, protein binding, zinc ion binding                                                                                                           | proteolysis                                                                                                                                                     |
| thyroid hormone receptor associated protein 3               | Thrap3         | NP_666265    | 108      | 3             | mediator complex, nucleus                                                                                              | ATP binding, nucleotide binding, receptor activity, transcription coactivator activity                                                                                                                                                                                               | positive regulation of transcription from RNA polymerase II promoter, regulation of transcription, transcription, transcription from RNA polymerase II promoter |
| ER lipid raft associated 2                                  | Erin2          | NP_705820    | 38       | 3             | endoplasmic reticulum, integral to membrane, membrane                                                                  | not classified                                                                                                                                                                                                                                                                       | not classified                                                                                                                                                  |
| hypothetical protein LOC108654                              | 4933403F05 Rik | NP_722489    | 32       | 3             | integral to membrane, membrane                                                                                         | not classified                                                                                                                                                                                                                                                                       | not classified                                                                                                                                                  |
| ribosomal protein L32                                       | Rpl32          | NP_742083    | 16       | 3             | cytosolic large ribosomal subunit, intracellular, ribonucleoprotein complex, ribosome                                  | structural constituent of ribosome                                                                                                                                                                                                                                                   | translation                                                                                                                                                     |
| GRAM domain containing 1B                                   | Gramd1b        | NP_766356    | 101      | 3             | integral to membrane, membrane                                                                                         | not classified                                                                                                                                                                                                                                                                       | not classified                                                                                                                                                  |
| PDS5, regulator of cohesion maintenance, homolog B          | Pds5b          | NP_780519    | 164      | 3             | cellular_component, nucleus                                                                                            | DNA binding, molecular_function                                                                                                                                                                                                                                                      | cell cycle, cell division, mitosis, regulation of cell proliferation                                                                                            |
| glycerol-3-phosphate dehydrogenase 1-like                   | Gpd1l          | NP_780589    | 38       | 3             | cytoplasm, glycerol-3-phosphate dehydrogenase complex                                                                  | glycerol-3-phosphate dehydrogenase (NAD+) activity, NAD or NADH binding, oxidoreductase activity, oxidoreductase activity, acting on CH-OH group of donors, oxidoreductase activity, acting on the CH-OH group of donors, NAD or NADP as acceptor, protein homodimerization activity | carbohydrate metabolic process, glycerol-3-phosphate catabolic process, glycerol-3-phosphate metabolic process, oxidation reduction                             |
| potassium channel tetramerization domain containing 12      | Kctd12         | NP_808383    | 36       | 3             | membrane, voltage-gated potassium channel complex                                                                      | protein binding, voltage-gated potassium channel activity                                                                                                                                                                                                                            | potassium ion transport                                                                                                                                         |
| carbonic anhydrase 12                                       | Car12          | NP_848483    | 40       | 3             | integral to membrane, membrane                                                                                         | carbonate dehydratase activity, lyase activity, metal ion binding, zinc ion binding                                                                                                                                                                                                  | one-carbon metabolic process                                                                                                                                    |
| golgi-specific brefeldin A-resistance factor 1              | Gbf1           | NP_849261    | 207      | 3             | cellular_component                                                                                                     | molecular_function, protein binding                                                                                                                                                                                                                                                  | biological_process                                                                                                                                              |
| RAB18, member RAS oncogene family                           | Rab18          | NP_851415    | 23       | 3             | membrane, plasma membrane                                                                                              | GTP binding, nucleotide binding                                                                                                                                                                                                                                                      | protein transport, small GTPase mediated signal transduction, transport                                                                                         |
| arginyl-tRNA synthetase-like                                | Rars2          | NP_852071    | 65       | 3             | cytoplasm, mitochondrion                                                                                               | aminoacyl-tRNA ligase activity, arginine-tRNA ligase activity, ATP binding, ligase activity, nucleotide binding                                                                                                                                                                      | arginyl-tRNA aminoacylation, translation, tRNA aminoacylation for protein translation                                                                           |
| importin 7                                                  | Ipo7           | NP_852658    | 119      | 3             | cytoplasm, nucleus                                                                                                     | binding, histone binding, protein binding, protein transporter activity                                                                                                                                                                                                              | intracellular protein transport, protein import into nucleus, protein transport, transport                                                                      |

| Protein Name                                                                                                                                                                                                                                                 | Gene Name      | Accession No | Mw (kDa) | Peptide Count | GO Component                                                                       | GO Function                                                                                                                            | GO Process                                                                                                                                                                                               |
|--------------------------------------------------------------------------------------------------------------------------------------------------------------------------------------------------------------------------------------------------------------|----------------|--------------|----------|---------------|------------------------------------------------------------------------------------|----------------------------------------------------------------------------------------------------------------------------------------|----------------------------------------------------------------------------------------------------------------------------------------------------------------------------------------------------------|
| hypothetical protein LOC109359                                                                                                                                                                                                                               | C430003P19 Rik | NP_932134    | 47       | 3             | not classified                                                                     | not classified                                                                                                                         | not classified                                                                                                                                                                                           |
| OPA3 protein                                                                                                                                                                                                                                                 | Opa3           | NP_997408    | 20       | 3             | cellular_component, mitochondrion                                                  | molecular_function                                                                                                                     | biological_process                                                                                                                                                                                       |
| PREDICTED: similar to AFG3(ATPase family gene 3)-like 2 (yeast)                                                                                                                                                                                              | LOC100048880   | XP_001472434 | 33       | 3             | not classified                                                                     | not classified                                                                                                                         | not classified                                                                                                                                                                                           |
| PREDICTED: microtubule-actin crosslinking factor 1                                                                                                                                                                                                           | Macf1          | XP_001472773 | 608      | 3             | actin cytoskeleton, cell cortex, cytoplasm, cytoskeleton, microtubule cytoskeleton | actin binding, calcium ion binding, microtubule binding, protein binding                                                               | cell cycle arrest, cell motion, establishment or maintenance of cell polarity, mesoderm formation, posttranslational protein targeting to membrane, protein localization, Wnt receptor signaling pathway |
| PREDICTED: similar to FERMRhoGEF (Arhgef) and pleckstrin domain protein 1                                                                                                                                                                                    | LOC100045542   | XP_001473991 | 119      | 3             | not classified                                                                     | not classified                                                                                                                         | not classified                                                                                                                                                                                           |
| PREDICTED: similar to Eif2s2 protein                                                                                                                                                                                                                         | LOC100040220   | XP_001474301 | 38       | 3             | not classified                                                                     | not classified                                                                                                                         | not classified                                                                                                                                                                                           |
| PREDICTED: similar to ribosomal protein L23a                                                                                                                                                                                                                 | LOC100046437   | XP_001475762 | 18       | 3             | not classified                                                                     | not classified                                                                                                                         | not classified                                                                                                                                                                                           |
| PREDICTED: similar to Mus musculus ribosomal protein L19                                                                                                                                                                                                     | LOC100046041   | XP_001475785 | 23       | 3             | not classified                                                                     | not classified                                                                                                                         | not classified                                                                                                                                                                                           |
| PREDICTED: similar to PH domain leucine-rich repeat-containing protein phosphatase (PH domain leucine-rich repeat protein phosphatase) (Pleckstrin homology domain-containing family E protein 1) (Suprachiasmatic nucleus circadian oscillatory protein)... | Phlpp          | XP_001475889 | 183      | 3             | cytoplasm, membrane, nucleus                                                       | catalytic activity, hydrolase activity, manganese ion binding, metal ion binding, phosphoprotein phosphatase activity, protein binding | apoptosis                                                                                                                                                                                                |
| PREDICTED: similar to Tubulin, beta 4                                                                                                                                                                                                                        | LOC100042651   | XP_001479082 | 50       | 3             | not classified                                                                     | not classified                                                                                                                         | not classified                                                                                                                                                                                           |
| PREDICTED: similar to NADH dehydrogenase (ubiquinone) Fe-S protein 6                                                                                                                                                                                         | LOC631040      | XP_909811    | 13       | 3             | not classified                                                                     | not classified                                                                                                                         | not classified                                                                                                                                                                                           |
| PREDICTED: similar to mKIAA1116 protein isoform 8                                                                                                                                                                                                            | Rbm16          | XP_923871    | 139      | 3             | not classified                                                                     | not classified                                                                                                                         | not classified                                                                                                                                                                                           |
| PREDICTED: similar to endothelial monocyte-activating polypeptide                                                                                                                                                                                            | EG665509       | XP_988080    | 11       | 3             | not classified                                                                     | not classified                                                                                                                         | not classified                                                                                                                                                                                           |
| PREDICTED: similar to RIKEN cDNA 2610301G19 gene                                                                                                                                                                                                             | 2610301G19 Rik | XP_990438    | 103      | 3             | not classified                                                                     | not classified                                                                                                                         | not classified                                                                                                                                                                                           |
| PREDICTED: similar to zeta proteasome chain; PSMA5                                                                                                                                                                                                           | LOC676113      | XP_992657    | 26       | 3             | not classified                                                                     | not classified                                                                                                                         | not classified                                                                                                                                                                                           |
| G protein-coupled receptor 126                                                                                                                                                                                                                               | Gpr126         | NP_001002268 | 130      | 2             | cell surface, cytoplasm, integral to membrane, membrane, plasma membrane           | G-protein coupled receptor activity, receptor activity, signal transducer activity, transmembrane receptor activity                    | cell surface receptor linked signal transduction, G-protein coupled receptor protein signaling pathway, neuropeptide signaling pathway, signal transduction                                              |
| ubiquitin specific peptidase 7                                                                                                                                                                                                                               | Usp7           | NP_001003918 | 128      | 2             | cytoplasm, nucleus                                                                 | cysteine-type peptidase activity, hydrolase activity, peptidase activity, ubiquitin thiolesterase activity                             | modification-dependent protein catabolic process, ubiquitin-dependent protein catabolic process                                                                                                          |
| synaptic nuclear envelope 2                                                                                                                                                                                                                                  | Syne2          | NP_001005510 | 783      | 2             | myofibril, nuclear envelope, Z disc                                                | actin binding, molecular_function                                                                                                      | establishment or maintenance of cell polarity, fibroblast migration, nuclear envelope organization, protein localization in nucleus                                                                      |
| erythrocyte protein band 4.1-like 1 isoform a                                                                                                                                                                                                                | Epb4.111       | NP_001006665 | 98       | 2             | cytoplasm, cytoskeleton, extrinsic to membrane                                     | actin binding, binding, cytoskeletal protein binding, protein binding, structural molecule activity                                    | cortical actin cytoskeleton organization                                                                                                                                                                 |
| a disintegrin and metalloprotease domain 22 isoform b                                                                                                                                                                                                        | Adam22         | NP_001007222 | 91       | 2             | integral to membrane, membrane                                                     | metalloendopeptidase activity, metallopeptidase activity, zinc ion binding                                                             | proteolysis                                                                                                                                                                                              |
| unc-13 homolog D                                                                                                                                                                                                                                             | Unc13d         | NP_001009573 | 123      | 2             | not classified                                                                     | protein binding                                                                                                                        | defense response to virus, germinal center formation, granuloma formation, natural killer cell degranulation, phagocytosis                                                                               |

| Protein Name                                                                             | Gene Name     | Accession No | Mw (kDa) | Peptide Count | GO Component                                                                                          | GO Function                                                                                                                                                                                                                                                      | GO Process                                                                                                                                                                                                                                                                                                                                                                                   |
|------------------------------------------------------------------------------------------|---------------|--------------|----------|---------------|-------------------------------------------------------------------------------------------------------|------------------------------------------------------------------------------------------------------------------------------------------------------------------------------------------------------------------------------------------------------------------|----------------------------------------------------------------------------------------------------------------------------------------------------------------------------------------------------------------------------------------------------------------------------------------------------------------------------------------------------------------------------------------------|
| dynein, cytoplasmic 1 light intermediate chain 2                                         | Dync1li2      | NP_001013398 | 54       | 2             | cellular_component, dynein complex, microtubule                                                       | ATP binding, molecular_function, motor activity, nucleotide binding                                                                                                                                                                                              | biological_process                                                                                                                                                                                                                                                                                                                                                                           |
| UbiE-YGHL1 fusion protein                                                                | LOC554292     | NP_001019843 | 30       | 2             | not classified                                                                                        | not classified                                                                                                                                                                                                                                                   | not classified                                                                                                                                                                                                                                                                                                                                                                               |
| phosphodiesterase 1C isoform b                                                           | Pde1c         | NP_001020739 | 72       | 2             | not classified                                                                                        | 3',5'-cyclic-nucleotide phosphodiesterase activity, calcium- and calmodulin-regulated 3',5'-cyclic-GMP phosphodiesterase activity, calmodulin binding, calmodulin-dependent cyclic-nucleotide phosphodiesterase activity, catalytic activity, hydrolase activity | response to calcium ion, signal transduction                                                                                                                                                                                                                                                                                                                                                 |
| glutaminase 2 (liver, mitochondrial)                                                     | Gls2          | NP_001028436 | 66       | 2             | mitochondrion                                                                                         | glutaminase activity, hydrolase activity                                                                                                                                                                                                                         | glutamine metabolic process                                                                                                                                                                                                                                                                                                                                                                  |
| hypothetical protein LOC226527                                                           | BC026585      | NP_001028456 | 38       | 2             | not classified                                                                                        | binding, catalytic activity, oxidoreductase activity, zinc ion binding                                                                                                                                                                                           | metabolic process, oxidation reduction                                                                                                                                                                                                                                                                                                                                                       |
| PDGFA associated protein 1                                                               | Pdap1         | NP_001028485 | 21       | 2             | extracellular space                                                                                   | platelet-derived growth factor binding                                                                                                                                                                                                                           | platelet-derived growth factor receptor signaling pathway                                                                                                                                                                                                                                                                                                                                    |
| IQ motif containing GTPase activating protein 3                                          | Iqgap3        | NP_001028656 | 185      | 2             | not classified                                                                                        | not classified                                                                                                                                                                                                                                                   | not classified                                                                                                                                                                                                                                                                                                                                                                               |
| coiled-coil domain containing 139                                                        | Pus10         | NP_001028826 | 60       | 2             | not classified                                                                                        | isomerase activity                                                                                                                                                                                                                                               | tRNA processing                                                                                                                                                                                                                                                                                                                                                                              |
| ubiquitin protein ligase E3A isoform 3                                                   | Ube3a         | NP_001029134 | 98       | 2             | cytoplasm, cytosol, intracellular, nucleus, proteasome complex                                        | acid-amino acid ligase activity, ligase activity, protein binding, transcription coactivator activity, ubiquitin-protein ligase activity                                                                                                                         | androgen receptor signaling pathway, modification-dependent protein catabolic process, ovarian follicle development, positive regulation of phosphoinositide 3-kinase cascade, positive regulation of transcription from RNA polymerase II promoter, prostate gland growth, protein modification process, protein ubiquitination, sperm entry, ubiquitin-dependent protein catabolic process |
| hypothetical protein LOC328099                                                           | AU021838      | NP_001032835 | 28       | 2             | not classified                                                                                        | not classified                                                                                                                                                                                                                                                   | not classified                                                                                                                                                                                                                                                                                                                                                                               |
| zinc finger homeobox 2                                                                   | Zfx2          | NP_001034287 | 273      | 2             | cellular_component, nucleus                                                                           | DNA binding, metal ion binding, molecular_function, zinc ion binding                                                                                                                                                                                             | biological_process                                                                                                                                                                                                                                                                                                                                                                           |
| hypothetical protein LOC230866 isoform 2                                                 | C230096C10Rik | NP_001034289 | 111      | 2             | integral to membrane, membrane                                                                        | not classified                                                                                                                                                                                                                                                   | not classified                                                                                                                                                                                                                                                                                                                                                                               |
| Cd63 antigen                                                                             | Cd63          | NP_001036045 | 26       | 2             | endosome, endosome membrane, integral to membrane, late endosome, lysosome, membrane, plasma membrane | not classified                                                                                                                                                                                                                                                   | not classified                                                                                                                                                                                                                                                                                                                                                                               |
| heterogeneous nuclear ribonucleoprotein H3                                               | Hnmp3         | NP_001073293 | 37       | 2             | not classified                                                                                        | not classified                                                                                                                                                                                                                                                   | not classified                                                                                                                                                                                                                                                                                                                                                                               |
| thymopoietin isoform delta                                                               | Tmpo          | NP_001073599 | 46       | 2             | chromatin, chromosome, integral to membrane, membrane, nuclear envelope, nucleus                      | DNA binding, protein binding                                                                                                                                                                                                                                     | regulation of transcription                                                                                                                                                                                                                                                                                                                                                                  |
| cell division cycle 2-like 5 (cholinesterase-related cell division controller) isoform 1 | Cdc2l5        | NP_001074527 | 165      | 2             | not classified                                                                                        | ATP binding, cyclin-dependent protein kinase activity, kinase activity, nucleotide binding, protein kinase activity, protein serine/threonine kinase activity, transferase activity                                                                              | protein amino acid phosphorylation                                                                                                                                                                                                                                                                                                                                                           |
| hypothetical protein LOC69885                                                            | 2610002D18Rik | NP_001074568 | 38       | 2             | not classified                                                                                        | not classified                                                                                                                                                                                                                                                   | not classified                                                                                                                                                                                                                                                                                                                                                                               |

| Protein Name                                               | Gene Name | Accession No | Mw (kDa) | Peptide Count | GO Component                                                                 | GO Function                                                                                                                                                                                                                             | GO Process                                                                                                                                                                                                                                                                                                                        |
|------------------------------------------------------------|-----------|--------------|----------|---------------|------------------------------------------------------------------------------|-----------------------------------------------------------------------------------------------------------------------------------------------------------------------------------------------------------------------------------------|-----------------------------------------------------------------------------------------------------------------------------------------------------------------------------------------------------------------------------------------------------------------------------------------------------------------------------------|
| kinesin family member 13B                                  | Kif13b    | NP_001074646 | 205      | 2             | microtubule                                                                  | ATP binding, motor activity, nucleotide binding                                                                                                                                                                                         | not classified                                                                                                                                                                                                                                                                                                                    |
| breakpoint cluster region homolog                          | Bcr       | NP_001074881 | 143      | 2             | intracellular                                                                | ATP binding, GTPase activator activity, guanyl-nucleotide exchange factor activity, kinase activity, nucleotide binding, protein serine/threonine kinase activity, Rho guanyl-nucleotide exchange factor activity, transferase activity | brain development, intracellular signaling cascade, protein amino acid phosphorylation, regulation of cell cycle, regulation of Rho protein signal transduction, signal transduction                                                                                                                                              |
| vomer nasal receptor Vmn2r3                                | Vmn2r3    | NP_001098084 | 101      | 2             | not classified                                                               | not classified                                                                                                                                                                                                                          | not classified                                                                                                                                                                                                                                                                                                                    |
| arsenate resistance protein 2 isoform 3                    | Ars2      | NP_001103380 | 99       | 2             | cellular_component                                                           | molecular_function                                                                                                                                                                                                                      | not classified                                                                                                                                                                                                                                                                                                                    |
| Sjogren syndrome antigen B                                 | Ssb       | NP_001103615 | 48       | 2             | nucleus, ribonucleoprotein complex                                           | nucleic acid binding, nucleotide binding, RNA binding                                                                                                                                                                                   | RNA processing                                                                                                                                                                                                                                                                                                                    |
| SPEG complex locus isoform 1                               | Speg      | NP_031489    | 354      | 2             | nucleus                                                                      | ATP binding, kinase activity, nucleotide binding, protein kinase activity, protein serine/threonine kinase activity, transferase activity                                                                                               | cell differentiation, protein amino acid phosphorylation                                                                                                                                                                                                                                                                          |
| FXSD domain-containing ion transport regulator 2 isoform a | Fxyd2     | NP_031529    | 8        | 2             | integral to membrane, membrane                                               | ion channel activity, potassium ion binding, sodium ion binding                                                                                                                                                                         | ion transport, potassium ion transport, sodium ion transport, transport                                                                                                                                                                                                                                                           |
| capping protein (actin filament) muscle Z-line, alpha 2    | Capza2    | NP_031630    | 33       | 2             | cortical cytoskeleton, F-actin capping protein complex, membrane             | actin binding                                                                                                                                                                                                                           | actin cytoskeleton organization, actin filament capping                                                                                                                                                                                                                                                                           |
| chaperonin subunit 2 (beta)                                | Cct2      | NP_031662    | 57       | 2             | chaperonin-containing T-complex, cytoplasm                                   | ATP binding, nucleotide binding, protein binding, unfolded protein binding                                                                                                                                                              | cellular protein metabolic process, protein folding                                                                                                                                                                                                                                                                               |
| chaperonin containing Tcp1, subunit 7 (eta)                | Cct7      | NP_031664    | 60       | 2             | chaperonin-containing T-complex, cytoplasm                                   | ATP binding, identical protein binding, nucleotide binding, protein binding, unfolded protein binding                                                                                                                                   | cellular protein metabolic process, protein folding                                                                                                                                                                                                                                                                               |
| cysteine and glycine-rich protein 1                        | Csrp1     | NP_031817    | 21       | 2             | actin cytoskeleton, nucleus                                                  | metal ion binding, protein binding, zinc ion binding                                                                                                                                                                                    | actin cytoskeleton organization                                                                                                                                                                                                                                                                                                   |
| cathepsin H                                                | Ctsh      | NP_031827    | 37       | 2             | lysosome                                                                     | cysteine-type endopeptidase activity, cysteine-type peptidase activity, hydrolase activity, peptidase activity                                                                                                                          | proteolysis                                                                                                                                                                                                                                                                                                                       |
| cortactin                                                  | Cttn      | NP_031829    | 61       | 2             | cell cortex, cell projection, cytoplasm, cytoskeleton, lamellipodium, ruffle | protein binding                                                                                                                                                                                                                         | not classified                                                                                                                                                                                                                                                                                                                    |
| Ewing sarcoma breakpoint region 1                          | Ewsr1     | NP_031994    | 68       | 2             | cytoplasm, intracellular, membrane, nucleus, plasma membrane                 | calmodulin binding, metal ion binding, nucleic acid binding, nucleotide binding, RNA binding, zinc ion binding                                                                                                                          | regulation of transcription, transcription                                                                                                                                                                                                                                                                                        |
| frataxin                                                   | Fxn       | NP_032070    | 23       | 2             | mitochondrion                                                                | not classified                                                                                                                                                                                                                          | adult walking behavior, aerobic respiration, cellular iron ion homeostasis, embryonic development ending in birth or egg hatching, iron sulfur cluster assembly, mitochondrion organization, negative regulation of multicellular organism growth, negative regulation of organ growth, oxidative phosphorylation, proprioception |



| Protein Name                                            | Gene Name | Accession No | Mw (kDa) | Peptide Count | GO Component                                                                               | GO Function                                                                                                                                                 | GO Process                                                                                                                                                                                                                                                                                                                                                                                                                                                                                                                                                                           |
|---------------------------------------------------------|-----------|--------------|----------|---------------|--------------------------------------------------------------------------------------------|-------------------------------------------------------------------------------------------------------------------------------------------------------------|--------------------------------------------------------------------------------------------------------------------------------------------------------------------------------------------------------------------------------------------------------------------------------------------------------------------------------------------------------------------------------------------------------------------------------------------------------------------------------------------------------------------------------------------------------------------------------------|
| insulin-like growth factor binding protein 7            | Igfbp7    | NP_032074    | 29       | 2             | extracellular region                                                                       | growth factor binding, insulin-like growth factor binding, protein binding                                                                                  | cell adhesion, regulation of cell growth                                                                                                                                                                                                                                                                                                                                                                                                                                                                                                                                             |
| myotrophin                                              | Mtpn      | NP_032124    | 13       | 2             | cytoplasm                                                                                  | not classified                                                                                                                                              | not classified                                                                                                                                                                                                                                                                                                                                                                                                                                                                                                                                                                       |
| gamma-glutamyltransferase 1                             | Ggt1      | NP_032142    | 62       | 2             | integral to membrane, integral to plasma membrane, membrane                                | acyltransferase activity, gamma-glutamyltransferase activity, transferase activity                                                                          | glutathione biosynthetic process, glutathione metabolic process, spermatogenesis                                                                                                                                                                                                                                                                                                                                                                                                                                                                                                     |
| guanine nucleotide binding protein, alpha q polypeptide | Gnaq      | NP_032165    | 42       | 2             | heterotrimeric G-protein complex, membrane fraction, plasma membrane                       | GTP binding, GTPase activity, guanyl nucleotide binding, nucleotide binding, protein binding, signal transducer activity                                    | activation of adenylate cyclase activity by G-protein signaling pathway, activation of phospholipase C activity by dopamine receptor signaling pathway, behavior, embryonic digit morphogenesis, forebrain neuron development, glutamate signaling pathway, G-protein coupled receptor protein signaling pathway, heart development, neuron remodeling, pigmentation during development, post-embryonic development, protein amino acid ADP-ribosylation, regulation of action potential, regulation of melanocyte differentiation, signal transduction, skeletal system development |
| guanine nucleotide-binding protein, beta-1 subunit      | Gnb1      | NP_032168    | 37       | 2             | heterotrimeric G-protein complex, photoreceptor outer segment                              | GTPase activity, signal transducer activity                                                                                                                 | activation of phospholipase C activity by G-protein coupled receptor protein signaling pathway coupled to IP3 second messenger, cell proliferation, G-protein coupled receptor protein signaling pathway, phototransduction, visible light, sensory perception of taste, signal transduction                                                                                                                                                                                                                                                                                         |
| glutathione peroxidase 4 isoform 2 precursor            | Gpx4      | NP_032188    | 22       | 2             | cytoplasm, cytosol, mitochondrial inner membrane, mitochondrion, nuclear envelope, nucleus | glutathione peroxidase activity, oxidoreductase activity, peroxidase activity, phospholipid-hydroperoxide glutathione peroxidase activity, selenium binding | chromatin organization, multicellular organismal development, oxidation reduction, response to oxidative stress, spermatogenesis                                                                                                                                                                                                                                                                                                                                                                                                                                                     |

| Protein Name                                | Gene Name | Accession No | Mw (kDa) | Peptide Count | GO Component                                                                                      | GO Function                                                                                                                                                                                                                          | GO Process                                                                                                                                                                                                                                                                                 |
|---------------------------------------------|-----------|--------------|----------|---------------|---------------------------------------------------------------------------------------------------|--------------------------------------------------------------------------------------------------------------------------------------------------------------------------------------------------------------------------------------|--------------------------------------------------------------------------------------------------------------------------------------------------------------------------------------------------------------------------------------------------------------------------------------------|
| histone deacetylase 1                       | Hdac1     | NP_032254    | 55       | 2             | cell soma, cytoplasm, heterochromatin, histone deacetylase complex, nucleus, NuRD complex         | chromatin binding, DNA binding, histone deacetylase activity, hydrolase activity, protein binding, transcription corepressor activity, transcription factor activity, transcription factor binding, transcription repressor activity | chromatin modification, endoderm development, hippocampus development, histone deacetylation, negative regulation of gene-specific transcription from RNA polymerase II promoter, negative regulation of transcription, neuron differentiation, regulation of transcription, transcription |
| 3-hydroxy-3-methylglutaryl-Coenzyme A lyase | Hmgcl     | NP_032280    | 34       | 2             | mitochondrial inner membrane, mitochondrion                                                       | catalytic activity, hydroxymethylglutaryl-CoA lyase activity, lyase activity, metal ion binding                                                                                                                                      | metabolic process                                                                                                                                                                                                                                                                          |
| homeobox A4                                 | Hoxa4     | NP_032291    | 30       | 2             | nucleus                                                                                           | DNA binding, sequence-specific DNA binding, transcription factor activity, transcription regulator activity                                                                                                                          | anterior/posterior pattern formation, embryonic skeletal system morphogenesis, multicellular organismal development, regulation of transcription, regulation of transcription, DNA-dependent, transcription                                                                                |
| Harvey rat sarcoma virus oncogene 1         | Hras1     | NP_032310    | 21       | 2             | Golgi apparatus, intracellular, membrane, plasma membrane                                         | GTP binding, nucleotide binding, protein binding                                                                                                                                                                                     | cell aging, cell proliferation, endocytosis, negative regulation of neuron apoptosis, positive regulation of cell proliferation, Ras protein signal transduction, regulation of long-term neuronal synaptic plasticity, small GTPase mediated signal transduction                          |
| integral membrane protein 1                 | Stt3a     | NP_032434    | 81       | 2             | endoplasmic reticulum, integral to membrane, membrane, membrane fraction                          | dolichyl-diphosphooligosaccharide-protein glycotransferase activity, oligosaccharyl transferase activity, transferase activity                                                                                                       | protein amino acid glycosylation                                                                                                                                                                                                                                                           |
| laminin, gamma 2                            | Lamc2     | NP_032511    | 130      | 2             | basement membrane, extracellular matrix, extracellular region, proteinaceous extracellular matrix | heparin binding, protein binding                                                                                                                                                                                                     | cell adhesion                                                                                                                                                                                                                                                                              |
| leukotriene C4 synthase                     | Ltc4s     | NP_032547    | 17       | 2             | endoplasmic reticulum, integral to membrane, membrane, nucleus                                    | enzyme activator activity, leukotriene-C4 synthase activity, lipid binding, lyase activity                                                                                                                                           | leukotriene biosynthetic process, leukotriene metabolic process                                                                                                                                                                                                                            |

| Protein Name                                                           | Gene Name | Accession No | Mw (kDa) | Peptide Count | GO Component                                                                                                                                                                    | GO Function                                                                                                                                                                                     | GO Process                                                                                                                                                                                                                                                                                                                                                                                                                                                                                                                                                                                                                                                                                                                |
|------------------------------------------------------------------------|-----------|--------------|----------|---------------|---------------------------------------------------------------------------------------------------------------------------------------------------------------------------------|-------------------------------------------------------------------------------------------------------------------------------------------------------------------------------------------------|---------------------------------------------------------------------------------------------------------------------------------------------------------------------------------------------------------------------------------------------------------------------------------------------------------------------------------------------------------------------------------------------------------------------------------------------------------------------------------------------------------------------------------------------------------------------------------------------------------------------------------------------------------------------------------------------------------------------------|
| nucleophosmin 1                                                        | Npm1      | NP_032748    | 33       | 2             | centrosome, cytoplasm, cytosol, granular component, large ribosomal subunit, nuclear speck, nucleolus, nucleoplasm, nucleus, ribonucleoprotein complex, small ribosomal subunit | DNA binding, nucleic acid binding, protein binding, ribosomal large subunit binding, ribosomal small subunit binding, RNA binding, rRNA binding                                                 | cell growth, cell volume homeostasis, negative regulation of nuclear mRNA splicing, via spliceosome, nucleocytoplasmic transport, positive regulation of cell proliferation, positive regulation of cellular biosynthetic process, positive regulation of centrosome duplication, positive regulation of protein kinase activity, protein localization, protein oligomerization, regulation of cell cycle, regulation of centrosome duplication, regulation of DNA damage response, signal transduction by p53 class mediator, ribosomal large subunit biogenesis, ribosomal large subunit export from nucleus, ribosomal small subunit biogenesis, ribosomal small subunit export from nucleus, rRNA export from nucleus |
| platelet-activating factor acetylhydrolase, isoform 1b, alpha2 subunit | Pafah1b2  | NP_032801    | 26       | 2             | cytoplasm                                                                                                                                                                       | 1-alkyl-2-acetylglycerophosphocholine esterase activity, hydrolase activity, hydrolase activity, acting on ester bonds, lipase activity                                                         | cell motion, lipid catabolic process, lipid metabolic process, spermatogenesis                                                                                                                                                                                                                                                                                                                                                                                                                                                                                                                                                                                                                                            |
| protein kinase, cGMP-dependent, type II                                | Prkg2     | NP_032952    | 87       | 2             | not classified                                                                                                                                                                  | ATP binding, cGMP binding, cGMP-dependent protein kinase activity, kinase activity, nucleotide binding, protein kinase activity, protein serine/threonine kinase activity, transferase activity | protein amino acid phosphorylation                                                                                                                                                                                                                                                                                                                                                                                                                                                                                                                                                                                                                                                                                        |
| RAD21 homolog                                                          | Rad21     | NP_033035    | 72       | 2             | nuclear chromosome, nucleus                                                                                                                                                     | calcium ion binding                                                                                                                                                                             | apoptosis, cell cycle, cell division, chromosome segregation, DNA repair, mitosis, response to DNA damage stimulus                                                                                                                                                                                                                                                                                                                                                                                                                                                                                                                                                                                                        |
| ribosomal protein S4, X-linked                                         | Rps4x     | NP_033120    | 30       | 2             | intracellular, ribonucleoprotein complex, ribosome, small ribosomal subunit                                                                                                     | RNA binding, rRNA binding, structural constituent of ribosome                                                                                                                                   | translation                                                                                                                                                                                                                                                                                                                                                                                                                                                                                                                                                                                                                                                                                                               |
| neuroplastin                                                           | Nptn      | NP_033171    | 31       | 2             | integral to membrane, membrane, plasma membrane                                                                                                                                 | not classified                                                                                                                                                                                  | not classified                                                                                                                                                                                                                                                                                                                                                                                                                                                                                                                                                                                                                                                                                                            |

| Protein Name                                                                                | Gene Name | Accession No | Mw (kDa) | Peptide Count | GO Component                                                                                                                        | GO Function                                                                                                                                                                                                | GO Process                                                                                                                                                                                                                                                                                                                                              |
|---------------------------------------------------------------------------------------------|-----------|--------------|----------|---------------|-------------------------------------------------------------------------------------------------------------------------------------|------------------------------------------------------------------------------------------------------------------------------------------------------------------------------------------------------------|---------------------------------------------------------------------------------------------------------------------------------------------------------------------------------------------------------------------------------------------------------------------------------------------------------------------------------------------------------|
| stimulated by retinoic acid gene 8                                                          | Stra8     | NP_033318    | 45       | 2             | cytoplasm                                                                                                                           | not classified                                                                                                                                                                                             | DNA replication, female meiosis sister chromatid cohesion, fertilization, meiosis, meiotic cell cycle DNA replication checkpoint, meiotic chromosome condensation, meiotic DNA double-strand break formation, oocyte development, ovarian follicle development, reciprocal meiotic recombination, regulation of organ growth, spermatogenesis, synapsis |
| topoisomerase (DNA) II beta                                                                 | Top2b     | NP_033435    | 182      | 2             | chromosome, nucleus                                                                                                                 | ATP binding, DNA binding, DNA topoisomerase (ATP-hydrolyzing) activity, DNA topoisomerase activity, isomerase activity, nucleotide binding                                                                 | axonogenesis, DNA metabolic process, DNA topological change, forebrain development, neuron migration                                                                                                                                                                                                                                                    |
| ubiquitin-conjugating enzyme E2L 3                                                          | Ube2l3    | NP_033482    | 18       | 2             | not classified                                                                                                                      | ATP binding, ligase activity, nucleotide binding, small conjugating protein ligase activity, ubiquitin-protein ligase activity                                                                             | modification-dependent protein catabolic process, post-translational protein modification, regulation of protein metabolic process                                                                                                                                                                                                                      |
| uromodulin                                                                                  | Umod      | NP_033496    | 71       | 2             | anchored to membrane, apical plasma membrane, extracellular region, membrane, plasma membrane                                       | calcium ion binding                                                                                                                                                                                        | not classified                                                                                                                                                                                                                                                                                                                                          |
| ubiquitin specific protease 9, X chromosome                                                 | Usp9x     | NP_033507    | 290      | 2             | cytoplasm                                                                                                                           | cysteine-type peptidase activity, hydrolase activity, peptidase activity, protein binding, ubiquitin thiolesterase activity                                                                                | cell cycle, cell division, chromosome segregation, mitosis, modification-dependent protein catabolic process, ubiquitin-dependent protein catabolic process                                                                                                                                                                                             |
| viral oncogene yes homolog                                                                  | Yes1      | NP_033561    | 61       | 2             | cytoplasm                                                                                                                           | ATP binding, kinase activity, non-membrane spanning protein tyrosine kinase activity, nucleotide binding, protein binding, protein kinase activity, protein tyrosine kinase activity, transferase activity | glucose transport, protein amino acid phosphorylation                                                                                                                                                                                                                                                                                                   |
| a disintegrin-like and metalloprotease (repolysin type) with thrombospondin type 1 motif, 1 | Adamts1   | NP_033751    | 106      | 2             | basement membrane, cytoplasmic vesicle, extracellular matrix, extracellular region, proteinaceous extracellular matrix              | heparin binding, hydrolase activity, metal ion binding, metalloendopeptidase activity, metallopeptidase activity, peptidase activity, protein binding, zinc ion binding                                    | heart trabecula formation, kidney development, negative regulation of angiogenesis, ovulation from ovarian follicle, proteolysis                                                                                                                                                                                                                        |
| calpain, small subunit 1                                                                    | Capns1    | NP_033925    | 28       | 2             | cytoplasm, membrane, plasma membrane                                                                                                | calcium ion binding, calcium-dependent cysteine-type endopeptidase activity                                                                                                                                | not classified                                                                                                                                                                                                                                                                                                                                          |
| capping protein (actin filament) muscle Z-line, beta isoform b                              | Capzb     | NP_033928    | 31       | 2             | cortical cytoskeleton, cytoplasm, cytoskeleton, F-actin capping protein complex, intercalated disc, lamellipodium, membrane, Z disc | actin binding                                                                                                                                                                                              | actin cytoskeleton organization, actin filament capping, cell projection organization, lamellipodium assembly                                                                                                                                                                                                                                           |

| Protein Name                                                          | Gene Name | Accession No | Mw (kDa) | Peptide Count | GO Component                                                                                                                        | GO Function                                                                                                                                                                                                                      | GO Process                                                                                                                                                                                                                                                                                                                                          |
|-----------------------------------------------------------------------|-----------|--------------|----------|---------------|-------------------------------------------------------------------------------------------------------------------------------------|----------------------------------------------------------------------------------------------------------------------------------------------------------------------------------------------------------------------------------|-----------------------------------------------------------------------------------------------------------------------------------------------------------------------------------------------------------------------------------------------------------------------------------------------------------------------------------------------------|
| cytochrome c oxidase, subunit VIIa 1                                  | Cox7a1    | NP_034074    | 9        | 2             | integral to membrane, membrane, mitochondrial inner membrane, mitochondrial respiratory chain, mitochondrion                        | cytochrome-c oxidase activity, electron carrier activity                                                                                                                                                                         | not classified                                                                                                                                                                                                                                                                                                                                      |
| DNA methyltransferase (cytosine-5) 1                                  | Dnmt1     | NP_034196    | 183      | 2             | centromeric heterochromatin, cytoplasm, heterochromatin, nucleus, replication fork                                                  | DNA (cytosine-5)-methyltransferase activity, DNA binding, metal ion binding, methyltransferase activity, protein binding, transcription factor binding, transcription repressor activity, transferase activity, zinc ion binding | DNA methylation, gene silencing, maintenance of DNA methylation, negative regulation of transcription, DNA-dependent, regulation of cell proliferation, regulation of gene expression, regulation of transcription, transcription                                                                                                                   |
| epidermal growth factor                                               | Egf       | NP_034243    | 133      | 2             | extracellular region, extracellular space, integral to membrane, membrane, plasma membrane                                          | calcium ion binding, epidermal growth factor receptor binding, growth factor activity                                                                                                                                            | activation of MAPKK activity, branching morphogenesis of a tube, epidermal growth factor receptor signaling pathway, mammary gland alveolus development, peptidyl-tyrosine phosphorylation, positive regulation of cell proliferation, positive regulation of granule cell precursor proliferation, regulation of peptidyl-tyrosine phosphorylation |
| flavin containing monooxygenase 1                                     | Fmo1      | NP_034361    | 60       | 2             | endoplasmic reticulum, integral to membrane, intrinsic to endoplasmic reticulum membrane, membrane, microsome                       | FAD binding, flavin-containing monooxygenase activity, monooxygenase activity, NADP or NADPH binding, oxidoreductase activity                                                                                                    | oxidation reduction                                                                                                                                                                                                                                                                                                                                 |
| glutathione S-transferase, alpha 4                                    | Gsta4     | NP_034487    | 26       | 2             | cellular_component, cytoplasm                                                                                                       | glutathione transferase activity, transferase activity                                                                                                                                                                           | metabolic process                                                                                                                                                                                                                                                                                                                                   |
| glutathione S-transferase, theta 2                                    | Gstt2     | NP_034491    | 28       | 2             | cytoplasm, nucleus                                                                                                                  | glutathione transferase activity, transferase activity                                                                                                                                                                           | glutathione metabolic process                                                                                                                                                                                                                                                                                                                       |
| glutathione transferase zeta 1 (maleylacetoacetate isomerase)         | Gstz1     | NP_034493    | 24       | 2             | cytoplasm, mitochondrion                                                                                                            | catalytic activity, glutathione transferase activity, isomerase activity, maleylacetoacetate isomerase activity, transferase activity                                                                                            | aromatic amino acid family metabolic process, L-phenylalanine catabolic process, tyrosine catabolic process                                                                                                                                                                                                                                         |
| heterogeneous nuclear ribonucleoprotein A/B isoform 2                 | Hnmpab    | NP_034578    | 31       | 2             | cytoplasm, nucleus, ribonucleoprotein complex                                                                                       | DNA binding, nucleic acid binding, nucleotide binding, protein binding, RNA binding, sequence-specific DNA binding, transcription factor activity                                                                                | epithelial to mesenchymal transition, positive regulation of gene-specific transcription, regulation of transcription, transcription                                                                                                                                                                                                                |
| laminin, gamma 1                                                      | Lamc1     | NP_034813    | 177      | 2             | basal lamina, basement membrane, extracellular matrix, extracellular region, laminin-10 complex, proteinaceous extracellular matrix | protein binding                                                                                                                                                                                                                  | cell adhesion                                                                                                                                                                                                                                                                                                                                       |
| myeloid/lymphoid or mixed lineage-leukemia translocation to 4 homolog | Mlit4     | NP_034936    | 206      | 2             | adherens junction, cell junction, cell-cell adherens junction, cytoplasm                                                            | cell adhesion molecule binding, protein binding                                                                                                                                                                                  | cell adhesion, signal transduction                                                                                                                                                                                                                                                                                                                  |
| mitochondrial ribosomal protein L40                                   | Mrpl40    | NP_035052    | 24       | 2             | mitochondrion, ribonucleoprotein complex, ribosome                                                                                  | molecular_function                                                                                                                                                                                                               | biological_process                                                                                                                                                                                                                                                                                                                                  |

| Protein Name                                       | Gene Name | Accession No | Mw (kDa) | Peptide Count | GO Component                                                                                          | GO Function                                                                                                                                                                                                                                                 | GO Process                                                                                                                                                                                                                                                                                                                                                                                                                                  |
|----------------------------------------------------|-----------|--------------|----------|---------------|-------------------------------------------------------------------------------------------------------|-------------------------------------------------------------------------------------------------------------------------------------------------------------------------------------------------------------------------------------------------------------|---------------------------------------------------------------------------------------------------------------------------------------------------------------------------------------------------------------------------------------------------------------------------------------------------------------------------------------------------------------------------------------------------------------------------------------------|
| phosphoenolpyruvate carboxykinase 1, cytosolic     | Pck1      | NP_035174    | 69       | 2             | cytoplasm                                                                                             | carboxy-lyase activity, GTP binding, kinase activity, lyase activity, manganese ion binding, metal ion binding, nucleotide binding, phosphoenolpyruvate carboxykinase (GTP) activity, phosphoenolpyruvate carboxykinase activity, purine nucleotide binding | gluconeogenesis, glycerol biosynthetic process from pyruvate, lipid metabolic process                                                                                                                                                                                                                                                                                                                                                       |
| phosphoprotein enriched in astrocytes 15 isoform 2 | Pea15a    | NP_035193    | 15       | 2             | cytoplasm, membrane fraction, microtubule associated complex                                          | protein binding, protein kinase C binding                                                                                                                                                                                                                   | apoptosis, carbohydrate transport, intracellular signaling cascade, regulation of apoptosis, transport                                                                                                                                                                                                                                                                                                                                      |
| signal-induced proliferation associated gene 1     | Sipa1     | NP_035509    | 112      | 2             | intracellular, nucleus                                                                                | GTPase activator activity, protein binding                                                                                                                                                                                                                  | regulation of cell cycle, regulation of small GTPase mediated signal transduction                                                                                                                                                                                                                                                                                                                                                           |
| superoxide dismutase 3, extracellular              | Sod3      | NP_035565    | 27       | 2             | extracellular region, extracellular space, trans-Golgi network                                        | antioxidant activity, copper ion binding, metal ion binding, oxidoreductase activity, protein binding, superoxide dismutase activity, zinc ion binding                                                                                                      | oxidation reduction, response to hypoxia, superoxide metabolic process                                                                                                                                                                                                                                                                                                                                                                      |
| timeless homolog                                   | Timeless  | NP_035719    | 138      | 2             | nucleus                                                                                               | protein binding, protein heterodimerization activity, protein homodimerization activity                                                                                                                                                                     | branching involved in ureteric bud morphogenesis, branching morphogenesis of a tube, cell cycle, cell division, circadian rhythm, embryonic development, lung development, mitosis, morphogenesis of an epithelium, multicellular organismal development, negative regulation of gene-specific transcription from RNA polymerase II promoter, regulation of transcription, response to DNA damage stimulus, rhythmic process, transcription |
| tight junction protein 2                           | Tjp2      | NP_035727    | 131      | 2             | cell junction, gap junction, membrane, nucleus, plasma membrane, tight junction                       | protein binding                                                                                                                                                                                                                                             | not classified                                                                                                                                                                                                                                                                                                                                                                                                                              |
| translin                                           | Tsn       | NP_035780    | 26       | 2             | cytoplasm, nucleus                                                                                    | DNA binding, mRNA binding, protein binding, RNA binding, sequence-specific DNA binding                                                                                                                                                                      | not classified                                                                                                                                                                                                                                                                                                                                                                                                                              |
| lin 7 homolog c                                    | Lin7c     | NP_035829    | 22       | 2             | cell junction, membrane, plasma membrane, postsynaptic membrane, synapse, synaptosome, tight junction | protein binding                                                                                                                                                                                                                                             | exocytosis, neurotransmitter secretion, protein transport, transport                                                                                                                                                                                                                                                                                                                                                                        |
| tryptophanyl-tRNA synthetase                       | Wars      | NP_035840    | 54       | 2             | cytoplasm                                                                                             | aminoacyl-tRNA ligase activity, ATP binding, ligase activity, nucleotide binding, tryptophan-tRNA ligase activity                                                                                                                                           | translation, tRNA aminoacylation for protein translation, tryptophanyl-tRNA aminoacylation                                                                                                                                                                                                                                                                                                                                                  |

| Protein Name                                                       | Gene Name | Accession No | Mw (kDa) | Peptide Count | GO Component                                                                                                                                                                                                                                                | GO Function                                                                                                                                                                                                          | GO Process                                                                                                                                                                                                                                                                                                       |
|--------------------------------------------------------------------|-----------|--------------|----------|---------------|-------------------------------------------------------------------------------------------------------------------------------------------------------------------------------------------------------------------------------------------------------------|----------------------------------------------------------------------------------------------------------------------------------------------------------------------------------------------------------------------|------------------------------------------------------------------------------------------------------------------------------------------------------------------------------------------------------------------------------------------------------------------------------------------------------------------|
| G protein-coupled receptor 34                                      | Gpr34     | NP_035953    | 43       | 2             | integral to membrane, membrane, plasma membrane                                                                                                                                                                                                             | G-protein coupled receptor activity, purinergic nucleotide receptor activity, G-protein coupled, receptor activity, signal transducer activity                                                                       | G-protein coupled receptor protein signaling pathway, signal transduction                                                                                                                                                                                                                                        |
| HCLS1 associated X-1                                               | Hax1      | NP_035956    | 32       | 2             | endoplasmic reticulum, membrane, mitochondrion, nucleus                                                                                                                                                                                                     | protein binding                                                                                                                                                                                                      | cell surface receptor linked signal transduction                                                                                                                                                                                                                                                                 |
| membrane bound C2 domain containing protein                        | Mbc2      | NP_035973    | 122      | 2             | integral to membrane, membrane                                                                                                                                                                                                                              | not classified                                                                                                                                                                                                       | not classified                                                                                                                                                                                                                                                                                                   |
| poly(rC) binding protein 1                                         | Pcbp1     | NP_035995    | 37       | 2             | nucleus, ribonucleoprotein complex                                                                                                                                                                                                                          | DNA binding, protein binding, RNA binding, translation activator activity                                                                                                                                            | mRNA processing                                                                                                                                                                                                                                                                                                  |
| evolutionarily conserved signaling intermediate in Toll pathway    | Ecsit     | NP_036159    | 50       | 2             | cytoplasm, mitochondrion, nucleus, transcription factor complex                                                                                                                                                                                             | protein binding, RNA polymerase II transcription factor activity, signal transducer activity, transcription factor activity                                                                                          | BMP signaling pathway, immune response, innate immune response, mesoderm formation, regulation of transcription from RNA polymerase II promoter, transmembrane receptor protein serine/threonine kinase signaling pathway                                                                                        |
| nitrilase 1                                                        | Nit1      | NP_036179    | 36       | 2             | cellular_component                                                                                                                                                                                                                                          | hydrolase activity, hydrolase activity, acting on carbon-nitrogen (but not peptide) bonds                                                                                                                            | nitrogen compound metabolic process                                                                                                                                                                                                                                                                              |
| ATP-binding cassette 1, sub-family A, member 1                     | Abca1     | NP_038482    | 254      | 2             | Golgi apparatus, integral to membrane, integral to plasma membrane, intracellular membrane-bounded organelle, membrane, plasma membrane                                                                                                                     | anion transmembrane transporter activity, ATP binding, ATPase activity, cholesterol transporter activity, nucleoside-triphosphatase activity, nucleotide binding, phospholipid transporter activity, protein binding | cholesterol efflux, cholesterol metabolic process, cholesterol transport, lipoprotein biosynthetic process, lipoprotein metabolic process, peptide secretion, phagocytosis, engulfment, phospholipid efflux, phospholipid translocation, protein amino acid lipidation, reverse cholesterol transport, transport |
| synaptotagmin-like 4                                               | Syt4      | NP_038785    | 76       | 2             | cytoplasmic vesicle, extrinsic to membrane, membrane, secretory granule                                                                                                                                                                                     | metal ion binding, neurexin binding, phospholipid binding, protein binding, Rab GTPase binding, zinc ion binding                                                                                                     | exocytosis, intracellular protein transport                                                                                                                                                                                                                                                                      |
| ATP synthase, H+ transporting, mitochondrial F0 complex, subunit G | Atp5i     | NP_038823    | 11       | 2             | membrane, mitochondrial inner membrane, mitochondrial proton-transporting ATP synthase complex, mitochondrial proton-transporting ATP synthase complex, coupling factor F(o), mitochondrion, proton-transporting ATP synthase complex, coupling factor F(o) | hydrogen ion transmembrane transporter activity, hydrogen-exporting ATPase activity, phosphorylative mechanism                                                                                                       | ATP biosynthetic process, ATP synthesis coupled proton transport, ion transport, proton transport, transport                                                                                                                                                                                                     |
| klotho                                                             | Kl        | NP_038851    | 116      | 2             | extracellular region, integral to membrane, membrane, plasma membrane                                                                                                                                                                                       | beta-glucuronidase activity, catalytic activity, cation binding, hydrolase activity, hydrolase activity, acting on glycosyl bonds, hydrolase activity, hydrolyzing O-glycosyl compounds, protein binding             | aging, carbohydrate metabolic process, energy reserve metabolic process, metabolic process                                                                                                                                                                                                                       |

| Protein Name                                                           | Gene Name | Accession No | Mw (kDa) | Peptide Count | GO Component                                                                                                                      | GO Function                                                                                                                                                                                                                                                                                                                                                             | GO Process                                                                                                                                                                            |
|------------------------------------------------------------------------|-----------|--------------|----------|---------------|-----------------------------------------------------------------------------------------------------------------------------------|-------------------------------------------------------------------------------------------------------------------------------------------------------------------------------------------------------------------------------------------------------------------------------------------------------------------------------------------------------------------------|---------------------------------------------------------------------------------------------------------------------------------------------------------------------------------------|
| TROVE domain family, member 2                                          | Trove2    | NP_038863    | 60       | 2             | cytoplasm, ribonucleoprotein complex                                                                                              | nucleic acid binding, protein binding, RNA binding                                                                                                                                                                                                                                                                                                                      | not classified                                                                                                                                                                        |
| glycine C-acetyltransferase (2-amino-3-ketobutyrate-coenzyme A ligase) | Gcat      | NP_038875    | 45       | 2             | mitochondrial inner membrane, mitochondrion                                                                                       | acyltransferase activity, catalytic activity, glycine C-acetyltransferase activity, pyridoxal phosphate binding, transferase activity, transference activity, transferring nitrogenous groups                                                                                                                                                                           | biosynthetic process, metabolic process                                                                                                                                               |
| chloride intracellular channel 4 (mitochondrial)                       | Clic4     | NP_038913    | 29       | 2             | chloride channel complex, cytoplasm, cytoplasmic vesicle, integral to membrane, membrane, mitochondrion, nucleus, plasma membrane | chloride channel activity, chloride ion binding, ion channel activity, protein binding, voltage-gated chloride channel activity, voltage-gated ion channel activity                                                                                                                                                                                                     | chloride transport, ion transport, transport                                                                                                                                          |
| ATPas, class II, type 9B                                               | Atp9b     | NP_056620    | 128      | 2             | integral to membrane, membrane                                                                                                    | ATP binding, ATPase activity, coupled to transmembrane movement of ions, phosphorylative mechanism, catalytic activity, hydrolase activity, hydrolase activity, acting on acid anhydrides, catalyzing transmembrane movement of substances, magnesium ion binding, metal ion binding, nucleotide binding, phospholipid-translocating ATPase activity, receptor activity | ATP biosynthetic process, metabolic process, phospholipid transport                                                                                                                   |
| S-adenosylhomocysteine hydrolase                                       | Ahcy      | NP_057870    | 48       | 2             | cytoplasm, cytosol                                                                                                                | adenosylhomocysteinase activity, copper ion binding, hydrolase activity, protein self-association                                                                                                                                                                                                                                                                       | one-carbon metabolic process, S-adenosylhomocysteine catabolic process                                                                                                                |
| MYB binding protein (P160) 1a                                          | Mybbp1a   | NP_058056    | 152      | 2             | cytoplasm, NLS-dependent protein nuclear import complex, nucleolus, nucleus                                                       | DNA binding, DNA-directed DNA polymerase activity, protein binding, transcription factor binding, transcription repressor activity, zinc ion binding                                                                                                                                                                                                                    | negative regulation of transcription, nucleocytoplasmic transport, regulation of transcription, respiratory electron transport chain, transcription                                   |
| thiopurine methyltransferase                                           | Tpmt      | NP_058065    | 28       | 2             | cytoplasm                                                                                                                         | methyltransferase activity, thiopurine S-methyltransferase activity, transferase activity                                                                                                                                                                                                                                                                               | metabolic process                                                                                                                                                                     |
| vesicle-associated membrane protein 8                                  | Vamp8     | NP_058074    | 11       | 2             | early endosome, integral to membrane, membrane                                                                                    | protein binding                                                                                                                                                                                                                                                                                                                                                         | vesicle-mediated transport                                                                                                                                                            |
| squamous cell carcinoma antigen recognized by T-cells 3                | Sart3     | NP_058622    | 110      | 2             | cytoplasm, intracellular, nucleus                                                                                                 | nucleic acid binding, nucleotide binding, RNA binding                                                                                                                                                                                                                                                                                                                   | RNA processing                                                                                                                                                                        |
| osteoclast stimulating factor 1                                        | Ostf1     | NP_059071    | 24       | 2             | cellular_component, cytoplasm                                                                                                     | protein binding                                                                                                                                                                                                                                                                                                                                                         | not classified                                                                                                                                                                        |
| solute carrier family 5 (inositol transporters), member 3              | Slc5a3    | NP_059087    | 80       | 2             | integral to membrane, membrane                                                                                                    | sodium ion binding, symporter activity, transporter activity                                                                                                                                                                                                                                                                                                            | inositol metabolic process, ion transport, myo-inositol transport, peripheral nervous system development, regulation of respiratory gaseous exchange, sodium ion transport, transport |
| sorting nexin 3                                                        | Snx3      | NP_059500    | 19       | 2             | cellular_component                                                                                                                | molecular_function, phosphoinositide binding, protein binding                                                                                                                                                                                                                                                                                                           | biological_process, cell communication, protein transport, transport                                                                                                                  |



| Protein Name                                                 | Gene Name | Accession No | Mw (kDa) | Peptide Count | GO Component                                                                                   | GO Function                                                                                                                                                                           | GO Process                                                                                                                                      |
|--------------------------------------------------------------|-----------|--------------|----------|---------------|------------------------------------------------------------------------------------------------|---------------------------------------------------------------------------------------------------------------------------------------------------------------------------------------|-------------------------------------------------------------------------------------------------------------------------------------------------|
| eukaryotic translation initiation factor 3, subunit 7 (zeta) | Eif3d     | NP_061219    | 64       | 2             | cytoplasm, eukaryotic translation initiation factor 3 complex                                  | translation initiation factor activity                                                                                                                                                | formation of translation initiation complex, translation, translational initiation                                                              |
| solute carrier family 4 (anion exchanger), member 4          | Slc4a4    | NP_061230    | 121      | 2             | integral to membrane, integral to plasma membrane, membrane, plasma membrane                   | anion exchanger activity, anion transmembrane transporter activity, inorganic anion exchanger activity, sodium ion binding, sodium:bicarbonate symporter activity, symporter activity | anion transport, bicarbonate transport, ion transport, regulation of pH, sodium ion transport, transport                                        |
| claudin 8                                                    | Cldn8     | NP_061248    | 25       | 2             | cell junction, integral to membrane, membrane, plasma membrane, tight junction                 | structural molecule activity                                                                                                                                                          | not classified                                                                                                                                  |
| formin binding protein 3                                     | Prpf40a   | NP_061255    | 108      | 2             | nucleus                                                                                        | protein binding                                                                                                                                                                       | mRNA processing, RNA splicing                                                                                                                   |
| eukaryotic translation elongation factor 1 beta 2            | Eef1b2    | NP_061266    | 25       | 2             | eukaryotic translation elongation factor 1 complex                                             | translation elongation factor activity                                                                                                                                                | translation, translational elongation                                                                                                           |
| eukaryotic translation initiation factor 3, subunit I        | Eif3i     | NP_061269    | 36       | 2             | cellular_component, cytoplasm, eukaryotic translation initiation factor 3 complex              | molecular_function, translation initiation factor activity                                                                                                                            | biological_process, translation, translational initiation                                                                                       |
| aldo-keto reductase family 1, member E1                      | Akr1e1    | NP_061347    | 34       | 2             | cytoplasm                                                                                      | 1,5-anhydro-D-fructose reductase activity, oxidoreductase activity                                                                                                                    | oxidation reduction                                                                                                                             |
| nucleolar protein 5                                          | Nol5      | NP_061356    | 60       | 2             | nucleolus, nucleus                                                                             | snoRNP binding                                                                                                                                                                        | ribosome biogenesis                                                                                                                             |
| fructose bisphosphatase 1                                    | Fbp1      | NP_062268    | 37       | 2             | not classified                                                                                 | fructose 1,6-bisphosphate 1-phosphatase activity, hydrolase activity, magnesium ion binding, metal ion binding, phosphoric ester hydrolase activity                                   | carbohydrate metabolic process, gluconeogenesis                                                                                                 |
| glucosamine-phosphate N-acetyltransferase 1                  | Gnpnat1   | NP_062298    | 21       | 2             | endosome, ER-Golgi intermediate compartment, Golgi apparatus, late endosome, membrane          | acyltransferase activity, glucosamine 6-phosphate N-acetyltransferase activity, N-acetyltransferase activity, transferase activity                                                    | metabolic process, UDP-N-acetylglucosamine biosynthetic process                                                                                 |
| NADH dehydrogenase (ubiquinone) 1 alpha subcomplex, 1        | Ndufa1    | NP_062316    | 8        | 2             | integral to membrane, membrane, mitochondrial inner membrane, mitochondrion, respiratory chain | not classified                                                                                                                                                                        | electron transport chain, transport                                                                                                             |
| polypyrimidine tract binding protein 2                       | Ptbp2     | NP_062423    | 58       | 2             | nucleus, spliceosomal complex                                                                  | mRNA binding, nucleic acid binding, nucleotide binding, protein binding, RNA binding                                                                                                  | mRNA processing, mRNA splice site selection, RNA splicing                                                                                       |
| methionine aminopeptidase 2                                  | Metap2    | NP_062622    | 53       | 2             | not classified                                                                                 | aminopeptidase activity, cobalt ion binding, hydrolase activity, metal ion binding, metalloexopeptidase activity, peptidase activity, protein binding                                 | cellular process, proteolysis                                                                                                                   |
| RuvB-like protein 1                                          | Ruvbl1    | NP_062659    | 50       | 2             | nucleus, ribonucleoprotein complex                                                             | ATP binding, DNA helicase activity, helicase activity, hydrolase activity, nucleoside-triphosphatase activity, nucleotide binding, protein binding                                    | cell cycle, cell division, chromatin modification, DNA recombination, mitosis, regulation of growth, regulation of transcription, transcription |
| HLA-B-associated transcript 1A                               | Bat1a     | NP_062667    | 49       | 2             | nucleus, spliceosomal complex                                                                  | ATP binding, ATP-dependent helicase activity, helicase activity, hydrolase activity, nucleic acid binding, nucleotide binding, RNA binding                                            | mRNA processing, RNA splicing                                                                                                                   |

| Protein Name                                                  | Gene Name | Accession No | Mw (kDa) | Peptide Count | GO Component                                                                                               | GO Function                                                                                                          | GO Process                                                                                                                                                             |
|---------------------------------------------------------------|-----------|--------------|----------|---------------|------------------------------------------------------------------------------------------------------------|----------------------------------------------------------------------------------------------------------------------|------------------------------------------------------------------------------------------------------------------------------------------------------------------------|
| SMC1 structural maintenance of chromosomes 1-like 1           | Smc1a     | NP_062684    | 143      | 2             | chromosome, nucleus                                                                                        | ATP binding, nucleotide binding, protein binding                                                                     | cell cycle, cell division, chromosome organization, DNA repair, meiosis, mitosis, response to DNA damage stimulus                                                      |
| APAF1 interacting protein                                     | Apip      | NP_062709    | 27       | 2             | cellular_component, cytoplasm                                                                              | metal ion binding, molecular_function, zinc ion binding                                                              | apoptosis, negative regulation of apoptosis                                                                                                                            |
| adhesion regulating molecule 1                                | Adrm1     | NP_062796    | 42       | 2             | cytoplasm, nucleus, proteasome complex                                                                     | not classified                                                                                                       | not classified                                                                                                                                                         |
| X-linked myotubular myopathy gene 1                           | Mtm1      | NP_064310    | 70       | 2             | not classified                                                                                             | hydrolase activity, phosphatase activity, phosphoprotein phosphatase activity, protein tyrosine phosphatase activity | dephosphorylation, muscle maintenance                                                                                                                                  |
| keratin 71                                                    | Krt71     | NP_064340    | 57       | 2             | intermediate filament, keratin filament                                                                    | structural constituent of cytoskeleton, structural molecule activity                                                 | cytoskeleton organization, hair follicle morphogenesis                                                                                                                 |
| histone cell cycle regulation defective interacting protein 5 | Nfu1      | NP_064429    | 22       | 2             | cytoplasm, cytosol, mitochondrion                                                                          | iron ion binding, iron-sulfur cluster binding, protein binding                                                       | biological_process, iron-sulfur cluster assembly                                                                                                                       |
| U2 small nuclear ribonucleoprotein B                          | Snrpb2    | NP_067310    | 25       | 2             | cellular_component, nucleus, ribonucleoprotein complex, spliceosomal complex                               | nucleic acid binding, nucleotide binding, protein binding, RNA binding                                               | biological_process, mRNA processing, RNA splicing                                                                                                                      |
| protein phosphatase 1, regulatory (inhibitor) subunit 1A      | Ppp1r1a   | NP_067366    | 19       | 2             | not classified                                                                                             | phosphoprotein phosphatase inhibitor activity, protein binding                                                       | carbohydrate metabolic process, glycogen metabolic process, signal transduction                                                                                        |
| carboxylesterase 1                                            | Ces1      | NP_067431    | 63       | 2             | endoplasmic reticulum                                                                                      | carboxylesterase activity, hydrolase activity                                                                        | not classified                                                                                                                                                         |
| heterogeneous nuclear ribonucleoprotein H1                    | Hnmp1     | NP_067485    | 49       | 2             | nucleus, ribonucleoprotein complex, spliceosomal complex                                                   | nucleic acid binding, nucleotide binding, protein binding, RNA binding                                               | mRNA processing, RNA splicing                                                                                                                                          |
| nicastrin                                                     | Ncstn     | NP_067620    | 78       | 2             | endoplasmic reticulum, Golgi apparatus, integral to membrane, membrane, membrane fraction, plasma membrane | protein binding                                                                                                      | Notch signaling pathway, protein processing                                                                                                                            |
| protein kinase, cAMP dependent regulatory, type I, alpha      | Prkar1a   | NP_068680    | 43       | 2             | cAMP-dependent protein kinase complex, cytoplasm, neuromuscular junction                                   | cAMP binding, cAMP-dependent protein kinase regulator activity, kinase activity, nucleotide binding, protein binding | cell proliferation, mesoderm formation, organ morphogenesis, protein amino acid phosphorylation, regulation of protein amino acid phosphorylation, signal transduction |
| acyl-CoA thioesterase 10                                      | Acot10    | NP_073727    | 51       | 2             | mitochondrion                                                                                              | acyl-CoA thioesterase activity, carboxylesterase activity, hydrolase activity                                        | acyl-CoA metabolic process                                                                                                                                             |
| ubiquitin-conjugating enzyme E2 variant 1                     | Ube2v1    | NP_075719    | 16       | 2             | nucleus                                                                                                    | protein binding, small conjugating protein ligase activity                                                           | modification-dependent protein catabolic process, post-translational protein modification, regulation of protein metabolic process                                     |
| mitochondrial ribosomal protein S34                           | Mrps34    | NP_075749    | 26       | 2             | cellular_component, mitochondrion, ribonucleoprotein complex, ribosome                                     | molecular_function                                                                                                   | biological_process                                                                                                                                                     |
| mitochondrial ribosomal protein L46                           | Mrpl46    | NP_075820    | 32       | 2             | mitochondrion, ribonucleoprotein complex, ribosome                                                         | not classified                                                                                                       | not classified                                                                                                                                                         |
| elaC homolog 2                                                | Elac2     | NP_075968    | 93       | 2             | nucleus                                                                                                    | endonuclease activity, hydrolase activity, metal ion binding, nuclease activity, zinc ion binding                    | tRNA processing                                                                                                                                                        |

| Protein Name                                                           | Gene Name      | Accession No | Mw (kDa) | Peptide Count | GO Component                                                                                                                                       | GO Function                                                                                                                      | GO Process                                                                                                           |
|------------------------------------------------------------------------|----------------|--------------|----------|---------------|----------------------------------------------------------------------------------------------------------------------------------------------------|----------------------------------------------------------------------------------------------------------------------------------|----------------------------------------------------------------------------------------------------------------------|
| seryl-aminoacyl-tRNA synthetase 2                                      | Sars2          | NP_076126    | 58       | 2             | cytoplasm, mitochondrion                                                                                                                           | aminoacyl-tRNA ligase activity, ATP binding, ligase activity, nucleotide binding, serine-tRNA ligase activity                    | seryl-tRNA aminoacylation, translation, tRNA aminoacylation for protein translation                                  |
| carnitine O-octanoyltransferase                                        | Crot           | NP_076222    | 70       | 2             | peroxisome                                                                                                                                         | acyltransferase activity, carnitine O-octanoyltransferase activity, transferase activity                                         | fatty acid metabolic process, fatty acid transport, lipid metabolic process, transport                               |
| toll interacting protein                                               | Tollip         | NP_076253    | 30       | 2             | cytoplasm                                                                                                                                          | protein binding                                                                                                                  | immune response, inflammatory response                                                                               |
| coiled-coil-helix-coiled-coil-helix domain containing 2                | Chchd2         | NP_077128    | 16       | 2             | mitochondrion                                                                                                                                      | molecular_function                                                                                                               | biological_process                                                                                                   |
| mitochondrial ribosomal protein S23                                    | Mrps23         | NP_077136    | 20       | 2             | mitochondrial small ribosomal subunit, mitochondrion, ribonucleoprotein complex, ribosome                                                          | structural constituent of ribosome                                                                                               | not classified                                                                                                       |
| ribosomal protein S23                                                  | Rps23          | NP_077137    | 16       | 2             | intracellular, ribonucleoprotein complex, ribosome, small ribosomal subunit                                                                        | structural constituent of ribosome                                                                                               | translation                                                                                                          |
| hypothetical protein LOC76916                                          | 4930455C21 Rik | NP_077235    | 32       | 2             | integral to membrane, membrane                                                                                                                     | not classified                                                                                                                   | not classified                                                                                                       |
| aldo-keto reductase family 7, member A5 (aflatoxin aldehyde reductase) | Akr7a5         | NP_079613    | 41       | 2             | Golgi apparatus, mitochondrion                                                                                                                     | oxidoreductase activity                                                                                                          | oxidation reduction                                                                                                  |
| ATPase, H+ transporting, lysosomal V1 subunit F                        | Atp6v1f        | NP_079657    | 13       | 2             | proton-transporting two-sector ATPase complex, catalytic domain, proton-transporting V-type ATPase, V1 domain                                      | hydrogen ion transporting ATP synthase activity, rotational mechanism, proton-transporting ATPase activity, rotational mechanism | ATP synthesis coupled proton transport, ion transport, proton transport, transport                                   |
| acylphosphatase 1, erythrocyte (common) type                           | Acyp1          | NP_079697    | 11       | 2             | not classified                                                                                                                                     | acylphosphatase activity, hydrolase activity                                                                                     | not classified                                                                                                       |
| serologically defined colon cancer antigen 1                           | Sdccag1        | NP_079717    | 121      | 2             | nucleus                                                                                                                                            | not classified                                                                                                                   | not classified                                                                                                       |
| mitochondrial ribosomal protein S15                                    | Mrps15         | NP_079820    | 29       | 2             | intracellular, mitochondrion, ribonucleoprotein complex, ribosome                                                                                  | structural constituent of ribosome                                                                                               | translation                                                                                                          |
| nipsnap homolog 3A                                                     | Nipsnap3a      | NP_079899    | 28       | 2             | cytoplasm, mitochondrion                                                                                                                           | not classified                                                                                                                   | not classified                                                                                                       |
| ubiquinol-cytochrome c reductase subunit                               | Uqcr           | NP_079926    | 7        | 2             | integral to membrane, membrane, mitochondrial inner membrane, mitochondrial membrane, mitochondrion, respiratory chain                             | electron carrier activity, ubiquinol-cytochrome-c reductase activity                                                             | biological_process, electron transport chain, mitochondrial electron transport, ubiquinol to cytochrome c, transport |
| tetratricopeptide repeat domain 35                                     | Ttc35          | NP_080012    | 35       | 2             | nucleus                                                                                                                                            | binding                                                                                                                          | not classified                                                                                                       |
| mannose-6-phosphate receptor binding protein 1                         | M6prbp1        | NP_080112    | 47       | 2             | cytoplasm, endosome, lipid particle, membrane                                                                                                      | not classified                                                                                                                   | transport                                                                                                            |
| CDGSH iron sulfur domain 2                                             | Cisd2          | NP_080178    | 15       | 2             | cytoplasmic part, endoplasmic reticulum, integral to membrane, intracellular membrane-bounded organelle, membrane, perinuclear region of cytoplasm | 2 iron, 2 sulfur cluster binding, iron ion binding, iron-sulfur cluster binding, metal ion binding, molecular_function           | biological_process                                                                                                   |
| mitochondrial ribosomal protein L10                                    | Mrpl10         | NP_080430    | 29       | 2             | mitochondrial large ribosomal subunit, mitochondrion, ribonucleoprotein complex, ribosome                                                          | structural constituent of ribosome                                                                                               | ribosome biogenesis                                                                                                  |
| all-trans-13,14-dihydroretinol saturase                                | Retsat         | NP_080435    | 67       | 2             | endoplasmic reticulum, endoplasmic reticulum membrane, membrane, nuclear outer membrane                                                            | all-trans-retinol 13,14-reductase activity, electron carrier activity, oxidoreductase activity                                   | oxidation reduction, retinol metabolic process                                                                       |
| solute carrier family 25, member 46                                    | Slc25a46       | NP_080441    | 46       | 2             | integral to membrane, membrane, mitochondrial inner membrane, mitochondrion                                                                        | not classified                                                                                                                   | transport                                                                                                            |

| Protein Name                                            | Gene Name     | Accession No | Mw (kDa) | Peptide Count | GO Component                                                             | GO Function                                                                                                                                                  | GO Process                                                                                                                                      |
|---------------------------------------------------------|---------------|--------------|----------|---------------|--------------------------------------------------------------------------|--------------------------------------------------------------------------------------------------------------------------------------------------------------|-------------------------------------------------------------------------------------------------------------------------------------------------|
| transcription elongation factor B (SIII), polypeptide 2 | Tceb2         | NP_080581    | 13       | 2             | nucleus                                                                  | protein binding                                                                                                                                              | modification-dependent protein catabolic process, regulation of transcription, transcription                                                    |
| methionine sulfoxide reductase A                        | Msra          | NP_080598    | 26       | 2             | cellular_component                                                       | oxidoreductase activity, oxidoreductase activity, acting on sulfur group of donors, disulfide as acceptor, peptide-methionine-(S)-S-oxide reductase activity | oxidation reduction, protein metabolic process                                                                                                  |
| U2-associated SR140 protein                             | 2610101N10Rik | NP_080752    | 113      | 2             | not classified                                                           | nucleic acid binding, nucleotide binding, RNA binding                                                                                                        | RNA processing                                                                                                                                  |
| thioredoxin domain containing 17                        | Txndc17       | NP_080835    | 14       | 2             | cellular_component, cytoplasm                                            | not classified                                                                                                                                               | biological_process, cell redox homeostasis                                                                                                      |
| NADH dehydrogenase (ubiquinone) 1 beta subcomplex, 2    | Ndufb2        | NP_080888    | 12       | 2             | membrane, mitochondrial inner membrane, mitochondrion, respiratory chain | not classified                                                                                                                                               | electron transport chain, transport                                                                                                             |
| TOE1 homolog                                            | Toe1          | NP_080930    | 57       | 2             | nucleus                                                                  | metal ion binding, nucleic acid binding, zinc ion binding                                                                                                    | not classified                                                                                                                                  |
| phosphoribosyl pyrophosphate synthetase 2               | Prps2         | NP_080938    | 35       | 2             | not classified                                                           | ATP binding, kinase activity, magnesium ion binding, metal ion binding, nucleotide binding, ribose phosphate diphosphokinase activity, transferase activity  | cellular biosynthetic process, nucleoside metabolic process, nucleotide biosynthetic process, ribonucleoside monophosphate biosynthetic process |
| vacuolar protein sorting 53                             | Vps53         | NP_080940    | 94       | 2             | endosome, Golgi apparatus, membrane                                      | not classified                                                                                                                                               | protein transport, transport                                                                                                                    |
| biliverdin reductase A                                  | Blvra         | NP_080954    | 34       | 2             | cytoplasm, soluble fraction                                              | biliverdin reductase activity, binding, catalytic activity, metal ion binding, nucleotide binding, oxidoreductase activity, zinc ion binding                 | heme catabolic process, metabolic process, oxidation reduction                                                                                  |
| RIKEN cDNA 1110007C09                                   | 1110007C09Rik | NP_081014    | 21       | 2             | intracellular, nucleus                                                   | protein binding                                                                                                                                              | regulation of apoptosis                                                                                                                         |
| RIKEN cDNA 1110007M04                                   | 1110007M04Rik | NP_081018    | 20       | 2             | mitochondrion                                                            | calmodulin binding                                                                                                                                           | not classified                                                                                                                                  |
| Ssu72 RNA polymerase II CTD phosphatase homolog         | Ssu72         | NP_081175    | 23       | 2             | cytoplasm, nucleus                                                       | hydrolase activity, phosphoprotein phosphatase activity                                                                                                      | mRNA processing                                                                                                                                 |
| hypothetical protein LOC69064                           | 1810014F10Rik | NP_081204    | 17       | 2             | not classified                                                           | fucose binding                                                                                                                                               | carbohydrate transport                                                                                                                          |
| OCIA domain containing 2                                | Ociad2        | NP_081226    | 17       | 2             | endosome, mitochondrial inner membrane, mitochondrion                    | not classified                                                                                                                                               | not classified                                                                                                                                  |
| hypothetical protein LOC69186                           | 1810027O10Rik | NP_081258    | 12       | 2             | integral to membrane, membrane, mitochondrial inner membrane             | not classified                                                                                                                                               | not classified                                                                                                                                  |
| translocation protein 1                                 | Sec62         | NP_081292    | 46       | 2             | endoplasmic reticulum, integral to membrane, membrane                    | protein transporter activity                                                                                                                                 | protein transport, transmembrane transport, transport                                                                                           |
| glyoxalase domain containing 5                          | Glod5         | NP_081503    | 17       | 2             | not classified                                                           | not classified                                                                                                                                               | not classified                                                                                                                                  |
| transcription factor MEL1                               | Prdm16        | NP_081780    | 141      | 2             | nucleus, transcriptional repressor complex                               | sequence-specific DNA binding, SMAD binding, transcription coactivator activity, transcription repressor activity                                            | brown fat cell differentiation, neurogenesis, regulation of cellular respiration, white fat cell differentiation                                |
| D-lactate dehydrogenase                                 | Ldhd          | NP_081846    | 52       | 2             | mitochondrion                                                            | catalytic activity, D-lactate dehydrogenase (cytochrome) activity, D-lactate dehydrogenase activity, FAD binding, oxidoreductase activity, protein binding   | ATP biosynthetic process, oxidation reduction                                                                                                   |

| Protein Name                                      | Gene Name      | Accession No | Mw (kDa) | Peptide Count | GO Component                                                                               | GO Function                                                                                                                                                                                                                                | GO Process                                                                                                                                                                                                                                                                                        |
|---------------------------------------------------|----------------|--------------|----------|---------------|--------------------------------------------------------------------------------------------|--------------------------------------------------------------------------------------------------------------------------------------------------------------------------------------------------------------------------------------------|---------------------------------------------------------------------------------------------------------------------------------------------------------------------------------------------------------------------------------------------------------------------------------------------------|
| threonine aldolase 1                              | Tha1           | NP_082195    | 21       | 2             | cellular_component                                                                         | not classified                                                                                                                                                                                                                             | biological_process                                                                                                                                                                                                                                                                                |
| Mak3p homolog                                     | Nat13          | NP_082384    | 19       | 2             | cytoplasm                                                                                  | acyltransferase activity, N-acetyltransferase activity, protein binding, transferase activity                                                                                                                                              | metabolic process, N-terminal protein amino acid acetylation                                                                                                                                                                                                                                      |
| furry homolog-like isoform 1                      | Fryl           | NP_082470    | 338      | 2             | cellular_component                                                                         | protein binding                                                                                                                                                                                                                            | biological_process                                                                                                                                                                                                                                                                                |
| phosphoglucomutase 3                              | Pgm3           | NP_082628    | 59       | 2             | not classified                                                                             | intramolecular transferase activity, phosphotransferases, isomerase activity, magnesium ion binding, metal ion binding, phosphoacetylglucosamine mutase activity, phosphoglucomutase activity                                              | carbohydrate metabolic process, embryonic development, glucose 1-phosphate metabolic process, hemopoiesis, spermatogenesis, UDP-N-acetylglucosamine biosynthetic process                                                                                                                          |
| glutaredoxin 5                                    | Glx5           | NP_082695    | 16       | 2             | mitochondrion                                                                              | electron carrier activity, protein disulfide oxidoreductase activity                                                                                                                                                                       | cell redox homeostasis                                                                                                                                                                                                                                                                            |
| transmembrane 9 superfamily member 1              | Tm9sf1         | NP_083056    | 69       | 2             | integral to membrane, membrane                                                             | not classified                                                                                                                                                                                                                             | not classified                                                                                                                                                                                                                                                                                    |
| raptor                                            | 4932417H02 Rik | NP_083174    | 149      | 2             | TORC1 complex                                                                              | binding, protein binding                                                                                                                                                                                                                   | not classified                                                                                                                                                                                                                                                                                    |
| HEAT-like repeat-containing protein               | 8430415E04 Rik | NP_083256    | 99       | 2             | cytoplasm                                                                                  | binding                                                                                                                                                                                                                                    | not classified                                                                                                                                                                                                                                                                                    |
| mitochondrial phosphoenolpyruvate carboxykinase 2 | Pck2           | NP_083270    | 73       | 2             | mitochondrion                                                                              | carboxy-lyase activity, GTP binding, lyase activity, manganese ion binding, metal ion binding, nucleotide binding, phosphoenolpyruvate carboxykinase (GTP) activity, phosphoenolpyruvate carboxykinase activity, purine nucleotide binding | gluconeogenesis                                                                                                                                                                                                                                                                                   |
| proline-, glutamic acid-, leucine-rich protein 1  | Pelp1          | NP_083507    | 118      | 2             | cytoplasm, nucleus                                                                         | not classified                                                                                                                                                                                                                             | transcription                                                                                                                                                                                                                                                                                     |
| phosphohistidine phosphatase                      | Phpt1          | NP_083569    | 14       | 2             | cytoplasm                                                                                  | hydrolase activity, phosphoprotein phosphatase activity                                                                                                                                                                                    | not classified                                                                                                                                                                                                                                                                                    |
| phosphoribosyl pyrophosphate synthetase 1-like 1  | Prps11         | NP_083570    | 35       | 2             | not classified                                                                             | kinase activity, magnesium ion binding, metal ion binding, ribose phosphate diphosphokinase activity                                                                                                                                       | nucleotide biosynthetic process                                                                                                                                                                                                                                                                   |
| signal peptidase complex subunit 3                | Spcs3          | NP_083977    | 20       | 2             | not classified                                                                             | not classified                                                                                                                                                                                                                             | not classified                                                                                                                                                                                                                                                                                    |
| dynein cytoplasmic 2 heavy chain 1                | Dync2h1        | NP_084127    | 492      | 2             | cell projection, cilium, cytoplasm, dynein complex, membrane, microtubule, plasma membrane | ATP binding, ATPase activity, microtubule motor activity, motor activity, nucleoside-triphosphatase activity, nucleotide binding                                                                                                           | asymmetric protein localization, cell projection organization, cilium assembly, determination of left/right symmetry, dorsal/ventral pattern formation, embryonic limb morphogenesis, forebrain development, microtubule-based movement, multicellular organismal development, protein processing |
| aldo-keto reductase family 1, member C21          | Akr1c21        | NP_084177    | 37       | 2             | cellular_component, cytoplasm                                                              | aldo-keto reductase activity, oxidoreductase activity                                                                                                                                                                                      | lipid metabolic process, oxidation reduction, steroid biosynthetic process, steroid metabolic process                                                                                                                                                                                             |
| apurinic/aprimidinic endonuclease 2               | Apex2          | NP_084219    | 57       | 2             | intracellular, mitochondrial inner membrane, mitochondrion, nucleus                        | DNA binding, DNA-(apurinic or apyrimidinic site) lyase activity, endonuclease activity, lyase activity, nuclease activity, zinc ion binding                                                                                                | DNA repair, response to DNA damage stimulus                                                                                                                                                                                                                                                       |
| coiled-coil domain containing 93 isoform c        | Ccdc93         | NP_084231    | 72       | 2             | not classified                                                                             | not classified                                                                                                                                                                                                                             | not classified                                                                                                                                                                                                                                                                                    |

| Protein Name                                  | Gene Name | Accession No | Mw (kDa) | Peptide Count | GO Component                                                                                                                | GO Function                                                                                                                                                                                 | GO Process                                                                                                                                                                                                                                                                                                           |
|-----------------------------------------------|-----------|--------------|----------|---------------|-----------------------------------------------------------------------------------------------------------------------------|---------------------------------------------------------------------------------------------------------------------------------------------------------------------------------------------|----------------------------------------------------------------------------------------------------------------------------------------------------------------------------------------------------------------------------------------------------------------------------------------------------------------------|
| crystallin, lambda 1                          | Cryl1     | NP_084280    | 35       | 2             | not classified                                                                                                              | binding, catalytic activity, L-gulonate 3-dehydrogenase activity, oxidoreductase activity                                                                                                   | fatty acid metabolic process, metabolic process, oxidation reduction                                                                                                                                                                                                                                                 |
| neurobeachin                                  | Nbea      | NP_085098    | 327      | 2             | cell junction, cytosol, endomembrane system, membrane, plasma membrane, postsynaptic membrane, synapse, trans-Golgi network | protein kinase A binding, protein kinase binding                                                                                                                                            | post-Golgi vesicle-mediated transport, protein localization, protein targeting                                                                                                                                                                                                                                       |
| ankycorbin                                    | Rai14     | NP_109615    | 109      | 2             | cytoplasm, cytoskeleton, mitochondrion                                                                                      | not classified                                                                                                                                                                              | not classified                                                                                                                                                                                                                                                                                                       |
| endoplasmic reticulum aminopeptidase 1        | Erap1     | NP_109636    | 107      | 2             | cytoplasm, endoplasmic reticulum, integral to membrane, membrane                                                            | aminopeptidase activity, hydrolase activity, metal ion binding, metalloproteinase activity, peptidase activity, receptor activity, zinc ion binding                                         | immune response, positive regulation of angiogenesis, proteolysis                                                                                                                                                                                                                                                    |
| insulin degrading enzyme                      | Ide       | NP_112419    | 118      | 2             | cytoplasm                                                                                                                   | ATP binding, catalytic activity, hydrolase activity, metal ion binding, metalloendopeptidase activity, metalloproteinase activity, nucleotide binding, peptidase activity, zinc ion binding | proteolysis                                                                                                                                                                                                                                                                                                          |
| testis specific gene A14                      | Tsga14    | NP_114387    | 41       | 2             | not classified                                                                                                              | not classified                                                                                                                                                                              | not classified                                                                                                                                                                                                                                                                                                       |
| D-glucuronyl C5-epimerase                     | Glce      | NP_201577    | 70       | 2             | Golgi apparatus, integral to membrane, membrane                                                                             | isomerase activity, racemase and epimerase activity, acting on carbohydrates and derivatives, UDP-glucuronate 5'-epimerase activity                                                         | glycosaminoglycan biosynthetic process, heparan sulfate proteoglycan biosynthetic process, heparin biosynthetic process                                                                                                                                                                                              |
| AF4/FMR2 family, member 4                     | Aff4      | NP_291043    | 127      | 2             | nucleus                                                                                                                     | molecular_function                                                                                                                                                                          | regulation of transcription, spermatid development, transcription                                                                                                                                                                                                                                                    |
| glutaredoxin                                  | Glrx      | NP_444338    | 12       | 2             | cytoplasm                                                                                                                   | electron carrier activity, protein disulfide oxidoreductase activity, protein-disulfide reductase (glutathione) activity                                                                    | cell redox homeostasis, electron transport chain, transport                                                                                                                                                                                                                                                          |
| dehydrogenase/reductase (SDR family) member 8 | Hsd17b11  | NP_444492    | 33       | 2             | cytoplasm, extracellular region                                                                                             | binding, catalytic activity, estradiol 17-beta-dehydrogenase activity, oxidoreductase activity                                                                                              | lipid biosynthetic process, metabolic process, oxidation reduction, steroid biosynthetic process                                                                                                                                                                                                                     |
| PRKC, apoptosis, WT1, regulator               | Pawr      | NP_473397    | 36       | 2             | cytoplasm, nucleus                                                                                                          | protein binding                                                                                                                                                                             | apoptosis, interleukin-2 biosynthetic process, negative regulation of B cell proliferation, negative regulation of T cell proliferation, negative regulation of T cell receptor signaling pathway, positive regulation of amyloid precursor protein biosynthetic process, regulation of transcription, transcription |
| proline synthetase co-transcribed isoform a   | Prosc     | NP_473398    | 30       | 2             | cellular_component                                                                                                          | molecular_function                                                                                                                                                                          | biological_process                                                                                                                                                                                                                                                                                                   |

| Protein Name                                              | Gene Name      | Accession No | Mw (kDa) | Peptide Count | GO Component                                                                                                                                           | GO Function                                                                                                                                                                                                                     | GO Process                                                                                                                                                                          |
|-----------------------------------------------------------|----------------|--------------|----------|---------------|--------------------------------------------------------------------------------------------------------------------------------------------------------|---------------------------------------------------------------------------------------------------------------------------------------------------------------------------------------------------------------------------------|-------------------------------------------------------------------------------------------------------------------------------------------------------------------------------------|
| phosphatidylinositol-5-phosphate 4-kinase, type II, gamma | Pip4k2c        | NP_473438    | 47       | 2             | cytoplasm, membrane                                                                                                                                    | 1-phosphatidylinositol-5-phosphate 4-kinase activity, ATP binding, kinase activity, nucleotide binding, phosphatidylinositol phosphate kinase activity, transferase activity                                                    | phosphatidylinositol metabolic process                                                                                                                                              |
| SH3 domain binding glutamic acid-rich protein-like 3      | Sh3bgrl3       | NP_542126    | 10       | 2             | cytoplasm, nucleus                                                                                                                                     | electron carrier activity, protein disulfide oxidoreductase activity                                                                                                                                                            | cell redox homeostasis                                                                                                                                                              |
| acetyl-Coenzyme A acyltransferase 1                       | Acaa1a         | NP_570934    | 44       | 2             | peroxisome                                                                                                                                             | acetyl-CoA C-acetyltransferase activity, acetyl-CoA C-acyltransferase activity, acyltransferase activity, catalytic activity, transferase activity, transferase activity, transferring acyl groups other than amino-acyl groups | fatty acid metabolic process, lipid metabolic process, metabolic process                                                                                                            |
| nucleoporin 155                                           | Nup155         | NP_573490    | 155      | 2             | membrane, nuclear pore, nucleus                                                                                                                        | structural constituent of nuclear pore                                                                                                                                                                                          | mRNA transport, nucleocytoplasmic transport, protein transport, transmembrane transport, transport                                                                                  |
| RNA binding motif protein 39                              | Rbm39          | NP_573505    | 59       | 2             | nucleus                                                                                                                                                | nucleic acid binding, nucleotide binding, protein binding, RNA binding, transcription coactivator activity                                                                                                                      | mRNA processing, regulation of transcription, RNA splicing, transcription                                                                                                           |
| leucine rich repeat containing 59                         | Lrrc59         | NP_598568    | 35       | 2             | endoplasmic reticulum, integral to membrane, membrane, microsome                                                                                       | protein binding                                                                                                                                                                                                                 | not classified                                                                                                                                                                      |
| dystonin isoform a                                        | Dst            | NP_598594    | 615      | 2             | actin cytoskeleton, cytoplasm, cytoplasmic membrane-bounded vesicle, cytoskeleton, hemidesmosome, microtubule cytoskeleton, neurofilament cytoskeleton | actin binding, calcium ion binding, microtubule binding, protein binding                                                                                                                                                        | axonogenesis, cell adhesion, cell cycle arrest, cytoplasmic microtubule organization, regulation of microtubule polymerization or depolymerization, retrograde axon cargo transport |
| hypothetical protein LOC75007                             | 4930504E06 Rik | NP_598619    | 50       | 2             | cellular_component                                                                                                                                     | molecular_function                                                                                                                                                                                                              | biological_process                                                                                                                                                                  |
| syntaxin 12                                               | Stx12          | NP_598648    | 31       | 2             | Golgi apparatus, integral to membrane, membrane                                                                                                        | protein binding, SNAP receptor activity                                                                                                                                                                                         | intracellular protein transport, protein transport, transport                                                                                                                       |
| nicalin homolog                                           | Ncln           | NP_598770    | 63       | 2             | endoplasmic reticulum, integral to membrane, membrane                                                                                                  | not classified                                                                                                                                                                                                                  | not classified                                                                                                                                                                      |
| pelota homolog                                            | Pelo           | NP_598819    | 43       | 2             | cellular_component, cytoplasm, nucleus                                                                                                                 | endonuclease activity, hydrolase activity, metal ion binding, molecular_function, nuclease activity                                                                                                                             | cell cycle, cell division, cell proliferation, chromosome organization, translation                                                                                                 |
| adenosine kinase                                          | Adk            | NP_598840    | 40       | 2             | cytosol, nucleus                                                                                                                                       | adenosine kinase activity, ATP binding, kinase activity, magnesium ion binding, metal ion binding, nucleotide binding, transferase activity                                                                                     | dATP biosynthetic process, purine ribonucleoside salvage                                                                                                                            |
| peptidylprolyl isomerase F                                | Ppif           | NP_598845    | 22       | 2             | mitochondrion                                                                                                                                          | isomerase activity, peptide binding, peptidylprolyl cis-trans isomerase activity                                                                                                                                                | protein folding                                                                                                                                                                     |
| tyrosyl-tRNA synthetase                                   | Yars           | NP_598912    | 59       | 2             | cytoplasm                                                                                                                                              | aminoacyl-tRNA ligase activity, ATP binding, ligase activity, nucleotide binding, RNA binding, tRNA binding, tyrosine-tRNA ligase activity                                                                                      | translation, tRNA aminoacylation for protein translation, tyrosyl-tRNA aminoacylation                                                                                               |

| Protein Name                                                                     | Gene Name | Accession No | Mw (kDa) | Peptide Count | GO Component                                                                | GO Function                                                                                                                                                                                            | GO Process                                                                                                                                                       |
|----------------------------------------------------------------------------------|-----------|--------------|----------|---------------|-----------------------------------------------------------------------------|--------------------------------------------------------------------------------------------------------------------------------------------------------------------------------------------------------|------------------------------------------------------------------------------------------------------------------------------------------------------------------|
| pyrroline-5-carboxylate reductase 1                                              | Pycr1     | NP_659044    | 32       | 2             | mitochondrion                                                               | binding, catalytic activity, oxidoreductase activity, pyrroline-5-carboxylate reductase activity                                                                                                       | cellular amino acid biosynthetic process, metabolic process, oxidation reduction, proline biosynthetic process                                                   |
| TAO kinase 1                                                                     | Taok1     | NP_659074    | 116      | 2             | cytoplasm                                                                   | ATP binding, kinase activity, nucleotide binding, protein kinase activity, protein serine/threonine kinase activity, transferase activity                                                              | protein amino acid phosphorylation                                                                                                                               |
| ubiquitin-conjugating enzyme E2E 2 (UBC4/5 homolog, yeast)                       | Ube2e2    | NP_659088    | 22       | 2             | not classified                                                              | ATP binding, ligase activity, nucleotide binding, small conjugating protein ligase activity, ubiquitin-protein ligase activity                                                                         | modification-dependent protein catabolic process, post-translational protein modification, regulation of protein metabolic process                               |
| COX15 homolog                                                                    | Cox15     | NP_659123    | 46       | 2             | integral to membrane, membrane, mitochondrial inner membrane, mitochondrion | molecular_function                                                                                                                                                                                     | protein complex assembly                                                                                                                                         |
| acyl-CoA synthetase family member 3                                              | Acsf3     | NP_659181    | 65       | 2             | mitochondrion                                                               | ATP binding, catalytic activity, ligase activity, nucleotide binding                                                                                                                                   | fatty acid metabolic process, lipid metabolic process, metabolic process                                                                                         |
| abhydrolase domain containing 11                                                 | Abhd11    | NP_660250    | 34       | 2             | cellular_component                                                          | catalytic activity, hydrolase activity                                                                                                                                                                 | biological_process                                                                                                                                               |
| thioredoxin domain containing 5                                                  | Txndc5    | NP_663342    | 46       | 2             | endoplasmic reticulum, endoplasmic reticulum lumen                          | isomerase activity                                                                                                                                                                                     | cell redox homeostasis                                                                                                                                           |
| S-adenosylhomocysteine hydrolase-like 1                                          | Ahcy1     | NP_663517    | 59       | 2             | cellular_component, endoplasmic reticulum                                   | adenosylhomocysteinase activity, hydrolase activity                                                                                                                                                    | one-carbon metabolic process                                                                                                                                     |
| ubiquitin-conjugating enzyme E2M                                                 | Ube2m     | NP_663553    | 21       | 2             | not classified                                                              | acid-amino acid ligase activity, ATP binding, ligase activity, nucleotide binding, small conjugating protein ligase activity                                                                           | modification-dependent protein catabolic process, post-translational protein modification, protein modification process, regulation of protein metabolic process |
| pyruvate dehydrogenase kinase, isoenzyme 3                                       | Pdk3      | NP_663605    | 48       | 2             | mitochondrion                                                               | ATP binding, kinase activity, nucleotide binding, protein histidine kinase activity, pyruvate dehydrogenase (acetyl-transferring) kinase activity, transferase activity, two-component sensor activity | carbohydrate metabolic process, glucose metabolic process, peptidyl-histidine phosphorylation, signal transduction                                               |
| TAF6-like RNA polymerase II, p300/CBP-associated factor (PCAF)-associated factor | Taf6l     | NP_666204    | 67       | 2             | nucleus                                                                     | DNA binding, RNA polymerase II transcription factor activity, transcription initiation factor activity                                                                                                 | regulation of transcription, regulation of transcription factor activity, transcription, transcription initiation                                                |
| ARP1 actin-related protein 1 homolog B                                           | Actr1b    | NP_666219    | 42       | 2             | cytoplasm, cytoskeleton                                                     | ATP binding, nucleotide binding, protein binding                                                                                                                                                       | not classified                                                                                                                                                   |
| Rho GTPase activating protein 1                                                  | Arhgap1   | NP_666236    | 50       | 2             | cell leading edge, cytoplasm, intracellular, plasma membrane, ruffle        | GTPase activator activity, protein binding, Rac GTPase activator activity, Rho GTPase activator activity, SH3 domain binding                                                                           | regulation of GTPase activity, signal transduction, small GTPase mediated signal transduction                                                                    |



| Protein Name                               | Gene Name | Accession No | Mw (kDa) | Peptide Count | GO Component                                                                                              | GO Function                                                                                                                                                                                                                              | GO Process                                                                                                                                                                                                                                                                                                                                                                                                                    |
|--------------------------------------------|-----------|--------------|----------|---------------|-----------------------------------------------------------------------------------------------------------|------------------------------------------------------------------------------------------------------------------------------------------------------------------------------------------------------------------------------------------|-------------------------------------------------------------------------------------------------------------------------------------------------------------------------------------------------------------------------------------------------------------------------------------------------------------------------------------------------------------------------------------------------------------------------------|
| alanyl-tRNA synthetase                     | Aars      | NP_666329    | 107      | 2             | cellular_component, cytoplasm                                                                             | alanine-tRNA ligase activity, aminoacyl-tRNA ligase activity, ATP binding, ligase activity, ligase activity, forming aminoacyl-tRNA and related compounds, nucleic acid binding, nucleotide binding                                      | alanyl-tRNA aminoacylation, cellular response to unfolded protein, cerebellar Purkinje cell layer development, endoplasmic reticulum unfolded protein response, hair follicle development, negative regulation of neuron apoptosis, neuromuscular process, neuromuscular process controlling balance, protein folding, response to amino acid stimulus, skin development, translation, tRNA aminoacylation, tRNA modification |
| brain glycogen phosphorylase               | Pygb      | NP_722476    | 97       | 2             | axon                                                                                                      | phosphorylase activity, pyridoxal phosphate binding, transferase activity, transferase activity, transferring glycosyl groups                                                                                                            | carbohydrate metabolic process, glycogen metabolic process                                                                                                                                                                                                                                                                                                                                                                    |
| isoleucyl-tRNA synthetase                  | Iars      | NP_742012    | 144      | 2             | cytoplasm                                                                                                 | aminoacyl-tRNA ligase activity, ATP binding, isoleucine-tRNA ligase activity, ligase activity, nucleotide binding, zinc ion binding                                                                                                      | isoleucyl-tRNA aminoacylation, translation, tRNA aminoacylation for protein translation                                                                                                                                                                                                                                                                                                                                       |
| Parkinson disease 7 domain containing 1    | Pddc1     | NP_742114    | 23       | 2             | extracellular region                                                                                      | not classified                                                                                                                                                                                                                           | not classified                                                                                                                                                                                                                                                                                                                                                                                                                |
| ciliary rootlet coiled-coil, rootletin     | Crocc     | NP_742120    | 227      | 2             | centriole, ciliary rootlet                                                                                | kinesin binding, structural molecule activity                                                                                                                                                                                            | cell cycle, cell projection organization                                                                                                                                                                                                                                                                                                                                                                                      |
| coenzyme Q6 homolog                        | Coq6      | NP_766170    | 51       | 2             | not classified                                                                                            | FAD binding, monooxygenase activity, oxidoreductase activity, oxidoreductase activity, acting on paired donors, with incorporation or reduction of molecular oxygen, NADH or NADPH as one donor, and incorporation of one atom of oxygen | metabolic process, oxidation reduction, ubiquinone biosynthetic process                                                                                                                                                                                                                                                                                                                                                       |
| pyruvate dehydrogenase kinase, isoenzyme 1 | Pdk1      | NP_766253    | 49       | 2             | mitochondrion, plasma membrane                                                                            | ATP binding, kinase activity, nucleotide binding, protein binding, protein histidine kinase activity, pyruvate dehydrogenase (acetyl-transferring) kinase activity, transferase activity, two-component sensor activity                  | carbohydrate metabolic process, glucose metabolic process, intracellular signaling cascade, peptidyl-histidine phosphorylation, signal transduction                                                                                                                                                                                                                                                                           |
| zinc finger, C3HC type 1                   | Zc3hc1    | NP_766323    | 53       | 2             | nucleus                                                                                                   | metal ion binding, protein binding, zinc ion binding                                                                                                                                                                                     | anti-apoptosis, cell cycle, cell division, mitosis, modification-dependent protein catabolic process                                                                                                                                                                                                                                                                                                                          |
| amine oxidase (flavin-containing)          | Maob      | NP_766366    | 59       | 2             | integral to membrane, membrane, mitochondrial inner membrane, mitochondrial outer membrane, mitochondrion | amine oxidase activity, electron carrier activity, oxidoreductase activity                                                                                                                                                               | oxidation reduction                                                                                                                                                                                                                                                                                                                                                                                                           |

| Protein Name                                                      | Gene Name      | Accession No | Mw (kDa) | Peptide Count | GO Component                                                                                                                            | GO Function                                                                                                                                                                    | GO Process                                                                                                                                                                                                  |
|-------------------------------------------------------------------|----------------|--------------|----------|---------------|-----------------------------------------------------------------------------------------------------------------------------------------|--------------------------------------------------------------------------------------------------------------------------------------------------------------------------------|-------------------------------------------------------------------------------------------------------------------------------------------------------------------------------------------------------------|
| inositol hexaphosphate kinase 3                                   | Ihpk3          | NP_766615    | 44       | 2             | cytoplasm, nucleus                                                                                                                      | ATP binding, inositol trisphosphate 3-kinase activity, kinase activity, nucleotide binding, transferase activity                                                               | not classified                                                                                                                                                                                              |
| 3-hydroxymethyl-3-methylglutaryl-Coenzyme A lyase-like 1          | Hmgcl1         | NP_776092    | 37       | 2             | not classified                                                                                                                          | catalytic activity, hydroxymethylglutaryl-CoA lyase activity, lyase activity, metal ion binding                                                                                | metabolic process                                                                                                                                                                                           |
| valyl-tRNA synthetase 2-like                                      | Vars2          | NP_780346    | 118      | 2             | cytoplasm, mitochondrion                                                                                                                | aminoacyl-tRNA ligase activity, ATP binding, ligase activity, nucleotide binding, valine-tRNA ligase activity                                                                  | translation, tRNA aminoacylation for protein translation, valyl-tRNA aminoacylation                                                                                                                         |
| centlein isoform 1                                                | Cntln          | NP_780484    | 161      | 2             | not classified                                                                                                                          | not classified                                                                                                                                                                 | not classified                                                                                                                                                                                              |
| retinol dehydrogenase 13 (all-trans and 9-cis)                    | Rdh13          | NP_780581    | 36       | 2             | not classified                                                                                                                          | oxidoreductase activity                                                                                                                                                        | metabolic process, oxidation reduction                                                                                                                                                                      |
| ATPase, H+ transporting, V0 subunit D isoform 2                   | Atp6v0d2       | NP_780615    | 40       | 2             | early endosome, proton-transporting two-sector ATPase complex, proton-transporting domain, proton-transporting V-type ATPase, V0 domain | hydrogen ion transmembrane transporter activity                                                                                                                                | ATP synthesis coupled proton transport, ion transport, proton transport, transport                                                                                                                          |
| RAB5B, member RAS oncogene family                                 | Rab5b          | NP_803130    | 24       | 2             | endocytic vesicle, endosome, membrane, plasma membrane                                                                                  | GTP binding, GTPase activity, nucleotide binding                                                                                                                               | endosome organization, protein transport, regulation of endocytosis, small GTPase mediated signal transduction, transport                                                                                   |
| transmembrane protein 16J                                         | Tmem16j        | NP_848468    | 87       | 2             | not classified                                                                                                                          | not classified                                                                                                                                                                 | not classified                                                                                                                                                                                              |
| arylacetamide deacetylase-like 1                                  | Aadacl1        | NP_848887    | 46       | 2             | endoplasmic reticulum, integral to membrane, membrane, microsome                                                                        | carboxylesterase activity, hydrolase activity, phosphate binding, serine hydrolase activity                                                                                    | lipid catabolic process, metabolic process, protein amino acid dephosphorylation, xenobiotic metabolic process                                                                                              |
| tetratricopeptide repeat domain 15                                | Ttc15          | NP_848926    | 88       | 2             | not classified                                                                                                                          | binding                                                                                                                                                                        | not classified                                                                                                                                                                                              |
| sirtuin 5 (silent mating type information regulation 2 homolog) 5 | Sirt5          | NP_849179    | 34       | 2             | not classified                                                                                                                          | hydrolase activity, hydrolase activity, acting on carbon-nitrogen (but not peptide) bonds, in linear amides, metal ion binding, NAD binding, protein binding, zinc ion binding | chromatin silencing, protein amino acid deacetylation, regulation of transcription                                                                                                                          |
| myosin IE                                                         | Myo1e          | NP_851417    | 127      | 2             | cellular_component, myosin complex                                                                                                      | ATP binding, molecular_function, motor activity, nucleotide binding                                                                                                            | hemopoiesis, in utero embryonic development, kidney development, nitrogen compound metabolic process, platelet-derived growth factor receptor signaling pathway, post-embryonic hemopoiesis, vasculogenesis |
| hypothetical protein LOC231293                                    | C130090K23 Rik | NP_851840    | 78       | 2             | integral to membrane, membrane                                                                                                          | not classified                                                                                                                                                                 | GPI anchor biosynthetic process                                                                                                                                                                             |
| NADH dehydrogenase subunit 2                                      | ND2            | NP_904329    | 39       | 2             | integral to membrane, membrane, mitochondrial inner membrane, mitochondrion, respiratory chain                                          | NADH dehydrogenase (ubiquinone) activity, oxidoreductase activity                                                                                                              | electron transport chain, oxidation reduction, oxygen and reactive oxygen species metabolic process, transport                                                                                              |
| strawberry notch homolog                                          | Sbno2          | NP_906271    | 149      | 2             | not classified                                                                                                                          | transcription repressor activity                                                                                                                                               | macrophage activation during immune response, negative regulation of transcription, DNA-dependent, regulation of inflammatory response, regulation of transcription, transcription                          |

| Protein Name                                                 | Gene Name    | Accession No | Mw (kDa) | Peptide Count | GO Component                                                        | GO Function                                                                                                                                                                                                                          | GO Process                                                                                                                                                                                                                                                                                                                                                                                                                                                                                                                                                                                       |
|--------------------------------------------------------------|--------------|--------------|----------|---------------|---------------------------------------------------------------------|--------------------------------------------------------------------------------------------------------------------------------------------------------------------------------------------------------------------------------------|--------------------------------------------------------------------------------------------------------------------------------------------------------------------------------------------------------------------------------------------------------------------------------------------------------------------------------------------------------------------------------------------------------------------------------------------------------------------------------------------------------------------------------------------------------------------------------------------------|
| cyclin-dependent kinase (CDC2-like) 11                       | Cdc26        | NP_937807    | 52       | 2             | not classified                                                      | ATP binding, cyclin-dependent protein kinase activity, kinase activity, nucleotide binding, protein kinase activity, protein serine/threonine kinase activity, transferase activity                                                  | cell division, protein amino acid phosphorylation                                                                                                                                                                                                                                                                                                                                                                                                                                                                                                                                                |
| tripartite motif-containing 56                               | Trim56       | NP_958761    | 80       | 2             | intracellular                                                       | metal ion binding, protein binding, zinc ion binding                                                                                                                                                                                 | not classified                                                                                                                                                                                                                                                                                                                                                                                                                                                                                                                                                                                   |
| LIM domain only 7                                            | Lmo7         | NP_963287    | 193      | 2             | apical plasma membrane cell-cell adherens junction                  | actinin binding, metal ion binding, zinc ion binding                                                                                                                                                                                 | cell-cell adhesion                                                                                                                                                                                                                                                                                                                                                                                                                                                                                                                                                                               |
| H2A histone family, member Y2                                | H2afy2       | NP_996883    | 40       | 2             | Barr body, chromosome, nucleosome, nucleus                          | DNA binding                                                                                                                                                                                                                          | chromatin modification, dosage compensation, nucleosome assembly                                                                                                                                                                                                                                                                                                                                                                                                                                                                                                                                 |
| mitochondrial ribosomal protein S26                          | Mrps26       | NP_997090    | 23       | 2             | mitochondrion, ribonucleoprotein complex, ribosome                  | not classified                                                                                                                                                                                                                       | not classified                                                                                                                                                                                                                                                                                                                                                                                                                                                                                                                                                                                   |
| pam, highwire, rpm 1                                         | Mycbp2       | NP_997098    | 521      | 2             | anaphase-promoting complex, axon, microtubule cytoskeleton, nucleus | ligase activity, metal ion binding, protein binding, protein homodimerization activity, zinc ion binding                                                                                                                             | branchiomotor neuron axon guidance, cell morphogenesis involved in neuron differentiation, central nervous system projection neuron axonogenesis, modification-dependent protein catabolic process, motor axon guidance, regulation of cytoskeleton organization, regulation of mitotic metaphase/anaphase transition, regulation of protein localization, regulation of transcription, transcription                                                                                                                                                                                            |
| signal transducer and activator of transcription 3 isoform 2 | Stat3        | NP_998825    | 88       | 2             | cytoplasm, nucleus, plasma membrane                                 | calcium ion binding, DNA binding, protein binding, protein dimerization activity, protein kinase binding, sequence-specific DNA binding, signal transducer activity, transcription activator activity, transcription factor activity | acute-phase response, cytokine-mediated signaling pathway, eating behavior, eye photoreceptor cell differentiation, glucose homeostasis, JAK-STAT cascade involved in growth hormone signaling pathway, positive regulation of transcription from RNA polymerase II promoter, regulation of multicellular organism growth, regulation of transcription, regulation of transcription from RNA polymerase II promoter, regulation of transcription, DNA-dependent, sexual reproduction, signal transduction, temperature homeostasis, transcription, transcription from RNA polymerase II promoter |
| PREDICTED: hypothetical protein                              | LOC668408    | XP_001001317 | 22       | 2             | not classified                                                      | not classified                                                                                                                                                                                                                       | not classified                                                                                                                                                                                                                                                                                                                                                                                                                                                                                                                                                                                   |
| PREDICTED: similar to S-adenosylhomocysteine hydrolase       | LOC677344    | XP_001002625 | 23       | 2             | not classified                                                      | not classified                                                                                                                                                                                                                       | not classified                                                                                                                                                                                                                                                                                                                                                                                                                                                                                                                                                                                   |
| PREDICTED: hypothetical protein                              | EG665937     | XP_001471658 | 21       | 2             | not classified                                                      | not classified                                                                                                                                                                                                                       | not classified                                                                                                                                                                                                                                                                                                                                                                                                                                                                                                                                                                                   |
| PREDICTED: similar to ribosomal protein L19                  | LOC100045367 | XP_001472655 | 15       | 2             | not classified                                                      | not classified                                                                                                                                                                                                                       | not classified                                                                                                                                                                                                                                                                                                                                                                                                                                                                                                                                                                                   |
| PREDICTED: hypothetical protein                              | LOC100039525 | XP_001473106 | 18       | 2             | not classified                                                      | not classified                                                                                                                                                                                                                       | not classified                                                                                                                                                                                                                                                                                                                                                                                                                                                                                                                                                                                   |

| Protein Name                                                                                                         | Gene Name     | Accession No | Mw (kDa) | Peptide Count | GO Component                                                     | GO Function                                                                                                                                                                                                                                                                                 | GO Process                                                                                                                                |
|----------------------------------------------------------------------------------------------------------------------|---------------|--------------|----------|---------------|------------------------------------------------------------------|---------------------------------------------------------------------------------------------------------------------------------------------------------------------------------------------------------------------------------------------------------------------------------------------|-------------------------------------------------------------------------------------------------------------------------------------------|
| PREDICTED: similar to ribosomal protein L3 isoform 3                                                                 | LOC100045885  | XP_001474762 | 40       | 2             | not classified                                                   | not classified                                                                                                                                                                                                                                                                              | not classified                                                                                                                            |
| PREDICTED: similar to NTAK alpha2 isoform 4                                                                          | LOC100045947  | XP_001475441 | 92       | 2             | not classified                                                   | not classified                                                                                                                                                                                                                                                                              | not classified                                                                                                                            |
| PREDICTED: hypothetical protein                                                                                      | LOC100040891  | XP_001475496 | 17       | 2             | not classified                                                   | not classified                                                                                                                                                                                                                                                                              | not classified                                                                                                                            |
| PREDICTED: similar to hCG1994130                                                                                     | LOC100045504  | XP_001475615 | 14       | 2             | not classified                                                   | not classified                                                                                                                                                                                                                                                                              | not classified                                                                                                                            |
| PREDICTED: similar to Nme6 protein                                                                                   | LOC100046163  | XP_001475760 | 21       | 2             | not classified                                                   | not classified                                                                                                                                                                                                                                                                              | not classified                                                                                                                            |
| PREDICTED: similar to Protein disulfide isomerase associated 6                                                       | LOC100046302  | XP_001476035 | 43       | 2             | not classified                                                   | not classified                                                                                                                                                                                                                                                                              | not classified                                                                                                                            |
| PREDICTED: hypothetical protein                                                                                      | LOC433745     | XP_001476854 | 21       | 2             | not classified                                                   | not classified                                                                                                                                                                                                                                                                              | not classified                                                                                                                            |
| PREDICTED: hypothetical protein                                                                                      | LOC100046994  | XP_001477245 | 72       | 2             | not classified                                                   | not classified                                                                                                                                                                                                                                                                              | not classified                                                                                                                            |
| PREDICTED: hypothetical protein                                                                                      | LOC100047450  | XP_001478226 | 7        | 2             | not classified                                                   | not classified                                                                                                                                                                                                                                                                              | not classified                                                                                                                            |
| PREDICTED: similar to Uncharacterized protein KIAA0423                                                               | A430041B07Rik | XP_001478588 | 201      | 2             | not classified                                                   | binding                                                                                                                                                                                                                                                                                     | not classified                                                                                                                            |
| PREDICTED: similar to zinc finger, UBR1 type 1 isoform 2                                                             | Zubr1         | XP_001479796 | 573      | 2             | cytoplasm, cytoskeleton, integral to membrane, membrane, nucleus | calmodulin binding, ligase activity, metal ion binding, ubiquitin-protein ligase activity, zinc ion binding                                                                                                                                                                                 | modification-dependent protein catabolic process                                                                                          |
| PREDICTED: similar to ribosomal protein S3a                                                                          | LOC100043780  | XP_001480995 | 30       | 2             | not classified                                                   | not classified                                                                                                                                                                                                                                                                              | not classified                                                                                                                            |
| PREDICTED: golgi autoantigen, golgin subfamily b, macrogolgin 1                                                      | Golgb1        | XP_001481110 | 369      | 2             | Golgi apparatus                                                  | not classified                                                                                                                                                                                                                                                                              | not classified                                                                                                                            |
| PREDICTED: progesterone receptor membrane component 2 isoform 1                                                      | Pgrmc2        | XP_130859    | 23       | 2             | cellular_component, integral to membrane, membrane               | heme binding, lipid binding, protein binding, receptor activity, steroid binding                                                                                                                                                                                                            | biological_process                                                                                                                        |
| PREDICTED: similar to ribosomal protein L27A                                                                         | EG432798      | XP_484309    | 17       | 2             | not classified                                                   | not classified                                                                                                                                                                                                                                                                              | not classified                                                                                                                            |
| PREDICTED: tensin 1                                                                                                  | Tns1          | XP_619639    | 201      | 2             | cell-substrate junction, focal adhesion                          | actin binding                                                                                                                                                                                                                                                                               | cell migration, cell-substrate junction assembly                                                                                          |
| PREDICTED: similar to RIKEN cDNA 1110020P15 gene                                                                     | EG622178      | XP_891680    | 7        | 2             | not classified                                                   | not classified                                                                                                                                                                                                                                                                              | not classified                                                                                                                            |
| PREDICTED: similar to NADH dehydrogenase (ubiquinone) Fe-S protein 6                                                 | EG623286      | XP_894909    | 13       | 2             | not classified                                                   | not classified                                                                                                                                                                                                                                                                              | not classified                                                                                                                            |
| PREDICTED: similar to S100 calcium-binding protein A11                                                               | EG546623      | XP_910351    | 17       | 2             | not classified                                                   | not classified                                                                                                                                                                                                                                                                              | not classified                                                                                                                            |
| PREDICTED: leucine-rich repeats and guanylate kinase domain containing isoform 3                                     | Lrguk         | XP_915918    | 93       | 2             | not classified                                                   | ATP binding, kinase activity, nucleotide binding, protein binding, transferase activity                                                                                                                                                                                                     | not classified                                                                                                                            |
| PREDICTED: similar to FLJ00341 protein isoform 3                                                                     | Nbeal2        | XP_916280    | 310      | 2             | not classified                                                   | not classified                                                                                                                                                                                                                                                                              | not classified                                                                                                                            |
| PREDICTED: hypothetical protein                                                                                      | EG433073      | XP_918674    | 21       | 2             | not classified                                                   | not classified                                                                                                                                                                                                                                                                              | not classified                                                                                                                            |
| PREDICTED: similar to Snrpf protein                                                                                  | Snrpf         | XP_919276    | 23       | 2             | nucleus, ribonucleoprotein complex, spliceosomal complex         | RNA binding                                                                                                                                                                                                                                                                                 | mRNA processing, RNA splicing                                                                                                             |
| PREDICTED: similar to glucocorticoid induced transcript 1                                                            | EG545216      | XP_919798    | 48       | 2             | not classified                                                   | not classified                                                                                                                                                                                                                                                                              | not classified                                                                                                                            |
| PREDICTED: similar to Small subunit processome component 20 homolog (Down-regulated in metastasis protein) isoform 4 | Utp20         | XP_922382    | 318      | 2             | nucleus                                                          | not classified                                                                                                                                                                                                                                                                              | not classified                                                                                                                            |
| PREDICTED: similar to amyotrophic lateral sclerosis 2 (juvenile) chromosome region, candidate 11                     | 4930408G06Rik | XP_984875    | 162      | 2             | not classified                                                   | not classified                                                                                                                                                                                                                                                                              | not classified                                                                                                                            |
| PREDICTED: similar to ribosomal protein L27a-like                                                                    | EG666648      | XP_990276    | 16       | 2             | not classified                                                   | not classified                                                                                                                                                                                                                                                                              | not classified                                                                                                                            |
| PREDICTED: hypothetical protein                                                                                      | EG638833      | XP_995982    | 38       | 2             | not classified                                                   | not classified                                                                                                                                                                                                                                                                              | not classified                                                                                                                            |
| F-box protein 41                                                                                                     | Fbxo41        | NP_001001160 | 94       | 1             | intracellular                                                    | zinc ion binding                                                                                                                                                                                                                                                                            | modification-dependent protein catabolic process                                                                                          |
| Leber congenital amaurosis 5-like                                                                                    | Lca5l         | NP_001001492 | 82       | 1             | not classified                                                   | not classified                                                                                                                                                                                                                                                                              | not classified                                                                                                                            |
| LIM and calponin homology domains 1                                                                                  | Limch1        | NP_001001980 | 118      | 1             | not classified                                                   | actin binding, metal ion binding, zinc ion binding                                                                                                                                                                                                                                          | actomyosin structure organization                                                                                                         |
| F-box and leucine-rich repeat protein 11                                                                             | Fbxl11        | NP_001001984 | 133      | 1             | nucleus                                                          | DNA binding, histone demethylase activity (H3-K36 specific), iron ion binding, metal ion binding, oxidoreductase activity, oxidoreductase activity, acting on single donors with incorporation of molecular oxygen, incorporation of two atoms of oxygen, protein binding, zinc ion binding | chromatin modification, modification-dependent protein catabolic process, oxidation reduction, regulation of transcription, transcription |

| Protein Name                                                     | Gene Name | Accession No | Mw (kDa) | Peptide Count | GO Component                                                                                    | GO Function                                                                                                                                                                                                                | GO Process                                                                                                                                                                                                                                    |
|------------------------------------------------------------------|-----------|--------------|----------|---------------|-------------------------------------------------------------------------------------------------|----------------------------------------------------------------------------------------------------------------------------------------------------------------------------------------------------------------------------|-----------------------------------------------------------------------------------------------------------------------------------------------------------------------------------------------------------------------------------------------|
| ribosomal protein L17                                            | Rpl17     | NP_001002239 | 21       | 1             | cellular_component, intracellular, large ribosomal subunit, ribonucleoprotein complex, ribosome | molecular_function, structural constituent of ribosome                                                                                                                                                                     | biological_process, translation                                                                                                                                                                                                               |
| TAR DNA binding protein isoform 5                                | Tardbp    | NP_001003898 | 34       | 1             | nucleus                                                                                         | DNA binding, nucleic acid binding, nucleotide binding, RNA binding                                                                                                                                                         | mRNA processing, regulation of transcription, RNA splicing, transcription                                                                                                                                                                     |
| contactin associated protein-like 2 isoform a                    | Cntnap2   | NP_001004357 | 148      | 1             | integral to membrane, membrane                                                                  | protein binding, receptor binding                                                                                                                                                                                          | cell adhesion, signal transduction                                                                                                                                                                                                            |
| phospholipase A2, group IVC (cytosolic, calcium-independent)     | Pla2g4c   | NP_001004762 | 68       | 1             | cellular_component                                                                              | molecular_function                                                                                                                                                                                                         | biological_process                                                                                                                                                                                                                            |
| ErbB2 interacting protein isoform 1                              | ErbB2ip   | NP_001005868 | 162      | 1             | basolateral plasma membrane, cell junction                                                      | protein binding                                                                                                                                                                                                            | protein targeting                                                                                                                                                                                                                             |
| solute carrier family 25, member 42                              | Slc25a42  | NP_001007571 | 35       | 1             | integral to membrane, membrane, mitochondrial inner membrane, mitochondrion                     | binding                                                                                                                                                                                                                    | transport                                                                                                                                                                                                                                     |
| development and differentiation enhancing factor-like 1          | Ddef1     | NP_001008233 | 99       | 1             | cytoplasm                                                                                       | ARF GTPase activator activity, metal ion binding, zinc ion binding                                                                                                                                                         | regulation of ARF GTPase activity                                                                                                                                                                                                             |
| SR-related CTD-associated factor 1                               | Scaf1     | NP_001008422 | 134      | 1             | nucleus                                                                                         | protein domain specific binding, RNA binding                                                                                                                                                                               | mRNA processing, RNA splicing, transcription from RNA polymerase II promoter                                                                                                                                                                  |
| WD repeat domain 91                                              | Wdr91     | NP_001013384 | 83       | 1             | not classified                                                                                  | not classified                                                                                                                                                                                                             | not classified                                                                                                                                                                                                                                |
| protein kinase, AMP-activated, alpha 1 catalytic subunit         | Prkaa1    | NP_001013385 | 64       | 1             | cytoplasm                                                                                       | ATP binding, kinase activity, magnesium ion binding, metal ion binding, nucleotide binding, protein kinase activity, protein serine/threonine kinase activity, transferase activity                                        | cholesterol biosynthetic process, fatty acid biosynthetic process, fatty acid oxidation, glucose metabolic process, lipid biosynthetic process, protein amino acid phosphorylation, steroid biosynthetic process, sterol biosynthetic process |
| killer cell lectin-like receptor subfamily H, member 1           | Gm156     | NP_001014997 | 26       | 1             | not classified                                                                                  | receptor activity, sugar binding                                                                                                                                                                                           | not classified                                                                                                                                                                                                                                |
| radical S-adenosyl methionine and flavodoxin domains 1 isoform 1 | Tyw1      | NP_001015876 | 82       | 1             | not classified                                                                                  | 4 iron, 4 sulfur cluster binding, catalytic activity, electron carrier activity, FMN binding, iron ion binding, iron-sulfur cluster binding, metal ion binding, nucleotide binding, oxidoreductase activity                | oxidation reduction, tRNA processing                                                                                                                                                                                                          |
| jumonji domain containing 3                                      | Jmjd3     | NP_001017426 | 176      | 1             | nucleus                                                                                         | iron ion binding, metal ion binding, oxidoreductase activity, oxidoreductase activity, acting on single donors with incorporation of molecular oxygen, incorporation of two atoms of oxygen, sequence-specific DNA binding | chromatin modification, histone demethylation, inflammatory response, negative regulation of transcription from RNA polymerase II promoter, oxidation reduction                                                                               |
| cytochrome c oxidase subunit XVII assembly protein homolog       | Cox17     | NP_001017429 | 7        | 1             | mitochondrial intermembrane space, mitochondrion                                                | copper chaperone activity, copper ion binding, enzyme activator activity, metal ion binding                                                                                                                                | copper ion transport                                                                                                                                                                                                                          |
| UDP glucuronosyltransferase 2 family, polypeptide A2             | Ugt2a2    | NP_001019319 | 60       | 1             | integral to membrane, membrane                                                                  | glucuronosyltransferase activity, transferase activity, transferase activity, transferring glycosyl groups, transferase activity, transferring hexosyl groups                                                              | metabolic process                                                                                                                                                                                                                             |

| Protein Name                              | Gene Name      | Accession No | Mw (kDa) | Peptide Count | GO Component                                              | GO Function                                                                                                                                                    | GO Process                                                                                                                                                                                                                                                                                                                                                                                                                                                                                                                                     |
|-------------------------------------------|----------------|--------------|----------|---------------|-----------------------------------------------------------|----------------------------------------------------------------------------------------------------------------------------------------------------------------|------------------------------------------------------------------------------------------------------------------------------------------------------------------------------------------------------------------------------------------------------------------------------------------------------------------------------------------------------------------------------------------------------------------------------------------------------------------------------------------------------------------------------------------------|
| DEAD (Asp-Glu-Ala-Asp) box polypeptide 49 | Ddx49          | NP_001020093 | 54       | 1             | cellular_component                                        | ATP binding, ATP-dependent helicase activity, helicase activity, hydrolase activity, molecular_function, nucleic acid binding, nucleotide binding, RNA binding | biological_process                                                                                                                                                                                                                                                                                                                                                                                                                                                                                                                             |
| testase 6                                 | EG384813       | NP_001020411 | 83       | 1             | not classified                                            | not classified                                                                                                                                                 | not classified                                                                                                                                                                                                                                                                                                                                                                                                                                                                                                                                 |
| WD repeat domain 61 isoform a             | Wdr61          | NP_001020546 | 34       | 1             | not classified                                            | not classified                                                                                                                                                 | not classified                                                                                                                                                                                                                                                                                                                                                                                                                                                                                                                                 |
| hypothetical protein LOC545428            | 2610301F02 Rik | NP_001020747 | 84       | 1             | not classified                                            | not classified                                                                                                                                                 | not classified                                                                                                                                                                                                                                                                                                                                                                                                                                                                                                                                 |
| SEC14-like 3                              | Sec14l3        | NP_001025108 | 46       | 1             | not classified                                            | not classified                                                                                                                                                 | not classified                                                                                                                                                                                                                                                                                                                                                                                                                                                                                                                                 |
| Sec23 interacting protein                 | Sec23ip        | NP_001025153 | 111      | 1             | cytoplasmic vesicle, endoplasmic reticulum, membrane      | metal ion binding                                                                                                                                              | not classified                                                                                                                                                                                                                                                                                                                                                                                                                                                                                                                                 |
| FAT tumor suppressor homolog 2            | Fat2           | NP_001025159 | 480      | 1             | not classified                                            | calcium ion binding                                                                                                                                            | not classified                                                                                                                                                                                                                                                                                                                                                                                                                                                                                                                                 |
| conserved nuclear protein Nhn1 isoform a  | Zc3h18         | NP_001025164 | 108      | 1             | nucleus                                                   | metal ion binding, nucleic acid binding, zinc ion binding                                                                                                      | not classified                                                                                                                                                                                                                                                                                                                                                                                                                                                                                                                                 |
| peripheral myelin protein 2               | Pmp2           | NP_001025476 | 15       | 1             | not classified                                            | binding, lipid binding, transporter activity                                                                                                                   | transport                                                                                                                                                                                                                                                                                                                                                                                                                                                                                                                                      |
| syntaxin-binding protein 3B               | Stxbp3b        | NP_001025488 | 31       | 1             | cellular_component                                        | molecular_function                                                                                                                                             | biological_process                                                                                                                                                                                                                                                                                                                                                                                                                                                                                                                             |
| hypothetical protein LOC97130             | C77080         | NP_001028361 | 111      | 1             | not classified                                            | not classified                                                                                                                                                 | not classified                                                                                                                                                                                                                                                                                                                                                                                                                                                                                                                                 |
| hypothetical protein LOC102502            | AI427122       | NP_001028382 | 70       | 1             | cytoplasm                                                 | actin binding, calcium ion binding, molecular_function                                                                                                         | biological_process                                                                                                                                                                                                                                                                                                                                                                                                                                                                                                                             |
| zinc finger and BTB domain containing 16  | Zbtb16         | NP_001028496 | 74       | 1             | nuclear speck, nucleus, transcriptional repressor complex | DNA binding, metal ion binding, protein binding, specific transcriptional repressor activity, zinc ion binding                                                 | anterior/posterior pattern formation, central nervous system development, embryonic hindlimb morphogenesis, embryonic limb morphogenesis, embryonic pattern specification, forelimb morphogenesis, hemopoiesis, leg morphogenesis, male germ-line stem cell division, mesonephros development, negative regulation of cell proliferation, negative regulation of myeloid cell differentiation, negative regulation of transcription, DNA-dependent, positive regulation of apoptosis, regulation of transcription, skeletal system development |
| NLR family, CARD domain containing 4      | Nlrc4          | NP_001028539 | 117      | 1             | not classified                                            | not classified                                                                                                                                                 | inflammatory response, regulation of apoptosis, regulation of caspase activity                                                                                                                                                                                                                                                                                                                                                                                                                                                                 |
| hypothetical protein LOC319277            | A230046K03 Rik | NP_001028547 | 136      | 1             | not classified                                            | not classified                                                                                                                                                 | not classified                                                                                                                                                                                                                                                                                                                                                                                                                                                                                                                                 |
| expressed sequence AU045404               | Alg10b         | NP_001028613 | 55       | 1             | integral to membrane, membrane, plasma membrane           | transferase activity, transferase activity, transferring glycosyl groups, transferase activity, transferring hexosyl groups                                    | not classified                                                                                                                                                                                                                                                                                                                                                                                                                                                                                                                                 |
| hypothetical protein LOC381126            | Gm944          | NP_001028617 | 97       | 1             | not classified                                            | not classified                                                                                                                                                 | not classified                                                                                                                                                                                                                                                                                                                                                                                                                                                                                                                                 |
| F-box and WD-40 domain protein 10         | Fbxw10         | NP_001028841 | 117      | 1             | cellular_component                                        | molecular_function                                                                                                                                             | biological_process                                                                                                                                                                                                                                                                                                                                                                                                                                                                                                                             |
| zinc fingr protein 551                    | Zfp551         | NP_001028992 | 80       | 1             | intracellular, nucleus                                    | metal ion binding, nucleic acid binding, zinc ion binding                                                                                                      | regulation of transcription, DNA-dependent                                                                                                                                                                                                                                                                                                                                                                                                                                                                                                     |
| hypothetical protein LOC66270 isoform 1   | 1810015C04 Rik | NP_001030023 | 53       | 1             | integral to membrane, membrane                            | not classified                                                                                                                                                 | not classified                                                                                                                                                                                                                                                                                                                                                                                                                                                                                                                                 |

| Protein Name                                                                 | Gene Name | Accession No | Mw (kDa) | Peptide Count | GO Component                                                                                                                 | GO Function                                                                                                                                                                                                                                                                                                                                                                                                                                                  | GO Process                                                                                                                                                                                                                                                                                                                                                                                                                                                                                                                                                                                                                                                                                                                                                                                                                                                                                       |
|------------------------------------------------------------------------------|-----------|--------------|----------|---------------|------------------------------------------------------------------------------------------------------------------------------|--------------------------------------------------------------------------------------------------------------------------------------------------------------------------------------------------------------------------------------------------------------------------------------------------------------------------------------------------------------------------------------------------------------------------------------------------------------|--------------------------------------------------------------------------------------------------------------------------------------------------------------------------------------------------------------------------------------------------------------------------------------------------------------------------------------------------------------------------------------------------------------------------------------------------------------------------------------------------------------------------------------------------------------------------------------------------------------------------------------------------------------------------------------------------------------------------------------------------------------------------------------------------------------------------------------------------------------------------------------------------|
| NIMA (never in mitosis gene a)- related kinase 10                            | Nek10     | NP_001030037 | 42       | 1             | not classified                                                                                                               | ATP binding, binding, kinase activity, magnesium ion binding, metal ion binding, nucleotide binding, protein kinase activity, protein serine/threonine kinase activity, protein tyrosine kinase activity, transferase activity                                                                                                                                                                                                                               | protein amino acid phosphorylation                                                                                                                                                                                                                                                                                                                                                                                                                                                                                                                                                                                                                                                                                                                                                                                                                                                               |
| zinc finger CCCH-type containing 12B                                         | Zc3h12b   | NP_001030079 | 94       | 1             | not classified                                                                                                               | not classified                                                                                                                                                                                                                                                                                                                                                                                                                                               | not classified                                                                                                                                                                                                                                                                                                                                                                                                                                                                                                                                                                                                                                                                                                                                                                                                                                                                                   |
| transient receptor potential cation channel, subfamily M, member 3 isoform i | Trpm3     | NP_001030323 | 28       | 1             | integral to membrane                                                                                                         | cation channel activity, ion channel activity, receptor activity                                                                                                                                                                                                                                                                                                                                                                                             | cation transport, ion transport, transport                                                                                                                                                                                                                                                                                                                                                                                                                                                                                                                                                                                                                                                                                                                                                                                                                                                       |
| plasma membrane calcium ATPase 2 isoform 2                                   | Atp2b2    | NP_001031761 | 133      | 1             | apical plasma membrane, cell soma, cilium, endoplasmic reticulum, integral to membrane, membrane, microsome, plasma membrane | ATP binding, ATPase activity, coupled to transmembrane movement of ions, phosphorylative mechanism, calcium ion binding, calcium ion transporter activity, calcium-dependent ATPase activity, calcium-transporting ATPase activity, calmodulin binding, catalytic activity, hydrolase activity, hydrolase activity, acting on acid anhydrides, catalyzing transmembrane movement of substances, magnesium ion binding, metal ion binding, nucleotide binding | ATP biosynthetic process, auditory receptor cell stereocilium organization, calcium ion transport, cation transport, cell morphogenesis, cellular calcium ion homeostasis, cerebellar granule cell differentiation, cerebellar Purkinje cell differentiation, cerebellar Purkinje cell layer morphogenesis, cerebellum development, cGMP metabolic process, detection of mechanical stimulus involved in sensory perception of sound, inner ear development, inner ear morphogenesis, inner ear receptor cell differentiation, ion transport, lactation, locomotion, locomotory behavior, metabolic process, neuromuscular process controlling balance, organelle organization, otolith mineralization, positive regulation of calcium ion transport, regulation of cell size, regulation of synaptic plasticity, sensory perception of sound, serotonin metabolic process, synapse organization |
| RUN and SH3 domain containing 2                                              | Rusc2     | NP_001032798 | 162      | 1             | cytoplasm                                                                                                                    | not classified                                                                                                                                                                                                                                                                                                                                                                                                                                               | not classified                                                                                                                                                                                                                                                                                                                                                                                                                                                                                                                                                                                                                                                                                                                                                                                                                                                                                   |
| brain-specific angiogenesis inhibitor 1-associated protein 2 isoform c       | Baiap2    | NP_001032843 | 53       | 1             | cell projection, cytoplasm, membrane                                                                                         | cytoskeletal adaptor activity, protein binding, SH3 domain binding                                                                                                                                                                                                                                                                                                                                                                                           | filopodium assembly, Rho protein signal transduction, signal transduction                                                                                                                                                                                                                                                                                                                                                                                                                                                                                                                                                                                                                                                                                                                                                                                                                        |
| beta-transducin repeat containing protein isoform a                          | Btrc      | NP_001032847 | 69       | 1             | not classified                                                                                                               | ligase activity, protein binding                                                                                                                                                                                                                                                                                                                                                                                                                             | branching involved in mammary gland duct morphogenesis, mammary gland epithelial cell proliferation, protein catabolic process, regulation of cell cycle, regulation of I-kappaB kinase/NF-kappaB cascade                                                                                                                                                                                                                                                                                                                                                                                                                                                                                                                                                                                                                                                                                        |
| ubiquitin specific protease 14 isoform 2                                     | Usp14     | NP_001033678 | 52       | 1             | soluble fraction, synaptosome                                                                                                | cysteine-type peptidase activity, hydrolase activity, peptidase activity, ubiquitin thiolesterase activity                                                                                                                                                                                                                                                                                                                                                   | modification-dependent protein catabolic process, synaptic transmission, ubiquitin-dependent protein catabolic process                                                                                                                                                                                                                                                                                                                                                                                                                                                                                                                                                                                                                                                                                                                                                                           |
| dynammin 3 isoform 1                                                         | Dnm3      | NP_001033708 | 97       | 1             | cytoplasm, cytoskeleton, microtubule, mitochondrion                                                                          | GTP binding, GTPase activity, hydrolase activity, molecular function, motor activity, nucleotide binding                                                                                                                                                                                                                                                                                                                                                     | biological_process, endocytosis                                                                                                                                                                                                                                                                                                                                                                                                                                                                                                                                                                                                                                                                                                                                                                                                                                                                  |

| Protein Name                                                | Gene Name | Accession No | Mw (kDa) | Peptide Count | GO Component                                                                                                                      | GO Function                                                                                                                                                       | GO Process                                                                                             |
|-------------------------------------------------------------|-----------|--------------|----------|---------------|-----------------------------------------------------------------------------------------------------------------------------------|-------------------------------------------------------------------------------------------------------------------------------------------------------------------|--------------------------------------------------------------------------------------------------------|
| mitochondrial ribosomal protein L1 isoform 2                | Mrpl1     | NP_001034173 | 31       | 1             | intracellular, large ribosomal subunit, mitochondrial large ribosomal subunit, mitochondrion, ribonucleoprotein complex, ribosome | RNA binding, structural constituent of ribosome                                                                                                                   | RNA processing, translation                                                                            |
| defensin beta 26                                            | Defb26    | NP_001034209 | 20       | 1             | not classified                                                                                                                    | not classified                                                                                                                                                    | not classified                                                                                         |
| nucleolar and coiled-body phosphoprotein 1 isoform D        | Nolc1     | NP_001034442 | 74       | 1             | Cajal body, nucleolus, nucleoplasm, small nuclear ribonucleoprotein complex                                                       | protein binding                                                                                                                                                   | nucleolus organization                                                                                 |
| transcription elongation regulator 1                        | Tcerg1    | NP_001034563 | 124      | 1             | nuclear matrix, nucleus                                                                                                           | protein binding, transcription factor activity                                                                                                                    | regulation of transcription, transcription                                                             |
| solute carrier organic anion transporter family, member 6b1 | Slco6b1   | NP_001034564 | 79       | 1             | integral to plasma membrane                                                                                                       | organic anion transmembrane transporter activity                                                                                                                  | organic anion transport                                                                                |
| poly (ADP-ribose) polymerase family, member 14              | Parp14    | NP_001034619 | 204      | 1             | cytoplasm, nucleus                                                                                                                | NAD+ ADP-ribosyltransferase activity, nucleic acid binding, protein binding, transferase activity, transferring glycosyl groups                                   | regulation of transcription, transcription                                                             |
| ecotropic viral integration site 5 like                     | Evi5l     | NP_001034667 | 93       | 1             | not classified                                                                                                                    | Rab GTPase activator activity                                                                                                                                     | not classified                                                                                         |
| paternally expressed 10 isoform RF1                         | Peg10     | NP_001035701 | 42       | 1             | cytoplasm, nucleus                                                                                                                | DNA binding, metal ion binding, nucleic acid binding, zinc ion binding                                                                                            | apoptosis, cell differentiation, placenta development                                                  |
| DEAH (Asp-Glu-Ala-His) box polypeptide 15 isoform 1         | Dhx15     | NP_001036085 | 80       | 1             | nucleus                                                                                                                           | ATP binding, ATP-dependent helicase activity, helicase activity, hydrolase activity, nucleic acid binding, nucleoside-triphosphatase activity, nucleotide binding | mRNA processing, RNA splicing                                                                          |
| Opa interacting protein 5                                   | Oip5      | NP_001036118 | 27       | 1             | Cajal body, chromatin, chromocenter, chromosome, centromeric region, nucleus                                                      | protein binding                                                                                                                                                   | cell cycle, cell division, mitosis                                                                     |
| neogenin isoform 2                                          | Neo1      | NP_001036217 | 160      | 1             | integral to membrane, membrane, plasma membrane                                                                                   | cadherin binding, protein binding, receptor activity, transcription regulator activity                                                                            | cell adhesion, myoblast fusion, regulation of transcription                                            |
| hedgehog interacting protein-like 1                         | Hhip1     | NP_001037845 | 88       | 1             | extracellular region, membrane                                                                                                    | scavenger receptor activity                                                                                                                                       | not classified                                                                                         |
| adaptor protein complex AP-2, alpha 1 subunit isoform b     | Ap2a1     | NP_001070732 | 105      | 1             | clathrin adaptor complex, cytoplasmic vesicle, Golgi apparatus, membrane, membrane coat, secretory granule                        | protein binding, protein transporter activity                                                                                                                     | endocytosis, intracellular protein transport, protein transport, transport, vesicle-mediated transport |
| glutathione S-transferase, alpha 3                          | Gsta3     | NP_001070821 | 25       | 1             | cytoplasm                                                                                                                         | glutathione transferase activity, transferase activity                                                                                                            | metabolic process                                                                                      |



| Protein Name                                                                  | Gene Name      | Accession No | Mw (kDa) | Peptide Count | GO Component                                           | GO Function                                                                                                                                                                           | GO Process                                                                                                                                                                                                                                                                                                                                                                                                                                                                                                                                                                                                                                                                                                                                                                                                                                                                                                |
|-------------------------------------------------------------------------------|----------------|--------------|----------|---------------|--------------------------------------------------------|---------------------------------------------------------------------------------------------------------------------------------------------------------------------------------------|-----------------------------------------------------------------------------------------------------------------------------------------------------------------------------------------------------------------------------------------------------------------------------------------------------------------------------------------------------------------------------------------------------------------------------------------------------------------------------------------------------------------------------------------------------------------------------------------------------------------------------------------------------------------------------------------------------------------------------------------------------------------------------------------------------------------------------------------------------------------------------------------------------------|
| protein tyrosine phosphatase, non-receptor type 6 isoform b                   | Ptpn6          | NP_001071173 | 68       | 1             | alpha-beta T cell receptor complex, cytoplasm, nucleus | hydrolase activity, phosphatase activity, phosphoprotein phosphatase activity, phosphotyrosine binding, protein tyrosine phosphatase activity, SH2 domain binding, SH3 domain binding | B cell receptor signaling pathway, cytokine-mediated signaling pathway, dephosphorylation, intracellular signaling cascade, natural killer cell mediated cytotoxicity, negative regulation of humoral immune response mediated by circulating immunoglobulin, negative regulation of MAP kinase activity, negative regulation of MAPKKK cascade, negative regulation of peptidyl-tyrosine phosphorylation, negative regulation of T cell proliferation, negative regulation of T cell receptor signaling pathway, protein amino acid dephosphorylation, regulation of B cell differentiation                                                                                                                                                                                                                                                                                                              |
| general transcription factor II I isoform 5                                   | Gtf2i          | NP_001074218 | 108      | 1             | cell projection, cell soma, cytoplasm, nucleus         | DNA binding, mitogen-activated protein kinase binding                                                                                                                                 | embryonic development, regulation of transcription, transcription                                                                                                                                                                                                                                                                                                                                                                                                                                                                                                                                                                                                                                                                                                                                                                                                                                         |
| Ras-GTPase-activating protein (GAP120) SH3-domain binding protein 2 isoform a | G3bp2          | NP_001074266 | 54       | 1             | cellular_component, intracellular                      | nucleic acid binding, nucleotide binding, protein binding, RNA binding                                                                                                                | mRNA transport, small GTPase mediated signal transduction, transport                                                                                                                                                                                                                                                                                                                                                                                                                                                                                                                                                                                                                                                                                                                                                                                                                                      |
| cerebellar degeneration-related protein 2-like                                | Cdr2l          | NP_001074398 | 53       | 1             | not classified                                         | not classified                                                                                                                                                                        | not classified                                                                                                                                                                                                                                                                                                                                                                                                                                                                                                                                                                                                                                                                                                                                                                                                                                                                                            |
| breast cancer 2                                                               | Brca2          | NP_001074470 | 371      | 1             | cytoplasm, nucleus                                     | protein binding, single-stranded DNA binding                                                                                                                                          | brain development, cell aging, cell proliferation, chordate embryonic development, chromosome organization, cytokinesis during cell cycle, DNA damage response, signal transduction by p53 class mediator resulting in induction of apoptosis, DNA damage response, signal transduction by p53 class mediator resulting in transcription of p21 class mediator, DNA damage response, signal transduction resulting in induction of apoptosis, DNA recombination, DNA repair, double-strand break repair, double-strand break repair via homologous recombination, female gonad development, hemocyte proliferation, hemopoiesis, inner cell mass cell proliferation, male meiosis I, oocyte maturation, positive regulation of mitotic cell cycle, regulation of S phase of mitotic cell cycle, replication fork protection, response to DNA damage stimulus, response to gamma radiation, response to UV |
| signal-induced proliferation-associated 1 like 3                              | Sipa1l3        | NP_001074497 | 195      | 1             | not classified                                         | not classified                                                                                                                                                                        | not classified                                                                                                                                                                                                                                                                                                                                                                                                                                                                                                                                                                                                                                                                                                                                                                                                                                                                                            |
| hypothetical protein LOC68505                                                 | 1110014N23 Rik | NP_001074510 | 86       | 1             | Golgi apparatus                                        | not classified                                                                                                                                                                        | lipid transport, protein transport, transport                                                                                                                                                                                                                                                                                                                                                                                                                                                                                                                                                                                                                                                                                                                                                                                                                                                             |
| coiled-coil domain containing 90A                                             | Ccdc90a        | NP_001074528 | 38       | 1             | integral to membrane, membrane, mitochondrion          | not classified                                                                                                                                                                        | not classified                                                                                                                                                                                                                                                                                                                                                                                                                                                                                                                                                                                                                                                                                                                                                                                                                                                                                            |

| Protein Name                                      | Gene Name      | Accession No | Mw (kDa) | Peptide Count | GO Component                                                                                                      | GO Function                                                                                                                                                                                                                                                                                                                                       | GO Process                                                                                                                                                                                                     |
|---------------------------------------------------|----------------|--------------|----------|---------------|-------------------------------------------------------------------------------------------------------------------|---------------------------------------------------------------------------------------------------------------------------------------------------------------------------------------------------------------------------------------------------------------------------------------------------------------------------------------------------|----------------------------------------------------------------------------------------------------------------------------------------------------------------------------------------------------------------|
| lactase                                           | Lct            | NP_001074547 | 218      | 1             | not classified                                                                                                    | hydrolase activity, hydrolase activity, acting on glycosyl bonds                                                                                                                                                                                                                                                                                  | metabolic process                                                                                                                                                                                              |
| cytokine like 1                                   | Cyt1           | NP_001074575 | 16       | 1             | not classified                                                                                                    | transcription activator activity                                                                                                                                                                                                                                                                                                                  | chondrocyte differentiation, chondroitin sulfate proteoglycan biosynthetic process, positive regulation of transcription factor activity, positive regulation of transcription from RNA polymerase II promoter |
| TATA element modulatory factor 1                  | Tmf1           | NP_001074580 | 122      | 1             | cytoplasm, Golgi apparatus, membrane, nucleus                                                                     | DNA binding                                                                                                                                                                                                                                                                                                                                       | regulation of transcription, transcription                                                                                                                                                                     |
| hypothetical protein LOC75404                     | 1100001E04 Rik | NP_001074592 | 67       | 1             | not classified                                                                                                    | not classified                                                                                                                                                                                                                                                                                                                                    | not classified                                                                                                                                                                                                 |
| oxoglutarate dehydrogenase-like                   | Ogdhl          | NP_001074599 | 117      | 1             | not classified                                                                                                    | not classified                                                                                                                                                                                                                                                                                                                                    | not classified                                                                                                                                                                                                 |
| prickle-like 2                                    | Prickle2       | NP_001074615 | 102      | 1             | apicolateral plasma membrane, lateral plasma membrane, membrane, nucleus                                          | metal ion binding, zinc ion binding                                                                                                                                                                                                                                                                                                               | establishment or maintenance of epithelial cell apical/basal polarity                                                                                                                                          |
| LON peptidase N-terminal domain and ring finger 1 | Lonrf1         | NP_001074619 | 93       | 1             | not classified                                                                                                    | not classified                                                                                                                                                                                                                                                                                                                                    | not classified                                                                                                                                                                                                 |
| unc13 homolog 3                                   | Unc13c         | NP_001074622 | 250      | 1             | cell junction, cellular_component, cytoplasm, membrane, plasma membrane, synapse                                  | diacylglycerol binding, metal ion binding, non-kinase phorbol ester receptor activity, zinc ion binding                                                                                                                                                                                                                                           | exocytosis, intracellular signaling cascade, synaptic transmission                                                                                                                                             |
| HEAT repeat containing 5B                         | Heatr5b        | NP_001074648 | 224      | 1             | not classified                                                                                                    | not classified                                                                                                                                                                                                                                                                                                                                    | not classified                                                                                                                                                                                                 |
| ATPase, class I, type 8B, member 2                | Atp8b2         | NP_001074651 | 137      | 1             | integral to membrane, membrane                                                                                    | ATP binding, ATPase activity, coupled to transmembrane movement of ions, phosphorylative mechanism, hydrolase activity, hydrolase activity, acting on acid anhydrides, catalyzing transmembrane movement of substances, magnesium ion binding, metal ion binding, nucleotide binding, phospholipid-translocating ATPase activity, protein binding | ATP biosynthetic process, phospholipid transport                                                                                                                                                               |
| LEM domain containing 3                           | Lemd3          | NP_001074662 | 100      | 1             | integral to membrane, integral to nuclear inner membrane, membrane, nuclear envelope, nucleus                     | DNA binding, nucleotide binding                                                                                                                                                                                                                                                                                                                   | not classified                                                                                                                                                                                                 |
| endoplasmic reticulum metalloproteinase 1         | Ermp1          | NP_001074682 | 100      | 1             | endoplasmic reticulum, integral to membrane, membrane                                                             | hydrolase activity, metal ion binding, metalloproteinase activity, peptidase activity, zinc ion binding                                                                                                                                                                                                                                           | proteolysis                                                                                                                                                                                                    |
| host cell factor 2                                | Hcfc2          | NP_001074687 | 79       | 1             | not classified                                                                                                    | not classified                                                                                                                                                                                                                                                                                                                                    | not classified                                                                                                                                                                                                 |
| myosin IA                                         | Myo1a          | NP_001074688 | 119      | 1             | apical plasma membrane, basal plasma membrane, brush border, lateral plasma membrane, microvillus, myosin complex | actin binding, ATP binding, calmodulin binding, motor activity, nucleotide binding                                                                                                                                                                                                                                                                | cell projection organization, microvillus assembly                                                                                                                                                             |

| Protein Name                                                                          | Gene Name      | Accession No | Mw (kDa) | Peptide Count | GO Component                                                                                         | GO Function                                                                                                                                                                                                                                                                 | GO Process                                                                                                                                                                                                                                                                                                                                                                                                                                                      |
|---------------------------------------------------------------------------------------|----------------|--------------|----------|---------------|------------------------------------------------------------------------------------------------------|-----------------------------------------------------------------------------------------------------------------------------------------------------------------------------------------------------------------------------------------------------------------------------|-----------------------------------------------------------------------------------------------------------------------------------------------------------------------------------------------------------------------------------------------------------------------------------------------------------------------------------------------------------------------------------------------------------------------------------------------------------------|
| excision repair cross-complementing rodent repair deficiency, complementation group 6 | Erc6           | NP_001074690 | 166      | 1             | not classified                                                                                       | not classified                                                                                                                                                                                                                                                              | activation of JNKK activity, activation of JUN kinase activity, DNA damage response, signal transduction resulting in induction of apoptosis, DNA repair, photoreceptor cell maintenance, pyrimidine dimer repair, response to DNA damage stimulus, response to gamma radiation, response to oxidative stress, response to superoxide, response to toxin, response to UV, response to UV-B, response to X-ray, transcription-coupled nucleotide-excision repair |
| hypothetical protein LOC69549                                                         | Z310009B15 Rik | NP_001074695 | 15       | 1             | not classified                                                                                       | not classified                                                                                                                                                                                                                                                              | not classified                                                                                                                                                                                                                                                                                                                                                                                                                                                  |
| hypothetical protein LOC75687                                                         | Z310066E14 Rik | NP_001074710 | 132      | 1             | not classified                                                                                       | binding                                                                                                                                                                                                                                                                     | not classified                                                                                                                                                                                                                                                                                                                                                                                                                                                  |
| versican                                                                              | Vcan           | NP_001074718 | 367      | 1             | extracellular region, proteinaceous extracellular matrix                                             | binding, calcium ion binding, hyaluronic acid binding, sugar binding                                                                                                                                                                                                        | cell adhesion, heart development                                                                                                                                                                                                                                                                                                                                                                                                                                |
| leucine-rich repeats and calponin homology (CH) domain containing 3                   | Lrch3          | NP_001074724 | 86       | 1             | extracellular region                                                                                 | protein binding                                                                                                                                                                                                                                                             | not classified                                                                                                                                                                                                                                                                                                                                                                                                                                                  |
| BAT2 domain containing 1                                                              | Bat2d          | NP_001074759 | 311      | 1             | cellular_component                                                                                   | molecular_function                                                                                                                                                                                                                                                          | biological_process                                                                                                                                                                                                                                                                                                                                                                                                                                              |
| PDS5, regulator of cohesion maintenance, homolog A                                    | Pds5a          | NP_001074790 | 150      | 1             | nucleus                                                                                              | not classified                                                                                                                                                                                                                                                              | cell cycle, cell division, mitosis                                                                                                                                                                                                                                                                                                                                                                                                                              |
| chondroitin sulfate synthase 3                                                        | Chsy3          | NP_001074797 | 100      | 1             | Golgi apparatus, Golgi cisterna membrane, integral to membrane, membrane                             | glucuronosyl-N-acetylgalactosaminyl-proteoglycan 4-beta-N-acetylgalactosaminyltransferase activity, metal ion binding, N-acetylgalactosaminyl-proteoglycan 3-beta-glucuronosyltransferase activity, transferase activity, transferase activity, transferring hexosyl groups | not classified                                                                                                                                                                                                                                                                                                                                                                                                                                                  |
| dynein, axonemal, heavy chain 2                                                       | Dnahc2         | NP_001074799 | 512      | 1             | cell projection, cilium, dynein complex, microtubule                                                 | ATP binding, ATPase activity, microtubule motor activity, motor activity, nucleoside-triphosphatase activity, nucleotide binding                                                                                                                                            | microtubule-based movement                                                                                                                                                                                                                                                                                                                                                                                                                                      |
| tetratricopeptide repeat domain 37                                                    | Ttc37          | NP_001074821 | 174      | 1             | not classified                                                                                       | not classified                                                                                                                                                                                                                                                              | not classified                                                                                                                                                                                                                                                                                                                                                                                                                                                  |
| vacuolar protein sorting 8 homolog                                                    | Vps8           | NP_001074835 | 161      | 1             | not classified                                                                                       | metal ion binding, protein binding, zinc ion binding                                                                                                                                                                                                                        | not classified                                                                                                                                                                                                                                                                                                                                                                                                                                                  |
| hypothetical protein LOC270150                                                        | BC038167       | NP_001074838 | 14       | 1             | not classified                                                                                       | not classified                                                                                                                                                                                                                                                              | not classified                                                                                                                                                                                                                                                                                                                                                                                                                                                  |
| SH3/ankyrin domain gene 2 isoform a                                                   | Shank2         | NP_001074839 | 135      | 1             | cell junction, cell projection, cytoplasm, membrane, plasma membrane, postsynaptic membrane, synapse | protein binding, SH3 domain binding                                                                                                                                                                                                                                         | not classified                                                                                                                                                                                                                                                                                                                                                                                                                                                  |
| myeloid/lymphoid or mixed-lineage leukemia 3                                          | Mll3           | NP_001074852 | 540      | 1             | histone methyltransferase complex, nucleus                                                           | DNA binding, histone methyltransferase activity (H3-K4 specific), histone-lysine N-methyltransferase activity, metal ion binding, methyltransferase activity, protein binding, transferase activity, zinc ion binding                                                       | chromatin modification, histone methylation, intracellular signaling cascade, regulation of transcription, regulation of transcription, DNA-dependent, transcription                                                                                                                                                                                                                                                                                            |

| Protein Name                                               | Gene Name     | Accession No | Mw (kDa) | Peptide Count | GO Component                                                                                                                                                                                                                                                                            | GO Function                                                                                                    | GO Process                                                                                                                                                                                                                                                                      |
|------------------------------------------------------------|---------------|--------------|----------|---------------|-----------------------------------------------------------------------------------------------------------------------------------------------------------------------------------------------------------------------------------------------------------------------------------------|----------------------------------------------------------------------------------------------------------------|---------------------------------------------------------------------------------------------------------------------------------------------------------------------------------------------------------------------------------------------------------------------------------|
| midasin                                                    | Mdn1          | NP_001074861 | 630      | 1             | not classified                                                                                                                                                                                                                                                                          | ATP binding, nucleotide binding                                                                                | not classified                                                                                                                                                                                                                                                                  |
| armadillo repeat containing 4                              | Armc4         | NP_001074862 | 115      | 1             | cellular_component                                                                                                                                                                                                                                                                      | molecular_function                                                                                             | biological_process                                                                                                                                                                                                                                                              |
| myosin XVI                                                 | Myo16         | NP_001074866 | 208      | 1             | cytoplasm, myosin complex                                                                                                                                                                                                                                                               | actin binding, ATP binding, motor activity, nucleotide binding                                                 | not classified                                                                                                                                                                                                                                                                  |
| hypothetical protein LOC665775                             | A230054D04Rik | NP_001074891 | 327      | 1             | not classified                                                                                                                                                                                                                                                                          | not classified                                                                                                 | not classified                                                                                                                                                                                                                                                                  |
| tubulin tyrosine ligase-like family, member 5              | Tll5          | NP_001074892 | 151      | 1             | cell projection, cilium, cytoplasm, nucleus                                                                                                                                                                                                                                             | ligase activity, tubulin-tyrosine ligase activity                                                              | protein modification process, transcription                                                                                                                                                                                                                                     |
| hypothetical protein LOC75906                              | 4930589M24Rik | NP_001074897 | 133      | 1             | not classified                                                                                                                                                                                                                                                                          | not classified                                                                                                 | not classified                                                                                                                                                                                                                                                                  |
| prolyl-tRNA synthetase (mitochondrial)(putative) isoform 2 | Pars2         | NP_001077356 | 58       | 1             | cytoplasm, mitochondrion                                                                                                                                                                                                                                                                | aminoacyl-tRNA ligase activity, ATP binding, ligase activity, nucleotide binding, proline-tRNA ligase activity | prolyl-tRNA aminoacylation, translation, tRNA aminoacylation for protein translation                                                                                                                                                                                            |
| glutathione peroxidase 3 isoform 1                         | Gpx3          | NP_001077398 | 28       | 1             | extracellular region                                                                                                                                                                                                                                                                    | glutathione peroxidase activity, oxidoreductase activity, peroxidase activity, selenium binding                | hydrogen peroxide catabolic process, oxidation reduction, response to oxidative stress                                                                                                                                                                                          |
| apoptotic chromatin condensation inducer 1 isoform 4       | Acin1         | NP_001078942 | 65       | 1             | nucleolus, nucleus                                                                                                                                                                                                                                                                      | nucleic acid binding, nucleotide binding                                                                       | apoptosis                                                                                                                                                                                                                                                                       |
| hypothetical protein LOC268498                             | E030025P04Rik | NP_001078981 | 21       | 1             | not classified                                                                                                                                                                                                                                                                          | not classified                                                                                                 | not classified                                                                                                                                                                                                                                                                  |
| myelin transcription factor 1-like isoform 3               | Myt11         | NP_001087247 | 133      | 1             | nucleus                                                                                                                                                                                                                                                                                 | DNA binding, metal ion binding, protein binding, transcription factor activity, zinc ion binding               | cell differentiation, multicellular organismal development, nervous system development, regulation of transcription, regulation of transcription, DNA-dependent, transcription                                                                                                  |
| hypothetical protein LOC69126                              | 1810022K09Rik | NP_001093144 | 11       | 1             | not classified                                                                                                                                                                                                                                                                          | not classified                                                                                                 | not classified                                                                                                                                                                                                                                                                  |
| cytochrome P450, family 2, subfamily j, polypeptide 12     | Cyp2j12       | NP_001093652 | 58       | 1             | not classified                                                                                                                                                                                                                                                                          | not classified                                                                                                 | not classified                                                                                                                                                                                                                                                                  |
| SREBF chaperone                                            | Scap          | NP_001096632 | 140      | 1             | cytoplasmic vesicle, endoplasmic reticulum, endoplasmic reticulum membrane, Golgi apparatus, integral to membrane, membrane                                                                                                                                                             | cholesterol binding, protein binding                                                                           | cholesterol metabolic process, lipid metabolic process, regulation of cholesterol biosynthetic process, regulation of fatty acid biosynthetic process, regulation of fatty acid metabolic process, response to hypoxia, response to insulin stimulus, steroid metabolic process |
| hypothetical protein LOC105351                             | AW209491      | NP_001098116 | 47       | 1             | not classified                                                                                                                                                                                                                                                                          | not classified                                                                                                 | not classified                                                                                                                                                                                                                                                                  |
| vomeronal receptor Vmn2r68                                 | Vmn2r68       | NP_001098651 | 98       | 1             | not classified                                                                                                                                                                                                                                                                          | not classified                                                                                                 | not classified                                                                                                                                                                                                                                                                  |
| vomeronal 2, receptor 78                                   | Vmn2r78       | NP_001098659 | 98       | 1             | not classified                                                                                                                                                                                                                                                                          | not classified                                                                                                 | not classified                                                                                                                                                                                                                                                                  |
| PHD finger protein 21A isoform 3                           | Phf21a        | NP_001103161 | 67       | 1             | histone deacetylase complex, nucleus                                                                                                                                                                                                                                                    | chromatin binding, DNA binding, metal ion binding, protein binding, zinc ion binding                           | chromatin modification, negative regulation of transcription from RNA polymerase II promoter, regulation of transcription, suckling behavior, transcription                                                                                                                     |
| post-synaptic density protein 95 isoform 2                 | Dlg4          | NP_001103222 | 80       | 1             | alpha-amino-3-hydroxy-5-methyl-4-isoxazolepropionic acid selective glutamate receptor complex, cell junction, cytoplasm, extrinsic to internal side of plasma membrane, membrane, membrane fraction, plasma membrane, postsynaptic density, postsynaptic membrane, synapse, synaptosome | neurexin binding, protein binding, structural molecule activity                                                | locomotory behavior, regulation of long-term neuronal synaptic plasticity, response to cocaine, synaptic vesicle maturation                                                                                                                                                     |

| Protein Name                                                   | Gene Name | Accession No | Mw (kDa) | Peptide Count | GO Component                                                                                                                                                                                           | GO Function                                                                                                                                                                                                                                                                                                                                                                                                                                                                                              | GO Process                                                                                                                                                                                                                                                                                                                                                                                                                                                                                                                                                                                                                                                                                                                                                                                                                                                                                                |
|----------------------------------------------------------------|-----------|--------------|----------|---------------|--------------------------------------------------------------------------------------------------------------------------------------------------------------------------------------------------------|----------------------------------------------------------------------------------------------------------------------------------------------------------------------------------------------------------------------------------------------------------------------------------------------------------------------------------------------------------------------------------------------------------------------------------------------------------------------------------------------------------|-----------------------------------------------------------------------------------------------------------------------------------------------------------------------------------------------------------------------------------------------------------------------------------------------------------------------------------------------------------------------------------------------------------------------------------------------------------------------------------------------------------------------------------------------------------------------------------------------------------------------------------------------------------------------------------------------------------------------------------------------------------------------------------------------------------------------------------------------------------------------------------------------------------|
| ATPase, Cu++ transporting, alpha polypeptide isoform 1         | Atp7a     | NP_001103227 | 162      | 1             | cell soma, cytoplasmic vesicle, Golgi apparatus, integral to membrane, integral to membrane of membrane fraction, membrane, membrane fraction, neuron projection, plasma membrane, trans-Golgi network | ATP binding, ATPase activity, coupled to transmembrane movement of ions, phosphorylative mechanism, catalytic activity, copper ion binding, copper ion transmembrane transporter activity, copper-exporting ATPase activity, hydrolase activity, acting on acid anhydrides, catalyzing transmembrane movement of substances, magnesium ion binding, metal ion binding, metal ion transmembrane transporter activity, nucleotide binding, protein binding, superoxide dismutase copper chaperone activity | ATP biosynthetic process, ATP metabolic process, blood vessel development, blood vessel remodeling, cartilage development, catecholamine metabolic process, cellular copper ion homeostasis, central nervous system neuron development, cerebellar Purkinje cell differentiation, collagen fibril organization, copper ion export, copper ion import, copper ion transport, dendrite morphogenesis, detoxification of copper ion, dopamine metabolic process, elastic fiber assembly, elastin biosynthetic process, epinephrine metabolic process, extracellular matrix organization, hair follicle morphogenesis, hindlimb morphogenesis, ion transport, locomotory behavior, lung alveolus development, metabolic process, metal ion transport, mitochondrion organization, negative regulation of metalloenzyme activity, neuron projection morphogenesis, neuroprotection, <del>neuroprotection</del> |
| calpain 3 isoform b                                            | Capn3     | NP_001103231 | 82       | 1             | cytoplasm, intracellular                                                                                                                                                                               | calcium ion binding, calcium-dependent cysteine-type endopeptidase activity, cysteine-type endopeptidase activity, cysteine-type peptidase activity, hydrolase activity, peptidase activity, protein binding                                                                                                                                                                                                                                                                                             | myofibril assembly, proteolysis, sarcomere organization                                                                                                                                                                                                                                                                                                                                                                                                                                                                                                                                                                                                                                                                                                                                                                                                                                                   |
| procollagen, type XVIII, alpha 1 isoform 1                     | Col18a1   | NP_001103461 | 156      | 1             | basement membrane, extracellular matrix, extracellular region, proteinaceous extracellular matrix                                                                                                      | binding, extracellular matrix structural constituent, metal ion binding, protein binding, structural molecule activity, zinc ion binding                                                                                                                                                                                                                                                                                                                                                                 | angiogenesis, cell adhesion, endothelial cell morphogenesis, extracellular matrix organization, positive regulation of apoptosis, positive regulation of cell migration, positive regulation of cell proliferation                                                                                                                                                                                                                                                                                                                                                                                                                                                                                                                                                                                                                                                                                        |
| elongation factor Tu GTP binding domain containing 2 isoform b | Eftud2    | NP_001103465 | 109      | 1             | nucleus, spliceosomal complex                                                                                                                                                                          | GTP binding, GTPase activity, nucleotide binding, protein binding, translation elongation factor activity                                                                                                                                                                                                                                                                                                                                                                                                | mRNA processing, RNA splicing                                                                                                                                                                                                                                                                                                                                                                                                                                                                                                                                                                                                                                                                                                                                                                                                                                                                             |
| WD repeat domain 36 isoform 2                                  | Wdr36     | NP_001103486 | 98       | 1             | cellular_component                                                                                                                                                                                     | molecular_function                                                                                                                                                                                                                                                                                                                                                                                                                                                                                       | biological_process                                                                                                                                                                                                                                                                                                                                                                                                                                                                                                                                                                                                                                                                                                                                                                                                                                                                                        |
| capicua homolog isoform c                                      | Cic       | NP_001103602 | 164      | 1             | nucleus                                                                                                                                                                                                | DNA binding                                                                                                                                                                                                                                                                                                                                                                                                                                                                                              | regulation of transcription, transcription                                                                                                                                                                                                                                                                                                                                                                                                                                                                                                                                                                                                                                                                                                                                                                                                                                                                |

| Protein Name                                                                     | Gene Name          | Accession No | Mw (kDa) | Peptide Count | GO Component                                                                                                | GO Function                                                                                                                                                                                                                                                                                                                                                                          | GO Process                                                                                                                                                                                                                                                                                               |
|----------------------------------------------------------------------------------|--------------------|--------------|----------|---------------|-------------------------------------------------------------------------------------------------------------|--------------------------------------------------------------------------------------------------------------------------------------------------------------------------------------------------------------------------------------------------------------------------------------------------------------------------------------------------------------------------------------|----------------------------------------------------------------------------------------------------------------------------------------------------------------------------------------------------------------------------------------------------------------------------------------------------------|
| ATPase, Ca <sup>++</sup> transporting, cardiac muscle, slow twitch 2 isoform a   | Atp2a2             | NP_001103610 | 115      | 1             | endoplasmic reticulum, integral to membrane, membrane, membrane fraction, microsome, sarcoplasmic reticulum | ATP binding, ATPase activity, coupled to transmembrane movement of ions, phosphorylative mechanism, calcium ion binding, calcium-transporting ATPase activity, catalytic activity, hydrolase activity, hydrolase activity, acting on acid anhydrides, catalyzing transmembrane movement of substances, magnesium ion binding, metal ion binding, nucleotide binding, protein binding | ATP biosynthetic process, calcium ion transport, cation transport, cellular calcium ion homeostasis, ER-nuclear signaling pathway, ion transport, metabolic process, negative regulation of heart contraction, regulation of muscle contraction, regulation of the force of heart contraction, transport |
| GRB10 interacting GYF protein 2 isoform b                                        | Gigyf2             | NP_001103682 | 149      | 1             | not classified                                                                                              | not classified                                                                                                                                                                                                                                                                                                                                                                       | not classified                                                                                                                                                                                                                                                                                           |
| protein phosphatase 1H (PP2C domain containing) isoform 1                        | Ppm1h              | NP_001103688 | 56       | 1             | protein serine/threonine phosphatase complex                                                                | catalytic activity, hydrolase activity, phosphoprotein phosphatase activity, protein serine/threonine phosphatase activity                                                                                                                                                                                                                                                           | protein amino acid dephosphorylation                                                                                                                                                                                                                                                                     |
| calpain 1, large subunit                                                         | Capn1              | NP_001103974 | 82       | 1             | cytoplasm, intracellular, membrane, plasma membrane                                                         | calcium ion binding, calcium-dependent cysteine-type endopeptidase activity, cysteine-type endopeptidase activity, cysteine-type peptidase activity, hydrolase activity, peptidase activity                                                                                                                                                                                          | proteolysis                                                                                                                                                                                                                                                                                              |
| predicted gene, EG665615                                                         | EG665615           | NP_001104249 | 14       | 1             | not classified                                                                                              | not classified                                                                                                                                                                                                                                                                                                                                                                       | not classified                                                                                                                                                                                                                                                                                           |
| zinc finger protein 661                                                          | Zfp661             | NP_001104499 | 49       | 1             | intracellular, nucleus                                                                                      | DNA binding, metal ion binding, nucleic acid binding, zinc ion binding                                                                                                                                                                                                                                                                                                               | regulation of transcription, regulation of transcription, DNA-dependent, transcription                                                                                                                                                                                                                   |
| serine (or cysteine) proteinase inhibitor, clade H, member 1                     | Serpinh1           | NP_001104514 | 47       | 1             | cytoplasm, endoplasmic reticulum                                                                            | protein binding, serine-type endopeptidase inhibitor activity, unfolded protein binding                                                                                                                                                                                                                                                                                              | collagen biosynthetic process, collagen fibril organization, protein maturation, response to stress                                                                                                                                                                                                      |
| autophagy related 16 like 2                                                      | Atg16l2            | NP_001104581 | 69       | 1             | cytoplasm                                                                                                   | not classified                                                                                                                                                                                                                                                                                                                                                                       | autophagy, protein transport, transport                                                                                                                                                                                                                                                                  |
| hypothetical protein LOC209550                                                   | EG209550           | NP_001104588 | 112      | 1             | not classified                                                                                              | not classified                                                                                                                                                                                                                                                                                                                                                                       | not classified                                                                                                                                                                                                                                                                                           |
| eukaryotic translation initiation factor 2B, subunit 3 gamma isoform 1           | Eif2b3             | NP_001104747 | 50       | 1             | eukaryotic translation initiation factor 2B complex                                                         | guanyl-nucleotide exchange factor activity, protein binding, translation initiation factor activity                                                                                                                                                                                                                                                                                  | biological_process                                                                                                                                                                                                                                                                                       |
| predicted gene, ENSMUSG00000059775                                               | ENSMUSG00000059775 | NP_001104770 | 13       | 1             | not classified                                                                                              | not classified                                                                                                                                                                                                                                                                                                                                                                       | not classified                                                                                                                                                                                                                                                                                           |
| leucine rich repeat (in FLII) interacting protein 1 isoform 1                    | Lrrfip1            | NP_001104781 | 79       | 1             | cytoplasm, nucleus                                                                                          | DNA binding, protein binding                                                                                                                                                                                                                                                                                                                                                         | regulation of transcription, transcription                                                                                                                                                                                                                                                               |
| neural precursor cell expressed, developmentally down-regulated gene 9 isoform 1 | Nedd9              | NP_001104794 | 93       | 1             | cytoplasm, cytoskeleton, nucleus                                                                            | protein binding                                                                                                                                                                                                                                                                                                                                                                      | cell adhesion, cell cycle, cell division, mitosis, regulation of growth                                                                                                                                                                                                                                  |
| predicted gene, ENSMUSG00000044330                                               | ENSMUSG00000044330 | NP_001106138 | 10       | 1             | not classified                                                                                              | not classified                                                                                                                                                                                                                                                                                                                                                                       | not classified                                                                                                                                                                                                                                                                                           |
| a disintegrin and metalloprotease domain 12                                      | Adam12             | NP_031426    | 99       | 1             | integral to membrane, membrane, plasma membrane, proteinaceous extracellular matrix                         | hydrolase activity, metal ion binding, metalloendopeptidase activity, metallopeptidase activity, peptidase activity, protein binding, SH3 domain binding, zinc ion binding                                                                                                                                                                                                           | cell adhesion, proteolysis                                                                                                                                                                                                                                                                               |

| Protein Name                                  | Gene Name | Accession No | Mw (kDa) | Peptide Count | GO Component                                                                                                                            | GO Function                                                                                                                                                                                                    | GO Process                                                                                                                                                                                                                                                                                                                                                                                                                                                                                                                                                                                                                                                                                                                                                                                                                                                                                          |
|-----------------------------------------------|-----------|--------------|----------|---------------|-----------------------------------------------------------------------------------------------------------------------------------------|----------------------------------------------------------------------------------------------------------------------------------------------------------------------------------------------------------------|-----------------------------------------------------------------------------------------------------------------------------------------------------------------------------------------------------------------------------------------------------------------------------------------------------------------------------------------------------------------------------------------------------------------------------------------------------------------------------------------------------------------------------------------------------------------------------------------------------------------------------------------------------------------------------------------------------------------------------------------------------------------------------------------------------------------------------------------------------------------------------------------------------|
| poly (ADP-ribose) polymerase family, member 1 | Parp1     | NP_031441    | 113      | 1             | intracellular, nucleolus, nucleoplasm, nucleus                                                                                          | DNA binding, metal ion binding, NAD or NADH binding, NAD+ ADP-ribosyltransferase activity, protein binding, transferase activity, transference activity, transferring glycosyl groups, zinc ion binding        | base-excision repair, DNA metabolic process, DNA repair, protein amino acid ADP-ribosylation, regulation of growth rate, response to DNA damage stimulus, telomere maintenance                                                                                                                                                                                                                                                                                                                                                                                                                                                                                                                                                                                                                                                                                                                      |
| adenomatous polyposis coli                    | Apc       | NP_031488    | 311      | 1             | axon part, cell projection, cell projection membrane, cytoplasm, cytoplasmic microtubule, growth cone, lateral plasma membrane, nucleus | beta-catenin binding, binding, microtubule binding, protein binding                                                                                                                                            | anterior/posterior pattern formation, axis specification, axonogenesis, cell migration, chromosome organization, cytokinesis after mitosis, dorsal/ventral pattern formation, hair follicle development, kidney development, mitotic cell cycle spindle assembly checkpoint, mitotic metaphase/anaphase transition, muscle maintenance, negative regulation of apoptosis, negative regulation of cell proliferation, negative regulation of epithelial cell proliferation, negative regulation of epithelial cell proliferation involved in prostate gland development, negative regulation of MAPKKK cascade, negative regulation of microtubule depolymerization, negative regulation of odontogenesis, negative regulation of Wnt receptor signaling pathway, pattern specification process, positive regulation of apoptosis, positive regulation of cell adhesion, positive regulation of cell |
| aquaporin 1                                   | Aqp1      | NP_031498    | 29       | 1             | integral to membrane, integral to plasma membrane, membrane                                                                             | transporter activity, water channel activity                                                                                                                                                                   | transport, water transport                                                                                                                                                                                                                                                                                                                                                                                                                                                                                                                                                                                                                                                                                                                                                                                                                                                                          |
| asialoglycoprotein receptor 2                 | Asgr2     | NP_031519    | 35       | 1             | integral to membrane, membrane                                                                                                          | binding, calcium ion binding, receptor activity, sugar binding                                                                                                                                                 | endocytosis, glycoprotein metabolic process, lipid homeostasis, regulation of protein stability                                                                                                                                                                                                                                                                                                                                                                                                                                                                                                                                                                                                                                                                                                                                                                                                     |
| ataxia telangiectasia mutated homolog         | Atm       | NP_031525    | 349      | 1             | cytoplasmic vesicle, nucleoplasm, nucleus, spindle                                                                                      | ATP binding, DNA binding, kinase activity, nucleotide binding, phosphotransferase activity, alcohol group as acceptor, protein kinase activity, protein serine/threonine kinase activity, transferase activity | brain development, cell cycle, DNA damage checkpoint, DNA damage response, signal transduction resulting in induction of apoptosis, DNA repair, female gamete generation, heart development, lipoprotein catabolic process, negative regulation of apoptosis, neuron apoptosis, positive regulation of neuron apoptosis, protein amino acid phosphorylation, response to DNA damage stimulus, response to ionizing radiation, somitogenesis                                                                                                                                                                                                                                                                                                                                                                                                                                                         |

| Protein Name                                           | Gene Name | Accession No | Mw (kDa) | Peptide Count | GO Component                                                                                            | GO Function                                                                                                                                                                                             | GO Process                                                                                                                                                                                |
|--------------------------------------------------------|-----------|--------------|----------|---------------|---------------------------------------------------------------------------------------------------------|---------------------------------------------------------------------------------------------------------------------------------------------------------------------------------------------------------|-------------------------------------------------------------------------------------------------------------------------------------------------------------------------------------------|
| baculoviral IAP repeat-containing 6                    | Birc6     | NP_031592    | 529      | 1             | membrane fraction                                                                                       | protein binding, ubiquitin-protein ligase activity                                                                                                                                                      | anti-apoptosis, labyrinthine layer development, positive regulation of cell proliferation, protein ubiquitination, regulation of cell proliferation, spongiotrophoblast layer development |
| caspase 11                                             | Casp4     | NP_031635    | 43       | 1             | intracellular                                                                                           | cysteine-type endopeptidase activity, cysteine-type peptidase activity, hydrolase activity, peptidase activity, protein binding                                                                         | apoptosis, induction of apoptosis, negative regulation of apoptosis, proteolysis, regulation of apoptosis                                                                                 |
| cadherin 15                                            | Cdh15     | NP_031688    | 86       | 1             | integral to membrane, membrane, neuromuscular junction, plasma membrane                                 | calcium ion binding, protein binding                                                                                                                                                                    | cell adhesion, homophilic cell adhesion                                                                                                                                                   |
| cofilin 2, muscle                                      | Cfl2      | NP_031714    | 19       | 1             | cytoplasm, cytoskeleton, intracellular, nucleus                                                         | actin binding                                                                                                                                                                                           | not classified                                                                                                                                                                            |
| procollagen, type IV, alpha 4                          | Col4a4    | NP_031761    | 164      | 1             | basement membrane, collagen, collagen type IV, extracellular region, proteinaceous extracellular matrix | extracellular matrix structural constituent                                                                                                                                                             | not classified                                                                                                                                                                            |
| cryptochrome 1 (photolyase-like)                       | Cry1      | NP_031797    | 68       | 1             | cytoplasm, nucleus                                                                                      | DNA photolyase activity, nucleotide binding, photoreceptor activity, protein binding, receptor activity                                                                                                 | circadian rhythm, DNA repair, protein-chromophore linkage, regulation of transcription, response to stimulus, rhythmic process, transcription                                             |
| cystatin B                                             | Cstb      | NP_031819    | 11       | 1             | cytoplasm, intracellular, nucleus                                                                       | cysteine-type endopeptidase inhibitor activity, endopeptidase inhibitor activity, peptidase inhibitor activity, protease binding                                                                        | adult locomotory behavior                                                                                                                                                                 |
| cytochrome P450, family 2, subfamily b, polypeptide 13 | Cyp2b13   | NP_031839    | 56       | 1             | not classified                                                                                          | iron ion binding, metal ion binding, monooxygenase activity, oxidoreductase activity                                                                                                                    | oxidation reduction                                                                                                                                                                       |
| receptor accessory protein 5                           | Reep5     | NP_031900    | 21       | 1             | integral to membrane, membrane                                                                          | protein binding, receptor activity                                                                                                                                                                      | not classified                                                                                                                                                                            |
| eukaryotic elongation factor-2 kinase                  | Eef2k     | NP_031934    | 82       | 1             | not classified                                                                                          | ATP binding, binding, calcium ion binding, calmodulin binding, elongation factor-2 kinase activity, kinase activity, nucleotide binding, protein serine/threonine kinase activity, transferase activity | protein amino acid phosphorylation                                                                                                                                                        |
| eukaryotic translation initiation factor 4E            | Eif4e     | NP_031943    | 25       | 1             | cytoplasm                                                                                               | protein binding, RNA binding, translation initiation factor activity                                                                                                                                    | regulation of translation, translation, translational initiation                                                                                                                          |



| Protein Name                                   | Gene Name | Accession No | Mw (kDa) | Peptide Count | GO Component                                                      | GO Function                                                                                                                                         | GO Process                                                                                                                                                                                                                                                                                                                                                                                                 |
|------------------------------------------------|-----------|--------------|----------|---------------|-------------------------------------------------------------------|-----------------------------------------------------------------------------------------------------------------------------------------------------|------------------------------------------------------------------------------------------------------------------------------------------------------------------------------------------------------------------------------------------------------------------------------------------------------------------------------------------------------------------------------------------------------------|
| E74-like factor 3                              | Elf3      | NP_031947    | 42       | 1             | cytoplasm, nucleus                                                | DNA binding, sequence-specific DNA binding, transcription factor activity                                                                           | anatomical structure morphogenesis, cell differentiation, embryonic development, extracellular matrix organization, inflammatory response, mammary gland involution, multicellular organismal development, regulation of transcription, regulation of transcription, DNA-dependent, transcription                                                                                                          |
| endonuclease G                                 | Endog     | NP_031957    | 32       | 1             | mitochondrion                                                     | endonuclease activity, hydrolase activity, magnesium ion binding, manganese ion binding, metal ion binding, nuclease activity, nucleic acid binding | DNA fragmentation involved in apoptosis, in utero embryonic development, positive regulation of apoptosis, response to antibiotic, response to tumor necrosis factor                                                                                                                                                                                                                                       |
| epoxide hydrolase 2, cytoplasmic               | Ephx2     | NP_031966    | 63       | 1             | cytoplasm, peroxisome                                             | catalytic activity, epoxide hydrolase activity, hydrolase activity, magnesium ion binding, metal ion binding                                        | aromatic compound catabolic process, metabolic process, response to toxin                                                                                                                                                                                                                                                                                                                                  |
| enhancer of rudimentary homolog                | Erh       | NP_031977    | 12       | 1             | not classified                                                    | molecular_function                                                                                                                                  | cell cycle                                                                                                                                                                                                                                                                                                                                                                                                 |
| ecotropic viral integration site 5             | Evi5      | NP_031990    | 93       | 1             | intracellular, nucleus                                            | Rab GTPase activator activity                                                                                                                       | cell cycle, cell division, regulation of Rab GTPase activity                                                                                                                                                                                                                                                                                                                                               |
| coagulation factor V                           | F5        | NP_032002    | 247      | 1             | extracellular region, extracellular space, platelet alpha granule | calcium ion binding, copper ion binding, metal ion binding, molecular_function, oxidoreductase activity                                             | blood circulation, blood coagulation, cell adhesion, oxidation reduction                                                                                                                                                                                                                                                                                                                                   |
| fibulin 2 isoform a                            | Fbln2     | NP_032018    | 132      | 1             | extracellular region, proteinaceous extracellular matrix          | calcium ion binding, extracellular matrix binding, protein binding                                                                                  | positive regulation of cell-substrate adhesion                                                                                                                                                                                                                                                                                                                                                             |
| fibroblast growth factor 17                    | Fgf17     | NP_032030    | 25       | 1             | extracellular region                                              | growth factor activity                                                                                                                              | fibroblast growth factor receptor signaling pathway, positive regulation of cell proliferation                                                                                                                                                                                                                                                                                                             |
| structural maintenance of chromosomes 2-like 1 | Smc2      | NP_032043    | 134      | 1             | chromosome, cytoplasm, nucleus                                    | ATP binding, nucleotide binding, protein binding                                                                                                    | cell cycle, cell division, chromosome condensation, chromosome organization, mitosis                                                                                                                                                                                                                                                                                                                       |
| flotillin 1                                    | Flot1     | NP_032053    | 48       | 1             | flotillin complex, membrane, membrane raft, plasma membrane       | molecular_function, protein binding                                                                                                                 | biological_process                                                                                                                                                                                                                                                                                                                                                                                         |
| acid alpha-glucosidase                         | Gaa       | NP_032090    | 106      | 1             | lysosome                                                          | alpha-glucosidase activity, hydrolase activity, hydrolase activity, acting on glycosyl bonds, hydrolase activity, hydrolyzing O-glycosyl compounds  | carbohydrate metabolic process, diaphragm contraction, glycogen catabolic process, glycogen metabolic process, heart morphogenesis, locomotory behavior, lysosome organization, metabolic process, muscle maintenance, neuromuscular process controlling balance, neuromuscular process controlling posture, regulation of the force of heart contraction, striated muscle contraction, tissue development |

| Protein Name                                              | Gene Name | Accession No | Mw (kDa) | Peptide Count | GO Component                                                                                                             | GO Function                                                                                                                                                                                                                                           | GO Process                                                                                                                                                        |
|-----------------------------------------------------------|-----------|--------------|----------|---------------|--------------------------------------------------------------------------------------------------------------------------|-------------------------------------------------------------------------------------------------------------------------------------------------------------------------------------------------------------------------------------------------------|-------------------------------------------------------------------------------------------------------------------------------------------------------------------|
| gamma-aminobutyric acid (GABA) receptor, rho 1            | Gabbr1    | NP_032101    | 55       | 1             | cell junction, chloride channel complex, integral to membrane, membrane, plasma membrane, postsynaptic membrane, synapse | chloride channel activity, chloride ion binding, extracellular ligand-gated ion channel activity, GABA-A receptor activity, ion channel activity                                                                                                      | ion transport, transport                                                                                                                                          |
| glutamic acid decarboxylase 1                             | Gad1      | NP_032103    | 67       | 1             | axon, cytoplasm, mitochondrion, synapse                                                                                  | carboxy-lyase activity, catalytic activity, glutamate decarboxylase activity, lyase activity, pyridoxal phosphate binding                                                                                                                             | carboxylic acid metabolic process, neurotransmitter biosynthetic process                                                                                          |
| Golgi autoantigen, golgin subfamily a, 3                  | Golga3    | NP_032172    | 163      | 1             | cytoplasm, ER-Golgi intermediate compartment, Golgi apparatus, Golgi membrane, membrane                                  | protein binding                                                                                                                                                                                                                                       | cell differentiation, multicellular organismal development, spermatogenesis                                                                                       |
| glutamate receptor, ionotropic, delta 1                   | Grid1     | NP_032192    | 112      | 1             | cell junction, integral to membrane, membrane, plasma membrane, postsynaptic membrane, synapse                           | extracellular-glutamate-gated ion channel activity, ion channel activity, ionotropic glutamate receptor activity, protein binding, receptor activity                                                                                                  | ion transport, transport                                                                                                                                          |
| glutathione S-transferase, alpha 1 (Ya)                   | Gsta1     | NP_032207    | 26       | 1             | not classified                                                                                                           | glutathione transferase activity, transferase activity                                                                                                                                                                                                | glutathione metabolic process, metabolic process                                                                                                                  |
| host cell factor C1                                       | Hcfc1     | NP_032250    | 210      | 1             | cytoplasm, nucleus                                                                                                       | transcription coactivator activity                                                                                                                                                                                                                    | cell cycle, reactivation of latent virus                                                                                                                          |
| hyperpolarization-activated, cyclic nucleotide-gated K+ 2 | Hcn2      | NP_032252    | 95       | 1             | integral to membrane, membrane                                                                                           | cAMP binding, ion channel activity, nucleotide binding, potassium channel activity, potassium ion binding, protein binding, sodium channel activity, sodium ion binding, voltage-gated ion channel activity, voltage-gated potassium channel activity | ion transport, potassium ion transport, regulation of membrane potential, sodium ion transport, transport                                                         |
| hepatoma-derived growth factor                            | Hdgf      | NP_032257    | 26       | 1             | cytoplasm, extracellular space, nucleus                                                                                  | DNA binding, growth factor activity, heparin binding, nucleotide binding                                                                                                                                                                              | cellular process, regulation of transcription, transcription                                                                                                      |
| histidine triad nucleotide binding protein 1              | Hint1     | NP_032274    | 14       | 1             | cytoplasm, nucleus                                                                                                       | hydrolase activity                                                                                                                                                                                                                                    | not classified                                                                                                                                                    |
| high mobility group box 2                                 | Hmgb2     | NP_032278    | 24       | 1             | chromosome, nucleus                                                                                                      | DNA binding                                                                                                                                                                                                                                           | male gonad development, positive regulation of gene-specific transcription from RNA polymerase II promoter, response to steroid hormone stimulus, spermatogenesis |
| lipase, hepatic                                           | Lipc      | NP_032306    | 57       | 1             | extracellular region, extracellular space, high-density lipoprotein particle                                             | catalytic activity, heparin binding, hydrolase activity, lipase activity, triacylglycerol lipase activity                                                                                                                                             | cholesterol homeostasis, cholesterol metabolic process, cholesterol transport, lipid catabolic process, lipid metabolic process                                   |
| histamine receptor H1                                     | Hrh1      | NP_032311    | 56       | 1             | integral to membrane, membrane, plasma membrane                                                                          | G-protein coupled receptor activity, histamine receptor activity, receptor activity, signal transducer activity                                                                                                                                       | G-protein coupled receptor protein signaling pathway, rhythmic process, signal transduction                                                                       |
| histamine receptor H 2 isoform 2                          | Hrh2      | NP_032312    | 40       | 1             | integral to membrane, membrane, plasma membrane                                                                          | G-protein coupled receptor activity, histamine receptor activity, receptor activity, signal transducer activity                                                                                                                                       | G-protein coupled receptor protein signaling pathway, signal transduction                                                                                         |

| Protein Name                       | Gene Name | Accession No | Mw (kDa) | Peptide Count | GO Component                                                                                                                                   | GO Function                                                                                                                        | GO Process                                                                                                                                                                                                                                                                                                                                                                      |
|------------------------------------|-----------|--------------|----------|---------------|------------------------------------------------------------------------------------------------------------------------------------------------|------------------------------------------------------------------------------------------------------------------------------------|---------------------------------------------------------------------------------------------------------------------------------------------------------------------------------------------------------------------------------------------------------------------------------------------------------------------------------------------------------------------------------|
| interferon alpha 11 precursor      | Ifna11    | NP_032359    | 22       | 1             | extracellular region, extracellular space                                                                                                      | cytokine activity, cytokine receptor binding                                                                                       | defense response, response to virus                                                                                                                                                                                                                                                                                                                                             |
| interleukin 12 receptor, beta 1    | Il12rb1   | NP_032379    | 82       | 1             | external side of plasma membrane, integral to membrane, membrane                                                                               | cytokine receptor activity, receptor activity                                                                                      | peptidyl-tyrosine phosphorylation                                                                                                                                                                                                                                                                                                                                               |
| integrin alpha 6                   | Itga6     | NP_032423    | 120      | 1             | basolateral plasma membrane, cell surface, external side of plasma membrane, integral to membrane, integrin complex, membrane, plasma membrane | calcium ion binding, integrin binding, protein binding, receptor activity                                                          | brown fat cell differentiation, cell adhesion, cell adhesion mediated by integrin, cell-matrix adhesion, cellular response to extracellular stimulus, filopodium assembly, integrin-mediated signaling pathway, leukocyte migration, odontogenesis of dentine-containing tooth, positive regulation of cell-cell adhesion                                                       |
| ketoheokinase                      | Khk       | NP_032465    | 33       | 1             | not classified                                                                                                                                 | ATP binding, ketoheokinase activity, kinase activity, nucleotide binding, transferase activity                                     | carbohydrate metabolic process                                                                                                                                                                                                                                                                                                                                                  |
| kinesin family member 1B isoform a | Kif1b     | NP_032467    | 130      | 1             | cytoplasm, cytoplasmic vesicle, cytoplasmic vesicle membrane, cytoskeleton, microtubule, microtubule associated complex, mitochondrion         | ATP binding, ATPase activity, microtubule binding, microtubule motor activity, motor activity, nucleotide binding, protein binding | anterograde axon cargo transport, cytoskeleton-dependent intracellular transport, embryonic development, microtubule-based movement, mitochondrion transport along microtubule, nerve-nerve synaptic transmission, neuromuscular synaptic transmission                                                                                                                          |
| kinesin family member 4            | Kif4      | NP_032472    | 140      | 1             | microtubule, nucleus                                                                                                                           | ATP binding, DNA binding, microtubule motor activity, motor activity, nucleotide binding                                           | microtubule-based movement                                                                                                                                                                                                                                                                                                                                                      |
| karyopherin (importin) alpha 1     | Kpna1     | NP_032491    | 60       | 1             | cytoplasm, nuclear pore, nucleus                                                                                                               | binding, protein transporter activity                                                                                              | intracellular protein transport, protein import into nucleus, protein transport, transport                                                                                                                                                                                                                                                                                      |
| kinectin 1                         | Ktn1      | NP_032503    | 153      | 1             | endoplasmic reticulum, integral to membrane, membrane                                                                                          | kinesin binding                                                                                                                    | microtubule-based movement                                                                                                                                                                                                                                                                                                                                                      |
| laminin, alpha 1 precursor         | Lama1     | NP_032506    | 338      | 1             | basal lamina, basement membrane, extracellular matrix, extracellular region, laminin-1 complex, proteinaceous extracellular matrix             | extracellular matrix structural constituent, protein binding, receptor binding                                                     | branching involved in lung morphogenesis, branching involved in salivary gland morphogenesis, cell adhesion, cell surface receptor linked signal transduction, establishment of epithelial cell apical/basal polarity, morphogenesis of an epithelial sheet, regulation of cell adhesion, regulation of cell migration, regulation of embryonic development, tissue development |

| Protein Name                                                   | Gene Name | Accession No | Mw (kDa) | Peptide Count | GO Component                                                                                       | GO Function                                                                                                                                                                                                  | GO Process                                                                                                                                                 |
|----------------------------------------------------------------|-----------|--------------|----------|---------------|----------------------------------------------------------------------------------------------------|--------------------------------------------------------------------------------------------------------------------------------------------------------------------------------------------------------------|------------------------------------------------------------------------------------------------------------------------------------------------------------|
| low density lipoprotein receptor-related protein 1             | Lrp1      | NP_032538    | 505      | 1             | coated pit, cytoplasm, integral to membrane, membrane, membrane fraction, nucleus, plasma membrane | calcium ion binding, metal ion binding, receptor activity                                                                                                                                                    | apoptotic cell clearance, endocytosis, multicellular organismal development, negative regulation of Wnt receptor signaling pathway                         |
| lumican                                                        | Lum       | NP_032550    | 38       | 1             | extracellular region, proteinaceous extracellular matrix                                           | protein binding                                                                                                                                                                                              | not classified                                                                                                                                             |
| killer cell lectin-like receptor subfamily B member 1C         | Klrb1c    | NP_032553    | 25       | 1             | external side of plasma membrane, integral to membrane, integral to plasma membrane, membrane      | binding, protein homodimerization activity, receptor activity, sugar binding                                                                                                                                 | positive regulation of natural killer cell mediated cytotoxicity                                                                                           |
| minichromosome maintenance deficient 2 mitotin                 | Mcm2      | NP_032590    | 102      | 1             | nuclear origin of replication recognition complex, nucleus                                         | ATP binding, DNA binding, DNA replication origin binding, metal ion binding, nucleotide binding, protein binding, zinc ion binding                                                                           | cell cycle, DNA replication, DNA replication initiation, DNA unwinding during replication, nucleosome assembly, regulation of transcription, transcription |
| minichromosome maintenance deficient 5, cell division cycle 46 | Mcm5      | NP_032592    | 82       | 1             | nucleus                                                                                            | ATP binding, DNA binding, nucleotide binding                                                                                                                                                                 | cell division, DNA replication, DNA replication initiation, regulation of transcription, transcription                                                     |
| transformed mouse 3T3 cell double minute 4                     | Mdm4      | NP_032601    | 55       | 1             | intracellular, nucleus                                                                             | metal ion binding, protein binding, zinc ion binding                                                                                                                                                         | positive regulation of cell proliferation                                                                                                                  |
| ATP-binding cassette, sub-family C, member 1                   | Abcc1     | NP_032602    | 171      | 1             | integral to membrane, integral to plasma membrane, membrane, plasma membrane                       | ATP binding, ATPase activity, ATPase activity, coupled to transmembrane movement of substances, hydrolase activity, nucleoside-triphosphatase activity, nucleotide binding, transporter activity             | transport                                                                                                                                                  |
| matrix metalloproteinase 15                                    | Mmp15     | NP_032635    | 75       | 1             | integral to membrane, membrane, proteinaceous extracellular matrix                                 | calcium ion binding, hydrolase activity, metal ion binding, metalloproteinase activity, metalloproteinase activity, peptidase activity, zinc ion binding                                                     | metabolic process, proteolysis                                                                                                                             |
| meiosis-specific nuclear structural protein 1                  | Mns1      | NP_032639    | 60       | 1             | intermediate filament, nuclear envelope, nucleus                                                   | not classified                                                                                                                                                                                               | meiosis                                                                                                                                                    |
| membrane protein, palmitoylated                                | Mpp1      | NP_032647    | 52       | 1             | cell projection, cortical cytoskeleton, membrane                                                   | protein binding                                                                                                                                                                                              | not classified                                                                                                                                             |
| mannose receptor, C type 1                                     | Mrc1      | NP_032651    | 165      | 1             | cell surface, integral to membrane, membrane                                                       | binding, calcium ion binding, mannose binding, receptor activity, sugar binding, transmembrane receptor activity                                                                                             | endocytosis                                                                                                                                                |
| murinoglobulin 2                                               | Mug2      | NP_032672    | 162      | 1             | extracellular region, extracellular space                                                          | endopeptidase inhibitor activity, peptidase inhibitor activity, protein binding, serine-type endopeptidase inhibitor activity                                                                                | not classified                                                                                                                                             |
| kallikrein 1-related peptidase b3                              | Klk1b3    | NP_032719    | 29       | 1             | not classified                                                                                     | growth factor activity, hydrolase activity, metal ion binding, peptidase activity, receptor signaling protein activity, serine-type endopeptidase activity, serine-type peptidase activity, zinc ion binding | proteolysis                                                                                                                                                |

| Protein Name                                   | Gene Name | Accession No | Mw (kDa) | Peptide Count | GO Component                                                                          | GO Function                                                                                                            | GO Process                                                                                                                                                                                                                                                                                                                                                                                                                                                                                                                                                                                                                              |
|------------------------------------------------|-----------|--------------|----------|---------------|---------------------------------------------------------------------------------------|------------------------------------------------------------------------------------------------------------------------|-----------------------------------------------------------------------------------------------------------------------------------------------------------------------------------------------------------------------------------------------------------------------------------------------------------------------------------------------------------------------------------------------------------------------------------------------------------------------------------------------------------------------------------------------------------------------------------------------------------------------------------------|
| nidogen 2                                      | Nid2      | NP_032721    | 154      | 1             | basement membrane, extracellular region, membrane, proteinaceous extracellular matrix | calcium ion binding, protein binding                                                                                   | cell adhesion, cell-matrix adhesion                                                                                                                                                                                                                                                                                                                                                                                                                                                                                                                                                                                                     |
| nemo like kinase                               | Nlk       | NP_032728    | 58       | 1             | cytoplasm, nucleus                                                                    | kinase activity, metal ion binding, nucleotide binding, protein kinase activity, transferase activity                  | protein amino acid autophosphorylation, protein amino acid phosphorylation, transcription, Wnt receptor signaling pathway                                                                                                                                                                                                                                                                                                                                                                                                                                                                                                               |
| noggin                                         | Nog       | NP_032737    | 26       | 1             | extracellular region, extracellular space                                             | not classified                                                                                                         | anatomical structure formation involved in morphogenesis, BMP signaling pathway, brain development, cartilage development, cell differentiation, central nervous system development, in utero embryonic development, mesenchymal cell differentiation, multicellular organismal development, negative regulation of cell differentiation, notochord morphogenesis, pattern specification process, pituitary gland development, positive regulation of epithelial cell proliferation, prostatic bud formation, regulation of BMP signaling pathway, skeletal system development, ureteric bud development, urogenital system development |
| Niemann Pick type C1                           | Npc1      | NP_032746    | 143      | 1             | endosome, integral to membrane, lysosome, membrane                                    | hedgehog receptor activity, protein binding                                                                            | bile acid metabolic process, cholesterol efflux, cholesterol homeostasis, cholesterol transport, endocytosis, lysosomal transport, negative regulation of macroautophagy                                                                                                                                                                                                                                                                                                                                                                                                                                                                |
| catenin (cadherin associated protein), delta 2 | Ctnnd2    | NP_032755    | 135      | 1             | cell junction, nucleus                                                                | binding, protein binding                                                                                               | cell adhesion, learning, morphogenesis of a branching structure, multicellular organismal development, regulation of synaptic plasticity, regulation of transcription, transcription                                                                                                                                                                                                                                                                                                                                                                                                                                                    |
| outer dense fiber of sperm tails 1             | Odf1      | NP_032783    | 28       | 1             | outer dense fiber                                                                     | not classified                                                                                                         | cell differentiation, multicellular organismal development, spermatogenesis                                                                                                                                                                                                                                                                                                                                                                                                                                                                                                                                                             |
| immunoglobulin (CD79A) binding protein 1       | Igbbp1    | NP_032810    | 39       | 1             | cytoplasm                                                                             | not classified                                                                                                         | B cell activation, regulation of signal transduction, response to biotic stimulus                                                                                                                                                                                                                                                                                                                                                                                                                                                                                                                                                       |
| phospholipase A2 receptor 1                    | Pla2r1    | NP_032893    | 171      | 1             | extracellular region, integral to membrane, membrane, plasma membrane                 | binding, receptor activity, sugar binding                                                                              | endocytosis                                                                                                                                                                                                                                                                                                                                                                                                                                                                                                                                                                                                                             |
| cytosolic phospholipase A2, group IVA          | Pla2g4a   | NP_032895    | 85       | 1             | cytoplasm, cytoplasmic vesicle                                                        | calcium ion binding, hydrolase activity, lysophospholipase activity, phospholipase A2 activity, phospholipase activity | lipid catabolic process, phospholipid catabolic process, regulation of cell proliferation                                                                                                                                                                                                                                                                                                                                                                                                                                                                                                                                               |

| Protein Name                                               | Gene Name | Accession No | Mw (kDa) | Peptide Count | GO Component                                                                                                            | GO Function                                                                                                                                                                                                                                                                  | GO Process                                                                                                                                                                                                                                                |
|------------------------------------------------------------|-----------|--------------|----------|---------------|-------------------------------------------------------------------------------------------------------------------------|------------------------------------------------------------------------------------------------------------------------------------------------------------------------------------------------------------------------------------------------------------------------------|-----------------------------------------------------------------------------------------------------------------------------------------------------------------------------------------------------------------------------------------------------------|
| phospholipase C, beta 3                                    | Plcb3     | NP_032900    | 139      | 1             | nucleus                                                                                                                 | calcium ion binding, hydrolase activity, phosphoinositide phospholipase C activity, phospholipase C activity, phosphoric diester hydrolase activity, signal transducer activity                                                                                              | intracellular signaling cascade, lipid catabolic process, lipid metabolic process, signal transduction                                                                                                                                                    |
| cathepsin A isoform a                                      | Ctsa      | NP_032932    | 56       | 1             | lysosome, mitochondrion                                                                                                 | carboxypeptidase activity, hydrolase activity, peptidase activity, protein binding, serine-type carboxypeptidase activity                                                                                                                                                    | proteolysis                                                                                                                                                                                                                                               |
| periplakin                                                 | Ppl       | NP_032935    | 204      | 1             | cell junction, cytoplasm, cytoskeleton, extrinsic to plasma membrane, membrane, mitochondrion, nucleus, plasma membrane | protein binding                                                                                                                                                                                                                                                              | keratinization                                                                                                                                                                                                                                            |
| protein kinase, cAMP dependent regulatory, type II alpha   | Prkar2a   | NP_032950    | 46       | 1             | cAMP-dependent protein kinase complex                                                                                   | cAMP binding, cAMP-dependent protein kinase regulator activity, kinase activity, nucleotide binding, protein binding                                                                                                                                                         | regulation of protein amino acid phosphorylation, signal transduction                                                                                                                                                                                     |
| DnaJ (Hsp40) homolog, subfamily C, member 3B               | Dnajc3    | NP_032955    | 57       | 1             | not classified                                                                                                          | not classified                                                                                                                                                                                                                                                               | not classified                                                                                                                                                                                                                                            |
| proteasome (prosome, macropain) 26S subunit, ATPase 3      | Psmc3     | NP_032974    | 49       | 1             | cytoplasm, nucleus, proteasome complex                                                                                  | ATP binding, hydrolase activity, nucleoside-triphosphatase activity, nucleotide binding                                                                                                                                                                                      | blastocyst development, protein catabolic process                                                                                                                                                                                                         |
| prostaglandin-endoperoxide synthase 1                      | Ptgs1     | NP_032995    | 69       | 1             | cytoplasm, endoplasmic reticulum, membrane, microsome, nucleus                                                          | heme binding, iron ion binding, metal ion binding, oxidoreductase activity, oxidoreductase activity, acting on single donors with incorporation of molecular oxygen, incorporation of two atoms of oxygen, peroxidase activity, prostaglandin-endoperoxide synthase activity | fatty acid biosynthetic process, lipid biosynthetic process, oxidation reduction, prostaglandin biosynthetic process, prostaglandin metabolic process, regulation of blood pressure, regulation of cell proliferation, response to oxidative stress       |
| RAB4A, member RAS oncogene family                          | Rab4a     | NP_033029    | 24       | 1             | cytoplasm, endosome, membrane                                                                                           | GTP binding, nucleotide binding, protein binding, protein transporter activity                                                                                                                                                                                               | protein transport, regulation of endocytosis, small GTPase mediated signal transduction, transport                                                                                                                                                        |
| recombination activating gene 2                            | Rag2      | NP_033046    | 59       | 1             | nucleus                                                                                                                 | DNA binding, endonuclease activity, hydrolase activity, nuclease activity                                                                                                                                                                                                    | B cell differentiation, B cell homeostatic proliferation, B cell lineage commitment, DNA recombination, positive regulation of organ growth, T cell differentiation, T cell differentiation in the thymus, T cell lineage commitment, V(D)J recombination |
| RAS protein-specific guanine nucleotide-releasing factor 2 | Rasgrf2   | NP_033053    | 136      | 1             | cytoplasm, endoplasmic reticulum, intracellular, membrane, plasma membrane                                              | calcium ion binding, guanyl-nucleotide exchange factor activity, Rho guanyl-nucleotide exchange factor activity                                                                                                                                                              | intracellular signaling cascade, regulation of Rho protein signal transduction, regulation of small GTPase mediated signal transduction, small GTPase mediated signal transduction                                                                        |

| Protein Name                                               | Gene Name | Accession No | Mw (kDa) | Peptide Count | GO Component                                                                                                                            | GO Function                                                                                                                                                                                                                                                     | GO Process                                                                                                                                                                                             |
|------------------------------------------------------------|-----------|--------------|----------|---------------|-----------------------------------------------------------------------------------------------------------------------------------------|-----------------------------------------------------------------------------------------------------------------------------------------------------------------------------------------------------------------------------------------------------------------|--------------------------------------------------------------------------------------------------------------------------------------------------------------------------------------------------------|
| retinoblastoma binding protein 4                           | Rbbp4     | NP_033056    | 48       | 1             | nucleus, NuRD complex                                                                                                                   | protein binding                                                                                                                                                                                                                                                 | cell cycle, chromatin modification, chromatin remodeling, DNA replication, regulation of transcription, transcription                                                                                  |
| retinoblastoma binding protein 7                           | Rbbp7     | NP_033057    | 48       | 1             | nucleus, NuRD complex                                                                                                                   | protein binding, transcription repressor activity                                                                                                                                                                                                               | chromatin modification, chromatin remodeling, DNA replication, negative regulation of transcription from RNA polymerase II promoter, regulation of transcription, transcription                        |
| ribosomal protein L22                                      | Rpl22     | NP_033105    | 15       | 1             | cytoplasm, intracellular, ribonucleoprotein complex, ribosome                                                                           | heparin binding, RNA binding, structural constituent of ribosome                                                                                                                                                                                                | alpha-beta T cell differentiation, translation                                                                                                                                                         |
| ribosomal protein L30                                      | Rpl30     | NP_033109    | 13       | 1             | cellular_component, intracellular, ribonucleoprotein complex, ribosome                                                                  | molecular_function, structural constituent of ribosome                                                                                                                                                                                                          | biological_process, translation                                                                                                                                                                        |
| RNA polymerase 1-4                                         | Rpo1-4    | NP_033114    | 194      | 1             | DNA-directed RNA polymerase I complex, nucleus                                                                                          | DNA binding, DNA-directed RNA polymerase activity, magnesium ion binding, metal ion binding, nucleotidyltransferase activity, protein binding, transferase activity, zinc ion binding                                                                           | transcription                                                                                                                                                                                          |
| polymerase (RNA) II (DNA directed) polypeptide A           | Polr2a    | NP_033115    | 213      | 1             | DNA-directed RNA polymerase II, core complex, nucleolus, nucleus                                                                        | DNA binding, DNA-directed RNA polymerase activity, magnesium ion binding, metal ion binding, nucleotidyltransferase activity, protein binding, transferase activity, zinc ion binding                                                                           | transcription, transcription from RNA polymerase II promoter                                                                                                                                           |
| polymerase (RNA) II (DNA directed) polypeptide C           | Polr2c    | NP_033116    | 31       | 1             | cytoplasm, nucleus                                                                                                                      | DNA binding, DNA-directed RNA polymerase activity, protein binding, protein dimerization activity                                                                                                                                                               | transcription                                                                                                                                                                                          |
| Ras suppressor protein 1                                   | Rsu1      | NP_033131    | 31       | 1             | cellular_component                                                                                                                      | molecular_function, protein binding                                                                                                                                                                                                                             | Ras protein signal transduction                                                                                                                                                                        |
| retinoid X receptor gamma                                  | Rxrg      | NP_033133    | 51       | 1             | nucleus                                                                                                                                 | DNA binding, ligand-dependent nuclear receptor activity, metal ion binding, receptor activity, retinoid-X receptor activity, sequence-specific DNA binding, steroid binding, steroid hormone receptor activity, transcription factor activity, zinc ion binding | positive regulation of transcription from RNA polymerase II promoter, regulation of transcription, regulation of transcription, DNA-dependent, retinoic acid receptor signaling pathway, transcription |
| ryanodine receptor 1, skeletal muscle                      | Ryr1      | NP_033135    | 565      | 1             | integral to membrane, junctional membrane complex, membrane fraction, sarcoplasmic reticulum, sarcoplasmic reticulum membrane, T-tubule | ion channel activity, protein binding, receptor activity, voltage-gated calcium channel activity                                                                                                                                                                | calcium ion transport, ion transport, muscle contraction, regulation of muscle contraction, release of sequestered calcium ion into cytosol, transport                                                 |
| S100 calcium binding protein A13                           | S100a13   | NP_033139    | 11       | 1             | not classified                                                                                                                          | calcium ion binding                                                                                                                                                                                                                                             | not classified                                                                                                                                                                                         |
| sodium channel, voltage-gated, type VII, alpha polypeptide | Scn7a     | NP_033161    | 192      | 1             | integral to membrane                                                                                                                    | ion channel activity, sodium channel activity, voltage-gated ion channel activity                                                                                                                                                                               | ion transport, sodium ion transport, transport                                                                                                                                                         |

| Protein Name                                                                                                | Gene Name | Accession No | Mw (kDa) | Peptide Count | GO Component                                                                     | GO Function                                                                                                                                                                                                                                                                                                                                             | GO Process                                                                                                                                                                                                                                                                                                                                                                                   |
|-------------------------------------------------------------------------------------------------------------|-----------|--------------|----------|---------------|----------------------------------------------------------------------------------|---------------------------------------------------------------------------------------------------------------------------------------------------------------------------------------------------------------------------------------------------------------------------------------------------------------------------------------------------------|----------------------------------------------------------------------------------------------------------------------------------------------------------------------------------------------------------------------------------------------------------------------------------------------------------------------------------------------------------------------------------------------|
| sphingosine phosphate lyase 1                                                                               | Sgpl1     | NP_033189    | 64       | 1             | endoplasmic reticulum, integral to membrane, membrane                            | carboxy-lyase activity, catalytic activity, lyase activity, pyridoxal phosphate binding, sphinganine-1-phosphate aldolase activity                                                                                                                                                                                                                      | apoptosis, carboxylic acid metabolic process, face morphogenesis, fibroblast migration, hemopoiesis, kidney development, lipid metabolic process, nitrogen compound metabolic process, palate development, platelet-derived growth factor receptor signaling pathway, post-embryonic development, regulation of multicellular organism growth, skeletal system morphogenesis, vasculogenesis |
| solute carrier family 4 (anion exchanger), member 1, adaptor protein                                        | Slc4a1ap  | NP_033232    | 80       | 1             | not classified                                                                   | not classified                                                                                                                                                                                                                                                                                                                                          | not classified                                                                                                                                                                                                                                                                                                                                                                               |
| SWI/SNF related, matrix associated, actin dependent regulator of chromatin, subfamily a, member 3 isoform 1 | Hltf      | NP_033236    | 113      | 1             | nucleus                                                                          | ATP binding, ATPase activity, DNA binding, helicase activity, hydrolase activity, hydrolase activity, acting on acid anhydrides, in phosphorus-containing anhydrides, metal ion binding, nucleic acid binding, nucleotide binding, protein binding, RNA polymerase II transcription factor activity, transcription activator activity, zinc ion binding | chromatin modification, regulation of transcription from RNA polymerase II promoter, transcription                                                                                                                                                                                                                                                                                           |
| SWI/SNF related, matrix associated, actin dependent regulator of chromatin, subfamily c, member 1           | Smarcc1   | NP_033237    | 123      | 1             | chromatin, intracellular, nucleus, SWI/SNF complex, XY body                      | chromatin binding, DNA binding, protein binding                                                                                                                                                                                                                                                                                                         | chromatin assembly or disassembly, chromatin modification, DNA packaging, organ morphogenesis, regulation of transcription, transcription                                                                                                                                                                                                                                                    |
| U1 small nuclear ribonucleoprotein 70 kDa                                                                   | Snrp70    | NP_033250    | 52       | 1             | nucleus, ribonucleoprotein complex                                               | nucleic acid binding, nucleotide binding, RNA binding                                                                                                                                                                                                                                                                                                   | not classified                                                                                                                                                                                                                                                                                                                                                                               |
| small nuclear ribonucleoprotein D1                                                                          | Snrpd1    | NP_033252    | 13       | 1             | cytoplasm, nucleus, ribonucleoprotein complex, spliceosomal complex              | not classified                                                                                                                                                                                                                                                                                                                                          | mRNA processing, RNA splicing                                                                                                                                                                                                                                                                                                                                                                |
| small nuclear ribonucleoprotein E                                                                           | Snrpe     | NP_033253    | 11       | 1             | nucleus, ribonucleoprotein complex, spliceosomal complex                         | RNA binding                                                                                                                                                                                                                                                                                                                                             | mRNA processing, RNA splicing                                                                                                                                                                                                                                                                                                                                                                |
| serine (or cysteine) proteinase inhibitor, clade B, member 9                                                | Serpinb9  | NP_033282    | 42       | 1             | not classified                                                                   | protein binding                                                                                                                                                                                                                                                                                                                                         | anti-apoptosis                                                                                                                                                                                                                                                                                                                                                                               |
| signal recognition particle receptor, B subunit                                                             | Srprb     | NP_033301    | 30       | 1             | endoplasmic reticulum, integral to membrane, membrane, ribonucleoprotein complex | GTP binding, nucleotide binding, receptor activity                                                                                                                                                                                                                                                                                                      | not classified                                                                                                                                                                                                                                                                                                                                                                               |
| stanniocalcin 1                                                                                             | Stc1      | NP_033311    | 27       | 1             | extracellular region, extracellular space                                        | hormone activity                                                                                                                                                                                                                                                                                                                                        | cellular calcium ion homeostasis, cellular monovalent inorganic anion homeostasis                                                                                                                                                                                                                                                                                                            |
| synaptogyrin 2                                                                                              | Syng2     | NP_033330    | 25       | 1             | integral to membrane, membrane, synaptic vesicle                                 | not classified                                                                                                                                                                                                                                                                                                                                          | protein targeting                                                                                                                                                                                                                                                                                                                                                                            |



| Protein Name                                                   | Gene Name | Accession No | Mw (kDa) | Peptide Count | GO Component                                                                                                                                                                                                                     | GO Function                                                                                                                                                                                                                                                     | GO Process                                                                                                                                                                       |
|----------------------------------------------------------------|-----------|--------------|----------|---------------|----------------------------------------------------------------------------------------------------------------------------------------------------------------------------------------------------------------------------------|-----------------------------------------------------------------------------------------------------------------------------------------------------------------------------------------------------------------------------------------------------------------|----------------------------------------------------------------------------------------------------------------------------------------------------------------------------------|
| synaptotagmin 4                                                | Syt4      | NP_033334    | 48       | 1             | cell junction, cytoplasmic vesicle, integral to membrane, membrane, neuron projection, perinuclear region of cytoplasm, synapse, synaptic vesicle                                                                                | calcium ion binding, metal ion binding, transporter activity                                                                                                                                                                                                    | neurotransmitter secretion, regulation of calcium ion-dependent exocytosis, synaptic vesicle transport, transport                                                                |
| transcription elongation factor A protein 2                    | Tcea2     | NP_033352    | 34       | 1             | nucleus                                                                                                                                                                                                                          | DNA binding, metal ion binding, nucleic acid binding, protein binding, RNA polymerase II transcription factor activity, transcription elongation regulator activity, transcription regulator activity, translation elongation factor activity, zinc ion binding | regulation of transcription, regulation of transcription from RNA polymerase II promoter, regulation of transcription, DNA-dependent, RNA elongation, transcription              |
| tight junction protein 1                                       | Tjp1      | NP_033412    | 195      | 1             | adherens junction, apical junction complex, basolateral plasma membrane, cell junction, cell-cell adherens junction, cell-cell junction, cytoplasm, intercellular canalculus, membrane, nucleus, plasma membrane, tight junction | protein binding, protein domain specific binding                                                                                                                                                                                                                | blastocyst formation                                                                                                                                                             |
| topoisomerase (DNA) I                                          | Top1      | NP_033434    | 91       | 1             | chromosome, cytoplasm, nucleus, perikaryon                                                                                                                                                                                       | ATP binding, DNA binding, DNA topoisomerase (ATP-hydrolyzing) activity, DNA topoisomerase activity, DNA topoisomerase type I activity, isomerase activity, nucleotide binding                                                                                   | DNA replication, DNA topological change, embryonic cleavage                                                                                                                      |
| tumor necrosis factor (ligand) superfamily, member 10          | Tnfsf10   | NP_033451    | 33       | 1             | extracellular space, integral to membrane, membrane                                                                                                                                                                              | cytokine activity, protein binding, tumor necrosis factor receptor binding                                                                                                                                                                                      | apoptosis, immune response                                                                                                                                                       |
| villin 1                                                       | Vil1      | NP_033535    | 93       | 1             | brush border, cytoplasm, cytoskeleton                                                                                                                                                                                            | actin binding, calcium ion binding                                                                                                                                                                                                                              | actin filament capping, cytoskeleton organization                                                                                                                                |
| neurensin 1                                                    | Nrsn1     | NP_033539    | 22       | 1             | cell soma, cytoplasmic membrane-bounded vesicle, growth cone, integral to membrane, membrane                                                                                                                                     | not classified                                                                                                                                                                                                                                                  | nervous system development                                                                                                                                                       |
| alpha thalassemia/mental retardation syndrome X-linked homolog | Atrx      | NP_033556    | 279      | 1             | heterochromatin, nuclear chromosome, nucleus                                                                                                                                                                                     | ATP binding, chromatin binding, DNA binding, helicase activity, hydrolase activity, metal ion binding, nucleic acid binding, nucleotide binding, protein binding, sequence-specific DNA binding, transcription factor activity, zinc ion binding                | DNA repair, forebrain development, regulation of transcription, DNA-dependent, response to DNA damage stimulus                                                                   |
| zinc finger protein of the cerebellum 2                        | Zic2      | NP_033600    | 55       | 1             | intracellular, nucleus                                                                                                                                                                                                           | DNA binding, metal ion binding, nucleic acid binding, protein binding, zinc ion binding                                                                                                                                                                         | cell differentiation, central nervous system development, multicellular organismal development, nervous system development, neural tube closure, pigmentation during development |

| Protein Name                                               | Gene Name | Accession No | Mw (kDa) | Peptide Count | GO Component                                                                                                                                                                                              | GO Function                                                                                                                                                                                                                                                       | GO Process                                                                                                                                                               |
|------------------------------------------------------------|-----------|--------------|----------|---------------|-----------------------------------------------------------------------------------------------------------------------------------------------------------------------------------------------------------|-------------------------------------------------------------------------------------------------------------------------------------------------------------------------------------------------------------------------------------------------------------------|--------------------------------------------------------------------------------------------------------------------------------------------------------------------------|
| mitogen-activated protein kinase kinase kinase 12          | Map3k12   | NP_033608    | 96       | 1             | axon part, cytoplasm, cytosol, growth cone, membrane, plasma membrane                                                                                                                                     | ATP binding, kinase activity, magnesium ion binding, MAP kinase kinase activity, nucleotide binding, protein homodimerization activity, protein kinase activity, protein serine/threonine kinase activity, protein tyrosine kinase activity, transferase activity | histone phosphorylation, peptidyl-serine phosphorylation, peptidyl-threonine phosphorylation, protein amino acid autophosphorylation, protein amino acid phosphorylation |
| actin-like 7a                                              | Actl7a    | NP_033741    | 49       | 1             | cytoplasm, cytoskeleton, male germ cell nucleus, microtubule-based flagellum                                                                                                                              | protein binding                                                                                                                                                                                                                                                   | not classified                                                                                                                                                           |
| a disintegrin and metalloprotease domain 2 (fertilin beta) | Adam2     | NP_033748    | 82       | 1             | integral to membrane, membrane                                                                                                                                                                            | metalloendopeptidase activity, protein binding, zinc ion binding                                                                                                                                                                                                  | adult behavior, cell adhesion, proteolysis, visual learning                                                                                                              |
| adenylosuccinate lyase                                     | Adsl      | NP_033764    | 55       | 1             | not classified                                                                                                                                                                                            | (S)-2-(5-amino-1-(5-phospho-D-ribose)imidazole-4-carboxamido)succinate AMP-lyase (fumarate-forming) activity, catalytic activity, lyase activity, N6-(1,2-dicarboxyethyl)AMP AMP-lyase (fumarate-forming) activity                                                | purine nucleotide biosynthetic process, purine ribonucleotide biosynthetic process                                                                                       |
| activated leukocyte cell adhesion molecule                 | Alcam     | NP_033785    | 65       | 1             | axon, cell soma, external side of plasma membrane, integral to membrane, membrane                                                                                                                         | protein binding                                                                                                                                                                                                                                                   | axon guidance, cell adhesion, motor axon guidance                                                                                                                        |
| ankyrin repeat and FYVE domain containing 1                | Ankfy1    | NP_033801    | 129      | 1             | cytoplasm, endosome, endosome membrane, membrane                                                                                                                                                          | metal ion binding, protein binding, zinc ion binding                                                                                                                                                                                                              | endocytosis                                                                                                                                                              |
| adaptor protein complex AP-2, mu1                          | Ap2m1     | NP_033809    | 50       | 1             | clathrin adaptor complex, clathrin coat of coated pit, coated pit, membrane, mitochondrion, plasma membrane, secretory granule                                                                            | lipid binding, protein binding                                                                                                                                                                                                                                    | intracellular protein transport, vesicle-mediated transport                                                                                                              |
| apurinic/aprimidinic endonuclease 1                        | Apex1     | NP_033817    | 35       | 1             | cytoplasm, intracellular, nucleus                                                                                                                                                                         | DNA binding, DNA-(apurinic or apyrimidinic site) lyase activity, endonuclease activity, lyase activity, magnesium ion binding, metal ion binding, nuclease activity                                                                                               | cell redox homeostasis, DNA repair, response to DNA damage stimulus                                                                                                      |
| adenine phosphoribosyl transferase                         | Aprt      | NP_033828    | 20       | 1             | cytoplasm                                                                                                                                                                                                 | adenine binding, adenine phosphoribosyltransferase activity, AMP binding, transferase activity, transferase activity, transferring glycosyl groups                                                                                                                | adenine metabolic process, adenine salvage, grooming behavior, nucleoside metabolic process, purine ribonucleoside salvage                                               |
| aquaporin 2                                                | Aqp2      | NP_033829    | 29       | 1             | apical plasma membrane, cytoplasmic vesicle, integral to endosome membrane, integral to membrane, integral to plasma membrane, membrane, plasma membrane, recycling endosome, recycling endosome membrane | transporter activity, water channel activity                                                                                                                                                                                                                      | cellular response to water deprivation, renal water transport, transport, water transport                                                                                |

| Protein Name                                     | Gene Name | Accession No | Mw (kDa) | Peptide Count | GO Component                                                                                     | GO Function                                                                                                                                                                                                                                                        | GO Process                                                                                                                                                                                                              |
|--------------------------------------------------|-----------|--------------|----------|---------------|--------------------------------------------------------------------------------------------------|--------------------------------------------------------------------------------------------------------------------------------------------------------------------------------------------------------------------------------------------------------------------|-------------------------------------------------------------------------------------------------------------------------------------------------------------------------------------------------------------------------|
| v-raf murine sarcoma 3611 viral oncogene homolog | Araf      | NP_033833    | 68       | 1             | mitochondrion                                                                                    | ATP binding, diacylglycerol binding, kinase activity, metal ion binding, nucleotide binding, protein binding, protein kinase activity, protein serine/threonine kinase activity, receptor signaling protein activity, transferase activity, zinc ion binding       | intracellular signaling cascade, protein amino acid phosphorylation, signal transduction                                                                                                                                |
| antioxidant protein 1                            | Atox1     | NP_033850    | 7        | 1             | not classified                                                                                   | copper ion binding, metal ion binding                                                                                                                                                                                                                              | cellular copper ion homeostasis, copper ion transport, ion transport, metal ion transport, transport                                                                                                                    |
| axin 1                                           | Axin1     | NP_033863    | 96       | 1             | cytoplasm, cytoplasmic membrane-bounded vesicle, intracellular, lateral plasma membrane, nucleus | protein binding, protein homodimerization activity, signal transducer activity                                                                                                                                                                                     | multicellular organismal development, negative regulation of Wnt receptor signaling pathway, positive regulation of JNK cascade, protein catabolic process, sensory perception of sound, Wnt receptor signaling pathway |
| galactosidase, beta 1                            | Glb1      | NP_033882    | 73       | 1             | lysosome                                                                                         | beta-galactosidase activity, catalytic activity, cation binding, hydrolase activity, hydrolase activity, acting on glycosyl bonds, hydrolase activity, hydrolyzing O-glycosyl compounds                                                                            | carbohydrate metabolic process, metabolic process                                                                                                                                                                       |
| bone morphogenetic protein 1                     | Bmp1      | NP_033885    | 112      | 1             | extracellular space                                                                              | calcium ion binding, cytokine activity, growth factor activity, hydrolase activity, metal ion binding, metalloendopeptidase activity, metallopeptidase activity, peptidase activity, zinc ion binding                                                              | cartilage development, cell differentiation, multicellular organismal development, ossification, proteolysis                                                                                                            |
| BMX non-receptor tyrosine kinase                 | Bmx       | NP_033889    | 75       | 1             | cytoplasm                                                                                        | ATP binding, kinase activity, metal ion binding, non-membrane spanning protein tyrosine kinase activity, nucleotide binding, protein binding, protein kinase activity, protein tyrosine kinase activity, receptor activity, transferase activity, zinc ion binding | intracellular signaling cascade, protein amino acid phosphorylation                                                                                                                                                     |

| Protein Name                                  | Gene Name | Accession No | Mw (kDa) | Peptide Count | GO Component                                                                                           | GO Function                                                                                                                                                                                          | GO Process                                                                                                                                                                                                                                                                                                                                                                                            |
|-----------------------------------------------|-----------|--------------|----------|---------------|--------------------------------------------------------------------------------------------------------|------------------------------------------------------------------------------------------------------------------------------------------------------------------------------------------------------|-------------------------------------------------------------------------------------------------------------------------------------------------------------------------------------------------------------------------------------------------------------------------------------------------------------------------------------------------------------------------------------------------------|
| breast cancer 1                               | Brca1     | NP_033894    | 199      | 1             | centrosome, condensed chromosome, cytoplasm, intracellular, nucleus, ribonucleoprotein complex         | damaged DNA binding, DNA binding, ligase activity, metal ion binding, protein binding, RNA binding, zinc ion binding                                                                                 | cell cycle, centrosome cycle, centrosome duplication, chordate embryonic development, DNA damage response, signal transduction resulting in induction of apoptosis, DNA repair, DNA replication, dosage compensation, by inactivation of X chromosome, fatty acid biosynthetic process, lipid biosynthetic process, modification-dependent protein catabolic process, response to DNA damage stimulus |
| peripheral benzodiazepine receptor            | Tspo      | NP_033905    | 19       | 1             | integral to membrane, membrane, mitochondrion                                                          | receptor activity                                                                                                                                                                                    | not classified                                                                                                                                                                                                                                                                                                                                                                                        |
| protein disulfide isomerase associated 4      | Pdia4     | NP_033917    | 72       | 1             | endoplasmic reticulum, endoplasmic reticulum lumen                                                     | isomerase activity, protein binding, protein disulfide isomerase activity                                                                                                                            | cell redox homeostasis                                                                                                                                                                                                                                                                                                                                                                                |
| F-actin capping protein alpha-1 subunit       | Capza1    | NP_033927    | 33       | 1             | cortical cytoskeleton, F-actin capping protein complex, membrane                                       | actin binding                                                                                                                                                                                        | actin cytoskeleton organization, actin filament capping                                                                                                                                                                                                                                                                                                                                               |
| calpastatin                                   | Cast      | NP_033947    | 81       | 1             | cellular_component                                                                                     | calcium-dependent cysteine-type endopeptidase inhibitor activity, cysteine-type endopeptidase inhibitor activity, peptidase inhibitor activity                                                       | protein catabolic process                                                                                                                                                                                                                                                                                                                                                                             |
| chaperonin containing Tcp1, subunit 6b (zeta) | Cct6b     | NP_033969    | 58       | 1             | cytoplasm                                                                                              | ATP binding, nucleotide binding, protein binding, unfolded protein binding                                                                                                                           | cellular protein metabolic process, protein folding                                                                                                                                                                                                                                                                                                                                                   |
| cyclin-dependent kinase 4                     | Cdk4      | NP_034000    | 34       | 1             | cyclin-dependent protein kinase holoenzyme complex, nucleoplasm, nucleus, transcription factor complex | ATP binding, cyclin-dependent protein kinase activity, kinase activity, nucleotide binding, protein binding, protein kinase activity, protein serine/threonine kinase activity, transferase activity | cell cycle, cell division, protein amino acid phosphorylation, regulation of cell cycle, regulation of cell proliferation, signal transduction                                                                                                                                                                                                                                                        |
| tripeptidyl-peptidase I                       | Tpp1      | NP_034036    | 61       | 1             | mitochondrion                                                                                          | hydrolase activity, serine-type endopeptidase activity, serine-type peptidase activity                                                                                                               | lysosome organization, neuromuscular process controlling balance                                                                                                                                                                                                                                                                                                                                      |
| copine VI                                     | Cpne6     | NP_034077    | 62       | 1             | axon, dendrite, membrane fraction                                                                      | phosphatidylserine binding                                                                                                                                                                           | biological_process                                                                                                                                                                                                                                                                                                                                                                                    |
| cathepsin W preproprotein                     | Ctsw      | NP_034115    | 42       | 1             | not classified                                                                                         | cysteine-type endopeptidase activity, cysteine-type peptidase activity, hydrolase activity, peptidase activity                                                                                       | proteolysis                                                                                                                                                                                                                                                                                                                                                                                           |
| D-amino acid oxidase 1                        | Dao1      | NP_034148    | 39       | 1             | peroxisome                                                                                             | D-amino-acid oxidase activity, oxidoreductase activity                                                                                                                                               | leucine metabolic process, oxidation reduction                                                                                                                                                                                                                                                                                                                                                        |
| DEAD (Asp-Glu-Ala-Asp) box polypeptide 4      | Ddx4      | NP_034159    | 76       | 1             | cell part, cytoplasm, nucleus, ribonucleoprotein complex                                               | ATP binding, ATP-dependent helicase activity, helicase activity, hydrolase activity, nucleic acid binding, nucleotide binding, protein binding                                                       | multicellular organismal development, regulation of protein localization                                                                                                                                                                                                                                                                                                                              |
| dynamamin                                     | Dnm1      | NP_034195    | 97       | 1             | cytoplasm, cytoskeleton, membrane coat, microtubule                                                    | GTP binding, GTPase activity, hydrolase activity, identical protein binding, motor activity, nucleotide binding, protein binding                                                                     | endocytosis                                                                                                                                                                                                                                                                                                                                                                                           |

| Protein Name                                              | Gene Name | Accession No | Mw (kDa) | Peptide Count | GO Component                                                                                     | GO Function                                                                                                                                                                                        | GO Process                                                                                                                                                                                                                                                                                                                                                                                                                                                                                                                                                                                                                                                                                                                                                                                                                |
|-----------------------------------------------------------|-----------|--------------|----------|---------------|--------------------------------------------------------------------------------------------------|----------------------------------------------------------------------------------------------------------------------------------------------------------------------------------------------------|---------------------------------------------------------------------------------------------------------------------------------------------------------------------------------------------------------------------------------------------------------------------------------------------------------------------------------------------------------------------------------------------------------------------------------------------------------------------------------------------------------------------------------------------------------------------------------------------------------------------------------------------------------------------------------------------------------------------------------------------------------------------------------------------------------------------------|
| dystrophin related protein 2                              | Drp2      | NP_034208    | 108      | 1             | cytoplasm, cytoskeleton, plasma membrane                                                         | calcium ion binding, metal ion binding, protein binding, zinc ion binding                                                                                                                          | not classified                                                                                                                                                                                                                                                                                                                                                                                                                                                                                                                                                                                                                                                                                                                                                                                                            |
| EH-domain containing 1                                    | Ehd1      | NP_034249    | 61       | 1             | early endosome, endocytic vesicle, endosome, membrane, plasma membrane                           | ATP binding, calcium ion binding, GTP binding, GTPase activity, nucleotide binding, protein binding                                                                                                | endocytosis, endosome transport                                                                                                                                                                                                                                                                                                                                                                                                                                                                                                                                                                                                                                                                                                                                                                                           |
| eukaryotic translation initiation factor 1A               | Eif1a     | NP_034250    | 17       | 1             | not classified                                                                                   | RNA binding, translation initiation factor activity                                                                                                                                                | translation, translational initiation                                                                                                                                                                                                                                                                                                                                                                                                                                                                                                                                                                                                                                                                                                                                                                                     |
| eukaryotic translation initiation factor 2 alpha kinase 3 | Eif2ak3   | NP_034251    | 125      | 1             | cytoplasm, endoplasmic reticulum, endoplasmic reticulum membrane, integral to membrane, membrane | ATP binding, kinase activity, nucleotide binding, protein binding, protein kinase activity, protein serine/threonine kinase activity, transferase activity, translation initiation factor activity | activation of caspase activity, apoptosis, bone mineralization, calcium-mediated signaling, chondrocyte development, endoplasmic reticulum organization, endoplasmic reticulum unfolded protein response, fat cell differentiation, insulin secretion, insulin-like growth factor receptor signaling pathway, lactation, negative regulation of myelination, negative regulation of translation, pancreas development, positive regulation of protein binding, positive regulation of signal transduction, protein amino acid autophosphorylation, protein amino acid phosphorylation, regulation of fatty acid metabolic process, regulation of translation, response to stress, response to unfolded protein, skeletal system development, SREBP-mediated signaling pathway, translation, virus-infected cell apoptosis |
| Ets2 repressor factor                                     | Erf       | NP_034285    | 59       | 1             | nucleus                                                                                          | DNA binding, sequence-specific DNA binding, transcription factor activity                                                                                                                          | regulation of transcription, regulation of transcription, DNA-dependent, transcription                                                                                                                                                                                                                                                                                                                                                                                                                                                                                                                                                                                                                                                                                                                                    |
| fumarylacetoacetate hydrolase                             | Fah       | NP_034306    | 46       | 1             | not classified                                                                                   | calcium ion binding, catalytic activity, fumarylacetoacetase activity, hydrolase activity, magnesium ion binding, metal ion binding                                                                | arginine catabolic process, aromatic amino acid family metabolic process, L-phenylalanine catabolic process, metabolic process, tyrosine catabolic process                                                                                                                                                                                                                                                                                                                                                                                                                                                                                                                                                                                                                                                                |
| fibrillin 2                                               | Fbn2      | NP_034311    | 314      | 1             | extracellular region, microfibril, proteinaceous extracellular matrix                            | binding, calcium ion binding, extracellular matrix structural constituent                                                                                                                          | embryonic limb morphogenesis, limb morphogenesis                                                                                                                                                                                                                                                                                                                                                                                                                                                                                                                                                                                                                                                                                                                                                                          |
| fibroblast growth factor 5                                | Fgf5      | NP_034333    | 29       | 1             | extracellular region                                                                             | growth factor activity                                                                                                                                                                             | glial cell differentiation, positive regulation of cell division                                                                                                                                                                                                                                                                                                                                                                                                                                                                                                                                                                                                                                                                                                                                                          |

| Protein Name                                                       | Gene Name | Accession No | Mw (kDa) | Peptide Count | GO Component                                                           | GO Function                                                                                                                                                                                                                                                              | GO Process                                                                                                                                                                                                                                                                                                                                                                                                                                                                                                                                                                                                                                                         |
|--------------------------------------------------------------------|-----------|--------------|----------|---------------|------------------------------------------------------------------------|--------------------------------------------------------------------------------------------------------------------------------------------------------------------------------------------------------------------------------------------------------------------------|--------------------------------------------------------------------------------------------------------------------------------------------------------------------------------------------------------------------------------------------------------------------------------------------------------------------------------------------------------------------------------------------------------------------------------------------------------------------------------------------------------------------------------------------------------------------------------------------------------------------------------------------------------------------|
| FK506 binding protein 4                                            | Fkbp4     | NP_034349    | 52       | 1             | cytoplasm, nucleus                                                     | ATP binding, binding, glucocorticoid receptor binding, GTP binding, heat shock protein binding, isomerase activity, peptidyl-prolyl cis trans isomerase activity, phosphoprotein binding                                                                                 | androgen receptor signaling pathway, embryo implantation, male sex differentiation, prostate gland development, protein complex localization, protein folding, reproductive structure development, steroid hormone receptor complex assembly                                                                                                                                                                                                                                                                                                                                                                                                                       |
| folypolyglutamyl synthetase                                        | Fpgs      | NP_034366    | 65       | 1             | cytoplasm, mitochondrion                                               | ATP binding, ligase activity, nucleotide binding, tetrahydrofolypolyglutamate synthase activity                                                                                                                                                                          | biosynthetic process, folic acid and derivative biosynthetic process, one carbon metabolic process                                                                                                                                                                                                                                                                                                                                                                                                                                                                                                                                                                 |
| mitochondrial ribosomal protein S33 isoform 1                      | Mrps33    | NP_034400    | 12       | 1             | cellular_component, mitochondrion, ribonucleoprotein complex, ribosome | molecular_function                                                                                                                                                                                                                                                       | biological_process                                                                                                                                                                                                                                                                                                                                                                                                                                                                                                                                                                                                                                                 |
| guanine nucleotide binding protein (G protein), alpha inhibiting 3 | Gnai3     | NP_034436    | 41       | 1             | cytoplasm, Golgi apparatus, heterotrimeric G-protein complex           | GTP binding, GTPase activity, guanyl nucleotide binding, nucleotide binding, protein binding, signal transducer activity                                                                                                                                                 | G-protein coupled receptor protein signaling pathway, regulation of heart contraction, signal transduction                                                                                                                                                                                                                                                                                                                                                                                                                                                                                                                                                         |
| G-protein-coupled receptor 50                                      | Gpr50     | NP_034470    | 65       | 1             | integral to membrane, membrane, plasma membrane                        | G-protein coupled receptor activity, melatonin receptor activity, receptor activity, signal transducer activity                                                                                                                                                          | G-protein coupled receptor protein signaling pathway, signal transduction                                                                                                                                                                                                                                                                                                                                                                                                                                                                                                                                                                                          |
| granzyme A                                                         | Gzma      | NP_034500    | 29       | 1             | extracellular region                                                   | hydrolase activity, peptidase activity, serine-type endopeptidase activity, serine-type peptidase activity                                                                                                                                                               | apoptosis, cytolysis, proteolysis                                                                                                                                                                                                                                                                                                                                                                                                                                                                                                                                                                                                                                  |
| hexosaminidase B                                                   | Hexb      | NP_034552    | 61       | 1             | acrosomal vesicle, lysosome, membrane                                  | beta-N-acetylhexosaminidase activity, catalytic activity, cation binding, hydrolase activity, hydrolase activity, acting on glycosyl bonds, hydrolase activity, hydrolyzing O-glycosyl compounds, protein heterodimerization activity, protein homodimerization activity | carbohydrate metabolic process, cellular calcium ion homeostasis, cellular protein metabolic process, ganglioside catabolic process, glycosaminoglycan metabolic process, glycosphingolipid metabolic process, lipid storage, locomotory behavior, lysosome organization, male courtship behavior, metabolic process, myelination, neuromuscular process, neuromuscular process controlling balance, oligosaccharide catabolic process, oogenesis, penetration of zona pellucida, phospholipid biosynthetic process, regulation of cellular metabolic process, sensory perception of sound, sexual reproduction, single fertilization, skeletal system development |
| histidine rich calcium binding protein                             | Hrc       | NP_034603    | 85       | 1             | sarcoplasmic reticulum membrane                                        | not classified                                                                                                                                                                                                                                                           | calcium ion homeostasis, regulation of heart contraction                                                                                                                                                                                                                                                                                                                                                                                                                                                                                                                                                                                                           |

| Protein Name                                                               | Gene Name | Accession No | Mw (kDa) | Peptide Count | GO Component                                                                                                                                                      | GO Function                                                                                                                                                                                  | GO Process                                                                                                                                                                                                                                                                     |
|----------------------------------------------------------------------------|-----------|--------------|----------|---------------|-------------------------------------------------------------------------------------------------------------------------------------------------------------------|----------------------------------------------------------------------------------------------------------------------------------------------------------------------------------------------|--------------------------------------------------------------------------------------------------------------------------------------------------------------------------------------------------------------------------------------------------------------------------------|
| ELAV (embryonic lethal, abnormal vision, Drosophila)-like 1 (Hu antigen R) | Elavl1    | NP_034615    | 36       | 1             | nucleus                                                                                                                                                           | nucleic acid binding, nucleotide binding, RNA binding                                                                                                                                        | mRNA stabilization                                                                                                                                                                                                                                                             |
| intercellular adhesion molecule                                            | Icam1     | NP_034623    | 59       | 1             | external side of plasma membrane, immunological synapse, integral to membrane, membrane                                                                           | protein binding                                                                                                                                                                              | cell adhesion, cell adhesion mediated by integrin, cell-cell adhesion, leukocyte adhesion, regulation of cell adhesion, T cell antigen processing and presentation                                                                                                             |
| insulin-like growth factor 2 receptor                                      | Igf2r     | NP_034645    | 274      | 1             | cytoplasm, endosome, integral to membrane, lysosome, membrane, membrane fraction, nuclear envelope lumen, nucleus, trans-Golgi network transport vesicle          | glycoprotein binding, insulin-like growth factor binding, mannose binding, receptor activity, transporter activity                                                                           | transport                                                                                                                                                                                                                                                                      |
| interleukin 16                                                             | Il16      | NP_034681    | 141      | 1             | cytoplasm, extracellular region, extracellular space, intracellular, nucleus                                                                                      | cytokine activity, protein binding                                                                                                                                                           | chemotaxis, induction of positive chemotaxis, leukocyte chemotaxis, regulation of transcription, transcription                                                                                                                                                                 |
| integrin linked kinase                                                     | Ilk       | NP_034692    | 51       | 1             | cell junction, focal adhesion, membrane, plasma membrane                                                                                                          | ATP binding, kinase activity, nucleotide binding, protein binding, protein kinase activity, protein serine/threonine kinase activity, protein tyrosine kinase activity, transferase activity | branching involved in ureteric bud morphogenesis, establishment or maintenance of epithelial cell apical/basal polarity, integrin-mediated signaling pathway, positive regulation of cell proliferation, protein amino acid phosphorylation, regulation of signal transduction |
| integrin alpha 5                                                           | Itga5     | NP_034707    | 115      | 1             | external side of plasma membrane, integral to membrane, integrin complex, membrane, synaptosome                                                                   | calcium ion binding, integrin binding, protein binding, receptor activity                                                                                                                    | cell adhesion, cell-cell adhesion mediated by integrin, cell-substrate junction assembly, heterophilic cell adhesion, integrin-mediated signaling pathway, leukocyte adhesion, memory                                                                                          |
| KH-type splicing regulatory protein (FUSE binding protein 2)               | Khsrp     | NP_034743    | 77       | 1             | cytoplasm, nucleus                                                                                                                                                | aminoacyl-tRNA ligase activity, ATP binding, DNA binding, nucleotide binding, RNA binding                                                                                                    | mRNA processing, mRNA transport, regulation of transcription, RNA splicing, transcription, translation, transport, tRNA aminoacylation for protein translation                                                                                                                 |
| lysosomal membrane glycoprotein 1                                          | Lamp1     | NP_034814    | 44       | 1             | endosome, external side of plasma membrane, integral to membrane, late endosome, lysosome, melanosome, membrane, multivesicular body, plasma membrane, sarcolemma | protein binding                                                                                                                                                                              | not classified                                                                                                                                                                                                                                                                 |
| like-glycosyltransferase                                                   | Large     | NP_034817    | 88       | 1             | Golgi apparatus, integral to membrane, membrane                                                                                                                   | transferase activity, transferase activity, transferring glycosyl groups                                                                                                                     | glycoprotein biosynthetic process, muscle maintenance                                                                                                                                                                                                                          |
| lamin B1                                                                   | Lmnb1     | NP_034851    | 67       | 1             | intermediate filament, lamin filament, membrane, nucleus                                                                                                          | structural molecule activity                                                                                                                                                                 | not classified                                                                                                                                                                                                                                                                 |

| Protein Name                                        | Gene Name | Accession No | Mw (kDa) | Peptide Count | GO Component                                                                   | GO Function                                                                                                                                                        | GO Process                                                                                                                                                                                                                                                                                                                                                                                                                                                                                                                                                 |
|-----------------------------------------------------|-----------|--------------|----------|---------------|--------------------------------------------------------------------------------|--------------------------------------------------------------------------------------------------------------------------------------------------------------------|------------------------------------------------------------------------------------------------------------------------------------------------------------------------------------------------------------------------------------------------------------------------------------------------------------------------------------------------------------------------------------------------------------------------------------------------------------------------------------------------------------------------------------------------------------|
| lysyl oxidase-like 1                                | Loxl1     | NP_034859    | 66       | 1             | extracellular matrix, extracellular region, proteinaceous extracellular matrix | copper ion binding, metal ion binding, oxidoreductase activity, oxidoreductase activity, acting on the CH-NH2 group of donors, oxygen as acceptor, protein binding | oxidation reduction                                                                                                                                                                                                                                                                                                                                                                                                                                                                                                                                        |
| lysosomal trafficking regulator                     | Lyst      | NP_034878    | 425      | 1             | cytoplasm, cytosol                                                             | not classified                                                                                                                                                     | blood coagulation, defense response to bacterium, defense response to protozoan, defense response to virus, leukocyte chemotaxis, lysosome organization, mast cell secretory granule organization, melanosome organization, microtubule-based process, neutrophil mediated immunity, phospholipid homeostasis, phospholipid metabolic process, pigment granule organization, pigmentation, positive regulation of natural killer cell activation, protein transport, response to drug, secretion of lysosomal enzymes, T cell mediated immunity, transport |
| mutS homolog 3                                      | Msh3      | NP_034959    | 123      | 1             | not classified                                                                 | ATP binding, centromeric DNA binding, damaged DNA binding, DNA binding, mismatched DNA binding, nucleotide binding                                                 | DNA repair, mismatch repair, response to DNA damage stimulus, somatic hypermutation of immunoglobulin genes, somatic recombination of immunoglobulin gene segments                                                                                                                                                                                                                                                                                                                                                                                         |
| myelin basic protein expression factor 2, repressor | Myef2     | NP_034982    | 57       | 1             | nucleus                                                                        | DNA binding, nucleic acid binding, nucleotide binding, RNA binding                                                                                                 | transcription                                                                                                                                                                                                                                                                                                                                                                                                                                                                                                                                              |
| myosin IB                                           | Myo1b     | NP_034993    | 129      | 1             | myosin complex                                                                 | actin binding, ATP binding, calmodulin binding, motor activity, nucleotide binding                                                                                 | not classified                                                                                                                                                                                                                                                                                                                                                                                                                                                                                                                                             |
| neuronal apoptosis inhibitory protein 5             | Naip5     | NP_035000    | 160      | 1             | intracellular                                                                  | metal ion binding, zinc ion binding                                                                                                                                | apoptosis                                                                                                                                                                                                                                                                                                                                                                                                                                                                                                                                                  |
| neutrophil cytosolic factor 2                       | Ncf2      | NP_035007    | 59       | 1             | acrosomal vesicle, cytoplasm, cytosol                                          | binding, protein binding, Rac GTPase binding, superoxide-generating NADPH oxidase activity                                                                         | NADP catabolic process, superoxide anion generation, superoxide metabolic process                                                                                                                                                                                                                                                                                                                                                                                                                                                                          |
| neurofilament, heavy polypeptide                    | Nefh      | NP_035034    | 117      | 1             | intermediate filament, mitochondrion, neurofilament                            | not classified                                                                                                                                                     | intermediate filament bundle assembly, intermediate filament cytoskeleton organization, microtubule cytoskeleton organization, neurofilament cytoskeleton organization                                                                                                                                                                                                                                                                                                                                                                                     |
| nitrogen fixation gene, yeast homolog 1             | Nfs1      | NP_035041    | 51       | 1             | cytoplasm, mitochondrial matrix, mitochondrion, nucleus                        | catalytic activity, cysteine desulfurase activity, pyridoxal phosphate binding, transferase activity                                                               | cysteine metabolic process, iron incorporation into metallo-sulfur cluster, metabolic process, Molybdopterin cofactor biosynthetic process                                                                                                                                                                                                                                                                                                                                                                                                                 |



| Protein Name                                          | Gene Name | Accession No | Mw (kDa) | Peptide Count | GO Component                                                                     | GO Function                                                                                                                                                                                                                                                                      | GO Process                                                                                                                                                                                                                                                                             |
|-------------------------------------------------------|-----------|--------------|----------|---------------|----------------------------------------------------------------------------------|----------------------------------------------------------------------------------------------------------------------------------------------------------------------------------------------------------------------------------------------------------------------------------|----------------------------------------------------------------------------------------------------------------------------------------------------------------------------------------------------------------------------------------------------------------------------------------|
| natural killer tumor recognition                      | Nktr      | NP_035048    | 163      | 1             | not classified                                                                   | isomerase activity, peptide binding, peptidyl-prolyl cis-trans isomerase activity                                                                                                                                                                                                | protein folding                                                                                                                                                                                                                                                                        |
| orthodenticle 1                                       | Otx1      | NP_035153    | 38       | 1             | nucleus                                                                          | DNA binding, protein binding, sequence-specific DNA binding, transcription factor activity, transcription regulator activity                                                                                                                                                     | anterior/posterior pattern formation, forebrain development, inner ear morphogenesis, midbrain development, multicellular organismal development, regulation of transcription, regulation of transcription from RNA polymerase II promoter, regulation of transcription, DNA-dependent |
| programmed cell death 6                               | Pdcd6     | NP_035181    | 22       | 1             | cytoplasm, endoplasmic reticulum, membrane, microsome, nucleus, soluble fraction | calcium ion binding, calcium-dependent protein binding, protein binding                                                                                                                                                                                                          | activation of caspase activity, apoptosis, response to calcium ion                                                                                                                                                                                                                     |
| phosphodiesterase 4D, cAMP specific                   | Pde4d     | NP_035186    | 85       | 1             | cytoplasm, cytoskeleton, membrane                                                | 3',5'-cyclic-nucleotide phosphodiesterase activity, catalytic activity, hydrolase activity, metal ion binding                                                                                                                                                                    | cAMP catabolic process, signal transduction, smooth muscle contraction                                                                                                                                                                                                                 |
| ErbB3-binding protein 1                               | Pa2g4     | NP_035249    | 44       | 1             | cytoplasm, nucleus, ribonucleoprotein complex                                    | DNA binding, protein binding, RNA binding, transcription factor activity                                                                                                                                                                                                         | cellular process, negative regulation of transcription, DNA-dependent, regulation of transcription, regulation of translation, rRNA processing, transcription                                                                                                                          |
| polymerase (DNA directed), delta 1, catalytic subunit | Pold1     | NP_035261    | 124      | 1             | nucleus                                                                          | 3'-5' exonuclease activity, DNA binding, DNA-directed DNA polymerase activity, exonuclease activity, hydrolase activity, metal ion binding, nuclease activity, nucleic acid binding, nucleotide binding, nucleotidyltransferase activity, transferase activity, zinc ion binding | base-excision repair, gap-filling, DNA replication, DNA replication proofreading, nucleobase, nucleoside, nucleotide and nucleic acid metabolic process                                                                                                                                |
| proteasome activator subunit 3                        | Psme3     | NP_035322    | 30       | 1             | cytoplasm, nucleus, proteasome activator complex, proteasome complex             | peptidase activity, proteasome activator activity                                                                                                                                                                                                                                | apoptosis, cell cycle                                                                                                                                                                                                                                                                  |
| RAD1 homolog                                          | Rad1      | NP_035362    | 32       | 1             | nucleus                                                                          | damaged DNA binding, exodeoxyribonuclease III activity, exonuclease activity, hydrolase activity, nuclease activity                                                                                                                                                              | DNA repair, response to DNA damage stimulus                                                                                                                                                                                                                                            |
| RAD52 homolog                                         | Rad52     | NP_035366    | 47       | 1             | nucleus                                                                          | protein binding                                                                                                                                                                                                                                                                  | DNA recombination, DNA repair, double-strand break repair via homologous recombination, response to DNA damage stimulus                                                                                                                                                                |
| RAN binding protein 2                                 | Ranbp2    | NP_035370    | 341      | 1             | intracellular, nuclear pore, nucleus                                             | binding, isomerase activity, metal ion binding, peptidyl-prolyl cis-trans isomerase activity, protein binding, zinc ion binding                                                                                                                                                  | intracellular transport, modification-dependent protein catabolic process, mRNA transport, protein folding, protein transport, transmembrane transport, transport                                                                                                                      |

| Protein Name                                                                | Gene Name | Accession No | Mw (kDa) | Peptide Count | GO Component                                                                                     | GO Function                                                                                                            | GO Process                                                                                                                                                                                                                                                                                                                                                                                                                                          |
|-----------------------------------------------------------------------------|-----------|--------------|----------|---------------|--------------------------------------------------------------------------------------------------|------------------------------------------------------------------------------------------------------------------------|-----------------------------------------------------------------------------------------------------------------------------------------------------------------------------------------------------------------------------------------------------------------------------------------------------------------------------------------------------------------------------------------------------------------------------------------------------|
| SH3 domain protein 1B                                                       | Itsn2     | NP_035495    | 189      | 1             | cytoplasm, intracellular                                                                         | calcium ion binding, protein binding, Rho guanyl-nucleotide exchange factor activity                                   | endocytosis, regulation of Rho protein signal transduction                                                                                                                                                                                                                                                                                                                                                                                          |
| solute carrier family 16, member 7                                          | Slc16a7   | NP_035521    | 53       | 1             | integral to membrane, membrane, plasma membrane                                                  | secondary active monocarboxylate transmembrane transporter activity, symporter activity                                | organic anion transport, transport                                                                                                                                                                                                                                                                                                                                                                                                                  |
| solute carrier family 34 (sodium phosphate), member 1                       | Slc34a1   | NP_035522    | 69       | 1             | integral to membrane, membrane, plasma membrane                                                  | protein binding, sodium ion binding, sodium-dependent phosphate transmembrane transporter activity, symporter activity | bone remodeling, ion transport, phosphate transport, sodium ion transport, transport                                                                                                                                                                                                                                                                                                                                                                |
| SWI/SNF-related matrix-associated actin-dependent regulator of chromatin a4 | Smarca4   | NP_035547    | 182      | 1             | heterochromatin, nuclear euchromatin, nucleolus, nucleus, perichromatin fibrils, SWI/SNF complex | ATPase activity, chromatin binding, protein binding, transcription factor binding                                      | blastocyst growth, blastocyst hatching, embryonic hindlimb morphogenesis, epidermis morphogenesis, extracellular matrix organization, forebrain development, glial cell fate determination, heart development, heart trabecula formation, hindbrain development, keratinocyte differentiation, methylation-dependent chromatin silencing, negative regulation of transcription from RNA polymerase II promoter, nucleosome assembly, vasculogenesis |
| soritin-related receptor, LDLR class A repeats-containing                   | Sor1      | NP_035566    | 247      | 1             | integral to membrane, low-density lipoprotein particle, membrane                                 | receptor activity                                                                                                      | cholesterol metabolic process, endocytosis, lipid metabolic process, lipid transport, multicellular organismal development, steroid metabolic process, transport                                                                                                                                                                                                                                                                                    |
| spectrin alpha 1                                                            | Spna1     | NP_035595    | 280      | 1             | cortical cytoskeleton, cytoplasm, cytoskeleton, membrane, spectrin                               | actin binding, calcium ion binding                                                                                     | actin filament capping, hemopoiesis, porphyrin biosynthetic process, regulation of cell shape                                                                                                                                                                                                                                                                                                                                                       |
| striatin, calmodulin binding protein                                        | Strn      | NP_035630    | 86       | 1             | cellular_component, cytoplasm, membrane                                                          | calmodulin binding, molecular_function                                                                                 | biological_process                                                                                                                                                                                                                                                                                                                                                                                                                                  |
| syntaxin binding protein 2                                                  | Stxbp2    | NP_035633    | 66       | 1             | not classified                                                                                   | syntaxin binding                                                                                                       | protein transport, transport, vesicle docking during exocytosis, vesicle mediated transport                                                                                                                                                                                                                                                                                                                                                         |
| upstream binding transcription factor, RNA polymerase I isoform 1           | Ubf1      | NP_035681    | 89       | 1             | nucleolus, nucleus                                                                               | DNA binding, protein binding                                                                                           | regulation of transcription, transcription                                                                                                                                                                                                                                                                                                                                                                                                          |
| sex determining region Y                                                    | Sry       | NP_035694    | 49       | 1             | cytoplasm, nucleus                                                                               | DNA bending activity, DNA binding, protein binding                                                                     | cell differentiation, male sex determination, regulation of transcription, sex determination, sex differentiation, transcription                                                                                                                                                                                                                                                                                                                    |
| THO complex 4                                                               | Thoc4     | NP_035698    | 27       | 1             | cytoplasm, nucleus, spliceosomal complex                                                         | nucleic acid binding, nucleotide binding, RNA binding, single-stranded DNA binding                                     | mRNA processing, mRNA transport, RNA splicing, transport                                                                                                                                                                                                                                                                                                                                                                                            |
| testis expressed gene 264                                                   | Tex264    | NP_035703    | 34       | 1             | not classified                                                                                   | not classified                                                                                                         | not classified                                                                                                                                                                                                                                                                                                                                                                                                                                      |

| Protein Name                                               | Gene Name | Accession No | Mw (kDa) | Peptide Count | GO Component                                                                               | GO Function                                                                                                                                                                                                                                                                                                                         | GO Process                                                                                                                                                                                                 |
|------------------------------------------------------------|-----------|--------------|----------|---------------|--------------------------------------------------------------------------------------------|-------------------------------------------------------------------------------------------------------------------------------------------------------------------------------------------------------------------------------------------------------------------------------------------------------------------------------------|------------------------------------------------------------------------------------------------------------------------------------------------------------------------------------------------------------|
| nuclear receptor subfamily 2, group C, member 1            | Nr2c1     | NP_035759    | 65       | 1             | cellular_component, nucleus                                                                | DNA binding, histone deacetylase binding, ligand-dependent nuclear receptor activity, metal ion binding, protein binding, protein homodimerization activity, receptor activity, sequence-specific DNA binding, steroid hormone receptor activity, transcription factor activity, transcription repressor activity, zinc ion binding | negative regulation of transcription from RNA polymerase II promoter, regulation of transcription, regulation of transcription, DNA-dependent, transcription                                               |
| trypsin 4                                                  | Try4      | NP_035776    | 26       | 1             | cellular_component                                                                         | hydrolase activity, molecular_function, peptidase activity, serine-type peptidase activity                                                                                                                                                                                                                                          | biological_process                                                                                                                                                                                         |
| titin isoform N2-A                                         | Ttn       | NP_035782    | 3522     | 1             | A band, I band, M band, muscle myosin complex, sarcomere, Z disc                           | protein binding, structural constituent of cytoskeleton                                                                                                                                                                                                                                                                             | adult heart development, cardiac myofibril assembly, forward locomotion, heart morphogenesis, in utero embryonic development, muscle contraction, sarcomere organization, striated muscle cell development |
| uncoupling protein 2 (mitochondrial, proton carrier)       | Ucp2      | NP_035801    | 33       | 1             | integral to membrane, membrane, mitochondrial inner membrane, mitochondrion                | binding                                                                                                                                                                                                                                                                                                                             | mitochondrial transport, transport                                                                                                                                                                         |
| utrophin                                                   | Utn       | NP_035812    | 393      | 1             | cell junction, dystrophin-associated glycoprotein complex, neuromuscular junction, synapse | actin binding, protein binding                                                                                                                                                                                                                                                                                                      | adult somatic muscle development                                                                                                                                                                           |
| villin-like                                                | Vill      | NP_035830    | 87       | 1             | not classified                                                                             | actin binding, calcium ion binding                                                                                                                                                                                                                                                                                                  | actin filament capping, cytoskeleton organization                                                                                                                                                          |
| xanthine dehydrogenase                                     | Xdh       | NP_035853    | 147      | 1             | peroxisome                                                                                 | 2 iron, 2 sulfur cluster binding, catalytic activity, electron carrier activity, FAD binding, iron ion binding, iron-sulfur cluster binding, metal ion binding, molybdenum ion binding, oxidoreductase activity, xanthine dehydrogenase activity, xanthine oxidase activity                                                         | lactation, oxidation reduction, regulation of epithelial cell differentiation                                                                                                                              |
| cyclin D binding myb-like transcription factor 1 isoform 1 | Dmtf1     | NP_035936    | 85       | 1             | nucleus                                                                                    | DNA binding                                                                                                                                                                                                                                                                                                                         | cell cycle, regulation of transcription, transcription                                                                                                                                                     |
| germ cell-less                                             | Gmcl1     | NP_035948    | 60       | 1             | nuclear envelope, nuclear matrix, nucleus                                                  | protein binding                                                                                                                                                                                                                                                                                                                     | cell differentiation, multicellular organismal development, regulation of transcription, spermatogenesis                                                                                                   |
| phosphatidylinositol glycan anchor biosynthesis, class Q   | Pigq      | NP_035952    | 66       | 1             | integral to membrane, membrane                                                             | phosphatidylinositol N-acetylglucosaminyltransferase activity, transferase activity, transferase activity, transferring glycosyl groups                                                                                                                                                                                             | GPI anchor biosynthetic process                                                                                                                                                                            |

| Protein Name                                          | Gene Name | Accession No | Mw (kDa) | Peptide Count | GO Component                                                    | GO Function                                                                                                                                                                                                                                     | GO Process                                                                                                                                                                                                                                                                   |
|-------------------------------------------------------|-----------|--------------|----------|---------------|-----------------------------------------------------------------|-------------------------------------------------------------------------------------------------------------------------------------------------------------------------------------------------------------------------------------------------|------------------------------------------------------------------------------------------------------------------------------------------------------------------------------------------------------------------------------------------------------------------------------|
| monoglyceride lipase                                  | Mgll      | NP_035974    | 33       | 1             | not classified                                                  | acylglycerol lipase activity, carboxylesterase activity, hydrolase activity                                                                                                                                                                     | not classified                                                                                                                                                                                                                                                               |
| 3'-phosphoadenosine 5'-phosphosulfate synthase 1      | Papss1    | NP_035993    | 71       | 1             | sulfate adenyltransferase complex (ATP)                         | adenylsulfate kinase activity, ATP binding, catalytic activity, kinase activity, nucleotide binding, nucleotidyltransferase activity, sulfate adenyltransferase (ATP) activity, transferase activity, transferring phosphorus-containing groups | 3'-phosphoadenosine 5'-phosphosulfate biosynthetic process, sulfate assimilation                                                                                                                                                                                             |
| proteasome 26S ATPase subunit 4                       | Psmc4     | NP_036004    | 47       | 1             | cytoplasm, nucleus, proteasome complex                          | ATP binding, hydrolase activity, nucleoside-triphosphatase activity, nucleotide binding                                                                                                                                                         | blastocyst development, protein catabolic process                                                                                                                                                                                                                            |
| protein tyrosine phosphatase, non-receptor type 21    | Ptpn21    | NP_036007    | 133      | 1             | cytoplasm, cytoskeleton                                         | binding, hydrolase activity, phosphatase activity, phosphoprotein phosphatase activity, protein tyrosine phosphatase activity                                                                                                                   | dephosphorylation, protein amino acid dephosphorylation                                                                                                                                                                                                                      |
| 5'-3' exoribonuclease 2                               | Xrn2      | NP_036047    | 109      | 1             | intracellular, nucleus                                          | 5'-3' exoribonuclease activity, exonuclease activity, hydrolase activity, metal ion binding, nuclease activity, nucleic acid binding, zinc ion binding                                                                                          | cell growth, DNA recombination, DNA repair, microtubule-based process, mRNA processing, nucleobase, nucleoside, nucleotide and nucleic acid metabolic process, regulation of transcription, RNA metabolic process, spermatogenesis, transcription, transcription termination |
| annexin A10                                           | Anxa10    | NP_036052    | 35       | 1             | mitochondrion                                                   | calcium ion binding, calcium-dependent phospholipid binding                                                                                                                                                                                     | not classified                                                                                                                                                                                                                                                               |
| mitogen-activated protein kinase binding protein 1    | Mapkbp1   | NP_036071    | 163      | 1             | cellular_component                                              | protein binding                                                                                                                                                                                                                                 | activation of JNKK activity                                                                                                                                                                                                                                                  |
| lysophospholipase 2                                   | Lypla2    | NP_036072    | 25       | 1             | cytoplasm                                                       | hydrolase activity                                                                                                                                                                                                                              | fatty acid metabolic process, lipid metabolic process                                                                                                                                                                                                                        |
| mitogen activated protein kinase kinase kinase 4      | Map3k4    | NP_036078    | 180      | 1             | cytoplasm                                                       | ATP binding, kinase activity, magnesium ion binding, MAP kinase kinase kinase activity, metal ion binding, nucleotide binding, protein kinase activity, protein serine/threonine kinase activity, transferase activity                          | protein amino acid phosphorylation                                                                                                                                                                                                                                           |
| proteasome (prosome, macropain) subunit, alpha type 6 | Psm6      | NP_036098    | 27       | 1             | cytoplasm, nucleus, proteasome complex, proteasome core complex | endopeptidase activity, hydrolase activity, peptidase activity, threonine-type endopeptidase activity                                                                                                                                           | proteolysis involved in cellular protein catabolic process, ubiquitin-dependent protein catabolic process                                                                                                                                                                    |
| COP9 signalosome subunit 4                            | Cops4     | NP_036131    | 46       | 1             | cytoplasm, nucleus, signalosome                                 | not classified                                                                                                                                                                                                                                  | not classified                                                                                                                                                                                                                                                               |

| Protein Name                                 | Gene Name | Accession No | Mw (kDa) | Peptide Count | GO Component                                                       | GO Function                                                                                                                                                                               | GO Process                                                                                                                                                                                                                                                                                                                                                                                                     |
|----------------------------------------------|-----------|--------------|----------|---------------|--------------------------------------------------------------------|-------------------------------------------------------------------------------------------------------------------------------------------------------------------------------------------|----------------------------------------------------------------------------------------------------------------------------------------------------------------------------------------------------------------------------------------------------------------------------------------------------------------------------------------------------------------------------------------------------------------|
| polymerase (DNA directed), kappa             | Polk      | NP_036178    | 96       | 1             | nucleus                                                            | damaged DNA binding, DNA binding, DNA-directed DNA polymerase activity, magnesium ion binding, metal ion binding, nucleotidyltransferase activity, transferase activity, zinc ion binding | DNA repair, DNA replication, response to DNA damage stimulus                                                                                                                                                                                                                                                                                                                                                   |
| adducin 2 (beta)                             | Add2      | NP_038486    | 81       | 1             | cytoplasm, cytoskeleton, membrane, plasma membrane                 | actin binding, calmodulin binding, metal ion binding, structural molecule activity                                                                                                        | hemopoiesis                                                                                                                                                                                                                                                                                                                                                                                                    |
| adrenergic receptor, beta 3                  | Adrb3     | NP_038490    | 43       | 1             | integral to membrane, membrane, membrane fraction, plasma membrane | adrenoceptor activity, beta-3 adrenergic receptor binding, beta-adrenergic receptor activity, G-protein coupled receptor activity, receptor activity, signal transducer activity          | activation of adenylate cyclase activity by G-protein signaling pathway, brown fat cell differentiation, diet induced thermogenesis, G-protein coupled receptor protein signaling pathway, heat generation, negative regulation of multicellular organism growth, response to cold, signal transduction, vasodilation by norepinephrine-epinephrine involved in regulation of systemic arterial blood pressure |
| clusterin                                    | Clu       | NP_038520    | 52       | 1             | extracellular region                                               | not classified                                                                                                                                                                            | cell death                                                                                                                                                                                                                                                                                                                                                                                                     |
| eukaryotic translation initiation factor 4A2 | Eif4a2    | NP_038534    | 46       | 1             | not classified                                                     | ATP binding, ATP-dependent helicase activity, helicase activity, hydrolase activity, nucleic acid binding, nucleotide binding, RNA binding, translation initiation factor activity        | response to protein stimulus, translation                                                                                                                                                                                                                                                                                                                                                                      |

| Protein Name                                                          | Gene Name | Accession No | Mw (kDa) | Peptide Count | GO Component                                                                                                                                                                                                                                         | GO Function                                                                                                         | GO Process                                                                                                                                                                                                                                                                                                                                                                                                                                                                                                                                                                                                                                                                                                                                                                                                                                                                                  |
|-----------------------------------------------------------------------|-----------|--------------|----------|---------------|------------------------------------------------------------------------------------------------------------------------------------------------------------------------------------------------------------------------------------------------------|---------------------------------------------------------------------------------------------------------------------|---------------------------------------------------------------------------------------------------------------------------------------------------------------------------------------------------------------------------------------------------------------------------------------------------------------------------------------------------------------------------------------------------------------------------------------------------------------------------------------------------------------------------------------------------------------------------------------------------------------------------------------------------------------------------------------------------------------------------------------------------------------------------------------------------------------------------------------------------------------------------------------------|
| fibroblast growth factor 9                                            | Fgf9      | NP_038546    | 23       | 1             | extracellular region, extracellular space                                                                                                                                                                                                            | growth factor activity, heparin binding                                                                             | angiogenesis, cell differentiation, cell-cell signaling, chondrocyte differentiation, embryonic gut development, embryonic limb morphogenesis, embryonic skeletal system development, fibroblast growth factor receptor signaling pathway, inner ear morphogenesis, lung development, male gonad development, male sex determination, multicellular organismal development, negative regulation of Wnt receptor signaling pathway, osteoblast differentiation, positive regulation of cardiac muscle cell proliferation, positive regulation of cell division, positive regulation of cell proliferation, positive regulation of epithelial cell proliferation, positive regulation of fibroblast growth factor receptor signaling pathway, positive regulation of MAPKKK cascade, positive regulation of mesenchymal cell proliferation, positive regulation of smoothed signaling pathway |
| platelet-activating factor acetylhydrolase, isoform 1b, beta1 subunit | Pafah1b1  | NP_038653    | 47       | 1             | cell leading edge, centrosome, cytoplasm, cytoskeleton, membrane, microtubule, microtubule associated complex, microtubule cytoskeleton, motile primary cilium, nonmotile primary cilium, nuclear envelope, nucleus, perinuclear region of cytoplasm | hydrolase activity, microtubule binding, phosphoprotein binding, protein binding, protein homodimerization activity | acrosome assembly, actin cytoskeleton organization, adult locomotory behavior, cell cycle, cell differentiation, cell division, cell migration, cerebral cortex development, hippocampus development, layer formation in the cerebral cortex, learning or memory, lipid catabolic process, microtubule cytoskeleton organization, mitosis, multicellular organismal development, nervous system development, neuroblast proliferation, neuromuscular process controlling balance, neuron migration, nuclear envelope disassembly, regulation of Rho GTPase activity, retrograde axon cargo transport, synaptic transmission, transmission of nerve impulse, transport, vesicle transport along microtubule                                                                                                                                                                                  |
| solute carrier family 22 member 2                                     | Slc22a2   | NP_038695    | 62       | 1             | integral to membrane, integral to plasma membrane, membrane                                                                                                                                                                                          | ion transmembrane transporter activity, organic cation transmembrane transporter activity, transporter activity     | cation transport, ion transport, organic cation transport, transport                                                                                                                                                                                                                                                                                                                                                                                                                                                                                                                                                                                                                                                                                                                                                                                                                        |

| Protein Name                                              | Gene Name | Accession No | Mw (kDa) | Peptide Count | GO Component                                                                                                                | GO Function                                                                                                                                                                                                                                                                                         | GO Process                                                                                                                                                                                                                                                                                                                                                             |
|-----------------------------------------------------------|-----------|--------------|----------|---------------|-----------------------------------------------------------------------------------------------------------------------------|-----------------------------------------------------------------------------------------------------------------------------------------------------------------------------------------------------------------------------------------------------------------------------------------------------|------------------------------------------------------------------------------------------------------------------------------------------------------------------------------------------------------------------------------------------------------------------------------------------------------------------------------------------------------------------------|
| spectrin beta 1                                           | Spnb1     | NP_038703    | 268      | 1             | cortical cytoskeleton, cytoplasm, cytoskeleton, membrane, plasma membrane, spectrin                                         | actin binding, structural constituent of cytoskeleton                                                                                                                                                                                                                                               | actin filament capping, porphyrin biosynthetic process                                                                                                                                                                                                                                                                                                                 |
| suppressor of Ty 5 homolog                                | Supt5h    | NP_038704    | 121      | 1             | nucleus                                                                                                                     | transcription elongation regulator activity                                                                                                                                                                                                                                                         | positive regulation of RNA elongation from RNA polymerase II promoter, regulation of transcription, regulation of transcription from RNA polymerase II promoter, transcription                                                                                                                                                                                         |
| t-complex protein 1                                       | Tcp1      | NP_038714    | 60       | 1             | chaperonin-containing T-complex, cytoplasm, microtubule organizing center, nuclear heterochromatin, pericentriolar material | ATP binding, nucleotide binding, protein binding, unfolded protein binding                                                                                                                                                                                                                          | cellular protein metabolic process, protein folding                                                                                                                                                                                                                                                                                                                    |
| nuclear receptor subfamily 2, group E, member 3           | Nr2e3     | NP_038736    | 43       | 1             | nucleus, transcription factor complex                                                                                       | DNA binding, ligand-dependent nuclear receptor activity, metal ion binding, protein binding, receptor activity, sequence-specific DNA binding, steroid binding, steroid hormone receptor activity, transcription factor activity, zinc ion binding                                                  | negative regulation of cell proliferation, negative regulation of transcription from RNA polymerase II promoter, positive regulation of rhodopsin gene expression, positive regulation of transcription from RNA polymerase II promoter, regulation of transcription, regulation of transcription, DNA-dependent, retina development in camera-type eye, transcription |
| thioredoxin reductase 2 precursor                         | Txnr2     | NP_038739    | 57       | 1             | cytoplasm, mitochondrion                                                                                                    | FAD binding, NADP or NADPH binding, oxidoreductase activity, protein binding, selenium binding, thioredoxin-disulfide reductase activity                                                                                                                                                            | cell redox homeostasis, heart development, hemopoiesis, oxidation reduction, response to oxygen radical                                                                                                                                                                                                                                                                |
| COP9 signalosome subunit 5                                | Cops5     | NP_038743    | 38       | 1             | cytoplasm, nucleus, signalosome, transcription factor complex                                                               | hydrolase activity, metal ion binding, metalloproteinase activity, peptidase activity, protein binding, transcription coactivator activity, zinc ion binding                                                                                                                                        | regulation of cell cycle, regulation of transcription, DNA-dependent                                                                                                                                                                                                                                                                                                   |
| eukaryotic translation initiation factor 2 alpha kinase 4 | Eif2ak4   | NP_038747    | 187      | 1             | cytoplasm, cytosolic ribosome                                                                                               | aminoacyl-tRNA ligase activity, ATP binding, eukaryotic translation initiation factor 2alpha kinase activity, kinase activity, nucleotide binding, protein binding, protein kinase activity, protein serine/threonine kinase activity, transferase activity, translation initiation factor activity | cellular response to starvation, endoplasmic reticulum unfolded protein response, negative regulation of translation, protein amino acid phosphorylation, regulation of translational initiation, regulation of translational initiation in response to stress, translation, tRNA aminoacylation for protein translation                                               |
| MAX-interacting protein                                   | Mga       | NP_038748    | 333      | 1             | nucleus, transcription factor complex                                                                                       | DNA binding, transcription factor activity, transcription regulator activity                                                                                                                                                                                                                        | regulation of transcription, regulation of transcription, DNA-dependent, transcription                                                                                                                                                                                                                                                                                 |

| Protein Name                                              | Gene Name | Accession No | Mw (kDa) | Peptide Count | GO Component                                                                                                          | GO Function                                                                                                                                                                      | GO Process                                                                                                                                             |
|-----------------------------------------------------------|-----------|--------------|----------|---------------|-----------------------------------------------------------------------------------------------------------------------|----------------------------------------------------------------------------------------------------------------------------------------------------------------------------------|--------------------------------------------------------------------------------------------------------------------------------------------------------|
| Nik related kinase                                        | Nrk       | NP_038752    | 164      | 1             | not classified                                                                                                        | ATP binding, kinase activity, nucleotide binding, protein kinase activity, protein serine/threonine kinase activity, small GTPase regulator activity, transferase activity       | activation of JNKK activity, protein amino acid phosphorylation                                                                                        |
| phospholipase A2, group VII                               | Pla2g7    | NP_038765    | 49       | 1             | extracellular region                                                                                                  | 1-alkyl-2-acetylglycerophosphocholine esterase activity, hydrolase activity                                                                                                      | inflammatory response, lipid catabolic process                                                                                                         |
| nibrin                                                    | Nbn       | NP_038780    | 84       | 1             | chromosome, chromosome, telomeric region, intracellular, nucleus, replication fork                                    | damaged DNA binding                                                                                                                                                              | cell cycle, cell proliferation, DNA damage checkpoint, DNA repair, meiosis, neuromuscular process controlling balance, response to DNA damage stimulus |
| SH2 domain containing 3C                                  | Sh2d3c    | NP_038809    | 94       | 1             | cytoplasm, intracellular, membrane                                                                                    | guanyl-nucleotide exchange factor activity, protein binding, transmembrane receptor protein tyrosine kinase adaptor protein activity                                             | signal transduction, small GTPase mediated signal transduction                                                                                         |
| polo-like kinase 3                                        | Plk3      | NP_038835    | 72       | 1             | membrane                                                                                                              | ATP binding, kinase activity, nucleotide binding, polo kinase activity, protein binding, protein kinase activity, protein serine/threonine kinase activity, transferase activity | cell cycle, protein amino acid phosphorylation                                                                                                         |
| GTP binding protein 1                                     | Gtbbp1    | NP_038846    | 72       | 1             | not classified                                                                                                        | GTP binding, GTPase activity, nucleotide binding                                                                                                                                 | not classified                                                                                                                                         |
| RAB GTPase activating protein 1-like isoform a            | Rabgap1l  | NP_038890    | 92       | 1             | early endosome, Golgi apparatus, intracellular, nucleus                                                               | GTPase activator activity, Rab GTPase activator activity                                                                                                                         | regulation of protein localization, regulation of Rab GTPase activity                                                                                  |
| phospholipase C-like 2                                    | Plcl2     | NP_038908    | 126      | 1             | cytoplasm                                                                                                             | calcium ion binding, phosphoinositide phospholipase C activity, phospholipase C activity, phosphoric diester hydrolase activity, signal transducer activity                      | intracellular signaling cascade, lipid metabolic process, signal transduction                                                                          |
| sex comb on midleg homolog 1                              | Scmh1     | NP_038911    | 74       | 1             | nucleus                                                                                                               | protein binding, transcription repressor activity                                                                                                                                | multicellular organismal development, negative regulation of transcription, regulation of transcription, transcription                                 |
| translocase of inner mitochondrial membrane 8 homolog a   | Timm8a1   | NP_038926    | 11       | 1             | membrane, mitochondrial inner membrane, mitochondrial intermembrane space, protein transporter complex, mitochondrion | metal ion binding, zinc ion binding                                                                                                                                              | protein import into mitochondrial inner membrane, protein targeting to mitochondrion, protein transport, transmembrane transport, transport            |
| vesicle-associated membrane protein, associated protein A | Vapa      | NP_038961    | 28       | 1             | endoplasmic reticulum, integral to membrane, membrane, microtubule, plasma membrane                                   | molecular_function, structural molecule activity                                                                                                                                 | biological_process                                                                                                                                     |



| Protein Name                                                  | Gene Name | Accession No | Mw (kDa) | Peptide Count | GO Component                                                                                                                                 | GO Function                                                                                                                                                                                                                                          | GO Process                                                                                                                                                                                         |
|---------------------------------------------------------------|-----------|--------------|----------|---------------|----------------------------------------------------------------------------------------------------------------------------------------------|------------------------------------------------------------------------------------------------------------------------------------------------------------------------------------------------------------------------------------------------------|----------------------------------------------------------------------------------------------------------------------------------------------------------------------------------------------------|
| ATPase, class II, type 9A                                     | Atp9a     | NP_056546    | 119      | 1             | integral to membrane, membrane                                                                                                               | ATP binding, ATPase activity, coupled to transmembrane movement of ions, phosphorylative mechanism, catalytic activity, hydrolase activity, magnesium ion binding, metal ion binding, nucleotide binding, phospholipid-translocating ATPase activity | ATP biosynthetic process, metabolic process, phospholipid transport                                                                                                                                |
| shroom isoform 1                                              | Shroom3   | NP_056571    | 214      | 1             | adherens junction, apical junction complex, apical part of cell, apical plasma membrane, cell junction, cytoplasm, cytoskeleton, microtubule | actin binding, protein binding                                                                                                                                                                                                                       | actin cytoskeleton organization, columnar/cuboidal epithelial cell development, multicellular organismal development, neural tube closure, pattern specification process, regulation of cell shape |
| patatin-like phospholipase domain containing 6                | Pnpla6    | NP_056616    | 147      | 1             | endoplasmic reticulum, endoplasmic reticulum membrane, integral to membrane, membrane, membrane fraction                                     | carboxylesterase activity, hydrolase activity, lysophospholipase activity                                                                                                                                                                            | angiogenesis, lipid catabolic process, lipid metabolic process, organ morphogenesis, phosphatidylcholine metabolic process                                                                         |
| chloride channel 5                                            | Clcn5     | NP_057900    | 83       | 1             | endosome, Golgi apparatus, integral to membrane, membrane, plasma membrane                                                                   | antiporter activity, ATP binding, chloride ion binding, ion channel activity, nucleotide binding, voltage-gated chloride channel activity                                                                                                            | chloride transport, endocytosis, ion transport, transport                                                                                                                                          |
| H2A histone family, member Z                                  | H2afz     | NP_058030    | 14       | 1             | Barr body, chromosome, nucleosome, nucleus                                                                                                   | DNA binding                                                                                                                                                                                                                                          | multicellular organismal development, nucleosome assembly                                                                                                                                          |
| C-type lectin, superfamily member 13                          | Clec4f    | NP_058031    | 61       | 1             | integral to membrane, membrane                                                                                                               | binding, receptor activity, sugar binding                                                                                                                                                                                                            | endocytosis                                                                                                                                                                                        |
| serine/arginine-rich protein specific kinase 1                | Srpk1     | NP_058075    | 73       | 1             | cytoplasm, nucleus                                                                                                                           | ATP binding, kinase activity, magnesium ion binding, nucleotide binding, protein binding, protein kinase activity, protein serine/threonine kinase activity, transferase activity                                                                    | cell differentiation, chromosome segregation, mRNA processing, protein amino acid phosphorylation, protein kinase cascade, regulation of mRNA processing, RNA splicing                             |
| Y box protein 2                                               | Ybx2      | NP_058571    | 38       | 1             | cytoplasm, nucleus, polysome, ribonucleoprotein complex                                                                                      | chromatin binding, DNA binding, lipid binding, mRNA 3'-UTR binding, mRNA binding, nucleic acid binding, ribonucleoprotein binding, RNA binding, translation regulator activity                                                                       | mRNA stabilization, negative regulation of binding, negative regulation of translation, oogenesis, regulation of transcription, DNA-dependent, spermatid development                               |
| keratin 35                                                    | Krt35     | NP_058576    | 48       | 1             | intermediate filament                                                                                                                        | structural molecule activity                                                                                                                                                                                                                         | not classified                                                                                                                                                                                     |
| heterogeneous nuclear ribonucleoprotein C                     | Hnrnpc    | NP_058580    | 34       | 1             | nucleus, pronucleus, ribonucleoprotein complex, spliceosomal complex                                                                         | mRNA binding, nucleic acid binding, nucleotide binding, RNA binding                                                                                                                                                                                  | mRNA processing, RNA splicing                                                                                                                                                                      |
| claudin 7                                                     | Cldn7     | NP_058583    | 22       | 1             | cell junction, integral to membrane, membrane, plasma membrane, tight junction                                                               | structural molecule activity                                                                                                                                                                                                                         | not classified                                                                                                                                                                                     |
| UDP-GlcNAc:betaGal beta-1,3-N-acetylglucosaminyltransferase 2 | B3gnt2    | NP_058584    | 46       | 1             | Golgi apparatus, integral to membrane, membrane                                                                                              | galactosyltransferase activity, manganese ion binding, transferase activity, transferase activity, transferring glycosyl groups                                                                                                                      | axon guidance, protein amino acid glycosylation, sensory perception of smell                                                                                                                       |
| tropomodulin 3                                                | Tmod3     | NP_058659    | 40       | 1             | cytoplasm, cytoskeleton, filamentous actin, lamellipodium, ruffle                                                                            | actin binding, microtubule minus-end binding, tropomyosin binding                                                                                                                                                                                    | negative regulation of cell motion, pointed-end actin filament capping                                                                                                                             |

| Protein Name                                                      | Gene Name | Accession No | Mw (kDa) | Peptide Count | GO Component                                                                                       | GO Function                                                                                                                                                                                                                 | GO Process                                                                                                                                                                                                                                                                                                                                                                                                                                                                         |
|-------------------------------------------------------------------|-----------|--------------|----------|---------------|----------------------------------------------------------------------------------------------------|-----------------------------------------------------------------------------------------------------------------------------------------------------------------------------------------------------------------------------|------------------------------------------------------------------------------------------------------------------------------------------------------------------------------------------------------------------------------------------------------------------------------------------------------------------------------------------------------------------------------------------------------------------------------------------------------------------------------------|
| 3-phosphoglycerate dehydrogenase                                  | Phgdh     | NP_058662    | 57       | 1             | not classified                                                                                     | binding, catalytic activity, cofactor binding, NAD or NADH binding, oxidoreductase activity, oxidoreductase activity, acting on the CH-OH group of donors, NAD or NADP as acceptor, phosphoglycerate dehydrogenase activity | cell cycle process, cellular amino acid biosynthetic process, gamma-aminobutyric acid metabolic process, glial cell development, glutamine metabolic process, glycine metabolic process, L-serine biosynthetic process, L-serine metabolic process, metabolic process, neuronal tube development, neurogenesis, neuron projection development, oxidation reduction, regulation of gene expression, spinal cord development, taurine metabolic process, threonine metabolic process |
| caseinolytic protease, ATP-dependent, proteolytic subunit homolog | Clpp      | NP_059089    | 30       | 1             | mitochondrion                                                                                      | ATP binding, hydrolase activity, nucleotide binding, peptidase activity, protein binding, serine-type endopeptidase activity, serine-type peptidase activity                                                                | misfolded or incompletely synthesized protein catabolic process, proteolysis                                                                                                                                                                                                                                                                                                                                                                                                       |
| PAK-interacting exchange factor beta isoform c                    | Arhgef7   | NP_059098    | 73       | 1             | intracellular                                                                                      | guanyl-nucleotide exchange factor activity, protein binding, Rho guanyl-nucleotide exchange factor activity                                                                                                                 | intracellular signaling cascade, regulation of Rho protein signal transduction                                                                                                                                                                                                                                                                                                                                                                                                     |
| golgi autoantigen, golgin subfamily a, 4                          | Golga4    | NP_061218    | 258      | 1             | cytoplasm, Golgi apparatus, membrane                                                               | not classified                                                                                                                                                                                                              | not classified                                                                                                                                                                                                                                                                                                                                                                                                                                                                     |
| GIPC PDZ domain containing family, member 1                       | Gipc1     | NP_061241    | 36       | 1             | cytoplasm, cytosol, dendritic shaft, dendritic spine, membrane, synaptic vesicle, vesicle membrane | actin binding, GTPase activator activity, myosin binding, protein binding, protein homodimerization activity                                                                                                                | endothelial cell migration, glutamate secretion, G-protein coupled receptor protein signaling pathway, negative regulation of proteasomal ubiquitin-dependent protein catabolic process, positive regulation of transforming growth factor beta receptor signaling pathway, protein targeting, regulation of protein stability, regulation of synaptic plasticity, synaptic transmission                                                                                           |
| nuclear factor of activated T-cells 5 isoform b                   | Nfat5     | NP_061293    | 168      | 1             | cytoplasm, nucleus                                                                                 | DNA binding, protein binding, transcription factor activity                                                                                                                                                                 | cytokine production, positive regulation of transcription from RNA polymerase II promoter, regulation of transcription, regulation of transcription, DNA-dependent, transcription, transcription, DNA-dependent                                                                                                                                                                                                                                                                    |

| Protein Name                                                                        | Gene Name | Accession No | Mw (kDa) | Peptide Count | GO Component                                                                                                                        | GO Function                                                                                                                                                                                                | GO Process                                                                                                                                                                                                                                                                                                                                                                 |
|-------------------------------------------------------------------------------------|-----------|--------------|----------|---------------|-------------------------------------------------------------------------------------------------------------------------------------|------------------------------------------------------------------------------------------------------------------------------------------------------------------------------------------------------------|----------------------------------------------------------------------------------------------------------------------------------------------------------------------------------------------------------------------------------------------------------------------------------------------------------------------------------------------------------------------------|
| SH2B adaptor protein 2                                                              | Sh2b2     | NP_061295    | 67       | 1             | actin filament, cytoplasmic membrane, plasma membrane, ruffle, stress fiber                                                         | protein binding, SH3/SH2 adaptor activity, signal transducer activity, transmembrane receptor protein tyrosine kinase adaptor protein activity                                                             | actin cytoskeleton organization, antigen receptor-mediated signaling pathway, B-1 B cell homeostasis, brown fat cell differentiation, cytokine-mediated signaling pathway, glucose homeostasis, insulin receptor signaling pathway, intracellular signaling cascade, negative regulation of glucose import, regulation of immune response, regulation of metabolic process |
| basic FGF repressed, zinc binding protein                                           | Uqcc      | NP_061376    | 24       | 1             | cytoplasmic membrane-bounded vesicle, cytoplasmic vesicle                                                                           | protein binding                                                                                                                                                                                            | biological_process                                                                                                                                                                                                                                                                                                                                                         |
| roundabout homolog 1                                                                | Robo1     | NP_062286    | 176      | 1             | axolemma, integral to membrane, membrane                                                                                            | protein binding, protein heterodimerization activity, receptor activity                                                                                                                                    | axon guidance, cell differentiation, chemotaxis, multicellular organismal development, nervous system development                                                                                                                                                                                                                                                          |
| unc93 homolog B                                                                     | Unc93b1   | NP_062322    | 67       | 1             | endoplasmic reticulum, integral to membrane, membrane                                                                               | molecular_function                                                                                                                                                                                         | antigen processing and presentation of exogenous peptide antigen via MHC class II, toll-like receptor signaling pathway                                                                                                                                                                                                                                                    |
| amyloid beta (A4) precursor protein-binding, family B, member 1 interacting protein | Apbb1ip   | NP_062329    | 74       | 1             | cell junction, cell projection, cytoplasm, cytoskeleton, membrane, plasma membrane                                                  | not classified                                                                                                                                                                                             | signal transduction                                                                                                                                                                                                                                                                                                                                                        |
| glucose-6-phosphate dehydrogenase 2                                                 | G6pd2     | NP_062341    | 59       | 1             | not classified                                                                                                                      | binding, catalytic activity, glucose-6-phosphate dehydrogenase activity, oxidoreductase activity                                                                                                           | carbohydrate metabolic process, glucose metabolic process, metabolic process, oxidation reduction                                                                                                                                                                                                                                                                          |
| acyl-CoA synthetase long-chain family member 4 isoform 2                            | Acsl4     | NP_062350    | 74       | 1             | endoplasmic reticulum, integral to membrane, membrane, microsomal membrane, mitochondrial outer membrane, mitochondrion, peroxisome | ATP binding, catalytic activity, ligase activity, long-chain-fatty-acid-CoA ligase activity, magnesium ion binding, nucleotide binding                                                                     | fatty acid metabolic process, lipid metabolic process, metabolic process, regulation of fatty acid metabolic process                                                                                                                                                                                                                                                       |
| ubiquitin carboxyl-terminal esterase L5                                             | Uchl5     | NP_062508    | 38       | 1             | intracellular, proteasome complex                                                                                                   | cysteine-type peptidase activity, hydrolase activity, peptidase activity, ubiquitin thiolesterase activity                                                                                                 | modification-dependent protein catabolic process, ubiquitin-dependent protein catabolic process                                                                                                                                                                                                                                                                            |
| REV1-like                                                                           | Rev1      | NP_062516    | 137      | 1             | intracellular, nucleus                                                                                                              | damaged DNA binding, deoxycytidyl transferase activity, DNA binding, DNA-directed DNA polymerase activity, magnesium ion binding, metal ion binding, nucleotidyltransferase activity, transferase activity | DNA repair, DNA replication, error-prone postreplication DNA repair, response to DNA damage stimulus                                                                                                                                                                                                                                                                       |
| calcium channel, voltage-dependent, alpha 1F subunit                                | Cacna1f   | NP_062528    | 222      | 1             | cell soma, integral to membrane, integral to membrane of membrane fraction, membrane, voltage-gated calcium channel complex         | calcium channel activity, calcium ion binding, ion channel activity, voltage-gated calcium channel activity, voltage-gated ion channel activity                                                            | axonogenesis, calcium ion transport, cellular calcium ion homeostasis, dendrite morphogenesis, ion transport, response to stimulus, transport, visual perception                                                                                                                                                                                                           |

| Protein Name                                                     | Gene Name | Accession No | Mw (kDa) | Peptide Count | GO Component                                                                                          | GO Function                                                                                                                                                                                                                                                      | GO Process                                                                                                                                                                                                                                |
|------------------------------------------------------------------|-----------|--------------|----------|---------------|-------------------------------------------------------------------------------------------------------|------------------------------------------------------------------------------------------------------------------------------------------------------------------------------------------------------------------------------------------------------------------|-------------------------------------------------------------------------------------------------------------------------------------------------------------------------------------------------------------------------------------------|
| phosphofructokinase, platelet                                    | Pfkip     | NP_062677    | 85       | 1             | 6-phosphofructokinase complex, cytoplasm, cytosol                                                     | 6-phosphofructokinase activity, ATP binding, kinase activity, magnesium ion binding, metal ion binding, nucleotide binding, transferase activity                                                                                                                 | glycolysis                                                                                                                                                                                                                                |
| sorting nexin 1                                                  | Snx1      | NP_062701    | 59       | 1             | endosome, Golgi apparatus, membrane                                                                   | phosphoinositide binding protein binding, protein transporter activity                                                                                                                                                                                           | cell communication, intracellular protein transport, protein transport, transport                                                                                                                                                         |
| SPEN homolog, transcriptional regulator                          | Spen      | NP_062737    | 399      | 1             | nucleus                                                                                               | binding, DNA binding, nucleic acid binding, nucleotide binding, protein binding, RNA binding, single-stranded DNA binding, transcription activator activity, transcription corepressor activity, transcription factor activity, transcription repressor activity | negative regulation of transcription, DNA-dependent, Notch signaling pathway, regulation of transcription, regulation of transcription from RNA polymerase II promoter, transcription                                                     |
| prostaglandin E synthase 3 (cytosolic)                           | Ptges3    | NP_062740    | 19       | 1             | cellular_component, cytoplasm                                                                         | isomerase activity, molecular_function, prostaglandin-E synthase activity                                                                                                                                                                                        | cell proliferation, fatty acid biosynthetic process, glucocorticoid receptor signaling pathway, glycogen biosynthetic process, lipid biosynthetic process, lung saccule development, prostaglandin biosynthetic process, skin development |
| A kinase anchor protein 8                                        | Akap8     | NP_062748    | 76       | 1             | condensed chromosome, female pronucleus, intracellular, nuclear chromatin, nucleus                    | chromatin binding, DNA binding, kinase activity, metal ion binding, zinc ion binding                                                                                                                                                                             | mitotic chromosome condensation                                                                                                                                                                                                           |
| vacuolar protein sorting 29                                      | Vps29     | NP_062754    | 20       | 1             | cytoplasm, endosome, membrane                                                                         | hydrolase activity, metal ion binding, phosphoserine phosphatase activity, zinc ion binding                                                                                                                                                                      | Golgi to vacuole transport, protein transport, transport                                                                                                                                                                                  |
| peroxisomal biogenesis factor 14                                 | Pex14     | NP_062755    | 41       | 1             | membrane, peroxisomal membrane, peroxisome                                                            | not classified                                                                                                                                                                                                                                                   | protein transport, transmembrane transport, transport                                                                                                                                                                                     |
| SEC23B                                                           | Sec23b    | NP_062761    | 86       | 1             | COPII vesicle coat, endoplasmic reticulum, Golgi apparatus, membrane, perinuclear region of cytoplasm | protein binding, zinc ion binding                                                                                                                                                                                                                                | ER to Golgi vesicle-mediated transport, intracellular protein transport, protein transport, transport, vesicle-mediated transport                                                                                                         |
| acid phosphatase 6, lysophosphatidic                             | Acp6      | NP_062774    | 48       | 1             | extracellular region, mitochondrion                                                                   | acid phosphatase activity, hydrolase activity                                                                                                                                                                                                                    | biological_process                                                                                                                                                                                                                        |
| drebrin 1                                                        | Dbn1      | NP_062787    | 72       | 1             | actin cytoskeleton, cytoplasm, intracellular                                                          | actin binding                                                                                                                                                                                                                                                    | actin filament organization, cell differentiation, multicellular organismal development, nervous system development                                                                                                                       |
| membrane protein, palmitoylated 3 (MAGUK p55 subfamily member 6) | Mpp6      | NP_064323    | 61       | 1             | integral to membrane, membrane, plasma membrane                                                       | guanylate kinase activity, protein binding                                                                                                                                                                                                                       | not classified                                                                                                                                                                                                                            |
| zinc finger protein 111                                          | Zfp111    | NP_064324    | 80       | 1             | nucleus                                                                                               | metal ion binding, zinc ion binding                                                                                                                                                                                                                              | transcription                                                                                                                                                                                                                             |
| canopy 2 homolog                                                 | Cnpy2     | NP_064337    | 21       | 1             | endoplasmic reticulum                                                                                 | molecular function                                                                                                                                                                                                                                               | biological_process                                                                                                                                                                                                                        |
| 2-hydroxyacyl-CoA lyase 1                                        | Hacl1     | NP_064359    | 64       | 1             | peroxisome                                                                                            | catalytic activity, lyase activity, magnesium ion binding, metal ion binding, thiamin pyrophosphate binding, transferase activity                                                                                                                                | lipid metabolic process                                                                                                                                                                                                                   |

| Protein Name                                                | Gene Name | Accession No | Mw (kDa) | Peptide Count | GO Component                                                                                                      | GO Function                                                                                                                                                        | GO Process                                                                                                                                                                                                                                                                                                                                                                                                           |
|-------------------------------------------------------------|-----------|--------------|----------|---------------|-------------------------------------------------------------------------------------------------------------------|--------------------------------------------------------------------------------------------------------------------------------------------------------------------|----------------------------------------------------------------------------------------------------------------------------------------------------------------------------------------------------------------------------------------------------------------------------------------------------------------------------------------------------------------------------------------------------------------------|
| signal transducing adaptor family member 1                  | Stap1     | NP_064376    | 35       | 1             | cellular_component, cytoplasm                                                                                     | protein binding, SH3/SH2 adaptor activity                                                                                                                          | myeloid cell differentiation, transmembrane receptor protein tyrosine kinase signaling pathway                                                                                                                                                                                                                                                                                                                       |
| HLA-B associated transcript 2                               | Bat2      | NP_064411    | 229      | 1             | cellular_component, cytoplasm, nucleus                                                                            | molecular_function                                                                                                                                                 | biological_process                                                                                                                                                                                                                                                                                                                                                                                                   |
| calcium channel, voltage-dependent, alpha 2/delta subunit 2 | Cacna2d2  | NP_064659    | 130      | 1             | integral to membrane, membrane, voltage-gated calcium channel complex                                             | calcium channel activity, calcium ion binding, ion channel activity, metal ion binding, voltage-gated calcium channel activity, voltage-gated ion channel activity | calcium ion transport, ion transport, muscle fiber development, neuromuscular junction development, positive regulation of organ growth, regulation of multicellular organism growth, rhythmic synaptic transmission, transport                                                                                                                                                                                      |
| WD repeat domain 46                                         | Wdr46     | NP_065628    | 69       | 1             | cellular_component                                                                                                | not classified                                                                                                                                                     | not classified                                                                                                                                                                                                                                                                                                                                                                                                       |
| junctophilin 1                                              | Jph1      | NP_065629    | 72       | 1             | endoplasmic reticulum, integral to membrane, membrane, microsome, plasma membrane, sarcoplasmic reticulum, Z disc | structural constituent of muscle                                                                                                                                   | muscle organ development                                                                                                                                                                                                                                                                                                                                                                                             |
| c-K-ras2 protein                                            | Kras      | NP_067259    | 21       | 1             | intracellular, membrane, membrane fraction, plasma membrane                                                       | GTP binding, GTPase activity, nucleotide binding, protein binding                                                                                                  | actin cytoskeleton organization, negative regulation of neuron apoptosis, positive regulation of cell proliferation, positive regulation of Rac protein signal transduction, Ras protein signal transduction, regulation of long-term neuronal synaptic plasticity, regulation of synaptic transmission, GABAergic, small GTPase mediated signal transduction, striated muscle cell differentiation, visual learning |
| solute carrier family 7, member 9                           | Slc7a9    | NP_067266    | 54       | 1             | integral to membrane, membrane                                                                                    | amino acid transmembrane transporter activity                                                                                                                      | amino acid transport, transport                                                                                                                                                                                                                                                                                                                                                                                      |
| Ellis van Creveld gene homolog                              | Evc       | NP_067267    | 113      | 1             | integral to membrane, membrane                                                                                    | not classified                                                                                                                                                     | not classified                                                                                                                                                                                                                                                                                                                                                                                                       |
| junction-mediating and regulatory protein                   | Jmy       | NP_067285    | 111      | 1             | cellular_component, nucleus                                                                                       | actin binding, protein binding, transcription coactivator activity                                                                                                 | cell cycle arrest, DNA repair, induction of apoptosis, positive regulation of transcription factor activity, regulation of transcription from RNA polymerase II promoter, regulation of transcription in response to stress, response to DNA damage stimulus                                                                                                                                                         |
| piwi like homolog 1                                         | Piwi1     | NP_067286    | 99       | 1             | chromatoid body, cytoplasm, mRNA cap binding complex, polysome                                                    | mRNA binding, piRNA binding, protein binding, RNA binding, single-stranded RNA binding                                                                             | cell differentiation, gene silencing by RNA, meiosis, multicellular organismal development, piRNA metabolic process, regulation of translation, spermatid development, spermatogenesis                                                                                                                                                                                                                               |
| integrin beta 6                                             | Itgb6     | NP_067334    | 86       | 1             | integral to membrane, integrin complex, membrane                                                                  | binding, integrin binding, protein binding, receptor activity                                                                                                      | cell adhesion, cell-matrix adhesion, inflammatory response, integrin-mediated signaling pathway                                                                                                                                                                                                                                                                                                                      |

| Protein Name                                                       | Gene Name     | Accession No | Mw (kDa) | Peptide Count | GO Component                                                                                      | GO Function                                                                                                                                                                        | GO Process                                                                                                                                                                                                                                                            |
|--------------------------------------------------------------------|---------------|--------------|----------|---------------|---------------------------------------------------------------------------------------------------|------------------------------------------------------------------------------------------------------------------------------------------------------------------------------------|-----------------------------------------------------------------------------------------------------------------------------------------------------------------------------------------------------------------------------------------------------------------------|
| amiloride-sensitive cation channel 5, intestinal                   | Accn5         | NP_067345    | 57       | 1             | integral to membrane, membrane, plasma membrane                                                   | amiloride-sensitive sodium channel activity, ion channel activity, sodium channel activity, sodium ion binding                                                                     | ion transport, sodium ion transport, transport                                                                                                                                                                                                                        |
| cofactor of BRCA1                                                  | A730008L03Rik | NP_067368    | 54       | 1             | nucleus                                                                                           | not classified                                                                                                                                                                     | negative regulation of transcription, regulation of transcription, transcription                                                                                                                                                                                      |
| hypothetical protein LOC58227                                      | 9630031F12Rik | NP_067391    | 108      | 1             | not classified                                                                                    | not classified                                                                                                                                                                     | not classified                                                                                                                                                                                                                                                        |
| heat shock protein, DNAJ-like 4                                    | Dnaja4        | NP_067397    | 45       | 1             | membrane                                                                                          | heat shock protein binding, metal ion binding, unfolded protein binding, zinc ion binding                                                                                          | protein folding                                                                                                                                                                                                                                                       |
| solute carrier family 35, member B4                                | Slc35b4       | NP_067410    | 38       | 1             | Golgi apparatus, integral to membrane, membrane                                                   | not classified                                                                                                                                                                     | carbohydrate transport, transport                                                                                                                                                                                                                                     |
| aldo-keto reductase family 1, member A4 (aldehyde reductase)       | Akr1a4        | NP_067448    | 37       | 1             | apical plasma membrane, cytosol                                                                   | alcohol dehydrogenase (NADP+) activity, aldehyde reductase activity, L-glucuronate reductase activity, oxidoreductase activity                                                     | aldehyde catabolic process, biological_process, D-glucuronate catabolic process, L-ascorbic acid biosynthetic process, oxidation reduction                                                                                                                            |
| epsilon subunit of coatamer protein complex                        | Cope          | NP_067513    | 35       | 1             | COPI vesicle coat, COPI-coated vesicle, cytoplasm, cytoplasmic vesicle, Golgi apparatus, membrane | binding, protein binding, structural molecule activity                                                                                                                             | protein transport, retrograde vesicle-mediated transport, Golgi to ER, transport, vesicle-mediated transport                                                                                                                                                          |
| mitochondrial ribosomal protein S30                                | Mrps30        | NP_067531    | 50       | 1             | cellular_component, mitochondrion, ribonucleoprotein complex, ribosome                            | molecular_function, structural constituent of ribosome                                                                                                                             | biological_process, translation                                                                                                                                                                                                                                       |
| fidgetin-like 1                                                    | Figl1         | NP_068691    | 75       | 1             | not classified                                                                                    | ATP binding, hydrolase activity, magnesium ion binding, metal ion binding, nucleoside-triphosphatase activity, nucleotide binding                                                  | not classified                                                                                                                                                                                                                                                        |
| transient receptor potential cation channel, subfamily V, member 4 | Trpv4         | NP_071300    | 98       | 1             | cilium, integral to membrane, membrane, plasma membrane                                           | calcium channel activity, calcium ion binding, calmodulin binding, ion channel activity, osmosensor activity, protein binding, receptor activity                                   | calcium ion transport, hyperosmotic salinity response, ion transport, osmosensory signaling pathway, regulation of response to osmotic stress, response to osmotic stress, transport, vasopressin secretion                                                           |
| niban protein                                                      | Niban         | NP_071301    | 80       | 1             | cellular_component, cytoplasm                                                                     | molecular_function                                                                                                                                                                 | biological_process, negative regulation of protein amino acid phosphorylation, positive regulation of protein amino acid phosphorylation, positive regulation of translation, regulation of translation, response to endoplasmic reticulum stress, response to stress |
| sirtuin 2 (silent mating type information regulation 2, homolog) 2 | Sirt2         | NP_071877    | 43       | 1             | cytoplasm, cytoskeleton, microtubule                                                              | hydrolase activity, hydrolase activity, acting on carbon-nitrogen (but not peptide) bonds, in linear amides, metal ion binding, NAD binding, NAD or NADH binding, zinc ion binding | cell cycle, cell division, chromatin silencing, mitosis, protein amino acid deacetylation, regulation of transcription                                                                                                                                                |

| Protein Name                                 | Gene Name | Accession No | Mw (kDa) | Peptide Count | GO Component                                                                                                                                                                           | GO Function                                                                                                                                                                            | GO Process                                                                                                                                                                                                                                                                                                                                          |
|----------------------------------------------|-----------|--------------|----------|---------------|----------------------------------------------------------------------------------------------------------------------------------------------------------------------------------------|----------------------------------------------------------------------------------------------------------------------------------------------------------------------------------------|-----------------------------------------------------------------------------------------------------------------------------------------------------------------------------------------------------------------------------------------------------------------------------------------------------------------------------------------------------|
| equilibrative nucleoside transporter 1       | Slc29a1   | NP_075018    | 50       | 1             | integral to membrane, integral to plasma membrane, membrane                                                                                                                            | nucleoside transmembrane transporter activity                                                                                                                                          | nucleoside transport, transport                                                                                                                                                                                                                                                                                                                     |
| calsyntenin 1                                | Clstn1    | NP_075538    | 109      | 1             | cell junction, cell projection, endoplasmic reticulum, extracellular region, Golgi apparatus, integral to membrane, membrane, nucleus, plasma membrane, postsynaptic membrane, synapse | calcium ion binding, protein binding                                                                                                                                                   | cell adhesion, cellular calcium ion homeostasis, homophilic cell adhesion, synaptic transmission                                                                                                                                                                                                                                                    |
| CNDP dipeptidase 2                           | Cndp2     | NP_075638    | 53       | 1             | cytosol                                                                                                                                                                                | carboxypeptidase activity, dipeptidase activity, hydrolase activity, metal ion binding, metallopeptidase activity, peptidase activity, protein dimerization activity, zinc ion binding | proteolysis                                                                                                                                                                                                                                                                                                                                         |
| ETHE1 protein                                | Eth1      | NP_075643    | 28       | 1             | cytoplasm, mitochondrion, nucleus                                                                                                                                                      | hydrolase activity, metal ion binding, zinc ion binding                                                                                                                                | not classified                                                                                                                                                                                                                                                                                                                                      |
| Nit protein 2                                | Nit2      | NP_075664    | 31       | 1             | cytoplasm, mitochondrion                                                                                                                                                               | hydrolase activity, hydrolase activity, acting on carbon-nitrogen (but not peptide) bonds                                                                                              | nitrogen compound metabolic process                                                                                                                                                                                                                                                                                                                 |
| protein phosphatase-1 regulatory subunit 7   | Ppp1r7    | NP_075689    | 41       | 1             | nucleus                                                                                                                                                                                | protein binding                                                                                                                                                                        | not classified                                                                                                                                                                                                                                                                                                                                      |
| chaperone, ABC1 activity of bc1 complex like | Cabc1     | NP_075830    | 72       | 1             | mitochondrion                                                                                                                                                                          | ATP binding, kinase activity, nucleotide binding, transferase activity                                                                                                                 | not classified                                                                                                                                                                                                                                                                                                                                      |
| myosin light chain, regulatory B             | Mylc2b    | NP_075891    | 20       | 1             | apical part of cell, myosin complex                                                                                                                                                    | calcium ion binding, motor activity                                                                                                                                                    | not classified                                                                                                                                                                                                                                                                                                                                      |
| syncoilin                                    | Sync      | NP_075974    | 54       | 1             | cytoplasm, cytosol, intermediate filament, sarcolemma, synapse, Z disc                                                                                                                 | protein binding, structural molecule activity                                                                                                                                          | intermediate filament-based process                                                                                                                                                                                                                                                                                                                 |
| myo-inositol 1-phosphate synthase A1         | Isyna1    | NP_076116    | 61       | 1             | cytoplasm                                                                                                                                                                              | binding, catalytic activity, inositol-3-phosphate synthase activity, isomerase activity                                                                                                | inositol biosynthetic process, metabolic process, phospholipid biosynthetic process                                                                                                                                                                                                                                                                 |
| RAB27A protein                               | Rab27a    | NP_076124    | 25       | 1             | Golgi apparatus, intracellular, membrane, secretory granule                                                                                                                            | GTP binding, GTPase activity, myosin V binding, nucleotide binding                                                                                                                     | blood coagulation, cytotoxic T cell degranulation, melanocyte differentiation, melanosome localization, melanosome transport, natural killer cell degranulation, pigment granule localization, pigment granule transport, pigmentation, protein targeting, protein transport, small GTPase mediated signal transduction, vesicle-mediated transport |
| alcohol dehydrogenase PAN2                   | Rdh14     | NP_076186    | 36       | 1             | not classified                                                                                                                                                                         | binding, catalytic activity, oxidoreductase activity                                                                                                                                   | metabolic process, oxidation reduction                                                                                                                                                                                                                                                                                                              |
| M-phase phosphoprotein, mpp8                 | Mphosph8  | NP_076262    | 96       | 1             | nucleus                                                                                                                                                                                | not classified                                                                                                                                                                         | not classified                                                                                                                                                                                                                                                                                                                                      |
| ryanodine receptor 2, cardiac                | Ryr2      | NP_076357    | 565      | 1             | integral to membrane, sarcoplasmic reticulum membrane, Z disc                                                                                                                          | ion channel activity, protein binding, receptor activity, ryanodine-sensitive calcium-release channel activity                                                                         | calcium ion transport, ion transport, response to caffeine, transport                                                                                                                                                                                                                                                                               |

| Protein Name                                                 | Gene Name | Accession No | Mw (kDa) | Peptide Count | GO Component                                                                                    | GO Function                                                                                                                                                                    | GO Process                                                                                                                                                                                    |
|--------------------------------------------------------------|-----------|--------------|----------|---------------|-------------------------------------------------------------------------------------------------|--------------------------------------------------------------------------------------------------------------------------------------------------------------------------------|-----------------------------------------------------------------------------------------------------------------------------------------------------------------------------------------------|
| U2 small nuclear ribonucleoprotein auxiliary factor (U2AF) 1 | U2af1     | NP_077149    | 28       | 1             | nucleus, ribonucleoprotein complex, spliceosomal complex                                        | metal ion binding, nucleic acid binding, nucleotide binding, RNA binding, RS domain binding, zinc ion binding                                                                  | mRNA processing, RNA splicing                                                                                                                                                                 |
| Der1-like domain family, member 1                            | Der1      | NP_077169    | 29       | 1             | endoplasmic reticulum, integral to membrane, membrane                                           | not classified                                                                                                                                                                 | protein transport, response to unfolded protein, transport                                                                                                                                    |
| LIM only protein HLP                                         | Crip2     | NP_077185    | 23       | 1             | cellular_component                                                                              | metal ion binding, molecular_function, zinc ion binding                                                                                                                        | hemopoiesis, positive regulation of cell proliferation                                                                                                                                        |
| quinoid dihydropteridine reductase                           | Qdpr      | NP_077198    | 26       | 1             | not classified                                                                                  | 6,7-dihydropteridine reductase activity, binding, catalytic activity, oxidoreductase activity                                                                                  | metabolic process, oxidation reduction, tetrahydrobiopterin biosynthetic process                                                                                                              |
| cytochrome P450 CYP4F18                                      | Cyp4f18   | NP_077764    | 60       | 1             | endoplasmic reticulum, integral to membrane, membrane, microsome                                | electron carrier activity, heme binding, iron ion binding, leukotriene-B4 20-monooxygenase activity, metal ion binding, monooxygenase activity, oxidoreductase activity        | oxidation reduction                                                                                                                                                                           |
| leucine zipper protein 1                                     | Luzp1     | NP_077772    | 119      | 1             | nucleus                                                                                         | molecular_function                                                                                                                                                             | biological_process                                                                                                                                                                            |
| RAB21, member RAS oncogene family                            | Rab21     | NP_077774    | 24       | 1             | cytoplasmic vesicle, endoplasmic reticulum, endosome, Golgi apparatus, membrane                 | GTP binding, nucleotide binding, protein binding                                                                                                                               | protein transport, small GTPase mediated signal transduction, transport                                                                                                                       |
| radial spoke head 1 homolog                                  | Rsph1     | NP_079566    | 34       | 1             | cytoplasm                                                                                       | not classified                                                                                                                                                                 | meiosis                                                                                                                                                                                       |
| required for meiotic nuclear division 1 homolog              | Rmnd1     | NP_079619    | 52       | 1             | cellular_component                                                                              | molecular_function                                                                                                                                                             | biological_process                                                                                                                                                                            |
| required for meiotic nuclear division 5 homolog B            | Rmnd5b    | NP_079622    | 44       | 1             | not classified                                                                                  | not classified                                                                                                                                                                 | not classified                                                                                                                                                                                |
| ubiquitin-conjugating enzyme E2D 3 (UBC4/5 homolog, yeast)   | Ube2d3    | NP_079632    | 17       | 1             | not classified                                                                                  | ATP binding, ligase activity, nucleotide binding, small conjugating protein ligase activity, ubiquitin-protein ligase activity                                                 | modification-dependent protein catabolic process, post-translational protein modification, proteasomal ubiquitin-dependent protein catabolic process, regulation of protein metabolic process |
| 6-phosphogluconolactonase                                    | Pgls      | NP_079672    | 27       | 1             | not classified                                                                                  | 6-phosphogluconolactonase activity, hydrolase activity                                                                                                                         | carbohydrate metabolic process, pentose-phosphate shunt                                                                                                                                       |
| pyrroline-5-carboxylate reductase-like                       | Pycr1     | NP_079688    | 29       | 1             | cellular_component                                                                              | binding, catalytic activity, cytidine deaminase activity, identical protein binding, oxidoreductase activity, protein binding, pyrroline-5-carboxylate reductase activity      | cellular amino acid biosynthetic process, cytidine deamination, metabolic process, oxidation reduction, proline biosynthetic process                                                          |
| ribosomal protein L7-like 1                                  | Rpl71     | NP_079709    | 29       | 1             | cellular_component, intracellular, large ribosomal subunit, ribonucleoprotein complex, ribosome | molecular_function, structural constituent of ribosome, transcription regulator activity                                                                                       | biological_process, translation                                                                                                                                                               |
| transmembrane protein 126A                                   | Tmem126a  | NP_079736    | 22       | 1             | cellular_component, integral to membrane, membrane                                              | molecular_function                                                                                                                                                             | biological_process                                                                                                                                                                            |
| ATPase, H <sup>+</sup> transporting, lysosomal V1 subunit C1 | Atp6v1c1  | NP_079770    | 44       | 1             | plasma membrane, proton-transporting V-type ATPase, V1 domain                                   | hydrogen-exporting ATPase activity, phosphorylative mechanism, hydrolase activity, acting on acid anhydrides, catalyzing transmembrane movement of substances, protein binding | ATP synthesis coupled proton transport, ion transport, proton transport, transport                                                                                                            |



| Protein Name                                                                                         | Gene Name      | Accession No | Mw (kDa) | Peptide Count | GO Component                                                               | GO Function                                                                                                                                                                                                                        | GO Process                                                                                 |
|------------------------------------------------------------------------------------------------------|----------------|--------------|----------|---------------|----------------------------------------------------------------------------|------------------------------------------------------------------------------------------------------------------------------------------------------------------------------------------------------------------------------------|--------------------------------------------------------------------------------------------|
| mitochondrial ribosomal protein L37                                                                  | Mrpl37         | NP_079776    | 48       | 1             | mitochondrial ribosome, mitochondrion, ribonucleoprotein complex, ribosome | not classified                                                                                                                                                                                                                     | not classified                                                                             |
| ERGIC and golgi 3                                                                                    | Ergic3         | NP_079792    | 43       | 1             | endoplasmic reticulum, Golgi apparatus, integral to membrane, membrane     | not classified                                                                                                                                                                                                                     | transport, vesicle-mediated transport                                                      |
| hypothetical protein LOC66508                                                                        | 2400001E08 Rik | NP_079881    | 18       | 1             | not classified                                                             | not classified                                                                                                                                                                                                                     | not classified                                                                             |
| signal recognition particle 72                                                                       | Srp72          | NP_079967    | 75       | 1             | nucleolus, signal recognition particle, endoplasmic reticulum targeting    | molecular_function                                                                                                                                                                                                                 | SRP-dependent cotranslational protein targeting to membrane                                |
| trafficking protein particle complex 5                                                               | Trappc5        | NP_079977    | 21       | 1             | endoplasmic reticulum, Golgi apparatus, TRAPP complex                      | protein binding                                                                                                                                                                                                                    | transport, vesicle-mediated transport                                                      |
| cysteine-rich perinuclear theca 5                                                                    | Cypt6          | NP_080014    | 20       | 1             | not classified                                                             | not classified                                                                                                                                                                                                                     | not classified                                                                             |
| peroxisomal lon protease                                                                             | Lonp2          | NP_080103    | 95       | 1             | cytoplasm, nucleus, peroxisomal matrix, peroxisome                         | ATP binding, ATP-dependent peptidase activity, hydrolase activity, nucleoside-triphosphatase activity, nucleotide binding, peptidase activity, protein binding, serine-type endopeptidase activity, serine-type peptidase activity | peroxisome organization, proteolysis                                                       |
| mannose phosphate isomerase                                                                          | Mpi            | NP_080113    | 47       | 1             | cytoplasm                                                                  | isomerase activity, mannose-6-phosphate isomerase activity, metal ion binding, zinc ion binding                                                                                                                                    | carbohydrate metabolic process, mannose metabolic process                                  |
| vacuolar protein sorting 28                                                                          | Vps28          | NP_080118    | 25       | 1             | cytosol, endosome, membrane, plasma membrane                               | protein binding                                                                                                                                                                                                                    | protein transport, transport                                                               |
| acyl-Coenzyme A dehydrogenase family, member 8                                                       | Acad8          | NP_080138    | 45       | 1             | mitochondrion                                                              | acyl-CoA dehydrogenase activity, electron carrier activity, FAD binding, oxidoreductase activity, oxidoreductase activity, acting on the CH-CH group of donors                                                                     | branched chain family amino acid catabolic process, metabolic process, oxidation reduction |
| mitochondrial ribosomal protein S18B                                                                 | Mrps18b        | NP_080154    | 29       | 1             | intracellular, mitochondrion, ribonucleoprotein complex, ribosome          | structural constituent of ribosome                                                                                                                                                                                                 | translation                                                                                |
| DEK oncogene (DNA binding)                                                                           | Dek            | NP_080176    | 43       | 1             | cellular_component, nucleus                                                | DNA binding, molecular_function, nucleic acid binding                                                                                                                                                                              | response to protein stimulus                                                               |
| myc induced nuclear antigen                                                                          | Mina           | NP_080186    | 54       | 1             | nucleolus, nucleus                                                         | not classified                                                                                                                                                                                                                     | regulation of cell proliferation, ribosome biogenesis                                      |
| phosphoribosylaminoimidazole carboxylase, phosphoribosylaminoimidazole succinocarboxamide synthetase | Paics          | NP_080215    | 47       | 1             | not classified                                                             | ATP binding, carboxylase activity, catalytic activity, ligase activity, lyase activity, nucleotide binding, phosphoribosylaminoimidazole carboxylase activity, phosphoribosylaminoimidazole succinocarboxamide synthase activity   | 'de novo' IMP biosynthetic process, purine nucleotide biosynthetic process                 |
| hypothetical protein LOC67105                                                                        | 1700034H14 Rik | NP_080245    | 28       | 1             | integral to membrane, membrane, mitochondrion                              | not classified                                                                                                                                                                                                                     | protein transport, transmembrane transport, transport                                      |
| SVH protein                                                                                          | Armc10         | NP_080310    | 33       | 1             | endoplasmic reticulum, integral to membrane, membrane                      | binding                                                                                                                                                                                                                            | regulation of growth                                                                       |
| proline racemase-like                                                                                | 2810055F11 Rik | NP_080314    | 38       | 1             | not classified                                                             | isomerase activity, proline racemase activity                                                                                                                                                                                      | not classified                                                                             |

| Protein Name                                                                                | Gene Name      | Accession No | Mw (kDa) | Peptide Count | GO Component                                                           | GO Function                                                                                                                                                   | GO Process                                                                                                                                   |
|---------------------------------------------------------------------------------------------|----------------|--------------|----------|---------------|------------------------------------------------------------------------|---------------------------------------------------------------------------------------------------------------------------------------------------------------|----------------------------------------------------------------------------------------------------------------------------------------------|
| serum response factor binding protein 1                                                     | Srfbp1         | NP_080316    | 49       | 1             | cytoplasm, nucleus                                                     | protein binding                                                                                                                                               | biological_process, regulation of transcription, transcription                                                                               |
| CAP, adenylate cyclase-associated protein, 2                                                | Cap2           | NP_080332    | 53       | 1             | membrane, plasma membrane                                              | actin binding, binding                                                                                                                                        | cytoskeleton organization                                                                                                                    |
| inhibitor of kappa light polypeptide enhancer in B-cells, kinase complex-associated protein | Ikbpap         | NP_080355    | 150      | 1             | cellular_component, cytoplasm, nucleus                                 | protein binding                                                                                                                                               | biological_process, regulation of transcription, transcription                                                                               |
| MAWD binding protein homolog 2                                                              | 3110049J23 Rik | NP_080361    | 32       | 1             | not classified                                                         | catalytic activity, isomerase activity                                                                                                                        | biosynthetic process                                                                                                                         |
| disevelled associated activator of morphogenesis 1                                          | Daam1          | NP_080378    | 123      | 1             | cytoplasm                                                              | actin binding, Rho GTPase binding                                                                                                                             | actin cytoskeleton organization, cellular component organization                                                                             |
| eukaryotic translation initiation factor 2, subunit 1 alpha                                 | Eif2s1         | NP_080390    | 36       | 1             | cytoplasm, eukaryotic translation initiation factor 2 complex, nucleus | protein binding, RNA binding, translation initiation factor activity                                                                                          | protein amino acid autophosphorylation, regulation of translation, regulation of translational initiation in response to stress, translation |
| high mobility group nucleosomal binding domain 3 isoform HMGN3a                             | Hmgn3          | NP_080398    | 11       | 1             | chromatin, nucleus                                                     | chromatin binding, DNA binding                                                                                                                                | biological_process                                                                                                                           |
| hypothetical protein LOC67392                                                               | 4833420G17 Rik | NP_080403    | 72       | 1             | not classified                                                         | not classified                                                                                                                                                | not classified                                                                                                                               |
| splicing factor 3a, subunit 1                                                               | Sf3a1          | NP_080451    | 89       | 1             | nucleus, spliceosomal complex                                          | RNA binding                                                                                                                                                   | mRNA processing, RNA processing, RNA splicing                                                                                                |
| phosducin-like                                                                              | Pdcl           | NP_080452    | 34       | 1             | not classified                                                         | not classified                                                                                                                                                | response to stimulus, visual perception                                                                                                      |
| 5-aminoimidazole-4-carboxamide ribonucleotide formyltransferase/IMP cyclohydrolase          | Atic           | NP_080471    | 64       | 1             | not classified                                                         | catalytic activity, hydrolase activity, IMP cyclohydrolase activity, phosphoribosylaminoimidazolecarboxamide formyltransferase activity, transferase activity | IMP biosynthetic process, purine nucleotide biosynthetic process                                                                             |
| cell division cycle and apoptosis regulator 1                                               | Ccar1          | NP_080477    | 132      | 1             | cytoplasm, nuclear envelope lumen                                      | molecular_function, nucleic acid binding                                                                                                                      | apoptosis, cell cycle, positive regulation of apoptosis, regulation of transcription, transcription                                          |
| ring finger protein 151                                                                     | Rnf151         | NP_080481    | 27       | 1             | nucleus                                                                | metal ion binding, protein binding, zinc ion binding                                                                                                          | not classified                                                                                                                               |
| 1-acylglycerol-3-phosphate O-acyltransferase 2                                              | Agpat2         | NP_080488    | 31       | 1             | endoplasmic reticulum, integral to membrane, membrane                  | 1-acylglycerol-3-phosphate O-acyltransferase activity, acyltransferase activity, transferase activity                                                         | metabolic process, phospholipid biosynthetic process                                                                                         |
| PTPRF interacting protein, binding protein 1 (liprin beta 1)                                | Ppfbp1         | NP_080497    | 109      | 1             | cellular_component                                                     | DNA binding, integrase activity, molecular_function                                                                                                           | biological_process, DNA integration                                                                                                          |
| mitochondrial ribosomal protein L49                                                         | Mrpl49         | NP_080522    | 19       | 1             | intracellular, mitochondrion, ribonucleoprotein complex, ribosome      | structural constituent of ribosome                                                                                                                            | translation                                                                                                                                  |
| TRM112-like                                                                                 | 0610038D11 Rik | NP_080582    | 14       | 1             | protein complex                                                        | protein binding, protein methyltransferase activity                                                                                                           | not classified                                                                                                                               |
| RER1 homolog                                                                                | Rer1           | NP_080671    | 23       | 1             | Golgi apparatus, integral to membrane, membrane                        | not classified                                                                                                                                                | not classified                                                                                                                               |
| RNA (guanine-7-) methyltransferase                                                          | Rnmt           | NP_080716    | 53       | 1             | mRNA cap binding complex, nucleus                                      | methyltransferase activity, mRNA (guanine-7-)-methyltransferase activity, protein binding, RNA binding, transferase activity                                  | mRNA capping, mRNA processing                                                                                                                |
| SGT1, suppressor of G2 allele of SKP1                                                       | Sugt1          | NP_080750    | 38       | 1             | not classified                                                         | binding                                                                                                                                                       | modification-dependent protein catabolic process                                                                                             |
| centrosome and spindle pole associated protein 1                                            | Cspp1          | NP_080769    | 137      | 1             | not classified                                                         | not classified                                                                                                                                                | not classified                                                                                                                               |

| Protein Name                                                           | Gene Name      | Accession No | Mw (kDa) | Peptide Count | GO Component                                                                                                                    | GO Function                                                                                                                                | GO Process                                                                                                                                                                                                                                         |
|------------------------------------------------------------------------|----------------|--------------|----------|---------------|---------------------------------------------------------------------------------------------------------------------------------|--------------------------------------------------------------------------------------------------------------------------------------------|----------------------------------------------------------------------------------------------------------------------------------------------------------------------------------------------------------------------------------------------------|
| phosphopantothencycysteine synthetase                                  | Ppcs           | NP_080770    | 34       | 1             | not classified                                                                                                                  | ligase activity, phosphopantothenate--cysteine ligase activity                                                                             | not classified                                                                                                                                                                                                                                     |
| mitochondrial ribosomal protein S11                                    | Mrps11         | NP_080774    | 20       | 1             | intracellular, mitochondrion, ribonucleoprotein complex, ribosome                                                               | structural constituent of ribosome                                                                                                         | translation                                                                                                                                                                                                                                        |
| ATP synthase, H+ transporting, mitochondrial F0 complex, subunit s     | Atp5s          | NP_080812    | 23       | 1             | membrane, mitochondrial inner membrane, mitochondrion, proton-transporting ATP synthase complex, coupling factor F(o)           | not classified                                                                                                                             | ATP biosynthetic process, ion transport, proton transport, transport                                                                                                                                                                               |
| nucleolar RNA helicase homolog                                         | Ddx56          | NP_080814    | 61       | 1             | nucleolus, nucleus                                                                                                              | ATP binding, ATP-dependent helicase activity, helicase activity, hydrolase activity, nucleic acid binding, nucleotide binding, RNA binding | ribosome biogenesis, rRNA processing                                                                                                                                                                                                               |
| proteasome 26S non-ATPase subunit 8                                    | Psm8           | NP_080821    | 40       | 1             | proteasome complex, proteasome regulatory particle                                                                              | not classified                                                                                                                             | proteolysis                                                                                                                                                                                                                                        |
| hypothetical protein LOC68073                                          | A930016P21 Rik | NP_080822    | 27       | 1             | integral to membrane, membrane                                                                                                  | not classified                                                                                                                             | not classified                                                                                                                                                                                                                                     |
| glycine cleavage system protein H (aminomethyl carrier)                | Gcsh           | NP_080848    | 19       | 1             | glycine cleavage complex, mitochondrion                                                                                         | lipoic acid binding                                                                                                                        | glycine catabolic process                                                                                                                                                                                                                          |
| nucleolar protein family A, member 1                                   | Nola1          | NP_080854    | 23       | 1             | dense fibrillar component, nucleus, ribonucleoprotein complex, small nucleolar ribonucleoprotein complex                        | RNA binding, rRNA binding, snoRNA binding                                                                                                  | biological_process, ribosome biogenesis, rRNA processing                                                                                                                                                                                           |
| syntaxin 19                                                            | Stx19          | NP_080864    | 34       | 1             | membrane                                                                                                                        | SNAP receptor activity                                                                                                                     | intracellular protein transport                                                                                                                                                                                                                    |
| coiled-coil domain containing 34                                       | Ccdc34         | NP_080889    | 23       | 1             | not classified                                                                                                                  | not classified                                                                                                                             | not classified                                                                                                                                                                                                                                     |
| family with sequence similarity 98, member B                           | 2610510H03 Rik | NP_080896    | 45       | 1             | not classified                                                                                                                  | not classified                                                                                                                             | not classified                                                                                                                                                                                                                                     |
| hypothetical protein LOC68241                                          | 9530058B02 Rik | NP_080909    | 18       | 1             | cellular_component                                                                                                              | protein binding                                                                                                                            | biological_process                                                                                                                                                                                                                                 |
| solute carrier family 25 (mitochondrial carrier, glutamate), member 22 | Slc25a22       | NP_080922    | 35       | 1             | integral to membrane, membrane, mitochondrial inner membrane, mitochondrion                                                     | binding, symporter activity, transporter activity                                                                                          | transport                                                                                                                                                                                                                                          |
| replication protein A1                                                 | Rpa1           | NP_080929    | 69       | 1             | condensed chromosome, condensed nuclear chromosome, DNA replication factor A complex, male germ cell nucleus, nucleus, PML body | chromatin binding, DNA binding, metal ion binding, nucleic acid binding, zinc ion binding                                                  | chromosome organization, DNA replication, double-strand break repair via homologous recombination, hemopoiesis, homeostasis of number of cells within a tissue, in utero embryonic development, meiosis, positive regulation of cell proliferation |
| mitochondrial ribosomal protein L14                                    | Mrpl14         | NP_081008    | 16       | 1             | intracellular, mitochondrion, ribonucleoprotein complex, ribosome                                                               | structural constituent of ribosome                                                                                                         | translation                                                                                                                                                                                                                                        |
| hypothetical protein LOC68544                                          | 2310036O22 Rik | NP_081036    | 18       | 1             | not classified                                                                                                                  | not classified                                                                                                                             | not classified                                                                                                                                                                                                                                     |
| collagen type VI alpha 4                                               | 1110001D15 Rik | NP_081039    | 160      | 1             | extracellular region, proteinaceous extracellular matrix                                                                        | protein binding                                                                                                                            | cell adhesion                                                                                                                                                                                                                                      |
| vacuolar protein sorting 25                                            | Vps25          | NP_081052    | 21       | 1             | cytoplasm, mitochondrion, nucleus                                                                                               | not classified                                                                                                                             | protein transport, regulation of transcription, transcription, transport                                                                                                                                                                           |
| ADP-ribosylation factor-like 8A                                        | Arl8a          | NP_081099    | 21       | 1             | cellular_component, endosome, intracellular, lysosome, membrane                                                                 | GTP binding, molecular_function, nucleotide binding                                                                                        | biological_process, small GTPase mediated signal transduction                                                                                                                                                                                      |

| Protein Name                                            | Gene Name      | Accession No | Mw (kDa) | Peptide Count | GO Component                                                                                                      | GO Function                                                                                                                                                                           | GO Process                                                                                                |
|---------------------------------------------------------|----------------|--------------|----------|---------------|-------------------------------------------------------------------------------------------------------------------|---------------------------------------------------------------------------------------------------------------------------------------------------------------------------------------|-----------------------------------------------------------------------------------------------------------|
| ras responsive element binding protein 1 isoform 2      | Rreb1          | NP_081106    | 140      | 1             | intracellular, nucleus                                                                                            | DNA binding, metal ion binding, nucleic acid binding, zinc ion binding                                                                                                                | regulation of transcription, transcription                                                                |
| calcium binding protein 39-like                         | Cab39l         | NP_081184    | 39       | 1             | cellular_component                                                                                                | molecular_function                                                                                                                                                                    | biological_process                                                                                        |
| mannosidase, beta A, lysosomal-like                     | Manbal         | NP_081244    | 9        | 1             | integral to membrane, membrane                                                                                    | not classified                                                                                                                                                                        | not classified                                                                                            |
| GTP binding protein 4                                   | Gtpbp4         | NP_081276    | 74       | 1             | nucleus                                                                                                           | GTP binding, nucleotide binding                                                                                                                                                       | ribosome biogenesis                                                                                       |
| RWD domain containing 2A                                | Rwdd2a         | NP_081376    | 34       | 1             | not classified                                                                                                    | not classified                                                                                                                                                                        | not classified                                                                                            |
| differentially expressed in FDCP 6                      | Def6           | NP_081461    | 73       | 1             | cytoplasm, membrane, nucleus, plasma membrane                                                                     | protein binding                                                                                                                                                                       | not classified                                                                                            |
| castor homolog 1, zinc finger                           | Casz1          | NP_081471    | 126      | 1             | intracellular, nucleus                                                                                            | DNA binding, metal ion binding, zinc ion binding                                                                                                                                      | regulation of transcription, transcription                                                                |
| forty-two-three domain containing 1                     | Fytd1          | NP_081502    | 36       | 1             | not classified                                                                                                    | not classified                                                                                                                                                                        | not classified                                                                                            |
| hypothetical protein LOC69894                           | 2010107G23 Rik | NP_081527    | 13       | 1             | cellular_component, integral to membrane, membrane                                                                | protein binding                                                                                                                                                                       | biological_process                                                                                        |
| mannosidase, beta A, lysosomal                          | Manba          | NP_081564    | 101      | 1             | lysosome                                                                                                          | beta-mannosidase activity, catalytic activity, cation binding, hydrolase activity, hydrolase activity, acting on glycosyl bonds, hydrolase activity, hydrolyzing O-glycosyl compounds | carbohydrate metabolic process, glycoprotein catabolic process, metabolic process                         |
| membrane-associated ring finger (C3HC4) 5               | 5-Mar          | NP_081590    | 31       | 1             | integral to membrane, membrane, mitochondrial outer membrane, mitochondrion                                       | ligase activity, metal ion binding, zinc ion binding                                                                                                                                  | modification-dependent protein catabolic process                                                          |
| PRP31                                                   | Prpf31         | NP_081604    | 55       | 1             | Cajal body, nuclear speck, nucleus, ribonucleoprotein complex, spliceosomal complex, U4/U6 x U5 tri-snRNP complex | protein binding, ribonucleoprotein binding, RNA binding                                                                                                                               | assembly of spliceosomal tri-snRNP, mRNA processing, nuclear mRNA splicing, via spliceosome, RNA splicing |
| hypothetical protein LOC70363                           | 1700010C24 Rik | NP_081677    | 36       | 1             | not classified                                                                                                    | not classified                                                                                                                                                                        | not classified                                                                                            |
| ATPase, H+ transporting, lysosomal accessory protein 2  | Atp6ap2        | NP_081715    | 39       | 1             | cellular_component, integral to membrane, membrane                                                                | molecular_function, receptor activity                                                                                                                                                 | biological_process                                                                                        |
| doublecortin-like kinase 2                              | Dclk2          | NP_081815    | 83       | 1             | not classified                                                                                                    | ATP binding, kinase activity, nucleotide binding, protein kinase activity, protein serine/threonine kinase activity, transferase activity                                             | intracellular signaling cascade, protein amino acid phosphorylation                                       |
| keratin 34                                              | Krt34          | NP_081839    | 45       | 1             | intermediate filament                                                                                             | structural molecule activity                                                                                                                                                          | not classified                                                                                            |
| mesoderm induction early response 1 isoform a           | Mier1          | NP_081972    | 60       | 1             | nucleus                                                                                                           | DNA binding                                                                                                                                                                           | regulation of transcription, transcription                                                                |
| gamma-glutamyltransferase 6                             | Ggt6           | NP_082095    | 51       | 1             | integral to membrane, membrane                                                                                    | acyltransferase activity, gamma-glutamyltransferase activity, transferase activity                                                                                                    | glutathione biosynthetic process                                                                          |
| interferon induced with helicase C domain 1             | Ifih1          | NP_082111    | 116      | 1             | cytoplasm, intracellular, nucleus                                                                                 | ATP binding, DNA binding, helicase activity, hydrolase activity, nucleic acid binding, nucleotide binding, protein binding, RNA binding                                               | immune response, innate immune response, regulation of apoptosis, response to virus                       |
| retinoic acid receptor responder (tazarotene induced) 2 | Rarres2        | NP_082128    | 18       | 1             | extracellular region                                                                                              | not classified                                                                                                                                                                        | brown fat cell differentiation, defense response                                                          |
| zinc finger protein 297B isoform a                      | Zbtb43         | NP_082223    | 57       | 1             | intracellular, nucleus                                                                                            | DNA binding, metal ion binding, nucleic acid binding, protein binding, zinc ion binding                                                                                               | regulation of transcription, transcription                                                                |

| Protein Name                                                          | Gene Name | Accession No | Mw (kDa) | Peptide Count | GO Component                                                                                                            | GO Function                                                                                                                                                                                                   | GO Process                                                                                                                                                                       |
|-----------------------------------------------------------------------|-----------|--------------|----------|---------------|-------------------------------------------------------------------------------------------------------------------------|---------------------------------------------------------------------------------------------------------------------------------------------------------------------------------------------------------------|----------------------------------------------------------------------------------------------------------------------------------------------------------------------------------|
| dihydrouridine synthase 4-like                                        | Dus4l     | NP_082278    | 37       | 1             | not classified                                                                                                          | catalytic activity, FAD binding, oxidoreductase activity, tRNA dihydrouridine synthase activity                                                                                                               | metabolic process, oxidation reduction, tRNA processing                                                                                                                          |
| NFKB inhibitor interacting Ras-like protein 2                         | Nkiras2   | NP_082300    | 21       | 1             | cytoplasm, intracellular                                                                                                | GTP binding, nucleotide binding                                                                                                                                                                               | small GTPase mediated signal transduction                                                                                                                                        |
| sulfatase 2                                                           | Sulf2     | NP_082348    | 100      | 1             | cell surface, endoplasmic reticulum, extracellular space, Golgi apparatus                                               | arylsulfatase activity, calcium ion binding, catalytic activity, hydrolase activity, metal ion binding, N-acetylglucosamine-6-sulfatase activity, sulfuric ester hydrolase activity                           | metabolic process, sulfur metabolic process                                                                                                                                      |
| coiled-coil domain containing 123                                     | Ccdc123   | NP_082396    | 90       | 1             | cellular_component, mitochondrion                                                                                       | protein binding                                                                                                                                                                                               | biological_process                                                                                                                                                               |
| DEAH (Asp-Glu-Ala-His) box polypeptide 36                             | Dhx36     | NP_082412    | 114      | 1             | nucleus                                                                                                                 | ATP binding, ATP-dependent helicase activity, helicase activity, hydrolase activity, nucleic acid binding, nucleotide binding                                                                                 | not classified                                                                                                                                                                   |
| splicing factor, arginine/serine-rich 2, interacting protein          | Sfrs2ip   | NP_082424    | 162      | 1             | not classified                                                                                                          | metal ion binding, zinc ion binding                                                                                                                                                                           | not classified                                                                                                                                                                   |
| cytidine deaminase                                                    | Cda       | NP_082452    | 16       | 1             | not classified                                                                                                          | cytidine deaminase activity, hydrolase activity, identical protein binding, metal ion binding, zinc ion binding                                                                                               | cytidine metabolic process                                                                                                                                                       |
| SET domain containing 3                                               | Setd3     | NP_082538    | 67       | 1             | not classified                                                                                                          | not classified                                                                                                                                                                                                | not classified                                                                                                                                                                   |
| phosphoglycerate mutase family member 5                               | Pgam5     | NP_082549    | 32       | 1             | cytoplasm, nucleus                                                                                                      | catalytic activity                                                                                                                                                                                            | metabolic process                                                                                                                                                                |
| PDZ domain containing 11                                              | Pdzd11    | NP_082579    | 16       | 1             | not classified                                                                                                          | protein binding                                                                                                                                                                                               | not classified                                                                                                                                                                   |
| proline-rich coiled-coil 1                                            | Prrc1     | NP_082723    | 46       | 1             | cellular_component, Golgi apparatus                                                                                     | identical protein binding                                                                                                                                                                                     | biological_process                                                                                                                                                               |
| coiled-coil domain containing 103                                     | Ccdc103   | NP_082768    | 27       | 1             | not classified                                                                                                          | not classified                                                                                                                                                                                                | not classified                                                                                                                                                                   |
| mannosidase, alpha, class 2C, member 1                                | Man2c1    | NP_082912    | 116      | 1             | not classified                                                                                                          | alpha-mannosidase activity, hydrolase activity, hydrolase activity, acting on glycosyl bonds, hydrolase activity, hydrolyzing O-glycosyl compounds, mannosidase activity, metal ion binding, zinc ion binding | carbohydrate metabolic process, mannose metabolic process, metabolic process                                                                                                     |
| golgi associated, gamma adaptin ear containing, ARF binding protein 2 | Gga2      | NP_083034    | 66       | 1             | clathrin adaptor complex, endosome, Golgi apparatus, Golgi apparatus part, intracellular, membrane, trans-Golgi network | ADP-ribosylation factor binding, protein binding                                                                                                                                                              | biological_process, intracellular protein transport, protein transport, transport, vesicle-mediated transport                                                                    |
| clathrin, light polypeptide (Lcb)                                     | Cltb      | NP_083146    | 23       | 1             | clathrin coat of coated pit, clathrin coat of trans-Golgi network vesicle, coated pit, cytoplasmic vesicle, membrane    | calcium ion binding, protein binding, structural molecule activity                                                                                                                                            | biological_process, intracellular protein transport, vesicle-mediated transport                                                                                                  |
| scavenger receptor class A, member 5                                  | Scara5    | NP_083179    | 54       | 1             | cell surface, integral to membrane, integral to plasma membrane, membrane, plasma membrane                              | ferritin receptor activity, iron ion binding, protein binding, receptor activity, scavenger receptor activity                                                                                                 | cellular iron ion homeostasis, cellular response to heat, endocytosis, ion transport, iron ion transmembrane transport, iron ion transport, protein homotrimerization, transport |
| leucine rich repeat and coiled-coil domain containing 1               | Lrrcc1    | NP_083191    | 115      | 1             | not classified                                                                                                          | protein binding                                                                                                                                                                                               | cell cycle, cell division, mitosis                                                                                                                                               |

| Protein Name                                                                                              | Gene Name         | Accession No | Mw (kDa) | Peptide Count | GO Component                                                                    | GO Function                                                                                                                                                                                                                                                                                                                                                        | GO Process                                                                                                                 |
|-----------------------------------------------------------------------------------------------------------|-------------------|--------------|----------|---------------|---------------------------------------------------------------------------------|--------------------------------------------------------------------------------------------------------------------------------------------------------------------------------------------------------------------------------------------------------------------------------------------------------------------------------------------------------------------|----------------------------------------------------------------------------------------------------------------------------|
| hypoxia-inducible factor prolyl 4-hydroxylase                                                             | 4933406E20<br>Rik | NP_083220    | 57       | 1             | endoplasmic reticulum, integral to membrane, membrane                           | calcium ion binding, iron ion binding, L-ascorbic acid binding, metal ion binding, oxidoreductase activity, oxidoreductase activity, acting on paired donors, with incorporation or reduction of molecular oxygen, oxidoreductase activity, acting on single donors with incorporation of molecular oxygen, incorporation of two atoms of oxygen, zinc ion binding | oxidation reduction                                                                                                        |
| leucine rich repeat containing 17                                                                         | Lrrc17            | NP_083253    | 52       | 1             | not classified                                                                  | protein binding                                                                                                                                                                                                                                                                                                                                                    | not classified                                                                                                             |
| mitochondrial ribosomal protein L47                                                                       | Mrpl47            | NP_083293    | 30       | 1             | mitochondrial ribosome, mitochondrion, ribonucleoprotein complex, ribosome      | structural constituent of ribosome                                                                                                                                                                                                                                                                                                                                 | translation                                                                                                                |
| coiled-coil domain containing 7                                                                           | Ccdc7             | NP_083337    | 43       | 1             | cellular_component                                                              | molecular_function                                                                                                                                                                                                                                                                                                                                                 | biological_process                                                                                                         |
| pre-mRNA cleavage complex II protein Pcf11                                                                | Pcf11             | NP_083354    | 173      | 1             | not classified                                                                  | not classified                                                                                                                                                                                                                                                                                                                                                     | not classified                                                                                                             |
| hedgehog acyltransferase-like                                                                             | Hhat1             | NP_083371    | 56       | 1             | endoplasmic reticulum, integral to membrane, membrane                           | protein binding                                                                                                                                                                                                                                                                                                                                                    | negative regulation of N-terminal protein palmitoylation                                                                   |
| hypothetical protein LOC75425                                                                             | 2610036D13<br>Rik | NP_083558    | 121      | 1             | not classified                                                                  | binding                                                                                                                                                                                                                                                                                                                                                            | not classified                                                                                                             |
| progesterone-induced blocking factor 1 isoform a                                                          | Pibf1             | NP_083596    | 90       | 1             | not classified                                                                  | not classified                                                                                                                                                                                                                                                                                                                                                     | not classified                                                                                                             |
| acylphosphatase 2, muscle type                                                                            | Acyp2             | NP_083620    | 12       | 1             | not classified                                                                  | acylphosphatase activity, hydrolase activity                                                                                                                                                                                                                                                                                                                       | not classified                                                                                                             |
| cullin 2                                                                                                  | Cul2              | NP_083678    | 82       | 1             | cullin-RING ubiquitin ligase complex                                            | protein binding, ubiquitin protein ligase binding                                                                                                                                                                                                                                                                                                                  | modification-dependent protein catabolic process, protein catabolic process, ubiquitin-dependent protein catabolic process |
| ATPase, class VI, type 11B                                                                                | Atp11b            | NP_083846    | 134      | 1             | integral to membrane, membrane                                                  | ATP binding, hydrolase activity, magnesium ion binding, nucleotide binding                                                                                                                                                                                                                                                                                         | not classified                                                                                                             |
| thioredoxin domain containing 11 isoform 1                                                                | Txnbc11           | NP_083858    | 106      | 1             | endoplasmic reticulum, integral to membrane, membrane                           | not classified                                                                                                                                                                                                                                                                                                                                                     | cell redox homeostasis                                                                                                     |
| hypothetical protein LOC76416                                                                             | 1700022C21<br>Rik | NP_083878    | 35       | 1             | not classified                                                                  | not classified                                                                                                                                                                                                                                                                                                                                                     | not classified                                                                                                             |
| ADP-ribosylation factor related protein 1                                                                 | Arfrp1            | NP_083978    | 23       | 1             | Golgi apparatus, intracellular, membrane fraction                               | GTP binding, GTPase activity, nucleotide binding                                                                                                                                                                                                                                                                                                                   | gastrulation, small GTPase mediated signal transduction                                                                    |
| protein tyrosine phosphatase, receptor type, f polypeptide (PTPRF), interacting protein (Iiprin), alpha 3 | Ppfia3            | NP_084017    | 133      | 1             | cytoplasm                                                                       | not classified                                                                                                                                                                                                                                                                                                                                                     | not classified                                                                                                             |
| docking protein 5                                                                                         | Dok5              | NP_084037    | 35       | 1             | cellular_component                                                              | insulin receptor binding, transmembrane receptor protein tyrosine kinase signaling protein activity                                                                                                                                                                                                                                                                | MAPKKK cascade, nervous system development, transmembrane receptor protein tyrosine kinase signaling pathway               |
| hypothetical protein LOC76886                                                                             | 6430514L14<br>Rik | NP_084060    | 42       | 1             | not classified                                                                  | not classified                                                                                                                                                                                                                                                                                                                                                     | not classified                                                                                                             |
| golgi autoantigen, golgin subfamily a, 1                                                                  | Golga1            | NP_084069    | 87       | 1             | Golgi apparatus, membrane, perinuclear region of cytoplasm, trans-Golgi network | protein binding                                                                                                                                                                                                                                                                                                                                                    | not classified                                                                                                             |
| sec1 family domain containing 1                                                                           | Scfd1             | NP_084101    | 72       | 1             | cellular_component, cytoplasm, endoplasmic reticulum, Golgi apparatus, membrane | molecular_function                                                                                                                                                                                                                                                                                                                                                 | biological_process, protein transport, transport, vesicle docking during exocytosis, vesicle mediated transport            |
| GC-rich promoter binding protein 1-like 1                                                                 | Gbp111            | NP_084144    | 52       | 1             | nucleus                                                                         | DNA binding                                                                                                                                                                                                                                                                                                                                                        | regulation of transcription, transcription                                                                                 |
| tubulin-specific chaperone d                                                                              | Tbcd              | NP_084154    | 133      | 1             | not classified                                                                  | not classified                                                                                                                                                                                                                                                                                                                                                     | not classified                                                                                                             |

| Protein Name                                                                                 | Gene Name  | Accession No | Mw (kDa) | Peptide Count | GO Component                                                                                                           | GO Function                                                                                                                                                                     | GO Process                                                                                                  |
|----------------------------------------------------------------------------------------------|------------|--------------|----------|---------------|------------------------------------------------------------------------------------------------------------------------|---------------------------------------------------------------------------------------------------------------------------------------------------------------------------------|-------------------------------------------------------------------------------------------------------------|
| PRELI domain containing 2                                                                    | Preli2     | NP_084218    | 20       | 1             | not classified                                                                                                         | not classified                                                                                                                                                                  | not classified                                                                                              |
| CDKN2A interacting protein N-terminal like                                                   | Cdkn2aipnl | NP_084252    | 13       | 1             | not classified                                                                                                         | not classified                                                                                                                                                                  | not classified                                                                                              |
| DEAD (Asp-Glu-Ala-Asp) box polypeptide 52                                                    | Ddx52      | NP_084372    | 67       | 1             | nucleus                                                                                                                | ATP binding, ATP-dependent helicase activity, helicase activity, hydrolase activity, nucleic acid binding, nucleotide binding, RNA binding                                      | not classified                                                                                              |
| transmembrane protein 33 isoform 2                                                           | Tmem33     | NP_084384    | 28       | 1             | cellular_component, integral to membrane, membrane                                                                     | protein binding                                                                                                                                                                 | biological_process                                                                                          |
| LSM6 homolog, U6 small nuclear RNA associated                                                | Lsm6       | NP_084421    | 9        | 1             | cytoplasm, nucleus, ribonucleoprotein complex                                                                          | protein heterodimerization activity, RNA binding                                                                                                                                | mRNA catabolic process, mRNA processing, RNA splicing, rRNA processing, tRNA processing                     |
| GIN5 complex subunit 3                                                                       | Gins3      | NP_084474    | 25       | 1             | nucleus                                                                                                                | not classified                                                                                                                                                                  | DNA replication                                                                                             |
| coronin 7                                                                                    | Coro7      | NP_084481    | 101      | 1             | cytoplasm, cytoplasmic vesicle, Golgi apparatus, integral to membrane of membrane fraction, membrane, soluble fraction | not classified                                                                                                                                                                  | not classified                                                                                              |
| vacuolar protein sorting 16                                                                  | Vps16      | NP_085036    | 95       | 1             | actin filament, cytoplasm, early endosome, endosome, lysosome, membrane                                                | actin binding, protein binding                                                                                                                                                  | biological_process, intracellular protein transport, protein transport, transport                           |
| histone cluster 1, H1a                                                                       | Hist1h1a   | NP_085112    | 22       | 1             | chromosome, nucleosome, nucleus                                                                                        | DNA binding                                                                                                                                                                     | nucleosome assembly, spermatogenesis                                                                        |
| aldo-keto reductase family 1, member C6                                                      | Akr1c6     | NP_085114    | 37       | 1             | cellular_component                                                                                                     | estradiol 17-beta-dehydrogenase activity, oxidoreductase activity                                                                                                               | lipid biosynthetic process, oxidation reduction, steroid biosynthetic process, steroid metabolic process    |
| protein kinase C and casein kinase substrate in neurons 3                                    | Pacsin3    | NP_112019    | 49       | 1             | cytoplasm, membrane, plasma membrane, trans-Golgi network                                                              | cytoskeletal protein binding, kinase activity, protein binding                                                                                                                  | endocytosis, negative regulation of endocytosis                                                             |
| WD repeat domain 10                                                                          | Ift122     | NP_112454    | 135      | 1             | cytoplasm, flagellum                                                                                                   | not classified                                                                                                                                                                  | not classified                                                                                              |
| solute carrier family 19 (sodium/hydrogen exchanger), member 1                               | Slc19a1    | NP_112473    | 58       | 1             | integral to membrane, membrane                                                                                         | folic acid binding, reduced folate carrier activity                                                                                                                             | transport                                                                                                   |
| solute carrier family 2 (facilitated glucose transporter), member 2                          | Slc2a2     | NP_112474    | 57       | 1             | brush border, integral to membrane, membrane, plasma membrane                                                          | glucose transmembrane transporter activity, substrate-specific transmembrane transporter activity, transporter activity                                                         | carbohydrate transport, transmembrane transport, transport                                                  |
| pleckstrin homology domain-containing, family A (phosphoinositide binding specific) member 3 | Plekha3    | NP_112546    | 33       | 1             | cytoplasm, membrane                                                                                                    | lipid binding, phosphatidylinositol binding                                                                                                                                     | not classified                                                                                              |
| testis expressed gene 14                                                                     | Tex14      | NP_113563    | 163      | 1             | cytoplasm                                                                                                              | ATP binding, nucleotide binding, protein kinase activity, protein tyrosine kinase activity                                                                                      | protein amino acid phosphorylation                                                                          |
| ectonucleotide pyrophosphatase/phosphodiesterase 5                                           | Enpp5      | NP_114392    | 54       | 1             | extracellular region, integral to membrane, integral to plasma membrane, membrane                                      | catalytic activity, hydrolase activity, nucleotide diphosphatase activity                                                                                                       | metabolic process, nucleotide catabolic process                                                             |
| ring finger protein 123                                                                      | Rnf123     | NP_115932    | 149      | 1             | cellular_component, cytoplasm                                                                                          | ligase activity, metal ion binding, molecular_function, protein binding, zinc ion binding                                                                                       | biological_process, modification-dependent protein catabolic process                                        |
| threonyl-tRNA synthetase                                                                     | Tars       | NP_149065    | 83       | 1             | cytoplasm                                                                                                              | aminoacyl-tRNA ligase activity, ATP binding, ligase activity, ligase activity, forming aminoacyl-tRNA and related compounds, nucleotide binding, threonine-tRNA ligase activity | threonyl-tRNA aminoacylation, translation, tRNA aminoacylation, tRNA aminoacylation for protein translation |

| Protein Name                                  | Gene Name | Accession No | Mw (kDa) | Peptide Count | GO Component                                                                                                                | GO Function                                                                                                                                                                                    | GO Process                                                                                                                                                                                                                                                                                                                                                                                                                      |
|-----------------------------------------------|-----------|--------------|----------|---------------|-----------------------------------------------------------------------------------------------------------------------------|------------------------------------------------------------------------------------------------------------------------------------------------------------------------------------------------|---------------------------------------------------------------------------------------------------------------------------------------------------------------------------------------------------------------------------------------------------------------------------------------------------------------------------------------------------------------------------------------------------------------------------------|
| cholinergic receptor, muscarinic 3, cardiac   | Chrm3     | NP_150372    | 66       | 1             | cell junction, integral to membrane, integral to plasma membrane, membrane, plasma membrane, postsynaptic membrane, synapse | acetylcholine receptor activity, G-protein coupled receptor activity, muscarinic acetylcholine receptor activity, receptor activity, signal transducer activity                                | activation of phospholipase C activity by muscarinic acetylcholine receptor signaling pathway, digestion, G-protein coupled receptor protein signaling pathway, muscarinic acetylcholine receptor signaling pathway, positive regulation of smooth muscle contraction, signal transduction, smooth muscle contraction, synaptic transmission, cholinergic                                                                       |
| sprouty-related protein 1 with EVH-1 domain   | Spred1    | NP_277059    | 51       | 1             | membrane, nucleus, plasma membrane                                                                                          | protein binding, stem cell factor receptor binding                                                                                                                                             | inactivation of MAPK activity, multicellular organismal development, regulation of signal transduction                                                                                                                                                                                                                                                                                                                          |
| dachshund 2                                   | Dach2     | NP_291083    | 69       | 1             | nucleus                                                                                                                     | DNA binding, protein binding                                                                                                                                                                   | multicellular organismal development, regulation of transcription, transcription                                                                                                                                                                                                                                                                                                                                                |
| component of Sp100-rs                         | Csprs     | NP_291094    | 33       | 1             | nucleus                                                                                                                     | receptor activity                                                                                                                                                                              | not classified                                                                                                                                                                                                                                                                                                                                                                                                                  |
| suppressor of Ty 16 homolog                   | Supt16h   | NP_291096    | 120      | 1             | chromosome, nucleus                                                                                                         | not classified                                                                                                                                                                                 | cellular process, DNA repair, DNA replication, regulation of transcription, response to DNA damage stimulus, transcription                                                                                                                                                                                                                                                                                                      |
| cytochrome c oxidase, subunit VIc             | Cox6c     | NP_444301    | 8        | 1             | integral to membrane, membrane, mitochondrial inner membrane, mitochondrion                                                 | cytochrome-c oxidase activity                                                                                                                                                                  | biological_process                                                                                                                                                                                                                                                                                                                                                                                                              |
| RAS-homolog enriched in brain                 | Rheb      | NP_444305    | 20       | 1             | intracellular, membrane, plasma membrane, spliceosomal complex                                                              | GTP binding, magnesium ion binding, metal ion binding, nucleotide binding                                                                                                                      | small GTPase mediated signal transduction                                                                                                                                                                                                                                                                                                                                                                                       |
| reticulon 3 isoform 4                         | Rtn3      | NP_444306    | 25       | 1             | endoplasmic reticulum, Golgi apparatus, integral to membrane, membrane                                                      | molecular_function, protein binding                                                                                                                                                            | apoptosis, transport, vesicle-mediated transport                                                                                                                                                                                                                                                                                                                                                                                |
| aldehyde dehydrogenase family 1, subfamily A3 | Aldh1a3   | NP_444310    | 56       | 1             | cytoplasm                                                                                                                   | 3-chloroallyl aldehyde dehydrogenase activity, aldehyde dehydrogenase (NAD) activity, aldehyde dehydrogenase [NAD(P)+] activity, NAD binding, oxidoreductase activity, thyroid hormone binding | embryonic camera-type eye development, embryonic eye morphogenesis, face development, metabolic process, nucleus accumbens development, olfactory pit development, optic cup morphogenesis involved in camera-type eye development, oxidation reduction, positive regulation of apoptosis, positive regulation of retinoic acid receptor signaling pathway, retinoic acid biosynthetic process, retinoic acid metabolic process |
| 15 kDa selenoprotein precursor                | 15-Sep    | NP_444332    | 18       | 1             | endoplasmic reticulum, endoplasmic reticulum lumen                                                                          | protein binding, selenium binding                                                                                                                                                              | 'de novo' posttranslational protein folding                                                                                                                                                                                                                                                                                                                                                                                     |
| poly A binding protein, cytoplasmic 5         | Pabpc5    | NP_444344    | 43       | 1             | cellular_component                                                                                                          | molecular_function                                                                                                                                                                             | biological_process                                                                                                                                                                                                                                                                                                                                                                                                              |
| wingless-related MMTV integration site 16     | Wnt16     | NP_444346    | 41       | 1             | extracellular region, proteinaceous extracellular matrix                                                                    | signal transducer activity                                                                                                                                                                     | multicellular organismal development, Wnt receptor signaling pathway, Wnt receptor signaling pathway, calcium modulating pathway                                                                                                                                                                                                                                                                                                |



| Protein Name                                                                                      | Gene Name | Accession No | Mw (kDa) | Peptide Count | GO Component                                                                               | GO Function                                                                                                                                                                                                                                                                                        | GO Process                                                                                                                                                                             |
|---------------------------------------------------------------------------------------------------|-----------|--------------|----------|---------------|--------------------------------------------------------------------------------------------|----------------------------------------------------------------------------------------------------------------------------------------------------------------------------------------------------------------------------------------------------------------------------------------------------|----------------------------------------------------------------------------------------------------------------------------------------------------------------------------------------|
| SWI/SNF related, matrix associated, actin dependent regulator of chromatin, subfamily a, member 5 | Smarca5   | NP_444354    | 122      | 1             | chromatin remodeling complex, nucleus                                                      | ATP binding, ATP-dependent helicase activity, DNA binding, helicase activity, hydrolase activity, acting on acid anhydrides, in phosphorus-containing anhydrides, nucleic acid binding, nucleosome binding, nucleotide binding, transcription activator activity, transcription regulator activity | ATP-dependent chromatin remodeling, chromatin assembly or disassembly, chromatin modification, chromatin remodeling, embryonic development, regulation of transcription, DNA-dependent |
| protocadherin beta 14                                                                             | Pcdhb14   | NP_444369    | 87       | 1             | integral to membrane, membrane, plasma membrane                                            | calcium ion binding, protein binding                                                                                                                                                                                                                                                               | cell adhesion, homophilic cell adhesion                                                                                                                                                |
| protocadherin beta 17                                                                             | Pcdhb17   | NP_444372    | 88       | 1             | integral to membrane, membrane                                                             | calcium ion binding, protein binding                                                                                                                                                                                                                                                               | cell adhesion                                                                                                                                                                          |
| mitochondrial ribosomal protein L43                                                               | Mrpl43    | NP_444394    | 18       | 1             | mitochondrial large ribosomal subunit, mitochondrion, ribonucleoprotein complex, ribosome  | molecular_function                                                                                                                                                                                                                                                                                 | translation                                                                                                                                                                            |
| cortactin binding protein 2                                                                       | Cttnbp2   | NP_525024    | 179      | 1             | actin cytoskeleton                                                                         | cytoskeletal regulatory protein binding                                                                                                                                                                                                                                                            | actin cytoskeleton organization                                                                                                                                                        |
| SMC (structural maintenance of chromosomes 1)-like 2                                              | Smc1b     | NP_536718    | 145      | 1             | chromosome, chromosome, centromeric region, lateral element, nucleus, synaptonemal complex | ATP binding, DNA binding, nucleotide binding, protein binding                                                                                                                                                                                                                                      | cell cycle, chromosome organization, meiosis, sister chromatid cohesion                                                                                                                |
| histidyl-tRNA synthetase-like                                                                     | Hars2     | NP_542367    | 57       | 1             | cytoplasm, mitochondrion                                                                   | aminoacyl-tRNA ligase activity, ATP binding, histidine-tRNA ligase activity, ligase activity, nucleotide binding                                                                                                                                                                                   | histidyl-tRNA aminoacylation, translation, tRNA aminoacylation for protein translation                                                                                                 |
| PAS domain containing serine/threonine kinase                                                     | Pask      | NP_543126    | 151      | 1             | cytoplasm, intracellular                                                                   | ATP binding, kinase activity, nucleotide binding, protein kinase activity, protein serine/threonine kinase activity, signal transducer activity, transferase activity                                                                                                                              | protein amino acid phosphorylation, regulation of transcription, DNA-dependent, signal transduction                                                                                    |
| toll-like receptor 7                                                                              | Tlr7      | NP_573474    | 122      | 1             | integral to membrane, intrinsic to membrane, membrane                                      | protein binding, receptor activity, transmembrane receptor activity                                                                                                                                                                                                                                | immune response, inflammatory response, innate immune response, positive regulation of interleukin-6 production, signal transduction                                                   |
| zinc finger protein 704                                                                           | Zfp704    | NP_573481    | 61       | 1             | intracellular                                                                              | metal ion binding, zinc ion binding                                                                                                                                                                                                                                                                | not classified                                                                                                                                                                         |

| Protein Name                                               | Gene Name      | Accession No | Mw (kDa) | Peptide Count | GO Component                                                                    | GO Function                                                                                                 | GO Process                                                                                                                                                                                                                                                                                                                                                                                                                                                                                                                                            |
|------------------------------------------------------------|----------------|--------------|----------|---------------|---------------------------------------------------------------------------------|-------------------------------------------------------------------------------------------------------------|-------------------------------------------------------------------------------------------------------------------------------------------------------------------------------------------------------------------------------------------------------------------------------------------------------------------------------------------------------------------------------------------------------------------------------------------------------------------------------------------------------------------------------------------------------|
| GS homeobox 2                                              | Gsx2           | NP_573555    | 32       | 1             | nucleus                                                                         | DNA binding, sequence-specific DNA binding, transcription factor activity, transcription regulator activity | brain development, central nervous system development, forebrain dorsal/ventral pattern formation, forebrain morphogenesis, hindbrain morphogenesis, multicellular organismal development, neuron fate specification, olfactory bulb interneuron differentiation, pattern specification process, regulation of respiratory gaseous exchange by neurological system process, regulation of transcription, regulation of transcription, DNA-dependent, spinal cord association neuron differentiation, subpallium neuron fate commitment, transcription |
| v-crk sarcoma virus CT10 oncogene homolog                  | Crk            | NP_598417    | 34       | 1             | cytoplasm, membrane, plasma membrane                                            | kinase activity, protein binding, protein phosphorylated amino acid binding, SH3/SH2 adaptor activity       | not classified                                                                                                                                                                                                                                                                                                                                                                                                                                                                                                                                        |
| avian erythroblastosis virus E-26 (v-ets) oncogene related | Erg            | NP_598420    | 55       | 1             | nucleus                                                                         | DNA binding, protein binding, sequence-specific DNA binding, transcription factor activity                  | regulation of transcription, regulation of transcription, DNA-dependent, transcription                                                                                                                                                                                                                                                                                                                                                                                                                                                                |
| Rab31-like                                                 | Rab31          | NP_598446    | 21       | 1             | membrane, plasma membrane                                                       | GTP binding, nucleotide binding                                                                             | protein transport, small GTPase mediated signal transduction                                                                                                                                                                                                                                                                                                                                                                                                                                                                                          |
| poly-U binding splicing factor 60 isoform b                | Puf60          | NP_598452    | 59       | 1             | nucleus, ribonucleoprotein complex                                              | DNA binding, nucleic acid binding, nucleotide binding, RNA binding                                          | apoptosis, mRNA processing, regulation of transcription, RNA splicing, transcription                                                                                                                                                                                                                                                                                                                                                                                                                                                                  |
| pyrroline-5-carboxylate reductase family, member 2         | Pycr2          | NP_598466    | 34       | 1             | not classified                                                                  | binding, catalytic activity, oxidoreductase activity, pyrroline-5-carboxylate reductase activity            | cellular amino acid biosynthetic process, metabolic process, oxidation reduction, proline biosynthetic process                                                                                                                                                                                                                                                                                                                                                                                                                                        |
| suppression of tumorigenicity 13                           | St13           | NP_598487    | 42       | 1             | cytoplasm                                                                       | binding                                                                                                     | not classified                                                                                                                                                                                                                                                                                                                                                                                                                                                                                                                                        |
| WD repeat domain 23                                        | Wdr23          | NP_598495    | 62       | 1             | not classified                                                                  | not classified                                                                                              | not classified                                                                                                                                                                                                                                                                                                                                                                                                                                                                                                                                        |
| hypothetical protein LOC72722                              | 2810405J04 Rik | NP_598508    | 55       | 1             | not classified                                                                  | not classified                                                                                              | not classified                                                                                                                                                                                                                                                                                                                                                                                                                                                                                                                                        |
| nuclear pore complex-associated protein Tpr                | Tpr            | NP_598541    | 267      | 1             | nuclear envelope                                                                | molecular_function                                                                                          | biological_process                                                                                                                                                                                                                                                                                                                                                                                                                                                                                                                                    |
| lamin B receptor                                           | Lbr            | NP_598576    | 71       | 1             | integral to membrane, membrane, nuclear inner membrane, nuclear lamina, nucleus | DNA binding, nucleic acid binding, receptor activity                                                        | not classified                                                                                                                                                                                                                                                                                                                                                                                                                                                                                                                                        |
| EH-domain containing 4                                     | Ehd4           | NP_598599    | 61       | 1             | endosome, membrane                                                              | ATP binding, calcium ion binding, GTP binding, GTPase activity, nucleotide binding, protein binding         | not classified                                                                                                                                                                                                                                                                                                                                                                                                                                                                                                                                        |
| olfactomedin-like 3                                        | Olfml3         | NP_598620    | 46       | 1             | extracellular region                                                            | not classified                                                                                              | multicellular organismal development                                                                                                                                                                                                                                                                                                                                                                                                                                                                                                                  |
| KDEL endoplasmic reticulum protein retention receptor 1    | Kdelr1         | NP_598711    | 25       | 1             | endoplasmic reticulum, integral to membrane, membrane                           | ER retention sequence binding, receptor activity                                                            | protein retention in ER lumen, protein transport, transport, vesicle-mediated transport                                                                                                                                                                                                                                                                                                                                                                                                                                                               |
| CUB domain-containing protein 1                            | Cdcp1          | NP_598735    | 93       | 1             | integral to membrane, membrane, plasma membrane                                 | not classified                                                                                              | not classified                                                                                                                                                                                                                                                                                                                                                                                                                                                                                                                                        |

| Protein Name                                              | Gene Name   | Accession No | Mw (kDa) | Peptide Count | GO Component                                                                                       | GO Function                                                                                                                                                                        | GO Process                                                                                         |
|-----------------------------------------------------------|-------------|--------------|----------|---------------|----------------------------------------------------------------------------------------------------|------------------------------------------------------------------------------------------------------------------------------------------------------------------------------------|----------------------------------------------------------------------------------------------------|
| thyroid hormone receptor interactor 12                    | Trip12      | NP_598736    | 224      | 1             | not classified                                                                                     | ligase activity                                                                                                                                                                    | modification-dependent protein catabolic process                                                   |
| methionine adenosyltransferase II, beta                   | Mat2b       | NP_598778    | 37       | 1             | not classified                                                                                     | binding, catalytic activity, dTDP-4-dehydrothiamine reductase activity                                                                                                             | extracellular polysaccharide biosynthetic process, metabolic process, one-carbon metabolic process |
| transmembrane emp24 protein transport domain containing 4 | Tmed4       | NP_598781    | 26       | 1             | endoplasmic reticulum, integral to membrane, membrane                                              | not classified                                                                                                                                                                     | transport                                                                                          |
| 5',3'-nucleotidase, mitochondrial                         | Nt5m        | NP_598790    | 26       | 1             | mitochondrion                                                                                      | 5'-nucleotidase activity, hydrolase activity, magnesium ion binding, metal ion binding, nucleotide binding, phosphatase activity                                                   | dUMP catabolic process, nucleotide metabolic process                                               |
| FERMRhoGEF (Arhgef) and pleckstrin domain protein 1       | Farp1       | NP_598843    | 119      | 1             | cellular_component, cytoplasm                                                                      | molecular_function                                                                                                                                                                 | biological_process                                                                                 |
| neurocalcin delta                                         | Ncald       | NP_598855    | 22       | 1             | not classified                                                                                     | calcium ion binding                                                                                                                                                                | not classified                                                                                     |
| immunoglobulin-like domain containing receptor 1          | Ildr1       | NP_598870    | 59       | 1             | integral to membrane, membrane, plasma membrane                                                    | receptor activity                                                                                                                                                                  | not classified                                                                                     |
| acyl-CoA thioesterase 2                                   | Acot2       | NP_598949    | 50       | 1             | mitochondrion                                                                                      | acyl-CoA thioesterase activity, carboxylesterase activity, hydrolase activity, palmitoyl-CoA hydrolase activity, thiolester hydrolase activity                                     | acyl-CoA metabolic process, lipid metabolic process                                                |
| Yip1 domain family, member 2                              | Yipf2       | NP_612176    | 35       | 1             | integral to membrane, membrane                                                                     | not classified                                                                                                                                                                     | not classified                                                                                     |
| G7c protein                                               | D17H6S56E-3 | NP_613048    | 96       | 1             | extracellular region                                                                               | not classified                                                                                                                                                                     | not classified                                                                                     |
| D6Wsu176e protein                                         | D6Wsu176e   | NP_613053    | 25       | 1             | extracellular region                                                                               | not classified                                                                                                                                                                     | not classified                                                                                     |
| phosphatidate cytidylyltransferase 2                      | Cds2        | NP_619592    | 51       | 1             | endoplasmic reticulum, integral to membrane, membrane, mitochondrial inner membrane, mitochondrion | nucleotidyltransferase activity, phosphatidate cytidylyltransferase activity, transferase activity, transferase activity, transferring phosphorus-containing groups                | phospholipid biosynthetic process                                                                  |
| leucine rich repeat containing 4                          | Lrrc4       | NP_619623    | 73       | 1             | integral to membrane, membrane                                                                     | protein binding                                                                                                                                                                    | not classified                                                                                     |
| O-linked N-acetylglucosamine transferase                  | Ogt         | NP_631883    | 117      | 1             | cytoplasm, intracellular, nucleus                                                                  | binding, N-acetyltransferase activity, protein binding, protein N-acetylglucosaminyltransferase activity, transferase activity, transferase activity, transferring glycosyl groups | protein amino acid O-linked glycosylation                                                          |
| developmental pluripotency-associated 3                   | Dppa3       | NP_631964    | 18       | 1             | cytoplasm, female pronucleus, male pronucleus, nucleus                                             | not classified                                                                                                                                                                     | embryonic cleavage                                                                                 |
| UDP-glucose pyrophosphorylase 2                           | Ugp2        | NP_647458    | 57       | 1             | cytoplasm                                                                                          | nucleotidyltransferase activity, transferase activity, UTP:glucose-1-phosphate uridylyltransferase activity                                                                        | metabolic process                                                                                  |
| interleukin 31 receptor A                                 | Il31ra      | NP_647460    | 81       | 1             | integral to membrane, membrane, plasma membrane                                                    | cytokine receptor activity, receptor activity                                                                                                                                      | immune response                                                                                    |
| kinesin family member 18A                                 | Kif18a      | NP_647464    | 101      | 1             | microtubule                                                                                        | ATP binding, microtubule motor activity, motor activity, nucleotide binding                                                                                                        | microtubule-based movement, protein transport, transport                                           |
| basic, immunoglobulin-like variable motif containing      | Bivm        | NP_653141    | 57       | 1             | cellular_component, cytoplasm, nucleus                                                             | molecular_function                                                                                                                                                                 | biological_process                                                                                 |
| sushi domain containing 4                                 | Susd4       | NP_659045    | 54       | 1             | integral to membrane, membrane                                                                     | not classified                                                                                                                                                                     | not classified                                                                                     |
| transmembrane protein 40                                  | Tmem40      | NP_659054    | 25       | 1             | integral to membrane, membrane                                                                     | not classified                                                                                                                                                                     | not classified                                                                                     |

| Protein Name                                                             | Gene Name | Accession No | Mw (kDa) | Peptide Count | GO Component                                                                                                                            | GO Function                                                                                                                                                                                         | GO Process                                                                                    |
|--------------------------------------------------------------------------|-----------|--------------|----------|---------------|-----------------------------------------------------------------------------------------------------------------------------------------|-----------------------------------------------------------------------------------------------------------------------------------------------------------------------------------------------------|-----------------------------------------------------------------------------------------------|
| phosphoribosyl pyrophosphate synthetase-associated protein 2             | Prpsap2   | NP_659055    | 41       | 1             | not classified                                                                                                                          | magnesium ion binding, ribose phosphate diphosphokinase activity                                                                                                                                    | nucleoside metabolic process, nucleotide biosynthetic process                                 |
| hypothetical protein LOC215929                                           | AI317395  | NP_659070    | 41       | 1             | integral to membrane, membrane, plasma membrane                                                                                         | sodium ion binding, symporter activity                                                                                                                                                              | carbohydrate transport, ion transport, sodium ion transport, transport                        |
| protein phosphatase 1, regulatory (inhibitor) subunit 1B                 | Ppp1r1b   | NP_659077    | 22       | 1             | cytoplasm, nucleus                                                                                                                      | phosphoprotein phosphatase inhibitor activity, protein serine/threonine phosphatase inhibitor activity                                                                                              | negative regulation of female receptivity, signal transduction, transcription                 |
| alanyl-tRNA synthetase domain containing 1                               | Aarsd1    | NP_659078    | 45       | 1             | cytoplasm                                                                                                                               | alanine-tRNA ligase activity, aminoacyl-tRNA ligase activity, ATP binding, ligase activity, forming aminoacyl-tRNA and related compounds, nucleic acid binding, nucleotide binding, protein binding | alanyl-tRNA aminoacylation, translation, tRNA aminoacylation                                  |
| BAP28 protein                                                            | Heatr1    | NP_659084    | 242      | 1             | not classified                                                                                                                          | not classified                                                                                                                                                                                      | not classified                                                                                |
| hypothetical protein LOC234564                                           | AU018778  | NP_659179    | 62       | 1             | not classified                                                                                                                          | carboxylesterase activity, hydrolase activity                                                                                                                                                       | not classified                                                                                |
| eukaryotic translation initiation factor 3 subunit 6 interacting protein | Eif3eip   | NP_660121    | 67       | 1             | cytoplasm, eukaryotic translation initiation factor 3 complex, fibrillar center, nucleolus, nucleoplasm                                 | protein binding, translation initiation factor activity                                                                                                                                             | translation, translational initiation                                                         |
| carbohydrate sulfotransferase 10                                         | Chst10    | NP_660124    | 44       | 1             | cellular_component, Golgi apparatus, integral to membrane, membrane                                                                     | sulfotransferase activity, transferase activity                                                                                                                                                     | carbohydrate biosynthetic process, carbohydrate metabolic process, learning, long-term memory |
| GRP1-binding protein GRSP1                                               | Frm4b     | NP_660130    | 112      | 1             | cytoplasm, cytoskeleton                                                                                                                 | binding                                                                                                                                                                                             | not classified                                                                                |
| NOL1/NOP2/Sun domain family member 2                                     | Nsun2     | NP_663329    | 78       | 1             | cytoplasm, nucleus                                                                                                                      | methyltransferase activity, RNA binding, transferase activity, tRNA (cytosine-5)-methyltransferase activity, tRNA binding                                                                           | tRNA processing                                                                               |
| G protein pathway suppressor 1                                           | Gps1      | NP_663345    | 53       | 1             | cytoplasm, nucleus, signalosome                                                                                                         | protein binding                                                                                                                                                                                     | not classified                                                                                |
| lactamase, beta 2                                                        | Lactb2    | NP_663356    | 33       | 1             | mitochondrion                                                                                                                           | hydrolase activity, metal ion binding, zinc ion binding                                                                                                                                             | not classified                                                                                |
| hypothetical protein LOC28088                                            | D10Wsu52e | NP_663397    | 55       | 1             | cellular_component                                                                                                                      | molecular_function                                                                                                                                                                                  | biological_process                                                                            |
| lethal giant larvae homolog 2                                            | Llgl2     | NP_663413    | 114      | 1             | cellular_component, cytoplasm                                                                                                           | molecular_function                                                                                                                                                                                  | biological_process, cell cycle, cell division, exocytosis                                     |
| peroxisomal biogenesis factor 6                                          | Pex6      | NP_663463    | 105      | 1             | cytoplasm, membrane, peroxisome                                                                                                         | ATP binding, nucleoside-triphosphatase activity, nucleotide binding, protein binding                                                                                                                | peroxisome organization                                                                       |
| hypothetical protein LOC224893                                           | BC011426  | NP_663465    | 63       | 1             | nucleus                                                                                                                                 | metal ion binding, zinc ion binding                                                                                                                                                                 | transcription                                                                                 |
| solute carrier family 5 (sodium/glucose cotransporter), member 9         | Slc5a9    | NP_663526    | 75       | 1             | integral to membrane, membrane                                                                                                          | sodium ion binding, transporter activity                                                                                                                                                            | ion transport, sodium ion transport, transport                                                |
| tetratricopeptide repeat domain 13                                       | Ttc13     | NP_663582    | 85       | 1             | not classified                                                                                                                          | not classified                                                                                                                                                                                      | not classified                                                                                |
| leucine rich repeat containing 49                                        | Lrrc49    | NP_663591    | 86       | 1             | cytoplasm, cytoskeleton, microtubule                                                                                                    | protein binding                                                                                                                                                                                     | not classified                                                                                |
| hypothetical protein LOC106064                                           | AW549877  | NP_666042    | 33       | 1             | not classified                                                                                                                          | not classified                                                                                                                                                                                      | not classified                                                                                |
| zinc finger CCHC type containing 7                                       | Zc3h7a    | NP_666043    | 99       | 1             | not classified                                                                                                                          | metal ion binding, zinc ion binding                                                                                                                                                                 | not classified                                                                                |
| spectrin SH3 domain binding protein 1 isoform 2                          | Abi1      | NP_666106    | 52       | 1             | cell junction, cell leading edge, cell projection, cytoplasm, cytoskeleton, intracellular, lamellipodium, nucleus, synapse, synaptosome | protein binding, protein tyrosine kinase activator activity                                                                                                                                         | cellular process, peptidyl-tyrosine phosphorylation, somitogenesis                            |

| Protein Name                                                 | Gene Name      | Accession No | Mw (kDa) | Peptide Count | GO Component                                                                               | GO Function                                                                                                                                                                     | GO Process                                                                                                                   |
|--------------------------------------------------------------|----------------|--------------|----------|---------------|--------------------------------------------------------------------------------------------|---------------------------------------------------------------------------------------------------------------------------------------------------------------------------------|------------------------------------------------------------------------------------------------------------------------------|
| hypothetical protein LOC237711                               | C230094A16 Rik | NP_666128    | 218      | 1             | cytoplasm, microtubule                                                                     | not classified                                                                                                                                                                  | not classified                                                                                                               |
| glycolipid transfer protein domain containing 2              | Gltpd2         | NP_666132    | 34       | 1             | cytoplasm                                                                                  | glycolipid binding, glycolipid transporter activity                                                                                                                             | glycolipid transport                                                                                                         |
| potassium channel, subfamily K, member 13                    | Kcnk13         | NP_666149    | 45       | 1             | integral to membrane, membrane                                                             | ion channel activity, potassium channel activity, potassium ion binding, voltage-gated ion channel activity                                                                     | ion transport, potassium ion transport, transport                                                                            |
| proline rich protein 5                                       | Prr5           | NP_666173    | 43       | 1             | not classified                                                                             | GTPase activator activity                                                                                                                                                       | actin cytoskeleton organization, cell cycle, positive regulation of cell migration                                           |
| keratin 6L                                                   | Krt79          | NP_666175    | 58       | 1             | intermediate filament, keratin filament                                                    | structural molecule activity                                                                                                                                                    | not classified                                                                                                               |
| hypothetical protein LOC227737                               | 9130404D14 Rik | NP_666231    | 85       | 1             | not classified                                                                             | not classified                                                                                                                                                                  | not classified                                                                                                               |
| PDX1 C-terminal inhibiting factor 1                          | Pcif1          | NP_666241    | 81       | 1             | nucleus                                                                                    | protein binding                                                                                                                                                                 | not classified                                                                                                               |
| Rho GTPase activating protein 24 isoform 2                   | Arhgap24       | NP_666273    | 73       | 1             | cell junction, cell projection, cellular_component, cytoplasm, cytoskeleton, intracellular | GTPase activator activity, molecular_function                                                                                                                                   | angiogenesis, biological_process, cell differentiation, multicellular organismal development, signal transduction            |
| putative DNA glycosylase                                     | Neil3          | NP_666320    | 67       | 1             | intracellular, nucleus                                                                     | damaged DNA binding, DNA binding, DNA-(apurinic or apyrimidinic site) lyase activity, hydrolase activity, hydrolyzing N-glycosyl compounds, metal ion binding, zinc ion binding | base-excision repair, DNA repair, nucleotide-excision repair, response to DNA damage stimulus                                |
| Vac14 homolog                                                | Vac14          | NP_666328    | 88       | 1             | endoplasmic reticulum, endosome, membrane, microsome, vacuolar membrane                    | binding, kinase activator activity                                                                                                                                              | cell death, response to osmotic stress                                                                                       |
| gem (nuclear organelle) associated protein 8                 | Gemin8         | NP_666350    | 28       | 1             | cytoplasm, nucleus, spliceosomal complex                                                   | not classified                                                                                                                                                                  | mRNA processing, RNA splicing                                                                                                |
| olfactory receptor 727                                       | Olf727         | NP_666431    | 37       | 1             | integral to membrane                                                                       | G-protein coupled receptor activity, olfactory receptor activity, receptor activity, signal transducer activity                                                                 | G-protein coupled receptor protein signaling pathway, sensory perception of smell, signal transduction                       |
| olfactory receptor 883                                       | Olf883         | NP_666531    | 35       | 1             | integral to membrane                                                                       | olfactory receptor activity, receptor activity                                                                                                                                  | G-protein coupled receptor protein signaling pathway, sensory perception of smell                                            |
| olfactory receptor 868                                       | Olf868         | NP_666770    | 34       | 1             | integral to membrane                                                                       | G-protein coupled receptor activity, olfactory receptor activity, receptor activity, signal transducer activity                                                                 | G-protein coupled receptor protein signaling pathway, sensory perception of smell, signal transduction                       |
| olfactory receptor 146                                       | Olf146         | NP_666958    | 34       | 1             | integral to membrane, membrane, plasma membrane                                            | G-protein coupled receptor activity, olfactory receptor activity, receptor activity, signal transducer activity                                                                 | G-protein coupled receptor protein signaling pathway, response to stimulus, sensory perception of smell, signal transduction |
| solute carrier family 8 (sodium/calcium exchanger), member 2 | Slc8a2         | NP_683748    | 101      | 1             | integral to membrane, membrane                                                             | not classified                                                                                                                                                                  | not classified                                                                                                               |
| cell division cycle 5-like                                   | Cdc5l          | NP_690023    | 92       | 1             | cytoplasm, nucleus, spliceosomal complex                                                   | DNA binding, RNA binding                                                                                                                                                        | cell cycle, mRNA processing, regulation of transcription, RNA splicing, transcription                                        |
| matrix metalloproteinase 21                                  | Mmp21          | NP_694423    | 65       | 1             | cellular_component, extracellular region, proteinaceous extracellular matrix               | calcium ion binding, hydrolase activity, metal ion binding, metalloendopeptidase activity, metalloproteinase activity, peptidase activity, zinc ion binding                     | biological_process, metabolic process, proteolysis                                                                           |

| Protein Name                                        | Gene Name     | Accession No | Mw (kDa) | Peptide Count | GO Component                                                                                              | GO Function                                                                                                                                                                                                                                                             | GO Process                                                                                                                                                                                                                                                   |
|-----------------------------------------------------|---------------|--------------|----------|---------------|-----------------------------------------------------------------------------------------------------------|-------------------------------------------------------------------------------------------------------------------------------------------------------------------------------------------------------------------------------------------------------------------------|--------------------------------------------------------------------------------------------------------------------------------------------------------------------------------------------------------------------------------------------------------------|
| DEAD (Asp-Glu-Ala-Asp) box polypeptide 27           | Ddx27         | NP_694705    | 86       | 1             | nucleus                                                                                                   | ATP binding, ATP-dependent helicase activity, helicase activity, hydrolase activity, nucleic acid binding, nucleotide binding                                                                                                                                           | not classified                                                                                                                                                                                                                                               |
| hypothetical protein LOC224904                      | 2410015M20Rik | NP_694792    | 13       | 1             | not classified                                                                                            | not classified                                                                                                                                                                                                                                                          | not classified                                                                                                                                                                                                                                               |
| angiominin                                          | Amot          | NP_695231    | 95       | 1             | cell junction, endocytic vesicle, external side of plasma membrane, lamellipodium, ruffle, tight junction | receptor activity                                                                                                                                                                                                                                                       | cell migration involved in gastrulation, chemotaxis, gastrulation with mouth forming second, in utero embryonic development, negative regulation of angiogenesis, positive regulation of embryonic development, regulation of cell migration, vasculogenesis |
| pleckstrin homology-like domain, family B, member 2 | Phldb2        | NP_700461    | 141      | 1             | cytoplasm, membrane                                                                                       | not classified                                                                                                                                                                                                                                                          | not classified                                                                                                                                                                                                                                               |
| coiled-coil domain containing 65                    | Ccdc65        | NP_705738    | 58       | 1             | not classified                                                                                            | not classified                                                                                                                                                                                                                                                          | not classified                                                                                                                                                                                                                                               |
| aldehyde dehydrogenase 1 family, member L2          | Aldh1l2       | NP_705771    | 102      | 1             | cytoplasm                                                                                                 | acyl carrier activity, formyltetrahydrofolate dehydrogenase activity, hydroxymethyl-, formyl- and related transferase activity, methyltransferase activity, oxidoreductase activity, phosphopantetheine binding                                                         | 10-formyltetrahydrofolate catabolic process, biosynthetic process, metabolic process, one-carbon metabolic process, oxidation reduction                                                                                                                      |
| pyrroline-5-carboxylate synthetase isoform 2        | Aldh18a1      | NP_705782    | 87       | 1             | cytoplasm, membrane, mitochondrial inner membrane, mitochondrion                                          | ATP binding, catalytic activity, glutamate 5-kinase activity, glutamate 5-semialdehyde dehydrogenase activity, kinase activity, nucleotide binding, oxidoreductase activity, transferase activity                                                                       | cellular amino acid biosynthetic process, metabolic process, oxidation reduction, proline biosynthetic process                                                                                                                                               |
| centaurin, beta 1                                   | Centb1        | NP_722483    | 82       | 1             | cellular_component                                                                                        | ARF GTPase activator activity, ATP binding, hydrolase activity, kinase activity, metal ion binding, molecular_function, nucleotide binding, phospholipase C activity, protein tyrosine kinase activity, receptor activity, signal transducer activity, zinc ion binding | biological_process, intracellular signaling cascade, lipid catabolic process, lipid metabolic process, regulation of ARF GTPase activity, signal transduction                                                                                                |
| protein kinase N3                                   | Pkn3          | NP_722500    | 98       | 1             | cytoplasm, intracellular, nucleus                                                                         | ATP binding, kinase activity, nucleotide binding, protein kinase activity, protein kinase C activity, protein serine/threonine kinase activity, transferase activity                                                                                                    | protein amino acid phosphorylation, signal transduction                                                                                                                                                                                                      |
| Myc-binding protein-associated protein              | Mycbpap       | NP_733771    | 82       | 1             | cytoplasm, membrane                                                                                       | protein binding                                                                                                                                                                                                                                                         | cell differentiation, multicellular organismal development, spermatogenesis                                                                                                                                                                                  |

| Protein Name                                                                                 | Gene Name | Accession No | Mw (kDa) | Peptide Count | GO Component                                                                                                                                                                                                                                                             | GO Function                                                                                                                                                           | GO Process                                                                                                                                                                                                                                                                                                                                                                                                                                    |
|----------------------------------------------------------------------------------------------|-----------|--------------|----------|---------------|--------------------------------------------------------------------------------------------------------------------------------------------------------------------------------------------------------------------------------------------------------------------------|-----------------------------------------------------------------------------------------------------------------------------------------------------------------------|-----------------------------------------------------------------------------------------------------------------------------------------------------------------------------------------------------------------------------------------------------------------------------------------------------------------------------------------------------------------------------------------------------------------------------------------------|
| a disintegrin-like and metalloprotease (repolysin type) with thrombospondin type 1 motif, 16 | Adamts16  | NP_742050    | 136      | 1             | cellular_component, extracellular matrix, extracellular region, proteinaceous extracellular matrix                                                                                                                                                                       | hydrolase activity, metal ion binding, metalloendopeptidase activity, metallopeptidase activity, molecular_function, peptidase activity, zinc ion binding             | biological_process, proteolysis                                                                                                                                                                                                                                                                                                                                                                                                               |
| vacuolar protein sorting 18                                                                  | Vps18     | NP_758473    | 110      | 1             | actin filament, early endosome, endosome, lysosome, membrane                                                                                                                                                                                                             | actin binding, metal ion binding, protein binding, zinc ion binding                                                                                                   | endosome organization, protein transport, transport                                                                                                                                                                                                                                                                                                                                                                                           |
| fucokinase isoform 1                                                                         | Fuk       | NP_758487    | 119      | 1             | not classified                                                                                                                                                                                                                                                           | ATP binding, fucokinase activity, kinase activity, nucleotide binding, transferase activity                                                                           | not classified                                                                                                                                                                                                                                                                                                                                                                                                                                |
| doublesex and mab-3 related transcription factor like family A2                              | Dmrt2     | NP_758500    | 53       | 1             | cellular_component, nucleus                                                                                                                                                                                                                                              | DNA binding, metal ion binding, molecular_function, transcription factor activity, zinc ion binding                                                                   | biological_process, regulation of transcription, DNA-dependent, sex differentiation                                                                                                                                                                                                                                                                                                                                                           |
| FAST kinase domains 2                                                                        | Fastkd2   | NP_766010    | 79       | 1             | not classified                                                                                                                                                                                                                                                           | ATP binding, protein kinase activity                                                                                                                                  | apoptosis                                                                                                                                                                                                                                                                                                                                                                                                                                     |
| shroom family member 2                                                                       | Shroom2   | NP_766029    | 165      | 1             | apical junction complex, apical plasma membrane, cell cortex, cell junction, cell soma, cell-cell adherens junction, cell-cell junction, cortical actin cytoskeleton, cytoplasm, cytoskeleton, filamentous actin, membrane, microtubule, plasma membrane, tight junction | actin binding, actin filament binding, beta-catenin binding, protein binding, protein domain specific binding                                                         | actin filament bundle formation, apical protein localization, brain development, cell migration, cell morphogenesis, cell-cell junction maintenance, cellular pigment accumulation, ear development, establishment of melanosome localization, eye pigment granule organization, lens morphogenesis in camera-type eye, melanosome organization, multicellular organismal development, negative regulation of actin filament depolymerization |
| a disintegrin-like and metalloprotease (repolysin type) with thrombospondin type 1 motif, 18 | Adamts18  | NP_766054    | 135      | 1             | extracellular matrix, extracellular region, proteinaceous extracellular matrix                                                                                                                                                                                           | hydrolase activity, metal ion binding, metalloendopeptidase activity, metallopeptidase activity, peptidase activity, zinc ion binding                                 | proteolysis                                                                                                                                                                                                                                                                                                                                                                                                                                   |
| nuclear receptor coactivator 7 isoform 1                                                     | Ncoa7     | NP_766083    | 106      | 1             | nucleus                                                                                                                                                                                                                                                                  | not classified                                                                                                                                                        | cell wall macromolecule catabolic process, regulation of transcription, transcription                                                                                                                                                                                                                                                                                                                                                         |
| Rho GTPase activating protein 29                                                             | Arhgap29  | NP_766113    | 142      | 1             | intracellular                                                                                                                                                                                                                                                            | diacylglycerol binding, GTPase activator activity, metal ion binding, zinc ion binding                                                                                | intracellular signaling cascade, signal transduction                                                                                                                                                                                                                                                                                                                                                                                          |
| RUN domain containing 1                                                                      | Rundc1    | NP_766154    | 68       | 1             | not classified                                                                                                                                                                                                                                                           | not classified                                                                                                                                                        | not classified                                                                                                                                                                                                                                                                                                                                                                                                                                |
| signal-induced proliferation-associated 1 like 1                                             | Sipa111   | NP_766167    | 197      | 1             | intracellular                                                                                                                                                                                                                                                            | GTPase activator activity, protein binding                                                                                                                            | regulation of small GTPase mediated signal transduction                                                                                                                                                                                                                                                                                                                                                                                       |
| DEAH (Asp-Glu-Ala-His) box polypeptide 29                                                    | Dhx29     | NP_766182    | 154      | 1             | cytoplasm                                                                                                                                                                                                                                                                | ATP binding, ATP-dependent helicase activity, helicase activity, hydrolase activity, nucleic acid binding, nucleotide binding, translation initiation factor activity | translation                                                                                                                                                                                                                                                                                                                                                                                                                                   |

| Protein Name                                                  | Gene Name     | Accession No | Mw (kDa) | Peptide Count | GO Component                                                                                              | GO Function                                                                                                                                                                                                                | GO Process                                                                                                         |
|---------------------------------------------------------------|---------------|--------------|----------|---------------|-----------------------------------------------------------------------------------------------------------|----------------------------------------------------------------------------------------------------------------------------------------------------------------------------------------------------------------------------|--------------------------------------------------------------------------------------------------------------------|
| SEC24 related gene family, member C                           | Sec24c        | NP_766184    | 119      | 1             | not classified                                                                                            | not classified                                                                                                                                                                                                             | protein transport, transport                                                                                       |
| translocase of outer mitochondrial membrane 22 homolog        | Tomm22        | NP_766197    | 16       | 1             | integral to membrane, membrane, mitochondrial inner membrane, mitochondrial outer membrane, mitochondrion | receptor activity                                                                                                                                                                                                          | protein transport, transmembrane transport, transport                                                              |
| geranylgeranyltransferase type I                              | Pggt1b        | NP_766215    | 42       | 1             | not classified                                                                                            | CAAX-protein geranylgeranyltransferase activity, catalytic activity, metal ion binding, prenyltransferase activity, transferase activity, zinc ion binding                                                                 | not classified                                                                                                     |
| alkyldihydroxyacetone phosphate synthase                      | Agps          | NP_766254    | 72       | 1             | peroxisome                                                                                                | alkylglycerone-phosphate synthase activity, catalytic activity, FAD binding, oxidoreductase activity, transferase activity                                                                                                 | lipid biosynthetic process                                                                                         |
| glucosidase, alpha; neutral C                                 | Ganc          | NP_766260    | 104      | 1             | cellular_component                                                                                        | alpha-glucosidase activity, hydrolase activity, hydrolase activity, acting on glycosyl bonds, hydrolase activity, hydrolyzing O-glycosyl compounds                                                                         | carbohydrate metabolic process, glucose metabolic process, metabolic process                                       |
| coenzyme Q3 homolog, methyltransferase                        | Coq3          | NP_766275    | 41       | 1             | mitochondrion                                                                                             | 2-polyprenyl-6-methoxy-1,4-benzoquinone methyltransferase activity, hexaprenyldihydroxybenzoate methyltransferase activity, methyltransferase activity, transferase activity                                               | metabolic process, ubiquinone biosynthetic process                                                                 |
| InaD-like isoform 1                                           | Inadl         | NP_766284    | 199      | 1             | apical part of cell, cell junction, cytoplasm, membrane, plasma membrane, tight junction                  | protein binding                                                                                                                                                                                                            | not classified                                                                                                     |
| leukocyte receptor cluster (LRC) member 8                     | Leng8         | NP_766324    | 87       | 1             | not classified                                                                                            | not classified                                                                                                                                                                                                             | not classified                                                                                                     |
| pleckstrin homology domain containing, family A member 7      | Plekha7       | NP_766331    | 117      | 1             | not classified                                                                                            | protein binding                                                                                                                                                                                                            | not classified                                                                                                     |
| guanylate binding protein family, member 6                    | BC057170      | NP_766365    | 71       | 1             | not classified                                                                                            | not classified                                                                                                                                                                                                             | not classified                                                                                                     |
| contactin associated protein-like 5                           | C230078M14Rik | NP_766439    | 144      | 1             | integral to membrane, membrane                                                                            | protein binding, receptor binding                                                                                                                                                                                          | cell adhesion, signal transduction                                                                                 |
| WD repeat and FYVE domain containing 3                        | Wdfy3         | NP_766470    | 392      | 1             | autophagic vacuole, cytoplasm, cytoplasmic part, extrinsic to membrane, membrane, nuclear envelope        | beta-N-acetylglucosaminylglycopeptide beta-1,4-galactosyltransferase activity, metal ion binding, phosphatidylinositol binding, transferase activity, transferase activity, transferring glycosyl groups, zinc ion binding | not classified                                                                                                     |
| SNF2 histone linker PHD RING helicase isoform b               | Shprh         | NP_766525    | 185      | 1             | nucleosome, nucleus                                                                                       | ATP binding, DNA binding, helicase activity, hydrolase activity, ligase activity, metal ion binding, nucleic acid binding, nucleotide binding, protein binding, zinc ion binding                                           | DNA repair, modification-dependent protein catabolic process, nucleosome assembly, response to DNA damage stimulus |
| serine (or cysteine) proteinase inhibitor, clade B, member 1b | Serpib1b      | NP_766640    | 43       | 1             | cellular_component, cytoplasm                                                                             | peptidase inhibitor activity, serine-type endopeptidase inhibitor activity                                                                                                                                                 | regulation of protein catabolic process                                                                            |



| Protein Name                                                 | Gene Name      | Accession No | Mw (kDa) | Peptide Count | GO Component                                                                           | GO Function                                                                                                                                               | GO Process                                                                                                                                                                                                                                                                                                                                                                                                                                                                                                                                                                                                                                    |
|--------------------------------------------------------------|----------------|--------------|----------|---------------|----------------------------------------------------------------------------------------|-----------------------------------------------------------------------------------------------------------------------------------------------------------|-----------------------------------------------------------------------------------------------------------------------------------------------------------------------------------------------------------------------------------------------------------------------------------------------------------------------------------------------------------------------------------------------------------------------------------------------------------------------------------------------------------------------------------------------------------------------------------------------------------------------------------------------|
| peptidase (mitochondrial processing) alpha                   | Pmpca          | NP_775272    | 58       | 1             | mitochondrion                                                                          | catalytic activity, hydrolase activity, metal ion binding, metalloendopeptidase activity, metallopeptidase activity, peptidase activity, zinc ion binding | proteolysis                                                                                                                                                                                                                                                                                                                                                                                                                                                                                                                                                                                                                                   |
| hypothetical protein LOC67306                                | 3110050N22 Rik | NP_775273    | 35       | 1             | not classified                                                                         | not classified                                                                                                                                            | not classified                                                                                                                                                                                                                                                                                                                                                                                                                                                                                                                                                                                                                                |
| hypothetical protein LOC227446                               | 2310035C23 Rik | NP_775279    | 135      | 1             | not classified                                                                         | binding                                                                                                                                                   | not classified                                                                                                                                                                                                                                                                                                                                                                                                                                                                                                                                                                                                                                |
| PRUNEM1                                                      | Prune          | NP_775482    | 50       | 1             | cell junction, cytoplasm, nucleus                                                      | hydrolase activity, inorganic diphosphatase activity, manganese ion binding, metal ion binding, pyrophosphatase activity                                  | not classified                                                                                                                                                                                                                                                                                                                                                                                                                                                                                                                                                                                                                                |
| zinc finger protein 445                                      | Zfp445         | NP_775540    | 115      | 1             | intracellular, nucleus                                                                 | DNA binding, metal ion binding, nucleic acid binding, transcription factor activity, zinc ion binding                                                     | regulation of transcription, regulation of transcription, DNA-dependent, transcription                                                                                                                                                                                                                                                                                                                                                                                                                                                                                                                                                        |
| zinc finger, FYVE domain containing 16                       | Zfyve16        | NP_775568    | 167      | 1             | cytoplasm, endosome, membrane                                                          | metal ion binding, zinc ion binding                                                                                                                       | not classified                                                                                                                                                                                                                                                                                                                                                                                                                                                                                                                                                                                                                                |
| X Kell blood group precursor related family member 6 homolog | Xkr6           | NP_775569    | 42       | 1             | not classified                                                                         | not classified                                                                                                                                            | not classified                                                                                                                                                                                                                                                                                                                                                                                                                                                                                                                                                                                                                                |
| RAB8B, member RAS oncogene family                            | Rab8b          | NP_775589    | 24       | 1             | membrane, plasma membrane                                                              | GTP binding, nucleotide binding, protein binding                                                                                                          | protein transport, small GTPase mediated signal transduction, transport                                                                                                                                                                                                                                                                                                                                                                                                                                                                                                                                                                       |
| Rpgrip1-like                                                 | Rpgrip1l       | NP_775607    | 145      | 1             | cell projection, centrosome, cilium, cilium axoneme, cytoplasm, microtubule basal body | not classified                                                                                                                                            | brain development, camera-type eye development, cerebellum development, cilium assembly, corpus callosum development, determination of left/right symmetry, embryonic forelimb morphogenesis, embryonic hindlimb morphogenesis, in utero embryonic development, kidney development, lateral ventricle development, limb morphogenesis, liver development, neural tube patterning, nose development, olfactory bulb development, pericardium development, regulation of smoothed signaling pathway, specification of segmental identity, mandibular segment, specification of segmental identity, maxillary segment, telencephalon development |
| neurobeachin like 1                                          | Nbeal1         | NP_775620    | 306      | 1             | not classified                                                                         | not classified                                                                                                                                            | not classified                                                                                                                                                                                                                                                                                                                                                                                                                                                                                                                                                                                                                                |
| ubiquitin specific protease 43                               | Usp43          | NP_776115    | 124      | 1             | not classified                                                                         | cysteine-type peptidase activity, hydrolase activity, peptidase activity, ubiquitin thiolesterase activity                                                | modification-dependent protein catabolic process, ubiquitin-dependent protein catabolic process                                                                                                                                                                                                                                                                                                                                                                                                                                                                                                                                               |

| Protein Name                                                       | Gene Name      | Accession No | Mw (kDa) | Peptide Count | GO Component                                                                                                            | GO Function                                                                                                                                                                                                                                                                                                       | GO Process                                                                                                                                                                                                                                                                                                                                                                                                                                                                                         |
|--------------------------------------------------------------------|----------------|--------------|----------|---------------|-------------------------------------------------------------------------------------------------------------------------|-------------------------------------------------------------------------------------------------------------------------------------------------------------------------------------------------------------------------------------------------------------------------------------------------------------------|----------------------------------------------------------------------------------------------------------------------------------------------------------------------------------------------------------------------------------------------------------------------------------------------------------------------------------------------------------------------------------------------------------------------------------------------------------------------------------------------------|
| histidine acid phosphatase domain containing 1                     | Hisppd1        | NP_776121    | 128      | 1             | cytoplasm                                                                                                               | acid phosphatase activity, ATP binding, diphosphoinositol-pentakisphosphate kinase activity, kinase activity, nucleotide binding, transferase activity                                                                                                                                                            | not classified                                                                                                                                                                                                                                                                                                                                                                                                                                                                                     |
| centromere protein E                                               | Cenpe          | NP_776123    | 286      | 1             | chromosome, centromeric region                                                                                          | ATP binding, kinetochore binding, microtubule motor activity, motor activity, nucleotide binding, protein binding, protein kinase binding                                                                                                                                                                         | attachment of spindle microtubules to kinetochore, cell cycle, cell division, establishment of protein localization, microtubule-based movement, mitosis, mitotic cell cycle spindle assembly checkpoint, multicellular organismal development, positive regulation of attachment of spindle microtubules to kinetochore, positive regulation of mitotic metaphase/anaphase transition, positive regulation of protein kinase activity, regulation of developmental process, regulation of mitosis |
| cysteine conjugate-beta lyase 2                                    | Ccbl2          | NP_776124    | 47       | 1             | not classified                                                                                                          | 1-aminocyclopropane-1-carboxylate synthase activity, catalytic activity, cysteine-S-conjugate beta-lyase activity, kynurenine-oxoglutarate transaminase activity, lyase activity, pyridoxal phosphate binding, transaminase activity, transferase activity, transferase activity, transferring nitrogenous groups | biosynthetic process                                                                                                                                                                                                                                                                                                                                                                                                                                                                               |
| hypothetical protein LOC207781                                     | 5830404H04 Rik | NP_777272    | 77       | 1             | not classified                                                                                                          | not classified                                                                                                                                                                                                                                                                                                    | not classified                                                                                                                                                                                                                                                                                                                                                                                                                                                                                     |
| phosphoglucomutase 5                                               | Pgm5           | NP_778178    | 62       | 1             | cell junction, cell-cell adherens junction, cell-substrate junction, dystrophin-associated glycoprotein complex, Z disc | intramolecular transferase activity, phosphotransferases, magnesium ion binding, metal ion binding, phosphoglucomutase activity, protein binding, serine-type endopeptidase activity                                                                                                                              | carbohydrate metabolic process, cell adhesion, glucose metabolic process, proteolysis                                                                                                                                                                                                                                                                                                                                                                                                              |
| solute carrier family 38, member 2                                 | Slc38a2        | NP_780330    | 56       | 1             | integral to membrane, membrane, plasma membrane                                                                         | amino acid transmembrane transporter activity, sodium ion binding, symporter activity                                                                                                                                                                                                                             | amino acid transport, ion transport, sodium ion transport, transport                                                                                                                                                                                                                                                                                                                                                                                                                               |
| transient receptor potential cation channel, subfamily M, member 4 | Trpm4          | NP_780339    | 136      | 1             | integral to membrane, membrane, plasma membrane                                                                         | ATP binding, calcium activated cation channel activity, calcium channel activity, calcium ion binding, calmodulin binding, ion channel activity, nucleotide binding, voltage-gated ion channel activity                                                                                                           | calcium ion transport, immune response, ion transport, regulation of membrane potential, transport                                                                                                                                                                                                                                                                                                                                                                                                 |

| Protein Name                                 | Gene Name     | Accession No | Mw (kDa) | Peptide Count | GO Component                                                                      | GO Function                                                                                                                                                                                   | GO Process                                                                                                                                                                  |
|----------------------------------------------|---------------|--------------|----------|---------------|-----------------------------------------------------------------------------------|-----------------------------------------------------------------------------------------------------------------------------------------------------------------------------------------------|-----------------------------------------------------------------------------------------------------------------------------------------------------------------------------|
| galactokinase 2                              | Galk2         | NP_780363    | 49       | 1             | cytoplasm                                                                         | ATP binding, galactokinase activity, kinase activity, N-acetylgalactosamine kinase activity, nucleotide binding, phosphotransferase activity, alcohol group as acceptor, transferase activity | carbohydrate phosphorylation, galactose metabolic process, metabolic process, phosphorylation                                                                               |
| hypothetical protein LOC71653 isoform 2      | 4930506M07Rik | NP_780381    | 53       | 1             | cell projection, growth cone                                                      | molecular_function                                                                                                                                                                            | membrane depolarization, multicellular organismal development                                                                                                               |
| serine/arginine repetitive matrix 2          | Srrm2         | NP_780438    | 284      | 1             | nucleus, spliceosomal complex                                                     | not classified                                                                                                                                                                                | mRNA processing, RNA splicing                                                                                                                                               |
| formin homology 2 domain containing 3        | Fhod3         | NP_780485    | 176      | 1             | cytoplasm, cytoskeleton                                                           | actin binding                                                                                                                                                                                 | actin cytoskeleton organization, cellular component organization                                                                                                            |
| solute carrier family 25, member 41          | Slc25a41      | NP_780542    | 35       | 1             | integral to membrane, membrane, mitochondrial inner membrane, mitochondrion       | binding, transporter activity                                                                                                                                                                 | transport                                                                                                                                                                   |
| myosin binding protein C, slow type          | 8030451F13Rik | NP_780627    | 126      | 1             | cytoskeleton                                                                      | structural constituent of cytoskeleton                                                                                                                                                        | muscle contraction                                                                                                                                                          |
| ARP5 actin-related protein 5 homolog         | Actr5         | NP_780628    | 68       | 1             | cellular_component                                                                | ATP binding, molecular_function, protein binding                                                                                                                                              | biological_process, regulation of transcription, transcription                                                                                                              |
| plakophilin 4 isoform 2                      | Pkp4          | NP_780673    | 127      | 1             | cell junction                                                                     | binding, protein binding                                                                                                                                                                      | cell adhesion                                                                                                                                                               |
| zinc finger, CCHC domain containing 11       | Zcchc11       | NP_780681    | 185      | 1             | cytoplasm, nucleus                                                                | protein binding                                                                                                                                                                               | cytokine production, negative regulation of NF-kappaB transcription factor activity, regulation of lipopolysaccharide-mediated signaling pathway                            |
| actin, beta-like 2                           | Actbl2        | NP_780706    | 42       | 1             | cytoplasm, cytoskeleton                                                           | ATP binding, nucleotide binding, protein binding                                                                                                                                              | not classified                                                                                                                                                              |
| PDZ domain containing 6                      | Intu          | NP_780724    | 105      | 1             | not classified                                                                    | not classified                                                                                                                                                                                | not classified                                                                                                                                                              |
| F-box protein 46                             | Fbxo46        | NP_780739    | 65       | 1             | not classified                                                                    | not classified                                                                                                                                                                                | modification-dependent protein catabolic process                                                                                                                            |
| FCH and double SH3 domains 1                 | Fchs1         | NP_783615    | 76       | 1             | not classified                                                                    | not classified                                                                                                                                                                                | not classified                                                                                                                                                              |
| hypothetical protein LOC319352               | C530028O21Rik | NP_783627    | 30       | 1             | integral to membrane, membrane                                                    | not classified                                                                                                                                                                                | not classified                                                                                                                                                              |
| RNA binding motif protein 35b                | Rbm35b        | NP_789808    | 77       | 1             | nucleus                                                                           | nucleic acid binding, nucleotide binding, RNA binding                                                                                                                                         | mRNA processing, RNA splicing                                                                                                                                               |
| coiled coil domain containing 88A            | Ccdc88a       | NP_789811    | 212      | 1             | cell projection, cytoplasm, cytoplasmic vesicle, membrane, plasma membrane        | microtubule binding, protein kinase B binding                                                                                                                                                 | activation of protein kinase B activity, DNA replication, regulation of cell proliferation, regulation of DNA replication, regulation of protein amino acid phosphorylation |
| 5'-nucleotidase, cytosolic II-like 1 protein | Nt5dc1        | NP_795942    | 53       | 1             | not classified                                                                    | hydrolase activity, magnesium ion binding, metal ion binding                                                                                                                                  | not classified                                                                                                                                                              |
| centromere protein T                         | Cenpt         | NP_796124    | 56       | 1             | chromosome, chromosome, centromeric region, nucleus                               | not classified                                                                                                                                                                                | not classified                                                                                                                                                              |
| serine protease Desc4                        | 9930032O22Rik | NP_796136    | 47       | 1             | extracellular region, integral to membrane, integral to plasma membrane, membrane | hydrolase activity, peptidase activity, serine-type endopeptidase activity, serine-type peptidase activity                                                                                    | proteolysis                                                                                                                                                                 |
| synaptonemal complex protein 2               | Sycp2         | NP_796165    | 172      | 1             | lateral element, nucleus, synaptonemal complex                                    | DNA binding, protein binding, protein heterodimerization activity                                                                                                                             | apoptosis, cell cycle, cell division, female meiosis, fertilization, male genitalia morphogenesis, male meiosis, meiosis, organ morphogenesis                               |

| Protein Name                                                                      | Gene Name      | Accession No | Mw (kDa) | Peptide Count | GO Component                                                                | GO Function                                                                                                                                                                                                                                                                                                                      | GO Process                                                                                                                                                                                                                            |
|-----------------------------------------------------------------------------------|----------------|--------------|----------|---------------|-----------------------------------------------------------------------------|----------------------------------------------------------------------------------------------------------------------------------------------------------------------------------------------------------------------------------------------------------------------------------------------------------------------------------|---------------------------------------------------------------------------------------------------------------------------------------------------------------------------------------------------------------------------------------|
| testis flippase                                                                   | 4930417M19 Rik | NP_796169    | 136      | 1             | integral to membrane, membrane                                              | ATP binding, ATPase activity, coupled to transmembrane movement of ions, phosphorylative mechanism, hydrolase activity, hydrolase activity, acting on acid anhydrides, catalyzing transmembrane movement of substances, magnesium ion binding, metal ion binding, nucleotide binding, phospholipid-translocating ATPase activity | ATP biosynthetic process, phospholipid transport                                                                                                                                                                                      |
| leucine rich repeat neuronal 4                                                    | Lrrn4          | NP_796277    | 80       | 1             | integral to membrane, membrane                                              | protein binding                                                                                                                                                                                                                                                                                                                  | not classified                                                                                                                                                                                                                        |
| phosphoinositide-3-kinase, regulatory subunit 5, p101                             | Pik3r5         | NP_796294    | 97       | 1             | cytoplasm, membrane, nucleus                                                | kinase activity                                                                                                                                                                                                                                                                                                                  | not classified                                                                                                                                                                                                                        |
| myotubularin related protein 9                                                    | Mtmr9          | NP_808262    | 63       | 1             | cytoplasm                                                                   | enzyme regulator activity, phosphatase activity, protein binding                                                                                                                                                                                                                                                                 | dephosphorylation                                                                                                                                                                                                                     |
| dual oxidase 2                                                                    | Duox2          | NP_808278    | 172      | 1             | integral to membrane, membrane                                              | calcium ion binding, oxidoreductase activity                                                                                                                                                                                                                                                                                     | adenohypophysis morphogenesis, bone mineralization, fertilization, hormone metabolic process, inner ear development, multicellular organism growth, oxidation reduction, thyroid gland development, thyroid hormone metabolic process |
| hypothetical protein LOC228850                                                    | B230339M05 Rik | NP_808326    | 166      | 1             | intracellular                                                               | GTPase activator activity                                                                                                                                                                                                                                                                                                        | regulation of small GTPase mediated signal transduction                                                                                                                                                                               |
| tumor suppressor candidate 5                                                      | Tusc5          | NP_808377    | 19       | 1             | integral to membrane, membrane                                              | not classified                                                                                                                                                                                                                                                                                                                   | response to biotic stimulus                                                                                                                                                                                                           |
| killer cell immunoglobulin-like receptor, three domains, long cytoplasmic tail, 1 | Kir3dl1        | NP_808417    | 46       | 1             | integral to membrane, membrane, plasma membrane                             | receptor activity                                                                                                                                                                                                                                                                                                                | not classified                                                                                                                                                                                                                        |
| dedicator of cytokinesis 5                                                        | Dock5          | NP_808448    | 214      | 1             | cellular_component, cytoplasm                                               | guanyl-nucleotide exchange factor activity, molecular_function                                                                                                                                                                                                                                                                   | biological_process                                                                                                                                                                                                                    |
| transmembrane protein 67                                                          | Tmem67         | NP_808529    | 112      | 1             | integral to membrane, membrane, plasma membrane                             | not classified                                                                                                                                                                                                                                                                                                                   | not classified                                                                                                                                                                                                                        |
| Fras1 related extracellular matrix protein 1                                      | Frem1          | NP_808531    | 245      | 1             | basement membrane, extracellular region, proteinaceous extracellular matrix | binding, calcium ion binding, metal ion binding, protein binding, sugar binding                                                                                                                                                                                                                                                  | cell adhesion, cell-matrix adhesion, multicellular organismal development                                                                                                                                                             |
| hypothetical protein LOC330361                                                    | AW146020       | NP_808552    | 87       | 1             | nucleus                                                                     | DNA binding, transcription factor activity                                                                                                                                                                                                                                                                                       | regulation of transcription, transcription                                                                                                                                                                                            |
| piwi-like 4                                                                       | Piwi4          | NP_808573    | 99       | 1             | cytoplasm, nucleus, P granule                                               | piRNA binding, protein binding, RNA binding                                                                                                                                                                                                                                                                                      | cell differentiation, DNA methylation during gametogenesis, gene silencing by RNA, meiosis, multicellular organismal development, piRNA metabolic process, regulation of translation, spermatogenesis                                 |
| prominin 2 isoform 2                                                              | Prom2          | NP_835148    | 55       | 1             | cell projection, cilium, integral to membrane, membrane, plasma membrane    | not classified                                                                                                                                                                                                                                                                                                                   | not classified                                                                                                                                                                                                                        |
| ADP-ribosylation factor-like 6 interacting protein 2 isoform 2                    | Arl6ip2        | NP_835151    | 47       | 1             | integral to membrane, membrane                                              | GTP binding, GTPase activity, nucleotide binding, protein binding                                                                                                                                                                                                                                                                | not classified                                                                                                                                                                                                                        |
| phosphodiesterase 4D interacting protein isoform 2                                | Pde4dip        | NP_835181    | 127      | 1             | cytoplasm, Golgi apparatus, nucleus                                         | protein binding                                                                                                                                                                                                                                                                                                                  | not classified                                                                                                                                                                                                                        |

| Protein Name                                           | Gene Name | Accession No | Mw (kDa) | Peptide Count | GO Component                                                                                                                                   | GO Function                                                                                                                                                                                                                | GO Process                                                                                                                                                                                                                                                 |
|--------------------------------------------------------|-----------|--------------|----------|---------------|------------------------------------------------------------------------------------------------------------------------------------------------|----------------------------------------------------------------------------------------------------------------------------------------------------------------------------------------------------------------------------|------------------------------------------------------------------------------------------------------------------------------------------------------------------------------------------------------------------------------------------------------------|
| AMP-activated protein kinase alpha 2 catalytic subunit | Prkaa2    | NP_835279    | 62       | 1             | nucleus                                                                                                                                        | AMP-activated protein kinase activity, ATP binding, kinase activity, magnesium ion binding, metal ion binding, nucleotide binding, protein kinase activity, protein serine/threonine kinase activity, transferase activity | cholesterol biosynthetic process, fatty acid biosynthetic process, lipid biosynthetic process, protein amino acid phosphorylation, response to stress, steroid biosynthetic process, sterol biosynthetic process                                           |
| sorting nexin 26                                       | Snx26     | NP_839983    | 140      | 1             | cytoplasm, intracellular, membrane, plasma membrane                                                                                            | GTPase activator activity, protein binding, Rac GTPase activator activity, Rho GTPase activator activity                                                                                                                   | protein transport, signal transduction, transport                                                                                                                                                                                                          |
| DEAH (Asp-Glu-Ala-His) box polypeptide 33              | Dhx33     | NP_848144    | 78       | 1             | nucleus                                                                                                                                        | ATP binding, ATP-dependent helicase activity, helicase activity, hydrolase activity, nucleic acid binding, nucleotide binding                                                                                              | not classified                                                                                                                                                                                                                                             |
| myosin IG                                              | Myo1g     | NP_848534    | 117      | 1             | myosin complex                                                                                                                                 | actin binding, ATP binding, calmodulin binding, motor activity, nucleotide binding                                                                                                                                         | not classified                                                                                                                                                                                                                                             |
| proteasome 26S non-ATPase subunit 11                   | Psmd11    | NP_848731    | 47       | 1             | proteasome complex                                                                                                                             | not classified                                                                                                                                                                                                             | not classified                                                                                                                                                                                                                                             |
| solute carrier family 30 (zinc transporter), member 9  | Slc30a9   | NP_848766    | 63       | 1             | cytoplasm, integral to membrane, membrane, nucleus                                                                                             | cation transmembrane transporter activity, molecular_function, zinc ion binding                                                                                                                                            | biological_process, cation transport, ion transport, regulation of transcription, transcription, transport, zinc ion transport                                                                                                                             |
| ataxia, cerebellar, Cayman type homolog                | Atcay     | NP_848777    | 42       | 1             | not classified                                                                                                                                 | not classified                                                                                                                                                                                                             | transport                                                                                                                                                                                                                                                  |
| coiled-coil domain containing 100                      | Ccdc100   | NP_848801    | 113      | 1             | centrosome                                                                                                                                     | protein binding, protein C terminus binding                                                                                                                                                                                | cell proliferation, cerebral cortex development, interkinetic nuclear migration, microtubule cytoskeleton organization, neurogenesis, regulation of microtubule-based process, regulation of protein localization, spindle astral microtubule organization |
| RAB3 GTPase activating protein subunit 1               | Rab3gap1  | NP_848805    | 110      | 1             | cytoplasm                                                                                                                                      | GTPase activator activity, Rab GTPase activator activity                                                                                                                                                                   | not classified                                                                                                                                                                                                                                             |
| zinc finger protein 592                                | Zfp592    | NP_848822    | 133      | 1             | intracellular, nucleus                                                                                                                         | DNA binding, metal ion binding, protein binding, zinc ion binding                                                                                                                                                          | regulation of transcription, transcription                                                                                                                                                                                                                 |
| aldehyde dehydrogenase 8 family, member A1             | Aldh8a1   | NP_848828    | 54       | 1             | cellular_component, cytoplasm                                                                                                                  | oxidoreductase activity, retinal dehydrogenase activity                                                                                                                                                                    | 9-cis-retinoic acid biosynthetic process, metabolic process, oxidation reduction, retinal metabolic process                                                                                                                                                |
| kelch-like 8                                           | Klhl8     | NP_848856    | 70       | 1             | not classified                                                                                                                                 | protein binding                                                                                                                                                                                                            | not classified                                                                                                                                                                                                                                             |
| EGF-like, fibronectin type III and laminin G domains   | Egflam    | NP_848863    | 110      | 1             | basement membrane, cell junction, extracellular matrix, extracellular region, interstitial matrix, proteinaceous extracellular matrix, synapse | glycosaminoglycan binding                                                                                                                                                                                                  | extracellular matrix organization, peptide cross-linking via chondroitin 4-sulfate glycosaminoglycan, positive regulation of cell-substrate adhesion                                                                                                       |

| Protein Name                                            | Gene Name     | Accession No | Mw (kDa) | Peptide Count | GO Component                                                                                        | GO Function                                                                                                                                                                                                                                                    | GO Process                                                                                                                             |
|---------------------------------------------------------|---------------|--------------|----------|---------------|-----------------------------------------------------------------------------------------------------|----------------------------------------------------------------------------------------------------------------------------------------------------------------------------------------------------------------------------------------------------------------|----------------------------------------------------------------------------------------------------------------------------------------|
| ATP/GTP binding protein-like 2                          | Agbl2         | NP_848870    | 99       | 1             | cytoplasm                                                                                           | carboxypeptidase activity, hydrolase activity, metal ion binding, metalloprotease activity, metalloprotease activity, peptidase activity, zinc ion binding                                                                                                     | proteolysis                                                                                                                            |
| expressed sequence AI790205                             | Gpr107        | NP_848875    | 62       | 1             | integral to membrane, membrane                                                                      | receptor activity                                                                                                                                                                                                                                              | not classified                                                                                                                         |
| BCL6 co-repressor-like 1                                | Bcor1         | NP_848897    | 190      | 1             | nucleus                                                                                             | not classified                                                                                                                                                                                                                                                 | chromatin modification, regulation of transcription, transcription                                                                     |
| hypothetical protein LOC320484                          | A430107D22Rik | NP_848900    | 115      | 1             | intracellular                                                                                       | GTPase activator activity                                                                                                                                                                                                                                      | regulation of small GTPase mediated signal transduction                                                                                |
| Fanconi anemia, complementation group M                 | Fancm         | NP_849243    | 226      | 1             | nucleus                                                                                             | ATP binding, ATP-dependent helicase activity, DNA binding, helicase activity, hydrolase activity, nuclease activity, nucleic acid binding, nucleotide binding, protein binding                                                                                 | DNA metabolic process, DNA repair, response to DNA damage stimulus                                                                     |
| Kazal-type serine peptidase inhibitor domain 1          | Kazald1       | NP_849260    | 34       | 1             | extracellular matrix, extracellular region, interstitial matrix, proteinaceous extracellular matrix | insulin-like growth factor binding                                                                                                                                                                                                                             | cell differentiation, extracellular matrix organization, multicellular organismal development, ossification, regulation of cell growth |
| solute carrier family 25, member 29                     | Slc25a29      | NP_851845    | 33       | 1             | integral to membrane, membrane, mitochondrial inner membrane, mitochondrion                         | acyl carnitine transporter activity, binding, transporter activity                                                                                                                                                                                             | acyl carnitine transport, transport                                                                                                    |
| DENN/MADD domain containing 1B isoform 1                | Dennd1b       | NP_851992    | 77       | 1             | not classified                                                                                      | not classified                                                                                                                                                                                                                                                 | not classified                                                                                                                         |
| coiled-coil-helix-coiled-coil-helix domain containing 7 | Chchd7        | NP_852056    | 10       | 1             | cellular_component                                                                                  | molecular_function                                                                                                                                                                                                                                             | biological_process                                                                                                                     |
| fructosamine 3-kinase-related protein                   | BC032265      | NP_852085    | 34       | 1             | not classified                                                                                      | kinase activity, transferase activity                                                                                                                                                                                                                          | not classified                                                                                                                         |
| cDNA sequence BC022641                                  | Edc4          | NP_853625    | 151      | 1             | cytoplasm, nucleus                                                                                  | not classified                                                                                                                                                                                                                                                 | not classified                                                                                                                         |
| R3H domain (binds single-stranded nucleic acids)        | R3hdm1        | NP_861415    | 124      | 1             | not classified                                                                                      | not classified                                                                                                                                                                                                                                                 | not classified                                                                                                                         |
| hypothetical protein LOC75216                           | 4930534B04Rik | NP_861536    | 129      | 1             | not classified                                                                                      | not classified                                                                                                                                                                                                                                                 | not classified                                                                                                                         |
| structure specific recognition protein 1                | Ssrp1         | NP_892035    | 81       | 1             | chromosome, nucleus                                                                                 | DNA binding                                                                                                                                                                                                                                                    | DNA repair, DNA replication, regulation of transcription, response to DNA damage stimulus, transcription                               |
| ring finger protein 20                                  | Rnf20         | NP_892044    | 114      | 1             | cellular_component, chromosome, nucleus                                                             | ligase activity, metal ion binding, molecular_function, protein binding, zinc ion binding                                                                                                                                                                      | biological_process, chromatin modification, modification-dependent protein catabolic process                                           |
| Cdc42 binding protein kinase beta                       | Cdc42bbp      | NP_898837    | 195      | 1             | cytoplasm                                                                                           | ATP binding, diacylglycerol binding, kinase activity, magnesium ion binding, metal ion binding, nucleotide binding, protein kinase activity, protein serine/threonine kinase activity, small GTPase regulator activity, transferase activity, zinc ion binding | intracellular signaling cascade, protein amino acid phosphorylation                                                                    |
| zinc finger protein 598                                 | Zfp598        | NP_898972    | 99       | 1             | cellular_component, intracellular                                                                   | metal ion binding, molecular_function, protein binding, zinc ion binding                                                                                                                                                                                       | biological_process                                                                                                                     |
| hypothetical protein LOC242602                          | BC055111      | NP_899005    | 46       | 1             | not classified                                                                                      | not classified                                                                                                                                                                                                                                                 | not classified                                                                                                                         |
| schlafen 5                                              | Slfn5         | NP_899024    | 101      | 1             | nucleus                                                                                             | ATP binding, nucleotide binding                                                                                                                                                                                                                                | cell differentiation                                                                                                                   |

| Protein Name                                  | Gene Name     | Accession No | Mw (kDa) | Peptide Count | GO Component                                                                   | GO Function                                                                                                                                                                                                              | GO Process                                                                                                                                          |
|-----------------------------------------------|---------------|--------------|----------|---------------|--------------------------------------------------------------------------------|--------------------------------------------------------------------------------------------------------------------------------------------------------------------------------------------------------------------------|-----------------------------------------------------------------------------------------------------------------------------------------------------|
| FAT tumor suppressor homolog 4                | Fat4          | NP_899044    | 540      | 1             | integral to membrane, membrane                                                 | calcium ion binding, protein binding                                                                                                                                                                                     | cell adhesion, homophilic cell adhesion                                                                                                             |
| hypothetical protein LOC68550                 | 1110002N22Rik | NP_899098    | 42       | 1             | not classified                                                                 | not classified                                                                                                                                                                                                           | not classified                                                                                                                                      |
| phosphodiesterase 4A, cAMP specific isoform 5 | Pde4a         | NP_899668    | 94       | 1             | not classified                                                                 | 3',5'-cyclic-AMP phosphodiesterase activity, 3',5'-cyclic-nucleotide phosphodiesterase activity, catalytic activity, hydrolase activity                                                                                  | signal transduction                                                                                                                                 |
| NACHT, LRR and PYD containing protein 9b      | Nlrp9b        | NP_918947    | 115      | 1             | cytoplasm                                                                      | ATP binding, nucleotide binding, protein binding                                                                                                                                                                         | not classified                                                                                                                                      |
| A kinase (PRKA) anchor protein (yotiao) 9     | Akap9         | NP_919444    | 434      | 1             | cytoplasm, pericentriolar material                                             | kinase activity, protein binding                                                                                                                                                                                         | not classified                                                                                                                                      |
| alcohol dehydrogenase PAN1B-like              | Hsd17b13      | NP_932147    | 34       | 1             | extracellular region                                                           | binding, catalytic activity, oxidoreductase activity                                                                                                                                                                     | metabolic process, oxidation reduction                                                                                                              |
| periakin isoform L                            | Prx           | NP_932165    | 148      | 1             | cytoplasm, membrane, nucleus, plasma membrane                                  | protein binding                                                                                                                                                                                                          | not classified                                                                                                                                      |
| hypothetical protein LOC207375                | ORF34         | NP_932773    | 120      | 1             | not classified                                                                 | not classified                                                                                                                                                                                                           | not classified                                                                                                                                      |
| nucleoporin 188                               | Nup188        | NP_938046    | 197      | 1             | nuclear pore, nucleus                                                          | not classified                                                                                                                                                                                                           | mRNA transport, protein transport, transmembrane transport, transport                                                                               |
| alanyl-tRNA synthetase 2, mitochondrial       | Aars2         | NP_941010    | 107      | 1             | cellular_component, cytoplasm, mitochondrion                                   | alanine-tRNA ligase activity, aminoacyl-tRNA ligase activity, ATP binding, ligase activity, forming aminoacyl-tRNA and related compounds, molecular_function, nucleic acid binding, nucleotide binding                   | alanyl-tRNA aminoacylation, biological_process, translation, tRNA aminoacylation                                                                    |
| H1 histone family, member X                   | H1fx          | NP_941024    | 20       | 1             | chromosome, nucleus                                                            | DNA binding                                                                                                                                                                                                              | not classified                                                                                                                                      |
| hypothetical protein LOC279029                | Gm711         | NP_941030    | 75       | 1             | not classified                                                                 | ATP binding, nucleotide binding, protein kinase activity                                                                                                                                                                 | protein amino acid phosphorylation                                                                                                                  |
| actin binding LIM protein family, member 3    | Ablim3        | NP_941051    | 78       | 1             | cytoplasm                                                                      | actin binding, metal ion binding, zinc ion binding                                                                                                                                                                       | cytoskeleton organization, positive regulation of transcription from RNA polymerase II promoter                                                     |
| outer dense fiber of sperm tails 3-like 1     | Odf31l        | NP_941075    | 31       | 1             | not classified                                                                 | not classified                                                                                                                                                                                                           | not classified                                                                                                                                      |
| neuroligin 2                                  | Nlgn2         | NP_942562    | 91       | 1             | integral to membrane, membrane, synapse                                        | protein binding                                                                                                                                                                                                          | cell adhesion, regulation of respiratory gaseous exchange by neurological system process, regulation of synaptic transmission, synapse organization |
| PHD finger protein 15                         | Phf15         | NP_955003    | 92       | 1             | not classified                                                                 | metal ion binding, protein binding, zinc ion binding                                                                                                                                                                     | not classified                                                                                                                                      |
| endothelin converting enzyme 1                | Ece1          | NP_955011    | 85       | 1             | cell surface, Golgi apparatus, integral to membrane, membrane, plasma membrane | hydrolase activity, metal ion binding, metalloendopeptidase activity, metallopeptidase activity, peptidase activity, zinc ion binding                                                                                    | peptide hormone processing, pharyngeal system development, proteolysis                                                                              |
| WEE1 homolog 2                                | Wee2          | NP_958758    | 62       | 1             | nucleus                                                                        | ATP binding, kinase activity, magnesium ion binding, non-membrane spanning protein tyrosine kinase activity, nucleotide binding, protein kinase activity, protein serine/threonine kinase activity, transferase activity | mitosis, protein amino acid phosphorylation                                                                                                         |

| Protein Name                                                           | Gene Name         | Accession No | Mw (kDa) | Peptide Count | GO Component                                                                                       | GO Function                                                                                                                                                   | GO Process                                                                                                                   |
|------------------------------------------------------------------------|-------------------|--------------|----------|---------------|----------------------------------------------------------------------------------------------------|---------------------------------------------------------------------------------------------------------------------------------------------------------------|------------------------------------------------------------------------------------------------------------------------------|
| plectin 1 isoform 6                                                    | Plec1             | NP_958791    | 534      | 1             | contractile fiber, cytoplasm, cytoskeleton, insoluble fraction                                     | actin binding                                                                                                                                                 | not classified                                                                                                               |
| UDP glucuronosyltransferase 1 family, polypeptide A9                   | Ugt1a9            | NP_964006    | 60       | 1             | endoplasmic reticulum, integral to membrane, membrane, microsome                                   | glucuronosyltransferase activity, transferase activity, transferase activity, transferring glycosyl groups, transferase activity, transferring hexosyl groups | metabolic process                                                                                                            |
| interferon alpha 6T                                                    | OTTMUSG0000011275 | NP_996750    | 22       | 1             | extracellular space                                                                                | cytokine activity                                                                                                                                             | response to virus                                                                                                            |
| taste receptor, type 2, member 129                                     | Tas2r129          | NP_996912    | 37       | 1             | integral to membrane, membrane                                                                     | G-protein coupled receptor activity, receptor activity, signal transducer activity                                                                            | G-protein coupled receptor protein signaling pathway, response to stimulus, sensory perception of taste, signal transduction |
| transmembrane protein 16g                                              | Tmem16g           | NP_996914    | 97       | 1             | chloride channel complex, integral to membrane, membrane, plasma membrane                          | calcium ion binding, chloride channel activity, chloride ion binding, ion channel activity                                                                    | ion transport, transport                                                                                                     |
| hypothetical protein LOC73072                                          | BC068157          | NP_997086    | 111      | 1             | not classified                                                                                     | not classified                                                                                                                                                | not classified                                                                                                               |
| lysophosphatidylcholine acyltransferase 4                              | Lpcat4            | NP_997089    | 57       | 1             | endoplasmic reticulum, integral to membrane, membrane                                              | acyltransferase activity, transferase activity                                                                                                                | metabolic process, phospholipid biosynthetic process                                                                         |
| hypothetical protein LOC240066                                         | BC066107          | NP_997128    | 64       | 1             | nucleus                                                                                            | metal ion binding, zinc ion binding                                                                                                                           | transcription                                                                                                                |
| olfactory receptor 1051                                                | Olf1051           | NP_997445    | 35       | 1             | integral to membrane                                                                               | G-protein coupled receptor activity, olfactory receptor activity, receptor activity, signal transducer activity                                               | G-protein coupled receptor protein signaling pathway, sensory perception of smell, signal transduction                       |
| dystrobrevin alpha isoform 1                                           | Dtna              | NP_997533    | 77       | 1             | cell junction, cytoplasm, dystrobrevin complex, microsome, sarcolemma, synapse                     | calcium ion binding, metal ion binding, protein binding, zinc ion binding                                                                                     | not classified                                                                                                               |
| PREDICTED: similar to Ki-67                                            | Mki67             | XP_001000692 | 351      | 1             | chromosome, centromeric region, condensed chromosome, cytoplasm, intracellular, nucleolus, nucleus | not classified                                                                                                                                                | cell proliferation, meiosis                                                                                                  |
| PREDICTED: hypothetical protein                                        | Gm536             | XP_001001008 | 17       | 1             | not classified                                                                                     | not classified                                                                                                                                                | not classified                                                                                                               |
| PREDICTED: thyroid hormone receptor interactor 11 isoform 3            | Trip11            | XP_001001171 | 226      | 1             | not classified                                                                                     | receptor activity                                                                                                                                             | not classified                                                                                                               |
| PREDICTED: heterogeneous nuclear ribonucleoprotein A0                  | Hnrpa0            | XP_001001311 | 31       | 1             | not classified                                                                                     | not classified                                                                                                                                                | not classified                                                                                                               |
| PREDICTED: similar to KIAA1858 protein                                 | Gm22              | XP_001001798 | 335      | 1             | not classified                                                                                     | not classified                                                                                                                                                | not classified                                                                                                               |
| PREDICTED: similar to Glyceraldehyde-3-phosphate dehydrogenase (GAPDH) | EG629557          | XP_001002772 | 36       | 1             | not classified                                                                                     | not classified                                                                                                                                                | not classified                                                                                                               |
| PREDICTED: hypothetical protein LOC66808                               | 9030624G23Rik     | XP_001003228 | 18       | 1             | not classified                                                                                     | not classified                                                                                                                                                | not classified                                                                                                               |
| PREDICTED: plexin B2 isoform 14                                        | Plxbn2            | XP_001003435 | 206      | 1             | integral to membrane, membrane                                                                     | protein binding                                                                                                                                               | positive regulation of axonogenesis                                                                                          |
| PREDICTED: START domain containing 9                                   | Stard9            | XP_001004201 | 504      | 1             | microtubule                                                                                        | ATP binding, motor activity, nucleotide binding                                                                                                               | not classified                                                                                                               |
| PREDICTED: hypothetical protein isoform 1                              | LOC100044330      | XP_001472000 | 28       | 1             | not classified                                                                                     | not classified                                                                                                                                                | not classified                                                                                                               |
| PREDICTED: hypothetical protein LOC320625                              | 9330101J02Rik     | XP_001472215 | 214      | 1             | not classified                                                                                     | not classified                                                                                                                                                | not classified                                                                                                               |
| PREDICTED: hypothetical protein                                        | LOC100039079      | XP_001472265 | 11       | 1             | not classified                                                                                     | not classified                                                                                                                                                | not classified                                                                                                               |
| PREDICTED: hypothetical protein LOC78167                               | 4930439D14Rik     | XP_001472326 | 37       | 1             | not classified                                                                                     | not classified                                                                                                                                                | not classified                                                                                                               |
| PREDICTED: hypothetical protein LOC78034                               | 4930528H21Rik     | XP_001472376 | 9        | 1             | not classified                                                                                     | not classified                                                                                                                                                | not classified                                                                                                               |
| PREDICTED: hypothetical protein                                        | LOC100039184      | XP_001472463 | 4        | 1             | not classified                                                                                     | not classified                                                                                                                                                | not classified                                                                                                               |
| PREDICTED: hypothetical protein                                        | LOC100044506      | XP_001472509 | 17       | 1             | not classified                                                                                     | not classified                                                                                                                                                | not classified                                                                                                               |
| PREDICTED: hypothetical protein                                        | LOC100039211      | XP_001472511 | 15       | 1             | not classified                                                                                     | not classified                                                                                                                                                | not classified                                                                                                               |
| PREDICTED: hypothetical protein                                        | EG245516          | XP_001472556 | 94       | 1             | not classified                                                                                     | not classified                                                                                                                                                | not classified                                                                                                               |



| Protein Name                                                                         | Gene Name         | Accession No | Mw (kDa) | Peptide Count | GO Component       | GO Function                                                                                                                                                                | GO Process                         |
|--------------------------------------------------------------------------------------|-------------------|--------------|----------|---------------|--------------------|----------------------------------------------------------------------------------------------------------------------------------------------------------------------------|------------------------------------|
| PREDICTED: hypothetical protein LOC75255                                             | 4930562F07 Rik    | XP_001472732 | 14       | 1             | not classified     | not classified                                                                                                                                                             | not classified                     |
| PREDICTED: similar to SMC4 protein                                                   | LOC100044651      | XP_001472819 | 148      | 1             | not classified     | not classified                                                                                                                                                             | not classified                     |
| PREDICTED: hypothetical protein                                                      | LOC100045035      | XP_001472867 | 26       | 1             | not classified     | not classified                                                                                                                                                             | not classified                     |
| PREDICTED: similar to Copine V                                                       | LOC100048828      | XP_001472874 | 59       | 1             | not classified     | not classified                                                                                                                                                             | not classified                     |
| PREDICTED: hypothetical protein LOC70941                                             | 4921539E11 Rik    | XP_001473247 | 40       | 1             | not classified     | not classified                                                                                                                                                             | not classified                     |
| PREDICTED: hypothetical protein                                                      | LOC100039707      | XP_001473323 | 23       | 1             | not classified     | not classified                                                                                                                                                             | not classified                     |
| PREDICTED: similar to TTF-2 protein                                                  | LOC100044984      | XP_001473497 | 42       | 1             | not classified     | not classified                                                                                                                                                             | not classified                     |
| PREDICTED: hypothetical protein                                                      | LOC100039772      | XP_001473532 | 15       | 1             | not classified     | not classified                                                                                                                                                             | not classified                     |
| PREDICTED: hypothetical protein LOC78244                                             | 4930461P20 Rik    | XP_001473693 | 62       | 1             | not classified     | not classified                                                                                                                                                             | not classified                     |
| PREDICTED: similar to Ankrd12 protein                                                | LOC100043992      | XP_001473831 | 33       | 1             | not classified     | not classified                                                                                                                                                             | not classified                     |
| PREDICTED: hypothetical protein                                                      | LOC100045557      | XP_001474006 | 22       | 1             | not classified     | not classified                                                                                                                                                             | not classified                     |
| PREDICTED: hypothetical protein                                                      | LOC100040172      | XP_001474258 | 19       | 1             | not classified     | not classified                                                                                                                                                             | not classified                     |
| PREDICTED: similar to ankyrin repeat domain 29                                       | Ankrd29           | XP_001474267 | 33       | 1             | cellular_component | molecular_function                                                                                                                                                         | biological_process                 |
| PREDICTED: hypothetical protein                                                      | LOC100040405      | XP_001474680 | 39       | 1             | not classified     | not classified                                                                                                                                                             | not classified                     |
| PREDICTED: hypothetical protein                                                      | LOC100045662      | XP_001474747 | 51       | 1             | not classified     | not classified                                                                                                                                                             | not classified                     |
| PREDICTED: hypothetical protein                                                      | LOC677427         | XP_001474950 | 11       | 1             | not classified     | not classified                                                                                                                                                             | not classified                     |
| PREDICTED: similar to Traf2 and NCK interacting kinase, splice isoform 2             | Tnik              | XP_001474959 | 125      | 1             | not classified     | ATP binding, kinase activity, nucleotide binding, protein kinase activity, protein serine/threonine kinase activity, small GTPase regulator activity, transferase activity | protein amino acid phosphorylation |
| PREDICTED: hypothetical protein                                                      | LOC667147         | XP_001475011 | 30       | 1             | not classified     | not classified                                                                                                                                                             | not classified                     |
| PREDICTED: hypothetical protein                                                      | LOC100045882      | XP_001475133 | 16       | 1             | not classified     | not classified                                                                                                                                                             | not classified                     |
| PREDICTED: similar to L23 mitochondrial-related protein isoform 2                    | LOC100040519      | XP_001475261 | 17       | 1             | ribosome           | not classified                                                                                                                                                             | not classified                     |
| PREDICTED: similar to Gapdh protein                                                  | LOC100040480      | XP_001475428 | 15       | 1             | not classified     | not classified                                                                                                                                                             | not classified                     |
| PREDICTED: hypothetical protein                                                      | LOC100046043      | XP_001475508 | 28       | 1             | not classified     | not classified                                                                                                                                                             | not classified                     |
| PREDICTED: hypothetical protein                                                      | ENSMUSG0000056391 | XP_001475572 | 43       | 1             | not classified     | not classified                                                                                                                                                             | not classified                     |
| PREDICTED: similar to Translocase of outer mitochondrial membrane 20 homolog (yeast) | LOC546321         | XP_001475586 | 14       | 1             | not classified     | not classified                                                                                                                                                             | not classified                     |
| PREDICTED: similar to 40S ribosomal protein S29                                      | EG632013          | XP_001476064 | 7        | 1             | not classified     | not classified                                                                                                                                                             | not classified                     |
| PREDICTED: hypothetical protein                                                      | LOC673968         | XP_001476092 | 23       | 1             | not classified     | not classified                                                                                                                                                             | not classified                     |
| PREDICTED: similar to STAT3-interacting protein as a repressor                       | LOC434799         | XP_001476131 | 28       | 1             | not classified     | not classified                                                                                                                                                             | not classified                     |
| PREDICTED: similar to Selenoprotein K                                                | LOC100046282      | XP_001476445 | 10       | 1             | not classified     | not classified                                                                                                                                                             | not classified                     |
| PREDICTED: hypothetical protein                                                      | LOC100046662      | XP_001476788 | 13       | 1             | not classified     | not classified                                                                                                                                                             | not classified                     |
| PREDICTED: hypothetical protein                                                      | LOC100046760      | XP_001476811 | 9        | 1             | not classified     | not classified                                                                                                                                                             | not classified                     |
| PREDICTED: similar to ribosomal protein L39                                          | LOC100046220      | XP_001476878 | 8        | 1             | not classified     | not classified                                                                                                                                                             | not classified                     |
| PREDICTED: hypothetical protein                                                      | EG633285          | XP_001477109 | 60       | 1             | not classified     | not classified                                                                                                                                                             | not classified                     |
| PREDICTED: hypothetical protein LOC78147                                             | 8430439B09 Rik    | XP_001477185 | 8        | 1             | not classified     | not classified                                                                                                                                                             | not classified                     |
| PREDICTED: OTU domain containing 3                                                   | Otud3             | XP_001477778 | 50       | 1             | not classified     | not classified                                                                                                                                                             | not classified                     |
| PREDICTED: similar to cDNA sequence BC018101                                         | EG382161          | XP_001477881 | 70       | 1             | not classified     | not classified                                                                                                                                                             | not classified                     |
| PREDICTED: hypothetical protein                                                      | LOC100042323      | XP_001477991 | 11       | 1             | not classified     | not classified                                                                                                                                                             | not classified                     |
| PREDICTED: hypothetical protein                                                      | LOC100047366      | XP_001478045 | 12       | 1             | not classified     | not classified                                                                                                                                                             | not classified                     |
| PREDICTED: similar to THO complex 2                                                  | LOC100042165      | XP_001478330 | 183      | 1             | not classified     | not classified                                                                                                                                                             | not classified                     |
| PREDICTED: hypothetical protein                                                      | LOC100042273      | XP_001478355 | 17       | 1             | not classified     | not classified                                                                                                                                                             | not classified                     |
| PREDICTED: similar to olfactory receptor MOR264-3                                    | LOC100047739      | XP_001478839 | 36       | 1             | not classified     | not classified                                                                                                                                                             | not classified                     |
| PREDICTED: hypothetical protein isoform 2                                            | LOC634257         | XP_001478882 | 22       | 1             | not classified     | not classified                                                                                                                                                             | not classified                     |

| Protein Name                                                                              | Gene Name         | Accession No | Mw (kDa) | Peptide Count | GO Component                                         | GO Function                                                                                                                 | GO Process                                                                                      |
|-------------------------------------------------------------------------------------------|-------------------|--------------|----------|---------------|------------------------------------------------------|-----------------------------------------------------------------------------------------------------------------------------|-------------------------------------------------------------------------------------------------|
| PREDICTED: similar to Ezh1 protein                                                        | LOC100044129      | XP_001478998 | 85       | 1             | nucleus                                              | DNA binding, histone-lysine N-methyltransferase activity, methyltransferase activity, protein binding, transferase activity | chromatin modification, regulation of transcription, transcription                              |
| PREDICTED: hypothetical protein                                                           | LOC100047609      | XP_001479061 | 70       | 1             | not classified                                       | not classified                                                                                                              | not classified                                                                                  |
| PREDICTED: similar to RIKEN cDNA 1700022C21 gene                                          | LOC100047902      | XP_001479145 | 33       | 1             | not classified                                       | not classified                                                                                                              | not classified                                                                                  |
| PREDICTED: similar to ADIR1                                                               | LOC100047963      | XP_001479288 | 35       | 1             | not classified                                       | not classified                                                                                                              | not classified                                                                                  |
| PREDICTED: similar to olfactory receptor MOR183-2                                         | LOC100048042      | XP_001479447 | 40       | 1             | not classified                                       | not classified                                                                                                              | not classified                                                                                  |
| PREDICTED: similar to Ran-binding protein 16 isoform 3                                    | LOC100048165      | XP_001479590 | 124      | 1             | not classified                                       | not classified                                                                                                              | not classified                                                                                  |
| PREDICTED: similar to RIKEN cDNA B230315N10 gene                                          | B230315N10Rik     | XP_001479610 | 70       | 1             | nucleus                                              | metal ion binding, zinc ion binding                                                                                         | transcription                                                                                   |
| PREDICTED: similar to Eukaryotic translation initiation factor 5 isoform 2                | LOC100047658      | XP_001479649 | 49       | 1             | not classified                                       | not classified                                                                                                              | not classified                                                                                  |
| PREDICTED: similar to Cytochrome P450, family 2, subfamily a, polypeptide 12 isoform 3    | EG233005          | XP_001479661 | 50       | 1             | not classified                                       | iron ion binding, metal ion binding, monooxygenase activity, oxidoreductase activity                                        | oxidation reduction                                                                             |
| PREDICTED: similar to Mannose-P-dolichol utilization defect 1                             | LOC100048170      | XP_001479721 | 19       | 1             | not classified                                       | not classified                                                                                                              | not classified                                                                                  |
| PREDICTED: similar to UGT1.6                                                              | LOC100048293      | XP_001480001 | 33       | 1             | not classified                                       | not classified                                                                                                              | not classified                                                                                  |
| PREDICTED: hypothetical protein                                                           | LOC672884         | XP_001480393 | 136      | 1             | not classified                                       | not classified                                                                                                              | not classified                                                                                  |
| PREDICTED: hypothetical protein                                                           | LOC100048424      | XP_001480537 | 7        | 1             | not classified                                       | not classified                                                                                                              | not classified                                                                                  |
| PREDICTED: hypothetical protein                                                           | ENSMUSG0000075265 | XP_001481037 | 13       | 1             | not classified                                       | not classified                                                                                                              | not classified                                                                                  |
| PREDICTED: hypothetical protein                                                           | LOC100048769      | XP_001481256 | 41       | 1             | not classified                                       | not classified                                                                                                              | not classified                                                                                  |
| PREDICTED: similar to ubiquitin specific protease 24                                      | Usp24             | XP_001481331 | 332      | 1             | not classified                                       | cysteine-type peptidase activity, hydrolase activity, peptidase activity, ubiquitin thiolesterase activity                  | modification-dependent protein catabolic process, ubiquitin-dependent protein catabolic process |
| PREDICTED: similar to SH3 domain binding protein                                          | Wipf3             | XP_001481334 | 49       | 1             | cytoplasm                                            | actin binding                                                                                                               | cell differentiation, multicellular organismal development, spermatogenesis                     |
| PREDICTED: similar to novel KRAB box and zinc finger, C2H2 type domain containing protein | LOC436100         | XP_001481343 | 72       | 1             | not classified                                       | not classified                                                                                                              | not classified                                                                                  |
| PREDICTED: similar to FERM and PDZ domain containing 2                                    | Frmpd2            | XP_001481344 | 142      | 1             | not classified                                       | not classified                                                                                                              | not classified                                                                                  |
| PREDICTED: similar to hCG1813078                                                          | Dnahc17           | XP_001481351 | 512      | 1             | cell projection, cilium, dynein complex, microtubule | ATP binding, ATPase activity, microtubule motor activity, motor activity, nucleotide binding                                | microtubule-based movement                                                                      |
| PREDICTED: similar to very large inducible GTPase 1                                       | Gm1966            | XP_001481361 | 279      | 1             | not classified                                       | not classified                                                                                                              | not classified                                                                                  |
| PREDICTED: gene model 969, (NCBI)                                                         | Gm969             | XP_001481372 | 103      | 1             | not classified                                       | not classified                                                                                                              | not classified                                                                                  |
| PREDICTED: hypothetical protein                                                           | LOC625662         | XP_127483    | 85       | 1             | not classified                                       | not classified                                                                                                              | not classified                                                                                  |
| PREDICTED: hypothetical protein                                                           | LOC236874         | XP_135951    | 19       | 1             | not classified                                       | not classified                                                                                                              | not classified                                                                                  |
| PREDICTED: hypothetical protein                                                           | Gm221             | XP_136914    | 82       | 1             | not classified                                       | not classified                                                                                                              | not classified                                                                                  |
| PREDICTED: hypothetical protein                                                           | Heph1             | XP_146812    | 128      | 1             | integral to membrane, membrane                       | copper ion binding, metal ion binding, oxidoreductase activity                                                              | copper ion transport, ion transport, oxidation reduction, transport                             |
| PREDICTED: hypothetical protein LOC320827 isoform 1                                       | C530008M17Rik     | XP_287460    | 140      | 1             | not classified                                       | not classified                                                                                                              | not classified                                                                                  |
| PREDICTED: hypothetical protein                                                           | Gm1043            | XP_355598    | 111      | 1             | not classified                                       | not classified                                                                                                              | not classified                                                                                  |
| PREDICTED: similar to Rab5B                                                               | LOC433464         | XP_485050    | 22       | 1             | not classified                                       | not classified                                                                                                              | not classified                                                                                  |
| PREDICTED: zinc finger and BTB domain containing 10 isoform 1                             | Zbtb10            | XP_485202    | 117      | 1             | cellular_component                                   | molecular_function                                                                                                          | biological_process                                                                              |
| PREDICTED: similar to 2410089E03Rik protein                                               | EG546032          | XP_486078    | 47       | 1             | not classified                                       | not classified                                                                                                              | not classified                                                                                  |
| PREDICTED: similar to 40S ribosomal protein S14 isoform 1                                 | EG545121          | XP_619341    | 16       | 1             | not classified                                       | not classified                                                                                                              | not classified                                                                                  |
| PREDICTED: similar to 60S ribosomal protein L38                                           | EG547172          | XP_622034    | 9        | 1             | not classified                                       | not classified                                                                                                              | not classified                                                                                  |
| PREDICTED: similar to TL antigen isoform 1                                                | H2-T3-like        | XP_622848    | 43       | 1             | not classified                                       | not classified                                                                                                              | not classified                                                                                  |
| PREDICTED: similar to ribosomal protein L23a                                              | EG619734          | XP_889280    | 17       | 1             | not classified                                       | not classified                                                                                                              | not classified                                                                                  |

| Protein Name                                                                                                                                                                                                                                       | Gene Name      | Accession No | Mw (kDa) | Peptide Count | GO Component                                                                       | GO Function                                                                                                                                                                                                                                                    | GO Process                                                                                                                                                                                               |
|----------------------------------------------------------------------------------------------------------------------------------------------------------------------------------------------------------------------------------------------------|----------------|--------------|----------|---------------|------------------------------------------------------------------------------------|----------------------------------------------------------------------------------------------------------------------------------------------------------------------------------------------------------------------------------------------------------------|----------------------------------------------------------------------------------------------------------------------------------------------------------------------------------------------------------|
| PREDICTED: microtubule-actin crosslinking factor 1 isoform 2                                                                                                                                                                                       | Macf1          | XP_890015    | 839      | 1             | actin cytoskeleton, cell cortex, cytoplasm, cytoskeleton, microtubule cytoskeleton | actin binding, calcium ion binding, microtubule binding, protein binding                                                                                                                                                                                       | cell cycle arrest, cell motion, establishment or maintenance of cell polarity, mesoderm formation, posttranslational protein targeting to membrane, protein localization, Wnt receptor signaling pathway |
| PREDICTED: hypothetical protein LOC77522                                                                                                                                                                                                           | D630002J15 Rik | XP_890528    | 12       | 1             | integral to membrane, membrane                                                     | not classified                                                                                                                                                                                                                                                 | not classified                                                                                                                                                                                           |
| PREDICTED: hypothetical protein                                                                                                                                                                                                                    | EG621697       | XP_892477    | 16       | 1             | not classified                                                                     | not classified                                                                                                                                                                                                                                                 | not classified                                                                                                                                                                                           |
| PREDICTED: similar to ribosomal protein L22                                                                                                                                                                                                        | LOC623483      | XP_893035    | 35       | 1             | not classified                                                                     | not classified                                                                                                                                                                                                                                                 | not classified                                                                                                                                                                                           |
| PREDICTED: microtubule associated serine/threonine kinase 3 isoform 2                                                                                                                                                                              | Mast3          | XP_893383    | 144      | 1             | not classified                                                                     | ATP binding, kinase activity, magnesium ion binding, nucleotide binding, protein binding, protein kinase activity, protein serine/threonine kinase activity, transferase activity                                                                              | protein amino acid phosphorylation                                                                                                                                                                       |
| PREDICTED: similar to CDNA sequence BC061237                                                                                                                                                                                                       | EG624966       | XP_894601    | 40       | 1             | not classified                                                                     | not classified                                                                                                                                                                                                                                                 | not classified                                                                                                                                                                                           |
| PREDICTED: similar to Glyceraldehyde-3-phosphate dehydrogenase                                                                                                                                                                                     | EG626358       | XP_896039    | 41       | 1             | not classified                                                                     | not classified                                                                                                                                                                                                                                                 | not classified                                                                                                                                                                                           |
| PREDICTED: similar to Histone H1                                                                                                                                                                                                                   | EG629389       | XP_899364    | 33       | 1             | not classified                                                                     | not classified                                                                                                                                                                                                                                                 | not classified                                                                                                                                                                                           |
| PREDICTED: hypothetical protein LOC319887 isoform 3                                                                                                                                                                                                | E030030106 Rik | XP_903028    | 20       | 1             | not classified                                                                     | not classified                                                                                                                                                                                                                                                 | not classified                                                                                                                                                                                           |
| PREDICTED: similar to Histone H1                                                                                                                                                                                                                   | LOC630555      | XP_909191    | 25       | 1             | not classified                                                                     | not classified                                                                                                                                                                                                                                                 | not classified                                                                                                                                                                                           |
| PREDICTED: similar to hCG401196                                                                                                                                                                                                                    | 4921511H13 Rik | XP_909489    | 264      | 1             | nucleus                                                                            | not classified                                                                                                                                                                                                                                                 | not classified                                                                                                                                                                                           |
| PREDICTED: hypothetical protein LOC68075                                                                                                                                                                                                           | 1520402A15 Rik | XP_910167    | 26       | 1             | not classified                                                                     | not classified                                                                                                                                                                                                                                                 | not classified                                                                                                                                                                                           |
| PREDICTED: similar to Chromosome 4 open reading frame 26                                                                                                                                                                                           | Gm1045         | XP_910708    | 14       | 1             | not classified                                                                     | not classified                                                                                                                                                                                                                                                 | not classified                                                                                                                                                                                           |
| PREDICTED: similar to acidic ribosomal phosphoprotein P1                                                                                                                                                                                           | LOC270362      | XP_910749    | 12       | 1             | not classified                                                                     | not classified                                                                                                                                                                                                                                                 | not classified                                                                                                                                                                                           |
| PREDICTED: similar to Serine/threonine-protein kinase MRCK gamma (CDC42-binding protein kinase gamma) (Myotonic dystrophy kinase-related CDC42-binding kinase gamma) (Myotonic dystrophy protein kinase-like alpha) (MRCK gamma) (DMPK-like gamma) | Cdc42bpg       | XP_911542    | 172      | 1             | cytoplasm                                                                          | ATP binding, diacylglycerol binding, kinase activity, magnesium ion binding, metal ion binding, nucleotide binding, protein kinase activity, protein serine/threonine kinase activity, small GTPase regulator activity, transferase activity, zinc ion binding | intracellular signaling cascade, protein amino acid phosphorylation                                                                                                                                      |
| PREDICTED: similar to CXXC finger 6 isoform 2                                                                                                                                                                                                      | Cxxc6          | XP_912173    | 219      | 1             | cellular_component, nucleus                                                        | DNA binding, iron ion binding, metal ion binding, molecular_function, oxidoreductase activity, oxidoreductase activity, acting on single donors with incorporation of molecular oxygen, incorporation of two atoms of oxygen, zinc ion binding                 | biological_process, oxidation reduction                                                                                                                                                                  |
| PREDICTED: hypothetical protein LOC70980                                                                                                                                                                                                           | 4931431F19 Rik | XP_912873    | 55       | 1             | mitochondrion                                                                      | molecular_function                                                                                                                                                                                                                                             | biological_process                                                                                                                                                                                       |
| PREDICTED: similar to Iron-sulfur cluster assembly 2 homolog, mitochondrial precursor (HESB-like domain-containing protein 1) isoform 5                                                                                                            | Isca2          | XP_913323    | 17       | 1             | mitochondrion                                                                      | iron ion binding, iron-sulfur cluster binding, metal ion binding, structural molecule activity                                                                                                                                                                 | iron-sulfur cluster assembly                                                                                                                                                                             |
| PREDICTED: similar to Glyceraldehyde-3-phosphate dehydrogenase                                                                                                                                                                                     | EG215974       | XP_915137    | 54       | 1             | not classified                                                                     | not classified                                                                                                                                                                                                                                                 | not classified                                                                                                                                                                                           |
| PREDICTED: similar to vomeronasal receptor V1RC13                                                                                                                                                                                                  | EG546903       | XP_915275    | 36       | 1             | not classified                                                                     | not classified                                                                                                                                                                                                                                                 | not classified                                                                                                                                                                                           |
| PREDICTED: similar to Regulator of G-protein signalling 22                                                                                                                                                                                         | LOC635821      | XP_916087    | 129      | 1             | not classified                                                                     | not classified                                                                                                                                                                                                                                                 | not classified                                                                                                                                                                                           |
| PREDICTED: similar to spermatogenesis associated glutamate (E)-rich protein 2                                                                                                                                                                      | LOC635905      | XP_916210    | 29       | 1             | not classified                                                                     | not classified                                                                                                                                                                                                                                                 | not classified                                                                                                                                                                                           |
| PREDICTED: similar to mitochondrial ribosomal protein S21                                                                                                                                                                                          | EG626573       | XP_916948    | 10       | 1             | not classified                                                                     | not classified                                                                                                                                                                                                                                                 | not classified                                                                                                                                                                                           |
| PREDICTED: hypothetical protein                                                                                                                                                                                                                    | EG269105       | XP_918900    | 15       | 1             | not classified                                                                     | not classified                                                                                                                                                                                                                                                 | not classified                                                                                                                                                                                           |

| Protein Name                                                                                                              | Gene Name         | Accession No | Mw (kDa) | Peptide Count | GO Component                                                                                   | GO Function                                                                                                                                            | GO Process                                                                                                          |
|---------------------------------------------------------------------------------------------------------------------------|-------------------|--------------|----------|---------------|------------------------------------------------------------------------------------------------|--------------------------------------------------------------------------------------------------------------------------------------------------------|---------------------------------------------------------------------------------------------------------------------|
| PREDICTED: similar to CCR4-NOT transcription complex, subunit 1 isoform 16                                                | Cnot1             | XP_919363    | 267      | 1             | cellular_component                                                                             | molecular_function, protein binding                                                                                                                    | biological_process, regulation of transcription, transcription                                                      |
| PREDICTED: hypothetical protein                                                                                           | 1700024P16 Rik    | XP_920737    | 89       | 1             | not classified                                                                                 | not classified                                                                                                                                         | not classified                                                                                                      |
| PREDICTED: similar to Murinoglobulin 1                                                                                    | EG640530          | XP_922625    | 165      | 1             | not classified                                                                                 | not classified                                                                                                                                         | not classified                                                                                                      |
| PREDICTED: hypothetical protein                                                                                           | EG243642          | XP_922857    | 33       | 1             | not classified                                                                                 | not classified                                                                                                                                         | not classified                                                                                                      |
| PREDICTED: similar to Bardet-Biedl syndrome 10 protein homolog isoform 3                                                  | Bbs10             | XP_922897    | 79       | 1             | not classified                                                                                 | ATP binding, nucleotide binding, protein binding                                                                                                       | cellular protein metabolic process                                                                                  |
| PREDICTED: macrophage antigen h                                                                                           | 4933425B16 Rik    | XP_922940    | 31       | 1             | integral to membrane, membrane, plasma membrane                                                | binding, receptor activity, sugar binding                                                                                                              | not classified                                                                                                      |
| PREDICTED: similar to Chain C, Structure Of The Human Exon Junction Complex With A Trapped Dead-Box Helicase Bound To Rna | LOC641170         | XP_923606    | 47       | 1             | not classified                                                                                 | not classified                                                                                                                                         | not classified                                                                                                      |
| PREDICTED: similar to 60S ribosomal protein L7 isoform 4                                                                  | EG268809          | XP_924795    | 29       | 1             | not classified                                                                                 | not classified                                                                                                                                         | not classified                                                                                                      |
| PREDICTED: similar to ATP-binding cassette, sub-family B (MDR/TAP), member 7 isoform 7                                    | Abcb7             | XP_925448    | 83       | 1             | integral to membrane, membrane, mitochondrial inner membrane, mitochondrion                    | ATP binding, ATPase activity, ATPase activity, coupled to transmembrane movement of substances, nucleoside-triphosphatase activity, nucleotide binding | cellular iron ion homeostasis, transport                                                                            |
| PREDICTED: hypothetical protein LOC71996 isoform 4                                                                        | 1600014K23 Rik    | XP_926394    | 21       | 1             | not classified                                                                                 | not classified                                                                                                                                         | not classified                                                                                                      |
| PREDICTED: similar to RIKEN cDNA 2310028O11 gene isoform 6                                                                | 2310028O11 Rik    | XP_929663    | 9        | 1             | integral to membrane, membrane                                                                 | molecular_function                                                                                                                                     | biological_process                                                                                                  |
| PREDICTED: hypothetical protein                                                                                           | LOC674274         | XP_978458    | 21       | 1             | not classified                                                                                 | not classified                                                                                                                                         | not classified                                                                                                      |
| PREDICTED: similar to Aldehyde dehydrogenase 3 family, member B1                                                          | Aldh3b2           | XP_979234    | 65       | 1             | not classified                                                                                 | not classified                                                                                                                                         | not classified                                                                                                      |
| PREDICTED: similar to MHC class I antigen isoform 7                                                                       | ENSMUSG0000073403 | XP_979787    | 42       | 1             | not classified                                                                                 | not classified                                                                                                                                         | not classified                                                                                                      |
| PREDICTED: HECT domain containing 1                                                                                       | Hectd1            | XP_979999    | 289      | 1             | not classified                                                                                 | ligase activity                                                                                                                                        | modification-dependent protein catabolic process, neural tube closure                                               |
| PREDICTED: similar to fragile site-associated protein                                                                     | 4932438A13 Rik    | XP_980288    | 555      | 1             | integral to membrane, membrane                                                                 | not classified                                                                                                                                         | not classified                                                                                                      |
| PREDICTED: mucin 2                                                                                                        | Muc2              | XP_980706    | 91       | 1             | extracellular region, inner mucus layer, outer mucus layer, proteinaceous extracellular matrix | protein binding                                                                                                                                        | apoptosis, induction of apoptosis, negative regulation of cell migration, negative regulation of cell proliferation |
| PREDICTED: hypothetical protein                                                                                           | LOC674771         | XP_982053    | 31       | 1             | not classified                                                                                 | not classified                                                                                                                                         | not classified                                                                                                      |
| PREDICTED: similar to Rmi1 protein                                                                                        | LOC665550         | XP_982784    | 69       | 1             | not classified                                                                                 | not classified                                                                                                                                         | not classified                                                                                                      |
| PREDICTED: hypothetical protein                                                                                           | EG665756          | XP_984329    | 145      | 1             | not classified                                                                                 | not classified                                                                                                                                         | not classified                                                                                                      |
| PREDICTED: similar to KIAA1683 protein                                                                                    | 2410018E23 Rik    | XP_984456    | 141      | 1             | not classified                                                                                 | not classified                                                                                                                                         | not classified                                                                                                      |
| PREDICTED: hypothetical protein                                                                                           | LOC675231         | XP_985436    | 17       | 1             | not classified                                                                                 | not classified                                                                                                                                         | not classified                                                                                                      |
| PREDICTED: similar to mFLJ00251 protein                                                                                   | Dnhd1             | XP_988314    | 264      | 1             | not classified                                                                                 | not classified                                                                                                                                         | not classified                                                                                                      |
| PREDICTED: similar to TNS1 protein                                                                                        | Tns1              | XP_989880    | 186      | 1             | cell-substrate junction, focal adhesion                                                        | actin binding                                                                                                                                          | cell migration, cell-substrate junction assembly                                                                    |
| PREDICTED: similar to hCG2011852                                                                                          | EG666713          | XP_990666    | 394      | 1             | not classified                                                                                 | not classified                                                                                                                                         | not classified                                                                                                      |
| PREDICTED: hypothetical protein LOC74471                                                                                  | 4933440N22 Rik    | XP_991148    | 29       | 1             | not classified                                                                                 | not classified                                                                                                                                         | not classified                                                                                                      |
| PREDICTED: similar to mKIAA0897 protein                                                                                   | Ppfia4            | XP_993485    | 130      | 1             | not classified                                                                                 | not classified                                                                                                                                         | not classified                                                                                                      |
| PREDICTED: hypothetical protein                                                                                           | EG667503          | XP_996026    | 122      | 1             | not classified                                                                                 | not classified                                                                                                                                         | not classified                                                                                                      |
| PREDICTED: hypothetical protein                                                                                           | LOC676542         | XP_996040    | 57       | 1             | not classified                                                                                 | not classified                                                                                                                                         | not classified                                                                                                      |
| PREDICTED: hypothetical protein                                                                                           | EG667682          | XP_996461    | 14       | 1             | not classified                                                                                 | not classified                                                                                                                                         | not classified                                                                                                      |
| PREDICTED: similar to myeloid/lymphoid or mixed-lineage leukemia 2                                                        | Mll2              | XP_999353    | 566      | 1             | histone methyltransferase complex, nucleus                                                     | metal ion binding, methyltransferase activity, protein binding, transferase activity, zinc ion binding                                                 | in utero embryonic development                                                                                      |
| PREDICTED: similar to 17,000 dalton myosin light chain                                                                    | LOC676975         | XP_999583    | 17       | 1             | not classified                                                                                 | not classified                                                                                                                                         | not classified                                                                                                      |
