# Supplementary material
Source: PubMed Central journal article supplement (PMC2889637)
Supplement: 00552.2009_2.pdf [file 00552.2009_2.pdf]

**Supplementary Table S2. All proteins detected in EGFP+ cells from the epididymis.**

| Protein Name                                                         | Gene Name | Accession No | Mw (kDa) | Peptide Count | GO Component                                                                                                                                                                                                                         | GO Function                                                                                                                                                                                                                                                                                                                                                          | GO Process                                                                                                                                                                                                                                                                                     |
|----------------------------------------------------------------------|-----------|--------------|----------|---------------|--------------------------------------------------------------------------------------------------------------------------------------------------------------------------------------------------------------------------------------|----------------------------------------------------------------------------------------------------------------------------------------------------------------------------------------------------------------------------------------------------------------------------------------------------------------------------------------------------------------------|------------------------------------------------------------------------------------------------------------------------------------------------------------------------------------------------------------------------------------------------------------------------------------------------|
| glutamate oxaloacetate transaminase 2, mitochondrial                 | Got2      | NP_034455    | 47       | 156           | membrane, mitochondrial inner membrane, mitochondrion, plasma membrane                                                                                                                                                               | catalytic activity, L-aspartate:2-oxoglutarate aminotransferase activity, pyridoxal phosphate binding, transaminase activity, transferase activity, transferase activity, transferring nitrogenous groups                                                                                                                                                            | aspartate biosynthetic process, biosynthetic process, cellular amino acid metabolic process, glutamate catabolic process to 2-oxoglutarate, glutamate catabolic process to aspartate, lipid transport, oxaloacetate metabolic process, transport                                               |
| clathrin, heavy polypeptide (Hc)                                     | Cltc      | NP_001003908 | 192      | 144           | clathrin coat of coated pit, clathrin coat of trans-Golgi network vesicle, coated pit, cytoplasmic vesicle, membrane, membrane coat, mitochondrion                                                                                   | binding, protein binding, structural molecule activity                                                                                                                                                                                                                                                                                                               | intracellular protein transport, vesicle-mediated transport                                                                                                                                                                                                                                    |
| histone cluster 1, H4a                                               | Hist1h4a  | NP_835499    | 11       | 144           | chromosome, nucleosome, nucleus                                                                                                                                                                                                      | DNA binding                                                                                                                                                                                                                                                                                                                                                          | nucleosome assembly                                                                                                                                                                                                                                                                            |
| heat shock protein 5                                                 | Hspa5     | NP_071705    | 72       | 137           | cell surface, endoplasmic reticulum, endoplasmic reticulum lumen, extracellular region                                                                                                                                               | ATP binding, nucleotide binding, protein binding, ribosome binding                                                                                                                                                                                                                                                                                                   | ER overload response, negative regulation of transforming growth factor beta receptor signaling pathway                                                                                                                                                                                        |
| tumor rejection antigen gp96                                         | Hsp90b1   | NP_035761    | 92       | 104           | endoplasmic reticulum, plasma membrane part                                                                                                                                                                                          | ATP binding, calcium ion binding, low-density lipoprotein receptor binding, nucleotide binding, unfolded protein binding                                                                                                                                                                                                                                             | protein folding, response to stress                                                                                                                                                                                                                                                            |
| aldehyde dehydrogenase family 1, subfamily A1                        | Aldh1a1   | NP_038495    | 54       | 102           | cytoplasm                                                                                                                                                                                                                            | 3-chloroallyl aldehyde dehydrogenase activity, oxidoreductase activity, retinal dehydrogenase activity                                                                                                                                                                                                                                                               | 9-cis-retinoic acid biosynthetic process, embryonic eye morphogenesis, metabolic process, optic cup morphogenesis involved in camera-type eye development, oxidation reduction, positive regulation of apoptosis, response to drug, retinoic acid metabolic process, retinol metabolic process |
| protein disulfide isomerase associated 3                             | Pdia3     | NP_031978    | 57       | 96            | endoplasmic reticulum                                                                                                                                                                                                                | isomerase activity, protein disulfide isomerase activity                                                                                                                                                                                                                                                                                                             | cell redox homeostasis, positive regulation of apoptosis                                                                                                                                                                                                                                       |
| ATP synthase, H+ transporting mitochondrial F1 complex, beta subunit | Atp5b     | NP_058054    | 56       | 96            | membrane, mitochondrial inner membrane, mitochondrion, proton-transporting ATP synthase complex, catalytic core F(1), proton-transporting two-sector ATPase complex, proton-transporting two-sector ATPase complex, catalytic domain | ATP binding, hydrogen ion transporting ATP synthase activity, rotational mechanism, hydrogen-exporting ATPase activity, phosphorylative mechanism, hydrolase activity, acting on acid anhydrides, catalyzing transmembrane movement of substances, nucleoside-triphosphatase activity, nucleotide binding, proton-transporting ATPase activity, rotational mechanism | ATP biosynthetic process, ATP metabolic process, ATP synthesis coupled proton transport, ion transport, lipid metabolic process, negative regulation of cell adhesion involved in substrate-bound cell migration, proton transport, transport                                                  |
| aldehyde dehydrogenase 2, mitochondrial                              | Aldh2     | NP_033786    | 57       | 91            | mitochondrion                                                                                                                                                                                                                        | aldehyde dehydrogenase (NAD) activity, oxidoreductase activity                                                                                                                                                                                                                                                                                                       | metabolic process, oxidation reduction                                                                                                                                                                                                                                                         |
| actin, alpha 2, smooth muscle, aorta                                 | Acta2     | NP_031418    | 42       | 84            | actin cytoskeleton, cytoplasm, cytoskeleton, smooth muscle contractile fiber                                                                                                                                                         | ATP binding, nucleotide binding, protein binding                                                                                                                                                                                                                                                                                                                     | regulation of blood pressure, vascular smooth muscle contraction                                                                                                                                                                                                                               |

| Protein Name                                                                      | Gene Name | Accession No | Mw (kDa) | Peptide Count | GO Component                                                                                                                                                                                                                         | GO Function                                                                                                                                                                                                                                                       | GO Process                                                                                                                                                                                                                                                                                                                                                        |
|-----------------------------------------------------------------------------------|-----------|--------------|----------|---------------|--------------------------------------------------------------------------------------------------------------------------------------------------------------------------------------------------------------------------------------|-------------------------------------------------------------------------------------------------------------------------------------------------------------------------------------------------------------------------------------------------------------------|-------------------------------------------------------------------------------------------------------------------------------------------------------------------------------------------------------------------------------------------------------------------------------------------------------------------------------------------------------------------|
| myosin, heavy polypeptide 9, non-muscle isoform 1                                 | Myh9      | NP_071855    | 226      | 84            | cell cortex, cell-cell adherens junction, cortical cytoskeleton, cytoplasm, immunological synapse, myosin complex, neuromuscular junction, plasma membrane, spindle, stress fiber, uropod                                            | actin binding, actin filament binding, actin-dependent ATPase activity, ADP binding, ATP binding, calmodulin binding, microfilament motor activity, motor activity, nucleotide binding, protein binding                                                           | actin filament-based movement, cell adhesion, cell morphogenesis involved in differentiation, cell motion, cell-cell adhesion, establishment of meiotic spindle localization, establishment of T cell polarity, in utero embryonic development, meiotic metaphase I, meiotic spindle organization, myoblast fusion, regulation of cell shape, uropod organization |
| ATP synthase, H+ transporting, mitochondrial F1 complex, alpha subunit, isoform 1 | Atp5a1    | NP_031531    | 60       | 80            | membrane, mitochondrial inner membrane, mitochondrion, proton-transporting ATP synthase complex, catalytic core F(1), proton-transporting two-sector ATPase complex, proton-transporting two-sector ATPase complex, catalytic domain | ATP binding, hydrogen ion transporting ATP synthase activity, rotational mechanism, hydrolase activity, acting on acid anhydrides, catalyzing transmembrane movement of substances, nucleotide binding, proton-transporting ATPase activity, rotational mechanism | ATP biosynthetic process, ATP metabolic process, ATP synthesis coupled proton transport, embryonic development, ion transport, lipid metabolic process, proton transport, transport                                                                                                                                                                               |
| keratin complex 2, basic, gene 8                                                  | Krt8      | NP_112447    | 55       | 78            | intermediate filament, keratin filament, sarcolemma, Z disc                                                                                                                                                                          | protein binding, structural molecule activity                                                                                                                                                                                                                     | apoptosis, cell differentiation involved in embryonic placenta development, cell morphogenesis involved in differentiation, multicellular organismal development, response to other organism, tumor necrosis factor-mediated signaling pathway                                                                                                                    |
| eukaryotic translation elongation factor 1 alpha 1                                | Eef1a1    | NP_034236    | 50       | 77            | cytoplasm                                                                                                                                                                                                                            | GTP binding, nucleotide binding, translation elongation factor activity                                                                                                                                                                                           | not classified                                                                                                                                                                                                                                                                                                                                                    |
| H2A histone family, member X                                                      | H2afx     | NP_034566    | 15       | 77            | chromatin, chromosome, male germ cell nucleus, nuclear chromatin, nucleosome, nucleus, replication fork, XY body                                                                                                                     | damaged DNA binding, DNA binding, protein binding                                                                                                                                                                                                                 | cell cycle, DNA damage checkpoint, DNA recombination, DNA repair, double-strand break repair via homologous recombination, meiosis, nucleosome assembly, response to DNA damage stimulus, spermatogenesis                                                                                                                                                         |
| heat shock protein 1, beta                                                        | Hsp90ab1  | NP_032328    | 83       | 76            | cytoplasm, intracellular, mitochondrion                                                                                                                                                                                              | ATP binding, nucleotide binding, protein binding, unfolded protein binding                                                                                                                                                                                        | placenta development, protein folding, response to stress                                                                                                                                                                                                                                                                                                         |
| calnexin                                                                          | Canx      | NP_001103970 | 67       | 70            | endoplasmic reticulum, integral to membrane, membrane                                                                                                                                                                                | calcium ion binding, protein binding, sugar binding, unfolded protein binding                                                                                                                                                                                     | protein folding                                                                                                                                                                                                                                                                                                                                                   |
| aconitase 2, mitochondrial                                                        | Aco2      | NP_542364    | 85       | 70            | mitochondrion                                                                                                                                                                                                                        | 4 iron, 4 sulfur cluster binding, aconitate hydratase activity, iron ion binding, iron-sulfur cluster binding, lyase activity, metal ion binding                                                                                                                  | citrate metabolic process, metabolic process, tricarboxylic acid cycle                                                                                                                                                                                                                                                                                            |

| Protein Name                                | Gene Name | Accession No | Mw (kDa) | Peptide Count | GO Component                                                                                                                                                                         | GO Function                                                                                                                                                                                                                  | GO Process                                                                                                                                                                      |
|---------------------------------------------|-----------|--------------|----------|---------------|--------------------------------------------------------------------------------------------------------------------------------------------------------------------------------------|------------------------------------------------------------------------------------------------------------------------------------------------------------------------------------------------------------------------------|---------------------------------------------------------------------------------------------------------------------------------------------------------------------------------|
| prolyl 4-hydroxylase, beta polypeptide      | P4hb      | NP_035162    | 57       | 67            | endoplasmic reticulum, membrane, microsome, plasma membrane                                                                                                                          | isomerase activity, procollagen-proline 4-dioxygenase activity, protein disulfide isomerase activity                                                                                                                         | cell redox homeostasis, peptidyl-proline hydroxylation to 4-hydroxy L-proline                                                                                                   |
| keratin 18                                  | Krt18     | NP_034794    | 48       | 66            | intermediate filament                                                                                                                                                                | protein binding, structural molecule activity                                                                                                                                                                                | apoptosis, tumor necrosis factor-mediated signaling pathway                                                                                                                     |
| glycoprotein, synaptic 2                    | Gpsn2     | NP_598879    | 36       | 62            | cytoplasm, endoplasmic reticulum, integral to membrane, membrane                                                                                                                     | oxidoreductase activity, oxidoreductase activity, acting on the CH-CH group of donors                                                                                                                                        | lipid biosynthetic process, lipid metabolic process, oxidation reduction, steroid biosynthetic process                                                                          |
| actin, gamma, cytoplasmic 1                 | Actg1     | NP_033739    | 42       | 59            | actin cytoskeleton, costamere, cytoplasm, cytoskeleton, myofibril                                                                                                                    | ATP binding, nucleotide binding, protein binding, structural constituent of cytoskeleton                                                                                                                                     | sarcomere organization                                                                                                                                                          |
| histone cluster 1, H1c                      | Hist1h1c  | NP_056601    | 21       | 59            | chromosome, nucleosome, nucleus                                                                                                                                                      | DNA binding, protein binding                                                                                                                                                                                                 | nucleosome assembly, nucleosome positioning                                                                                                                                     |
| heat shock protein 2                        | Hspa2     | NP_001002012 | 70       | 57            | mitochondrion                                                                                                                                                                        | ATP binding, nucleotide binding, protein binding                                                                                                                                                                             | response to stress                                                                                                                                                              |
| protein disulfide isomerase-associated 6    | Pdia6     | NP_082235    | 49       | 56            | endoplasmic reticulum                                                                                                                                                                | isomerase activity, protein disulfide isomerase activity                                                                                                                                                                     | cell redox homeostasis                                                                                                                                                          |
| glyceraldehyde-3-phosphate dehydrogenase    | Gapdh     | NP_032110    | 36       | 55            | cytoplasm, mitochondrion                                                                                                                                                             | glyceraldehyde-3-phosphate dehydrogenase (phosphorylating) activity, glyceraldehyde-3-phosphate dehydrogenase activity, NAD or NADH binding, oxidoreductase activity, protein binding                                        | glucose metabolic process, glycolysis, multicellular organismal development, oxidation reduction                                                                                |
| malate dehydrogenase 2, NAD (mitochondrial) | Mdh2      | NP_032643    | 36       | 54            | mitochondrial inner membrane, mitochondrion                                                                                                                                          | binding, catalytic activity, L-malate dehydrogenase activity, malate dehydrogenase activity, oxidoreductase activity, oxidoreductase activity, acting on the CH-OH group of donors, NAD or NADP as acceptor, protein binding | carbohydrate metabolic process, cellular carbohydrate metabolic process, glycolysis, malate metabolic process, metabolic process, oxidation reduction, tricarboxylic acid cycle |
| glutathione S-transferase, mu 1             | Gstm1     | NP_034488    | 26       | 54            | cytoplasm                                                                                                                                                                            | glutathione transferase activity, transferase activity                                                                                                                                                                       | metabolic process                                                                                                                                                               |
| keratin complex 1, acidic, gene 10          | Krt10     | NP_034790    | 57       | 54            | intermediate filament, keratin filament                                                                                                                                              | protein binding, structural molecule activity                                                                                                                                                                                | not classified                                                                                                                                                                  |
| protein disulfide isomerase associated 4    | Pdia4     | NP_033917    | 72       | 53            | endoplasmic reticulum, endoplasmic reticulum lumen                                                                                                                                   | isomerase activity, protein binding, protein disulfide isomerase activity                                                                                                                                                    | cell redox homeostasis                                                                                                                                                          |
| villin 2                                    | Ezr       | NP_033536    | 69       | 52            | apical part of cell, apical plasma membrane, cell projection, cytoplasm, cytoskeleton, extrinsic to membrane, membrane, microtubule basal body, microvillus, plasma membrane, uropod | binding, cytoskeletal protein binding, protein binding                                                                                                                                                                       | establishment or maintenance of apical/basal cell polarity, regulation of cell shape                                                                                            |
| plectin 1 isoform 2                         | Plec1     | NP_958787    | 516      | 51            | contractile fiber, cytoplasm, cytoskeleton, insoluble fraction                                                                                                                       | actin binding                                                                                                                                                                                                                | not classified                                                                                                                                                                  |
| albumin                                     | Alb       | NP_033784    | 69       | 50            | cytoplasm, extracellular region, extracellular space                                                                                                                                 | copper ion binding, lipid binding, metal ion binding                                                                                                                                                                         | transport                                                                                                                                                                       |

| Protein Name                       | Gene Name | Accession No | Mw (kDa) | Peptide Count | GO Component                                                                            | GO Function                                                                                                                                                                                                                                                                                                                                                                                                                                                                                                                                                                                                                                                                                                         | GO Process                                                                                                                                                                                                                                                                 |
|------------------------------------|-----------|--------------|----------|---------------|-----------------------------------------------------------------------------------------|---------------------------------------------------------------------------------------------------------------------------------------------------------------------------------------------------------------------------------------------------------------------------------------------------------------------------------------------------------------------------------------------------------------------------------------------------------------------------------------------------------------------------------------------------------------------------------------------------------------------------------------------------------------------------------------------------------------------|----------------------------------------------------------------------------------------------------------------------------------------------------------------------------------------------------------------------------------------------------------------------------|
| keratin complex 2, basic, gene 1   | Krt1      | NP_032499    | 66       | 48            | intermediate filament, keratin filament, membrane, plasma membrane                      | structural molecule activity                                                                                                                                                                                                                                                                                                                                                                                                                                                                                                                                                                                                                                                                                        | not classified                                                                                                                                                                                                                                                             |
| calreticulin                       | Calr      | NP_031617    | 48       | 46            | endoplasmic reticulum, external side of plasma membrane, extracellular space, microsome | calcium ion binding, metal ion binding, sugar binding, unfolded protein binding, zinc ion binding                                                                                                                                                                                                                                                                                                                                                                                                                                                                                                                                                                                                                   | cortical actin cytoskeleton organization, protein folding, regulation of meiosis                                                                                                                                                                                           |
| ubiquitin B                        | Ubb       | NP_035794    | 34       | 46            | cytoplasm, nucleus                                                                      | protein binding                                                                                                                                                                                                                                                                                                                                                                                                                                                                                                                                                                                                                                                                                                     | not classified                                                                                                                                                                                                                                                             |
| triosephosphate isomerase 1        | Tpi1      | NP_033441    | 27       | 45            | not classified                                                                          | catalytic activity, isomerase activity, triose-phosphate isomerase activity                                                                                                                                                                                                                                                                                                                                                                                                                                                                                                                                                                                                                                         | embryonic development, fatty acid biosynthetic process, gluconeogenesis, glucose metabolic process, glyceraldehyde-3-phosphate metabolic process, glycolysis, lipid biosynthetic process, metabolic process, multicellular organismal development, pentose-phosphate shunt |
| solute carrier family 25, member 5 | Slc25a5   | NP_031477    | 33       | 44            | integral to membrane, membrane, mitochondrial inner membrane, mitochondrion             | binding, transporter activity                                                                                                                                                                                                                                                                                                                                                                                                                                                                                                                                                                                                                                                                                       | transport                                                                                                                                                                                                                                                                  |
| glutathione S-transferase, mu 2    | Gstm2     | NP_032209    | 26       | 44            | cytoplasm                                                                               | glutathione transferase activity, protein binding, transferase activity                                                                                                                                                                                                                                                                                                                                                                                                                                                                                                                                                                                                                                             | metabolic process                                                                                                                                                                                                                                                          |
| fatty acid synthase                | Fasn      | NP_032014    | 272      | 41            | cytoplasm, glycogen granule                                                             | [acyl-carrier-protein] S-acetyltransferase activity, [acyl-carrier-protein] S-malonyltransferase activity, 3-hydroxypalmitoyl-[acyl-carrier-protein] dehydratase activity, 3-oxoacyl-[acyl-carrier-protein] reductase activity, 3-oxoacyl-[acyl-carrier-protein] synthase activity, acyl carrier activity, acyltransferase activity, binding, catalytic activity, cofactor binding, enoyl-[acyl-carrier-protein] reductase (NADPH, B-specific) activity, fatty-acid synthase activity, hydrolase activity, hydrolase activity, acting on ester bonds, lyase activity, oleoyl-[acyl-carrier-protein] hydrolase activity, oxidoreductase activity, phosphopantetheine binding, transferase activity, zinc ion binding | biosynthetic process, fatty acid biosynthetic process, lipid biosynthetic process, metabolic process, oxidation reduction                                                                                                                                                  |
| pyruvate kinase, muscle            | Pkm2      | NP_035229    | 58       | 41            | cytoplasm, flagellum, mitochondrion, nucleus                                            | ATP binding, catalytic activity, kinase activity, magnesium ion binding, metal ion binding, nucleotide binding, potassium ion binding, protein binding, pyruvate kinase activity, transferase activity                                                                                                                                                                                                                                                                                                                                                                                                                                                                                                              | glycolysis                                                                                                                                                                                                                                                                 |

| Protein Name                          | Gene Name | Accession No | Mw (kDa) | Peptide Count | GO Component                                                                      | GO Function                                                                                                                                                                                                                | GO Process                                                                                                                                                                                                                                                                                                                                                            |
|---------------------------------------|-----------|--------------|----------|---------------|-----------------------------------------------------------------------------------|----------------------------------------------------------------------------------------------------------------------------------------------------------------------------------------------------------------------------|-----------------------------------------------------------------------------------------------------------------------------------------------------------------------------------------------------------------------------------------------------------------------------------------------------------------------------------------------------------------------|
| dynein, cytoplasmic, heavy chain 1    | Dync1h1   | NP_084514    | 532      | 41            | cytoplasm, dynein complex, microtubule                                            | ATP binding, ATPase activity, microtubule motor activity, motor activity, nucleoside-triphosphatase activity, nucleotide binding, protein binding                                                                          | microtubule-based movement                                                                                                                                                                                                                                                                                                                                            |
| lamin A isoform A                     | Lmna      | NP_001002011 | 74       | 40            | intermediate filament, lamin filament, nucleus                                    | protein binding, structural molecule activity                                                                                                                                                                              | nuclear envelope organization                                                                                                                                                                                                                                                                                                                                         |
| glutathione S-transferase, mu 4       | Gstm4     | NP_081040    | 26       | 40            | cytosol                                                                           | glutathione transferase activity, transferase activity                                                                                                                                                                     | nitrobenzene metabolic process, xenobiotic catabolic process                                                                                                                                                                                                                                                                                                          |
| peroxiredoxin 1                       | Prdx1     | NP_035164    | 22       | 39            | cytoplasm, nucleus                                                                | antioxidant activity, oxidoreductase activity, peroxidase activity, peroxiredoxin activity                                                                                                                                 | cell proliferation, cell redox homeostasis, erythrocyte homeostasis, hydrogen peroxide catabolic process, natural killer cell mediated cytotoxicity, oxidation reduction, regulation of NF-kappaB import into nucleus, regulation of stress-activated MAPK cascade, removal of superoxide radicals, response to oxidative stress, response to reactive oxygen species |
| heat shock protein 8                  | Hspa8     | NP_112442    | 71       | 39            | cytosol, intracellular                                                            | ATP binding, ATPase activity, coupled, nucleotide binding, protein binding, unfolded protein binding                                                                                                                       | chaperone mediated protein folding requiring cofactor, protein folding, regulation of cell cycle, response to stress                                                                                                                                                                                                                                                  |
| spectrin alpha 2                      | Spna2     | NP_001070022 | 285      | 38            | cortical cytoskeleton, cytoplasm, cytoskeleton, fascia adherens, membrane, Z disc | actin binding, calcium ion binding, calmodulin binding                                                                                                                                                                     | actin filament capping                                                                                                                                                                                                                                                                                                                                                |
| malate dehydrogenase 1, NAD (soluble) | Mdh1      | NP_032644    | 36       | 36            | cytoplasm, cytosol                                                                | binding, catalytic activity, L-malate dehydrogenase activity, malate dehydrogenase activity, oxidoreductase activity, oxidoreductase activity, acting on the CH-OH group of donors, NAD or NADP as acceptor                | carbohydrate metabolic process, cellular carbohydrate metabolic process, glycolysis, malate metabolic process, metabolic process, oxidation reduction, tricarboxylic acid cycle                                                                                                                                                                                       |
| acyl-Coenzyme A oxidase 3, pristanoyl | Acox3     | NP_109646    | 78       | 36            | peroxisomal matrix, peroxisome                                                    | acyl-CoA dehydrogenase activity, acyl-CoA oxidase activity, electron carrier activity, FAD binding, oxidoreductase activity, oxidoreductase activity, acting on the CH-CH group of donors, pristanoyl-CoA oxidase activity | fatty acid beta-oxidation, fatty acid metabolic process, lipid metabolic process, metabolic process, oxidation reduction                                                                                                                                                                                                                                              |
| valosin containing protein            | Vcp       | NP_033529    | 89       | 35            | cytoplasm, microsome, nucleus                                                     | ATP binding, binding, hydrolase activity, lipid binding, nucleoside-triphosphatase activity, nucleotide binding, protein binding                                                                                           | activation of caspase activity, modification-dependent protein catabolic process, transport                                                                                                                                                                                                                                                                           |
| glutathione S-transferase, mu 5       | Gstm5     | NP_034490    | 27       | 35            | cytoplasm                                                                         | glutathione transferase activity, transferase activity                                                                                                                                                                     | metabolic process                                                                                                                                                                                                                                                                                                                                                     |
| hypoxia up-regulated 1                | Hyou1     | NP_067370    | 111      | 35            | endoplasmic reticulum                                                             | ATP binding, nucleotide binding                                                                                                                                                                                            | response to stress                                                                                                                                                                                                                                                                                                                                                    |

| Protein Name                                                     | Gene Name      | Accession No | Mw (kDa) | Peptide Count | GO Component                                                                                        | GO Function                                                                                                                                                                                                                                                                                                                                                                                                                                                                                                          | GO Process                                                                                                                                                                                                                                                                                                                                                                                                                                                                      |
|------------------------------------------------------------------|----------------|--------------|----------|---------------|-----------------------------------------------------------------------------------------------------|----------------------------------------------------------------------------------------------------------------------------------------------------------------------------------------------------------------------------------------------------------------------------------------------------------------------------------------------------------------------------------------------------------------------------------------------------------------------------------------------------------------------|---------------------------------------------------------------------------------------------------------------------------------------------------------------------------------------------------------------------------------------------------------------------------------------------------------------------------------------------------------------------------------------------------------------------------------------------------------------------------------|
| methylenetetrahydrofolate dehydrogenase (NADP+ dependent) 1-like | Mthfd1l        | NP_758512    | 106      | 35            | mitochondrion                                                                                       | ATP binding, binding, catalytic activity, formate-tetrahydrofolate ligase activity, ligase activity, nucleotide binding                                                                                                                                                                                                                                                                                                                                                                                              | 10-formyltetrahydrofolate biosynthetic process, folic acid and derivative biosynthetic process, metabolic process, one-carbon metabolic process                                                                                                                                                                                                                                                                                                                                 |
| pyridoxal-dependent decarboxylase domain containing 1 isoform 3  | Pdxdc1         | NP_001034622 | 79       | 34            | not classified                                                                                      | carboxy-lyase activity, lyase activity, pyridoxal phosphate binding                                                                                                                                                                                                                                                                                                                                                                                                                                                  | carboxylic acid metabolic process                                                                                                                                                                                                                                                                                                                                                                                                                                               |
| tubulin, beta 3                                                  | Tubb3          | NP_075768    | 50       | 34            | axon, intracellular, microtubule, microtubule cytoskeleton, protein complex                         | GTP binding, GTPase activity, nucleotide binding, structural molecule activity                                                                                                                                                                                                                                                                                                                                                                                                                                       | microtubule-based movement, microtubule-based process, protein polymerization                                                                                                                                                                                                                                                                                                                                                                                                   |
| ribophorin I                                                     | Rpn1           | NP_598694    | 69       | 34            | endoplasmic reticulum, endoplasmic reticulum membrane, integral to membrane, membrane               | dolichyl-diphosphooligosaccharide protein glycotransferase activity, transferase activity                                                                                                                                                                                                                                                                                                                                                                                                                            | protein amino acid glycosylation                                                                                                                                                                                                                                                                                                                                                                                                                                                |
| hemoglobin, beta adult major chain                               | Hbb-b1         | NP_032246    | 16       | 32            | hemoglobin complex                                                                                  | heme binding, iron ion binding, metal ion binding, oxygen binding, oxygen transporter activity                                                                                                                                                                                                                                                                                                                                                                                                                       | hemopoiesis, oxygen transport, regulation of eIF2 alpha phosphorylation by heme, transport                                                                                                                                                                                                                                                                                                                                                                                      |
| Na+/K+ -ATPase alpha 1 subunit                                   | Atp1a1         | NP_659149    | 113      | 32            | basolateral plasma membrane, integral to membrane, membrane, microsome, plasma membrane, sarcolemma | 4-nitrophenylphosphatase activity, ATP binding, ATPase activity, coupled to transmembrane movement of ions, phosphorylative mechanism, catalytic activity, hydrolase activity, hydrolase activity, acting on acid anhydrides, catalyzing transmembrane movement of substances, magnesium ion binding, metal ion binding, monovalent inorganic cation transmembrane transporter activity, nucleotide binding, potassium ion binding, protein binding, sodium ion binding, sodium:potassium-exchanging ATPase activity | ATP biosynthetic process, cation transport, ion transport, metabolic process, monovalent inorganic cation transport, negative regulation of glucocorticoid biosynthetic process, negative regulation of heart contraction, positive regulation of heart contraction, positive regulation of striated muscle contraction, potassium ion transport, regulation of blood pressure, regulation of the force of heart contraction, response to drug, sodium ion transport, transport |
| mitochondrial trifunctional protein, alpha subunit               | Hadha          | NP_849209    | 83       | 32            | fatty acid beta-oxidation multienzyme complex, mitochondrial inner membrane, mitochondrion          | 3-hydroxyacyl-CoA dehydrogenase activity, binding, catalytic activity, coenzyme binding, enoyl-CoA hydratase activity, long-chain-3-hydroxyacyl-CoA dehydrogenase activity, lyase activity, oxidoreductase activity                                                                                                                                                                                                                                                                                                  | fatty acid beta-oxidation, fatty acid metabolic process, lipid metabolic process, metabolic process, oxidation reduction                                                                                                                                                                                                                                                                                                                                                        |
| tubulin, alpha 4                                                 | Tuba4a         | NP_033473    | 50       | 31            | microtubule, protein complex                                                                        | GTP binding, GTPase activity, nucleotide binding, structural molecule activity                                                                                                                                                                                                                                                                                                                                                                                                                                       | microtubule-based movement, microtubule-based process, protein polymerization                                                                                                                                                                                                                                                                                                                                                                                                   |
| keratin 7                                                        | Krt7           | NP_149064    | 51       | 31            | intermediate filament, keratin filament                                                             | protein binding, structural molecule activity                                                                                                                                                                                                                                                                                                                                                                                                                                                                        | not classified                                                                                                                                                                                                                                                                                                                                                                                                                                                                  |
| gelsolin                                                         | Gsn            | NP_666232    | 86       | 31            | cytoplasm, cytoskeleton, extracellular region, lamellipodium                                        | actin binding, calcium ion binding                                                                                                                                                                                                                                                                                                                                                                                                                                                                                   | actin filament capping, vesicle-mediated transport                                                                                                                                                                                                                                                                                                                                                                                                                              |
| hypothetical protein LOC231293                                   | C130090K23 Rik | NP_851840    | 78       | 31            | integral to membrane, membrane                                                                      | not classified                                                                                                                                                                                                                                                                                                                                                                                                                                                                                                       | GPI anchor biosynthetic process                                                                                                                                                                                                                                                                                                                                                                                                                                                 |

| Protein Name                                                                                 | Gene Name | Accession No | Mw (kDa) | Peptide Count | GO Component                                                                                                    | GO Function                                                                                                                                                             | GO Process                                                                                                                                                                                              |
|----------------------------------------------------------------------------------------------|-----------|--------------|----------|---------------|-----------------------------------------------------------------------------------------------------------------|-------------------------------------------------------------------------------------------------------------------------------------------------------------------------|---------------------------------------------------------------------------------------------------------------------------------------------------------------------------------------------------------|
| epididymal secretory protein E1                                                              | Npc2      | NP_075898    | 16       | 30            | extracellular region, lysosome                                                                                  | cholesterol binding                                                                                                                                                     | cholesterol homeostasis, intracellular cholesterol transport                                                                                                                                            |
| solute carrier family 25 (mitochondrial carrier; adenine nucleotide translocator), member 31 | Slc25a31  | NP_848473    | 35       | 30            | cell projection, cilium, flagellum, integral to membrane, membrane, mitochondrial inner membrane, mitochondrion | binding, transporter activity                                                                                                                                           | transport                                                                                                                                                                                               |
| heat shock protein 1, alpha                                                                  | Hsp90aa1  | NP_034610    | 85       | 29            | cytoplasm, cytosol, intracellular                                                                               | ATP binding, nitric-oxide synthase regulator activity, nucleotide binding, protein binding, protein homodimerization activity, unfolded protein binding                 | positive regulation of cytotoxic T cell differentiation, positive regulation of nitric oxide biosynthetic process, protein folding, protein refolding, response to stress, response to unfolded protein |
| keratin 14                                                                                   | Krt14     | NP_058654    | 53       | 29            | cytoplasm, intermediate filament, keratin filament, nucleus                                                     | protein binding, structural molecule activity                                                                                                                           | not classified                                                                                                                                                                                          |
| solute carrier family 25 (mitochondrial carrier, phosphate carrier), member 3                | Slc25a3   | NP_598429    | 40       | 29            | integral to membrane, membrane, mitochondrial inner membrane, mitochondrion                                     | binding, symporter activity                                                                                                                                             | transport                                                                                                                                                                                               |
| aldehyde dehydrogenase family 6, subfamily A1                                                | Aldh6a1   | NP_598803    | 58       | 29            | mitochondrion                                                                                                   | malonate-semialdehyde dehydrogenase (acetylating) activity, methylmalonate-semialdehyde dehydrogenase (acylating) activity, molecular_function, oxidoreductase activity | brown fat cell differentiation, metabolic process, oxidation reduction, valine metabolic process                                                                                                        |
| UDP-glucose ceramide glucosyltransferase-like 1                                              | Ugcgl1    | NP_942602    | 176      | 28            | endoplasmic reticulum                                                                                           | transferase activity, transferase activity, transferring glycosyl groups, UDP-glucose:glycoprotein glucosyltransferase activity                                         | protein amino acid glycosylation                                                                                                                                                                        |
| glutamine synthetase                                                                         | Glul      | NP_032157    | 42       | 27            | cytoplasm, intracellular, mitochondrion                                                                         | ATP binding, catalytic activity, glutamate-ammonia ligase activity, ligase activity, nucleotide binding                                                                 | glutamine biosynthetic process, nitrogen compound metabolic process, response to glucose stimulus                                                                                                       |
| keratin 19                                                                                   | Krt19     | NP_032497    | 45       | 27            | intermediate filament, sarcolemma, Z disc                                                                       | structural molecule activity                                                                                                                                            | cell differentiation involved in embryonic placenta development                                                                                                                                         |
| aminolevulinatase, delta-, dehydratase                                                       | Alad      | NP_032551    | 36       | 27            | not classified                                                                                                  | catalytic activity, identical protein binding, lyase activity, metal ion binding, porphobilinogen synthase activity, zinc ion binding                                   | heme biosynthetic process, metabolic process, porphyrin biosynthetic process, tetrapyrrole biosynthetic process                                                                                         |
| transketolase                                                                                | Tkt       | NP_033414    | 68       | 27            | not classified                                                                                                  | calcium ion binding, catalytic activity, metal ion binding, transferase activity, transketolase activity                                                                | metabolic process, regulation of growth                                                                                                                                                                 |
| phosphatidylethanolamine binding protein 1                                                   | Pebp1     | NP_061346    | 21       | 27            | cell surface, cytoplasm                                                                                         | ATP binding, lipid binding, nucleotide binding, peptidase inhibitor activity, serine-type endopeptidase inhibitor activity                                              | sperm capacitation                                                                                                                                                                                      |
| histone cluster 1, H1e                                                                       | Hist1h1e  | NP_056602    | 22       | 26            | chromosome, nucleosome, nucleus                                                                                 | DNA binding, protein binding                                                                                                                                            | nucleosome assembly, nucleosome positioning                                                                                                                                                             |

| Protein Name                                                                     | Gene Name      | Accession No | Mw (kDa) | Peptide Count | GO Component                                                                                                                              | GO Function                                                                                                                                                                    | GO Process                                                                                                                                                                                                               |
|----------------------------------------------------------------------------------|----------------|--------------|----------|---------------|-------------------------------------------------------------------------------------------------------------------------------------------|--------------------------------------------------------------------------------------------------------------------------------------------------------------------------------|--------------------------------------------------------------------------------------------------------------------------------------------------------------------------------------------------------------------------|
| plasma glutamate carboxypeptidase                                                | Pgcp           | NP_061225    | 52       | 26            | cellular_component, extracellular region                                                                                                  | aminopeptidase activity, carboxypeptidase activity, hydrolase activity, metal ion binding, metallopeptidase activity, molecular_function, peptidase activity, zinc ion binding | biological_process, proteolysis                                                                                                                                                                                          |
| PREDICTED: hypothetical protein                                                  | EG626058       | XP_895712    | 22       | 26            | not classified                                                                                                                            | not classified                                                                                                                                                                 | not classified                                                                                                                                                                                                           |
| valyl-tRNA synthetase                                                            | Vars           | NP_035820    | 140      | 25            | cytoplasm, mitochondrion                                                                                                                  | aminoacyl-tRNA ligase activity, ATP binding, ligase activity, nucleotide binding, valine-tRNA ligase activity                                                                  | translation, tRNA aminoacylation for protein translation, valyl-tRNA aminoacylation                                                                                                                                      |
| trypsinogen 7                                                                    | Z210010C04 Rik | NP_075822    | 26       | 25            | not classified                                                                                                                            | hydrolase activity, peptidase activity, serine-type peptidase activity                                                                                                         | not classified                                                                                                                                                                                                           |
| aldolase A, fructose-bisphosphate                                                | Aldoa          | NP_031464    | 39       | 24            | extracellular region, flagellum, platelet alpha granule lumen                                                                             | catalytic activity, fructose-bisphosphate aldolase activity, lyase activity                                                                                                    | glycolysis, metabolic process                                                                                                                                                                                            |
| heat shock protein 1 (chaperonin)                                                | Hspd1          | NP_034607    | 61       | 24            | cytoplasm, intracellular membrane-bounded organelle, mitochondrial inner membrane, mitochondrion, plasma membrane part, secretory granule | ATP binding, lipopolysaccharide binding, nucleotide binding, protein binding                                                                                                   | cellular protein metabolic process, positive regulation of interferon-alpha production, positive regulation of interferon-gamma production, positive regulation of T cell activation, protein folding, T cell activation |
| staphylococcal nuclease domain containing 1                                      | Snd1           | NP_062750    | 102      | 24            | cellular_component, cytoplasm, nucleus, RNA-induced silencing complex                                                                     | hydrolase activity, acting on ester bonds, nuclease activity, nucleic acid binding, protein binding                                                                            | biological_process, regulation of transcription, RNA interference, transcription                                                                                                                                         |
| ATP synthase, H+ transporting, mitochondrial F1 complex, gamma subunit isoform b | Atp5c1         | NP_001106209 | 30       | 23            | membrane, mitochondrial inner membrane, mitochondrion, proton-transporting ATP synthase complex, catalytic core F(1)                      | hydrogen ion transporting ATP synthase activity, rotational mechanism, proton-transporting ATPase activity, rotational mechanism                                               | ATP biosynthetic process, ATP synthesis coupled proton transport, ion transport, proton transport, transport                                                                                                             |
| heat shock 70kDa protein 1B                                                      | Hspa1b         | NP_034608    | 70       | 23            | intracellular, mitochondrial matrix, mitochondrion                                                                                        | ATP binding, nucleotide binding, protein binding                                                                                                                               | anti-apoptosis, DNA repair, negative regulation of caspase activity, response to heat, response to stress, telomere maintenance                                                                                          |
| voltage-dependent anion channel 1                                                | Vdac1          | NP_035824    | 31       | 23            | integral to membrane, membrane, mitochondrial inner membrane, mitochondrial outer membrane, mitochondrion, plasma membrane, pore complex  | nucleotide binding, voltage-gated anion channel activity                                                                                                                       | anion transport, apoptosis, behavioral fear response, ion transport, learning, nerve-nerve synaptic transmission, synaptic transmission, transport                                                                       |
| keratin 76                                                                       | Krt76          | NP_001028349 | 63       | 22            | intermediate filament, keratin filament                                                                                                   | structural molecule activity                                                                                                                                                   | not classified                                                                                                                                                                                                           |
| tubulin, beta 4                                                                  | Tubb4          | NP_033477    | 50       | 22            | cell projection, cell soma, cilium, internode region of axon, microtubule, myelin sheath, protein complex                                 | GTP binding, GTPase activity, nucleotide binding, structural molecule activity                                                                                                 | cell projection organization, microtubule-based movement, microtubule-based process, protein polymerization                                                                                                              |
| heat shock protein 9                                                             | Hspa9          | NP_034611    | 73       | 22            | cytoplasm, mitochondrion                                                                                                                  | ATP binding, enzyme binding, nucleotide binding, protein binding, unfolded protein binding                                                                                     | protein export from nucleus, protein folding, response to stress                                                                                                                                                         |
| nucleolin                                                                        | Ncl            | NP_035010    | 77       | 22            | nucleolus, nucleoplasm, nucleus, ribonucleoprotein complex                                                                                | DNA binding, nucleic acid binding, nucleotide binding, protein binding, RNA binding                                                                                            | not classified                                                                                                                                                                                                           |



| Protein Name                                    | Gene Name | Accession No | Mw (kDa) | Peptide Count | GO Component                                                                                                                                                                                                  | GO Function                                                                                                                                                                                                                        | GO Process                                                                                                                                                                                                                                                                                                                    |
|-------------------------------------------------|-----------|--------------|----------|---------------|---------------------------------------------------------------------------------------------------------------------------------------------------------------------------------------------------------------|------------------------------------------------------------------------------------------------------------------------------------------------------------------------------------------------------------------------------------|-------------------------------------------------------------------------------------------------------------------------------------------------------------------------------------------------------------------------------------------------------------------------------------------------------------------------------|
| peptidylprolyl isomerase B                      | Ppib      | NP_035279    | 24       | 22            | endoplasmic reticulum                                                                                                                                                                                         | isomerase activity, peptide binding, peptidyl-prolyl cis-trans isomerase activity                                                                                                                                                  | protein folding                                                                                                                                                                                                                                                                                                               |
| tubulin, alpha 1                                | Tuba1a    | NP_035783    | 50       | 22            | cytoplasmic microtubule, microtubule, protein complex                                                                                                                                                         | GTP binding, GTPase activity, nucleotide binding, structural molecule activity                                                                                                                                                     | microtubule-based movement, microtubule-based process, protein polymerization                                                                                                                                                                                                                                                 |
| enolase 1, alpha non-neuron                     | Eno1      | NP_075608    | 47       | 22            | not classified                                                                                                                                                                                                | lyase activity, magnesium ion binding, phosphopyruvate hydratase activity, protein binding                                                                                                                                         | glycolysis                                                                                                                                                                                                                                                                                                                    |
| ribosome binding protein 1 isoform a            | Rrbp1     | NP_077243    | 158      | 22            | endoplasmic reticulum, integral to endoplasmic reticulum membrane, integral to membrane, membrane                                                                                                             | not classified                                                                                                                                                                                                                     | protein transport, transmembrane transport, transport                                                                                                                                                                                                                                                                         |
| myosin VI                                       | Myo6      | NP_001034635 | 146      | 21            | axon, cell projection, cell soma, coated pit, cytoplasm, cytoplasmic vesicle, Golgi apparatus, membrane, myosin complex, nucleus, perinuclear region of cytoplasm, plasma membrane, synapse, vesicle membrane | actin binding, actin filament binding, ATP binding, calmodulin binding, motor activity, nucleotide binding, protein binding                                                                                                        | auditory receptor cell differentiation, dendrite development, endocytosis, glutamate secretion, inner ear development, inner ear morphogenesis, locomotory behavior, protein targeting, protein transport, regulation of synaptic plasticity, sensory perception of sound, synapse assembly, synaptic transmission, transport |
| annexin A2                                      | Anxa2     | NP_031611    | 39       | 21            | basement membrane, cell junction, cytoplasm, early endosome, extracellular region, membrane fraction, proteinaceous extracellular matrix, sarcolemma, stress fiber                                            | calcium ion binding, calcium-dependent phospholipid binding, cytoskeletal protein binding, phospholipase inhibitor activity, protein binding                                                                                       | angiogenesis, collagen fibril organization, fibrinolysis                                                                                                                                                                                                                                                                      |
| voltage-dependent anion channel 2               | Vdac2     | NP_035825    | 32       | 21            | integral to membrane, membrane, mitochondrial inner membrane, mitochondrial outer membrane, mitochondrion, pore complex                                                                                       | nucleotide binding, voltage-gated anion channel activity                                                                                                                                                                           | anion transport, ion transport, transport                                                                                                                                                                                                                                                                                     |
| IQ motif containing GTPase activating protein 1 | Iqgap1    | NP_057930    | 189      | 21            | cell leading edge, cytoplasm, intracellular membrane, neuron projection, plasma membrane                                                                                                                      | calmodulin binding, GTPase activator activity, protein binding, Ras GTPase activator activity                                                                                                                                      | regulation of small GTPase mediated signal transduction, small GTPase mediated signal transduction                                                                                                                                                                                                                            |
| acetyl-Coenzyme A acetyltransferase 1 precursor | Acat1     | NP_659033    | 45       | 21            | mitochondrial inner membrane, mitochondrion                                                                                                                                                                   | acetyl-CoA C-acetyltransferase activity, acyltransferase activity, catalytic activity, metal ion binding, potassium ion binding, transferase activity, transferase activity, transferring acyl groups other than amino-acyl groups | metabolic process                                                                                                                                                                                                                                                                                                             |
| keratin complex 2, basic, gene 17               | Krt2      | NP_034798    | 71       | 20            | intermediate filament, keratin filament                                                                                                                                                                       | structural molecule activity                                                                                                                                                                                                       | not classified                                                                                                                                                                                                                                                                                                                |
| heterogeneous nuclear ribonucleoprotein K       | Hnrnpk    | NP_079555    | 51       | 20            | cytoplasm, nucleus, ribonucleoprotein complex, spliceosomal complex                                                                                                                                           | DNA binding, nucleic acid binding, protein binding, RNA binding                                                                                                                                                                    | mRNA processing, RNA splicing                                                                                                                                                                                                                                                                                                 |
| histone cluster 1, H2ab                         | Hist1h2ab | NP_783591    | 14       | 20            | chromosome, nucleosome, nucleus                                                                                                                                                                               | DNA binding                                                                                                                                                                                                                        | nucleosome assembly                                                                                                                                                                                                                                                                                                           |
| histone cluster 2, H2be                         | Hist2h2be | NP_835586    | 14       | 20            | chromosome, nucleosome, nucleus                                                                                                                                                                               | DNA binding, protein binding                                                                                                                                                                                                       | nucleosome assembly                                                                                                                                                                                                                                                                                                           |

| Protein Name                                            | Gene Name | Accession No | Mw (kDa) | Peptide Count | GO Component                                                                                                            | GO Function                                                                                                                                                                                                                                                                                             | GO Process                                                                                                                                                                  |
|---------------------------------------------------------|-----------|--------------|----------|---------------|-------------------------------------------------------------------------------------------------------------------------|---------------------------------------------------------------------------------------------------------------------------------------------------------------------------------------------------------------------------------------------------------------------------------------------------------|-----------------------------------------------------------------------------------------------------------------------------------------------------------------------------|
| DEAD (Asp-Glu-Ala-Asp) box polypeptide 5                | Ddx5      | NP_031866    | 69       | 19            | nucleus, ribonucleoprotein complex, spliceosomal complex                                                                | ATP binding, ATP-dependent helicase activity, helicase activity, hydrolase activity, hydrolase activity, acting on acid anhydrides, in phosphorus-containing anhydrides, nucleic acid binding, nucleotide binding, protein binding, RNA binding, RNA helicase activity, transcription cofactor activity | mRNA processing, positive regulation of transcription, RNA splicing                                                                                                         |
| golgi apparatus protein 1                               | Glg1      | NP_033175    | 134      | 19            | Golgi apparatus, Golgi membrane, integral to membrane, membrane, plasma membrane                                        | sugar binding                                                                                                                                                                                                                                                                                           | not classified                                                                                                                                                              |
| voltage-dependent anion channel 3                       | Vdac3     | NP_035826    | 31       | 19            | integral to membrane, membrane, mitochondrial inner membrane, mitochondrial outer membrane, mitochondrion, pore complex | nucleotide binding, voltage-gated anion channel activity                                                                                                                                                                                                                                                | anion transport, behavioral fear response, ion transport, learning, nerve-nerve synaptic transmission, synaptic transmission, transport                                     |
| heterogeneous nuclear ribonucleoprotein A2/B1 isoform 1 | Hnrnpa2b1 | NP_058086    | 36       | 19            | cytoplasm, nucleus, ribonucleoprotein complex, spliceosomal complex                                                     | nucleic acid binding, nucleotide binding, protein binding, RNA binding                                                                                                                                                                                                                                  | mRNA processing, RNA splicing                                                                                                                                               |
| ubiquinol cytochrome c reductase core protein 2         | Uqcrc2    | NP_080175    | 48       | 19            | membrane, mitochondrial inner membrane, mitochondrion, respiratory chain                                                | catalytic activity, metal ion binding, metalloendopeptidase activity, zinc ion binding                                                                                                                                                                                                                  | electron transport chain, proteolysis, transport                                                                                                                            |
| inner membrane protein, mitochondrial                   | Immt      | NP_083949    | 84       | 19            | integral to membrane, integral to mitochondrial inner membrane, membrane, mitochondrial inner membrane, mitochondrion   | molecular_function                                                                                                                                                                                                                                                                                      | biological_process                                                                                                                                                          |
| lactate dehydrogenase B                                 | Ldhb      | NP_032518    | 37       | 18            | cytoplasm                                                                                                               | catalytic activity, L-lactate dehydrogenase activity, oxidoreductase activity, oxidoreductase activity, acting on the CH-OH group of donors, NAD or NADP as acceptor                                                                                                                                    | anaerobic glycolysis, carbohydrate metabolic process, cellular carbohydrate metabolic process, glycolysis, oxidation reduction                                              |
| lymphocyte cytosolic protein 1                          | Lcp1      | NP_032905    | 70       | 18            | actin filament, cytoplasm, phagocytic cup, ruffle                                                                       | actin binding, actin filament binding, calcium ion binding, identical protein binding, protein binding                                                                                                                                                                                                  | actin filament bundle formation, response to wounding                                                                                                                       |
| spectrin beta 2 isoform 2                               | Spnb2     | NP_033286    | 251      | 18            | cortical cytoskeleton, cytoplasm, cytoskeleton, membrane, nucleus, plasma membrane, spectrin                            | actin binding, calmodulin binding, protein binding, structural constituent of cytoskeleton                                                                                                                                                                                                              | actin filament capping, common-partner SMAD protein phosphorylation, SMAD protein nuclear translocation                                                                     |
| lactate dehydrogenase A                                 | Ldha      | NP_034829    | 36       | 18            | cytoplasm, cytosol, flagellum                                                                                           | catalytic activity, L-lactate dehydrogenase activity, oxidoreductase activity, oxidoreductase activity, acting on the CH-OH group of donors, NAD or NADP as acceptor, protein binding                                                                                                                   | anaerobic glycolysis, carbohydrate metabolic process, cellular carbohydrate metabolic process, cellular response to extracellular stimulus, glycolysis, oxidation reduction |

| Protein Name                                         | Gene Name | Accession No | Mw (kDa) | Peptide Count | GO Component                                                             | GO Function                                                                                                                                                                                                                                                                                                                           | GO Process                                                                                                                                                                                                                                           |
|------------------------------------------------------|-----------|--------------|----------|---------------|--------------------------------------------------------------------------|---------------------------------------------------------------------------------------------------------------------------------------------------------------------------------------------------------------------------------------------------------------------------------------------------------------------------------------|------------------------------------------------------------------------------------------------------------------------------------------------------------------------------------------------------------------------------------------------------|
| oxoglutarate dehydrogenase (lipoamide)               | Ogdh      | NP_035086    | 116      | 18            | mitochondrion                                                            | oxidoreductase activity, oxidoreductase activity, acting on the aldehyde or oxo group of donors, disulfide as acceptor, oxoglutarate dehydrogenase (NAD+) activity, oxoglutarate dehydrogenase (succinyl-transferring) activity, thiamin pyrophosphate binding                                                                        | glycolysis, metabolic process, oxidation reduction                                                                                                                                                                                                   |
| annexin A4                                           | Anxa4     | NP_038499    | 36       | 18            | apical plasma membrane                                                   | calcium ion binding, calcium-dependent phospholipid binding                                                                                                                                                                                                                                                                           | kidney development                                                                                                                                                                                                                                   |
| carboxylesterase 3                                   | Ces3      | NP_444430    | 62       | 18            | endoplasmic reticulum                                                    | carboxylesterase activity, fatty-acyl-ethyl-ester synthase activity, hydrolase activity                                                                                                                                                                                                                                               | acyl-CoA metabolic process, response to toxin                                                                                                                                                                                                        |
| heterogeneous nuclear ribonucleoprotein A3 isoform c | Hnrnpa3   | NP_444493    | 37       | 18            | nucleus, ribonucleoprotein complex, spliceosomal complex                 | nucleic acid binding, nucleotide binding, RNA binding                                                                                                                                                                                                                                                                                 | mRNA processing, RNA splicing                                                                                                                                                                                                                        |
| argininosuccinate lyase                              | Asl       | NP_598529    | 52       | 18            | not classified                                                           | argininosuccinate lyase activity, catalytic activity, lyase activity                                                                                                                                                                                                                                                                  | ammonia assimilation cycle, arginine biosynthetic process, arginine biosynthetic process via ornithine, cellular amino acid biosynthetic process, cellular amino acid metabolic process, locomotory behavior, post-embryonic development, urea cycle |
| NADH dehydrogenase (ubiquinone) Fe-S protein 1       | Ndufs1    | NP_663493    | 80       | 18            | membrane, mitochondrial inner membrane, mitochondrion, respiratory chain | 2 iron, 2 sulfur cluster binding, 4 iron, 4 sulfur cluster binding, electron carrier activity, iron ion binding, iron-sulfur cluster binding, metal ion binding, molecular function, NADH dehydrogenase (ubiquinone) activity, NADH dehydrogenase activity, oxidoreductase activity, oxidoreductase activity, acting on NADH or NADPH | ATP synthesis coupled electron transport, biological process, electron transport chain, oxidation reduction, transport                                                                                                                               |
| mitochondrial trifunctional protein, beta subunit    | Hadhb     | NP_663533    | 51       | 18            | mitochondrial inner membrane, mitochondrion                              | acetyl-CoA C-acyltransferase activity, acyltransferase activity, transferase activity, transferase activity, transferring acyl groups other than amino-acyl groups                                                                                                                                                                    | fatty acid beta-oxidation, fatty acid metabolic process, lipid metabolic process, metabolic process                                                                                                                                                  |

| Protein Name                                                       | Gene Name | Accession No | Mw (kDa) | Peptide Count | GO Component                                                                                                                                                             | GO Function                                                                                                                                                                                                                                                                                                                                                                          | GO Process                                                                                                                                                                                                                                                                                                                                                                                                                                                                                                                                                                                                                                                                                                                    |
|--------------------------------------------------------------------|-----------|--------------|----------|---------------|--------------------------------------------------------------------------------------------------------------------------------------------------------------------------|--------------------------------------------------------------------------------------------------------------------------------------------------------------------------------------------------------------------------------------------------------------------------------------------------------------------------------------------------------------------------------------|-------------------------------------------------------------------------------------------------------------------------------------------------------------------------------------------------------------------------------------------------------------------------------------------------------------------------------------------------------------------------------------------------------------------------------------------------------------------------------------------------------------------------------------------------------------------------------------------------------------------------------------------------------------------------------------------------------------------------------|
| myosin heavy chain 10, non-muscle                                  | Myh10     | NP_780469    | 229      | 18            | axon, cell cortex, cell soma, cytoplasm, dendritic spine, growth cone, myosin complex, neuromuscular junction, neuron projection, plasma membrane, spindle, stress fiber | actin binding, actin filament binding, actin-dependent ATPase activity, ADP binding, ATP binding, calmodulin binding, microfilament motor activity, motor activity, nucleotide binding, protein binding                                                                                                                                                                              | actin cytoskeleton organization, actin filament-based movement, adult heart development, axon guidance, axonogenesis, brain development, cardiac myofibril assembly, cell proliferation, cerebellar Purkinje cell layer development, cytokinesis after mitosis, exocytosis, fourth ventricle development, in utero embryonic development, lateral ventricle development, myofibril assembly, neuromuscular process controlling balance, neuron migration, neuron projection development, nuclear migration, plasma membrane repair, regulation of cell shape, retina development in camera-type eye, substrate-bound cell migration, cell extension, third ventricle development, ventricular cardiac muscle cell development |
| PREDICTED: similar to vesicle associated protein                   | Sec31a    | XP_912694    | 144      | 18            | cytoplasm, cytoplasmic vesicle, endoplasmic reticulum, endosome, membrane                                                                                                | not classified                                                                                                                                                                                                                                                                                                                                                                       | protein transport, transport, vesicle-mediated transport                                                                                                                                                                                                                                                                                                                                                                                                                                                                                                                                                                                                                                                                      |
| UbiE-YGHL1 fusion protein                                          | LOC554292 | NP_001019843 | 30       | 17            | not classified                                                                                                                                                           | not classified                                                                                                                                                                                                                                                                                                                                                                       | not classified                                                                                                                                                                                                                                                                                                                                                                                                                                                                                                                                                                                                                                                                                                                |
| ATPase, Ca++ transporting, cardiac muscle, slow twitch 2 isoform a | Atp2a2    | NP_001103610 | 115      | 17            | endoplasmic reticulum, integral to membrane, membrane, membrane fraction, microsome, sarcoplasmic reticulum                                                              | ATP binding, ATPase activity, coupled to transmembrane movement of ions, phosphorylative mechanism, calcium ion binding, calcium-transporting ATPase activity, catalytic activity, hydrolase activity, hydrolase activity, acting on acid anhydrides, catalyzing transmembrane movement of substances, magnesium ion binding, metal ion binding, nucleotide binding, protein binding | ATP biosynthetic process, calcium ion transport, cation transport, cellular calcium ion homeostasis, ER-nuclear signaling pathway, ion transport, metabolic process, negative regulation of heart contraction, regulation of muscle contraction, regulation of the force of heart contraction, transport                                                                                                                                                                                                                                                                                                                                                                                                                      |
| peroxiredoxin 6                                                    | Prdx6     | NP_031479    | 25       | 17            | cytoplasm, cytosol, lysosome                                                                                                                                             | antioxidant activity, catalytic activity, hydrolase activity, oxidoreductase activity, peroxidase activity, peroxiredoxin activity                                                                                                                                                                                                                                                   | bleb formation, cell redox homeostasis, lipid catabolic process, oxidation reduction, response to reactive oxygen species                                                                                                                                                                                                                                                                                                                                                                                                                                                                                                                                                                                                     |
| serine (or cysteine) proteinase inhibitor, clade B, member 9       | Serpinb9  | NP_033282    | 42       | 17            | not classified                                                                                                                                                           | protein binding                                                                                                                                                                                                                                                                                                                                                                      | anti-apoptosis                                                                                                                                                                                                                                                                                                                                                                                                                                                                                                                                                                                                                                                                                                                |
| ubiquitin-activating enzyme E1                                     | Uba1      | NP_033483    | 118      | 17            | not classified                                                                                                                                                           | ATP binding, binding, catalytic activity, ligase activity, nucleotide binding, small protein activating enzyme activity                                                                                                                                                                                                                                                              | metabolic process, modification-dependent protein catabolic process, protein modification process                                                                                                                                                                                                                                                                                                                                                                                                                                                                                                                                                                                                                             |
| annexin A5                                                         | Anxa5     | NP_033803    | 36       | 17            | not classified                                                                                                                                                           | calcium ion binding, calcium-dependent phospholipid binding, eukaryotic cell surface binding, protein binding                                                                                                                                                                                                                                                                        | blood coagulation, negative regulation of coagulation, response to organic substance                                                                                                                                                                                                                                                                                                                                                                                                                                                                                                                                                                                                                                          |

| Protein Name                                                               | Gene Name | Accession No | Mw (kDa) | Peptide Count | GO Component                                                                                                                                                                                          | GO Function                                                                                                                                                                                                                            | GO Process                                                                                                                                                                                                                                                                                                                          |
|----------------------------------------------------------------------------|-----------|--------------|----------|---------------|-------------------------------------------------------------------------------------------------------------------------------------------------------------------------------------------------------|----------------------------------------------------------------------------------------------------------------------------------------------------------------------------------------------------------------------------------------|-------------------------------------------------------------------------------------------------------------------------------------------------------------------------------------------------------------------------------------------------------------------------------------------------------------------------------------|
| coatomer protein complex subunit alpha                                     | Copa      | NP_034068    | 139      | 17            | COP1 vesicle coat, cytoplasm, cytoplasmic vesicle, extracellular region, extracellular space, Golgi apparatus, membrane, membrane coat, microsome, soluble fraction                                   | hormone activity, protein binding, structural molecule activity                                                                                                                                                                        | intracellular protein transport, pancreatic juice secretion, protein transport, transport, vesicle-mediated transport                                                                                                                                                                                                               |
| solute carrier family 9 (sodium/hydrogen exchanger), isoform 3 regulator 1 | Slc9a3r1  | NP_036160    | 39       | 17            | apical part of cell, apical plasma membrane, membrane                                                                                                                                                 | protein binding                                                                                                                                                                                                                        | cAMP-mediated signaling, cellular phosphate ion homeostasis, Wnt receptor signaling pathway                                                                                                                                                                                                                                         |
| B-cell receptor-associated protein 37                                      | Phb2      | NP_031557    | 33       | 16            | cytoplasm, membrane, mitochondrial inner membrane, mitochondrion, nucleus                                                                                                                             | protein binding, receptor activity, specific transcriptional repressor activity                                                                                                                                                        | mammary gland alveolus development, mammary gland branching involved in thelarche, negative regulation of estrogen receptor signaling pathway, negative regulation of mammary gland epithelial cell proliferation, regulation of branching involved in mammary gland duct morphogenesis, regulation of transcription, transcription |
| ribosomal protein SA                                                       | Rpsa      | NP_035159    | 33       | 16            | cytoplasm, intracellular, membrane, membrane fraction, nucleus, plasma membrane, ribonucleoprotein complex, ribosome, small ribosomal subunit                                                         | laminin binding, receptor activity, structural constituent of ribosome                                                                                                                                                                 | translation                                                                                                                                                                                                                                                                                                                         |
| heterogeneous nuclear ribonucleoprotein U                                  | Hnrnpu    | NP_058085    | 88       | 16            | ribonucleoprotein complex                                                                                                                                                                             | nucleic acid binding                                                                                                                                                                                                                   | not classified                                                                                                                                                                                                                                                                                                                      |
| keratin 5                                                                  | Krt5      | NP_081287    | 62       | 16            | intermediate filament, keratin filament                                                                                                                                                               | protein binding, structural molecule activity                                                                                                                                                                                          | not classified                                                                                                                                                                                                                                                                                                                      |
| actinin, alpha 1                                                           | Actn1     | NP_598917    | 103      | 16            | actin cytoskeleton, cortical cytoskeleton, cytoplasm, cytoskeleton, dense core granule membrane, focal adhesion, secretory granule, stress fiber, Z disc                                              | actin binding, actin filament binding, calcium ion binding, protein binding, protein homodimerization activity                                                                                                                         | actin filament bundle formation, cortical cytoskeleton organization                                                                                                                                                                                                                                                                 |
| prominin 2 isoform 1                                                       | Prom2     | NP_620089    | 93       | 16            | cell projection, cilium, integral to membrane, membrane, plasma membrane                                                                                                                              | not classified                                                                                                                                                                                                                         | not classified                                                                                                                                                                                                                                                                                                                      |
| histone cluster 2, H2bb                                                    | Hist2h2bb | NP_783597    | 14       | 16            | chromosome, nucleosome, nucleus                                                                                                                                                                       | DNA binding                                                                                                                                                                                                                            | not classified                                                                                                                                                                                                                                                                                                                      |
| a disintegrin and metalloprotease domain 7                                 | Adam7     | NP_031428    | 89       | 15            | integral to membrane, membrane, plasma membrane                                                                                                                                                       | metalloendopeptidase activity, zinc ion binding                                                                                                                                                                                        | proteolysis                                                                                                                                                                                                                                                                                                                         |
| ATPase, H+ transporting, lysosomal V1 subunit A                            | Atp6v1a   | NP_031534    | 68       | 15            | cytosol, mitochondrion, plasma membrane, proton-transporting two-sector ATPase complex, proton-transporting two-sector ATPase complex, catalytic domain, proton-transporting V-type ATPase, V1 domain | ATP binding, hydrogen ion transporting ATP synthase activity, rotational mechanism, hydrolase activity, catalyzing transmembrane movement of substances, nucleotide binding, proton-transporting ATPase activity, rotational mechanism | ATP metabolic process, ATP synthesis coupled proton transport, ion transport, proton transport, transport                                                                                                                                                                                                                           |
| glutathione peroxidase 5                                                   | Gpx5      | NP_034473    | 25       | 15            | extracellular region                                                                                                                                                                                  | glutathione peroxidase activity, oxidoreductase activity, peroxidase activity                                                                                                                                                          | oxidation reduction, response to oxidative stress                                                                                                                                                                                                                                                                                   |

| Protein Name                                                       | Gene Name    | Accession No | Mw (kDa) | Peptide Count | GO Component                                                                                                                          | GO Function                                                                                                                                                                                    | GO Process                                                                                                                                                                              |
|--------------------------------------------------------------------|--------------|--------------|----------|---------------|---------------------------------------------------------------------------------------------------------------------------------------|------------------------------------------------------------------------------------------------------------------------------------------------------------------------------------------------|-----------------------------------------------------------------------------------------------------------------------------------------------------------------------------------------|
| lamin B1                                                           | Lmnb1        | NP_034851    | 67       | 15            | intermediate filament, lamin filament, membrane, nucleus                                                                              | structural molecule activity                                                                                                                                                                   | not classified                                                                                                                                                                          |
| ATP synthase, H+ transporting, mitochondrial F1 complex, O subunit | Atp5o        | NP_613063    | 23       | 15            | membrane, mitochondrial inner membrane, mitochondrion, plasma membrane, proton-transporting ATP synthase complex, catalytic core F(1) | hydrogen ion transporting ATP synthase activity, rotational mechanism                                                                                                                          | ATP biosynthetic process, ATP synthesis coupled proton transport, ion transport, proton transport, transport                                                                            |
| PREDICTED: similar to aldehyde reductase                           | LOC100044692 | XP_001472913 | 33       | 15            | not classified                                                                                                                        | not classified                                                                                                                                                                                 | not classified                                                                                                                                                                          |
| aconitase 1                                                        | Aco1         | NP_031412    | 98       | 14            | cytoplasm, cytosol, endoplasmic reticulum, Golgi apparatus                                                                            | 4 iron, 4 sulfur cluster binding, aconitate hydratase activity, iron ion binding, iron-responsive element binding, iron-sulfur cluster binding, lyase activity, metal ion binding, RNA binding | cellular iron ion homeostasis, intestinal absorption, metabolic process, post-embryonic development, regulation of gene expression, regulation of translation, tricarboxylic acid cycle |
| dolichyl-di-phosphooligosaccharide-protein glycotransferase        | Ddost        | NP_031864    | 49       | 14            | endoplasmic reticulum, endoplasmic reticulum membrane, integral to membrane, membrane                                                 | dolichyl-diphosphooligosaccharide protein glycotransferase activity, transferase activity                                                                                                      | protein amino acid N-linked glycosylation via asparagine                                                                                                                                |
| alpha glucosidase 2 alpha neutral subunit                          | Ganab        | NP_032086    | 109      | 14            | alpha-glucosidase II complex, endoplasmic reticulum, Golgi apparatus                                                                  | glucan 1,3-alpha-glucosidase activity, glucosidase activity, hydrolase activity, hydrolyzing O-glycosyl compounds, protein binding                                                             | carbohydrate metabolic process, N-glycan processing                                                                                                                                     |
| solute carrier family 16, member 1                                 | Slc16a1      | NP_033222    | 53       | 14            | integral to membrane, membrane, plasma membrane                                                                                       | secondary active monocarboxylate transmembrane transporter activity, symporter activity                                                                                                        | organic anion transport, transport                                                                                                                                                      |
| RAN, member RAS oncogene family                                    | Ran          | NP_033417    | 24       | 14            | cytoplasm, nucleus                                                                                                                    | GTP binding, GTPase activity, nucleotide binding, protein binding                                                                                                                              | cell cycle, cell division, intracellular protein transport, mitosis, nucleocytoplasmic transport, protein import into nucleus, protein transport, signal transduction, transport        |
| RNA binding motif protein, X-linked                                | Rbmx         | NP_035382    | 42       | 14            | ribonucleoprotein complex                                                                                                             | nucleic acid binding                                                                                                                                                                           | not classified                                                                                                                                                                          |
| ribosomal protein S18                                              | Rps18        | NP_035426    | 18       | 14            | cytoplasm, intracellular, ribonucleoprotein complex, ribosome                                                                         | RNA binding, rRNA binding, structural constituent of ribosome                                                                                                                                  | translation                                                                                                                                                                             |
| tubulin, beta 5                                                    | Tubb5        | NP_035785    | 50       | 14            | cytosol, microtubule, protein complex, tubulin complex                                                                                | GTP binding, GTPase activity, nucleotide binding, structural constituent of cytoskeleton, structural molecule activity                                                                         | microtubule-based movement, microtubule-based process, protein polymerization, spindle assembly                                                                                         |
| peroxiredoxin 5 precursor                                          | Prdx5        | NP_036151    | 22       | 14            | cytoplasm, mitochondrion, peroxisome                                                                                                  | antioxidant activity, oxidoreductase activity, peroxidase activity, peroxiredoxin activity                                                                                                     | cell redox homeostasis, oxidation reduction                                                                                                                                             |
| progesterone receptor membrane component                           | Pgrmc1       | NP_058063    | 22       | 14            | endoplasmic reticulum, integral to membrane, membrane, microsomes                                                                     | heme binding, lipid binding, receptor activity, steroid binding                                                                                                                                | not classified                                                                                                                                                                          |

| Protein Name                                        | Gene Name | Accession No | Mw (kDa) | Peptide Count | GO Component                                                                                                                            | GO Function                                                                                                                                                                                                                 | GO Process                                                                                                                                                                                                                                                                                                                                                                                                                                                                       |
|-----------------------------------------------------|-----------|--------------|----------|---------------|-----------------------------------------------------------------------------------------------------------------------------------------|-----------------------------------------------------------------------------------------------------------------------------------------------------------------------------------------------------------------------------|----------------------------------------------------------------------------------------------------------------------------------------------------------------------------------------------------------------------------------------------------------------------------------------------------------------------------------------------------------------------------------------------------------------------------------------------------------------------------------|
| 3-phosphoglycerate dehydrogenase                    | Phgdh     | NP_058662    | 57       | 14            | not classified                                                                                                                          | binding, catalytic activity, cofactor binding, NAD or NADH binding, oxidoreductase activity, oxidoreductase activity, acting on the CH-OH group of donors, NAD or NADP as acceptor, phosphoglycerate dehydrogenase activity | cell cycle process, cellular amino acid biosynthetic process, gamma-aminobutyric acid metabolic process, glial cell development, glutamine metabolic process, glycine metabolic process, L-serine biosynthetic process, L-serine metabolic process, metabolic process, neural tube development, neurogenesis, neuron projection development, oxidation reduction, regulation of gene expression, spinal cord development, taurine metabolic process, threonine metabolic process |
| N-acylsphingosine amidohydrolase 1                  | Asah1     | NP_062708    | 45       | 14            | lysosome                                                                                                                                | ceramidase activity, hydrolase activity                                                                                                                                                                                     | lipid metabolic process                                                                                                                                                                                                                                                                                                                                                                                                                                                          |
| succinate dehydrogenase Fp subunit                  | Sdha      | NP_075770    | 73       | 14            | membrane, mitochondrial inner membrane, mitochondrion                                                                                   | electron carrier activity, FAD binding, oxidoreductase activity, oxidoreductase activity, acting on the CH-CH group of donors, succinate dehydrogenase (ubiquinone) activity                                                | electron transport chain, oxidation reduction, transport, tricarboxylic acid cycle                                                                                                                                                                                                                                                                                                                                                                                               |
| leucine aminopeptidase 3                            | Lap3      | NP_077754    | 56       | 14            | cytoplasm, intracellular, mitochondrion                                                                                                 | aminopeptidase activity, hydrolase activity, magnesium ion binding, manganese ion binding, metal ion binding, metalloexopeptidase activity, peptidase activity, zinc ion binding                                            | protein metabolic process, proteolysis                                                                                                                                                                                                                                                                                                                                                                                                                                           |
| diaphorase 1                                        | Cyb5r3    | NP_084063    | 34       | 14            | cytoplasm, endoplasmic reticulum, membrane, mitochondrial inner membrane, mitochondrial outer membrane, mitochondrion, soluble fraction | cytochrome-b5 reductase activity, electron carrier activity, oxidoreductase activity                                                                                                                                        | cholesterol biosynthetic process, lipid biosynthetic process, oxidation reduction, steroid biosynthetic process, sterol biosynthetic process                                                                                                                                                                                                                                                                                                                                     |
| ER lipid raft associated 2                          | Erlin2    | NP_705820    | 38       | 14            | endoplasmic reticulum, integral to membrane, membrane                                                                                   | not classified                                                                                                                                                                                                              | not classified                                                                                                                                                                                                                                                                                                                                                                                                                                                                   |
| synaptic nuclear envelope 2                         | Syne2     | NP_001005510 | 783      | 13            | myofibril, nuclear envelope, Z disc                                                                                                     | actin binding, molecular_function                                                                                                                                                                                           | establishment or maintenance of cell polarity, fibroblast migration, nuclear envelope organization, protein localization in nucleus                                                                                                                                                                                                                                                                                                                                              |
| heterogeneous nuclear ribonucleoprotein D isoform b | Hnrnpd    | NP_001070734 | 36       | 13            | chromosome, nucleus, ribonucleoprotein complex                                                                                          | DNA binding, nucleic acid binding, nucleotide binding, protein binding, RNA binding                                                                                                                                         | regulation of mRNA stability, regulation of transcription, transcription                                                                                                                                                                                                                                                                                                                                                                                                         |
| acyl-CoA synthetase long-chain family member 1      | Acs1      | NP_032007    | 78       | 13            | endoplasmic reticulum, integral to membrane, membrane, microsome, mitochondrial outer membrane, mitochondrion, peroxisome               | acetate-CoA ligase (ADP-forming) activity, ATP binding, catalytic activity, ligase activity, long-chain-fatty-acid-CoA ligase activity, magnesium ion binding, molecular_function, nucleotide binding                       | biological_process, fatty acid metabolic process, lipid metabolic process, metabolic process                                                                                                                                                                                                                                                                                                                                                                                     |

| Protein Name                  | Gene Name | Accession No | Mw (kDa) | Peptide Count | GO Component                                                                                                   | GO Function                                                                                                                                                                                                                                                              | GO Process                                                                                                                                                                                                                                                                                                                                                                                                                                                                                                                                                                                                                                                         |
|-------------------------------|-----------|--------------|----------|---------------|----------------------------------------------------------------------------------------------------------------|--------------------------------------------------------------------------------------------------------------------------------------------------------------------------------------------------------------------------------------------------------------------------|--------------------------------------------------------------------------------------------------------------------------------------------------------------------------------------------------------------------------------------------------------------------------------------------------------------------------------------------------------------------------------------------------------------------------------------------------------------------------------------------------------------------------------------------------------------------------------------------------------------------------------------------------------------------|
| hemoglobin alpha 1 chain      | Hba-a1    | NP_032244    | 15       | 13            | hemoglobin complex                                                                                             | heme binding, iron ion binding, metal ion binding, oxygen binding, oxygen transporter activity                                                                                                                                                                           | erythrocyte development, in utero embryonic development, oxygen transport, transport                                                                                                                                                                                                                                                                                                                                                                                                                                                                                                                                                                               |
| AHNAK nucleoprotein isoform 1 | Ahnak     | NP_033773    | 604      | 13            | cell-cell junction                                                                                             | not classified                                                                                                                                                                                                                                                           | not classified                                                                                                                                                                                                                                                                                                                                                                                                                                                                                                                                                                                                                                                     |
| hexosaminidase B              | Hexb      | NP_034552    | 61       | 13            | acrosomal vesicle, lysosome, membrane                                                                          | beta-N-acetylhexosaminidase activity, catalytic activity, cation binding, hydrolase activity, hydrolase activity, acting on glycosyl bonds, hydrolase activity, hydrolyzing O-glycosyl compounds, protein heterodimerization activity, protein homodimerization activity | carbohydrate metabolic process, cellular calcium ion homeostasis, cellular protein metabolic process, ganglioside catabolic process, glycosaminoglycan metabolic process, glycosphingolipid metabolic process, lipid storage, locomotory behavior, lysosome organization, male courtship behavior, metabolic process, myelination, neuromuscular process, neuromuscular process controlling balance, oligosaccharide catabolic process, oogenesis, penetration of zona pellucida, phospholipid biosynthetic process, regulation of cellular metabolic process, sensory perception of sound, sexual reproduction, single fertilization, skeletal system development |
| high mobility group box 1     | Hmgb1     | NP_034569    | 25       | 13            | chromosome, cytoplasm, extracellular space, neuron projection, nucleus, soluble fraction                       | bent DNA binding, calcium-dependent protein kinase regulator activity, crossed form four-way junction DNA binding, cytokine activity, DNA binding, heparin binding, open form four-way junction DNA binding, protein kinase activator activity                           | DNA geometric change, eye development, induction of positive chemotaxis, lung development, positive regulation of cell migration, positive regulation of gene-specific transcription from RNA polymerase II promoter, positive regulation of glycogen catabolic process, positive regulation of mesenchymal cell proliferation, positive regulation of mitotic cell cycle, positive regulation of myeloid cell differentiation, positive regulation of protein amino acid phosphorylation, response to glucocorticoid stimulus                                                                                                                                     |
| myosin IB                     | Myo1b     | NP_034993    | 129      | 13            | myosin complex                                                                                                 | actin binding, ATP binding, calmodulin binding, motor activity, nucleotide binding                                                                                                                                                                                       | not classified                                                                                                                                                                                                                                                                                                                                                                                                                                                                                                                                                                                                                                                     |
| ribosomal protein L6          | Rpl6      | NP_035420    | 34       | 13            | cytoplasm, intracellular, nucleolus, nucleus, ribonucleoprotein complex, ribosome                              | molecular_function, structural constituent of ribosome                                                                                                                                                                                                                   | biological_process, translation                                                                                                                                                                                                                                                                                                                                                                                                                                                                                                                                                                                                                                    |
| ribosomal protein L7          | Rpl7      | NP_035421    | 31       | 13            | cytosolic large ribosomal subunit, intracellular, large ribosomal subunit, ribonucleoprotein complex, ribosome | DNA binding, mRNA binding, protein homodimerization activity, RNA binding, structural constituent of ribosome, transcription regulator activity                                                                                                                          | translation                                                                                                                                                                                                                                                                                                                                                                                                                                                                                                                                                                                                                                                        |



| Protein Name                          | Gene Name | Accession No | Mw (kDa) | Peptide Count | GO Component                                                                                                                                 | GO Function                                                                                                                                                                                                                                                                                           | GO Process                                                                                                                                                                                                                                                                                                                                                                                                                                                                                                                                                                                                                                                                                                                                                                                                                                                                                                                                      |
|---------------------------------------|-----------|--------------|----------|---------------|----------------------------------------------------------------------------------------------------------------------------------------------|-------------------------------------------------------------------------------------------------------------------------------------------------------------------------------------------------------------------------------------------------------------------------------------------------------|-------------------------------------------------------------------------------------------------------------------------------------------------------------------------------------------------------------------------------------------------------------------------------------------------------------------------------------------------------------------------------------------------------------------------------------------------------------------------------------------------------------------------------------------------------------------------------------------------------------------------------------------------------------------------------------------------------------------------------------------------------------------------------------------------------------------------------------------------------------------------------------------------------------------------------------------------|
| sterol carrier protein 2, liver       | Scp2      | NP_035457    | 59       | 13            | cytoplasm, mitochondrion, peroxisome                                                                                                         | catalytic activity, lipid binding, oxidoreductase activity, propanoyl-CoA C-acyltransferase activity, protein binding, sterol carrier activity, sterol carrier protein X-related thiolase activity, transferase activity, transferase activity, transferring acyl groups other than amino-acyl groups | acyl-CoA metabolic process, lipid transport, metabolic process, peroxisome organization, transport                                                                                                                                                                                                                                                                                                                                                                                                                                                                                                                                                                                                                                                                                                                                                                                                                                              |
| tryptophanyl-tRNA synthetase          | Wars      | NP_035840    | 54       | 13            | cytoplasm                                                                                                                                    | aminoacyl-tRNA ligase activity, ATP binding, ligase activity, nucleotide binding, tryptophan-tRNA ligase activity                                                                                                                                                                                     | translation, tRNA aminoacylation for protein translation, tryptophanyl-tRNA aminoacylation                                                                                                                                                                                                                                                                                                                                                                                                                                                                                                                                                                                                                                                                                                                                                                                                                                                      |
| superoxide dismutase 2, mitochondrial | Sod2      | NP_038699    | 25       | 13            | mitochondrial inner membrane, mitochondrion                                                                                                  | manganese ion binding, metal ion binding, oxidoreductase activity, superoxide dismutase activity                                                                                                                                                                                                      | age-dependent response to oxidative stress, apoptosis, detection of oxygen, double-strand break repair, erythropoiesis, differentiation, glutathione metabolic process, heart development, hemoiesis, iron ion homeostasis, liver development, locomotory behavior, mitochondrion organization, negative regulation of apoptosis, negative regulation of fat cell differentiation, negative regulation of fibroblast proliferation, neuron development, oxidation reduction, positive regulation of nitric oxide biosynthetic process, post-embryonic development, regulation of blood pressure, regulation of catalytic activity, regulation of mitochondrial membrane potential, release of cytochrome c from mitochondria, removal of superoxide radicals, respiratory electron transport chain, response to activity, response to axon injury, response to gamma radiation, response to hydrogen peroxide, response to hypoxia, response to |
| ribophorin II                         | Rpn2      | NP_062616    | 69       | 13            | cellular_component, endoplasmic reticulum, endoplasmic reticulum membrane, integral to membrane, membrane, oligosaccharyltransferase complex | dolichyl-diphosphooligosaccharide protein glycotransferase activity, molecular_function, transferase activity                                                                                                                                                                                         | biological_process, protein amino acid N-linked glycosylation via asparagine                                                                                                                                                                                                                                                                                                                                                                                                                                                                                                                                                                                                                                                                                                                                                                                                                                                                    |
| phosphoglycerate mutase 1             | Pgam1     | NP_075907    | 29       | 13            | not classified                                                                                                                               | 2,3-bisphospho-D-glycerate 2-phosphohydrolase activity, bisphosphoglycerate mutase activity, catalytic activity, hydrolase activity, intramolecular transferase activity, phosphotransferases, isomerase activity, phosphoglycerate mutase activity                                                   | glycolysis, metabolic process                                                                                                                                                                                                                                                                                                                                                                                                                                                                                                                                                                                                                                                                                                                                                                                                                                                                                                                   |

| Protein Name                                                                             | Gene Name | Accession No | Mw (kDa) | Peptide Count | GO Component                                                                        | GO Function                                                                                                                                                                                                                                                                            | GO Process                                                                                                                                 |
|------------------------------------------------------------------------------------------|-----------|--------------|----------|---------------|-------------------------------------------------------------------------------------|----------------------------------------------------------------------------------------------------------------------------------------------------------------------------------------------------------------------------------------------------------------------------------------|--------------------------------------------------------------------------------------------------------------------------------------------|
| splicing factor proline/glutamine rich (polypyrimidine tract binding protein associated) | Sfpq      | NP_076092    | 75       | 13            | cellular_component, nucleus                                                         | DNA binding, nucleic acid binding, nucleotide binding, RNA binding                                                                                                                                                                                                                     | biological_process, DNA repair, mRNA processing, regulation of transcription, response to DNA damage stimulus, RNA splicing, transcription |
| aldo-keto reductase family 7, member A5 (aflatoxin aldehyde reductase)                   | Akr7a5    | NP_079613    | 41       | 13            | Golgi apparatus, mitochondrion                                                      | oxidoreductase activity                                                                                                                                                                                                                                                                | oxidation reduction                                                                                                                        |
| citrate synthase                                                                         | Cs        | NP_080720    | 52       | 13            | mitochondrion                                                                       | citrate (S)-synthase activity, protein binding, transferase activity, transferring acyl groups, acyl groups converted into alkyl on transfer                                                                                                                                           | cellular carbohydrate metabolic process, tricarboxylic acid cycle                                                                          |
| glutathione S-transferase, mu 7                                                          | Gstm7     | NP_080948    | 26       | 13            | cytoplasm                                                                           | glutathione transferase activity, transferase activity                                                                                                                                                                                                                                 | metabolic process                                                                                                                          |
| thioredoxin domain containing 4                                                          | Txndc4    | NP_083848    | 47       | 13            | endoplasmic reticulum, endoplasmic reticulum lumen                                  | not classified                                                                                                                                                                                                                                                                         | cell redox homeostasis, response to unfolded protein                                                                                       |
| NADH dehydrogenase (ubiquinone) flavoprotein 1                                           | Ndufv1    | NP_598427    | 51       | 13            | membrane, mitochondrial inner membrane, mitochondrion, respiratory chain            | 4 iron, 4 sulfur cluster binding, FMN binding, iron ion binding, iron-sulfur cluster binding, metal ion binding, NAD or NADH binding, NADH dehydrogenase (ubiquinone) activity, NADH dehydrogenase activity, oxidoreductase activity, oxidoreductase activity, acting on NADH or NADPH | electron transport chain, oxidation reduction, transport                                                                                   |
| high density lipoprotein binding protein                                                 | Hdlbp     | NP_598569    | 142      | 13            | cytoplasm, high-density lipoprotein particle, nucleus                               | RNA binding                                                                                                                                                                                                                                                                            | cholesterol metabolic process, lipid metabolic process, lipid transport, steroid metabolic process, transport                              |
| PREDICTED: hypothetical protein                                                          | LOC674419 | XP_982574    | 30       | 13            | not classified                                                                      | not classified                                                                                                                                                                                                                                                                         | not classified                                                                                                                             |
| aldehyde dehydrogenase family 3, subfamily A2                                            | Aldh3a2   | NP_031463    | 54       | 12            | endoplasmic reticulum, integral to membrane, membrane, mitochondrial inner membrane | aldehyde dehydrogenase (NAD) activity, aldehyde dehydrogenase [NAD(P)-] activity, oxidoreductase activity                                                                                                                                                                              | cellular aldehyde metabolic process, metabolic process, oxidation reduction                                                                |
| carbonyl reductase 1                                                                     | Cbr1      | NP_031646    | 31       | 12            | cellular_component, cytoplasm                                                       | binding, carbonyl reductase (NADPH) activity, catalytic activity, oxidoreductase activity                                                                                                                                                                                              | biological_process, metabolic process, oxidation reduction                                                                                 |
| protein kinase C substrate 80K-H                                                         | Prkcsh    | NP_032951    | 59       | 12            | alpha-glucosidase II complex, endoplasmic reticulum                                 | alpha-glucosidase activity, calcium ion binding, kinase activity, protein binding, RNA binding                                                                                                                                                                                         | N-glycan processing                                                                                                                        |
| ribosomal protein L18                                                                    | Rpl18     | NP_033103    | 22       | 12            | cellular_component, cytoplasm, intracellular, ribonucleoprotein complex, ribosome   | molecular_function, structural constituent of ribosome                                                                                                                                                                                                                                 | biological_process, translation                                                                                                            |
| glutathione S-transferase, pi 1                                                          | Gstp1     | NP_038569    | 24       | 12            | not classified                                                                      | glutathione transferase activity, transferase activity                                                                                                                                                                                                                                 | glutathione metabolic process, metabolic process                                                                                           |
| S-adenosylhomocysteine hydrolase                                                         | Ahcy      | NP_057870    | 48       | 12            | cytoplasm, cytosol                                                                  | adenosylhomocysteinase activity, copper ion binding, hydrolase activity, protein self-association                                                                                                                                                                                      | one-carbon metabolic process, S-adenosylhomocysteine catabolic process                                                                     |
| ornithine aminotransferase                                                               | Oat       | NP_058674    | 48       | 12            | mitochondrion                                                                       | catalytic activity, ornithine-oxo-acid transaminase activity, pyridoxal phosphate binding, transaminase activity, transferase activity                                                                                                                                                 | not classified                                                                                                                             |

| Protein Name                                 | Gene Name | Accession No | Mw (kDa) | Peptide Count | GO Component                                                                                                                                                             | GO Function                                                                                                                                                                          | GO Process                                                                                                 |
|----------------------------------------------|-----------|--------------|----------|---------------|--------------------------------------------------------------------------------------------------------------------------------------------------------------------------|--------------------------------------------------------------------------------------------------------------------------------------------------------------------------------------|------------------------------------------------------------------------------------------------------------|
| RAB11a, member RAS oncogene family           | Rab11a    | NP_059078    | 24       | 12            | endosome, membrane, plasma membrane, trans-Golgi network                                                                                                                 | GTP binding, nucleotide binding                                                                                                                                                      | protein transport, small GTPase mediated signal transduction, transport                                    |
| myo-inositol 1-phosphate synthase A1         | Isyna1    | NP_076116    | 61       | 12            | cytoplasm                                                                                                                                                                | binding, catalytic activity, inositol-3-phosphate synthase activity, isomerase activity                                                                                              | inositol biosynthetic process, metabolic process, phospholipid biosynthetic process                        |
| heterogeneous nuclear ribonucleoprotein L    | Hnrnpl    | NP_796275    | 60       | 12            | nucleus, pronucleus, ribonucleoprotein complex                                                                                                                           | nucleic acid binding, nucleotide binding, RNA binding                                                                                                                                | mRNA processing                                                                                            |
| glutathione S-transferase, pi 2              | Gstp2     | NP_861461    | 24       | 12            | not classified                                                                                                                                                           | glutathione transferase activity, transferase activity                                                                                                                               | glutathione metabolic process, metabolic process                                                           |
| PREDICTED: similar to desmoplakin            | Dsp       | XP_001481322 | 333      | 12            | basolateral plasma membrane, desmosome, mitochondrion                                                                                                                    | not classified                                                                                                                                                                       | not classified                                                                                             |
| PREDICTED: hypothetical protein              | LOC640248 | XP_922185    | 22       | 12            | not classified                                                                                                                                                           | not classified                                                                                                                                                                       | not classified                                                                                             |
| aldo-keto reductase family 1, member C19     | Akr1c19   | NP_001013807 | 37       | 11            | cellular_component                                                                                                                                                       | molecular_function                                                                                                                                                                   | biological_process                                                                                         |
| nucleoside-diphosphate kinase 2              | Nme2      | NP_001070997 | 17       | 11            | cytoplasm, membrane, mitochondrion, plasma membrane                                                                                                                      | ATP binding, kinase activity, magnesium ion binding, metal ion binding, nucleoside diphosphate kinase activity, nucleotide binding, transferase activity                             | CTP biosynthetic process, GTP biosynthetic process, nucleotide metabolic process, UTP biosynthetic process |
| acidic ribosomal phosphoprotein P0           | Rplp0     | NP_031501    | 34       | 11            | intracellular, ribonucleoprotein complex, ribosome                                                                                                                       | structural constituent of ribosome                                                                                                                                                   | ribosome biogenesis, translational elongation                                                              |
| DEAH (Asp-Glu-Ala-His) box polypeptide 9     | Dhx9      | NP_031868    | 150      | 11            | intracellular, nucleolus, nucleus, ribonucleoprotein complex                                                                                                             | ATP binding, ATP-dependent helicase activity, DNA binding, double-stranded RNA binding, helicase activity, hydrolase activity, nucleic acid binding, nucleotide binding, RNA binding | cellular response to heat                                                                                  |
| peptidylprolyl isomerase A                   | Ppia      | NP_032933    | 18       | 11            | cytoplasm, cytosol                                                                                                                                                       | isomerase activity, peptide binding, peptidyl-prolyl cis-trans isomerase activity, protein binding                                                                                   | neuron differentiation, protein folding                                                                    |
| vinculin                                     | Vcl       | NP_033528    | 117      | 11            | actin cytoskeleton, adherens junction, cell junction, cell-cell junction, costamere, cytoplasm, cytoskeleton, fascia adherens, focal adhesion, membrane, plasma membrane | actin binding, protein binding, structural molecule activity                                                                                                                         | cell adhesion, lamellipodium assembly, regulation of cell migration                                        |
| tripeptidyl-peptidase I                      | Tpp1      | NP_034036    | 61       | 11            | lysosome, mitochondrion                                                                                                                                                  | hydrolase activity, peptidase activity, serine-type endopeptidase activity, serine-type peptidase activity                                                                           | lysosome organization, neuromuscular process controlling balance, proteolysis                              |
| heterochromatin protein 1, binding protein 3 | Hp1bp3    | NP_034600    | 61       | 11            | chromosome, nucleosome, nucleus                                                                                                                                          | DNA binding                                                                                                                                                                          | nucleosome assembly                                                                                        |
| lamin B2                                     | Lmnb2     | NP_034852    | 67       | 11            | intermediate filament, lamin filament, membrane, nucleus                                                                                                                 | structural molecule activity                                                                                                                                                         | not classified                                                                                             |

| Protein Name                                                                                 | Gene Name | Accession No | Mw (kDa) | Peptide Count | GO Component                                                                                | GO Function                                                                                                                                            | GO Process                                                                                                                                                                                                                                                                                                                                                                                                                                                                                                                                                                                                                                                                                                                                                                                                                                                                                                                          |
|----------------------------------------------------------------------------------------------|-----------|--------------|----------|---------------|---------------------------------------------------------------------------------------------|--------------------------------------------------------------------------------------------------------------------------------------------------------|-------------------------------------------------------------------------------------------------------------------------------------------------------------------------------------------------------------------------------------------------------------------------------------------------------------------------------------------------------------------------------------------------------------------------------------------------------------------------------------------------------------------------------------------------------------------------------------------------------------------------------------------------------------------------------------------------------------------------------------------------------------------------------------------------------------------------------------------------------------------------------------------------------------------------------------|
| superoxide dismutase 1, soluble                                                              | Sod1      | NP_035564    | 16       | 11            | cytoplasm, extracellular space, mitochondrion                                               | antioxidant activity, copper ion binding, metal ion binding, oxidoreductase activity, protein binding, superoxide dismutase activity, zinc ion binding | activation of MAPK activity, aging, auditory receptor cell stereocilium organization, cellular iron ion homeostasis, DNA fragmentation involved in apoptosis, double-strand break repair, embryo implantation, glutathione metabolic process, heart contraction, hydrogen peroxide biosynthetic process, locomotory behavior, muscle homeostasis, myelin maintenance in the peripheral nervous system, myeloid cell homeostasis, negative regulation of apoptosis, negative regulation of neuron apoptosis, neurofilament cytoskeleton organization, ovarian follicle development, oxidation reduction, regulation of blood pressure, regulation of multicellular organism growth, relaxation of vascular smooth muscle, removal of superoxide radicals, response to axon injury, response to drug, response to ethanol, response to heat, response to hydrogen peroxide, response to oxidative stress, response to reactive oxygen |
| transaldolase 1                                                                              | Taldo1    | NP_035658    | 37       | 11            | cytoplasm                                                                                   | catalytic activity, transaldolase activity, transferase activity                                                                                       | carbohydrate metabolic process, metabolic process, pentose-phosphate shunt                                                                                                                                                                                                                                                                                                                                                                                                                                                                                                                                                                                                                                                                                                                                                                                                                                                          |
| ubiquitin-activating enzyme E1, Chr Y 1                                                      | Ube1y1    | NP_035797    | 118      | 11            | not classified                                                                              | ATP binding, binding, catalytic activity, ligase activity, nucleotide binding, small protein activating enzyme activity                                | metabolic process, modification-dependent protein catabolic process, protein modification process                                                                                                                                                                                                                                                                                                                                                                                                                                                                                                                                                                                                                                                                                                                                                                                                                                   |
| tyrosine 3-monooxygenase/tryptophan 5-monooxygenase activation protein, theta polypeptide    | Ywhaq     | NP_035869    | 28       | 11            | cellular_component, cytoplasm                                                               | monooxygenase activity, protein domain specific binding                                                                                                | protein targeting, signal transduction, small GTPase mediated signal transduction                                                                                                                                                                                                                                                                                                                                                                                                                                                                                                                                                                                                                                                                                                                                                                                                                                                   |
| coatamer protein complex, subunit beta 2 (beta prime)                                        | Copb2     | NP_056642    | 102      | 11            | COPI vesicle coat, cytoplasm, cytoplasmic vesicle, Golgi apparatus, membrane, membrane coat | protein binding, structural molecule activity                                                                                                          | intracellular protein transport, protein transport, vesicle-mediated transport                                                                                                                                                                                                                                                                                                                                                                                                                                                                                                                                                                                                                                                                                                                                                                                                                                                      |
| solute carrier family 25 (mitochondrial carrier, adenine nucleotide translocator), member 13 | Slc25a13  | NP_056644    | 74       | 11            | integral to membrane, membrane, mitochondrial inner membrane, mitochondrion                 | binding, calcium ion binding, L-glutamate transmembrane transporter activity                                                                           | aspartate transport, malate-aspartate shuttle, transport                                                                                                                                                                                                                                                                                                                                                                                                                                                                                                                                                                                                                                                                                                                                                                                                                                                                            |
| heterogeneous nuclear ribonucleoprotein C                                                    | Hnrnpc    | NP_058580    | 34       | 11            | nucleus, pronucleus, ribonucleoprotein complex, spliceosomal complex                        | mRNA binding, nucleic acid binding, nucleotide binding, RNA binding                                                                                    | mRNA processing, RNA splicing                                                                                                                                                                                                                                                                                                                                                                                                                                                                                                                                                                                                                                                                                                                                                                                                                                                                                                       |
| hemoglobin, beta adult minor chain                                                           | Hbb-b2    | NP_058652    | 16       | 11            | hemoglobin complex                                                                          | heme binding, iron ion binding, metal ion binding, oxygen binding, oxygen transporter activity                                                         | oxygen transport, transport                                                                                                                                                                                                                                                                                                                                                                                                                                                                                                                                                                                                                                                                                                                                                                                                                                                                                                         |
| acyl-CoA thioesterase 9                                                                      | Acot9     | NP_062710    | 51       | 11            | mitochondrion                                                                               | acyl-CoA thioesterase activity, carboxylesterase activity, hydrolase activity, palmitoyl-CoA hydrolase activity                                        | not classified                                                                                                                                                                                                                                                                                                                                                                                                                                                                                                                                                                                                                                                                                                                                                                                                                                                                                                                      |

| Protein Name                                                                                | Gene Name         | Accession No | Mw (kDa) | Peptide Count | GO Component                                                                                                | GO Function                                                                                                                                                | GO Process                                                                                                                                                                                                                                                                                                                             |
|---------------------------------------------------------------------------------------------|-------------------|--------------|----------|---------------|-------------------------------------------------------------------------------------------------------------|------------------------------------------------------------------------------------------------------------------------------------------------------------|----------------------------------------------------------------------------------------------------------------------------------------------------------------------------------------------------------------------------------------------------------------------------------------------------------------------------------------|
| D-lactate dehydrogenase                                                                     | Ldhd              | NP_081846    | 52       | 11            | mitochondrion                                                                                               | catalytic activity, D-lactate dehydrogenase (cytochrome) activity, D-lactate dehydrogenase activity, FAD binding, oxidoreductase activity, protein binding | ATP biosynthetic process, oxidation reduction                                                                                                                                                                                                                                                                                          |
| leucine-rich PPR motif-containing protein                                                   | Lrpprc            | NP_082509    | 157      | 11            | cytoplasm, membrane, mitochondrion, nucleus                                                                 | DNA binding, protein binding, RNA binding, single-stranded DNA binding                                                                                     | mRNA transport, regulation of transcription, transcription, transport                                                                                                                                                                                                                                                                  |
| FGF receptor activating protein 1                                                           | Frag1             | NP_663558    | 29       | 11            | endoplasmic reticulum, Golgi apparatus, integral to membrane, membrane, nucleus                             | protein binding                                                                                                                                            | anti-apoptosis, DNA damage response, signal transduction, GPI anchor biosynthetic process, response to DNA damage stimulus                                                                                                                                                                                                             |
| dihydrolipoamide S-acetyltransferase (E2 component of pyruvate dehydrogenase complex)       | Dlat              | NP_663589    | 68       | 11            | mitochondrial pyruvate dehydrogenase complex, mitochondrion, pyruvate dehydrogenase complex                 | acyltransferase activity, dihydrolipoalysine-residue acetyltransferase activity, lipoic acid binding, protein binding, transferase activity                | acetyl-CoA biosynthetic process from pyruvate, glycolysis, metabolic process, pyruvate metabolic process                                                                                                                                                                                                                               |
| adaptor-related protein complex 2, beta 1 subunit isoform a                                 | Ap2b1             | NP_001030931 | 106      | 10            | clathrin adaptor complex, coated pit, membrane, membrane coat, plasma membrane                              | binding, clathrin binding, protein binding, protein transporter activity                                                                                   | intracellular protein transport, protein transport, vesicle-mediated transport                                                                                                                                                                                                                                                         |
| predicted gene, OTTMUSG00000007855                                                          | OTTMUSG0000007855 | NP_001074488 | 15       | 10            | not classified                                                                                              | not classified                                                                                                                                             | not classified                                                                                                                                                                                                                                                                                                                         |
| solute carrier family 25 (mitochondrial carrier, adenine nucleotide translocator), member 4 | Slc25a4           | NP_031476    | 33       | 10            | integral to membrane, membrane, mitochondrial inner membrane, mitochondrial outer membrane, mitochondrion   | binding, transporter activity                                                                                                                              | transport                                                                                                                                                                                                                                                                                                                              |
| ADP-ribosylation factor 5                                                                   | Arf5              | NP_031506    | 21       | 10            | cytoplasm, Golgi apparatus, intracellular, plasma membrane                                                  | GTP binding, nucleotide binding                                                                                                                            | protein transport, small GTPase mediated signal transduction, transport, vesicle-mediated transport                                                                                                                                                                                                                                    |
| cofilin 1, non-muscle                                                                       | Cfl1              | NP_031713    | 19       | 10            | cortical actin cytoskeleton, cytoplasm, cytoskeleton, cytosol, extracellular region, intracellular, nucleus | actin binding                                                                                                                                              | actin filament organization, cell motion, cell projection organization, cytokinesis, establishment of cell polarity, negative regulation of cell size, neural crest cell migration, neural fold formation, positive regulation of actin filament depolymerization, protein amino acid phosphorylation, response to amino acid stimulus |
| cytochrome c oxidase, subunit Va                                                            | Cox5a             | NP_031773    | 16       | 10            | membrane, mitochondrial inner membrane, mitochondrion                                                       | cytochrome-c oxidase activity, iron ion binding, metal ion binding                                                                                         | not classified                                                                                                                                                                                                                                                                                                                         |
| dihydrolipoamide dehydrogenase                                                              | Dld               | NP_031887    | 54       | 10            | acrosomal matrix, cytoplasm, flagellum, mitochondrion                                                       | dihydrolipoaldehyde dehydrogenase activity, FAD binding, oxidoreductase activity                                                                           | cell redox homeostasis, gastrulation, mitochondrial electron transport, NADH to ubiquinone, oxidation reduction, proteolysis, regulation of membrane potential, sperm capacitation                                                                                                                                                     |

| Protein Name                                                                                | Gene Name | Accession No | Mw (kDa) | Peptide Count | GO Component                                                             | GO Function                                                                                                                                                     | GO Process                                                                                                                                                                                                                           |
|---------------------------------------------------------------------------------------------|-----------|--------------|----------|---------------|--------------------------------------------------------------------------|-----------------------------------------------------------------------------------------------------------------------------------------------------------------|--------------------------------------------------------------------------------------------------------------------------------------------------------------------------------------------------------------------------------------|
| eukaryotic translation elongation factor 2                                                  | Eef2      | NP_031933    | 95       | 10            | cytoplasm, ribonucleoprotein complex                                     | GTP binding, GTPase activity, nucleotide binding, translation elongation factor activity                                                                        | translation                                                                                                                                                                                                                          |
| glutamate dehydrogenase 1                                                                   | Glud1     | NP_032159    | 61       | 10            | mitochondrial inner membrane, mitochondrion                              | ATP binding, binding, catalytic activity, glutamate dehydrogenase [NAD(P)+] activity, GTP binding, nucleotide binding, oxidoreductase activity, protein binding | cellular amino acid metabolic process, metabolic process, oxidation reduction, positive regulation of insulin secretion                                                                                                              |
| indolethylamine N-methyltransferase                                                         | Inmt      | NP_033375    | 29       | 10            | cytoplasm                                                                | amine N-methyltransferase activity, methyltransferase activity, transferase activity                                                                            | not classified                                                                                                                                                                                                                       |
| tyrosine 3-monooxygenase/tryptophan 5-monooxygenase activation protein, epsilon polypeptide | Ywhae     | NP_033562    | 29       | 10            | cytoplasm, mitochondrion                                                 | monooxygenase activity, protein binding, protein domain specific binding                                                                                        | cerebral cortex development, hippocampus development, negative regulation of protein amino acid dephosphorylation, neuron migration, protein targeting                                                                               |
| filamin, alpha                                                                              | Flna      | NP_034357    | 281      | 10            | cytoplasm, cytoskeleton, trans-Golgi network                             | actin binding, protein binding, protein kinase C binding                                                                                                        | early endosome to late endosome transport                                                                                                                                                                                            |
| histone deacetylase 6                                                                       | Hdac6     | NP_034543    | 126      | 10            | cytoplasm, nucleus                                                       | actin binding, histone deacetylase activity, hydrolase activity, metal ion binding, protein binding, zinc ion binding                                           | chromatin modification, negative regulation of microtubule depolymerization, protein amino acid deacetylation, protein polyubiquitination, regulation of transcription, transcription, ubiquitin-dependent protein catabolic process |
| poly(rC) binding protein 2 isoform 2                                                        | Pcbp2     | NP_035172    | 37       | 10            | nucleus, ribonucleoprotein complex                                       | DNA binding, RNA binding                                                                                                                                        | not classified                                                                                                                                                                                                                       |
| tyrosine 3-monooxygenase/tryptophan 5-monooxygenase activation protein, zeta polypeptide    | Ywhaz     | NP_035870    | 28       | 10            | cytoplasm, mitochondrion, nucleus                                        | protein domain specific binding                                                                                                                                 | protein targeting                                                                                                                                                                                                                    |
| aldehyde dehydrogenase family 1, subfamily A7                                               | Aldh1a7   | NP_036051    | 55       | 10            | cellular_component, cytoplasm                                            | aldehyde dehydrogenase (NAD) activity, oxidoreductase activity                                                                                                  | metabolic process, oxidation reduction, retinal metabolic process, retinoic acid metabolic process                                                                                                                                   |
| hexokinase 2                                                                                | Hk2       | NP_038848    | 103      | 10            | not classified                                                           | ATP binding, hexokinase activity, kinase activity, nucleotide binding, phosphotransferase activity, alcohol group as acceptor, transferase activity             | carbohydrate metabolic process, carbohydrate phosphorylation, glucose metabolic process, glycolysis                                                                                                                                  |
| acyl-CoA thioesterase 10                                                                    | Acot10    | NP_073727    | 51       | 10            | mitochondrion                                                            | acyl-CoA thioesterase activity, carboxylesterase activity, hydrolase activity                                                                                   | acyl-CoA metabolic process                                                                                                                                                                                                           |
| abhydrolase domain containing 12                                                            | Abhd12    | NP_077785    | 45       | 10            | integral to membrane, membrane                                           | acylglycerol lipase activity, hydrolase activity                                                                                                                | not classified                                                                                                                                                                                                                       |
| ubiquinol-cytochrome c reductase core protein 1                                             | Uqcrc1    | NP_079683    | 53       | 10            | membrane, mitochondrial inner membrane, mitochondrion, respiratory chain | catalytic activity, metal ion binding, metalloendopeptidase activity, zinc ion binding                                                                          | electron transport chain, mitochondrial electron transport, ubiquinol to cytochrome c, proteolysis, transport                                                                                                                        |

| Protein Name                                                     | Gene Name | Accession No | Mw (kDa) | Peptide Count | GO Component                                                | GO Function                                                                                                                                                                                                                                     | GO Process                                                                                                                                                            |
|------------------------------------------------------------------|-----------|--------------|----------|---------------|-------------------------------------------------------------|-------------------------------------------------------------------------------------------------------------------------------------------------------------------------------------------------------------------------------------------------|-----------------------------------------------------------------------------------------------------------------------------------------------------------------------|
| myosin, heavy polypeptide 14                                     | Myh14     | NP_082297    | 228      | 10            | axon, cytoplasm, growth cone, myosin complex, stress fiber  | actin binding, actin filament binding, actin-dependent ATPase activity, ATP binding, calmodulin binding, microfilament motor activity, motor activity, nucleotide binding                                                                       | actin filament-based movement, regulation of cell shape                                                                                                               |
| serine hydroxymethyltransferase 2 (mitochondrial)                | Shmt2     | NP_082506    | 56       | 10            | mitochondrial inner membrane, mitochondrion                 | glycine hydroxymethyltransferase activity, methyltransferase activity, transferase activity                                                                                                                                                     | one-carbon metabolic process                                                                                                                                          |
| glutamyl-prolyl-tRNA synthetase                                  | Eprs      | NP_084011    | 170      | 10            | cytoplasm                                                   | aminoacyl-tRNA ligase activity, ATP binding, catalytic activity, glutamate-tRNA ligase activity, ligase activity, nucleotide binding, proline tRNA ligase activity, RNA binding                                                                 | glutamyl-tRNA aminoacylation, prolyl-tRNA aminoacylation, translation, tRNA aminoacylation for protein translation                                                    |
| splicing factor 3b, subunit 1                                    | Sf3b1     | NP_112456    | 146      | 10            | nucleus, spliceosomal complex                               | binding, chromatin binding, protein binding, RNA splicing factor activity, transesterification mechanism                                                                                                                                        | anterior/posterior pattern formation, mRNA processing, nuclear mRNA splicing, via spliceosome, RNA splicing                                                           |
| enoyl Coenzyme A hydratase, short chain, 1, mitochondrial        | Echs1     | NP_444349    | 31       | 10            | mitochondrion                                               | catalytic activity, enoyl-CoA hydratase activity, lyase activity                                                                                                                                                                                | fatty acid metabolic process, lipid metabolic process, metabolic process                                                                                              |
| plastin 3 precursor                                              | Pls3      | NP_663604    | 71       | 10            | cytoplasm                                                   | actin binding, calcium ion binding, molecular_function                                                                                                                                                                                          | biological_process                                                                                                                                                    |
| isocitrate dehydrogenase 2 (NADP+), mitochondrial                | Idh2      | NP_766599    | 51       | 10            | mitochondrial inner membrane, mitochondrion                 | isocitrate dehydrogenase (NADP+) activity, magnesium ion binding, manganese ion binding, metal ion binding, NAD or NADH binding, oxidoreductase activity, oxidoreductase activity, acting on the CH-OH group of donors, NAD or NADP as acceptor | glyoxylate cycle, isocitrate metabolic process, oxidation reduction, response to stress, tricarboxylic acid cycle                                                     |
| PREDICTED: similar to Eukaryotic translation elongation factor 2 | LOC433776 | XP_001475612 | 46       | 10            | not classified                                              | not classified                                                                                                                                                                                                                                  | not classified                                                                                                                                                        |
| PREDICTED: similar to mKIAA0829 protein isoform 4                | Cand1     | XP_909201    | 159      | 10            | nucleus                                                     | binding                                                                                                                                                                                                                                         | modification-dependent protein catabolic process, regulation of transcription, transcription                                                                          |
| heterogeneous nuclear ribonucleoprotein M isoform b              | Hnrnmp    | NP_001103383 | 74       | 9             | nucleus, ribonucleoprotein complex, spliceosomal complex    | nucleic acid binding, nucleotide binding, RNA binding                                                                                                                                                                                           | mRNA processing, RNA splicing                                                                                                                                         |
| CD151 antigen                                                    | Cd151     | NP_001104520 | 28       | 9             | integral to membrane, membrane                              | not classified                                                                                                                                                                                                                                  | not classified                                                                                                                                                        |
| cysteine-rich protein 1 (intestinal)                             | Crip1     | NP_031789    | 9        | 9             | not classified                                              | metal ion binding, zinc ion binding                                                                                                                                                                                                             | not classified                                                                                                                                                        |
| cytochrome c, somatic                                            | Cycc      | NP_031834    | 12       | 9             | cytosol, mitochondrion, respiratory chain, soluble fraction | electron carrier activity, heme binding, iron ion binding, metal ion binding                                                                                                                                                                    | activation of caspase activity by cytochrome c, apoptosis, electron transport chain, hydrogen peroxide metabolic process, positive regulation of apoptosis, transport |

| Protein Name                               | Gene Name | Accession No | Mw (kDa) | Peptide Count | GO Component                                                                                                                                                                                      | GO Function                                                                                                                            | GO Process                                                                                                                                                                                                                                                                                                                                                                                                                                                                                                                                                         |
|--------------------------------------------|-----------|--------------|----------|---------------|---------------------------------------------------------------------------------------------------------------------------------------------------------------------------------------------------|----------------------------------------------------------------------------------------------------------------------------------------|--------------------------------------------------------------------------------------------------------------------------------------------------------------------------------------------------------------------------------------------------------------------------------------------------------------------------------------------------------------------------------------------------------------------------------------------------------------------------------------------------------------------------------------------------------------------|
| glucose-6-phosphate dehydrogenase X-linked | G6pdx     | NP_032088    | 59       | 9             | not classified                                                                                                                                                                                    | binding, catalytic activity, glucose-6-phosphate dehydrogenase activity, oxidoreductase activity, protein homodimerization activity    | angiotensin mediated vasoconstriction involved in regulation of systemic arterial blood pressure, carbohydrate metabolic process, cytokine production, erythrocyte development, glucose metabolic process, glutathione metabolic process, interleukin-10 production, interleukin-12 production, metabolic process, NADP biosynthetic process, oxidation reduction, pentose biosynthetic process, regulation of multicellular organism growth, response to oxidative stress, vasodilation by angiotensin involved in regulation of systemic arterial blood pressure |
| heat shock protein 4                       | Hspa4     | NP_032326    | 94       | 9             | cytoplasm                                                                                                                                                                                         | ATP binding, nucleotide binding                                                                                                        | response to stress                                                                                                                                                                                                                                                                                                                                                                                                                                                                                                                                                 |
| membrane metallo endopeptidase             | Mme       | NP_032630    | 86       | 9             | integral to membrane, membrane, plasma membrane                                                                                                                                                   | hydrolase activity, metal ion binding, metalloendopeptidase activity, metalloproteinase activity, peptidase activity, zinc ion binding | proteolysis                                                                                                                                                                                                                                                                                                                                                                                                                                                                                                                                                        |
| palmitoyl-protein thioesterase 1           | Ppt1      | NP_032943    | 34       | 9             | axon, cell soma, dendrite, extracellular space, lysosome                                                                                                                                          | hydrolase activity, palmitoyl-(protein) hydrolase activity                                                                             | adult locomotory behavior, associative learning, cellular macromolecule catabolic process, cellular protein catabolic process, grooming behavior, lysosome organization, neurotransmitter secretion, pinocytosis, protein depalmitoylation, protein modification process, receptor-mediated endocytosis, regulation of phospholipase A2 activity, visual perception                                                                                                                                                                                                |
| prominin 1                                 | Prom1     | NP_032961    | 96       | 9             | apical plasma membrane, brush border, cell projection, cell surface, extracellular space, integral to membrane, integral to plasma membrane, membrane, microvillus, plasma membrane, stereocilium | molecular_function                                                                                                                     | biological_process                                                                                                                                                                                                                                                                                                                                                                                                                                                                                                                                                 |
| RAB7, member RAS oncogene family           | Rab7      | NP_033031    | 23       | 9             | cytoplasmic vesicle, endosome, Golgi apparatus, late endosome, lysosome                                                                                                                           | GTP binding, nucleotide binding                                                                                                        | intracellular protein transport, protein transport, small GTPase mediated signal transduction, transport                                                                                                                                                                                                                                                                                                                                                                                                                                                           |



| Protein Name                                                                             | Gene Name | Accession No | Mw (kDa) | Peptide Count | GO Component                                                                                                                                            | GO Function                                                                                                                                                                            | GO Process                                                                                                                                         |
|------------------------------------------------------------------------------------------|-----------|--------------|----------|---------------|---------------------------------------------------------------------------------------------------------------------------------------------------------|----------------------------------------------------------------------------------------------------------------------------------------------------------------------------------------|----------------------------------------------------------------------------------------------------------------------------------------------------|
| acetyl-Coenzyme A acetyltransferase 2                                                    | Acat2     | NP_033364    | 41       | 9             | cytoplasm                                                                                                                                               | acetyl-CoA C-acetyltransferase activity, acyltransferase activity, catalytic activity, transferase activity, transferring acyl groups other than amino-acyl groups                     | metabolic process                                                                                                                                  |
| heterogeneous nuclear ribonucleoprotein A/B isoform 2                                    | Hnrnpab   | NP_034578    | 31       | 9             | cytoplasm, nucleus, ribonucleoprotein complex                                                                                                           | DNA binding, nucleic acid binding, nucleotide binding, protein binding, RNA binding, sequence-specific DNA binding, transcription factor activity                                      | epithelial to mesenchymal transition, positive regulation of gene-specific transcription, regulation of transcription, transcription               |
| succinate-Coenzyme A ligase, ADP-forming, beta subunit                                   | Suca2     | NP_035636    | 50       | 9             | mitochondrion                                                                                                                                           | ATP binding, catalytic activity, ligase activity, nucleotide binding, succinate-CoA ligase (ADP-forming) activity, succinate-CoA ligase activity                                       | metabolic process, tricarboxylic acid cycle                                                                                                        |
| apoptosis-inducing factor, mitochondrion-associated 1                                    | Aifm1     | NP_036149    | 67       | 9             | cytoplasm, cytosol, microsome, mitochondrial intermembrane space, mitochondrial outer membrane, mitochondrion, nucleus, soluble fraction                | DNA binding, electron-transferring-flavoprotein dehydrogenase activity, FAD binding, oxidoreductase activity                                                                           | apoptosis, apoptotic mitochondrial changes, cell redox homeostasis, DNA fragmentation involved in apoptosis, neuron apoptosis, oxidation reduction |
| aldo-keto reductase family 1, member C13                                                 | Akr1c13   | NP_038806    | 37       | 9             | not classified                                                                                                                                          | aldo-keto reductase activity, oxidoreductase activity                                                                                                                                  | oxidation reduction, xenobiotic metabolic process                                                                                                  |
| tyrosine 3-monooxygenase/tryptophan 5-monooxygenase activation protein, beta polypeptide | Ywhab     | NP_061223    | 28       | 9             | cellular_component, cytoplasm                                                                                                                           | monooxygenase activity, protein binding, protein domain specific binding                                                                                                               | protein targeting                                                                                                                                  |
| carboxylesterase 1                                                                       | Ces1      | NP_067431    | 63       | 9             | endoplasmic reticulum                                                                                                                                   | carboxylesterase activity, hydrolase activity                                                                                                                                          | not classified                                                                                                                                     |
| CNDP dipeptidase 2                                                                       | Cndp2     | NP_075638    | 53       | 9             | cytosol                                                                                                                                                 | carboxypeptidase activity, dipeptidase activity, hydrolase activity, metal ion binding, metallopeptidase activity, peptidase activity, protein dimerization activity, zinc ion binding | proteolysis                                                                                                                                        |
| chromosome segregation 1-like                                                            | Cse1l     | NP_076054    | 110      | 9             | cytoplasm, nucleus                                                                                                                                      | binding, importin-alpha export receptor activity, protein transporter activity                                                                                                         | cell proliferation, intracellular protein transport, protein transport, transport                                                                  |
| ribosomal protein L4                                                                     | Rpl4      | NP_077174    | 47       | 9             | intracellular, ribonucleoprotein complex, ribosome                                                                                                      | protein binding, structural constituent of ribosome                                                                                                                                    | biological_process, translation                                                                                                                    |
| cytochrome b-5                                                                           | Cyb5      | NP_080073    | 15       | 9             | endoplasmic reticulum, integral to membrane, membrane, microsome, mitochondrion                                                                         | heme binding, iron ion binding, metal ion binding, stearyl-CoA 9-desaturase activity                                                                                                   | electron transport chain, fatty acid metabolic process, transport                                                                                  |
| eukaryotic translation elongation factor 1 gamma                                         | Eef1g     | NP_080283    | 50       | 9             | eukaryotic translation elongation factor 1 complex                                                                                                      | translation elongation factor activity                                                                                                                                                 | translation, translational elongation                                                                                                              |
| acyl-CoA synthetase long-chain family member 5                                           | Acsf5     | NP_082252    | 76       | 9             | endoplasmic reticulum, integral to membrane, membrane, microsome, mitochondrial inner membrane, mitochondrial outer membrane, mitochondrion, peroxisome | ATP binding, catalytic activity, ligase activity, long-chain-fatty-acid-CoA ligase activity, magnesium ion binding, molecular_function, nucleotide binding                             | biological_process, fatty acid metabolic process, lipid metabolic process, metabolic process                                                       |
| phosphoglucosyltransferase 2                                                             | Pgm2      | NP_082408    | 62       | 9             | not classified                                                                                                                                          | magnesium ion binding, metal ion binding, phosphoglucosyltransferase activity                                                                                                          | glucose metabolic process                                                                                                                          |

| Protein Name                                                                         | Gene Name    | Accession No | Mw (kDa) | Peptide Count | GO Component                                                                                                          | GO Function                                                                                                                                                                                | GO Process                                                                                                                                                                                                                                                               |
|--------------------------------------------------------------------------------------|--------------|--------------|----------|---------------|-----------------------------------------------------------------------------------------------------------------------|--------------------------------------------------------------------------------------------------------------------------------------------------------------------------------------------|--------------------------------------------------------------------------------------------------------------------------------------------------------------------------------------------------------------------------------------------------------------------------|
| glutathione S-transferase kappa 1                                                    | Gstk1        | NP_083831    | 26       | 9             | mitochondrial inner membrane, mitochondrion, outer membrane-bounded periplasmic space                                 | glutathione peroxidase activity, glutathione transferase activity, protein disulfide oxidoreductase activity, transferase activity                                                         | glutathione metabolic process                                                                                                                                                                                                                                            |
| N-acetylneuraminic acid synthase                                                     | Nans         | NP_444409    | 40       | 9             | cytosol                                                                                                               | N-acetylneuraminic acid phosphate synthase activity                                                                                                                                        | biological_process                                                                                                                                                                                                                                                       |
| nuclear mitotic apparatus protein 1                                                  | Numa1        | NP_598708    | 236      | 9             | nucleus                                                                                                               | tubulin binding                                                                                                                                                                            | not classified                                                                                                                                                                                                                                                           |
| ATPase, H+ transporting, lysosomal V1 subunit B1                                     | Atp6v1b1     | NP_598918    | 57       | 9             | apical plasma membrane, basolateral plasma membrane, membrane fraction                                                | hydrogen ion transmembrane transporter activity                                                                                                                                            | ion transport, proton transport, regulation of pH, sensory perception of sound, transport                                                                                                                                                                                |
| pyrroline-5-carboxylate reductase 1                                                  | Pycr1        | NP_659044    | 32       | 9             | mitochondrion                                                                                                         | binding, catalytic activity, oxidoreductase activity, pyrroline-5-carboxylate reductase activity                                                                                           | cellular amino acid biosynthetic process, metabolic process, oxidation reduction, proline biosynthetic process                                                                                                                                                           |
| epiplakin 1                                                                          | Eppk1        | NP_659097    | 725      | 9             | cytoplasm, cytoskeleton                                                                                               | not classified                                                                                                                                                                             | not classified                                                                                                                                                                                                                                                           |
| electron transferring flavoprotein, alpha polypeptide                                | Etfa         | NP_663590    | 35       | 9             | mitochondrial electron transfer flavoprotein complex, mitochondrion                                                   | electron carrier activity, FAD binding                                                                                                                                                     | electron transport chain, transport                                                                                                                                                                                                                                      |
| galactosidase, beta 1-like 2                                                         | Glb12        | NP_722498    | 74       | 9             | extracellular region                                                                                                  | catalytic activity, cation binding, hydrolase activity, hydrolase activity, acting on glycosyl bonds, hydrolase activity, hydrolyzing O-glycosyl compounds                                 | carbohydrate metabolic process, metabolic process                                                                                                                                                                                                                        |
| PREDICTED: similar to S-adenosylhomocysteine hydrolase                               | LOC677344    | XP_001002625 | 23       | 9             | not classified                                                                                                        | not classified                                                                                                                                                                             | not classified                                                                                                                                                                                                                                                           |
| PREDICTED: similar to Electron transferring flavoprotein, beta polypeptide isoform 2 | LOC100045699 | XP_001474234 | 28       | 9             | not classified                                                                                                        | not classified                                                                                                                                                                             | not classified                                                                                                                                                                                                                                                           |
| PREDICTED: similar to ribosomal protein L3 isoform 3                                 | LOC100045885 | XP_001474762 | 40       | 9             | not classified                                                                                                        | not classified                                                                                                                                                                             | not classified                                                                                                                                                                                                                                                           |
| PREDICTED: similar to heterogeneous nuclear ribonucleoprotein U-like 2               | LOC100046594 | XP_001477737 | 85       | 9             | nucleus                                                                                                               | nucleic acid binding, protein binding                                                                                                                                                      | not classified                                                                                                                                                                                                                                                           |
| PREDICTED: golgi autoantigen, golgin subfamily b, macrogolgin 1                      | Golgb1       | XP_001481110 | 369      | 9             | Golgi apparatus                                                                                                       | not classified                                                                                                                                                                             | not classified                                                                                                                                                                                                                                                           |
| alcohol dehydrogenase 5 (class III), chi polypeptide                                 | Adh5         | NP_031436    | 40       | 8             | cytoplasm, mitochondrion                                                                                              | alcohol dehydrogenase (NAD) activity, metal ion binding, oxidoreductase activity, protein homodimerization activity, S-(hydroxymethyl)glutathione dehydrogenase activity, zinc ion binding | ethanol oxidation, formaldehyde catabolic process, oxidation reduction, peptidyl-cysteine S-nitrosylation, positive regulation of blood pressure, respiratory system process, response to lipopolysaccharide, response to nitrosative stress, retinoid metabolic process |
| ADP-ribosylation factor 3                                                            | Arf3         | NP_031504    | 21       | 8             | Golgi apparatus, intracellular                                                                                        | GTP binding, nucleotide binding                                                                                                                                                            | protein transport, small GTPase mediated signal transduction, transport, vesicle-mediated transport                                                                                                                                                                      |
| guanine nucleotide binding protein (G protein), beta polypeptide 2 like 1            | Gnb211       | NP_032169    | 35       | 8             | cell soma, cytoplasm, membrane, plasma membrane                                                                       | protein kinase C binding, receptor activity                                                                                                                                                | intracellular signaling cascade, protein localization                                                                                                                                                                                                                    |
| kinesin family member 5B                                                             | Kif5b        | NP_032474    | 110      | 8             | ciliary rootlet, cytoplasm, cytoskeleton, kinesin complex, membrane-bounded organelle, microtubule, neuron projection | ATP binding, microtubule motor activity, motor activity, nucleotide binding, protein binding                                                                                               | cytoplasm organization, microtubule-based movement, microtubule-based process, mitochondrial transport                                                                                                                                                                   |
| cytochrome P450 reductase                                                            | Por          | NP_032924    | 77       | 8             | endoplasmic reticulum, membrane, microsomes, soluble fraction                                                         | electron carrier activity, FMN binding, iron ion binding, NADPH-hemoprotein reductase activity, oxidoreductase activity                                                                    | oxidation reduction                                                                                                                                                                                                                                                      |

| Protein Name                                             | Gene Name | Accession No | Mw (kDa) | Peptide Count | GO Component                                                                        | GO Function                                                                                                                                                                       | GO Process                                                                                                                                                                                                                                                                                         |
|----------------------------------------------------------|-----------|--------------|----------|---------------|-------------------------------------------------------------------------------------|-----------------------------------------------------------------------------------------------------------------------------------------------------------------------------------|----------------------------------------------------------------------------------------------------------------------------------------------------------------------------------------------------------------------------------------------------------------------------------------------------|
| ribosomal protein L13a                                   | Rpl13a    | NP_033464    | 23       | 8             | intracellular, large ribosomal subunit, ribonucleoprotein complex, ribosome         | molecular_function, structural constituent of ribosome                                                                                                                            | biological_process, translation                                                                                                                                                                                                                                                                    |
| cytochrome c oxidase subunit IV isoform 1                | Cox4i1    | NP_034071    | 20       | 8             | membrane, mitochondrial inner membrane, mitochondrion                               | cytochrome-c oxidase activity, protein binding                                                                                                                                    | not classified                                                                                                                                                                                                                                                                                     |
| cytochrome c oxidase, subunit Vb                         | Cox5b     | NP_034072    | 14       | 8             | membrane, mitochondrial envelope, mitochondrial inner membrane, mitochondrion       | cytochrome-c oxidase activity, metal ion binding, zinc ion binding                                                                                                                | not classified                                                                                                                                                                                                                                                                                     |
| DEAD/H (Asp-Glu-Ala-Asp/His) box polypeptide 3, X-linked | Ddx3x     | NP_034158    | 73       | 8             | cytoplasm, nucleus                                                                  | ATP binding, ATP-dependent helicase activity, DNA binding, helicase activity, hydrolase activity, nucleic acid binding, nucleotide binding, RNA binding                           | not classified                                                                                                                                                                                                                                                                                     |
| annexin A1                                               | Anxa1     | NP_034860    | 39       | 8             | cell projection, cilium, cytoplasm, membrane, nucleus, plasma membrane, sarcolemma  | calcium ion binding, calcium-dependent phospholipid binding, phospholipase A2 inhibitor activity, phospholipase inhibitor activity, protein binding                               | arachidonic acid secretion, cell cycle, regulation of cell proliferation, signal transduction                                                                                                                                                                                                      |
| NAD(P) dependent steroid dehydrogenase-like              | Nsdhl     | NP_035071    | 41       | 8             | integral to membrane, membrane                                                      | 3-beta-hydroxy-delta5-steroid dehydrogenase activity, binding, catalytic activity, oxidoreductase activity, sterol-4-alpha-carboxylate 3-dehydrogenase (decarboxylating) activity | cholesterol biosynthetic process, cholesterol metabolic process, hair follicle development, labyrinthine layer blood vessel development, lipid biosynthetic process, metabolic process, oxidation reduction, smoothed signaling pathway, steroid biosynthetic process, sterol biosynthetic process |
| profilin 1                                               | Pfn1      | NP_035202    | 15       | 8             | actin cytoskeleton, cytoplasm, cytoskeleton, cytosol, extracellular region, nucleus | actin binding, protein binding, Rho GTPase binding                                                                                                                                | actin cytoskeleton organization, cytoskeleton organization, neural tube closure, regulation of actin polymerization or depolymerization, regulation of transcription from RNA polymerase II promoter, sequestering of actin monomers                                                               |
| succinate-Coenzyme A ligase, GDP-forming, beta subunit   | Suclg2    | NP_035637    | 47       | 8             | mitochondrion                                                                       | ATP binding, catalytic activity, GTP binding, ligase activity, nucleotide binding, succinate-CoA ligase (GDP-forming) activity, succinate-semialdehyde dehydrogenase activity     | metabolic process, tricarboxylic acid cycle                                                                                                                                                                                                                                                        |

| Protein Name                                                 | Gene Name | Accession No | Mw (kDa) | Peptide Count | GO Component                                                                                                 | GO Function                                                                                                                                                                                                          | GO Process                                                                                                                                                                                                                                                                                                                                                                                                                                                                                                                                                                                                                                                                                                                                  |
|--------------------------------------------------------------|-----------|--------------|----------|---------------|--------------------------------------------------------------------------------------------------------------|----------------------------------------------------------------------------------------------------------------------------------------------------------------------------------------------------------------------|---------------------------------------------------------------------------------------------------------------------------------------------------------------------------------------------------------------------------------------------------------------------------------------------------------------------------------------------------------------------------------------------------------------------------------------------------------------------------------------------------------------------------------------------------------------------------------------------------------------------------------------------------------------------------------------------------------------------------------------------|
| peroxiredoxin 2                                              | Prdx2     | NP_035693    | 22       | 8             | cytoplasm                                                                                                    | antioxidant activity, oxidoreductase activity, peroxidase activity, peroxiredoxin activity, protein binding, selenium binding, thioredoxin peroxidase activity                                                       | activation of MAPK activity, anti-apoptosis, cell redox homeostasis, homeostasis of number of cells, hydrogen peroxide catabolic process, hydrogen peroxide metabolic process, negative regulation of lipopolysaccharide-mediated signaling pathway, negative regulation of NF-kappaB transcription factor activity, negative regulation of oxygen and reactive oxygen species metabolic process, negative regulation of T cell differentiation, oxidation reduction, oxygen and reactive oxygen species metabolic process, regulation of hydrogen peroxide metabolic process, respiratory burst during acute inflammatory response, response to lipopolysaccharide, response to oxidative stress, T cell proliferation, thymus development |
| alpha isoform of regulatory subunit A, protein phosphatase 2 | Ppp2r1a   | NP_058587    | 65       | 8             | cytosol, protein phosphatase type 2A complex                                                                 | binding, protein binding                                                                                                                                                                                             | not classified                                                                                                                                                                                                                                                                                                                                                                                                                                                                                                                                                                                                                                                                                                                              |
| vacuolar protein sorting 35                                  | Vps35     | NP_075373    | 92       | 8             | cytoplasm, integral to membrane, membrane                                                                    | not classified                                                                                                                                                                                                       | protein transport, transport, vacuolar protein processing                                                                                                                                                                                                                                                                                                                                                                                                                                                                                                                                                                                                                                                                                   |
| DnaJ (Hsp40) homolog, subfamily C, member 10                 | Dnajc10   | NP_077143    | 91       | 8             | endoplasmic reticulum, extracellular region                                                                  | heat shock protein binding, unfolded protein binding                                                                                                                                                                 | cell redox homeostasis, protein folding                                                                                                                                                                                                                                                                                                                                                                                                                                                                                                                                                                                                                                                                                                     |
| source of immunodominant MHC-associated peptides             | Stt3b     | NP_077184    | 93       | 8             | cellular_component, endoplasmic reticulum, integral to membrane, membrane, oligosaccharyltransferase complex | dolichyl-diphosphooligosaccharide protein glycotransferase activity, molecular_function, oligosaccharyl transferase activity, transferase activity                                                                   | biological_process, protein amino acid glycosylation, protein amino acid N-linked glycosylation via asparagine                                                                                                                                                                                                                                                                                                                                                                                                                                                                                                                                                                                                                              |
| cytochrome c oxidase, subunit VIb polypeptide 1              | Cox6b1    | NP_079904    | 10       | 8             | mitochondrial inner membrane, mitochondrion                                                                  | cytochrome-c oxidase activity                                                                                                                                                                                        | not classified                                                                                                                                                                                                                                                                                                                                                                                                                                                                                                                                                                                                                                                                                                                              |
| acyl-Coenzyme A dehydrogenase, short/branched chain          | Acadsb    | NP_080102    | 48       | 8             | mitochondrion                                                                                                | acyl-CoA dehydrogenase activity, electron carrier activity, FAD binding, oxidoreductase activity, oxidoreductase activity, acting on the CH-CH group of donors, short-branched-chain-acyl-CoA dehydrogenase activity | fatty acid metabolic process, lipid metabolic process, metabolic process, oxidation reduction                                                                                                                                                                                                                                                                                                                                                                                                                                                                                                                                                                                                                                               |
| NADH dehydrogenase (ubiquinone) Fe-S protein 3               | Ndufs3    | NP_080964    | 30       | 8             | membrane, mitochondrial inner membrane, mitochondrion, respiratory chain                                     | NADH dehydrogenase (ubiquinone) activity, NADH dehydrogenase activity, oxidoreductase activity, oxidoreductase activity, acting on NADH or NADPH                                                                     | biological_process, electron transport chain, oxidation reduction, transport                                                                                                                                                                                                                                                                                                                                                                                                                                                                                                                                                                                                                                                                |

| Protein Name                                               | Gene Name    | Accession No | Mw (kDa) | Peptide Count | GO Component                                                                                                                                                                                     | GO Function                                                                                                                                                                                                                                          | GO Process                                                                                                                   |
|------------------------------------------------------------|--------------|--------------|----------|---------------|--------------------------------------------------------------------------------------------------------------------------------------------------------------------------------------------------|------------------------------------------------------------------------------------------------------------------------------------------------------------------------------------------------------------------------------------------------------|------------------------------------------------------------------------------------------------------------------------------|
| ribosomal protein S27                                      | Rps27        | NP_081291    | 9        | 8             | intracellular, ribonucleoprotein complex, ribosome                                                                                                                                               | metal ion binding, protein binding, structural constituent of ribosome, zinc ion binding                                                                                                                                                             | translation                                                                                                                  |
| eukaryotic translation initiation factor 4A1               | Eif4a1       | NP_659207    | 46       | 8             | not classified                                                                                                                                                                                   | ATP binding, ATP-dependent helicase activity, helicase activity, hydrolase activity, nucleic acid binding, nucleotide binding, RNA binding, translation initiation factor activity                                                                   | translation                                                                                                                  |
| PREDICTED: similar to hCG1640785                           | LOC100045659 | XP_001474736 | 12       | 8             | not classified                                                                                                                                                                                   | not classified                                                                                                                                                                                                                                       | not classified                                                                                                               |
| PREDICTED: similar to serine proteinase inhibitor HongrES1 | Gm46         | XP_001478131 | 47       | 8             | not classified                                                                                                                                                                                   | not classified                                                                                                                                                                                                                                       | not classified                                                                                                               |
| early endosome antigen 1                                   | Eea1         | NP_001001932 | 161      | 7             | cytoplasm, early endosome, endosome, intracellular, membrane, serine-pyruvate aminotransferase complex                                                                                           | metal ion binding, zinc ion binding                                                                                                                                                                                                                  | not classified                                                                                                               |
| aminomethyltransferase                                     | Amt          | NP_001013836 | 44       | 7             | cytoplasm, mitochondrion                                                                                                                                                                         | aminomethyltransferase activity, methyltransferase activity, transaminase activity, transferase activity                                                                                                                                             | glycine catabolic process                                                                                                    |
| NADPH-dependent retinol dehydrogenase/reductase isoform 1  | Dhrs4        | NP_001033027 | 30       | 7             | mitochondrion, peroxisome                                                                                                                                                                        | binding, carbonyl reductase (NADPH) activity, catalytic activity, oxidoreductase activity, retinal dehydrogenase activity                                                                                                                            | metabolic process, oxidation reduction, retinal metabolic process                                                            |
| ribosomal protein S16-like                                 | LOC100039355 | NP_001103687 | 16       | 7             | not classified                                                                                                                                                                                   | not classified                                                                                                                                                                                                                                       | not classified                                                                                                               |
| vacuolar H+ATPase B2                                       | Atp6v1b2     | NP_031535    | 57       | 7             | cytosol, membrane, plasma membrane, proton-transporting two-sector ATPase complex, proton-transporting two-sector ATPase complex, catalytic domain, proton-transporting V-type ATPase, V1 domain | hydrogen ion transporting ATP synthase activity, rotational mechanism, hydrolase activity, hydrolase activity, acting on acid anhydrides, catalyzing transmembrane movement of substances, proton-transporting ATPase activity, rotational mechanism | ATP metabolic process, ATP synthesis coupled proton transport, ion transport, proton transport, transport                    |
| diaphanous homolog 1                                       | Diap1        | NP_031884    | 139      | 7             | cell projection, cytoplasm, cytoskeleton, membrane, plasma membrane                                                                                                                              | actin binding, protein binding, Rho GTPase binding                                                                                                                                                                                                   | actin cytoskeleton organization, actin filament polymerization, cellular component organization, sensory perception of sound |
| glutathione S-transferase, mu 6                            | Gstm6        | NP_032210    | 26       | 7             | cytoplasm                                                                                                                                                                                        | glutathione transferase activity, transferase activity                                                                                                                                                                                               | metabolic process                                                                                                            |

| Protein Name                                 | Gene Name | Accession No | Mw (kDa) | Peptide Count | GO Component                                                                           | GO Function                                                                                                                                                                                                                                                                          | GO Process                                                                                                                                                                                                                                                                                                                                                                                                                                                                                                                                                                                                                                                                              |
|----------------------------------------------|-----------|--------------|----------|---------------|----------------------------------------------------------------------------------------|--------------------------------------------------------------------------------------------------------------------------------------------------------------------------------------------------------------------------------------------------------------------------------------|-----------------------------------------------------------------------------------------------------------------------------------------------------------------------------------------------------------------------------------------------------------------------------------------------------------------------------------------------------------------------------------------------------------------------------------------------------------------------------------------------------------------------------------------------------------------------------------------------------------------------------------------------------------------------------------------|
| indoleamine-pyrrole 2,3 dioxygenase          | Indo      | NP_032350    | 46       | 7             | cytoplasm                                                                              | heme binding, indoleamine 2,3-dioxygenase activity, iron ion binding, metal ion binding, oxidoreductase activity, oxidoreductase activity, acting on single donors with incorporation of molecular oxygen, incorporation of two atoms of oxygen, tryptophan 2,3-dioxygenase activity | behavior, cytokine production during acute inflammatory response, defense response, kynurenic acid biosynthetic process, multicellular organismal response to stress, negative regulation of activated T cell proliferation, negative regulation of interleukin-10 production, negative regulation of T cell apoptosis, negative regulation of T cell proliferation, oxidation reduction, positive regulation of chronic inflammatory response, positive regulation of interleukin-12 production, positive regulation of T cell tolerance induction, positive regulation of T-helper 2 type immune response, response to lipopolysaccharide, tryptophan catabolic process to kynurenine |
| prohibitin                                   | Phb       | NP_032857    | 30       | 7             | membrane, mitochondrial inner membrane, mitochondrion                                  | not classified                                                                                                                                                                                                                                                                       | DNA replication                                                                                                                                                                                                                                                                                                                                                                                                                                                                                                                                                                                                                                                                         |
| ribosomal protein L12                        | Rpl12     | NP_033102    | 18       | 7             | cytoplasm, nucleolus, nucleus, ribonucleoprotein complex, ribosome                     | protein binding, RNA binding, structural constituent of ribosome                                                                                                                                                                                                                     | biological_process, translation                                                                                                                                                                                                                                                                                                                                                                                                                                                                                                                                                                                                                                                         |
| carbonic anhydrase 2                         | Car2      | NP_033931    | 29       | 7             | cytoplasm, cytosol                                                                     | carbonate dehydratase activity, lyase activity, metal ion binding, zinc ion binding                                                                                                                                                                                                  | carbon dioxide transport, morphogenesis of an epithelium, one-carbon metabolic process, secretion                                                                                                                                                                                                                                                                                                                                                                                                                                                                                                                                                                                       |
| creatine kinase, mitochondrial 1, ubiquitous | Ckmt1     | NP_034027    | 47       | 7             | membrane, mitochondrial inner membrane, mitochondrion                                  | ATP binding, catalytic activity, creatine kinase activity, kinase activity, nucleotide binding, transferase activity, transferase activity, transferring phosphorus-containing groups                                                                                                | not classified                                                                                                                                                                                                                                                                                                                                                                                                                                                                                                                                                                                                                                                                          |
| fatty acid binding protein 9, testis         | Fabp9     | NP_035728    | 15       | 7             | cytoplasm                                                                              | binding, lipid binding, transporter activity                                                                                                                                                                                                                                         | transport                                                                                                                                                                                                                                                                                                                                                                                                                                                                                                                                                                                                                                                                               |
| ribosomal protein S3                         | Rps3      | NP_036182    | 27       | 7             | cytoplasm, intracellular, ribonucleoprotein complex, ribosome, small ribosomal subunit | RNA binding, structural constituent of ribosome                                                                                                                                                                                                                                      | translation                                                                                                                                                                                                                                                                                                                                                                                                                                                                                                                                                                                                                                                                             |

| Protein Name                                               | Gene Name | Accession No | Mw (kDa) | Peptide Count | GO Component                                                                                                          | GO Function                                                                                                                                                                                                                                                                                                 | GO Process                                                                                                                                                                                                                                                                                                                                                                                                                                                          |
|------------------------------------------------------------|-----------|--------------|----------|---------------|-----------------------------------------------------------------------------------------------------------------------|-------------------------------------------------------------------------------------------------------------------------------------------------------------------------------------------------------------------------------------------------------------------------------------------------------------|---------------------------------------------------------------------------------------------------------------------------------------------------------------------------------------------------------------------------------------------------------------------------------------------------------------------------------------------------------------------------------------------------------------------------------------------------------------------|
| hypoxanthine guanine phosphoribosyl transferase 1          | Hprt1     | NP_038584    | 25       | 7             | cytoplasm                                                                                                             | hypoxanthine phosphoribosyltransferase activity, identical protein binding, magnesium ion binding, metal ion binding, transferase activity, transferring glycosyl groups                                                                                                                                    | adenine metabolic process, adenine salvage, behavior, central nervous system neuron development, cerebral cortex neuron differentiation, cytolysis, dendrite morphogenesis, dopamine metabolic process, grooming behavior, guanine salvage, hypoxanthine metabolic process, lymphocyte proliferation, nucleoside metabolic process, positive regulation of dopamine metabolic process, purine ribonucleoside salvage, response to amphetamine, striatum development |
| hydroxyacyl-Coenzyme A dehydrogenase type II               | Hsd17b10  | NP_058043    | 27       | 7             | endoplasmic reticulum, mitochondrial inner membrane, mitochondrion                                                    | 3-hydroxy-2-methylbutyryl-CoA dehydrogenase activity, 3-hydroxyacyl-CoA dehydrogenase activity, binding, catalytic activity, oxidoreductase activity                                                                                                                                                        | metabolic process, oxidation reduction, tRNA processing                                                                                                                                                                                                                                                                                                                                                                                                             |
| DnaJ (Hsp40) homolog, subfamily C, member 5                | Dnajc5    | NP_058055    | 22       | 7             | membrane                                                                                                              | heat shock protein binding, unfolded protein binding                                                                                                                                                                                                                                                        | negative regulation of neuron apoptosis, protein folding                                                                                                                                                                                                                                                                                                                                                                                                            |
| coatamer protein complex, subunit gamma isoform 1          | Copg      | NP_059505    | 98       | 7             | COP1 vesicle coat, cytoplasm, cytoplasmic vesicle, Golgi apparatus, Golgi-associated vesicle, membrane, membrane coat | binding, protein binding, structural molecule activity                                                                                                                                                                                                                                                      | intracellular protein transport, protein transport, transport, vesicle-mediated transport                                                                                                                                                                                                                                                                                                                                                                           |
| histone cluster 1, H1b                                     | Hist1h1b  | NP_064418    | 23       | 7             | chromosome, nucleosome, nucleus                                                                                       | DNA binding, protein binding                                                                                                                                                                                                                                                                                | muscle organ development, nucleosome assembly                                                                                                                                                                                                                                                                                                                                                                                                                       |
| adenylate kinase 3                                         | Ak3       | NP_067274    | 25       | 7             | mitochondrion                                                                                                         | adenylate kinase activity, ATP binding, GTP binding, kinase activity, nucleobase, nucleoside, nucleotide kinase activity, nucleoside triphosphate adenylate kinase activity, nucleotide binding, nucleotide kinase activity, phosphotransferase activity, phosphate group as acceptor, transferase activity | nucleobase, nucleoside, nucleotide and nucleic acid metabolic process                                                                                                                                                                                                                                                                                                                                                                                               |
| aspartyl beta-hydroxylase isoform 1                        | Asph      | NP_075553    | 83       | 7             | endoplasmic reticulum, integral to endoplasmic reticulum membrane, integral to membrane, membrane                     | binding, iron ion binding, oxidoreductase activity, oxidoreductase activity, acting on single donors with incorporation of molecular oxygen, incorporation of two atoms of oxygen, peptide, aspartate beta-dioxygenase activity                                                                             | face morphogenesis, limb morphogenesis, negative regulation of cell proliferation, oxidation reduction, palate development, pattern specification process, peptidyl-amino acid modification, peptidyl-aspartic acid hydroxylation                                                                                                                                                                                                                                   |
| eukaryotic translation elongation factor 1 delta isoform b | Eef1d     | NP_075729    | 31       | 7             | eukaryotic translation elongation factor 1 complex                                                                    | translation elongation factor activity                                                                                                                                                                                                                                                                      | translation, translational elongation                                                                                                                                                                                                                                                                                                                                                                                                                               |

| Protein Name                                                                     | Gene Name | Accession No | Mw (kDa) | Peptide Count | GO Component                                                                                            | GO Function                                                                                                                                                                                                                                    | GO Process                                                                                                                                                        |
|----------------------------------------------------------------------------------|-----------|--------------|----------|---------------|---------------------------------------------------------------------------------------------------------|------------------------------------------------------------------------------------------------------------------------------------------------------------------------------------------------------------------------------------------------|-------------------------------------------------------------------------------------------------------------------------------------------------------------------|
| methylcrotonoyl-Coenzyme A carboxylase 1 (alpha)                                 | Mccc1     | NP_076133    | 79       | 7             | mitochondrial inner membrane, mitochondrion                                                             | ATP binding, biotin binding, catalytic activity, ligase activity, methylcrotonoyl-CoA carboxylase activity, nucleotide binding                                                                                                                 | metabolic process                                                                                                                                                 |
| solute carrier family 25 (mitochondrial carrier oxoglutarate carrier), member 11 | Slc25a11  | NP_077173    | 34       | 7             | integral to membrane, membrane, mitochondrial inner membrane, mitochondrion                             | binding, transporter activity                                                                                                                                                                                                                  | transport                                                                                                                                                         |
| NADH dehydrogenase (ubiquinone) 1 alpha subcomplex, 9                            | Ndufa9    | NP_079634    | 43       | 7             | mitochondrial inner membrane, mitochondrion, respiratory chain                                          | binding, catalytic activity, coenzyme binding                                                                                                                                                                                                  | cellular metabolic process, electron transport chain, metabolic process, transport                                                                                |
| signal peptidase complex subunit 2 homolog                                       | Spcc2     | NP_079944    | 25       | 7             | endoplasmic reticulum, integral to membrane, membrane, microsome, signal peptidase complex              | hydrolase activity, peptidase activity                                                                                                                                                                                                         | signal peptide processing                                                                                                                                         |
| N-ethylmaleimide sensitive fusion protein attachment protein alpha               | Napa      | NP_080174    | 33       | 7             | endoplasmic reticulum, Golgi apparatus, membrane, synaptobrevin 2-SNAP-25-syntaxin-1a complex           | binding, SNARE binding, syntaxin binding                                                                                                                                                                                                       | apical protein localization, brain development, intracellular protein transport, neuron differentiation, protein transport, transport, vesicle-mediated transport |
| endoplasmic reticulum protein ERp29 precursor                                    | Erp29     | NP_080405    | 29       | 7             | endoplasmic reticulum, endoplasmic reticulum lumen                                                      | not classified                                                                                                                                                                                                                                 | protein secretion                                                                                                                                                 |
| endoplasmic reticulum-golgi intermediate compartment (ERGIC) 1                   | Ergic1    | NP_080446    | 33       | 7             | endoplasmic reticulum, Golgi apparatus, integral to membrane, membrane                                  | not classified                                                                                                                                                                                                                                 | transport, vesicle-mediated transport                                                                                                                             |
| NADH dehydrogenase (ubiquinone) 1 alpha subcomplex, 8                            | Ndufa8    | NP_080979    | 20       | 7             | mitochondrial inner membrane, mitochondrion, respiratory chain                                          | not classified                                                                                                                                                                                                                                 | electron transport chain, transport                                                                                                                               |
| isocitrate dehydrogenase 3 (NAD+) alpha                                          | ldh3a     | NP_083849    | 40       | 7             | mitochondrion                                                                                           | isocitrate dehydrogenase (NAD+) activity, magnesium ion binding, manganese ion binding, metal ion binding, NAD or NADH binding, oxidoreductase activity, oxidoreductase activity, acting on the CH-OH group of donors, NAD or NADP as acceptor | oxidation reduction, tricarboxylic acid cycle                                                                                                                     |
| LPS-responsive beige-like anchor isoform alpha                                   | Lrba      | NP_109620    | 317      | 7             | cytoplasmic membrane-bounded vesicle                                                                    | protein kinase A binding                                                                                                                                                                                                                       | endosome transport, protein localization, signal transduction                                                                                                     |
| coatamer protein complex, subunit beta 1                                         | Copb1     | NP_203534    | 107      | 7             | COPI vesicle coat, cytoplasm, cytoplasmic vesicle, Golgi apparatus, membrane, membrane coat             | binding, protein binding, structural molecule activity                                                                                                                                                                                         | intracellular protein transport, protein transport, transport, vesicle-mediated transport                                                                         |
| MOCO sulphurase C-terminal domain containing 2                                   | Mosc2     | NP_598445    | 38       | 7             | membrane, mitochondrial inner membrane, mitochondrial outer membrane, mitochondrion                     | catalytic activity, molybdenum ion binding, oxidoreductase activity, pyridoxal phosphate binding                                                                                                                                               | oxidation reduction                                                                                                                                               |
| archain 1                                                                        | Arcn1     | NP_666097    | 57       | 7             | cellular_component, clathrin adaptor complex, cytoplasm, cytoplasmic vesicle, Golgi apparatus, membrane | molecular_function, protein binding                                                                                                                                                                                                            | biological_process, intracellular protein transport, protein transport, transport, vesicle-mediated transport                                                     |
| lysophospholipase-like 1                                                         | Lyplal1   | NP_666218    | 26       | 7             | cytoplasm                                                                                               | hydrolase activity                                                                                                                                                                                                                             | not classified                                                                                                                                                    |
| eukaryotic translation initiation factor 3, subunit C                            | Eif3c     | NP_666312    | 106      | 7             | cytoplasm, eukaryotic translation initiation factor 3 complex                                           | ribosome binding, translation initiation factor activity                                                                                                                                                                                       | translation, translational initiation                                                                                                                             |



| Protein Name                                     | Gene Name      | Accession No | Mw (kDa) | Peptide Count | GO Component                                                             | GO Function                                                                                                                                                                                                                                                                                                                                                                                                                                                                       | GO Process                                                                                                                                                                                                                                                                                                                                                                                                                                                                                                                                                                                                                                                                                                                  |
|--------------------------------------------------|----------------|--------------|----------|---------------|--------------------------------------------------------------------------|-----------------------------------------------------------------------------------------------------------------------------------------------------------------------------------------------------------------------------------------------------------------------------------------------------------------------------------------------------------------------------------------------------------------------------------------------------------------------------------|-----------------------------------------------------------------------------------------------------------------------------------------------------------------------------------------------------------------------------------------------------------------------------------------------------------------------------------------------------------------------------------------------------------------------------------------------------------------------------------------------------------------------------------------------------------------------------------------------------------------------------------------------------------------------------------------------------------------------------|
| NADH dehydrogenase (ubiquinone) Fe-S protein 2   | Ndufs2         | NP_694704    | 53       | 7             | membrane, mitochondrial inner membrane, mitochondrion, respiratory chain | 4 iron, 4 sulfur cluster binding, electron carrier activity, iron ion binding, iron-sulfur cluster binding, metal ion binding, NAD or NADH binding, NADH dehydrogenase (ubiquinone) activity, NADH dehydrogenase activity, oxidoreductase activity, oxidoreductase activity, acting on NADH or NADPH, quinone binding                                                                                                                                                             | biological_process, electron transport chain, oxidation reduction, transport                                                                                                                                                                                                                                                                                                                                                                                                                                                                                                                                                                                                                                                |
| cytochrome P450, family 4, subfamily a family    | Cyp4a12b       | NP_758510    | 58       | 7             | not classified                                                           | iron ion binding, metal ion binding, monooxygenase activity, oxidoreductase activity                                                                                                                                                                                                                                                                                                                                                                                              | oxidation reduction                                                                                                                                                                                                                                                                                                                                                                                                                                                                                                                                                                                                                                                                                                         |
| hypothetical protein LOC109154                   | 2410014A08 Rik | NP_780612    | 32       | 7             | endoplasmic reticulum, integral to membrane, membrane                    | not classified                                                                                                                                                                                                                                                                                                                                                                                                                                                                    | carbohydrate metabolic process                                                                                                                                                                                                                                                                                                                                                                                                                                                                                                                                                                                                                                                                                              |
| ATPase, Na+/K+ transporting, alpha 2 polypeptide | Atp1a2         | NP_848492    | 112      | 7             | integral to membrane, membrane, microsome, sarcolemma                    | ATP binding, ATPase activity, coupled to transmembrane movement of ions, phosphorylative mechanism, catalytic activity, hydrolase activity, hydrolase activity, acting on acid anhydrides, catalyzing transmembrane movement of substances, magnesium ion binding, metal ion binding, monovalent inorganic cation transmembrane transporter activity, nucleotide binding, potassium ion binding, protein binding, sodium ion binding, sodium:potassium-exchanging ATPase activity | adult locomotory behavior, ATP biosynthetic process, cation transport, ion transport, locomotion, metabolic process, monovalent inorganic cation transport, negative regulation of heart contraction, negative regulation of striated muscle contraction, neurotransmitter uptake, potassium ion transport, reduction of cytosolic calcium ion concentration, regulation of blood pressure, regulation of muscle contraction, regulation of respiratory gaseous exchange by neurological system process, regulation of smooth muscle contraction, regulation of striated muscle contraction, regulation of the force of heart contraction, regulation of vasoconstriction, sodium ion transport, transport, visual learning |
| transgelin 2                                     | Tagln2         | NP_848713    | 22       | 7             | not classified                                                           | not classified                                                                                                                                                                                                                                                                                                                                                                                                                                                                    | muscle organ development                                                                                                                                                                                                                                                                                                                                                                                                                                                                                                                                                                                                                                                                                                    |
| DEAD (Asp-Glu-Ala-Asp) box polypeptide 39        | Ddx39          | NP_932099    | 49       | 7             | nucleus                                                                  | ATP binding, ATP-dependent helicase activity, helicase activity, hydrolase activity, nucleic acid binding, nucleotide binding                                                                                                                                                                                                                                                                                                                                                     | mRNA processing, RNA splicing                                                                                                                                                                                                                                                                                                                                                                                                                                                                                                                                                                                                                                                                                               |
| unc-13 homolog D                                 | Unc13d         | NP_001009573 | 123      | 6             | cytoplasm, endosome, lysosome, membrane                                  | protein binding                                                                                                                                                                                                                                                                                                                                                                                                                                                                   | defense response to virus, exocytosis, germinal center formation, granuloma formation, natural killer cell degranulation, phagocytosis                                                                                                                                                                                                                                                                                                                                                                                                                                                                                                                                                                                      |

| Protein Name                                 | Gene Name | Accession No | Mw (kDa) | Peptide Count | GO Component                                                                                                                         | GO Function                                                                                                                                                                                                                                 | GO Process                                                                                                                                                                                                                                                                                                                       |
|----------------------------------------------|-----------|--------------|----------|---------------|--------------------------------------------------------------------------------------------------------------------------------------|---------------------------------------------------------------------------------------------------------------------------------------------------------------------------------------------------------------------------------------------|----------------------------------------------------------------------------------------------------------------------------------------------------------------------------------------------------------------------------------------------------------------------------------------------------------------------------------|
| peroxiredoxin 3                              | Prdx3     | NP_031478    | 28       | 6             | mitochondrion                                                                                                                        | antioxidant activity, identical protein binding, oxidoreductase activity, peroxidase activity, peroxiredoxin activity                                                                                                                       | cell redox homeostasis, hydrogen peroxide catabolic process, maternal placenta development, myeloid cell differentiation, oxidation reduction, response to lipopolysaccharide, response to oxidative stress                                                                                                                      |
| vacuolar H+ ATPase E1                        | Atp6v1e1  | NP_031536    | 26       | 6             | apical plasma membrane, cytoplasm, cytosol, endosome, mitochondrion, proton-transporting two-sector ATPase complex, catalytic domain | hydrogen-exporting ATPase activity, phosphorylative mechanism, hydrolase activity, proton-transporting ATPase activity, rotational mechanism                                                                                                | ATP hydrolysis coupled proton transport, ATP synthesis coupled proton transport, ion transport, proton transport, transport                                                                                                                                                                                                      |
| glutathione peroxidase 4 isoform 2 precursor | Gpx4      | NP_032188    | 22       | 6             | cytoplasm, cytosol, mitochondrial inner membrane, mitochondrion, nuclear envelope, nucleus                                           | glutathione peroxidase activity, oxidoreductase activity, peroxidase activity, phospholipid-hydroperoxide glutathione peroxidase activity, selenium binding                                                                                 | chromatin organization, multicellular organismal development, oxidation reduction, response to oxidative stress, spermatogenesis                                                                                                                                                                                                 |
| heat-responsive protein 12                   | Hrsp12    | NP_032313    | 14       | 6             | not classified                                                                                                                       | endonuclease activity, hydrolase activity, nuclease activity                                                                                                                                                                                | not classified                                                                                                                                                                                                                                                                                                                   |
| hydroxysteroid (17-beta) dehydrogenase 4     | Hsd17b4   | NP_032318    | 79       | 6             | mitochondrion, peroxisome                                                                                                            | 3alpha,7alpha,12alpha-trihydroxy-5beta-cholest-24-enoyl-CoA hydratase activity, 3-hydroxyacyl-CoA dehydrogenase activity, binding, catalytic activity, isomerase activity, lyase activity, oxidoreductase activity, sterol carrier activity | fatty acid beta-oxidation, fatty acid metabolic process, lipid metabolic process, metabolic process, oxidation reduction, Sertoli cell development, very-long-chain fatty acid metabolic process                                                                                                                                 |
| poly A binding protein, cytoplasmic 1        | Pabpc1    | NP_032800    | 71       | 6             | cytoplasm, nucleus, spliceosomal complex                                                                                             | nucleic acid binding, nucleotide binding, poly(A) RNA binding, RNA binding                                                                                                                                                                  | mRNA processing, RNA splicing                                                                                                                                                                                                                                                                                                    |
| SEC23A                                       | Sec23a    | NP_033173    | 86       | 6             | COPII vesicle coat, endoplasmic reticulum, Golgi apparatus, Golgi membrane, membrane, perinuclear region of cytoplasm                | protein binding, zinc ion binding                                                                                                                                                                                                           | ER to Golgi vesicle-mediated transport, intracellular protein transport, protein transport, transport, vesicle-mediated transport                                                                                                                                                                                                |
| transglutaminase 2, C polypeptide            | Tgm2      | NP_033399    | 77       | 6             | cytoplasm, cytosol, membrane, proteinaceous extracellular matrix                                                                     | acyltransferase activity, calcium ion binding, GTP binding, metal ion binding, protein-glutamine gamma-glutamyltransferase activity, transferase activity                                                                                   | activation of phospholipase C activity by G-protein coupled receptor protein signaling pathway coupled to IP3 second messenger, branching involved in salivary gland morphogenesis, G-protein coupled receptor protein signaling pathway, peptide cross-linking, positive regulation of cell adhesion, salivary gland cavitation |
| ubiquitin specific protease 9, X chromosome  | Usp9x     | NP_033507    | 290      | 6             | cytoplasm                                                                                                                            | cysteine-type peptidase activity, hydrolase activity, peptidase activity, protein binding, ubiquitin thioesterase activity                                                                                                                  | cell cycle, cell division, chromosome segregation, mitosis, modification-dependent protein catabolic process, ubiquitin-dependent protein catabolic process                                                                                                                                                                      |
| cysteine-rich secretory protein 1            | Crisp1    | NP_033768    | 28       | 6             | extracellular region                                                                                                                 | not classified                                                                                                                                                                                                                              | not classified                                                                                                                                                                                                                                                                                                                   |

| Protein Name                                                                 | Gene Name | Accession No | Mw (kDa) | Peptide Count | GO Component                                                                                                                                                                                 | GO Function                                                                                                                                                                         | GO Process                                                                                                                                                                                                                                                     |
|------------------------------------------------------------------------------|-----------|--------------|----------|---------------|----------------------------------------------------------------------------------------------------------------------------------------------------------------------------------------------|-------------------------------------------------------------------------------------------------------------------------------------------------------------------------------------|----------------------------------------------------------------------------------------------------------------------------------------------------------------------------------------------------------------------------------------------------------------|
| adaptor protein complex AP-1, gamma 1 subunit                                | Ap1g1     | NP_033807    | 92       | 6             | clathrin adaptor complex, clathrin-coated vesicle, cytoplasmic vesicle, Golgi apparatus, Golgi apparatus part, membrane, membrane coat, perinuclear region of cytoplasm, trans-Golgi network | binding, protein binding, protein transporter activity                                                                                                                              | endocytosis, intracellular protein transport, protein transport, transport, vesicle-mediated transport                                                                                                                                                         |
| catenin alpha 1                                                              | Ctnna1    | NP_033948    | 100      | 6             | actin cytoskeleton, adherens junction, cell junction, cytoplasm, cytoskeleton, lamellipodium, membrane, plasma membrane, zonula adherens                                                     | actin filament binding, cadherin binding, protein binding, structural molecule activity                                                                                             | apical junction assembly, cell adhesion, establishment or maintenance of cell polarity, negative regulation of apoptosis, negative regulation of neuroblast proliferation, positive regulation of smoothed signaling pathway, regulation of cell proliferation |
| chaperonin subunit 8 (theta)                                                 | Cct8      | NP_033970    | 60       | 6             | cytoplasm                                                                                                                                                                                    | ATP binding, nucleotide binding, protein binding, unfolded protein binding                                                                                                          | cellular protein metabolic process, protein folding                                                                                                                                                                                                            |
| CD2-associated protein                                                       | Cd2ap     | NP_033977    | 70       | 6             | cell cortex, cell projection, cytoplasm, cytoskeleton                                                                                                                                        | protein binding, SH3 domain binding                                                                                                                                                 | biological_process, cell cycle, cell division, mitosis                                                                                                                                                                                                         |
| dodecenoyl-Coenzyme A delta isomerase (3,2 trans-enoyl-Coenzyme A isomerase) | Dci       | NP_034153    | 32       | 6             | mitochondrial inner membrane, mitochondrion                                                                                                                                                  | catalytic activity, dodecenoyl-CoA delta-isomerase activity, isomerase activity                                                                                                     | fatty acid beta-oxidation, fatty acid metabolic process, lipid metabolic process, metabolic process                                                                                                                                                            |
| fumarate hydratase 1                                                         | Fh1       | NP_034339    | 54       | 6             | cytoplasm, mitochondrion, tricarboxylic acid cycle enzyme complex                                                                                                                            | catalytic activity, fumarate hydratase activity, lyase activity                                                                                                                     | fumarate metabolic process, homeostasis of number of cells within a tissue, tricarboxylic acid cycle                                                                                                                                                           |
| t-complex protein 10b                                                        | Tcp10b    | NP_035683    | 49       | 6             | not classified                                                                                                                                                                               | not classified                                                                                                                                                                      | not classified                                                                                                                                                                                                                                                 |
| nuclease sensitive element binding protein 1                                 | Ybx1      | NP_035862    | 36       | 6             | cytoplasm, nucleus                                                                                                                                                                           | DNA binding, nucleic acid binding, protein binding, RNA binding, single-stranded DNA binding                                                                                        | in utero embryonic development, mRNA processing, regulation of transcription, regulation of transcription, DNA-dependent, RNA splicing, transcription                                                                                                          |
| poly(rC) binding protein 1                                                   | Pcbp1     | NP_035995    | 37       | 6             | nucleus, ribonucleoprotein complex                                                                                                                                                           | DNA binding, protein binding, RNA binding, translation activator activity                                                                                                           | mRNA processing                                                                                                                                                                                                                                                |
| myosin, heavy polypeptide 11, smooth muscle                                  | Myh11     | NP_038635    | 223      | 6             | cytoplasm, muscle myosin complex, myosin complex, myosin filament, smooth muscle contractile fiber, stress fiber                                                                             | actin binding, ATP binding, calmodulin binding, motor activity, nucleotide binding                                                                                                  | smooth muscle contraction                                                                                                                                                                                                                                      |
| inositol (myo)-1(or 4)-monophosphatase 1                                     | Impa1     | NP_061352    | 30       | 6             | cellular_component, cytoplasm                                                                                                                                                                | hydrolase activity, inositol or phosphatidylinositol phosphatase activity, inositol-1(or 4)-monophosphatase activity, lithium ion binding, magnesium ion binding, metal ion binding | inositol metabolic process                                                                                                                                                                                                                                     |
| cleft lip and palate associated transmembrane protein 1                      | Clptm1    | NP_062623    | 75       | 6             | external side of plasma membrane, integral to membrane, membrane                                                                                                                             | not classified                                                                                                                                                                      | cell differentiation, multicellular organismal development, regulation of T cell differentiation in the thymus                                                                                                                                                 |
| sorting nexin 1                                                              | Snx1      | NP_062701    | 59       | 6             | endosome, Golgi apparatus, membrane                                                                                                                                                          | phosphoinositide binding, protein binding, protein transporter activity                                                                                                             | cell communication, intracellular protein transport, protein transport, transport                                                                                                                                                                              |

| Protein Name                                                                           | Gene Name | Accession No | Mw (kDa) | Peptide Count | GO Component                                                                                                                      | GO Function                                                                                                                                                                                                                 | GO Process                                                                                                                                                                |
|----------------------------------------------------------------------------------------|-----------|--------------|----------|---------------|-----------------------------------------------------------------------------------------------------------------------------------|-----------------------------------------------------------------------------------------------------------------------------------------------------------------------------------------------------------------------------|---------------------------------------------------------------------------------------------------------------------------------------------------------------------------|
| succinate-CoA ligase, GDP-forming, alpha subunit                                       | Suc1g1    | NP_063932    | 35       | 6             | mitochondrial inner membrane, mitochondrion                                                                                       | ATP citrate synthase activity, binding, catalytic activity, GTP binding, ligase activity, nucleotide binding, succinate-CoA ligase (ADP-forming) activity, succinate-CoA ligase (GDP-forming) activity                      | metabolic process, tricarboxylic acid cycle                                                                                                                               |
| actinin alpha 4                                                                        | Actn4     | NP_068695    | 105      | 6             | cortical cytoskeleton, cytoplasm, pseudopodium, stress fiber                                                                      | actin binding, actin filament binding, calcium ion binding, protein homodimerization activity                                                                                                                               | actin filament bundle formation, negative regulation of cell motion, positive regulation of cell motion, positive regulation of pinocytosis, protein transport, transport |
| prostaglandin E synthase                                                               | Ptges     | NP_071860    | 17       | 6             | cytoplasm, integral to membrane, membrane, microsome, nuclear envelope lumen, nucleus                                             | isomerase activity, prostaglandin-D synthase activity, prostaglandin-E synthase activity                                                                                                                                    | negative regulation of cell proliferation, prostaglandin metabolic process                                                                                                |
| ribosomal protein S19                                                                  | Rps19     | NP_075622    | 16       | 6             | intracellular, nucleolus, ribonucleoprotein complex, ribosome                                                                     | protein binding, structural constituent of ribosome                                                                                                                                                                         | translation                                                                                                                                                               |
| L-specific multifunctional beta-oxidation protein                                      | Ehhadh    | NP_076226    | 78       | 6             | mitochondrion, peroxisome                                                                                                         | 3-hydroxyacyl-CoA dehydrogenase activity, binding, catalytic activity, coenzyme binding, dodecenoyl-CoA delta-isomerase activity, enoyl-CoA hydratase activity, isomerase activity, lyase activity, oxidoreductase activity | acyl-CoA metabolic process, fatty acid beta-oxidation, fatty acid metabolic process, lipid metabolic process, metabolic process, oxidation reduction                      |
| NADH dehydrogenase (ubiquinone) 1 alpha subcomplex 10                                  | Ndufa10   | NP_077159    | 41       | 6             | mitochondrion, respiratory chain                                                                                                  | ATP binding, phosphotransferase activity, alcohol group as acceptor                                                                                                                                                         | electron transport chain, nucleobase, nucleoside, nucleotide and nucleic acid metabolic process, transport                                                                |
| pyruvate dehydrogenase (lipoamide) beta                                                | Pdhb      | NP_077183    | 39       | 6             | mitochondrion                                                                                                                     | catalytic activity, oxidoreductase activity, pyruvate dehydrogenase (acetyl-transferring) activity                                                                                                                          | glycolysis, metabolic process, oxidation reduction                                                                                                                        |
| transmembrane emp24 domain containing 3                                                | Tmed3     | NP_079636    | 25       | 6             | Golgi apparatus, integral to membrane, membrane                                                                                   | not classified                                                                                                                                                                                                              | protein transport, transport                                                                                                                                              |
| electron transferring flavoprotein, dehydrogenase                                      | Etfdh     | NP_080070    | 68       | 6             | integral to membrane, membrane, mitochondrial electron transfer flavoprotein complex, mitochondrial inner membrane, mitochondrion | 4 iron, 4 sulfur cluster binding, electron-transferring-flavoprotein dehydrogenase activity, iron ion binding, iron-sulfur cluster binding, metal ion binding, molecular_function, oxidoreductase activity                  | biological_process, electron transport chain, oxidation reduction, response to oxidative stress, transport                                                                |
| ribosomal protein L14                                                                  | Rpl14     | NP_080250    | 24       | 6             | cellular_component, intracellular, ribonucleoprotein complex, ribosome                                                            | molecular_function, structural constituent of ribosome                                                                                                                                                                      | biological_process, translation                                                                                                                                           |
| biphenyl hydrolase-like (serine hydrolase, breast epithelial mucin-associated antigen) | Bphl      | NP_080788    | 33       | 6             | cytoplasm, mitochondrion                                                                                                          | hydrolase activity                                                                                                                                                                                                          | not classified                                                                                                                                                            |
| RAB14, member RAS oncogene family                                                      | Rab14     | NP_080973    | 24       | 6             | membrane, plasma membrane                                                                                                         | GTP binding, nucleotide binding                                                                                                                                                                                             | protein transport, small GTPase mediated signal transduction, transport                                                                                                   |
| methyltransferase like 7A1                                                             | Mettl7a1  | NP_081610    | 28       | 6             | not classified                                                                                                                    | methyltransferase activity, transferase activity                                                                                                                                                                            | not classified                                                                                                                                                            |

| Protein Name                                                | Gene Name | Accession No | Mw (kDa) | Peptide Count | GO Component                                                                                                          | GO Function                                                                                                                                                                                                                                                                                                                             | GO Process                                                                                                              |
|-------------------------------------------------------------|-----------|--------------|----------|---------------|-----------------------------------------------------------------------------------------------------------------------|-----------------------------------------------------------------------------------------------------------------------------------------------------------------------------------------------------------------------------------------------------------------------------------------------------------------------------------------|-------------------------------------------------------------------------------------------------------------------------|
| protease, serine, 15                                        | Lonp1     | NP_083058    | 106      | 6             | mitochondrion                                                                                                         | ATP binding, ATPase activity, ATP-dependent peptidase activity, DNA binding, hydrolase activity, mitochondrial light strand promoter anti-sense binding, nucleoside-triphosphatase activity, nucleotide binding, peptidase activity, serine-type endopeptidase activity, serine-type peptidase activity, single-stranded DNA binding    | ATP catabolic process, proteolysis                                                                                      |
| SAC1 (suppressor of actin mutations 1, homolog)-like        | Sacm1l    | NP_109617    | 67       | 6             | cellular_component, endoplasmic reticulum, integral to membrane, membrane                                             | hydrolase activity, molecular_function                                                                                                                                                                                                                                                                                                  | biological_process                                                                                                      |
| chloride intracellular channel 1                            | Clic1     | NP_254279    | 27       | 6             | chloride channel complex, cytoplasm, integral to membrane, membrane, nuclear envelope, nucleus, plasma membrane       | chloride channel activity, chloride ion binding, ion channel activity, protein binding, voltage-gated chloride channel activity, voltage-gated ion channel activity                                                                                                                                                                     | chloride transport, ion transport, transport                                                                            |
| pyrroline-5-carboxylate reductase family, member 2          | Pycr2     | NP_598466    | 34       | 6             | not classified                                                                                                        | binding, catalytic activity, oxidoreductase activity, pyrroline-5-carboxylate reductase activity                                                                                                                                                                                                                                        | cellular amino acid biosynthetic process, metabolic process, oxidation reduction, proline biosynthetic process          |
| Rho GDP dissociation inhibitor (GDI) alpha                  | Arhgdia   | NP_598557    | 23       | 6             | cytoplasm, immunological synapse                                                                                      | GTPase activator activity, protein binding, Rho GDP dissociation inhibitor activity                                                                                                                                                                                                                                                     | regulation of protein localization, Rho protein signal transduction                                                     |
| ATPase, H+ transporting, lysosomal V1 subunit H             | Atp6v1h   | NP_598587    | 56       | 6             | vacuolar proton-transporting V-type ATPase, V1 domain                                                                 | binding, hydrolase activity, acting on acid anhydrides, catalyzing transmembrane movement of substances, proton-transporting ATPase activity, rotational mechanism                                                                                                                                                                      | ATP synthesis coupled proton transport, ion transport, proton transport, transport                                      |
| glutathione S-transferase, theta 3                          | Gstt3     | NP_598755    | 27       | 6             | cellular_component                                                                                                    | glutathione transferase activity, transferase activity                                                                                                                                                                                                                                                                                  | glutathione metabolic process                                                                                           |
| CDGSH iron sulfur domain 1                                  | Cisd1     | NP_598768    | 12       | 6             | integral to membrane, intracellular membrane-bounded organelle, membrane, mitochondrial outer membrane, mitochondrion | 2 iron, 2 sulfur cluster binding, iron ion binding, iron-sulfur cluster binding, metal ion binding                                                                                                                                                                                                                                      | regulation of cellular respiration                                                                                      |
| ATP citrate lyase                                           | Acly      | NP_598798    | 120      | 6             | cytoplasm, intracellular                                                                                              | ATP binding, ATP citrate synthase activity, binding, catalytic activity, lyase activity, magnesium ion binding, metal ion binding, nucleotide binding, protein binding, succinate-CoA ligase (ADP-forming) activity, transferase activity, transferase activity, transferring acyl groups, acyl groups converted into alkyl on transfer | acetyl-CoA biosynthetic process, cellular carbohydrate metabolic process, lipid biosynthetic process, metabolic process |
| proteasome 26S non-ATPase subunit 2                         | Psm2      | NP_598862    | 100      | 6             | proteasome complex                                                                                                    | enzyme regulator activity                                                                                                                                                                                                                                                                                                               | regulation of protein catabolic process                                                                                 |
| es1 protein                                                 | D10Jhu81e | NP_613067    | 28       | 6             | centriole, mitochondrion                                                                                              | molecular_function                                                                                                                                                                                                                                                                                                                      | biological_process                                                                                                      |
| solute carrier organic anion transporter family, member 4a1 | Slco4a1   | NP_683735    | 78       | 6             | integral to membrane, integral to plasma membrane, membrane                                                           | organic anion transmembrane transporter activity, transporter activity                                                                                                                                                                                                                                                                  | ion transport, organic anion transport, transport                                                                       |

| Protein Name                                                                              | Gene Name         | Accession No | Mw (kDa) | Peptide Count | GO Component                                         | GO Function                                                                                                                                                                                         | GO Process                                                                                                                                                                                                                                                                 |
|-------------------------------------------------------------------------------------------|-------------------|--------------|----------|---------------|------------------------------------------------------|-----------------------------------------------------------------------------------------------------------------------------------------------------------------------------------------------------|----------------------------------------------------------------------------------------------------------------------------------------------------------------------------------------------------------------------------------------------------------------------------|
| sulfite oxidase                                                                           | Suox              | NP_776094    | 61       | 6             | mitochondrion                                        | electron carrier activity, heme binding, iron ion binding, metal ion binding, molybdenum ion binding, oxidoreductase activity, sulfite oxidase activity                                             | oxidation reduction                                                                                                                                                                                                                                                        |
| PREDICTED: hypothetical protein                                                           | LOC433745         | XP_001476854 | 21       | 6             | not classified                                       | not classified                                                                                                                                                                                      | not classified                                                                                                                                                                                                                                                             |
| PREDICTED: similar to Tubulin, beta 4                                                     | LOC100042651      | XP_001479082 | 50       | 6             | not classified                                       | not classified                                                                                                                                                                                      | not classified                                                                                                                                                                                                                                                             |
| PREDICTED: similar to ubiquitin A-52 residue ribosomal protein fusion product 1 isoform 2 | LOC629750         | XP_899768    | 15       | 6             | not classified                                       | not classified                                                                                                                                                                                      | not classified                                                                                                                                                                                                                                                             |
| ubiquitin specific protease 14 isoform 2                                                  | Usp14             | NP_001033678 | 52       | 5             | soluble fraction, synaptosome                        | cysteine-type peptidase activity, hydrolase activity, peptidase activity, ubiquitin thiolesterase activity                                                                                          | modification-dependent protein catabolic process, synaptic transmission, ubiquitin-dependent protein catabolic process                                                                                                                                                     |
| WAP four-disulfide core domain 15                                                         | Wfdc15b           | NP_001039019 | 9        | 5             | extracellular region                                 | peptidase inhibitor activity                                                                                                                                                                        | defense response to bacterium                                                                                                                                                                                                                                              |
| phosphogluconate dehydrogenase                                                            | Pgd               | NP_001074743 | 53       | 5             | not classified                                       | binding, catalytic activity, coenzyme binding, NADP or NADPH binding, oxidoreductase activity, phosphogluconate 2-dehydrogenase activity, phosphogluconate dehydrogenase (decarboxylating) activity | metabolic process, oxidation reduction, pentose biosynthetic process, pentose-phosphate shunt                                                                                                                                                                              |
| predicted gene, OTTMUSG00000002778                                                        | OTTMUSG0000002778 | NP_001104805 | 12       | 5             | not classified                                       | not classified                                                                                                                                                                                      | not classified                                                                                                                                                                                                                                                             |
| alcohol dehydrogenase 1 (class I)                                                         | Adh1              | NP_031435    | 40       | 5             | cytoplasm, intracellular, mitochondrion              | alcohol dehydrogenase (NAD) activity, metal ion binding, oxidoreductase activity, protein homodimerization activity, zinc ion binding                                                               | behavioral response to ethanol, ethanol catabolic process, oxidation reduction, response to retinoic acid, response to steroid hormone stimulus, response to testosterone stimulus, retinoic acid metabolic process, retinoid metabolic process, retinol metabolic process |
| chaperonin containing Tcp1, subunit 7 (eta)                                               | Cct7              | NP_031664    | 60       | 5             | chaperonin-containing T-complex, cytoplasm           | ATP binding, identical protein binding, nucleotide binding, protein binding, unfolded protein binding                                                                                               | cellular protein metabolic process, protein folding                                                                                                                                                                                                                        |
| cathepsin B preproprotein                                                                 | Ctsb              | NP_031824    | 37       | 5             | lysosome, mitochondrion                              | cysteine-type endopeptidase activity, cysteine-type peptidase activity, hydrolase activity, peptidase activity                                                                                      | proteolysis, regulation of catalytic activity                                                                                                                                                                                                                              |
| glioblastoma amplified                                                                    | Gbas              | NP_032121    | 33       | 5             | mitochondrion                                        | molecular_function                                                                                                                                                                                  | biological_process                                                                                                                                                                                                                                                         |
| guanosine diphosphate (GDP) dissociation inhibitor 2                                      | Gdi2              | NP_032138    | 51       | 5             | cytoplasm, Golgi apparatus, membrane                 | GTPase activator activity, Rab GDP-dissociation inhibitor activity, Rab GTPase activator activity                                                                                                   | protein transport, regulation of GTPase activity, small GTPase mediated signal transduction                                                                                                                                                                                |
| glucose phosphate isomerase 1                                                             | Gpi1              | NP_032181    | 63       | 5             | cytoplasm, extracellular region, extracellular space | cytokine activity, glucose-6-phosphate isomerase activity, growth factor activity, isomerase activity, protein binding                                                                              | angiogenesis, gluconeogenesis, glucose metabolic process, glycolysis                                                                                                                                                                                                       |
| L-3-hydroxyacyl-Coenzyme A dehydrogenase                                                  | Hadh              | NP_032238    | 34       | 5             | mitochondrial inner membrane, mitochondrion          | 3-hydroxyacyl-CoA dehydrogenase activity, binding, catalytic activity, coenzyme binding, oxidoreductase activity                                                                                    | fatty acid metabolic process, lipid metabolic process, metabolic process, oxidation reduction                                                                                                                                                                              |

| Protein Name                                                                  | Gene Name | Accession No | Mw (kDa) | Peptide Count | GO Component                                                                                                                                                                                        | GO Function                                                                                                                                                                                                    | GO Process                                                                                                                                                             |
|-------------------------------------------------------------------------------|-----------|--------------|----------|---------------|-----------------------------------------------------------------------------------------------------------------------------------------------------------------------------------------------------|----------------------------------------------------------------------------------------------------------------------------------------------------------------------------------------------------------------|------------------------------------------------------------------------------------------------------------------------------------------------------------------------|
| heat shock protein 1 (chaperonin 10)                                          | Hspe1     | NP_032329    | 11       | 5             | cytoplasm, mitochondrion                                                                                                                                                                            | ATP binding                                                                                                                                                                                                    | protein folding, response to stress                                                                                                                                    |
| CUB and zona pellucida-like domains 1                                         | Cuzd1     | NP_032437    | 68       | 5             | cytoplasmic vesicle, integral to membrane, membrane, zymogen granule, zymogen granule membrane                                                                                                      | protein binding                                                                                                                                                                                                | cell adhesion, cell cycle, cell division                                                                                                                               |
| kinectin 1                                                                    | Ktn1      | NP_032503    | 153      | 5             | endoplasmic reticulum, integral to membrane, membrane                                                                                                                                               | kinesin binding                                                                                                                                                                                                | microtubule-based movement                                                                                                                                             |
| pyruvate dehydrogenase E1 alpha 1                                             | Pdha1     | NP_032836    | 43       | 5             | intracellular membrane-bounded organelle, mitochondrion                                                                                                                                             | oxidoreductase activity, oxidoreductase activity, acting on the aldehyde or oxo group of donors, disulfide as acceptor, pyruvate dehydrogenase (acetyl-transferring) activity, pyruvate dehydrogenase activity | glycolysis, metabolic process, oxidation reduction                                                                                                                     |
| purine rich element binding protein A                                         | Pura      | NP_033015    | 35       | 5             | cytoplasm, nucleus                                                                                                                                                                                  | DNA binding, double-stranded DNA binding, protein binding, SMAD binding, transcription factor activity                                                                                                         | negative regulation of transcription, DNA-dependent, nervous system development, positive regulation of cell proliferation, regulation of transcription, transcription |
| ribosomal protein L22                                                         | Rpl22     | NP_033105    | 15       | 5             | cytoplasm, intracellular, ribonucleoprotein complex, ribosome                                                                                                                                       | heparin binding, RNA binding, structural constituent of ribosome                                                                                                                                               | alpha-beta T cell differentiation, translation                                                                                                                         |
| ribosomal protein S5                                                          | Rps5      | NP_033121    | 23       | 5             | intracellular, ribonucleoprotein complex, ribosome, small ribosomal subunit                                                                                                                         | structural constituent of ribosome                                                                                                                                                                             | translation                                                                                                                                                            |
| adaptor protein complex AP-1, mu 2 subunit isoform 2                          | Ap1m2     | NP_033808    | 48       | 5             | clathrin adaptor complex, cytoplasmic vesicle, Golgi apparatus, membrane, trans-Golgi network                                                                                                       | protein binding                                                                                                                                                                                                | intracellular protein transport, protein transport, transport, vesicle-mediated transport                                                                              |
| ATP synthase, H+ transporting, mitochondrial F0 complex, subunit b, isoform 1 | Atp5f1    | NP_033855    | 29       | 5             | membrane, mitochondrial inner membrane, mitochondrial proton-transporting ATP synthase complex, coupling factor F(o), mitochondrion, proton-transporting ATP synthase complex, coupling factor F(o) | hydrogen ion transmembrane transporter activity                                                                                                                                                                | ATP synthesis coupled proton transport, ion transport, proton transport, transport                                                                                     |
| chaperonin containing Tcp1, subunit 3 (gamma)                                 | Cct3      | NP_033966    | 61       | 5             | chaperonin-containing T-complex, cytoplasm                                                                                                                                                          | ATP binding, nucleotide binding, protein binding, unfolded protein binding                                                                                                                                     | cellular protein metabolic process, protein folding                                                                                                                    |
| carnitine palmitoyltransferase 2                                              | Cpt2      | NP_034079    | 74       | 5             | membrane, mitochondrial inner membrane, mitochondrion                                                                                                                                               | acyltransferase activity, carnitine O-palmitoyltransferase activity, transferase activity                                                                                                                      | fatty acid metabolic process, lipid metabolic process, transport                                                                                                       |
| glutathione S-transferase, alpha 4                                            | Gsta4     | NP_034487    | 26       | 5             | cellular_component, cytoplasm                                                                                                                                                                       | glutathione transferase activity, transferase activity                                                                                                                                                         | metabolic process                                                                                                                                                      |
| keratin complex 2, basic, gene 6b                                             | Krt6b     | NP_034799    | 60       | 5             | intermediate filament, keratin filament                                                                                                                                                             | structural molecule activity                                                                                                                                                                                   | intermediate filament organization, keratinization, morphogenesis of an epithelium                                                                                     |
| lysosomal membrane glycoprotein 1                                             | Lamp1     | NP_034814    | 44       | 5             | endosome, external side of plasma membrane, integral to membrane, late endosome, lysosome, melanosome, membrane, multivesicular body, plasma membrane, sarcolemma                                   | protein binding                                                                                                                                                                                                | not classified                                                                                                                                                         |

| Protein Name                                                      | Gene Name | Accession No | Mw (kDa) | Peptide Count | GO Component                                                                                                        | GO Function                                                                                                                                                                                                   | GO Process                                                                                                                                                                                                                                  |
|-------------------------------------------------------------------|-----------|--------------|----------|---------------|---------------------------------------------------------------------------------------------------------------------|---------------------------------------------------------------------------------------------------------------------------------------------------------------------------------------------------------------|---------------------------------------------------------------------------------------------------------------------------------------------------------------------------------------------------------------------------------------------|
| mannosidase 2, alpha B1                                           | Man2b1    | NP_034894    | 115      | 5             | lysosome                                                                                                            | alpha-mannosidase activity, hydrolase activity, hydrolase activity, acting on glycosyl bonds, hydrolase activity, hydrolyzing O-glycosyl compounds, mannosidase activity, metal ion binding, zinc ion binding | carbohydrate metabolic process, learning or memory, mannose metabolic process, metabolic process                                                                                                                                            |
| myosin, light polypeptide 6, alkali, smooth muscle and non-muscle | Myl6      | NP_034990    | 17       | 5             | myosin complex, unconventional myosin complex                                                                       | calcium ion binding, motor activity, structural constituent of muscle                                                                                                                                         | muscle filament sliding, skeletal muscle tissue development                                                                                                                                                                                 |
| NADH dehydrogenase (ubiquinone) 1 alpha subcomplex, 2             | Ndufa2    | NP_035015    | 11       | 5             | membrane, mitochondrial inner membrane, mitochondrial respiratory chain complex I, mitochondrion, respiratory chain | NADH dehydrogenase (ubiquinone) activity                                                                                                                                                                      | electron transport chain, transport                                                                                                                                                                                                         |
| ErbB3-binding protein 1                                           | Pa2g4     | NP_035249    | 44       | 5             | cytoplasm, nucleus, ribonucleoprotein complex                                                                       | DNA binding, protein binding, RNA binding, transcription factor activity                                                                                                                                      | cellular process, negative regulation of transcription, DNA-dependent, regulation of transcription, regulation of translation, rRNA processing, transcription                                                                               |
| prosaposin                                                        | Psap      | NP_035309    | 61       | 5             | extracellular region, lysosome, mitochondrion                                                                       | not classified                                                                                                                                                                                                | developmental growth, epithelial cell differentiation involved in prostate gland development, lipid metabolic process, prostate gland growth, regulation of MAPKKK cascade, sphingolipid metabolic process                                  |
| serine (or cysteine) proteinase inhibitor, clade B, member 6b     | Serpib6b  | NP_035584    | 43       | 5             | not classified                                                                                                      | not classified                                                                                                                                                                                                | not classified                                                                                                                                                                                                                              |
| vimentin                                                          | Vim       | NP_035831    | 54       | 5             | cell leading edge, cytoplasm, cytoskeleton, intermediate filament, type III intermediate filament                   | protein binding, structural molecule activity                                                                                                                                                                 | intermediate filament-based process                                                                                                                                                                                                         |
| stress-induced phosphoprotein 1                                   | Stip1     | NP_058017    | 63       | 5             | cytoplasm, nucleus                                                                                                  | binding                                                                                                                                                                                                       | not classified                                                                                                                                                                                                                              |
| ribosomal protein L13                                             | Rpl13     | NP_058018    | 24       | 5             | cellular_component, intracellular, ribonucleoprotein complex, ribosome                                              | molecular_function, structural constituent of ribosome                                                                                                                                                        | biological_process, translation                                                                                                                                                                                                             |
| nucleobindin 2 isoform 2                                          | Nucb2     | NP_058053    | 50       | 5             | cytoplasm, endoplasmic reticulum, nuclear outer membrane, nucleus                                                   | calcium ion binding, DNA binding                                                                                                                                                                              | cellular calcium ion homeostasis                                                                                                                                                                                                            |
| esterase D/formylglutathione hydrolase                            | Esd       | NP_058599    | 31       | 5             | cytoplasm, cytoplasmic membrane-bounded vesicle, cytoplasmic vesicle                                                | carboxylesterase activity, hydrolase activity, hydrolase activity, acting on ester bonds, S-formylglutathione hydrolase activity                                                                              | not classified                                                                                                                                                                                                                              |
| stratifin                                                         | Sfn       | NP_061224    | 28       | 5             | cytoplasm, extracellular region, nucleus                                                                            | protein domain specific binding                                                                                                                                                                               | keratinocyte differentiation, keratinocyte proliferation, negative regulation of cell proliferation, positive regulation of cell growth, regulation of cell cycle, regulation of cyclin-dependent protein kinase activity, skin development |



| Protein Name                                              | Gene Name | Accession No | Mw (kDa) | Peptide Count | GO Component                                                                                            | GO Function                                                                                                                                                                                           | GO Process                                                                                                                                                                          |
|-----------------------------------------------------------|-----------|--------------|----------|---------------|---------------------------------------------------------------------------------------------------------|-------------------------------------------------------------------------------------------------------------------------------------------------------------------------------------------------------|-------------------------------------------------------------------------------------------------------------------------------------------------------------------------------------|
| hydroxysteroid (17-beta) dehydrogenase 12 protein         | Hsd17b12  | NP_062631    | 35       | 5             | endoplasmic reticulum, extracellular matrix, integral to membrane, membrane                             | binding, catalytic activity, collagen binding, estradiol 17-beta-dehydrogenase activity, fibronectin binding, heparin binding, oxidoreductase activity                                                | extracellular matrix organization, lipid biosynthetic process, metabolic process, oxidation reduction, positive regulation of cell-substrate adhesion, steroid biosynthetic process |
| leucine zipper-EF-hand containing transmembrane protein 1 | Letm1     | NP_062668    | 83       | 5             | integral to membrane, membrane, mitochondrial inner membrane, mitochondrion                             | calcium ion binding                                                                                                                                                                                   | not classified                                                                                                                                                                      |
| isovaleryl coenzyme A dehydrogenase                       | Ivd       | NP_062800    | 46       | 5             | mitochondrion                                                                                           | acyl-CoA dehydrogenase activity, electron carrier activity, FAD binding, isovaleryl-CoA dehydrogenase activity, oxidoreductase activity, oxidoreductase activity, acting on the CH-CH group of donors | metabolic process, oxidation reduction                                                                                                                                              |
| heterogeneous nuclear ribonucleoprotein H2                | Hnrnp2    | NP_063921    | 49       | 5             | nucleus, ribonucleoprotein complex                                                                      | molecular_function, nucleic acid binding, nucleotide binding, RNA binding                                                                                                                             | biological_process                                                                                                                                                                  |
| keratin 71                                                | Krt71     | NP_064340    | 57       | 5             | intermediate filament, keratin filament                                                                 | structural constituent of cytoskeleton, structural molecule activity                                                                                                                                  | cytoskeleton organization, hair follicle morphogenesis                                                                                                                              |
| ribosomal protein S14                                     | Rps14     | NP_065625    | 16       | 5             | intracellular, ribonucleoprotein complex, ribosome                                                      | structural constituent of ribosome                                                                                                                                                                    | translation                                                                                                                                                                         |
| poly(rC) binding protein 3                                | Pcbp3     | NP_067543    | 36       | 5             | cytoplasm, ribonucleoprotein complex                                                                    | DNA binding, RNA binding                                                                                                                                                                              | not classified                                                                                                                                                                      |
| NADH dehydrogenase (ubiquinone) 1 alpha subcomplex, 13    | Ndufa13   | NP_075801    | 17       | 5             | integral to membrane, membrane, mitochondrial inner membrane, mitochondrion, nucleus, respiratory chain | ATP binding                                                                                                                                                                                           | apoptosis, electron transport chain, transport                                                                                                                                      |
| lectin, mannose-binding 2                                 | Lman2     | NP_080104    | 40       | 5             | Golgi apparatus, integral to membrane, membrane                                                         | calcium ion binding, sugar binding                                                                                                                                                                    | protein transport, transport                                                                                                                                                        |
| acyl-Coenzyme A dehydrogenase family, member 8            | Acad8     | NP_080138    | 45       | 5             | mitochondrion                                                                                           | acyl-CoA dehydrogenase activity, electron carrier activity, FAD binding, oxidoreductase activity, oxidoreductase activity, acting on the CH-CH group of donors                                        | branched chain family amino acid catabolic process, metabolic process, oxidation reduction                                                                                          |
| RAB5A, member RAS oncogene family                         | Rab5a     | NP_080163    | 24       | 5             | early endosome, endocytic vesicle, endosome, membrane, membrane raft, plasma membrane, ruffle           | GTP binding, GTPase activity, guanyl nucleotide binding, nucleotide binding                                                                                                                           | endocytosis, protein transport, small GTPase mediated signal transduction, transport                                                                                                |
| ribosomal protein L11                                     | Rpl11     | NP_080195    | 20       | 5             | cellular_component, intracellular, ribonucleoprotein complex, ribosome                                  | protein binding, RNA binding, rRNA binding, structural constituent of ribosome                                                                                                                        | biological_process, translation                                                                                                                                                     |
| ribosomal protein, large P2                               | Rplp2     | NP_080296    | 12       | 5             | cellular_component, intracellular, ribonucleoprotein complex, ribosome                                  | molecular_function, structural constituent of ribosome                                                                                                                                                | biological_process, translational elongation                                                                                                                                        |
| 2,4-dienoyl CoA reductase 1, mitochondrial                | Decr1     | NP_080448    | 36       | 5             | mitochondrion                                                                                           | 2,4-dienoyl-CoA reductase (NADPH) activity, binding, catalytic activity, oxidoreductase activity                                                                                                      | metabolic process, oxidation reduction                                                                                                                                              |
| transmembrane emp24 protein transport domain containing 9 | Tmed9     | NP_080487    | 27       | 5             | endoplasmic reticulum, integral to membrane, membrane                                                   | not classified                                                                                                                                                                                        | transport                                                                                                                                                                           |

| Protein Name                                                             | Gene Name      | Accession No | Mw (kDa) | Peptide Count | GO Component                                                                                            | GO Function                                                                                                                                                                                                | GO Process                                                                                                                                                                                                              |
|--------------------------------------------------------------------------|----------------|--------------|----------|---------------|---------------------------------------------------------------------------------------------------------|------------------------------------------------------------------------------------------------------------------------------------------------------------------------------------------------------------|-------------------------------------------------------------------------------------------------------------------------------------------------------------------------------------------------------------------------|
| transmembrane emp24 domain-containing protein 10                         | Tmed10         | NP_081051    | 25       | 5             | cis-Golgi network, Golgi apparatus, integral to membrane, membrane, zymogen granule membrane            | not classified                                                                                                                                                                                             | intracellular protein transport, protein transport, regulated secretory pathway, transport, vesicle targeting, to, from or within Golgi, vesicle-mediated transport                                                     |
| dehydrogenase/reductase (SDR family) member 1                            | Dhrs1          | NP_081095    | 34       | 5             | mitochondrial inner membrane                                                                            | binding, catalytic activity, oxidoreductase activity                                                                                                                                                       | metabolic process, oxidation reduction                                                                                                                                                                                  |
| chloride intracellular channel 3                                         | Clic3          | NP_081361    | 27       | 5             | chloride channel complex, cytoplasm, integral to membrane, membrane, nucleus                            | chloride channel activity, chloride ion binding, ion channel activity, voltage-gated chloride channel activity, voltage-gated ion channel activity                                                         | chloride transport, ion transport, transport                                                                                                                                                                            |
| AFG3(ATPase family gene 3)-like 2                                        | Afg3l2         | NP_081406    | 90       | 5             | integral to membrane, membrane, mitochondrial inner membrane, mitochondrion                             | ATP binding, hydrolase activity, metal ion binding, metalloendopeptidase activity, metallopeptidase activity, nucleoside-triphosphatase activity, nucleotide binding, peptidase activity, zinc ion binding | axonogenesis, death, muscle fiber development, myelination, nerve development, neuromuscular junction development, protein catabolic process, proteolysis, regulation of multicellular organism growth, righting reflex |
| annexin A13                                                              | Anxa13         | NP_081487    | 36       | 5             | membrane, plasma membrane                                                                               | calcium ion binding, calcium-dependent phospholipid binding                                                                                                                                                | not classified                                                                                                                                                                                                          |
| brain abundant, membrane attached signal protein 1                       | Basp1          | NP_081671    | 22       | 5             | cell projection, membrane, plasma membrane                                                              | not classified                                                                                                                                                                                             | not classified                                                                                                                                                                                                          |
| RIKEN cDNA 2310001A20                                                    | 2310001A20 Rik | NP_082253    | 46       | 5             | integral to membrane, membrane                                                                          | strictosidine synthase activity                                                                                                                                                                            | biosynthetic process                                                                                                                                                                                                    |
| sideroflexin 3                                                           | Sfxn3          | NP_444427    | 35       | 5             | integral to membrane, membrane, mitochondrion                                                           | cation transmembrane transporter activity, iron ion binding                                                                                                                                                | cation transport, ion transport, iron ion transport, transport                                                                                                                                                          |
| transmembrane 9 superfamily member 2                                     | Tm9sf2         | NP_542123    | 75       | 5             | endosome, integral to membrane, membrane                                                                | not classified                                                                                                                                                                                             | not classified                                                                                                                                                                                                          |
| transmembrane 9 superfamily protein member 4                             | Tm9sf4         | NP_598608    | 75       | 5             | integral to membrane, membrane                                                                          | not classified                                                                                                                                                                                             | not classified                                                                                                                                                                                                          |
| D6Wsu176e protein                                                        | D6Wsu176e      | NP_613053    | 25       | 5             | extracellular region                                                                                    | not classified                                                                                                                                                                                             | not classified                                                                                                                                                                                                          |
| eukaryotic translation termination factor 1                              | Etf1           | NP_659115    | 49       | 5             | cellular_component, cytoplasm                                                                           | translation release factor activity, translation release factor activity, codon specific                                                                                                                   | protein amino acid methylation, translation, translational termination                                                                                                                                                  |
| apolipoprotein A-I binding protein                                       | Apoa1bp        | NP_659146    | 31       | 5             | cellular_component, extracellular region                                                                | protein binding                                                                                                                                                                                            | biological_process                                                                                                                                                                                                      |
| eukaryotic translation initiation factor 3 subunit 6 interacting protein | Eif3eip        | NP_660121    | 67       | 5             | cytoplasm, eukaryotic translation initiation factor 3 complex, fibrillar center, nucleolus, nucleoplasm | protein binding, translation initiation factor activity                                                                                                                                                    | translation, translational initiation                                                                                                                                                                                   |
| 3-hydroxyisobutyrate dehydrogenase precursor                             | Hibadh         | NP_663542    | 35       | 5             | mitochondrion                                                                                           | 3-hydroxyisobutyrate dehydrogenase activity, binding, catalytic activity, coenzyme binding, NAD or NADH binding, oxidoreductase activity, phosphogluconate dehydrogenase (decarboxylating) activity        | metabolic process, oxidation reduction, pentose-phosphate shunt, valine metabolic process                                                                                                                               |
| Rho GTPase activating protein 1                                          | Arhgap1        | NP_66236     | 50       | 5             | cell leading edge, cytoplasm, intracellular, plasma membrane, ruffle                                    | GTPase activator activity, protein binding, Rac GTPase activator activity, Rho GTPase activator activity, SH3 domain binding                                                                               | regulation of GTPase activity, signal transduction, small GTPase mediated signal transduction                                                                                                                           |

| Protein Name                                                    | Gene Name     | Accession No | Mw (kDa) | Peptide Count | GO Component                                                                                                                               | GO Function                                                                                                                                                                                                                                 | GO Process                                                                                                                                                                                                                                    |
|-----------------------------------------------------------------|---------------|--------------|----------|---------------|--------------------------------------------------------------------------------------------------------------------------------------------|---------------------------------------------------------------------------------------------------------------------------------------------------------------------------------------------------------------------------------------------|-----------------------------------------------------------------------------------------------------------------------------------------------------------------------------------------------------------------------------------------------|
| aspartyl-tRNA synthetase                                        | Dars          | NP_803228    | 57       | 5             | cytoplasm                                                                                                                                  | aminoacyl-tRNA ligase activity, aspartate-tRNA ligase activity, ATP binding, ligase activity, nucleic acid binding, nucleotide binding                                                                                                      | aspartyl-tRNA aminoacylation, translation, tRNA aminoacylation for protein translation                                                                                                                                                        |
| cytochrome c oxidase subunit II                                 | COX2          | NP_904331    | 26       | 5             | integral to membrane, membrane, mitochondrial inner membrane, mitochondrion, respiratory chain                                             | copper ion binding, cytochrome-c oxidase activity, electron carrier activity, metal ion binding, oxidoreductase activity                                                                                                                    | electron transport chain, oxidation reduction, transport                                                                                                                                                                                      |
| PREDICTED: similar to AFG3(ATPase family gene 3)-like 2 (yeast) | LOC100048880  | XP_001472434 | 33       | 5             | not classified                                                                                                                             | not classified                                                                                                                                                                                                                              | not classified                                                                                                                                                                                                                                |
| PREDICTED: similar to Protein disulfide isomerase associated 6  | LOC100046302  | XP_001476035 | 43       | 5             | not classified                                                                                                                             | not classified                                                                                                                                                                                                                              | not classified                                                                                                                                                                                                                                |
| PREDICTED: hypothetical protein                                 | LOC100047156  | XP_001477347 | 24       | 5             | not classified                                                                                                                             | not classified                                                                                                                                                                                                                              | not classified                                                                                                                                                                                                                                |
| PREDICTED: hypothetical protein                                 | LOC100042503  | XP_001478493 | 15       | 5             | not classified                                                                                                                             | not classified                                                                                                                                                                                                                              | not classified                                                                                                                                                                                                                                |
| PREDICTED: similar to GPI inositol-deacylase                    | D230012E17Rik | XP_912118    | 105      | 5             | endoplasmic reticulum, integral to membrane, intrinsic to endoplasmic reticulum membrane, membrane                                         | hydrolase activity, hydrolase activity, acting on ester bonds                                                                                                                                                                               | anterior/posterior axis specification, embryonic pattern specification, forebrain regionalization, GPI anchor metabolic process, head development, intracellular protein transport, protein transport, sensory perception of sound, transport |
| reticulon 3 isoform 1                                           | Rtn3          | NP_001003934 | 104      | 4             | endoplasmic reticulum, Golgi apparatus, integral to membrane, membrane                                                                     | molecular_function, protein binding                                                                                                                                                                                                         | apoptosis, transport, vesicle-mediated transport                                                                                                                                                                                              |
| hypothetical protein LOC102502                                  | A1427122      | NP_001028382 | 70       | 4             | cytoplasm                                                                                                                                  | actin binding, calcium ion binding, molecular_function                                                                                                                                                                                      | biological_process                                                                                                                                                                                                                            |
| adenylate kinase 2 isoform a                                    | Ak2           | NP_001029138 | 26       | 4             | mitochondrial inner membrane, mitochondrion                                                                                                | adenylate kinase activity, ATP binding, kinase activity, nucleobase, nucleoside, nucleotide kinase activity, nucleotide binding, nucleotide kinase activity, phosphotransferase activity, phosphate group as acceptor, transferase activity | nucleobase, nucleoside, nucleotide and nucleic acid metabolic process                                                                                                                                                                         |
| hypothetical protein LOC381062 isoform 1                        | 2210404J11Rik | NP_001034641 | 70       | 4             | not classified                                                                                                                             | not classified                                                                                                                                                                                                                              | not classified                                                                                                                                                                                                                                |
| hypothetical protein LOC68646 isoform 2                         | 1110020G09Rik | NP_001035485 | 48       | 4             | mitochondrion                                                                                                                              | NAD+ kinase activity                                                                                                                                                                                                                        | metabolic process                                                                                                                                                                                                                             |
| myosin IC isoform b                                             | Myo1c         | NP_001074243 | 118      | 4             | brush border, cell projection, cytoplasm, membrane, myosin complex, myosin I complex, nuclear pore, nucleus, plasma membrane, stereocilium | actin binding, ATP binding, calmodulin binding, motor activity, nucleotide binding, phospholipid binding, protein binding, protein C-terminus binding                                                                                       | mRNA transport, protein transport, transmembrane transport, transport                                                                                                                                                                         |
| predicted gene, EG668668                                        | EG668668      | NP_001074505 | 30       | 4             | not classified                                                                                                                             | not classified                                                                                                                                                                                                                              | not classified                                                                                                                                                                                                                                |

| Protein Name                                               | Gene Name          | Accession No | Mw (kDa) | Peptide Count | GO Component                                                                                                                                                 | GO Function                                                                                                                                                                                         | GO Process                                                                                                                                                                                                                                                                                                                                                                                                                                                                                                                                                                                                                                                                                                                                                                                                                                                                                                              |
|------------------------------------------------------------|--------------------|--------------|----------|---------------|--------------------------------------------------------------------------------------------------------------------------------------------------------------|-----------------------------------------------------------------------------------------------------------------------------------------------------------------------------------------------------|-------------------------------------------------------------------------------------------------------------------------------------------------------------------------------------------------------------------------------------------------------------------------------------------------------------------------------------------------------------------------------------------------------------------------------------------------------------------------------------------------------------------------------------------------------------------------------------------------------------------------------------------------------------------------------------------------------------------------------------------------------------------------------------------------------------------------------------------------------------------------------------------------------------------------|
| methyl CpG binding protein 2 isoform 1                     | Mecp2              | NP_001075448 | 54       | 4             | cytoplasm, cytosol, heterochromatin, nucleus                                                                                                                 | DNA binding, double-stranded methylated DNA binding, methyl-CpG binding, mRNA binding, siRNA binding, transcription factor activity, transcription factor binding, transcription repressor activity | adult locomotory behavior, behavioral fear response, biogenic amine metabolic process, brain development, cardiolipin metabolic process, catecholamine secretion, cerebellum development, chromatin silencing, dendrite development, embryonic development, genetic imprinting, glucocorticoid metabolic process, glutamine metabolic process, histone acetylation, histone methylation, inositol metabolic process, learning, long-term memory, long-term synaptic potentiation, memory, mitochondrial electron transport, ubiquinol to cytochrome c, negative regulation of histone acetylation, negative regulation of histone methylation, negative regulation of neuron apoptosis, negative regulation of transcription, negative regulation of transcription, DNA-dependent, neurological system process involved in regulation of systemic arterial blood pressure, neuromuscular process, neuromuscular process |
| radixin isoform a                                          | Rdx                | NP_001098086 | 69       | 4             | apical part of cell, cytoplasm, cytoskeleton, extrinsic to membrane, filopodium, lamellipodium, membrane, microvillus, plasma membrane, ruffle, stereocilium | actin binding, binding, cytoskeletal protein binding, protein binding                                                                                                                               | actin filament capping, apical protein localization, microvillus assembly                                                                                                                                                                                                                                                                                                                                                                                                                                                                                                                                                                                                                                                                                                                                                                                                                                               |
| annexin A6 isoform b                                       | Anxa6              | NP_001103681 | 75       | 4             | cytoplasm, perinuclear region of cytoplasm                                                                                                                   | calcium ion binding, calcium-dependent phospholipid binding                                                                                                                                         | calcium ion transport, regulation of muscle contraction                                                                                                                                                                                                                                                                                                                                                                                                                                                                                                                                                                                                                                                                                                                                                                                                                                                                 |
| ribosomal protein L27-like                                 | EG621100           | NP_001103809 | 16       | 4             | not classified                                                                                                                                               | not classified                                                                                                                                                                                      | not classified                                                                                                                                                                                                                                                                                                                                                                                                                                                                                                                                                                                                                                                                                                                                                                                                                                                                                                          |
| predicted gene, ENSMUSG00000059775                         | ENSMUSG00000059775 | NP_001104770 | 13       | 4             | not classified                                                                                                                                               | not classified                                                                                                                                                                                      | not classified                                                                                                                                                                                                                                                                                                                                                                                                                                                                                                                                                                                                                                                                                                                                                                                                                                                                                                          |
| similar to Tu translation elongation factor, mitochondrial | LOC100041265       | NP_001104813 | 50       | 4             | not classified                                                                                                                                               | not classified                                                                                                                                                                                      | not classified                                                                                                                                                                                                                                                                                                                                                                                                                                                                                                                                                                                                                                                                                                                                                                                                                                                                                                          |
| defender against cell death 1                              | Dad1               | NP_001106829 | 12       | 4             | integral to membrane, membrane                                                                                                                               | dolichyl-diphosphooligosaccharide protein glycotransferase activity, transferase activity                                                                                                           | anti-apoptosis, apoptosis, blastocyst development                                                                                                                                                                                                                                                                                                                                                                                                                                                                                                                                                                                                                                                                                                                                                                                                                                                                       |
| adaptor protein complex AP-2, alpha 2 subunit              | Ap2a2              | NP_031485    | 104      | 4             | clathrin adaptor complex, coated pit, membrane, membrane coat, plasma membrane, secretory granule                                                            | binding, lipid binding, protein binding, protein transporter activity                                                                                                                               | endocytosis, intracellular protein transport, protein transport, transport, vesicle-mediated transport                                                                                                                                                                                                                                                                                                                                                                                                                                                                                                                                                                                                                                                                                                                                                                                                                  |
| ADP-ribosylation factor 4                                  | Arf4               | NP_031505    | 20       | 4             | cytoplasm, Golgi apparatus, intracellular, plasma membrane                                                                                                   | GTP binding, nucleotide binding                                                                                                                                                                     | protein transport, small GTPase mediated signal transduction, transport, vesicle-mediated transport                                                                                                                                                                                                                                                                                                                                                                                                                                                                                                                                                                                                                                                                                                                                                                                                                     |
| heterogeneous nuclear ribonucleoprotein D isoform c        | Hnrnpd             | NP_031542    | 33       | 4             | chromosome, nucleus, ribonucleoprotein complex                                                                                                               | DNA binding, nucleic acid binding, nucleotide binding, protein binding, RNA binding                                                                                                                 | regulation of mRNA stability, regulation of transcription, transcription                                                                                                                                                                                                                                                                                                                                                                                                                                                                                                                                                                                                                                                                                                                                                                                                                                                |
| CAP, adenylate cyclase-associated protein 1                | Cap1               | NP_031624    | 52       | 4             | cortical actin cytoskeleton, cytoplasm, membrane, plasma membrane                                                                                            | actin binding, binding                                                                                                                                                                              | actin cytoskeleton organization, amoeboid cell migration, cell morphogenesis, cytoskeleton organization, receptor-mediated endocytosis                                                                                                                                                                                                                                                                                                                                                                                                                                                                                                                                                                                                                                                                                                                                                                                  |

| Protein Name                                    | Gene Name | Accession No | Mw (kDa) | Peptide Count | GO Component                                                                               | GO Function                                                                                                                                                                                                                                                                  | GO Process                                                                                                                                                                                                                                          |
|-------------------------------------------------|-----------|--------------|----------|---------------|--------------------------------------------------------------------------------------------|------------------------------------------------------------------------------------------------------------------------------------------------------------------------------------------------------------------------------------------------------------------------------|-----------------------------------------------------------------------------------------------------------------------------------------------------------------------------------------------------------------------------------------------------|
| gelsolin-like capping protein                   | Capg      | NP_031625    | 39       | 4             | cytoplasm, extracellular region, nucleus                                                   | actin binding                                                                                                                                                                                                                                                                | actin filament capping, cell projection assembly                                                                                                                                                                                                    |
| chaperonin containing Tcp1, subunit 5 (epsilon) | Cct5      | NP_031663    | 60       | 4             | chaperonin-containing T-complex, cytoplasm                                                 | ATP binding, nucleotide binding, protein binding, unfolded protein binding                                                                                                                                                                                                   | cellular protein metabolic process, protein folding                                                                                                                                                                                                 |
| cold inducible RNA binding protein              | Cirbp     | NP_031731    | 19       | 4             | nucleus                                                                                    | nucleic acid binding, nucleotide binding, RNA binding                                                                                                                                                                                                                        | response to stress                                                                                                                                                                                                                                  |
| dynactin 1                                      | Dctn1     | NP_031861    | 142      | 4             | cell leading edge, cytoplasm, cytoskeleton, dynein complex, microtubule                    | motor activity, protein binding                                                                                                                                                                                                                                              | not classified                                                                                                                                                                                                                                      |
| histidine triad nucleotide binding protein 1    | Hint1     | NP_032274    | 14       | 4             | cytoplasm, nucleus                                                                         | hydrolase activity                                                                                                                                                                                                                                                           | not classified                                                                                                                                                                                                                                      |
| leukotriene A4 hydrolase                        | Lta4h     | NP_032543    | 69       | 4             | cytoplasm                                                                                  | catalytic activity, hydrolase activity, leukotriene-A4 hydrolase activity, metal ion binding, metallopeptidase activity, peptidase activity, zinc ion binding                                                                                                                | leukotriene biosynthetic process, proteolysis                                                                                                                                                                                                       |
| phosphoglycerate kinase 1                       | Pgk1      | NP_032854    | 45       | 4             | cytoplasm                                                                                  | ATP binding, kinase activity, nucleotide binding, phosphoglycerate kinase activity, transferase activity                                                                                                                                                                     | glycolysis                                                                                                                                                                                                                                          |
| lysophospholipase 1                             | Lypla1    | NP_032892    | 25       | 4             | cytoplasm, mitochondrion                                                                   | hydrolase activity                                                                                                                                                                                                                                                           | fatty acid metabolic process, lipid metabolic process                                                                                                                                                                                               |
| prostaglandin H2 D-isomerase                    | Ptgds     | NP_032989    | 21       | 4             | cytoplasm, endoplasmic reticulum, extracellular region, Golgi apparatus, membrane, nucleus | binding, isomerase activity, prostaglandin-D synthase activity, transporter activity                                                                                                                                                                                         | fatty acid biosynthetic process, lipid biosynthetic process, lipid metabolic process, prostaglandin biosynthetic process, regulation of circadian sleep/wake cycle, sleep, transport                                                                |
| prostaglandin-endoperoxide synthase 1           | Ptgs1     | NP_032995    | 69       | 4             | cytoplasm, endoplasmic reticulum, membrane, microsome, nucleus                             | heme binding, iron ion binding, metal ion binding, oxidoreductase activity, oxidoreductase activity, acting on single donors with incorporation of molecular oxygen, incorporation of two atoms of oxygen, peroxidase activity, prostaglandin-endoperoxide synthase activity | fatty acid biosynthetic process, lipid biosynthetic process, oxidation reduction, prostaglandin biosynthetic process, prostaglandin metabolic process, regulation of blood pressure, regulation of cell proliferation, response to oxidative stress |
| RAB1, member RAS oncogene family                | Rab1      | NP_033022    | 23       | 4             | endoplasmic reticulum, Golgi apparatus                                                     | GTP binding, nucleotide binding                                                                                                                                                                                                                                              | ER to Golgi vesicle-mediated transport, intracellular protein transport, protein transport, small GTPase mediated signal transduction, transport, vesicle-mediated transport                                                                        |

| Protein Name                                               | Gene Name | Accession No | Mw (kDa) | Peptide Count | GO Component                                                                                                                                                               | GO Function                                                                                                                                                                                                                                          | GO Process                                                                                                                                                                                                                                                                                                                                                                                                                                                                                                                          |
|------------------------------------------------------------|-----------|--------------|----------|---------------|----------------------------------------------------------------------------------------------------------------------------------------------------------------------------|------------------------------------------------------------------------------------------------------------------------------------------------------------------------------------------------------------------------------------------------------|-------------------------------------------------------------------------------------------------------------------------------------------------------------------------------------------------------------------------------------------------------------------------------------------------------------------------------------------------------------------------------------------------------------------------------------------------------------------------------------------------------------------------------------|
| RAS-related C3 botulinum substrate 1                       | Rac1      | NP_033033    | 21       | 4             | cell projection, cytoplasm, cytoplasmic membrane-bounded vesicle, extrinsic to plasma membrane, intracellular, lamellipodium, membrane, membrane fraction, plasma membrane | GTP binding, GTPase activity, nucleotide binding, protein binding                                                                                                                                                                                    | axon guidance, cell adhesion, cell migration, cerebral cortex radially oriented cell migration, cytoskeleton organization, dendrite development, embryonic olfactory bulb interneuron precursor migration, endocytosis, hyperosmotic response, lamellipodium assembly, positive regulation of actin filament polymerization, positive regulation of lamellipodium assembly, positive regulation of phosphoinositide 3-kinase activity, regulation of cell migration, ruffle organization, small GTPase mediated signal transduction |
| retinoblastoma binding protein 7                           | Rbbp7     | NP_033057    | 48       | 4             | nucleus, NuRD complex                                                                                                                                                      | protein binding, transcription repressor activity                                                                                                                                                                                                    | chromatin modification, chromatin remodeling, DNA replication, negative regulation of transcription from RNA polymerase II promoter, regulation of transcription, transcription                                                                                                                                                                                                                                                                                                                                                     |
| reticulocalbin 1                                           | Rcn1      | NP_033063    | 38       | 4             | endoplasmic reticulum                                                                                                                                                      | calcium ion binding                                                                                                                                                                                                                                  | not classified                                                                                                                                                                                                                                                                                                                                                                                                                                                                                                                      |
| SAR1a gene homolog                                         | Sar1a     | NP_033146    | 22       | 4             | endoplasmic reticulum, Golgi apparatus, intracellular, sarcoplasmic reticulum                                                                                              | GTP binding, nucleotide binding                                                                                                                                                                                                                      | intracellular protein transport, protein transport, transport, vesicle-mediated transport                                                                                                                                                                                                                                                                                                                                                                                                                                           |
| signal sequence receptor, delta                            | Ssr4      | NP_033305    | 19       | 4             | endoplasmic reticulum, integral to membrane, membrane                                                                                                                      | receptor activity                                                                                                                                                                                                                                    | not classified                                                                                                                                                                                                                                                                                                                                                                                                                                                                                                                      |
| topoisomerase (DNA) I                                      | Top1      | NP_033434    | 91       | 4             | chromosome, cytoplasm, nucleus, perikaryon                                                                                                                                 | ATP binding, DNA binding, DNA topoisomerase (ATP-hydrolyzing) activity, DNA topoisomerase activity, DNA topoisomerase type I activity, isomerase activity, nucleotide binding                                                                        | DNA replication, DNA topological change, embryonic cleavage                                                                                                                                                                                                                                                                                                                                                                                                                                                                         |
| aldo-keto reductase family 1, member B3 (aldose reductase) | Akr1b3    | NP_033788    | 36       | 4             | cytoplasm                                                                                                                                                                  | aldehyde reductase activity, oxidoreductase activity                                                                                                                                                                                                 | oxidation reduction                                                                                                                                                                                                                                                                                                                                                                                                                                                                                                                 |
| cathepsin D                                                | Ctsd      | NP_034113    | 45       | 4             | lysosome, mitochondrion                                                                                                                                                    | aspartic-type endopeptidase activity, hydrolase activity, peptidase activity                                                                                                                                                                         | autophagic vacuole formation, proteolysis                                                                                                                                                                                                                                                                                                                                                                                                                                                                                           |
| glutamate oxaloacetate transaminase 1, soluble             | Got1      | NP_034454    | 46       | 4             | cytoplasm, cytosol                                                                                                                                                         | catalytic activity, L-aspartate:2-oxoglutarate aminotransferase activity, phosphatidylserine decarboxylase activity, pyridoxal phosphate binding, transaminase activity, transferase activity, transferase activity, transferring nitrogenous groups | aspartate biosynthetic process, biosynthetic process, cellular amino acid metabolic process, fatty acid homeostasis, glutamate catabolic process to 2-oxoglutarate, glutamate catabolic process to aspartate, glycerol biosynthetic process, oxaloacetate metabolic process                                                                                                                                                                                                                                                         |

| Protein Name                                                          | Gene Name | Accession No | Mw (kDa) | Peptide Count | GO Component                                                                                                                                                                            | GO Function                                                                                                                                                                                                                                         | GO Process                                                                                                                                                                                                                                      |
|-----------------------------------------------------------------------|-----------|--------------|----------|---------------|-----------------------------------------------------------------------------------------------------------------------------------------------------------------------------------------|-----------------------------------------------------------------------------------------------------------------------------------------------------------------------------------------------------------------------------------------------------|-------------------------------------------------------------------------------------------------------------------------------------------------------------------------------------------------------------------------------------------------|
| glutathione reductase 1 precursor                                     | Gsr       | NP_034474    | 54       | 4             | cytoplasm, external side of plasma membrane, mitochondrion                                                                                                                              | FAD binding, glutathione-disulfide reductase activity, NADP or NADPH binding, oxidoreductase activity                                                                                                                                               | cell redox homeostasis, glutathione metabolic process, oxidation reduction                                                                                                                                                                      |
| junction plakoglobin                                                  | Jup       | NP_034723    | 82       | 4             | cell junction, cell-cell adherens junction, cell-cell junction, cytoplasm, cytoskeleton, cytosol, desmosome, membrane, Z disc                                                           | binding, protein binding, RPTP-like protein binding                                                                                                                                                                                                 | cell adhesion                                                                                                                                                                                                                                   |
| lysosomal membrane glycoprotein 2 isoform 2                           | Lamp2     | NP_034815    | 46       | 4             | endosome, integral to membrane, late endosome, lysosomal membrane, lysosome, membrane, membrane fraction, phagocytic vesicle membrane, plasma membrane, platelet dense granule membrane | not classified                                                                                                                                                                                                                                      | not classified                                                                                                                                                                                                                                  |
| programmed cell death 6 interacting protein                           | Pdcd6ip   | NP_035182    | 96       | 4             | cytoplasm, cytosol                                                                                                                                                                      | protein binding                                                                                                                                                                                                                                     | apoptosis, cell cycle, cell division, protein transport, transport                                                                                                                                                                              |
| proline dehydrogenase                                                 | Prodh     | NP_035302    | 68       | 4             | mitochondrial inner membrane, mitochondrion                                                                                                                                             | oxidoreductase activity, proline dehydrogenase activity                                                                                                                                                                                             | glutamate biosynthetic process, oxidation reduction, proline catabolic process, proline metabolic process                                                                                                                                       |
| prostaglandin-endoperoxide synthase 2                                 | Ptgs2     | NP_035328    | 69       | 4             | cytoplasm, endoplasmic reticulum, membrane, microsome, nucleus                                                                                                                          | heme binding, iron ion binding, metal ion binding, oxidoreductase activity, acting on single donors with incorporation of molecular oxygen, incorporation of two atoms of oxygen, peroxidase activity, prostaglandin-endoperoxide synthase activity | anagen, bone mineralization, fatty acid biosynthetic process, lipid biosynthetic process, oxidation reduction, prostaglandin biosynthetic process, regulation of blood pressure, regulation of cell proliferation, response to oxidative stress |
| proteasome 26S non-ATPase subunit 13                                  | Psm13     | NP_036005    | 43       | 4             | proteasome complex, proteasome regulatory particle                                                                                                                                      | endopeptidase activity                                                                                                                                                                                                                              | meiosis I                                                                                                                                                                                                                                       |
| H2A histone family, member Y                                          | H2afy     | NP_036145    | 40       | 4             | Barr body, centrosome, chromosome, condensed chromosome, nucleosome, nucleus                                                                                                            | chromatin binding, DNA binding                                                                                                                                                                                                                      | chromatin modification, dosage compensation, nucleosome assembly                                                                                                                                                                                |
| vesicle amine transport protein 1 homolog (T californica)             | Vat1      | NP_036167    | 43       | 4             | not classified                                                                                                                                                                          | binding, catalytic activity, oxidoreductase activity, zinc ion binding                                                                                                                                                                              | metabolic process, oxidation reduction                                                                                                                                                                                                          |
| low density lipoprotein receptor-related protein associated protein 1 | Lrpap1    | NP_038615    | 42       | 4             | cytoplasm, endoplasmic reticulum, plasma membrane                                                                                                                                       | heparin binding, low-density lipoprotein receptor binding, receptor activity                                                                                                                                                                        | not classified                                                                                                                                                                                                                                  |
| vesicle-associated membrane protein, associated protein A             | Vapa      | NP_038961    | 28       | 4             | endoplasmic reticulum, integral to membrane, membrane, microtubule, plasma membrane                                                                                                     | molecular_function, structural molecule activity                                                                                                                                                                                                    | biological_process                                                                                                                                                                                                                              |
| RAB10, member RAS oncogene family                                     | Rab10     | NP_057885    | 23       | 4             | Golgi apparatus, membrane, plasma membrane                                                                                                                                              | GTP binding, nucleotide binding, protein binding                                                                                                                                                                                                    | intracellular protein transport, protein transport, small GTPase mediated signal transduction, transport                                                                                                                                        |

| Protein Name                                                      | Gene Name | Accession No | Mw (kDa) | Peptide Count | GO Component                                                                                                          | GO Function                                                                                                                                                    | GO Process                                                                                                                                                   |
|-------------------------------------------------------------------|-----------|--------------|----------|---------------|-----------------------------------------------------------------------------------------------------------------------|----------------------------------------------------------------------------------------------------------------------------------------------------------------|--------------------------------------------------------------------------------------------------------------------------------------------------------------|
| acyl-Coenzyme A dehydrogenase, very long chain                    | Acadvl    | NP_059062    | 71       | 4             | membrane, mitochondrial inner membrane, mitochondrion                                                                 | acyl-CoA dehydrogenase activity, electron carrier activity, FAD binding, oxidoreductase activity, oxidoreductase activity, acting on the CH-CH group of donors | fatty acid metabolic process, lipid metabolic process, metabolic process, oxidation reduction                                                                |
| caseinolytic protease, ATP-dependent, proteolytic subunit homolog | Clpp      | NP_059089    | 30       | 4             | mitochondrion                                                                                                         | ATP binding, hydrolase activity, nucleotide binding, peptidase activity, protein binding, serine-type endopeptidase activity, serine-type peptidase activity   | misfolded or incompletely synthesized protein catabolic process, proteolysis                                                                                 |
| USO1 homolog, vesicle docking protein                             | Uso1      | NP_062363    | 107      | 4             | cytoplasm, cytosol, Golgi apparatus, Golgi membrane, membrane, microsome, perinuclear region of cytoplasm             | binding, protein binding, protein transporter activity                                                                                                         | intracellular protein transport, protein transport, transport, vesicle fusion with Golgi apparatus, vesicle-mediated transport                               |
| SMC1 structural maintenance of chromosomes 1-like 1               | Smc1a     | NP_062684    | 143      | 4             | chromosome, nucleus                                                                                                   | ATP binding, nucleotide binding, protein binding                                                                                                               | cell cycle, cell division, chromosome organization, DNA repair, meiosis, mitosis, response to DNA damage stimulus                                            |
| proteolipid protein 2                                             | Plp2      | NP_062729    | 17       | 4             | integral to membrane, membrane                                                                                        | not classified                                                                                                                                                 | not classified                                                                                                                                               |
| mitochondrial carrier homolog 2                                   | Mtch2     | NP_062732    | 33       | 4             | integral to membrane, membrane, mitochondrial inner membrane, mitochondrion                                           | not classified                                                                                                                                                 | transport                                                                                                                                                    |
| destrin                                                           | Dstn      | NP_062745    | 19       | 4             | cortical actin cytoskeleton, cytoplasm, intracellular                                                                 | actin binding                                                                                                                                                  | cell motion, cytokinesis, positive regulation of actin filament depolymerization                                                                             |
| microsomal glutathione S-transferase 1                            | Mgst1     | NP_064330    | 18       | 4             | endoplasmic reticulum, membrane, microsome, mitochondrial inner membrane, mitochondrial outer membrane, mitochondrion | glutathione transferase activity, transferase activity                                                                                                         | glutathione metabolic process                                                                                                                                |
| Sec11-like 1                                                      | Sec11a    | NP_064335    | 21       | 4             | endoplasmic reticulum, integral to membrane, membrane, microsome                                                      | hydrolase activity, peptidase activity, serine-type peptidase activity                                                                                         | proteolysis, signal peptide processing                                                                                                                       |
| dihydroorotate dehydrogenase                                      | Dhodh     | NP_064430    | 43       | 4             | integral to membrane, membrane, mitochondrial inner membrane, mitochondrion                                           | catalytic activity, dihydroorotate dehydrogenase activity, dihydroorotate oxidase activity, oxidoreductase activity                                            | 'de novo' pyrimidine base biosynthetic process, metabolic process, oxidation reduction, pyrimidine nucleotide biosynthetic process, UMP biosynthetic process |
| RAB2A, member RAS oncogene family                                 | Rab2a     | NP_067493    | 24       | 4             | endoplasmic reticulum, Golgi apparatus, membrane                                                                      | GTP binding, nucleotide binding                                                                                                                                | intracellular protein transport, protein transport, small GTPase mediated signal transduction, transport, vesicle-mediated transport                         |
| ARP3 actin-related protein 3 homolog                              | Actr3     | NP_076224    | 47       | 4             | cell projection, cytoplasm, cytoskeleton, lamellipodium                                                               | actin binding, ATP binding, nucleotide binding, protein binding                                                                                                | regulation of actin filament polymerization                                                                                                                  |
| hydroxysteroid dehydrogenase like 2                               | Hsd12     | NP_077217    | 54       | 4             | mitochondrion                                                                                                         | binding, catalytic activity, oxidoreductase activity, sterol carrier activity                                                                                  | metabolic process, oxidation reduction                                                                                                                       |
| glyoxalase 1                                                      | Glo1      | NP_079650    | 21       | 4             | not classified                                                                                                        | lactoylglutathione lyase activity, lyase activity, metal ion binding, zinc ion binding                                                                         | not classified                                                                                                                                               |



| Protein Name                                              | Gene Name      | Accession No | Mw (kDa) | Peptide Count | GO Component                                                                                                                                                                                                                                        | GO Function                                                                                                           | GO Process                                                                                                                                                  |
|-----------------------------------------------------------|----------------|--------------|----------|---------------|-----------------------------------------------------------------------------------------------------------------------------------------------------------------------------------------------------------------------------------------------------|-----------------------------------------------------------------------------------------------------------------------|-------------------------------------------------------------------------------------------------------------------------------------------------------------|
| hypothetical protein LOC66302                             | 2410005O16 Rik | NP_079752    | 35       | 4             | cytoplasm, microtubule                                                                                                                                                                                                                              | binding                                                                                                               | not classified                                                                                                                                              |
| cytochrome c-1                                            | Cyc1           | NP_079843    | 35       | 4             | integral to membrane, membrane, mitochondrial inner membrane, mitochondrion, respiratory chain                                                                                                                                                      | electron carrier activity, heme binding, iron ion binding, metal ion binding                                          | electron transport chain, transport                                                                                                                         |
| ribosomal protein L15                                     | Rpl15          | NP_079862    | 24       | 4             | cellular_component, intracellular, ribonucleoprotein complex, ribosome                                                                                                                                                                              | molecular_function, structural constituent of ribosome                                                                | biological_process, translation                                                                                                                             |
| nipsnap homolog 3A                                        | Nipsnap3a      | NP_079899    | 28       | 4             | cytoplasm, mitochondrion                                                                                                                                                                                                                            | not classified                                                                                                        | not classified                                                                                                                                              |
| ribosomal protein S13                                     | Rps13          | NP_080809    | 17       | 4             | intracellular, ribonucleoprotein complex, ribosome                                                                                                                                                                                                  | structural constituent of ribosome                                                                                    | translation                                                                                                                                                 |
| NADH dehydrogenase (ubiquinone) 1 alpha subcomplex, 5     | Ndufa5         | NP_080890    | 13       | 4             | membrane, mitochondrial inner membrane, mitochondrion, respiratory chain                                                                                                                                                                            | oxidoreductase activity, acting on NADH or NADPH                                                                      | electron transport chain, respiratory electron transport chain, transport                                                                                   |
| 6.8 kDa mitochondrial proteolipid                         | 2010107E04 Rik | NP_081636    | 7        | 4             | mitochondrion                                                                                                                                                                                                                                       | not classified                                                                                                        | not classified                                                                                                                                              |
| brain protein 44                                          | Brp44          | NP_081706    | 14       | 4             | mitochondrion                                                                                                                                                                                                                                       | not classified                                                                                                        | not classified                                                                                                                                              |
| arginine-rich, mutated in early stage tumors              | Armet          | NP_083379    | 20       | 4             | extracellular region                                                                                                                                                                                                                                | growth factor activity                                                                                                | response to unfolded protein                                                                                                                                |
| abhydrolase domain containing 14b                         | Abhd14b        | NP_083907    | 22       | 4             | cytoplasm, nucleus                                                                                                                                                                                                                                  | hydrolase activity                                                                                                    | not classified                                                                                                                                              |
| ribosomal protein S9-like                                 | Rps9           | NP_084043    | 23       | 4             | intracellular, ribonucleoprotein complex, ribosome, small ribosomal subunit                                                                                                                                                                         | RNA binding, rRNA binding, structural constituent of ribosome                                                         | translation                                                                                                                                                 |
| keratin 82                                                | Krt82          | NP_444479    | 57       | 4             | intermediate filament, keratin filament                                                                                                                                                                                                             | structural molecule activity                                                                                          | not classified                                                                                                                                              |
| ATPase, H+ transporting, lysosomal V0 subunit A isoform 4 | Atp6v0a4       | NP_536715    | 96       | 4             | apical part of cell, apical plasma membrane, brush border, endosome, integral to membrane, membrane, plasma membrane, proton-transporting two-sector ATPase complex, proton-transporting domain, vacuolar proton-transporting V-type ATPase complex | hydrogen ion transmembrane transporter activity, hydrogen-exporting ATPase activity, phosphorylative mechanism        | ATP hydrolysis coupled proton transport, ATP synthesis coupled proton transport, ion transport, proton transport, transport                                 |
| acetyl-CoA synthetase 2-like                              | Acss1          | NP_542142    | 75       | 4             | mitochondrial matrix, mitochondrion                                                                                                                                                                                                                 | acetate-CoA ligase activity, AMP binding, ATP binding, catalytic activity, ligase activity, nucleotide binding        | acetyl-CoA biosynthetic process, metabolic process                                                                                                          |
| U5 snRNP-associated 102 kDa protein                       | Prpf6          | NP_598462    | 107      | 4             | intracellular, nucleus, spliceosomal complex                                                                                                                                                                                                        | androgen receptor binding, binding, transcription coactivator activity                                                | mRNA processing, nuclear mRNA splicing, via spliceosome, positive regulation of transcription from RNA polymerase II promoter, RNA processing, RNA splicing |
| eukaryotic translation initiation factor 3, subunit 9     | Eif3b          | NP_598677    | 91       | 4             | cytoplasm                                                                                                                                                                                                                                           | nucleic acid binding, nucleotide binding, RNA binding, translation initiation factor activity                         | translation, translational initiation                                                                                                                       |
| farnesyl diphosphate synthetase                           | Fdps           | NP_608219    | 41       | 4             | cytoplasm                                                                                                                                                                                                                                           | dimethylallyltransferase activity, geranyltransferase activity, transferase activity                                  | cholesterol biosynthetic process, isoprenoid biosynthetic process, lipid biosynthetic process, steroid biosynthetic process, sterol biosynthetic process    |
| protein phosphatase 2A, regulatory subunit B (PR 53)      | Ppp2r4         | NP_620087    | 37       | 4             | not classified                                                                                                                                                                                                                                      | phosphatase activator activity                                                                                        | not classified                                                                                                                                              |
| heterogeneous nuclear ribonucleoprotein L-like            | Hnrpl          | NP_659051    | 64       | 4             | nucleus, ribonucleoprotein complex                                                                                                                                                                                                                  | nucleic acid binding, nucleotide binding, oxidoreductase activity, peroxidase activity, RNA binding, selenium binding | mRNA processing, oxidation reduction                                                                                                                        |

| Protein Name                                                                   | Gene Name     | Accession No | Mw (kDa) | Peptide Count | GO Component                                                                                                   | GO Function                                                                                                                                        | GO Process                                                                                                            |
|--------------------------------------------------------------------------------|---------------|--------------|----------|---------------|----------------------------------------------------------------------------------------------------------------|----------------------------------------------------------------------------------------------------------------------------------------------------|-----------------------------------------------------------------------------------------------------------------------|
| propionyl-Coenzyme A carboxylase, alpha polypeptide                            | Pcca          | NP_659093    | 80       | 4             | mitochondrion                                                                                                  | ATP binding, biotin binding, catalytic activity, ligase activity, nucleotide binding, propionyl-CoA carboxylase activity                           | metabolic process                                                                                                     |
| RAS-related protein-1a                                                         | Rap1a         | NP_663516    | 21       | 4             | guanyl-nucleotide exchange factor complex, intracellular, membrane, plasma membrane                            | GTP binding, GTPase activity, nucleotide binding, protein binding, Ras GTPase binding                                                              | small GTPase mediated signal transduction                                                                             |
| serine proteinase inhibitor member 6C                                          | Serpin6c      | NP_683744    | 43       | 4             | not classified                                                                                                 | not classified                                                                                                                                     | not classified                                                                                                        |
| dynamin 1-like isoform a                                                       | Dnm1l         | NP_690029    | 80       | 4             | cytoplasm, membrane                                                                                            | GTP binding, GTPase activity, hydrolase activity, nucleotide binding                                                                               | not classified                                                                                                        |
| torsin A interacting protein 2                                                 | Tor1aip2      | NP_766431    | 54       | 4             | endoplasmic reticulum                                                                                          | protein binding                                                                                                                                    | not classified                                                                                                        |
| choline dehydrogenase                                                          | Chdh          | NP_780552    | 66       | 4             | mitochondrial inner membrane, mitochondrion                                                                    | choline dehydrogenase activity, FAD binding, molecular function, oxidoreductase activity, oxidoreductase activity, acting on CH-OH group of donors | alcohol metabolic process, biological process, glycine betaine biosynthetic process from choline, oxidation reduction |
| bleomycin hydrolase                                                            | Blmh          | NP_848760    | 53       | 4             | cytoplasm, soluble fraction                                                                                    | cysteine-type endopeptidase activity, cysteine-type peptidase activity, hydrolase activity, peptidase activity                                     | proteolysis, response to drug, response to toxin                                                                      |
| ATP synthase F0 subunit 8                                                      | ATP8          | NP_904332    | 8        | 4             | not classified                                                                                                 | not classified                                                                                                                                     | not classified                                                                                                        |
| PREDICTED: similar to ribosomal protein L28                                    | LOC100039731  | XP_001473974 | 16       | 4             | not classified                                                                                                 | not classified                                                                                                                                     | not classified                                                                                                        |
| PREDICTED: progesterone receptor membrane component 2 isoform 1                | Pgrmc2        | XP_130859    | 23       | 4             | cellular_component, integral to membrane, membrane                                                             | heme binding, lipid binding, protein binding, receptor activity, steroid binding                                                                   | biological_process                                                                                                    |
| PREDICTED: similar to Glyceraldehyde-3-phosphate dehydrogenase (GAPDH)         | EG433184      | XP_484732    | 36       | 4             | not classified                                                                                                 | not classified                                                                                                                                     | not classified                                                                                                        |
| PREDICTED: similar to NADH dehydrogenase (ubiquinone) 1, subcomplex unknown, 2 | LOC675851     | XP_990709    | 14       | 4             | not classified                                                                                                 | not classified                                                                                                                                     | not classified                                                                                                        |
| TAR DNA binding protein isoform 5                                              | Tardbp        | NP_001003898 | 34       | 3             | nucleus                                                                                                        | DNA binding, nucleic acid binding, nucleotide binding, RNA binding                                                                                 | mRNA processing, regulation of transcription, RNA splicing, transcription                                             |
| BCL2-associated transcription factor 1 isoform 3                               | Bclaf1        | NP_001020564 | 100      | 3             | cytoplasm, nucleus                                                                                             | DNA binding, protein binding, transcription repressor activity                                                                                     | negative regulation of transcription, positive regulation of apoptosis, regulation of transcription, transcription    |
| tetratricopeptide repeat domain 38                                             | Ttc38         | NP_001028509 | 52       | 3             | not classified                                                                                                 | binding                                                                                                                                            | not classified                                                                                                        |
| hypothetical protein LOC237880                                                 | 1700071K01Rik | NP_001028937 | 29       | 3             | not classified                                                                                                 | not classified                                                                                                                                     | not classified                                                                                                        |
| heterogeneous nuclear ribonucleoprotein A1 isoform b                           | Hnrnpa1       | NP_001034218 | 39       | 3             | cytoplasm, nucleus, ribonucleoprotein complex, spliceosomal complex                                            | nucleic acid binding, nucleotide binding, RNA binding                                                                                              | alternative nuclear mRNA splicing, via spliceosome, mRNA processing, mRNA transport, RNA splicing, transport          |
| zinc finger homeobox 2                                                         | Zfx2          | NP_001034287 | 273      | 3             | cellular_component, nucleus                                                                                    | DNA binding, metal ion binding, molecular function, zinc ion binding                                                                               | biological_process                                                                                                    |
| dynamin 2                                                                      | Dnm2          | NP_001034609 | 98       | 3             | cell junction, cytoplasm, cytoskeleton, membrane, microtubule, plasma membrane, postsynaptic membrane, synapse | GTP binding, GTPase activity, hydrolase activity, motor activity, nucleotide binding, protein binding                                              | endocytosis                                                                                                           |
| lipocalin 5 isoform b                                                          | Lcn5          | NP_001036095 | 20       | 3             | extracellular region, extracellular space                                                                      | binding, retinoid binding, transporter activity                                                                                                    | lipid metabolic process, retinoic acid metabolic process, transport                                                   |

| Protein Name                                                                     | Gene Name | Accession No | Mw (kDa) | Peptide Count | GO Component                                                                                                      | GO Function                                                                                                                                                                                                | GO Process                                                                                                                                                                                                                                                              |
|----------------------------------------------------------------------------------|-----------|--------------|----------|---------------|-------------------------------------------------------------------------------------------------------------------|------------------------------------------------------------------------------------------------------------------------------------------------------------------------------------------------------------|-------------------------------------------------------------------------------------------------------------------------------------------------------------------------------------------------------------------------------------------------------------------------|
| lysocardiolipin acyltransferase                                                  | Lycat     | NP_001074540 | 44       | 3             | endoplasmic reticulum, integral to membrane, membrane                                                             | 1-acylglycerol-3-phosphate O-acyltransferase activity, acyltransferase activity, transferase activity                                                                                                      | metabolic process, multicellular organismal development, phospholipid biosynthetic process                                                                                                                                                                              |
| oxoglutarate dehydrogenase-like                                                  | Ogdhl     | NP_001074599 | 117      | 3             | not classified                                                                                                    | not classified                                                                                                                                                                                             | not classified                                                                                                                                                                                                                                                          |
| myosin IA                                                                        | Myo1a     | NP_001074688 | 119      | 3             | apical plasma membrane, basal plasma membrane, brush border, lateral plasma membrane, microvillus, myosin complex | actin binding, ATP binding, calmodulin binding, motor activity, nucleotide binding                                                                                                                         | cell projection organization, microvillus assembly                                                                                                                                                                                                                      |
| transmembrane protein 103                                                        | Tmem103   | NP_001074850 | 29       | 3             | cellular_component                                                                                                | molecular_function                                                                                                                                                                                         | biological_process                                                                                                                                                                                                                                                      |
| small nuclear ribonucleoprotein N                                                | Snrpn     | NP_001076431 | 25       | 3             | nucleus, ribonucleoprotein complex                                                                                | nucleic acid binding, RNA binding                                                                                                                                                                          | not classified                                                                                                                                                                                                                                                          |
| Bcl-2 inhibitor of transcription isoform b                                       | Pthr2     | NP_001092280 | 20       | 3             | mitochondrion                                                                                                     | aminoacyl-tRNA hydrolase activity, hydrolase activity                                                                                                                                                      | translation                                                                                                                                                                                                                                                             |
| adducin 1 (alpha) isoform 3                                                      | Add1      | NP_001095914 | 73       | 3             | cytoplasm, cytoskeleton, membrane, plasma membrane                                                                | actin binding, calmodulin binding, metal ion binding, structural molecule activity                                                                                                                         | cell morphogenesis, cell volume homeostasis, erythrocyte differentiation, hemoglobin metabolic process, homeostasis of number of cells within a tissue, in utero embryonic development, multicellular organism growth                                                   |
| transcription factor E3 isoform b                                                | Tcfe3     | NP_001098666 | 58       | 3             | nucleus, transcription factor complex                                                                             | DNA binding, promoter binding, protein heterodimerization activity, transcription factor activity, transcription regulator activity                                                                        | humoral immune response, immune response, positive regulation of gene-specific transcription from RNA polymerase II promoter, positive regulation of transcription, DNA-dependent, regulation of osteoclast differentiation, regulation of transcription, transcription |
| Sjogren syndrome antigen B                                                       | Ssb       | NP_001103615 | 48       | 3             | nucleus, ribonucleoprotein complex                                                                                | nucleic acid binding, nucleotide binding, RNA binding                                                                                                                                                      | RNA processing                                                                                                                                                                                                                                                          |
| catechol-O-methyltransferase                                                     | Comt      | NP_001104533 | 29       | 3             | cytoplasm, integral to membrane, membrane, plasma membrane                                                        | catechol O-methyltransferase activity, magnesium ion binding, metal ion binding, methyltransferase activity, O-methyltransferase activity, transferase activity                                            | catecholamine metabolic process, dopamine catabolic process, neurotransmitter catabolic process                                                                                                                                                                         |
| neural precursor cell expressed, developmentally down-regulated gene 9 isoform 1 | Nedd9     | NP_001104794 | 93       | 3             | cytoplasm, cytoskeleton, nucleus                                                                                  | protein binding                                                                                                                                                                                            | cell adhesion, cell cycle, cell division, mitosis, regulation of growth                                                                                                                                                                                                 |
| acyl-Coenzyme A dehydrogenase, long-chain                                        | Acadl     | NP_031407    | 48       | 3             | mitochondrion                                                                                                     | acyl-CoA dehydrogenase activity, electron carrier activity, FAD binding, long chain-acyl-CoA dehydrogenase activity, oxidoreductase activity, oxidoreductase activity, acting on the CH-CH group of donors | fatty acid metabolic process, lipid metabolic process, metabolic process, oxidation reduction                                                                                                                                                                           |

| Protein Name                                                         | Gene Name | Accession No | Mw (kDa) | Peptide Count | GO Component                                                                                                                                                                                        | GO Function                                                                                                                                                                                                                                                                     | GO Process                                                                                                                                                                                                                                                                                                  |
|----------------------------------------------------------------------|-----------|--------------|----------|---------------|-----------------------------------------------------------------------------------------------------------------------------------------------------------------------------------------------------|---------------------------------------------------------------------------------------------------------------------------------------------------------------------------------------------------------------------------------------------------------------------------------|-------------------------------------------------------------------------------------------------------------------------------------------------------------------------------------------------------------------------------------------------------------------------------------------------------------|
| acyl-Coenzyme A dehydrogenase, medium chain                          | Acadm     | NP_031408    | 46       | 3             | mitochondrion                                                                                                                                                                                       | acyl-CoA dehydrogenase activity, electron carrier activity, FAD binding, oxidoreductase activity, oxidoreductase activity, acting on the CH-CH group of donors                                                                                                                  | cardiac muscle cell differentiation, carnitine metabolic process, fatty acid metabolic process, heart development, lipid metabolic process, liver development, metabolic process, organic acid metabolic process, oxidation reduction, post-embryonic development, response to cold, response to starvation |
| ATP synthase, H+ transporting, mitochondrial F1F0 complex, subunit e | Atp5k     | NP_031533    | 8        | 3             | membrane, mitochondrial inner membrane, mitochondrial proton-transporting ATP synthase complex, coupling factor F(o), mitochondrion, proton-transporting ATP synthase complex, coupling factor F(o) | hydrogen ion transmembrane transporter activity                                                                                                                                                                                                                                 | ATP biosynthetic process, ATP synthesis coupled proton transport, ion transport, proton transport, transport                                                                                                                                                                                                |
| complement component 1, q subcomponent binding protein               | C1qbp     | NP_031599    | 31       | 3             | mitochondrial matrix, mitochondrion                                                                                                                                                                 | protein binding                                                                                                                                                                                                                                                                 | not classified                                                                                                                                                                                                                                                                                              |
| cathepsin H                                                          | Ctsh      | NP_031827    | 37       | 3             | lysosome                                                                                                                                                                                            | cysteine-type endopeptidase activity, cysteine-type peptidase activity, hydrolase activity, peptidase activity                                                                                                                                                                  | proteolysis                                                                                                                                                                                                                                                                                                 |
| fibrillarin                                                          | Fbl       | NP_032017    | 34       | 3             | Cajal body, granular component, nucleolus, nucleus, ribonucleoprotein complex                                                                                                                       | methyltransferase activity, RNA binding, snoRNA binding, transferase activity                                                                                                                                                                                                   | rRNA processing, snoRNA metabolic process, tRNA processing                                                                                                                                                                                                                                                  |
| H1 histone family, member 0                                          | H1f0      | NP_032223    | 21       | 3             | chromosome, nucleosome, nucleus                                                                                                                                                                     | DNA binding                                                                                                                                                                                                                                                                     | nucleosome assembly                                                                                                                                                                                                                                                                                         |
| high mobility group box 3                                            | Hmgb3     | NP_032279    | 23       | 3             | chromosome, nucleus                                                                                                                                                                                 | DNA binding                                                                                                                                                                                                                                                                     | negative regulation of B cell differentiation, negative regulation of myeloid cell differentiation                                                                                                                                                                                                          |
| isocitrate dehydrogenase 3 (NAD+), gamma                             | ldh3g     | NP_032349    | 43       | 3             | mitochondrion                                                                                                                                                                                       | ATP binding, isocitrate dehydrogenase (NAD+) activity, magnesium ion binding, manganese ion binding, metal ion binding, NAD or NADH binding, nucleotide binding, oxidoreductase activity, oxidoreductase activity, acting on the CH-OH group of donors, NAD or NADP as acceptor | oxidation reduction, tricarboxylic acid cycle                                                                                                                                                                                                                                                               |
| integral membrane protein 1                                          | Stt3a     | NP_032434    | 81       | 3             | endoplasmic reticulum, integral to membrane, membrane, membrane fraction                                                                                                                            | dolichyl-diphosphooligosaccharide-protein glycotransferase activity, oligosaccharyl transferase activity, transferase activity                                                                                                                                                  | protein amino acid glycosylation                                                                                                                                                                                                                                                                            |
| integral membrane protein 2B                                         | Itm2b     | NP_032436    | 30       | 3             | Golgi apparatus, integral to membrane, membrane, membrane fraction                                                                                                                                  | ATP binding, protein binding                                                                                                                                                                                                                                                    | apoptosis, induction of apoptosis                                                                                                                                                                                                                                                                           |
| microtubule-associated protein 4                                     | Mtap4     | NP_032659    | 117      | 3             | microtubule                                                                                                                                                                                         | not classified                                                                                                                                                                                                                                                                  | negative regulation of microtubule depolymerization                                                                                                                                                                                                                                                         |
| NAD(P)H dehydrogenase, quinone 1                                     | Nqo1      | NP_032732    | 31       | 3             | cytoplasm                                                                                                                                                                                           | coenzyme binding, electron carrier activity, NAD(P)H dehydrogenase (quinone) activity, oxidoreductase activity                                                                                                                                                                  | negative regulation of catalytic activity, oxidation reduction, response to oxidative stress                                                                                                                                                                                                                |

| Protein Name                                     | Gene Name | Accession No | Mw (kDa) | Peptide Count | GO Component                                                                                                            | GO Function                                                                                                                                                                                                                                                          | GO Process                                                                                                                                                                                                                                                                                                                                                                                                     |
|--------------------------------------------------|-----------|--------------|----------|---------------|-------------------------------------------------------------------------------------------------------------------------|----------------------------------------------------------------------------------------------------------------------------------------------------------------------------------------------------------------------------------------------------------------------|----------------------------------------------------------------------------------------------------------------------------------------------------------------------------------------------------------------------------------------------------------------------------------------------------------------------------------------------------------------------------------------------------------------|
| nicotinamide nucleotide transhydrogenase         | Nnt       | NP_032736    | 114      | 3             | integral to membrane, membrane, mitochondrial inner membrane, mitochondrion                                             | binding, catalytic activity, electron carrier activity, NAD(P) transhydrogenase activity, NAD(P)+ transhydrogenase (AB-specific) activity, oxidoreductase activity                                                                                                   | metabolic process, oxidation reduction, proton transport                                                                                                                                                                                                                                                                                                                                                       |
| N-ethylmaleimide sensitive fusion protein        | Nsf       | NP_032766    | 83       | 3             | cytoplasm                                                                                                               | ATP binding, ATPase activity, coupled, ATP-dependent peptidase activity, hydrolase activity, magnesium ion binding, metal ion binding, nucleoside-triphosphatase activity, nucleotide binding, protein binding, serine-type endopeptidase activity, syntaxin binding | potassium ion transport, protein transport, proteolysis, transport                                                                                                                                                                                                                                                                                                                                             |
| outer dense fiber of sperm tails 1               | Odf1      | NP_032783    | 28       | 3             | outer dense fiber                                                                                                       | not classified                                                                                                                                                                                                                                                       | cell differentiation, multicellular organismal development, spermatogenesis                                                                                                                                                                                                                                                                                                                                    |
| pyruvate dehydrogenase E1 alpha 2                | Pdha2     | NP_032837    | 43       | 3             | intracellular membrane-bounded organelle, mitochondrion                                                                 | oxidoreductase activity, oxidoreductase activity, acting on the aldehyde or oxo group of donors, disulfide as acceptor, pyruvate dehydrogenase (acetyl-transferring) activity                                                                                        | glycolysis, metabolic process, oxidation reduction                                                                                                                                                                                                                                                                                                                                                             |
| protein kinase, cAMP dependent, catalytic, alpha | Prkaca    | NP_032880    | 41       | 3             | cytoplasm, cytosol, mitochondrion, neuromuscular junction, nucleoplasm, nucleus, plasma membrane                        | ATP binding, cAMP-dependent protein kinase activity, kinase activity, nucleotide binding, protein binding, protein kinase activity, protein serine/threonine kinase activity, transferase activity                                                                   | mesoderm formation, positive regulation of protein export from nucleus, protein amino acid autophosphorylation, protein amino acid phosphorylation, regulation of synaptic transmission                                                                                                                                                                                                                        |
| pinin                                            | Pnn       | NP_032917    | 83       | 3             | cell junction, cytoplasm, desmosome, nuclear speck, nucleus, spliceosomal complex                                       | DNA binding                                                                                                                                                                                                                                                          | cell-cell adhesion, mRNA processing, regulation of transcription, RNA splicing, transcription                                                                                                                                                                                                                                                                                                                  |
| periplakin                                       | Ppl       | NP_032935    | 204      | 3             | cell junction, cytoplasm, cytoskeleton, extrinsic to plasma membrane, membrane, mitochondrion, nucleus, plasma membrane | protein binding                                                                                                                                                                                                                                                      | keratinization                                                                                                                                                                                                                                                                                                                                                                                                 |
| ribosomal protein L30                            | Rpl30     | NP_033109    | 13       | 3             | cellular_component, intracellular, ribonucleoprotein complex, ribosome                                                  | molecular_function, structural constituent of ribosome                                                                                                                                                                                                               | biological_process, translation                                                                                                                                                                                                                                                                                                                                                                                |
| ribosomal protein S6                             | Rps6      | NP_033122    | 29       | 3             | cytoplasm, intracellular, perinuclear region of cytoplasm, polysome, ribonucleoprotein complex, ribosome                | structural constituent of ribosome                                                                                                                                                                                                                                   | activation-induced cell death of T cells, erythrocyte development, G1/S transition checkpoint, G1/S transition of mitotic cell cycle, gastrulation, glucose homeostasis, mitosis, negative regulation of apoptosis, oogenesis stage, placenta development, ribosomal small subunit biogenesis, rRNA processing, T cell differentiation in the thymus, T cell proliferation during immune response, translation |

| Protein Name                                                     | Gene Name | Accession No | Mw (kDa) | Peptide Count | GO Component                                                                                                                      | GO Function                                                                                                                                                                                                                           | GO Process                                                                                                                                                                                                                                                                                                                                                                                 |
|------------------------------------------------------------------|-----------|--------------|----------|---------------|-----------------------------------------------------------------------------------------------------------------------------------|---------------------------------------------------------------------------------------------------------------------------------------------------------------------------------------------------------------------------------------|--------------------------------------------------------------------------------------------------------------------------------------------------------------------------------------------------------------------------------------------------------------------------------------------------------------------------------------------------------------------------------------------|
| sodium channel, voltage-gated, type X, alpha                     | Scn10a    | NP_033160    | 220      | 3             | integral to membrane, membrane, voltage-gated sodium channel complex                                                              | ion channel activity, sodium channel activity, sodium ion binding, voltage-gated ion channel activity, voltage-gated sodium channel activity                                                                                          | ion transport, sodium ion transport, transport                                                                                                                                                                                                                                                                                                                                             |
| alcohol dehydrogenase 7 (class IV), mu or sigma polypeptide      | Adh7      | NP_033756    | 40       | 3             | cytoplasm, intracellular                                                                                                          | alcohol dehydrogenase (NAD) activity, metal ion binding, oxidoreductase activity, retinol dehydrogenase activity, zinc ion binding                                                                                                    | ethanol catabolic process, oxidation reduction, retinoic acid metabolic process, retinol metabolic process                                                                                                                                                                                                                                                                                 |
| acidic (leucine-rich) nuclear phosphoprotein 32 family, member A | Anp32a    | NP_033802    | 29       | 3             | cytoplasm, nuclear matrix, nucleus                                                                                                | protein binding                                                                                                                                                                                                                       | regulation of transcription, transcription                                                                                                                                                                                                                                                                                                                                                 |
| adaptor-related protein complex 3, beta 1 subunit                | Ap3b1     | NP_033810    | 123      | 3             | cytoplasmic vesicle, Golgi apparatus, membrane, membrane coat, trans-Golgi network                                                | binding, protein binding, protein transporter activity                                                                                                                                                                                | antigen processing and presentation, antigen processing and presentation, exogenous lipid antigen via MHC class Ib, blood coagulation, endocytosis, intracellular protein transport, positive regulation of NK T cell differentiation, protein targeting to lysosome, protein transport, transport, vesicle-mediated transport                                                             |
| Na <sup>+</sup> /K <sup>+</sup> -ATPase beta 1 subunit           | Atp1b1    | NP_033851    | 35       | 3             | basolateral plasma membrane, integral to membrane, membrane, plasma membrane                                                      | potassium ion binding, protein binding, sodium ion binding, sodium:potassium-exchanging ATPase activity                                                                                                                               | ATP biosynthetic process, ion transport, potassium ion transport, sodium ion transport, transport                                                                                                                                                                                                                                                                                          |
| D-dopachrome tautomerase                                         | Ddt       | NP_034157    | 13       | 3             | cytoplasm                                                                                                                         | D-dopachrome decarboxylase activity, lyase activity                                                                                                                                                                                   | melanin biosynthetic process                                                                                                                                                                                                                                                                                                                                                               |
| desmin                                                           | Des       | NP_034173    | 53       | 3             | contractile fiber, cytoplasm, cytoskeleton, insoluble fraction, intermediate filament, intracellular, sarcolemma, synapse, Z disc | protein binding, structural constituent of cytoskeleton, structural molecule activity                                                                                                                                                 | muscle organ development                                                                                                                                                                                                                                                                                                                                                                   |
| epoxide hydrolase 1, microsomal                                  | Ephx1     | NP_034275    | 53       | 3             | endoplasmic reticulum, integral to membrane, membrane, microsome                                                                  | catalytic activity, cis-stilbene-oxide hydrolase activity, epoxide hydrolase activity, hydrolase activity                                                                                                                             | aromatic compound catabolic process, cellular aromatic compound metabolic process, response to organic cyclic substance, response to toxin                                                                                                                                                                                                                                                 |
| hexosaminidase A                                                 | Hexa      | NP_034551    | 61       | 3             | lysosome, membrane                                                                                                                | beta-N-acetylhexosaminidase activity, catalytic activity, cation binding, hydrolase activity, hydrolase activity, acting on glycosyl bonds, hydrolase activity, hydrolyzing O-glycosyl compounds, protein heterodimerization activity | adult walking behavior, carbohydrate metabolic process, ganglioside catabolic process, glycosaminoglycan metabolic process, lipid storage, locomotory behavior, lysosome organization, metabolic process, myelination, neuromuscular process controlling balance, neuromuscular process controlling posture, sensory perception of sound, sexual reproduction, skeletal system development |

| Protein Name                                          | Gene Name | Accession No | Mw (kDa) | Peptide Count | GO Component                                                             | GO Function                                                                                                                                                                            | GO Process                                                                                                                                           |
|-------------------------------------------------------|-----------|--------------|----------|---------------|--------------------------------------------------------------------------|----------------------------------------------------------------------------------------------------------------------------------------------------------------------------------------|------------------------------------------------------------------------------------------------------------------------------------------------------|
| hexokinase 1                                          | Hk1       | NP_034568    | 106      | 3             | cytosol, membrane, mitochondrial outer membrane, mitochondrion           | ATP binding, hexokinase activity, kinase activity, nucleotide binding, phosphotransferase activity, alcohol group as acceptor, transferase activity                                    | carbohydrate metabolic process, glycolysis                                                                                                           |
| keratin 86                                            | Krt86     | NP_034797    | 53       | 3             | intermediate filament, keratin filament                                  | structural molecule activity                                                                                                                                                           | not classified                                                                                                                                       |
| NADH dehydrogenase (ubiquinone) 1 alpha subcomplex, 4 | Ndufa4    | NP_035016    | 9        | 3             | membrane, mitochondrial inner membrane, mitochondrion, respiratory chain | not classified                                                                                                                                                                         | electron transport chain, transport                                                                                                                  |
| proteasome (prosome, macropain) 28 subunit, alpha     | Psme1     | NP_035319    | 29       | 3             | proteasome activator complex, proteasome complex                         | proteasome activator activity, protein binding                                                                                                                                         | antigen processing and presentation of exogenous antigen                                                                                             |
| purine rich element binding protein B                 | Purb      | NP_035351    | 34       | 3             | DNA replication factor A complex, nucleus                                | DNA binding, double-stranded DNA binding, mRNA binding, protein binding, single-stranded DNA binding, SMAD binding, transcription factor activity, transcription factor binding        | apoptosis, cell differentiation, cell proliferation, negative regulation of transcription, DNA-dependent, regulation of transcription, transcription |
| muscle glycogen phosphorylase                         | Pygm      | NP_035354    | 97       | 3             | Z disc                                                                   | glycogen phosphorylase activity, nucleotide binding, phosphorylase activity, pyridoxal phosphate binding, transferase activity, transferase activity, transferring glycosyl groups     | carbohydrate metabolic process, glycogen catabolic process, glycogen metabolic process                                                               |
| retinol binding protein 1, cellular                   | Rbp1      | NP_035384    | 16       | 3             | cytoplasm                                                                | binding, lipid binding, retinal binding, retinoid binding, retinol binding, transporter activity                                                                                       | retinoic acid metabolic process, retinol metabolic process, transport                                                                                |
| WD repeat domain 1                                    | Wdr1      | NP_035845    | 66       | 3             | actin cytoskeleton, cytoplasm, cytoskeleton                              | actin binding                                                                                                                                                                          | sensory perception of sound                                                                                                                          |
| bisphosphate 3'-nucleotidase 1                        | Bpnt1     | NP_035924    | 33       | 3             | not classified                                                           | 3'(2'),5'-bisphosphate nucleotidase activity, hydrolase activity, inositol or phosphatidylinositol phosphatase activity, lithium ion binding, magnesium ion binding, metal ion binding | not classified                                                                                                                                       |
| proteasome (prosome, macropain) subunit, alpha type 1 | Psma1     | NP_036095    | 30       | 3             | cytoplasm, nucleus, proteasome complex, proteasome core complex          | endopeptidase activity, hydrolase activity, peptidase activity, protein binding, threonine-type endopeptidase activity                                                                 | proteolysis involved in cellular protein catabolic process, ubiquitin-dependent protein catabolic process                                            |
| proteasome (prosome, macropain) subunit, alpha type 6 | Psma6     | NP_036098    | 27       | 3             | cytoplasm, nucleus, proteasome complex, proteasome core complex          | endopeptidase activity, hydrolase activity, peptidase activity, threonine-type endopeptidase activity                                                                                  | proteolysis involved in cellular protein catabolic process, ubiquitin-dependent protein catabolic process                                            |
| acyl-CoA thioesterase 1                               | Acot1     | NP_036136    | 46       | 3             | cytoplasm                                                                | acyl-CoA thioesterase activity, carboxylesterase activity, hydrolase activity, palmitoyl-CoA hydrolase activity, thioester hydrolase activity                                          | acyl-CoA metabolic process, lipid metabolic process, long-chain fatty acid metabolic process                                                         |
| annexin A11                                           | Anxa11    | NP_038497    | 54       | 3             | nucleus                                                                  | calcium ion binding, calcium-dependent phospholipid binding, phosphatidylethanolamine binding                                                                                          | not classified                                                                                                                                       |
| guanine nucleotide-binding protein, beta-4 subunit    | Gnb4      | NP_038559    | 37       | 3             | heterotrimeric G-protein complex                                         | GTPase activity, signal transducer activity                                                                                                                                            | G-protein coupled receptor protein signaling pathway, signal transduction                                                                            |

| Protein Name                                                                           | Gene Name | Accession No | Mw (kDa) | Peptide Count | GO Component                                                                                                                                                                                                                                                | GO Function                                                                                                                                                                                 | GO Process                                                                                                                                                                                   |
|----------------------------------------------------------------------------------------|-----------|--------------|----------|---------------|-------------------------------------------------------------------------------------------------------------------------------------------------------------------------------------------------------------------------------------------------------------|---------------------------------------------------------------------------------------------------------------------------------------------------------------------------------------------|----------------------------------------------------------------------------------------------------------------------------------------------------------------------------------------------|
| splicing factor, arginine/serine-rich 3 (SRp20)                                        | Sfrs3     | NP_038691    | 19       | 3             | nucleus                                                                                                                                                                                                                                                     | nucleic acid binding, nucleotide binding, RNA binding                                                                                                                                       | mRNA processing, RNA splicing                                                                                                                                                                |
| ras-GTPase-activating protein SH3-domain binding protein                               | G3bp1     | NP_038744    | 52       | 3             | cytoplasm, intracellular, membrane, nucleus, plasma membrane                                                                                                                                                                                                | ATP binding, DNA binding, endonuclease activity, helicase activity, hydrolase activity, nuclease activity, nucleic acid binding, nucleotide binding, RNA binding                            | transport                                                                                                                                                                                    |
| ribosomal protein S11                                                                  | Rps11     | NP_038753    | 18       | 3             | intracellular, ribonucleoprotein complex, ribosome                                                                                                                                                                                                          | RNA binding, rRNA binding, structural constituent of ribosome                                                                                                                               | translation                                                                                                                                                                                  |
| solute carrier family 25 (mitochondrial carrier, dicarboxylate transporter), member 10 | Slc25a10  | NP_038798    | 32       | 3             | integral to membrane, membrane, mitochondrial inner membrane, mitochondrion                                                                                                                                                                                 | binding, secondary active transmembrane transporter activity                                                                                                                                | mitochondrial transport, transport                                                                                                                                                           |
| ATP synthase, H <sup>+</sup> transporting, mitochondrial F0 complex, subunit G         | Atp5i     | NP_038823    | 11       | 3             | membrane, mitochondrial inner membrane, mitochondrial proton-transporting ATP synthase complex, mitochondrial proton-transporting ATP synthase complex, coupling factor F(o), mitochondrion, proton-transporting ATP synthase complex, coupling factor F(o) | hydrogen ion transmembrane transporter activity, hydrogen-exporting ATPase activity, phosphorylative mechanism                                                                              | ATP biosynthetic process, ATP synthesis coupled proton transport, ion transport, proton transport, transport                                                                                 |
| FK506 binding protein 3                                                                | Fkbp3     | NP_038930    | 25       | 3             | nucleus                                                                                                                                                                                                                                                     | isomerase activity, peptidyl-prolyl cis-trans isomerase activity                                                                                                                            | protein folding                                                                                                                                                                              |
| UDP-N-acetyl-alpha-D-galactosamine:polypeptide N-acetylgalactosaminyltransferase 3     | Galnt3    | NP_056551    | 73       | 3             | Golgi apparatus, integral to membrane, membrane                                                                                                                                                                                                             | calcium ion binding, manganese ion binding, polypeptide N-acetylgalactosaminyltransferase activity, sugar binding, transferase activity, transferase activity, transferring glycosyl groups | not classified                                                                                                                                                                               |
| ERO1-like                                                                              | Ero1l     | NP_056589    | 54       | 3             | endoplasmic reticulum, endoplasmic reticulum membrane, integral to endoplasmic reticulum membrane, membrane                                                                                                                                                 | electron carrier activity, FAD binding, oxidoreductase activity, oxidoreductase activity, acting on sulfur group of donors, disulfide as acceptor, protein binding                          | brown fat cell differentiation, electron transport chain, endoplasmic reticulum unfolded protein response, oxidation reduction, protein folding, protein thiol-disulfide exchange, transport |
| heterogeneous nuclear ribonucleoprotein D-like                                         | Hnrpd     | NP_057899    | 46       | 3             | cytoplasm, nucleus                                                                                                                                                                                                                                          | DNA binding, nucleic acid binding, nucleotide binding, RNA binding                                                                                                                          | mRNA metabolic process, regulation of transcription, transcription                                                                                                                           |
| AU RNA-binding enoyl-coenzyme A hydratase                                              | Auh       | NP_057918    | 33       | 3             | mitochondrion                                                                                                                                                                                                                                               | catalytic activity, enoyl-CoA hydratase activity, lyase activity, methylglutaconyl-CoA hydratase activity, RNA binding                                                                      | branched chain family amino acid catabolic process, metabolic process, nuclear-transcribed mRNA catabolic process, deadenylation-dependent decay                                             |
| enoyl coenzyme A hydratase 1, peroxisomal                                              | Ech1      | NP_058052    | 36       | 3             | mitochondrion, peroxisome                                                                                                                                                                                                                                   | catalytic activity, isomerase activity                                                                                                                                                      | fatty acid metabolic process, lipid metabolic process, metabolic process                                                                                                                     |
| ribosomal protein L5                                                                   | Rpl5      | NP_058676    | 34       | 3             | cytoplasm, intracellular, nucleus, ribonucleoprotein complex, ribosome                                                                                                                                                                                      | 5S rRNA binding, protein binding, RNA binding, rRNA binding, structural constituent of ribosome                                                                                             | biological_process, translation                                                                                                                                                              |
| ribosomal protein L36                                                                  | Rpl36     | NP_061200    | 12       | 3             | cellular_component, intracellular, ribonucleoprotein complex, ribosome                                                                                                                                                                                      | molecular_function, structural constituent of ribosome                                                                                                                                      | biological_process, translation                                                                                                                                                              |



| Protein Name                                                   | Gene Name | Accession No | Mw (kDa) | Peptide Count | GO Component                                                                                                      | GO Function                                                                                                                                                                                                                                                               | GO Process                                                                                                                                   |
|----------------------------------------------------------------|-----------|--------------|----------|---------------|-------------------------------------------------------------------------------------------------------------------|---------------------------------------------------------------------------------------------------------------------------------------------------------------------------------------------------------------------------------------------------------------------------|----------------------------------------------------------------------------------------------------------------------------------------------|
| ribosomal protein, large, P1                                   | Rplp1     | NP_061341    | 11       | 3             | cellular_component, intracellular, ribonucleoprotein complex, ribosome                                            | molecular_function, structural constituent of ribosome                                                                                                                                                                                                                    | biological_process, translational elongation                                                                                                 |
| protein phosphatase 2a, catalytic subunit, alpha isoform       | Ppp2ca    | NP_062284    | 36       | 3             | chromosome, centromeric region, cytoplasm, cytosol, nucleus, plasma membrane, protein phosphatase type 2A complex | hydrolase activity, iron ion binding, manganese ion binding, metal ion binding, phosphoprotein phosphatase activity, protein binding, protein serine/threonine phosphatase activity                                                                                       | mesoderm development, protein amino acid dephosphorylation, regulation of cell cycle                                                         |
| HLA-B-associated transcript 1A                                 | Bat1a     | NP_062667    | 49       | 3             | nucleus, spliceosomal complex                                                                                     | ATP binding, ATP-dependent helicase activity, helicase activity, hydrolase activity, nucleic acid binding, nucleotide binding, RNA binding                                                                                                                                | mRNA processing, RNA splicing                                                                                                                |
| cytochrome P450, family 51                                     | Cyp51     | NP_064394    | 57       | 3             | endoplasmic reticulum, integral to membrane, membrane, microsome                                                  | electron carrier activity, heme binding, iron ion binding, metal ion binding, monooxygenase activity, oxidoreductase activity, sterol 14-demethylase activity                                                                                                             | cholesterol biosynthetic process, lipid biosynthetic process, oxidation reduction, steroid biosynthetic process, sterol biosynthetic process |
| cell line NK14 derived transforming oncogene                   | Rab8a     | NP_075615    | 24       | 3             | membrane, plasma membrane                                                                                         | GTP binding, nucleotide binding, protein binding                                                                                                                                                                                                                          | protein transport, small GTPase mediated signal transduction, transport                                                                      |
| NADH dehydrogenase (ubiquinone) 1 alpha subcomplex, 7 (B14.5a) | Ndufa7    | NP_075691    | 13       | 3             | membrane, mitochondrial inner membrane, mitochondrion, respiratory chain                                          | NADH dehydrogenase (ubiquinone) activity                                                                                                                                                                                                                                  | ATP synthesis coupled electron transport, electron transport chain, transport                                                                |
| upregulated during skeletal muscle growth 5                    | Usmg5     | NP_075700    | 6        | 3             | integral to membrane, membrane, mitochondrial inner membrane, mitochondrion                                       | not classified                                                                                                                                                                                                                                                            | not classified                                                                                                                               |
| succinate dehydrogenase complex, subunit B, iron sulfur (lp)   | Sdhb      | NP_075863    | 32       | 3             | membrane, mitochondrial inner membrane, mitochondrion                                                             | 2 iron, 2 sulfur cluster binding, 3 iron, 4 sulfur cluster binding, 4 iron, 4 sulfur cluster binding, electron carrier activity, iron ion binding, iron-sulfur cluster binding, metal ion binding, oxidoreductase activity, succinate dehydrogenase (ubiquinone) activity | electron transport chain, oxidation reduction, transport, tricarboxylic acid cycle                                                           |
| SET translocation                                              | Set       | NP_076360    | 33       | 3             | cytoplasm, endoplasmic reticulum, nucleus                                                                         | not classified                                                                                                                                                                                                                                                            | nucleosome assembly                                                                                                                          |
| ribosomal protein S23                                          | Rps23     | NP_077137    | 16       | 3             | intracellular, ribonucleoprotein complex, ribosome, small ribosomal subunit                                       | structural constituent of ribosome                                                                                                                                                                                                                                        | translation                                                                                                                                  |
| haloacid dehalogenase-like hydrolase domain containing 3       | Hdhd3     | NP_077219    | 28       | 3             | mitochondrion                                                                                                     | catalytic activity, hydrolase activity, phosphoglycolate phosphatase activity                                                                                                                                                                                             | metabolic process                                                                                                                            |
| tetratricopeptide repeat domain 11                             | Fis1      | NP_079838    | 17       | 3             | integral to membrane, membrane, mitochondrial outer membrane, mitochondrion, peroxisome                           | binding                                                                                                                                                                                                                                                                   | apoptosis                                                                                                                                    |

| Protein Name                                                                           | Gene Name | Accession No | Mw (kDa) | Peptide Count | GO Component                                                                                                         | GO Function                                                                                                                                                                                                                                                                      | GO Process                                                                                                                                                                          |
|----------------------------------------------------------------------------------------|-----------|--------------|----------|---------------|----------------------------------------------------------------------------------------------------------------------|----------------------------------------------------------------------------------------------------------------------------------------------------------------------------------------------------------------------------------------------------------------------------------|-------------------------------------------------------------------------------------------------------------------------------------------------------------------------------------|
| ubiquinol-cytochrome c reductase, Rieske iron-sulfur polypeptide 1                     | Uqcrfs1   | NP_079986    | 29       | 3             | integral to membrane, membrane, mitochondrial inner membrane, mitochondrion, respiratory chain                       | 2 iron, 2 sulfur cluster binding, electron carrier activity, iron ion binding, iron-sulfur cluster binding, metal ion binding, oxidoreductase activity, oxidoreductase activity, acting on diphenols and related substances as donors, ubiquinol-cytochrome-c reductase activity | electron transport chain, oxidation reduction, transport                                                                                                                            |
| ADP-ribosylation factor-like 1                                                         | Arl1      | NP_080135    | 20       | 3             | cytoplasm, Golgi apparatus, intracellular, membrane                                                                  | GTP binding, magnesium ion binding, metal ion binding, nucleotide binding                                                                                                                                                                                                        | small GTPase mediated signal transduction                                                                                                                                           |
| signal sequence receptor, alpha                                                        | Ssr1      | NP_080241    | 32       | 3             | endoplasmic reticulum, integral to membrane, membrane                                                                | calcium ion binding                                                                                                                                                                                                                                                              | not classified                                                                                                                                                                      |
| ribosomal protein S20                                                                  | Rps20     | NP_080423    | 13       | 3             | intracellular, ribonucleoprotein complex, ribosome, small ribosomal subunit                                          | RNA binding, structural constituent of ribosome                                                                                                                                                                                                                                  | translation                                                                                                                                                                         |
| ubiquinol-cytochrome c reductase binding protein                                       | Uqcrb     | NP_080495    | 14       | 3             | membrane, mitochondrial inner membrane, mitochondrion, respiratory chain                                             | ubiquinol-cytochrome-c reductase activity                                                                                                                                                                                                                                        | electron transport chain, mitochondrial electron transport, ubiquinol to cytochrome c, transport                                                                                    |
| diacetyl/L-xylulose reductase                                                          | Dcxr      | NP_080704    | 26       | 3             | brush border, membrane, microvillus, plasma membrane                                                                 | binding, catalytic activity, L-xylulose reductase (NADP+) activity, oxidoreductase activity, oxidoreductase activity, acting on CH-OH group of donors, protein binding                                                                                                           | carbohydrate metabolic process, D-xylulose metabolic process, glucose metabolic process, metabolic process, NADP metabolic process, oxidation reduction, xylulose metabolic process |
| arginine/serine-rich splicing factor 6                                                 | Sfrs6     | NP_080775    | 39       | 3             | not classified                                                                                                       | not classified                                                                                                                                                                                                                                                                   | not classified                                                                                                                                                                      |
| actin related protein 2/3 complex, subunit 4                                           | Arpc4     | NP_080828    | 20       | 3             | Arp2/3 protein complex, cell projection, cytoplasm, cytoskeleton                                                     | actin binding, molecular_function                                                                                                                                                                                                                                                | actin filament polymerization, biological_process                                                                                                                                   |
| apolipoprotein O-like                                                                  | Apool     | NP_080841    | 29       | 3             | extracellular region, mitochondrial inner membrane, mitochondrion                                                    | not classified                                                                                                                                                                                                                                                                   | not classified                                                                                                                                                                      |
| CDP-diacylglycerol--inositol 3-phosphatidyltransferase (phosphatidylinositol synthase) | Cdipt     | NP_080914    | 24       | 3             | endoplasmic reticulum, Golgi apparatus, integral to membrane, membrane, plasma membrane                              | CDP-diacylglycerol-inositol 3-phosphatidyltransferase activity, manganese ion binding, phosphotransferase activity, for other substituted phosphate groups, transferase activity                                                                                                 | phospholipid biosynthetic process                                                                                                                                                   |
| epsin                                                                                  | Serpina1f | NP_080963    | 46       | 3             | extracellular region                                                                                                 | peptidase inhibitor activity, serine-type endopeptidase inhibitor activity                                                                                                                                                                                                       | not classified                                                                                                                                                                      |
| lectin, mannose-binding, 1                                                             | Lman1     | NP_081676    | 58       | 3             | endoplasmic reticulum, ER-Golgi intermediate compartment, Golgi apparatus, integral to membrane, membrane, sarcomere | sugar binding                                                                                                                                                                                                                                                                    | ER to Golgi vesicle-mediated transport, protein transport, transport, vesicle-mediated transport                                                                                    |
| katanin p60 subunit A-like 2                                                           | Katnal2   | NP_081997    | 46       | 3             | microtubule                                                                                                          | ATP binding, hydrolase activity, microtubule-severing ATPase activity, nucleotide binding                                                                                                                                                                                        | not classified                                                                                                                                                                      |
| solute carrier family 25, member 35                                                    | Slc25a35  | NP_082324    | 33       | 3             | integral to membrane, membrane, mitochondrial inner membrane, mitochondrion                                          | not classified                                                                                                                                                                                                                                                                   | transport                                                                                                                                                                           |
| protein disulfide isomerase associated 5                                               | Pdia5     | NP_082571    | 59       | 3             | endoplasmic reticulum                                                                                                | isomerase activity, protein disulfide isomerase activity                                                                                                                                                                                                                         | cell redox homeostasis, response to stress                                                                                                                                          |

| Protein Name                                                                    | Gene Name      | Accession No | Mw (kDa) | Peptide Count | GO Component                                                                                     | GO Function                                                                                                                                                                                                                                                           | GO Process                                                                                                      |
|---------------------------------------------------------------------------------|----------------|--------------|----------|---------------|--------------------------------------------------------------------------------------------------|-----------------------------------------------------------------------------------------------------------------------------------------------------------------------------------------------------------------------------------------------------------------------|-----------------------------------------------------------------------------------------------------------------|
| N-acetylneuraminate pyruvate lyase                                              | Npl            | NP_083025    | 35       | 3             | cellular_component, cytoplasm                                                                    | catalytic activity, lyase activity, N-acetylneuraminate lyase activity                                                                                                                                                                                                | biological_process, carbohydrate metabolic process, metabolic process                                           |
| mitochondrial phosphoenolpyruvate carboxykinase 2                               | Pck2           | NP_083270    | 73       | 3             | mitochondrion                                                                                    | carboxy-lyase activity, GTP binding, lyase activity, manganese ion binding, metal ion binding, nucleotide binding, phosphoenolpyruvate carboxykinase (GTP) activity, phosphoenolpyruvate carboxykinase activity, purine nucleotide binding                            | gluconeogenesis                                                                                                 |
| NADH dehydrogenase (ubiquinone) Fe-S protein 7                                  | Ndufs7         | NP_083548    | 25       | 3             | mitochondrial inner membrane, mitochondrion, respiratory chain                                   | 4 iron, 4 sulfur cluster binding, iron ion binding, iron-sulfur cluster binding, metal ion binding, NADH dehydrogenase (ubiquinone) activity, NADH dehydrogenase activity, oxidoreductase activity, oxidoreductase activity, acting on NADH or NADPH, quinone binding | biological_process, electron transport chain, oxidation reduction, transport                                    |
| Sec1 family domain containing 1                                                 | Scfd1          | NP_084101    | 72       | 3             | cellular_component, cytoplasm, endoplasmic reticulum, Golgi apparatus, membrane                  | molecular_function                                                                                                                                                                                                                                                    | biological_process, protein transport, transport, vesicle docking during exocytosis, vesicle-mediated transport |
| dihydrolipoamide S-succinyltransferase (E2 component of 2-oxoglutarate complex) | Dlst           | NP_084501    | 49       | 3             | mitochondrion, oxoglutarate dehydrogenase complex                                                | acyltransferase activity, dihydrolipoalysine-residue succinyltransferase activity, lipoic acid binding, transferase activity                                                                                                                                          | metabolic process, tricarboxylic acid cycle                                                                     |
| ribosomal protein 10                                                            | Rpl10          | NP_443067    | 25       | 3             | cytoplasm, cytosolic large ribosomal subunit, intracellular, ribonucleoprotein complex, ribosome | structural constituent of ribosome                                                                                                                                                                                                                                    | translation                                                                                                     |
| isocitrate dehydrogenase 3, beta subunit                                        | Idh3b          | NP_570954    | 42       | 3             | mitochondrion                                                                                    | oxidoreductase activity                                                                                                                                                                                                                                               | oxidation reduction                                                                                             |
| acidic nuclear phosphoprotein 32 family, member B                               | Anp32b         | NP_570959    | 31       | 3             | nucleus                                                                                          | molecular_function, protein binding                                                                                                                                                                                                                                   | S phase of mitotic cell cycle                                                                                   |
| acyl-Coenzyme A binding domain containing 3                                     | Acbd3          | NP_573488    | 60       | 3             | Golgi apparatus, membrane, mitochondrion                                                         | acyl-CoA binding, binding                                                                                                                                                                                                                                             | lipid biosynthetic process, steroid biosynthetic process                                                        |
| hypothetical protein LOC70984                                                   | 4931406C07 Rik | NP_598493    | 35       | 3             | nucleus                                                                                          | hydrolase activity, hydrolase activity, acting on ester bonds, metal ion binding, zinc ion binding                                                                                                                                                                    | not classified                                                                                                  |
| phosphoserine phosphatase                                                       | Psph           | NP_598661    | 25       | 3             | cellular_component                                                                               | catalytic activity, hydrolase activity, magnesium ion binding, molecular_function, phosphatase activity, phosphoserine phosphatase activity                                                                                                                           | biological_process, cellular amino acid biosynthetic process, L-serine biosynthetic process, metabolic process  |
| splicing factor 3b, subunit 3                                                   | Sf3b3          | NP_598714    | 136      | 3             | nucleus, spliceosomal complex                                                                    | nucleic acid binding                                                                                                                                                                                                                                                  | mRNA processing, RNA splicing                                                                                   |
| transmembrane emp24 protein transport domain containing 4                       | Tmed4          | NP_598781    | 26       | 3             | endoplasmic reticulum, integral to membrane, membrane                                            | not classified                                                                                                                                                                                                                                                        | transport                                                                                                       |
| DEAD (Asp-Glu-Ala-Asp) box polypeptide 1                                        | Ddx1           | NP_598801    | 83       | 3             | ribonucleoprotein complex                                                                        | ATP binding, ATP-dependent helicase activity, helicase activity, hydrolase activity, molecular_function, nucleic acid binding, nucleotide binding, RNA binding                                                                                                        | biological_process                                                                                              |

| Protein Name                                                                      | Gene Name | Accession No | Mw (kDa) | Peptide Count | GO Component                                                                | GO Function                                                                                                                                                                                                                                                                     | GO Process                                                                                                                                                                                                                                                                                                                                                                                                                    |
|-----------------------------------------------------------------------------------|-----------|--------------|----------|---------------|-----------------------------------------------------------------------------|---------------------------------------------------------------------------------------------------------------------------------------------------------------------------------------------------------------------------------------------------------------------------------|-------------------------------------------------------------------------------------------------------------------------------------------------------------------------------------------------------------------------------------------------------------------------------------------------------------------------------------------------------------------------------------------------------------------------------|
| otubain 1                                                                         | Otub1     | NP_598911    | 31       | 3             | not classified                                                              | cysteine-type peptidase activity, hydrolase activity, peptidase activity                                                                                                                                                                                                        | immune response, modification-dependent protein catabolic process                                                                                                                                                                                                                                                                                                                                                             |
| NADH dehydrogenase (ubiquinone) Fe-S protein 8                                    | Ndufs8    | NP_659119    | 24       | 3             | membrane, mitochondrion, respiratory chain                                  | 4 iron, 4 sulfur cluster binding, electron carrier activity, iron ion binding, iron-sulfur cluster binding, metal ion binding, NADH dehydrogenase (ubiquinone) activity, NADH dehydrogenase activity, oxidoreductase activity, oxidoreductase activity, acting on NADH or NADPH | electron transport chain, oxidation reduction, transport                                                                                                                                                                                                                                                                                                                                                                      |
| ribonuclease/angiogenin inhibitor 1                                               | Rnh1      | NP_660117    | 50       | 3             | cytoplasm                                                                   | protein binding                                                                                                                                                                                                                                                                 | not classified                                                                                                                                                                                                                                                                                                                                                                                                                |
| thioredoxin domain containing 5                                                   | Txndc5    | NP_663342    | 46       | 3             | endoplasmic reticulum, endoplasmic reticulum lumen                          | isomerase activity                                                                                                                                                                                                                                                              | cell redox homeostasis                                                                                                                                                                                                                                                                                                                                                                                                        |
| solute carrier family 25, member 1                                                | Slc25a1   | NP_694790    | 34       | 3             | integral to membrane, membrane, mitochondrial inner membrane, mitochondrion | not classified                                                                                                                                                                                                                                                                  | transport                                                                                                                                                                                                                                                                                                                                                                                                                     |
| pyrroline-5-carboxylate synthetase isoform 2                                      | Aldh18a1  | NP_705782    | 87       | 3             | cytoplasm, membrane, mitochondrial inner membrane, mitochondrion            | ATP binding, catalytic activity, glutamate 5-kinase activity, glutamate-5-semialdehyde dehydrogenase activity, kinase activity, nucleotide binding, oxidoreductase activity, transferase activity                                                                               | cellular amino acid biosynthetic process, metabolic process, oxidation reduction, proline biosynthetic process                                                                                                                                                                                                                                                                                                                |
| ciliary rootlet coiled-coil, rootletin                                            | Crocc     | NP_742120    | 227      | 3             | centriole, ciliary rootlet                                                  | kinesin binding, structural molecule activity                                                                                                                                                                                                                                   | cell cycle, cell projection organization                                                                                                                                                                                                                                                                                                                                                                                      |
| phospholipase C, gamma 2                                                          | Plcg2     | NP_758489    | 148      | 3             | not classified                                                              | calcium ion binding, hydrolase activity, phosphoinositide phospholipase C activity, phospholipase C activity, phosphoric diester hydrolase activity, protein binding, signal transducer activity                                                                                | activation of store-operated calcium channel activity, follicular B cell differentiation, inositol trisphosphate biosynthetic process, intracellular signaling cascade, lipid catabolic process, lipid metabolic process, negative regulation of programmed cell death, phospholipid catabolic process, regulation of gene expression, response to lipopolysaccharide, signal transduction, T cell receptor signaling pathway |
| cytoskeleton-associated protein 4                                                 | Ckap4     | NP_780660    | 64       | 3             | cell surface, endoplasmic reticulum, integral to membrane, membrane         | protein binding                                                                                                                                                                                                                                                                 | biological_process                                                                                                                                                                                                                                                                                                                                                                                                            |
| U5 snRNP-specific protein, 200 kDa                                                | Ascc31    | NP_796188    | 245      | 3             | ribonucleoprotein complex                                                   | ATP binding, helicase activity, hydrolase activity, nucleic acid binding, nucleotide binding                                                                                                                                                                                    | not classified                                                                                                                                                                                                                                                                                                                                                                                                                |
| acetyl-Coenzyme A acyltransferase 2 (mitochondrial 3-oxoacyl-Coenzyme A thiolase) | Acaa2     | NP_803421    | 42       | 3             | mitochondrial inner membrane, mitochondrion                                 | acetyl-CoA C-acyltransferase activity, acyltransferase activity, catalytic activity, transferase activity, transferring acyl groups other than amino-acyl groups                                                                                                                | fatty acid metabolic process, lipid metabolic process, metabolic process                                                                                                                                                                                                                                                                                                                                                      |

| Protein Name                                                                           | Gene Name    | Accession No | Mw (kDa) | Peptide Count | GO Component                                                                             | GO Function                                                                                                                                                                             | GO Process                                                                                                |
|----------------------------------------------------------------------------------------|--------------|--------------|----------|---------------|------------------------------------------------------------------------------------------|-----------------------------------------------------------------------------------------------------------------------------------------------------------------------------------------|-----------------------------------------------------------------------------------------------------------|
| prominin 2 isoform 2                                                                   | Prom2        | NP_835148    | 55       | 3             | cell projection, cilium, integral to membrane, membrane, plasma membrane                 | not classified                                                                                                                                                                          | not classified                                                                                            |
| importin 7                                                                             | Ipo7         | NP_852658    | 119      | 3             | cytoplasm, nucleus                                                                       | binding, histone binding, protein binding, protein transporter activity                                                                                                                 | intracellular protein transport, protein import into nucleus, protein transport, transport                |
| SWI/SNF-related matrix-associated actin-dependent regulator of chromatin c2 isoform 3  | Smarcc2      | NP_937803    | 121      | 3             | chromatin, nucleus                                                                       | chromatin binding, DNA binding                                                                                                                                                          | chromatin assembly or disassembly, chromatin modification, regulation of transcription, transcription     |
| RAB35, member RAS oncogene family                                                      | Rab35        | NP_937806    | 23       | 3             | membrane, plasma membrane                                                                | GTP binding, nucleotide binding                                                                                                                                                         | protein transport, small GTPase mediated signal transduction, transport                                   |
| pantophysin isoform 2                                                                  | Syp1         | NP_942003    | 27       | 3             | cytoplasmic vesicle, integral to membrane, membrane, secretory granule, synaptic vesicle | transporter activity                                                                                                                                                                    | transport                                                                                                 |
| ring finger protein 138 isoform 1                                                      | Rnf138       | NP_997506    | 28       | 3             | cellular_component, intracellular                                                        | ligase activity, metal ion binding, molecular_function, protein binding, zinc ion binding                                                                                               | biological_process, modification-dependent protein catabolic process, Wnt receptor signaling pathway      |
| glycerol kinase isoform 2                                                              | Gyk          | NP_997609    | 61       | 3             | cytoplasm, membrane, mitochondrial outer membrane, mitochondrion                         | ATP binding, glycerol kinase activity, kinase activity, nucleotide binding, phosphotransferase activity, alcohol group as acceptor, transferase activity                                | carbohydrate metabolic process, glycerol metabolic process, glycerol-3-phosphate metabolic process        |
| hypothetical protein LOC270156                                                         | AU019823     | NP_997614    | 31       | 3             | not classified                                                                           | not classified                                                                                                                                                                          | not classified                                                                                            |
| PREDICTED: hypothetical protein                                                        | LOC100039525 | XP_001473106 | 18       | 3             | not classified                                                                           | not classified                                                                                                                                                                          | not classified                                                                                            |
| PREDICTED: hypothetical protein                                                        | EG621837     | XP_001473932 | 9        | 3             | not classified                                                                           | not classified                                                                                                                                                                          | not classified                                                                                            |
| PREDICTED: hypothetical protein                                                        | LOC100046199 | XP_001475883 | 21       | 3             | not classified                                                                           | not classified                                                                                                                                                                          | not classified                                                                                            |
| PREDICTED: similar to Phosphoserine aminotransferase 1 isoform 2                       | LOC100047252 | XP_001478041 | 36       | 3             | not classified                                                                           | not classified                                                                                                                                                                          | not classified                                                                                            |
| PREDICTED: similar to proteasome (prosome, macropain) subunit, alpha type, 8 isoform 4 | Psma8        | XP_911847    | 24       | 3             | cytoplasm, nucleus, proteasome complex, proteasome core complex                          | endopeptidase activity, hydrolase activity, peptidase activity, threonine-type endopeptidase activity                                                                                   | proteolysis involved in cellular protein catabolic process, ubiquitin-dependent protein catabolic process |
| PREDICTED: hypothetical protein                                                        | LOC634429    | XP_914246    | 282      | 3             | not classified                                                                           | not classified                                                                                                                                                                          | not classified                                                                                            |
| eukaryotic translation initiation factor 4, gamma 1 isoform b                          | Eif4g1       | NP_001005331 | 175      | 2             | cytoplasm                                                                                | protein binding, RNA binding, translation initiation factor activity                                                                                                                    | regulation of translation, RNA metabolic process, translation                                             |
| aspartylglucosaminidase                                                                | Aga          | NP_001005847 | 37       | 2             | lysosome                                                                                 | hydrolase activity, N4-(beta-N-acetylglucosaminy)-L-asparaginase activity                                                                                                               | protein maturation                                                                                        |
| ribonuclease, RNase A family, 12 (non-active)                                          | Rnase12      | NP_001011875 | 17       | 2             | extracellular region                                                                     | nucleic acid binding, pancreatic ribonuclease activity                                                                                                                                  | not classified                                                                                            |
| proteasome activator subunit 2 isoform 2                                               | Psme2        | NP_001025026 | 26       | 2             | proteasome activator complex, proteasome complex                                         | proteasome activator activity, protein binding                                                                                                                                          | antigen processing and presentation of exogenous antigen                                                  |
| NADH dehydrogenase (ubiquinone) Fe-S protein 5                                         | Ndufs5       | NP_001025445 | 13       | 2             | mitochondrion                                                                            | not classified                                                                                                                                                                          | not classified                                                                                            |
| glycogen synthase kinase 3 alpha                                                       | Gsk3a        | NP_001026837 | 52       | 2             | not classified                                                                           | ATP binding, kinase activity, nucleotide binding, protein binding, protein kinase activity, protein serine/threonine kinase activity, tau-protein kinase activity, transferase activity | insulin receptor signaling pathway, protein amino acid phosphorylation                                    |
| nuclear cap binding protein subunit 1, 80kDa                                           | AU014645     | NP_001028373 | 92       | 2             | cellular_component, nucleus                                                              | molecular_function, protein binding, RNA binding                                                                                                                                        | biological_process, mRNA transport, RNA metabolic process, transport                                      |

| Protein Name                                                                        | Gene Name | Accession No | Mw (kDa) | Peptide Count | GO Component                                                                                                                                                                            | GO Function                                                                                                                                                                                                                                     | GO Process                                                                                                                                                                                |
|-------------------------------------------------------------------------------------|-----------|--------------|----------|---------------|-----------------------------------------------------------------------------------------------------------------------------------------------------------------------------------------|-------------------------------------------------------------------------------------------------------------------------------------------------------------------------------------------------------------------------------------------------|-------------------------------------------------------------------------------------------------------------------------------------------------------------------------------------------|
| NADH dehydrogenase (ubiquinone) 1 beta subcomplex, 6                                | Ndufb6    | NP_001028477 | 16       | 2             | integral to membrane, membrane, mitochondrial inner membrane, mitochondrion, respiratory chain                                                                                          | not classified                                                                                                                                                                                                                                  | electron transport chain, transport                                                                                                                                                       |
| hypothetical protein LOC328099                                                      | AU021838  | NP_001032835 | 28       | 2             | not classified                                                                                                                                                                          | not classified                                                                                                                                                                                                                                  | not classified                                                                                                                                                                            |
| milk fat globule-EGF factor 8 protein isoform 2                                     | Mfge8     | NP_001038954 | 47       | 2             | external side of plasma membrane, extracellular space, extrinsic to plasma membrane, membrane                                                                                           | integrin binding, phosphatidylethanolamine binding, phosphatidylserine binding, protein binding                                                                                                                                                 | cell adhesion, phagocytosis, engulfment, phagocytosis, recognition, positive regulation of phagocytosis, single fertilization                                                             |
| ribosomal protein L38                                                               | Rpl38     | NP_001041522 | 8        | 2             | cellular_component, intracellular, ribonucleoprotein complex, ribosome                                                                                                                  | molecular_function, structural constituent of ribosome                                                                                                                                                                                          | biological_process, translation                                                                                                                                                           |
| glutathione S-transferase, alpha 3                                                  | Gsta3     | NP_001070821 | 25       | 2             | cytoplasm                                                                                                                                                                               | glutathione transferase activity, transferase activity                                                                                                                                                                                          | metabolic process                                                                                                                                                                         |
| enhancer trap locus 4                                                               | Etl4      | NP_001074475 | 218      | 2             | cytoplasm                                                                                                                                                                               | not classified                                                                                                                                                                                                                                  | embryonic skeletal system development, multicellular organismal development                                                                                                               |
| apoptotic chromatin condensation inducer 1 isoform 4                                | Acin1     | NP_001078942 | 65       | 2             | nucleolus, nucleus                                                                                                                                                                      | nucleic acid binding, nucleotide binding                                                                                                                                                                                                        | apoptosis                                                                                                                                                                                 |
| ADP-ribosylation factor guanine nucleotide-exchange factor 1(brefeldin A-inhibited) | Arfgef1   | NP_001095900 | 208      | 2             | cellular_component                                                                                                                                                                      | molecular_function                                                                                                                                                                                                                              | biological_process                                                                                                                                                                        |
| catenin (cadherin associated protein), alpha 2 isoform 2                            | Ctnna2    | NP_001103234 | 105      | 2             | actin cytoskeleton, adherens junction, axon, basolateral plasma membrane, cell junction, cell-cell adherens junction, cytoplasm, cytoskeleton, lamellipodium, membrane, plasma membrane | cadherin binding, protein binding, structural molecule activity                                                                                                                                                                                 | axonogenesis, brain morphogenesis, cell adhesion, dendrite morphogenesis, prepulse inhibition, radial glia guided migration of Purkinje cell, regulation of synapse structural plasticity |
| arsenate resistance protein 2 isoform 3                                             | Ars2      | NP_001103380 | 99       | 2             | cellular_component                                                                                                                                                                      | molecular_function                                                                                                                                                                                                                              | not classified                                                                                                                                                                            |
| elongation factor Tu GTP binding domain containing 2 isoform b                      | Eftud2    | NP_001103465 | 109      | 2             | nucleus, spliceosomal complex                                                                                                                                                           | GTP binding, GTPase activity, nucleotide binding, protein binding, translation elongation factor activity                                                                                                                                       | mRNA processing, RNA splicing                                                                                                                                                             |
| peptidylprolyl isomerase H isoform 1                                                | Ppih      | NP_001103599 | 19       | 2             | cytoplasm, nucleus, spliceosomal complex                                                                                                                                                | isomerase activity, peptidyl-prolyl cis-trans isomerase activity                                                                                                                                                                                | mRNA processing, protein folding, RNA splicing                                                                                                                                            |
| hypothetical protein LOC209550                                                      | EG209550  | NP_001104588 | 112      | 2             | not classified                                                                                                                                                                          | not classified                                                                                                                                                                                                                                  | not classified                                                                                                                                                                            |
| isocitrate dehydrogenase 1 (NADP+), soluble                                         | Idh1      | NP_001104790 | 47       | 2             | cytoplasm, cytosol                                                                                                                                                                      | isocitrate dehydrogenase (NADP+) activity, magnesium ion binding, manganese ion binding, metal ion binding, NAD or NADH binding, oxidoreductase activity, oxidoreductase activity, acting on the CH-OH group of donors, NAD or NADP as acceptor | glutathione metabolic process, glyoxylate cycle, isocitrate metabolic process, oxidation reduction, response to oxidative stress, tricarboxylic acid cycle                                |
| adaptor protein complex AP-1, beta 1 subunit                                        | Ap1b1     | NP_031480    | 104      | 2             | clathrin adaptor complex, cytoplasmic vesicle, Golgi apparatus, membrane, membrane coat, trans-Golgi network                                                                            | binding, protein binding, protein transporter activity                                                                                                                                                                                          | endocytosis, intracellular protein transport, protein transport, transport, vesicle-mediated transport                                                                                    |
| capping protein (actin filament) muscle Z-line, alpha 2                             | Capza2    | NP_031630    | 33       | 2             | cortical cytoskeleton, F-actin capping protein complex, membrane                                                                                                                        | actin binding                                                                                                                                                                                                                                   | actin cytoskeleton organization, actin filament capping                                                                                                                                   |
| chaperonin subunit 2 (beta)                                                         | Cct2      | NP_031662    | 57       | 2             | chaperonin-containing T-complex, cytoplasm                                                                                                                                              | ATP binding, nucleotide binding, protein binding, unfolded protein binding                                                                                                                                                                      | cellular protein metabolic process, protein folding                                                                                                                                       |

| Protein Name                                            | Gene Name | Accession No | Mw (kDa) | Peptide Count | GO Component                                                                                             | GO Function                                                                                                                                                                                                      | GO Process                                                                                                                                                                                                                                                                                                                                                                         |
|---------------------------------------------------------|-----------|--------------|----------|---------------|----------------------------------------------------------------------------------------------------------|------------------------------------------------------------------------------------------------------------------------------------------------------------------------------------------------------------------|------------------------------------------------------------------------------------------------------------------------------------------------------------------------------------------------------------------------------------------------------------------------------------------------------------------------------------------------------------------------------------|
| chondroitin sulfate proteoglycan 6                      | Smc3      | NP_031816    | 142      | 2             | chromosome, lateral element, nucleus                                                                     | ATP binding, nucleotide binding, protein binding                                                                                                                                                                 | cell cycle, cell division, chromosome organization, DNA repair, meiosis, mitosis, response to DNA damage stimulus                                                                                                                                                                                                                                                                  |
| cysteine and glycine-rich protein 1                     | Csrp1     | NP_031817    | 21       | 2             | actin cytoskeleton, nucleus                                                                              | metal ion binding, protein binding, zinc ion binding                                                                                                                                                             | actin cytoskeleton organization                                                                                                                                                                                                                                                                                                                                                    |
| microtubule-associated protein, RP/EB family, member 1  | Mapre1    | NP_031922    | 30       | 2             | cell projection membrane, cytoplasm, cytoplasmic microtubule, cytoskeleton, Golgi apparatus, microtubule | microtubule binding, microtubule plus-end binding, protein binding                                                                                                                                               | cell cycle, cell division, mitosis                                                                                                                                                                                                                                                                                                                                                 |
| enolase 3, beta muscle                                  | Eno3      | NP_031959    | 47       | 2             | cytoplasm, phosphopyruvate hydratase complex                                                             | lyase activity, magnesium ion binding, metal ion binding, phosphopyruvate hydratase activity                                                                                                                     | glycolysis                                                                                                                                                                                                                                                                                                                                                                         |
| enhancer of rudimentary homolog                         | Erh       | NP_031977    | 12       | 2             | not classified                                                                                           | molecular_function                                                                                                                                                                                               | cell cycle                                                                                                                                                                                                                                                                                                                                                                         |
| ferredoxin 1                                            | Fdx1      | NP_032022    | 20       | 2             | mitochondrion                                                                                            | 2 iron, 2 sulfur cluster binding, electron carrier activity, iron ion binding, iron-sulfur cluster binding, metal ion binding                                                                                    | electron transport chain, transport                                                                                                                                                                                                                                                                                                                                                |
| ferrochelatase                                          | Fech      | NP_032024    | 47       | 2             | membrane, mitochondrial inner membrane, mitochondrion                                                    | 2 iron, 2 sulfur cluster binding, ferrochelatase activity, heme binding, iron ion binding, iron-responsive element binding, iron-sulfur cluster binding, lyase activity, metal ion binding, tetrapyrrole binding | cholesterol metabolic process, detection of UV, erythrocyte differentiation, heme biosynthetic process, iron ion homeostasis, porphyrin biosynthetic process, protoporphyrinogen IX metabolic process, regulation of eIF2 alpha phosphorylation by heme, regulation of hemoglobin biosynthetic process, response to light stimulus, very-low-density lipoprotein particle assembly |
| glyceraldehyde-3-phosphate dehydrogenase, spermatogenic | Gapdhs    | NP_032111    | 47       | 2             | cytoplasm, flagellum, microtubule-based flagellum                                                        | glyceraldehyde-3-phosphate dehydrogenase (phosphorylating) activity, glyceraldehyde-3-phosphate dehydrogenase activity, NAD or NADH binding, oxidoreductase activity                                             | glucose metabolic process, glycolysis, oxidation reduction, positive regulation of glycolysis, sperm motility                                                                                                                                                                                                                                                                      |

| Protein Name                            | Gene Name | Accession No | Mw (kDa) | Peptide Count | GO Component                                              | GO Function                                                                                                      | GO Process                                                                                                                                                                                                                                                                                                                                                                                                                                                                                                                                                                                                                                                                                                                                                                                                                                                                                                                                |
|-----------------------------------------|-----------|--------------|----------|---------------|-----------------------------------------------------------|------------------------------------------------------------------------------------------------------------------|-------------------------------------------------------------------------------------------------------------------------------------------------------------------------------------------------------------------------------------------------------------------------------------------------------------------------------------------------------------------------------------------------------------------------------------------------------------------------------------------------------------------------------------------------------------------------------------------------------------------------------------------------------------------------------------------------------------------------------------------------------------------------------------------------------------------------------------------------------------------------------------------------------------------------------------------|
| glutathione peroxidase 1                | Gpx1      | NP_032186    | 22       | 2             | cytoplasm, mitochondrion                                  | glutathione peroxidase activity, oxidoreductase activity, peroxidase activity, selenium binding                  | angiogenesis involved in wound healing, apoptosis, blood vessel endothelial cell migration, cell proliferation, endothelial cell development, fat cell differentiation, heart contraction, hydrogen peroxide catabolic process, induction of apoptosis, induction of apoptosis by oxidative stress, interaction with symbiont, lipid metabolic process, myoblast proliferation, myotube differentiation, negative regulation of apoptosis, negative regulation of inflammatory response to antigenic stimulus, oxidation reduction, positive regulation of protein kinase B signaling cascade, protein amino acid oxidation, regulation of neuron apoptosis, response to gamma radiation, response to hydrogen peroxide, response to hydroperoxide, response to oxidative stress, response to reactive oxygen species, response to symbiotic bacterium, response to toxin, response to wounding, response to xenobiotic stimulus, sensory |
| glutathione S-transferase, alpha 1 (Ya) | Gsta1     | NP_032207    | 26       | 2             | not classified                                            | glutathione transferase activity, transferase activity                                                           | glutathione metabolic process, metabolic process                                                                                                                                                                                                                                                                                                                                                                                                                                                                                                                                                                                                                                                                                                                                                                                                                                                                                          |
| histidyl-tRNA synthetase                | Hars      | NP_032240    | 58       | 2             | cytoplasm                                                 | aminoacyl-tRNA ligase activity, ATP binding, histidine-tRNA ligase activity, ligase activity, nucleotide binding | histidyl-tRNA aminoacylation, translation, tRNA aminoacylation for protein translation                                                                                                                                                                                                                                                                                                                                                                                                                                                                                                                                                                                                                                                                                                                                                                                                                                                    |
| high mobility group box 2               | Hmgb2     | NP_032278    | 24       | 2             | chromosome, nucleus                                       | DNA binding                                                                                                      | male gonad development, positive regulation of gene-specific transcription from RNA polymerase II promoter, response to steroid hormone stimulus, spermatogenesis                                                                                                                                                                                                                                                                                                                                                                                                                                                                                                                                                                                                                                                                                                                                                                         |
| Harvey rat sarcoma virus oncogene 1     | Hras1     | NP_032310    | 21       | 2             | Golgi apparatus, intracellular, membrane, plasma membrane | GTP binding, nucleotide binding, protein binding                                                                 | cell aging, cell proliferation, endocytosis, negative regulation of neuron apoptosis, positive regulation of cell proliferation, Ras protein signal transduction, regulation of long-term neuronal synaptic plasticity, small GTPase mediated signal transduction                                                                                                                                                                                                                                                                                                                                                                                                                                                                                                                                                                                                                                                                         |
| karyopherin (importin) beta 1           | Kpnb1     | NP_032405    | 97       | 2             | cytoplasm, nucleus                                        | binding, protein binding, protein transporter activity                                                           | intracellular protein transport, protein import into nucleus, protein transport, ribosomal protein import into nucleus, transport                                                                                                                                                                                                                                                                                                                                                                                                                                                                                                                                                                                                                                                                                                                                                                                                         |
| napsin A aspartic peptidase             | Napsa     | NP_032463    | 46       | 2             | not classified                                            | aspartic-type endopeptidase activity, hydrolase activity, peptidase activity                                     | proteolysis                                                                                                                                                                                                                                                                                                                                                                                                                                                                                                                                                                                                                                                                                                                                                                                                                                                                                                                               |
| keratin 15                              | Krt15     | NP_032495    | 49       | 2             | intermediate filament                                     | structural molecule activity                                                                                     | not classified                                                                                                                                                                                                                                                                                                                                                                                                                                                                                                                                                                                                                                                                                                                                                                                                                                                                                                                            |



| Protein Name                                                                               | Gene Name | Accession No | Mw (kDa) | Peptide Count | GO Component                                                                        | GO Function                                                                                                                                                                                      | GO Process                                                                                                                 |
|--------------------------------------------------------------------------------------------|-----------|--------------|----------|---------------|-------------------------------------------------------------------------------------|--------------------------------------------------------------------------------------------------------------------------------------------------------------------------------------------------|----------------------------------------------------------------------------------------------------------------------------|
| tumor-associated calcium signal transducer 1                                               | Tacstd1   | NP_032558    | 35       | 2             | apical plasma membrane, basolateral plasma membrane, integral to membrane, membrane | not classified                                                                                                                                                                                   | not classified                                                                                                             |
| ATP-binding cassette, sub-family C, member 1                                               | Abcc1     | NP_032602    | 171      | 2             | integral to membrane, integral to plasma membrane, membrane, plasma membrane        | ATP binding, ATPase activity, ATPase activity, coupled to transmembrane movement of substances, hydrolase activity, nucleoside-triphosphatase activity, nucleotide binding, transporter activity | transport                                                                                                                  |
| solute carrier family 3 (activators of dibasic and neutral amino acid transport), member 2 | Slc3a2    | NP_032603    | 58       | 2             | integral to membrane, membrane, plasma membrane                                     | catalytic activity, cation binding, protein binding                                                                                                                                              | amino acid transport, carbohydrate metabolic process, transport                                                            |
| 4-nitrophenylphosphatase domain and non-neuronal SNAP25-like protein homolog 1             | Nipsnap1  | NP_032724    | 33       | 2             | mitochondrial inner membrane, mitochondrion                                         | molecular_function                                                                                                                                                                               | biological_process                                                                                                         |
| nucleobindin 1                                                                             | Nucb1     | NP_032775    | 53       | 2             | cytoplasm, Golgi apparatus, membrane                                                | calcium ion binding, DNA binding                                                                                                                                                                 | not classified                                                                                                             |
| platelet-activating factor acetylhydrolase, isoform 1b, alpha1 subunit                     | Pafah1b3  | NP_032802    | 26       | 2             | cytoplasm                                                                           | 1-alkyl-2-acetylglycerophosphocholine esterase activity, hydrolase activity, hydrolase activity, acting on ester bonds, lipase activity, protein binding                                         | lipid catabolic process, lipid metabolic process, spermatogenesis                                                          |
| protein-L-isoaspartate (D-aspartate) O-methyltransferase 1                                 | Pcmt1     | NP_032812    | 25       | 2             | cytoplasm                                                                           | methyltransferase activity, protein-L-isoaspartate (D-aspartate) O-methyltransferase activity, transferase activity                                                                              | protein amino acid methylation, protein modification process                                                               |
| peptidase D                                                                                | Pepd      | NP_032846    | 55       | 2             | not classified                                                                      | aminopeptidase activity, dipeptidase activity, hydrolase activity, manganese ion binding, metal ion binding, metalloexopeptidase activity, metallopeptidase activity, peptidase activity         | cellular process, collagen catabolic process, proteolysis                                                                  |
| phosphofructokinase, liver, B-type                                                         | Pfkl      | NP_032852    | 85       | 2             | 6-phosphofructokinase complex, cytoplasm, cytosol                                   | 6-phosphofructokinase activity, ATP binding, kinase activity, magnesium ion binding, metal ion binding, nucleotide binding, transferase activity                                                 | fructose 6-phosphate metabolic process, glycolysis, negative regulation of insulin secretion, response to glucose stimulus |
| proteasome (prosome, macropain) subunit, alpha type 2                                      | Psma2     | NP_032970    | 26       | 2             | cytoplasm, nucleus, proteasome complex, proteasome core complex                     | endopeptidase activity, hydrolase activity, peptidase activity, threonine-type endopeptidase activity                                                                                            | proteolysis involved in cellular protein catabolic process, ubiquitin-dependent protein catabolic process                  |
| protease (prosome, macropain) 26S subunit, ATPase 1                                        | Psmc1     | NP_032973    | 49       | 2             | cytoplasm, nucleus, proteasome complex                                              | ATP binding, hydrolase activity, nucleoside-triphosphatase activity, nucleotide binding                                                                                                          | protein catabolic process                                                                                                  |
| polypyrimidine tract binding protein 1 isoform 2                                           | Ptbp1     | NP_032982    | 57       | 2             | nucleus                                                                             | nucleic acid binding, nucleotide binding, protein binding, RNA binding                                                                                                                           | mRNA processing, RNA splicing                                                                                              |
| retinoblastoma binding protein 4                                                           | Rbbp4     | NP_033056    | 48       | 2             | nucleus, NuRD complex                                                               | protein binding                                                                                                                                                                                  | cell cycle, chromatin modification, chromatin remodeling, DNA replication, regulation of transcription, transcription      |
| regucalcin                                                                                 | Rgn       | NP_033086    | 33       | 2             | cytoplasm, nucleus                                                                  | calcium ion binding, enzyme regulator activity                                                                                                                                                   | not classified                                                                                                             |

| Protein Name                                                  | Gene Name | Accession No | Mw (kDa) | Peptide Count | GO Component                                                                                                     | GO Function                                                                                                                                  | GO Process                                                                                                                                                                                                                          |
|---------------------------------------------------------------|-----------|--------------|----------|---------------|------------------------------------------------------------------------------------------------------------------|----------------------------------------------------------------------------------------------------------------------------------------------|-------------------------------------------------------------------------------------------------------------------------------------------------------------------------------------------------------------------------------------|
| serine hydroxymethyltransferase 1 (soluble)                   | Shmt1     | NP_033197    | 53       | 2             | cytoplasm, mitochondrion                                                                                         | catalytic activity, glycine hydroxymethyltransferase activity, methyltransferase activity, pyridoxal phosphate binding, transferase activity | glycine metabolic process, L-serine metabolic process, one-carbon metabolic process                                                                                                                                                 |
| small nuclear ribonucleoprotein D1                            | Snrpd1    | NP_033252    | 13       | 2             | cytoplasm, nucleus, ribonucleoprotein complex, spliceosomal complex                                              | not classified                                                                                                                               | mRNA processing, RNA splicing                                                                                                                                                                                                       |
| small nuclear ribonucleoprotein E                             | Snrpe     | NP_033253    | 11       | 2             | nucleus, ribonucleoprotein complex, spliceosomal complex                                                         | RNA binding                                                                                                                                  | mRNA processing, RNA splicing                                                                                                                                                                                                       |
| serine (or cysteine) proteinase inhibitor, clade A, member 1c | Serpina1c | NP_033271    | 46       | 2             | extracellular region                                                                                             | peptidase inhibitor activity, protein binding, serine-type endopeptidase inhibitor activity                                                  | protein amino acid N-linked glycosylation, response to cytokine stimulus, response to peptide hormone stimulus                                                                                                                      |
| syntaxin 4A (placental)                                       | Stx4a     | NP_033320    | 34       | 2             | cytoplasm, integral to membrane, membrane, perinuclear region of cytoplasm, plasma membrane, trans-Golgi network | protein binding, SNAP receptor activity                                                                                                      | intracellular protein transport, neurotransmitter transport, synaptic vesicle exocytosis, transport                                                                                                                                 |
| TAP binding protein isoform 2                                 | Tapbp     | NP_033344    | 50       | 2             | endoplasmic reticulum, integral to membrane, integral to plasma membrane, membrane, microsome                    | not classified                                                                                                                               | antigen processing and presentation of endogenous peptide antigen via MHC class I, antigen processing and presentation of exogenous peptide antigen via MHC class I, TAP-dependent, defense response, peptide antigen stabilization |
| transcription factor A, mitochondrial                         | Tfam      | NP_033386    | 28       | 2             | mitochondrion, nucleus, transcription factor complex                                                             | DNA binding, transcription factor activity                                                                                                   | mitochondrial respiratory chain complex assembly, regulation of transcription, transcription                                                                                                                                        |
| proteasome 26S non-ATPase subunit 3                           | Psm3      | NP_033465    | 61       | 2             | proteasome complex                                                                                               | enzyme regulator activity                                                                                                                    | regulation of protein catabolic process                                                                                                                                                                                             |
| Wiskott-Aldrich syndrome homolog                              | Was       | NP_033541    | 54       | 2             | cytoplasm, cytoskeleton, vesicle membrane                                                                        | identical protein binding, protein binding                                                                                                   | actin filament polymerization, actin filament-based movement, actin polymerization or depolymerization, endosome transport, T cell activation                                                                                       |
| aldolase C, fructose-bisphosphate                             | Aldoc     | NP_033787    | 39       | 2             | mitochondrion                                                                                                    | catalytic activity, fructose-bisphosphate aldolase activity, lyase activity, protein binding                                                 | glycolysis, metabolic process                                                                                                                                                                                                       |
| branched chain aminotransferase 2, mitochondrial              | Bcat2     | NP_033867    | 44       | 2             | mitochondrion                                                                                                    | branched-chain-amino-acid transaminase activity, catalytic activity, transaminase activity, transferase activity                             | branched chain family amino acid biosynthetic process, branched chain family amino acid catabolic process, branched chain family amino acid metabolic process, cellular amino acid biosynthetic process, metabolic process          |
| cyclin K                                                      | Ccnk      | NP_033962    | 64       | 2             | not classified                                                                                                   | not classified                                                                                                                               | cell cycle, cell division, mitosis, regulation of transcription, transcription                                                                                                                                                      |
| chaperonin containing Tcp1, subunit 6a (zeta)                 | Cct6a     | NP_033968    | 58       | 2             | chaperonin-containing T-complex, cytoplasm                                                                       | ATP binding, nucleotide binding, protein binding, unfolded protein binding                                                                   | cellular protein metabolic process, protein folding                                                                                                                                                                                 |
| cell division cycle 10 homolog                                | 7-Sep     | NP_033989    | 51       | 2             | cytoplasm, septin complex, synaptosome                                                                           | GTP binding, nucleotide binding, protein binding                                                                                             | cell cycle, cell division, mitosis                                                                                                                                                                                                  |

| Protein Name                                                  | Gene Name | Accession No | Mw (kDa) | Peptide Count | GO Component                                                                          | GO Function                                                                                                                                                                              | GO Process                                                                                                                                                                                                                                                                                                                                                                                                                              |
|---------------------------------------------------------------|-----------|--------------|----------|---------------|---------------------------------------------------------------------------------------|------------------------------------------------------------------------------------------------------------------------------------------------------------------------------------------|-----------------------------------------------------------------------------------------------------------------------------------------------------------------------------------------------------------------------------------------------------------------------------------------------------------------------------------------------------------------------------------------------------------------------------------------|
| cell division cycle 42                                        | Cdc42     | NP_033991    | 21       | 2             | apical part of cell, cell projection, intracellular, membrane, plasma membrane        | GTP binding, GTPase activity, GTP-dependent protein binding, nucleotide binding, protein binding                                                                                         | adherens junction organization, cell division, cell-cell adhesion, cellular protein localization, endosome transport, establishment or maintenance of apical/basal cell polarity, filopodium assembly, neuron fate determination, nuclear migration, nucleus localization, positive regulation of phosphoinositide 3-kinase activity, regulation of mitosis, Rho protein signal transduction, small GTPase mediated signal transduction |
| claudin 3                                                     | Cldn3     | NP_034032    | 23       | 2             | cell junction, integral to membrane, membrane, plasma membrane, tight junction        | identical protein binding, structural molecule activity                                                                                                                                  | calcium-independent cell-cell adhesion                                                                                                                                                                                                                                                                                                                                                                                                  |
| dihydropyrimidinase-like 2                                    | Dpysl2    | NP_034085    | 62       | 2             | axon, cell soma, cytoplasm, dendrite, mitochondrion                                   | hydrolase activity                                                                                                                                                                       | cell differentiation, multicellular organismal development, nervous system development                                                                                                                                                                                                                                                                                                                                                  |
| dynein cytoplasmic 1 intermediate chain 2                     | Dync1i2   | NP_034194    | 68       | 2             | dynein complex, microtubule                                                           | motor activity                                                                                                                                                                           | not classified                                                                                                                                                                                                                                                                                                                                                                                                                          |
| FK506 binding protein 4                                       | Fkbp4     | NP_034349    | 52       | 2             | cytoplasm, nucleus                                                                    | ATP binding, binding, glucocorticoid receptor binding, GTP binding, heat shock protein binding, isomerase activity, peptidyl-prolyl cis-trans isomerase activity, phosphoprotein binding | androgen receptor signaling pathway, embryo implantation, male sex differentiation, prostate gland development, protein complex localization, protein folding, reproductive structure development, steroid hormone receptor complex assembly                                                                                                                                                                                            |
| ferritin heavy chain 1                                        | Fth1      | NP_034369    | 21       | 2             | not classified                                                                        | binding, ferric iron binding, ferroxidase activity, iron ion binding, metal ion binding, oxidoreductase activity                                                                         | cellular iron ion homeostasis, iron ion transport, oxidation reduction                                                                                                                                                                                                                                                                                                                                                                  |
| guanine deaminase                                             | Gda       | NP_034396    | 51       | 2             | not classified                                                                        | guanine deaminase activity, hydrolase activity, metal ion binding, protein binding, zinc ion binding                                                                                     | not classified                                                                                                                                                                                                                                                                                                                                                                                                                          |
| gamma-glutamyl hydrolase                                      | Ggh       | NP_034411    | 35       | 2             | extracellular region, lysosome                                                        | catalytic activity, gamma-glutamyl-peptidase activity, hydrolase activity, omega peptidase activity, peptidase activity                                                                  | glutamine metabolic process                                                                                                                                                                                                                                                                                                                                                                                                             |
| glutathione S-transferase, theta 2                            | Gstt2     | NP_034491    | 28       | 2             | cytoplasm, nucleus                                                                    | glutathione transferase activity, transferase activity                                                                                                                                   | glutathione metabolic process                                                                                                                                                                                                                                                                                                                                                                                                           |
| glutathione transferase zeta 1 (maleylacetoacetate isomerase) | Gstz1     | NP_034493    | 24       | 2             | cytoplasm, mitochondrion                                                              | catalytic activity, glutathione transferase activity, isomerase activity, maleylacetoacetate isomerase activity, transferase activity                                                    | aromatic amino acid family metabolic process, L-phenylalanine catabolic process, tyrosine catabolic process                                                                                                                                                                                                                                                                                                                             |
| histocompatibility 13                                         | H13       | NP_034506    | 42       | 2             | endoplasmic reticulum, endoplasmic reticulum membrane, integral to membrane, membrane | aspartic-type endopeptidase activity, hydrolase activity, peptidase activity                                                                                                             | not classified                                                                                                                                                                                                                                                                                                                                                                                                                          |

| Protein Name                                               | Gene Name | Accession No | Mw (kDa) | Peptide Count | GO Component                                                                                                           | GO Function                                                                                                                                                                                                       | GO Process                                                                                                                                                                                                                                                                                                                                                                                       |
|------------------------------------------------------------|-----------|--------------|----------|---------------|------------------------------------------------------------------------------------------------------------------------|-------------------------------------------------------------------------------------------------------------------------------------------------------------------------------------------------------------------|--------------------------------------------------------------------------------------------------------------------------------------------------------------------------------------------------------------------------------------------------------------------------------------------------------------------------------------------------------------------------------------------------|
| mago-nashi homolog, proliferation-associated               | Magoh     | NP_034890    | 17       | 2             | cytoplasm, nucleus, spliceosomal complex                                                                               | RNA binding                                                                                                                                                                                                       | female gamete generation, mRNA processing, mRNA transport, nuclear-transcribed mRNA catabolic process, nonsense-mediated decay, regulation of translation, RNA splicing, transport                                                                                                                                                                                                               |
| matrin 3                                                   | Matr3     | NP_034901    | 95       | 2             | intracellular, nucleus                                                                                                 | metal ion binding, nucleic acid binding, nucleotide binding, RNA binding, zinc ion binding                                                                                                                        | not classified                                                                                                                                                                                                                                                                                                                                                                                   |
| macrophage migration inhibitory factor                     | Mif       | NP_034928    | 13       | 2             | cytoplasm, extracellular region, extracellular space                                                                   | cytokine activity, dopachrome isomerase activity, isomerase activity, phenylpyruvate tautomerase activity                                                                                                         | cell aging, DNA damage response, signal transduction by p53 class mediator, immune response, inflammatory response, innate immune response, regulation of cell proliferation                                                                                                                                                                                                                     |
| proteasome (prosome, macropain) 26S subunit, non-ATPase, 7 | Psmd7     | NP_034947    | 37       | 2             | proteasome complex                                                                                                     | not classified                                                                                                                                                                                                    | not classified                                                                                                                                                                                                                                                                                                                                                                                   |
| COX4 neighbor                                              | Cox4nb    | NP_035056    | 23       | 2             | mitochondrion                                                                                                          | not classified                                                                                                                                                                                                    | not classified                                                                                                                                                                                                                                                                                                                                                                                   |
| proteasome (prosome, macropain) subunit, alpha type 3      | Psma3     | NP_035314    | 28       | 2             | cytoplasm, nucleus, proteasome complex, proteasome core complex                                                        | endopeptidase activity, hydrolase activity, peptidase activity, protein binding, threonine-type endopeptidase activity                                                                                            | proteolysis involved in cellular protein catabolic process, ubiquitin-dependent protein catabolic process                                                                                                                                                                                                                                                                                        |
| proteasome (prosome, macropain) 26S subunit, ATPase 2      | Psmc2     | NP_035318    | 53       | 2             | cytoplasm, nucleus, proteasome complex                                                                                 | ATP binding, hydrolase activity, nucleoside-triphosphatase activity, nucleotide binding, protein binding                                                                                                          | protein catabolic process                                                                                                                                                                                                                                                                                                                                                                        |
| RAB geranylgeranyl transferase, b subunit                  | Rabggtb   | NP_035361    | 38       | 2             | not classified                                                                                                         | catalytic activity, metal ion binding, prenyltransferase activity, Rab geranylgeranyltransferase activity, transferase activity, zinc ion binding                                                                 | not classified                                                                                                                                                                                                                                                                                                                                                                                   |
| ribosomal protein L10A                                     | Rpl10a    | NP_035417    | 25       | 2             | cellular_component, intracellular, ribonucleoprotein complex, ribosome                                                 | molecular_function, RNA binding, structural constituent of ribosome                                                                                                                                               | biological_process, RNA processing, translation                                                                                                                                                                                                                                                                                                                                                  |
| SEC22 vesicle trafficking protein-like 1                   | Sec22b    | NP_035472    | 25       | 2             | endoplasmic reticulum, endoplasmic reticulum membrane, Golgi apparatus, Golgi membrane, integral to membrane, membrane | not classified                                                                                                                                                                                                    | ER to Golgi vesicle-mediated transport, protein transport, transport, vesicle-mediated transport                                                                                                                                                                                                                                                                                                 |
| transgelin                                                 | Tagln     | NP_035656    | 23       | 2             | cytoplasm                                                                                                              | not classified                                                                                                                                                                                                    | cytoskeleton organization, muscle organ development                                                                                                                                                                                                                                                                                                                                              |
| tripartite motif protein 28                                | Trim28    | NP_035718    | 89       | 2             | chromatin, intracellular, nuclear euchromatin, nuclear heterochromatin, nucleolus, nucleoplasm, nucleus                | metal ion binding, protein binding, protein kinase activity, sequence-specific DNA binding, transcription coactivator activity, transcription factor activity, transcription repressor activity, zinc ion binding | epithelial to mesenchymal transition, negative regulation of transcription from RNA polymerase II promoter, negative regulation of transcription, DNA-dependent, positive regulation of gene-specific transcription, positive regulation of transcription, DNA-dependent, protein amino acid autophosphorylation, protein amino acid phosphorylation, regulation of transcription, transcription |

| Protein Name                                                                            | Gene Name | Accession No | Mw (kDa) | Peptide Count | GO Component                                                                                                                | GO Function                                                                                                                                                                                      | GO Process                                                                                                                                                                                                                                                                       |
|-----------------------------------------------------------------------------------------|-----------|--------------|----------|---------------|-----------------------------------------------------------------------------------------------------------------------------|--------------------------------------------------------------------------------------------------------------------------------------------------------------------------------------------------|----------------------------------------------------------------------------------------------------------------------------------------------------------------------------------------------------------------------------------------------------------------------------------|
| translin                                                                                | Tsn       | NP_035780    | 26       | 2             | cytoplasm, nucleus                                                                                                          | DNA binding, mRNA binding, protein binding, RNA binding, sequence-specific DNA binding                                                                                                           | not classified                                                                                                                                                                                                                                                                   |
| thioredoxin 1                                                                           | Txn1      | NP_035790    | 12       | 2             | cytoplasm, cytosol, mitochondrion, nucleus                                                                                  | peptide disulfide oxidoreductase activity, protein binding                                                                                                                                       | cell redox homeostasis, electron transport chain, negative regulation of protein export from nucleus, negative regulation of transcription from RNA polymerase II promoter, transport                                                                                            |
| ubiquitin-conjugating enzyme E2I                                                        | Ube2i     | NP_035795    | 18       | 2             | cytoplasm, nucleus                                                                                                          | ATP binding, HLH domain binding, ligase activity, nucleotide binding, protein binding, small conjugating protein ligase activity                                                                 | cell cycle, cell division, chromosome segregation, interspecies interaction between organisms, mitosis, modification-dependent protein catabolic process, multicellular organismal development, post-translational protein modification, regulation of protein metabolic process |
| tyrosine 3-monooxygenase/tryptophan 5-monooxygenase activation protein, eta polypeptide | Ywhah     | NP_035868    | 28       | 2             | cytoplasm                                                                                                                   | actin binding, protein binding, protein domain specific binding                                                                                                                                  | cytoskeleton organization, intracellular protein transport, negative regulation of apoptosis, negative regulation of dendrite morphogenesis, regulation of mitosis                                                                                                               |
| solute carrier family 27 (fatty acid transporter), member 2                             | Slc27a2   | NP_036108    | 70       | 2             | endoplasmic reticulum, integral to membrane, membrane, mitochondrion, peroxisome                                            | ATP binding, catalytic activity, fatty acid transporter activity, ligase activity, long-chain-fatty-acid-CoA ligase activity, nucleotide binding, very-long-chain-fatty-acid-CoA ligase activity | fatty acid metabolic process, fatty acid transport, lipid metabolic process, long-chain fatty acid metabolic process, metabolic process, very-long-chain fatty acid metabolic process                                                                                            |
| dihydropyrimidinase-related protein 4                                                   | Dpysl4    | NP_036123    | 62       | 2             | cytoplasm                                                                                                                   | hydrolase activity, protein binding                                                                                                                                                              | not classified                                                                                                                                                                                                                                                                   |
| clusterin                                                                               | Clu       | NP_038520    | 52       | 2             | extracellular region                                                                                                        | not classified                                                                                                                                                                                   | cell death                                                                                                                                                                                                                                                                       |
| proprotein convertase subtilisin/kexin type 1                                           | Pcsk1     | NP_038656    | 84       | 2             | cytoplasmic vesicle, extracellular space                                                                                    | calcium ion binding, hydrolase activity, peptidase activity, serine-type endopeptidase activity, serine-type peptidase activity                                                                  | peptide biosynthetic process, peptide hormone processing, protein maturation by peptide bond cleavage, proteolysis                                                                                                                                                               |
| t-complex protein 1                                                                     | Tcp1      | NP_038714    | 60       | 2             | chaperonin-containing T-complex, cytoplasm, microtubule organizing center, nuclear heterochromatin, pericentriolar material | ATP binding, nucleotide binding, protein binding, unfolded protein binding                                                                                                                       | cellular protein metabolic process, protein folding                                                                                                                                                                                                                              |
| transducin (beta)-like 2                                                                | Tbl2      | NP_038791    | 50       | 2             | cellular_component                                                                                                          | molecular_function                                                                                                                                                                               | biological_process                                                                                                                                                                                                                                                               |
| tight junction protein 3                                                                | Tjp3      | NP_038797    | 99       | 2             | cell junction, membrane, plasma membrane, tight junction                                                                    | protein binding                                                                                                                                                                                  | not classified                                                                                                                                                                                                                                                                   |
| drebrin-like                                                                            | Dbnl      | NP_038838    | 48       | 2             | cell cortex, cell projection, cytoplasm, cytoskeleton, intracellular, lamellipodium, ruffle                                 | actin binding, actin filament binding, protein binding                                                                                                                                           | actin filament bundle formation, actin filament severing, barbed-end actin filament capping, endocytosis, immune response, Rac protein signal transduction                                                                                                                       |

| Protein Name                                     | Gene Name | Accession No | Mw (kDa) | Peptide Count | GO Component                                                                                                                      | GO Function                                                                                                                                                         | GO Process                                                                                                                                                                                                                                                                                                                                                                                                                                                                                                                                                                                              |
|--------------------------------------------------|-----------|--------------|----------|---------------|-----------------------------------------------------------------------------------------------------------------------------------|---------------------------------------------------------------------------------------------------------------------------------------------------------------------|---------------------------------------------------------------------------------------------------------------------------------------------------------------------------------------------------------------------------------------------------------------------------------------------------------------------------------------------------------------------------------------------------------------------------------------------------------------------------------------------------------------------------------------------------------------------------------------------------------|
| chloride intracellular channel 4 (mitochondrial) | Clic4     | NP_038913    | 29       | 2             | chloride channel complex, cytoplasm, cytoplasmic vesicle, integral to membrane, membrane, mitochondrion, nucleus, plasma membrane | chloride channel activity, chloride ion binding, ion channel activity, protein binding, voltage-gated chloride channel activity, voltage-gated ion channel activity | chloride transport, ion transport, transport                                                                                                                                                                                                                                                                                                                                                                                                                                                                                                                                                            |
| galactosamine (N-acetyl)-6-sulfate sulfatase     | Gains     | NP_057931    | 58       | 2             | lysosome                                                                                                                          | calcium ion binding, catalytic activity, hydrolase activity, metal ion binding, N-acetylgalactosamine-6-sulfatase activity, sulfuric ester hydrolase activity       | metabolic process                                                                                                                                                                                                                                                                                                                                                                                                                                                                                                                                                                                       |
| Nedd8 ultimate buster-1                          | Nub1      | NP_058016    | 70       | 2             | nucleus                                                                                                                           | not classified                                                                                                                                                      | not classified                                                                                                                                                                                                                                                                                                                                                                                                                                                                                                                                                                                          |
| MYB binding protein (P160) 1a                    | Mybbp1a   | NP_058056    | 152      | 2             | cytoplasm, NLS-dependent protein nuclear import complex, nucleolus, nucleus                                                       | DNA binding, DNA-directed DNA polymerase activity, protein binding, transcription factor binding, transcription repressor activity, zinc ion binding                | negative regulation of transcription, nucleocytoplasmic transport, regulation of transcription, respiratory electron transport chain, transcription                                                                                                                                                                                                                                                                                                                                                                                                                                                     |
| thiopurine methyltransferase                     | Tpmt      | NP_058065    | 28       | 2             | cytoplasm                                                                                                                         | methyltransferase activity, thiopurine S-methyltransferase activity, transferase activity                                                                           | metabolic process                                                                                                                                                                                                                                                                                                                                                                                                                                                                                                                                                                                       |
| ubiquitin-conjugating enzyme E2-25K              | Ube2k     | NP_058066    | 22       | 2             | cellular_component, cytoplasm                                                                                                     | ATP binding, ligase activity, nucleotide binding, small conjugating protein ligase activity, ubiquitin-protein ligase activity                                      | modification-dependent protein catabolic process, post-translational protein modification, regulation of protein metabolic process                                                                                                                                                                                                                                                                                                                                                                                                                                                                      |
| syntaxin 7                                       | Stx7      | NP_058077    | 30       | 2             | endosome, integral to membrane, membrane                                                                                          | iron ion binding, protein binding, SNAP receptor activity                                                                                                           | intracellular protein transport                                                                                                                                                                                                                                                                                                                                                                                                                                                                                                                                                                         |
| ras homolog gene family, member A                | Rhoa      | NP_058082    | 22       | 2             | cytoplasm, cytoskeleton, cytosol, intracellular, membrane, nucleus, plasma membrane                                               | GTP binding, GTPase activity, nucleotide binding, protein binding                                                                                                   | actin cytoskeleton organization, androgen receptor signaling pathway, cell adhesion, cell differentiation, cell morphogenesis, cell-matrix adhesion, integrin-mediated signaling pathway, negative regulation of neuron apoptosis, negative regulation of steroid hormone receptor signaling pathway, positive regulation of neuron differentiation, positive regulation of stress fiber formation, regulation of transcription from RNA polymerase II promoter, Rho protein signal transduction, skeletal muscle tissue development, small GTPase mediated signal transduction, stress fiber formation |
| RNA binding motif protein 3                      | Rbm3      | NP_058089    | 17       | 2             | not classified                                                                                                                    | nucleic acid binding, nucleotide binding, ribosomal large subunit binding, RNA binding                                                                              | production of miRNAs involved in gene silencing by miRNA, response to cold, translation                                                                                                                                                                                                                                                                                                                                                                                                                                                                                                                 |
| ARP1 actin-related protein 1 homolog A           | Actr1a    | NP_058556    | 43       | 2             | cytoplasm, cytoskeleton                                                                                                           | ATP binding, nucleotide binding, protein binding                                                                                                                    | not classified                                                                                                                                                                                                                                                                                                                                                                                                                                                                                                                                                                                          |
| keratin complex 2, basic gene 18                 | Krt85     | NP_058575    | 56       | 2             | intermediate filament, keratin filament                                                                                           | structural molecule activity                                                                                                                                        | not classified                                                                                                                                                                                                                                                                                                                                                                                                                                                                                                                                                                                          |

| Protein Name                                      | Gene Name | Accession No | Mw (kDa) | Peptide Count | GO Component                                                                                                     | GO Function                                                                                                                                              | GO Process                                                                                                                                                                                                                                 |
|---------------------------------------------------|-----------|--------------|----------|---------------|------------------------------------------------------------------------------------------------------------------|----------------------------------------------------------------------------------------------------------------------------------------------------------|--------------------------------------------------------------------------------------------------------------------------------------------------------------------------------------------------------------------------------------------|
| Sec61 alpha subunit homolog                       | Sec61a1   | NP_058602    | 52       | 2             | endoplasmic reticulum, integral to membrane, membrane                                                            | P-P-bond-hydrolysis-driven protein transmembrane transporter activity, ribosome binding                                                                  | protein transport, transmembrane transport, transport                                                                                                                                                                                      |
| ribosomal protein S3a                             | Rps3a     | NP_058655    | 30       | 2             | cytosol, intracellular, nucleus, ribonucleoprotein complex, ribosome                                             | protein binding, structural constituent of ribosome                                                                                                      | translation                                                                                                                                                                                                                                |
| eukaryotic translation elongation factor 1 beta 2 | Eef1b2    | NP_061266    | 25       | 2             | eukaryotic translation elongation factor 1 complex                                                               | translation elongation factor activity                                                                                                                   | translation, translational elongation                                                                                                                                                                                                      |
| nucleoporin 210                                   | Nup210    | NP_061285    | 204      | 2             | endoplasmic reticulum, integral to membrane, membrane, nuclear envelope, nuclear pore, nucleus                   | not classified                                                                                                                                           | mRNA transport, protein transport, transmembrane transport, transport                                                                                                                                                                      |
| nucleolar protein 5                               | Nol5      | NP_061356    | 60       | 2             | nucleolus, nucleus                                                                                               | snoRNP binding                                                                                                                                           | ribosome biogenesis                                                                                                                                                                                                                        |
| profilin 2                                        | Pfn2      | NP_062283    | 15       | 2             | actin cytoskeleton, cytoplasm, cytoskeleton                                                                      | actin binding, protein binding                                                                                                                           | actin cytoskeleton organization, cytoskeleton organization                                                                                                                                                                                 |
| arsA arsenite transporter, ATP-binding, homolog 1 | Asna1     | NP_062626    | 39       | 2             | not classified                                                                                                   | arsenite transmembrane-transporting ATPase activity, ATP binding, hydrolase activity, nucleotide binding                                                 | cellular metal ion homeostasis, response to arsenic                                                                                                                                                                                        |
| soc-2 (suppressor of clear) homolog               | Shoc2     | NP_062632    | 65       | 2             | not classified                                                                                                   | protein binding                                                                                                                                          | not classified                                                                                                                                                                                                                             |
| NS1-associated protein 1 isoform 1                | Syncrip   | NP_062640    | 70       | 2             | cytoplasm, nucleus, ribonucleoprotein complex, spliceosomal complex                                              | nucleic acid binding, poly(A) RNA binding, RNA binding                                                                                                   | mRNA processing, RNA splicing                                                                                                                                                                                                              |
| RuvB-like protein 1                               | Ruvb1     | NP_062659    | 50       | 2             | nucleus, ribonucleoprotein complex                                                                               | ATP binding, DNA helicase activity, helicase activity, hydrolase activity, nucleoside-triphosphatase activity, nucleotide binding, protein binding       | cell cycle, cell division, chromatin modification, DNA recombination, mitosis, regulation of growth, regulation of transcription, transcription                                                                                            |
| ADP-ribosylation factor-like 3                    | Arl3      | NP_062692    | 20       | 2             | Golgi apparatus, intracellular, membrane, nucleus                                                                | GTP binding, magnesium ion binding, metal ion binding, nucleotide binding                                                                                | cell cycle, cell division, small GTPase mediated signal transduction                                                                                                                                                                       |
| non-metastatic cells 3, protein expressed in      | Nme3      | NP_062704    | 19       | 2             | not classified                                                                                                   | ATP binding, kinase activity, magnesium ion binding, metal ion binding, nucleoside diphosphate kinase activity, nucleotide binding, transferase activity | CTP biosynthetic process, GTP biosynthetic process, nucleotide metabolic process, UTP biosynthetic process                                                                                                                                 |
| SUMO1 activating enzyme subunit 1                 | Sae1      | NP_062722    | 39       | 2             | nucleus                                                                                                          | binding, catalytic activity, ligase activity, small protein activating enzyme activity                                                                   | metabolic process, modification-dependent protein catabolic process, protein modification process                                                                                                                                          |
| prostaglandin E synthase 3 (cytosolic)            | Ptges3    | NP_062740    | 19       | 2             | cellular_component, cytoplasm                                                                                    | isomerase activity, molecular_function, prostaglandin-E synthase activity                                                                                | cell proliferation, fatty acid biosynthetic process, glucocorticoid receptor signaling pathway, glycogen biosynthetic process, lipid biosynthetic process, lung sacculle development, prostaglandin biosynthetic process, skin development |
| coatamer protein complex, subunit zeta 1          | Copz1     | NP_062791    | 20       | 2             | COPI vesicle coat, COPI-coated vesicle, cytoplasm, cytoplasmic vesicle, Golgi apparatus, membrane, membrane coat | protein binding                                                                                                                                          | intracellular protein transport, protein transport, transport, vesicle-mediated transport                                                                                                                                                  |
| adhesion regulating molecule 1                    | Adrm1     | NP_062796    | 42       | 2             | cytoplasm, nucleus, proteasome complex                                                                           | not classified                                                                                                                                           | not classified                                                                                                                                                                                                                             |
| canopy 2 homolog                                  | Cnpy2     | NP_064337    | 21       | 2             | endoplasmic reticulum                                                                                            | molecular_function                                                                                                                                       | biological_process                                                                                                                                                                                                                         |
| START domain containing 10                        | Stard10   | NP_064374    | 33       | 2             | cell projection, cilium, flagellum                                                                               | not classified                                                                                                                                           | not classified                                                                                                                                                                                                                             |

| Protein Name                                                                     | Gene Name | Accession No | Mw (kDa) | Peptide Count | GO Component                                                                                                                 | GO Function                                                                                                                                                                                              | GO Process                                                                                                                                                                                                                                       |
|----------------------------------------------------------------------------------|-----------|--------------|----------|---------------|------------------------------------------------------------------------------------------------------------------------------|----------------------------------------------------------------------------------------------------------------------------------------------------------------------------------------------------------|--------------------------------------------------------------------------------------------------------------------------------------------------------------------------------------------------------------------------------------------------|
| signal transducing adaptor family member 1                                       | Stap1     | NP_064376    | 35       | 2             | cellular_component, cytoplasm                                                                                                | protein binding, SH3/SH2 adaptor activity                                                                                                                                                                | myeloid cell differentiation, transmembrane receptor protein tyrosine kinase signaling pathway                                                                                                                                                   |
| Parkinson disease protein 7                                                      | Park7     | NP_065594    | 20       | 2             | cytoplasm, mitochondrion, nucleus                                                                                            | peroxiredoxin activity, RNA binding                                                                                                                                                                      | adult locomotory behavior, cell proliferation, dopamine uptake, hydrogen peroxide metabolic process, membrane depolarization, membrane hyperpolarization, response to hydrogen peroxide, response to stress, synaptic transmission, dopaminergic |
| glucosidase 1                                                                    | Gcs1      | NP_065644    | 92       | 2             | endoplasmic reticulum, integral to membrane, membrane                                                                        | hydrolase activity, hydrolase activity, acting on glycosyl bonds, mannosyl-oligosaccharide glucosidase activity                                                                                          | metabolic process, oligosaccharide metabolic process                                                                                                                                                                                             |
| epsilon subunit of coatamer protein complex                                      | Cope      | NP_067513    | 35       | 2             | COPI vesicle coat, COPI-coated vesicle, cytoplasm, cytoplasmic vesicle, Golgi apparatus, membrane                            | binding, protein binding, structural molecule activity                                                                                                                                                   | protein transport, retrograde vesicle-mediated transport, Golgi to ER, transport, vesicle-mediated transport                                                                                                                                     |
| tropomyosin 3, gamma                                                             | Tpm3      | NP_071709    | 33       | 2             | cleavage furrow, cortical cytoskeleton, cytoplasm, cytoskeleton, filamentous actin, growth cone, neuron projection, podosome | actin binding                                                                                                                                                                                            | not classified                                                                                                                                                                                                                                   |
| ribosomal protein L23                                                            | Rpl23     | NP_075029    | 15       | 2             | cytosolic ribosome, intracellular, nucleolus, ribonucleoprotein complex, ribosome                                            | structural constituent of ribosome                                                                                                                                                                       | translation                                                                                                                                                                                                                                      |
| NADH dehydrogenase (ubiquinone) 1 beta subcomplex, 9                             | Ndubf9    | NP_075661    | 22       | 2             | membrane, mitochondrial inner membrane, mitochondrion, respiratory chain                                                     | not classified                                                                                                                                                                                           | electron transport chain, transport                                                                                                                                                                                                              |
| ubiquitin-conjugating enzyme E2 variant 1                                        | Ube2v1    | NP_075719    | 16       | 2             | nucleus                                                                                                                      | protein binding, small conjugating protein ligase activity                                                                                                                                               | modification-dependent protein catabolic process, post-translational protein modification, regulation of protein metabolic process                                                                                                               |
| carbamoyl-phosphate synthetase 2, aspartate transcarbamylase, and dihydroorotase | Cad       | NP_076014    | 243      | 2             | cytoplasm, cytosol, nucleus                                                                                                  | aspartate carbamoyltransferase activity, ATP binding, carbamoyl-phosphate synthase (glutamine-hydrolyzing) activity, dihydroorotase activity, protein kinase activity, transferase activity, UTP binding | 'de novo' pyrimidine base biosynthetic process, peptidyl-threonine phosphorylation, protein amino acid autophosphorylation                                                                                                                       |
| ATPase, H+ transporting, V1 subunit D                                            | Atp6v1d   | NP_076210    | 28       | 2             | proton-transporting two-sector ATPase complex, catalytic domain                                                              | ATPase activity, coupled to transmembrane movement of substances, proton-transporting ATPase activity, rotational mechanism                                                                              | ATP synthesis coupled proton transport, ion transport, proton transport, transport                                                                                                                                                               |
| Sec61 beta subunit                                                               | Sec61b    | NP_077133    | 10       | 2             | cellular_component, endoplasmic reticulum, integral to membrane, membrane                                                    | ribosome binding                                                                                                                                                                                         | biological_process, protein transport, transmembrane transport, transport                                                                                                                                                                        |
| nucleolar protein 5A                                                             | Nol5a     | NP_077155    | 64       | 2             | nucleus                                                                                                                      | not classified                                                                                                                                                                                           | ribosome biogenesis                                                                                                                                                                                                                              |
| quinoid dihydropteridine reductase                                               | Qdpr      | NP_077198    | 26       | 2             | not classified                                                                                                               | 6,7-dihydropteridine reductase activity, binding, catalytic activity, oxidoreductase activity                                                                                                            | metabolic process, oxidation reduction, tetrahydrobiopterin biosynthetic process                                                                                                                                                                 |



| Protein Name                                                           | Gene Name      | Accession No | Mw (kDa) | Peptide Count | GO Component                                                                                              | GO Function                                                                                                                                                                                                                                  | GO Process                                                                                                                                                          |
|------------------------------------------------------------------------|----------------|--------------|----------|---------------|-----------------------------------------------------------------------------------------------------------|----------------------------------------------------------------------------------------------------------------------------------------------------------------------------------------------------------------------------------------------|---------------------------------------------------------------------------------------------------------------------------------------------------------------------|
| RAB6A, member RAS oncogene family                                      | Rab6           | NP_077249    | 24       | 2             | Golgi apparatus, membrane                                                                                 | GTP binding, nucleotide binding, protein binding                                                                                                                                                                                             | intracellular protein transport, peptidyl-cysteine methylation, protein transport, small GTPase mediated signal transduction, transport, vesicle-mediated transport |
| RAB5C, member RAS oncogene family                                      | Rab5c          | NP_077776    | 23       | 2             | endocytic vesicle, endosome, membrane, plasma membrane                                                    | GTP binding, GTPase activity, nucleotide binding                                                                                                                                                                                             | endosome organization, protein transport, regulation of endocytosis, small GTPase mediated signal transduction, transport                                           |
| small glutamine-rich tetratricopeptide repeat (TPR) containing protein | Sgta           | NP_078775    | 34       | 2             | cellular_component                                                                                        | binding, protein binding, protein heterodimerization activity, protein homodimerization activity                                                                                                                                             | biological_process                                                                                                                                                  |
| succinate dehydrogenase complex, subunit C, integral membrane protein  | Sdhc           | NP_079597    | 18       | 2             | integral to membrane, membrane, mitochondrial inner membrane, mitochondrion                               | electron carrier activity, iron ion binding, metal ion binding, succinate dehydrogenase activity                                                                                                                                             | electron transport chain, transport, tricarboxylic acid cycle                                                                                                       |
| ubiquinol-cytochrome c reductase, complex III subunit VII              | Uqcrcq         | NP_079628    | 10       | 2             | membrane, mitochondrial inner membrane, mitochondrion, respiratory chain                                  | ubiquinol-cytochrome-c reductase activity                                                                                                                                                                                                    | electron transport chain, transport                                                                                                                                 |
| acylphosphatase 1, erythrocyte (common) type                           | Acyp1          | NP_079697    | 11       | 2             | not classified                                                                                            | acylphosphatase activity, hydrolase activity                                                                                                                                                                                                 | not classified                                                                                                                                                      |
| DnaJ (Hsp40) homolog, subfamily C, member 5 beta                       | Dnajc5b        | NP_079765    | 23       | 2             | membrane                                                                                                  | heat shock protein binding, unfolded protein binding                                                                                                                                                                                         | protein folding                                                                                                                                                     |
| DC2 protein                                                            | Z310008M10 Rik | NP_079785    | 17       | 2             | integral to membrane, membrane                                                                            | not classified                                                                                                                                                                                                                               | not classified                                                                                                                                                      |
| proteasome, 26S, non-ATPase regulatory subunit 6                       | Psm6           | NP_079826    | 46       | 2             | proteasome complex                                                                                        | not classified                                                                                                                                                                                                                               | not classified                                                                                                                                                      |
| 13kDa differentiation-associated protein                               | Ndufa12        | NP_079827    | 18       | 2             | membrane, mitochondrial inner membrane, mitochondrion, respiratory chain                                  | electron carrier activity, NADH dehydrogenase (ubiquinone) activity                                                                                                                                                                          | electron transport chain, transport                                                                                                                                 |
| polymerase (RNA) II (DNA directed) polypeptide E                       | Polr2e         | NP_079830    | 25       | 2             | nucleus                                                                                                   | DNA binding, DNA-directed RNA polymerase activity                                                                                                                                                                                            | transcription                                                                                                                                                       |
| cytochrome b5 type B precursor                                         | Cyb5b          | NP_079834    | 16       | 2             | integral to membrane, membrane, mitochondrial inner membrane, mitochondrial outer membrane, mitochondrion | heme binding, iron ion binding, metal ion binding                                                                                                                                                                                            | electron transport chain, transport                                                                                                                                 |
| ribosomal protein L35                                                  | Rpl35          | NP_079868    | 15       | 2             | cellular_component, intracellular, ribonucleoprotein complex, ribosome                                    | molecular_function, structural constituent of ribosome                                                                                                                                                                                       | biological_process, translation                                                                                                                                     |
| NADH dehydrogenase (ubiquinone) 1 beta subcomplex 3                    | Ndufb3         | NP_079873    | 12       | 2             | integral to membrane, membrane, mitochondrial inner membrane, mitochondrion, respiratory chain            | NADH dehydrogenase (ubiquinone) activity                                                                                                                                                                                                     | electron transport chain, transport                                                                                                                                 |
| translocase of inner mitochondrial membrane 50 homolog                 | Timm50         | NP_079892    | 40       | 2             | integral to membrane, membrane, mitochondrial inner membrane, mitochondrion                               | interleukin-2 receptor binding, phosphoprotein phosphatase activity, protein binding                                                                                                                                                         | protein transport, release of cytochrome c from mitochondria, transmembrane transport, transport                                                                    |
| UMP-CMP kinase                                                         | Cmpk           | NP_079923    | 26       | 2             | cytoplasm, nucleus                                                                                        | ATP binding, cytidylate kinase activity, kinase activity, nucleobase, nucleoside, nucleotide kinase activity, nucleotide binding, nucleotide kinase activity, phosphotransferase activity, phosphate group as acceptor, transferase activity | nucleobase, nucleoside, nucleotide and nucleic acid metabolic process, pyrimidine nucleotide biosynthetic process                                                   |

| Protein Name                                          | Gene Name      | Accession No | Mw (kDa) | Peptide Count | GO Component                                                                                                          | GO Function                                                                                                                                                                           | GO Process                                                                                       |
|-------------------------------------------------------|----------------|--------------|----------|---------------|-----------------------------------------------------------------------------------------------------------------------|---------------------------------------------------------------------------------------------------------------------------------------------------------------------------------------|--------------------------------------------------------------------------------------------------|
| signal recognition particle 72                        | Srp72          | NP_079967    | 75       | 2             | nucleolus, signal recognition particle, endoplasmic reticulum targeting                                               | molecular_function                                                                                                                                                                    | SRP-dependent cotranslational protein targeting to membrane                                      |
| trafficking protein particle complex 5                | Trappc5        | NP_079977    | 21       | 2             | endoplasmic reticulum, Golgi apparatus, TRAPP complex                                                                 | protein binding                                                                                                                                                                       | transport, vesicle-mediated transport                                                            |
| tetratricopeptide repeat domain 35                    | Ttc35          | NP_080012    | 35       | 2             | nucleus                                                                                                               | binding                                                                                                                                                                               | not classified                                                                                   |
| coiled-coil domain containing 47                      | Ccdc47         | NP_080285    | 56       | 2             | endoplasmic reticulum, integral to membrane, membrane, microsome                                                      | calcium ion binding                                                                                                                                                                   | calcium ion homeostasis, embryonic development, ER overload response, post-embryonic development |
| small nuclear ribonucleoprotein D3                    | Snrpd3         | NP_080371    | 14       | 2             | cytoplasm, nucleus, ribonucleoprotein complex, spliceosomal complex                                                   | nucleic acid binding                                                                                                                                                                  | mRNA processing, RNA splicing                                                                    |
| signal sequence receptor, gamma                       | Ssr3           | NP_080431    | 21       | 2             | endoplasmic reticulum, integral to endoplasmic reticulum membrane, integral to membrane, membrane, translocon complex | receptor activity                                                                                                                                                                     | cotranslational protein targeting to membrane                                                    |
| ribosomal protein S27-like                            | Rps27l         | NP_080743    | 9        | 2             | not classified                                                                                                        | not classified                                                                                                                                                                        | not classified                                                                                   |
| TNF receptor-associated protein 1                     | Trap1          | NP_080784    | 80       | 2             | mitochondrion                                                                                                         | ATP binding, nucleotide binding, unfolded protein binding                                                                                                                             | protein folding, response to stress                                                              |
| chitinase domain containing 1                         | Chid1          | NP_080798    | 36       | 2             | extracellular region, lysosome                                                                                        | catalytic activity, cation binding, chitinase activity, hydrolase activity, hydrolyzing O-glycosyl compounds                                                                          | carbohydrate metabolic process, chitin catabolic process                                         |
| dynein light chain LC8-type 2                         | Dynll2         | NP_080832    | 10       | 2             | cytoplasm, dynein complex, microtubule, microtubule associated complex, myosin complex                                | microtubule motor activity, motor activity, protein binding                                                                                                                           | intracellular transport, microtubule-based process                                               |
| nucleolar protein family A, member 1                  | Nola1          | NP_080854    | 23       | 2             | dense fibrillar component, nucleus, ribonucleoprotein complex, small nucleolar ribonucleoprotein complex              | RNA binding, rRNA binding, snoRNA binding                                                                                                                                             | biological_process, ribosome biogenesis, rRNA processing                                         |
| family with sequence similarity 98, member B          | Z610510H03 Rik | NP_080896    | 45       | 2             | not classified                                                                                                        | not classified                                                                                                                                                                        | not classified                                                                                   |
| NADH dehydrogenase (ubiquinone) 1 beta subcomplex, 10 | Ndufb10        | NP_080960    | 21       | 2             | membrane, mitochondrial inner membrane, mitochondrion, respiratory chain                                              | not classified                                                                                                                                                                        | electron transport chain, transport                                                              |
| enoyl Coenzyme A hydratase domain containing 2        | Echdc2         | NP_081004    | 26       | 2             | mitochondrion                                                                                                         | catalytic activity, lyase activity                                                                                                                                                    | fatty acid metabolic process, lipid metabolic process, metabolic process                         |
| dolichyl-phosphate mannosyltransferase polypeptide 3  | Dpm3           | NP_081043    | 10       | 2             | endoplasmic reticulum, integral to membrane, membrane                                                                 | not classified                                                                                                                                                                        | not classified                                                                                   |
| RAB, member of RAS oncogene family-like 2A            | Rabl2a         | NP_081093    | 26       | 2             | not classified                                                                                                        | GTP binding, nucleotide binding                                                                                                                                                       | not classified                                                                                   |
| histidine triad nucleotide binding protein 2          | Hint2          | NP_081147    | 17       | 2             | extracellular region, mitochondrion                                                                                   | catalytic activity, hydrolase activity                                                                                                                                                | not classified                                                                                   |
| bolA-like 1                                           | Bola1          | NP_081251    | 14       | 2             | not classified                                                                                                        | not classified                                                                                                                                                                        | not classified                                                                                   |
| translocation protein 1                               | Sec62          | NP_081292    | 46       | 2             | endoplasmic reticulum, integral to membrane, membrane                                                                 | protein transporter activity                                                                                                                                                          | protein transport, transmembrane transport, transport                                            |
| mannosidase, beta A, lysosomal                        | Manba          | NP_081564    | 101      | 2             | lysosome                                                                                                              | beta-mannosidase activity, catalytic activity, cation binding, hydrolase activity, hydrolase activity, acting on glycosyl bonds, hydrolase activity, hydrolyzing O-glycosyl compounds | carbohydrate metabolic process, glycoprotein catabolic process, metabolic process                |

| Protein Name                                                              | Gene Name      | Accession No | Mw (kDa) | Peptide Count | GO Component                                                                                        | GO Function                                                                                                                                                             | GO Process                                                                                                              |
|---------------------------------------------------------------------------|----------------|--------------|----------|---------------|-----------------------------------------------------------------------------------------------------|-------------------------------------------------------------------------------------------------------------------------------------------------------------------------|-------------------------------------------------------------------------------------------------------------------------|
| asparaginyl-tRNA synthetase                                               | Nars           | NP_081626    | 63       | 2             | cytoplasm                                                                                           | aminoacyl-tRNA ligase activity, asparagine-tRNA ligase activity, aspartate-tRNA ligase activity, ATP binding, ligase activity, nucleic acid binding, nucleotide binding | asparaginyl-tRNA aminoacylation, aspartyl-tRNA aminoacylation, translation, tRNA aminoacylation for protein translation |
| golgi reassembly stacking protein 2                                       | Gorasp2        | NP_081628    | 47       | 2             | Golgi apparatus, membrane                                                                           | molecular_function, protein binding                                                                                                                                     | biological_process                                                                                                      |
| proteasome 26S non-ATPase subunit 1                                       | Psm1           | NP_081633    | 106      | 2             | proteasome complex                                                                                  | binding, enzyme regulator activity                                                                                                                                      | regulation of protein catabolic process                                                                                 |
| hypothetical protein LOC70564                                             | 5730469M10 Rik | NP_081740    | 24       | 2             | extracellular region                                                                                | not classified                                                                                                                                                          | not classified                                                                                                          |
| IQ motif containing GTPase activating protein 2                           | Iqgap2         | NP_081987    | 181      | 2             | intracellular                                                                                       | calmodulin binding, GTPase activator activity, protein binding                                                                                                          | regulation of small GTPase mediated signal transduction                                                                 |
| zinc finger protein 297B isoform a                                        | Zbtb43         | NP_082223    | 57       | 2             | intracellular, nucleus                                                                              | DNA binding, metal ion binding, nucleic acid binding, protein binding, zinc ion binding                                                                                 | regulation of transcription, transcription                                                                              |
| serine (or cysteine) proteinase inhibitor, clade B (ovalbumin), member 12 | Serp1b2        | NP_082247    | 48       | 2             | cytoplasm                                                                                           | peptidase inhibitor activity, serine-type endopeptidase inhibitor activity                                                                                              | not classified                                                                                                          |
| keratin 33A                                                               | Krt33a         | NP_082259    | 46       | 2             | cellular_component, intermediate filament                                                           | protein binding, structural molecule activity                                                                                                                           | biological_process                                                                                                      |
| thioredoxin domain containing 1                                           | Txndc1         | NP_082615    | 31       | 2             | endoplasmic reticulum, integral to membrane, membrane                                               | not classified                                                                                                                                                          | cell redox homeostasis, electron transport chain, transport                                                             |
| hypothetical protein LOC73112                                             | 3110003A17 Rik | NP_082716    | 9        | 2             | not classified                                                                                      | not classified                                                                                                                                                          | not classified                                                                                                          |
| RNA binding motif protein 19                                              | Rbm19          | NP_083038    | 106      | 2             | nucleolus, nucleus                                                                                  | nucleic acid binding, nucleotide binding, RNA binding                                                                                                                   | not classified                                                                                                          |
| septin 14                                                                 | 1700016K13 Rik | NP_083102    | 50       | 2             | septin complex                                                                                      | GTP binding, nucleotide binding, protein binding                                                                                                                        | cell cycle, cell division                                                                                               |
| fumarylacetoacetate hydrolase domain containing 2A                        | Fahd2a         | NP_083905    | 35       | 2             | not classified                                                                                      | calcium ion binding, catalytic activity, hydrolase activity, magnesium ion binding, metal ion binding                                                                   | metabolic process                                                                                                       |
| signal peptidase complex subunit 3                                        | Spcs3          | NP_083977    | 20       | 2             | not classified                                                                                      | not classified                                                                                                                                                          | not classified                                                                                                          |
| actin related protein 2/3 complex, subunit 2                              | Arpc2          | NP_083987    | 34       | 2             | Arp2/3 protein complex, cell leading edge, cell projection, cytoplasm, cytoskeleton, focal adhesion | actin binding, protein binding                                                                                                                                          | positive regulation of actin filament polymerization, regulation of actin filament polymerization                       |
| ADP-ribosylation factor interacting protein 2                             | Arfp2          | NP_084078    | 38       | 2             | not classified                                                                                      | not classified                                                                                                                                                          | not classified                                                                                                          |
| hypothetical protein LOC77006                                             | 2600009E05 Rik | NP_084108    | 36       | 2             | extracellular region                                                                                | not classified                                                                                                                                                          | not classified                                                                                                          |
| transmembrane protein 33 isoform 2                                        | Tmem33         | NP_084384    | 28       | 2             | cellular_component, integral to membrane, membrane                                                  | protein binding                                                                                                                                                         | biological_process                                                                                                      |
| splicing factor 3b, subunit 2                                             | Sf3b2          | NP_084385    | 98       | 2             | not classified                                                                                      | protein binding                                                                                                                                                         | not classified                                                                                                          |
| V-set and immunoglobulin domain containing 1                              | Vsig1          | NP_084457    | 44       | 2             | integral to membrane, membrane                                                                      | not classified                                                                                                                                                          | not classified                                                                                                          |
| melanoma antigen family D, 2                                              | Maged2         | NP_109625    | 65       | 2             | cellular_component                                                                                  | molecular_function                                                                                                                                                      | biological_process                                                                                                      |
| phosphoglycerate kinase 2                                                 | Pgk2           | NP_112467    | 45       | 2             | cytoplasm                                                                                           | ATP binding, kinase activity, nucleotide binding, phosphoglycerate kinase activity, transferase activity                                                                | glycolysis                                                                                                              |
| septin 8                                                                  | 8-Sep          | NP_149156    | 50       | 2             | septin complex                                                                                      | GTP binding, nucleotide binding, protein binding                                                                                                                        | cell cycle                                                                                                              |

| Protein Name                                              | Gene Name | Accession No | Mw (kDa) | Peptide Count | GO Component                                                     | GO Function                                                                                                                                                                                                              | GO Process                                                                                                                                                                                                                                                                                                                                                                                                                      |
|-----------------------------------------------------------|-----------|--------------|----------|---------------|------------------------------------------------------------------|--------------------------------------------------------------------------------------------------------------------------------------------------------------------------------------------------------------------------|---------------------------------------------------------------------------------------------------------------------------------------------------------------------------------------------------------------------------------------------------------------------------------------------------------------------------------------------------------------------------------------------------------------------------------|
| aldehyde dehydrogenase family 1, subfamily A3             | Aldh1a3   | NP_444310    | 56       | 2             | cytoplasm                                                        | 3-chloroallyl aldehyde dehydrogenase activity, aldehyde dehydrogenase (NAD) activity, aldehyde dehydrogenase [NAD(P)+] activity, NAD binding, oxidoreductase activity, thyroid hormone binding                           | embryonic camera-type eye development, embryonic eye morphogenesis, face development, metabolic process, nucleus accumbens development, olfactory pit development, optic cup morphogenesis involved in camera-type eye development, oxidation reduction, positive regulation of apoptosis, positive regulation of retinoic acid receptor signaling pathway, retinoic acid biosynthetic process, retinoic acid metabolic process |
| glutaredoxin                                              | Glx       | NP_444338    | 12       | 2             | cytoplasm                                                        | electron carrier activity, protein disulfide oxidoreductase activity, protein-disulfide reductase (glutathione) activity                                                                                                 | cell redox homeostasis, electron transport chain, transport                                                                                                                                                                                                                                                                                                                                                                     |
| phosphatidylinositol-5-phosphate 4-kinase, type II, gamma | Pip4k2c   | NP_473438    | 47       | 2             | cytoplasm, membrane                                              | 1-phosphatidylinositol-5-phosphate 4-kinase activity, ATP binding, kinase activity, nucleotide binding, phosphatidylinositol phosphate kinase activity, transferase activity                                             | phosphatidylinositol metabolic process                                                                                                                                                                                                                                                                                                                                                                                          |
| glyoxylate reductase/hydroxypyruvate reductase            | Grhpr     | NP_525028    | 35       | 2             | not classified                                                   | binding, catalytic activity, cofactor binding, glyoxylate reductase (NADP) activity, NAD or NADH binding, oxidoreductase activity, oxidoreductase activity, acting on the CH-OH group of donors, NAD or NADP as acceptor | metabolic process, oxidation reduction                                                                                                                                                                                                                                                                                                                                                                                          |
| SH3 domain binding glutamic acid-rich protein-like 3      | Sh3bgr3   | NP_542126    | 10       | 2             | cytoplasm, nucleus                                               | electron carrier activity, protein disulfide oxidoreductase activity                                                                                                                                                     | cell redox homeostasis                                                                                                                                                                                                                                                                                                                                                                                                          |
| WD repeat domain 5                                        | Wdr5      | NP_543124    | 37       | 2             | histone methyltransferase complex, intracellular, nucleus        | protein binding                                                                                                                                                                                                          | skeletal system development                                                                                                                                                                                                                                                                                                                                                                                                     |
| acetyl-Coenzyme A acyltransferase 1                       | Acaa1a    | NP_570934    | 44       | 2             | peroxisome                                                       | acetyl-CoA C-acetyltransferase activity, acetyl-CoA C-acyltransferase activity, acyltransferase activity, catalytic activity, transferase activity, transferring acyl groups other than amino-acyl groups                | fatty acid metabolic process, lipid metabolic process, metabolic process                                                                                                                                                                                                                                                                                                                                                        |
| suppression of tumorigenicity 13                          | St13      | NP_598487    | 42       | 2             | cytoplasm                                                        | binding                                                                                                                                                                                                                  | not classified                                                                                                                                                                                                                                                                                                                                                                                                                  |
| glutaminyl-tRNA synthetase                                | Qars      | NP_598555    | 88       | 2             | aminoacyl-tRNA synthetase multienzyme complex                    | aminoacyl-tRNA ligase activity, ATP binding, glutamine-tRNA ligase activity, ligase activity, nucleotide binding, protein kinase binding, RNA binding                                                                    | anti-apoptosis, translation                                                                                                                                                                                                                                                                                                                                                                                                     |
| leucine rich repeat containing 59                         | Lrrc59    | NP_598568    | 35       | 2             | endoplasmic reticulum, integral to membrane, membrane, microsome | protein binding                                                                                                                                                                                                          | not classified                                                                                                                                                                                                                                                                                                                                                                                                                  |

| Protein Name                                                                       | Gene Name | Accession No | Mw (kDa) | Peptide Count | GO Component                                                                                               | GO Function                                                                                                                                                                                                                                                                                                                           | GO Process                                                                                                                                    |
|------------------------------------------------------------------------------------|-----------|--------------|----------|---------------|------------------------------------------------------------------------------------------------------------|---------------------------------------------------------------------------------------------------------------------------------------------------------------------------------------------------------------------------------------------------------------------------------------------------------------------------------------|-----------------------------------------------------------------------------------------------------------------------------------------------|
| PDZ-domain protein scribble                                                        | Scrib     | NP_598850    | 180      | 2             | basolateral plasma membrane, cytoplasm, membrane                                                           | protein binding                                                                                                                                                                                                                                                                                                                       | asymmetric protein localization, cell migration, mammary gland duct morphogenesis, morphogenesis of embryonic epithelium, positive chemotaxis |
| transmembrane protein 109                                                          | Tmem109   | NP_598903    | 26       | 2             | cellular_component, endoplasmic reticulum, integral to membrane, membrane, nucleus, sarcoplasmic reticulum | molecular_function                                                                                                                                                                                                                                                                                                                    | biological_process                                                                                                                            |
| aldehyde dehydrogenase family 7, member A1                                         | Aldh7a1   | NP_613066    | 56       | 2             | mitochondrion                                                                                              | L-aminoadipate-semialdehyde dehydrogenase activity, oxidoreductase activity                                                                                                                                                                                                                                                           | metabolic process, oxidation reduction                                                                                                        |
| 3-mercaptopyruvate sulfurtransferase                                               | Mpst      | NP_619611    | 33       | 2             | cytoplasm, mitochondrial inner membrane, mitochondrion                                                     | 3-mercaptopyruvate sulfurtransferase activity, thiosulfate sulfurtransferase activity, transferase activity                                                                                                                                                                                                                           | sulfate transport                                                                                                                             |
| UDP-N-acetyl-alpha-D-galactosamine:polypeptide N-acetylgalactosaminyltransferase 2 | Galnt2    | NP_644678    | 65       | 2             | extracellular region, Golgi apparatus, Golgi lumen, integral to membrane, membrane                         | calcium ion binding, manganese ion binding, polypeptide N-acetylgalactosaminyltransferase activity, sugar binding, transferase activity, transferring glycosyl groups                                                                                                                                                                 | protein amino acid O-linked glycosylation                                                                                                     |
| biliverdin reductase B (flavin reductase (NADPH))                                  | Blvrb     | NP_659172    | 22       | 2             | cytoplasm                                                                                                  | biliverdin reductase activity, binding, catalytic activity, coenzyme binding, flavin reductase activity, oxidoreductase activity                                                                                                                                                                                                      | cellular metabolic process, metabolic process, oxidation reduction                                                                            |
| serine/threonine protein kinase 24                                                 | Stk24     | NP_663440    | 48       | 2             | cytoplasm                                                                                                  | ATP binding, kinase activity, nucleotide binding, protein kinase activity, protein serine/threonine kinase activity, transferase activity                                                                                                                                                                                             | protein amino acid phosphorylation                                                                                                            |
| methionine adenosyltransferase II, alpha                                           | Mat2a     | NP_663544    | 44       | 2             | not classified                                                                                             | ATP binding, cobalt ion binding, magnesium ion binding, metal ion binding, methionine adenosyltransferase activity, nucleotide binding, potassium ion binding, transferase activity                                                                                                                                                   | one-carbon metabolic process, S-adenosylmethionine biosynthetic process                                                                       |
| carbonic reductase 4                                                               | Cbr4      | NP_663570    | 25       | 2             | cytoplasm                                                                                                  | binding, catalytic activity, oxidoreductase activity                                                                                                                                                                                                                                                                                  | metabolic process, oxidation reduction                                                                                                        |
| polymerase (RNA) II (DNA directed) polypeptide H                                   | Polr2h    | NP_663607    | 17       | 2             | nucleus                                                                                                    | DNA-directed RNA polymerase activity                                                                                                                                                                                                                                                                                                  | transcription                                                                                                                                 |
| histone cluster 1, H1d                                                             | Hist1h1d  | NP_663759    | 22       | 2             | chromosome, nucleosome, nucleus                                                                            | DNA binding, protein binding                                                                                                                                                                                                                                                                                                          | nucleosome assembly, nucleosome positioning                                                                                                   |
| chromodomain helicase DNA binding protein 4                                        | Chd4      | NP_666091    | 218      | 2             | chromatin, nucleus                                                                                         | ATP binding, ATP-dependent helicase activity, chromatin binding, DNA binding, helicase activity, hydrolase activity, hydrolase activity, acting on acid anhydrides, in phosphorus-containing anhydrides, metal ion binding, nucleic acid binding, nucleotide binding, protein binding, transcription factor binding, zinc ion binding | chromatin assembly or disassembly, chromatin modification, regulation of transcription, transcription                                         |

| Protein Name                                                        | Gene Name      | Accession No | Mw (kDa) | Peptide Count | GO Component                                                                                                                            | GO Function                                                                                                                            | GO Process                                                                                                                                                      |
|---------------------------------------------------------------------|----------------|--------------|----------|---------------|-----------------------------------------------------------------------------------------------------------------------------------------|----------------------------------------------------------------------------------------------------------------------------------------|-----------------------------------------------------------------------------------------------------------------------------------------------------------------|
| 3-hydroxyisobutyryl-Coenzyme A hydrolase                            | Hibch          | NP_666220    | 43       | 2             | mitochondrion                                                                                                                           | 3-hydroxyisobutyryl-CoA hydrolase activity, catalytic activity, hydrolase activity                                                     | branched chain family amino acid catabolic process, metabolic process                                                                                           |
| thyroid hormone receptor associated protein 3                       | Thrap3         | NP_666265    | 108      | 2             | mediator complex, nucleus                                                                                                               | ATP binding, nucleotide binding, receptor activity, transcription coactivator activity                                                 | positive regulation of transcription from RNA polymerase II promoter, regulation of transcription, transcription, transcription from RNA polymerase II promoter |
| actin-related protein 2                                             | Actr2          | NP_666355    | 45       | 2             | cell projection, cytoplasm, cytoskeleton                                                                                                | actin binding, ATP binding, nucleotide binding, protein binding                                                                        | not classified                                                                                                                                                  |
| 4-hydroxyphenylpyruvate dioxygenase-like                            | Hpd1           | NP_666368    | 40       | 2             | not classified                                                                                                                          | 4-hydroxyphenylpyruvate dioxygenase activity                                                                                           | aromatic amino acid family metabolic process                                                                                                                    |
| ubiquitin specific peptidase 9, Y chromosome                        | Usp9y          | NP_683745    | 292      | 2             | not classified                                                                                                                          | cysteine-type peptidase activity, hydrolase activity, peptidase activity, ubiquitin thioesterase activity                              | modification-dependent protein catabolic process                                                                                                                |
| brain glycogen phosphorylase                                        | Pygb           | NP_722476    | 97       | 2             | axon                                                                                                                                    | phosphorylase activity, pyridoxal phosphate binding, transferase activity, transferase activity, transferring glycosyl groups          | carbohydrate metabolic process, glycogen metabolic process                                                                                                      |
| pyridoxal (pyridoxine, vitamin B6) kinase                           | Pdxk           | NP_742146    | 35       | 2             | cytoplasm                                                                                                                               | ATP binding, kinase activity, metal ion binding, nucleotide binding, pyridoxal kinase activity, transferase activity, zinc ion binding | pyridoxine biosynthetic process                                                                                                                                 |
| hypothetical protein LOC230249                                      | AI314180       | NP_759013    | 204      | 2             | endoplasmic reticulum, endosome, nucleus, proteasome complex                                                                            | binding                                                                                                                                | not classified                                                                                                                                                  |
| hypothetical protein LOC68832                                       | 1110057K04 Rik | NP_765989    | 37       | 2             | not classified                                                                                                                          | not classified                                                                                                                         | not classified                                                                                                                                                  |
| solute carrier family 25 (mitochondrial carrier, Aralar), member 12 | Slc25a12       | NP_766024    | 75       | 2             | integral to membrane, membrane, mitochondrial inner membrane, mitochondrion                                                             | binding, calcium ion binding, transporter activity                                                                                     | malate-aspartate shuttle, transport                                                                                                                             |
| sushi, nidogen and EGF-like domains 1                               | Sned1          | NP_766051    | 152      | 2             | not classified                                                                                                                          | calcium ion binding                                                                                                                    | cell-matrix adhesion                                                                                                                                            |
| translocase of outer mitochondrial membrane 22 homolog              | Tomm22         | NP_766197    | 16       | 2             | integral to membrane, membrane, mitochondrial inner membrane, mitochondrial outer membrane, mitochondrion                               | receptor activity                                                                                                                      | protein transport, transmembrane transport, transport                                                                                                           |
| pogo transposable element with ZNF domain                           | Pogz           | NP_766271    | 155      | 2             | intracellular, nucleus                                                                                                                  | DNA binding, metal ion binding, nucleic acid binding, zinc ion binding                                                                 | multicellular organismal development, regulation of transcription                                                                                               |
| splicing factor, arginine/serine-rich 1 isoform 1                   | Sfrs1          | NP_775550    | 28       | 2             | cytoplasm, nucleus, spliceosomal complex                                                                                                | nucleic acid binding, nucleotide binding, RNA binding, RS domain binding                                                               | cardiac muscle contraction, in utero embryonic development, mRNA processing, RNA splicing                                                                       |
| ATPase, H <sup>+</sup> transporting, V0 subunit D isoform 2         | Atp6v0d2       | NP_780615    | 40       | 2             | early endosome, proton-transporting two-sector ATPase complex, proton-transporting domain, proton-transporting V-type ATPase, V0 domain | hydrogen ion transmembrane transporter activity                                                                                        | ATP synthesis coupled proton transport, ion transport, proton transport, transport                                                                              |
| hypothetical protein LOC319675                                      | 5830418K08 Rik | NP_795950    | 269      | 2             | not classified                                                                                                                          | not classified                                                                                                                         | not classified                                                                                                                                                  |

| Protein Name                                                                               | Gene Name    | Accession No | Mw (kDa) | Peptide Count | GO Component                                                                           | GO Function                                                                                                                                                              | GO Process                                                                                                                                                                                                                                                                                                   |
|--------------------------------------------------------------------------------------------|--------------|--------------|----------|---------------|----------------------------------------------------------------------------------------|--------------------------------------------------------------------------------------------------------------------------------------------------------------------------|--------------------------------------------------------------------------------------------------------------------------------------------------------------------------------------------------------------------------------------------------------------------------------------------------------------|
| myosin IIIB                                                                                | Myo3b        | NP_796350    | 151      | 2             | cytoplasm, cytoskeleton, myosin complex                                                | actin binding, ATP binding, kinase activity, motor activity, nucleotide binding, protein kinase activity, protein serine/threonine kinase activity, transferase activity | protein amino acid phosphorylation, response to stimulus, visual perception                                                                                                                                                                                                                                  |
| myosin ID                                                                                  | Myo1d        | NP_796364    | 116      | 2             | myosin complex                                                                         | actin binding, ATP binding, calmodulin binding, motor activity, nucleotide binding                                                                                       | not classified                                                                                                                                                                                                                                                                                               |
| ATPase, H <sup>+</sup> transporting, lysosomal V1 subunit G3                               | Atp6v1g3     | NP_796371    | 14       | 2             | cytosol, membrane, plasma membrane, vacuolar proton-transporting V-type ATPase complex | hydrogen-exporting ATPase activity, phosphorylative mechanism, hydrolase activity, acting on acid anhydrides, catalyzing transmembrane movement of substances            | ATP hydrolysis coupled proton transport, ion transport, proton transport, transport                                                                                                                                                                                                                          |
| amplified in osteosarcoma                                                                  | Os9          | NP_808282    | 70       | 2             | not classified                                                                         | not classified                                                                                                                                                           | not classified                                                                                                                                                                                                                                                                                               |
| ROD1 regulator of differentiation 1 isoform 2                                              | Rod1         | NP_835458    | 57       | 2             | nucleus                                                                                | nucleic acid binding, nucleotide binding, RNA binding                                                                                                                    | mRNA processing                                                                                                                                                                                                                                                                                              |
| cystathionine beta-synthase isoform 2                                                      | Cbs          | NP_835742    | 60       | 2             | cytoplasm, nucleus                                                                     | catalytic activity, cystathionine beta-synthase activity, iron ion binding, lyase activity, metal ion binding, pyridoxal phosphate binding                               | cellular amino acid biosynthetic process, cysteine biosynthetic process, cysteine biosynthetic process from serine, cysteine biosynthetic process via cystathionine, endochondral ossification, homocysteine metabolic process, metabolic process, regulation of JUN kinase activity, response to folic acid |
| eukaryotic translation initiation factor 5A                                                | Eif5a        | NP_853613    | 17       | 2             | cytoplasm, endoplasmic reticulum, membrane, nuclear pore, nucleus                      | ribosome binding, RNA binding, translation elongation factor activity                                                                                                    | apoptosis, mRNA transport, peptidyl-lysine modification to hypusine, positive regulation of translational elongation, positive regulation of translational termination, protein transport, translation, translational frameshifting, transmembrane transport, transport                                      |
| NADH dehydrogenase subunit 1                                                               | ND1          | NP_904328    | 36       | 2             | integral to membrane, mitochondrion                                                    | NADH dehydrogenase (ubiquinone) activity, oxidoreductase activity                                                                                                        | oxidation reduction                                                                                                                                                                                                                                                                                          |
| heterogeneous nuclear ribonucleoprotein A3 isoform a                                       | Hnrnpa3      | NP_932758    | 40       | 2             | nucleus, ribonucleoprotein complex, spliceosomal complex                               | nucleic acid binding, nucleotide binding, RNA binding                                                                                                                    | mRNA processing, RNA splicing                                                                                                                                                                                                                                                                                |
| mitochondrial ribosomal protein S26                                                        | Mrps26       | NP_997090    | 23       | 2             | mitochondrion, ribonucleoprotein complex, ribosome                                     | not classified                                                                                                                                                           | not classified                                                                                                                                                                                                                                                                                               |
| PREDICTED: thyroid hormone receptor interactor 11 isoform 3                                | Trip11       | XP_001001171 | 226      | 2             | not classified                                                                         | receptor activity                                                                                                                                                        | not classified                                                                                                                                                                                                                                                                                               |
| PREDICTED: similar to 3-methylcrotonyl-CoA carboxylase alpha subunit                       | LOC677576    | XP_001005025 | 28       | 2             | not classified                                                                         | not classified                                                                                                                                                           | not classified                                                                                                                                                                                                                                                                                               |
| PREDICTED: hypothetical protein                                                            | LOC100048803 | XP_001471667 | 22       | 2             | cytoplasm, nucleus, proteasome complex, proteasome core complex                        | endopeptidase activity, hydrolase activity, peptidase activity, threonine-type endopeptidase activity                                                                    | proteolysis involved in cellular protein catabolic process                                                                                                                                                                                                                                                   |
| PREDICTED: hypothetical protein isoform 2                                                  | LOC100039257 | XP_001472723 | 15       | 2             | not classified                                                                         | not classified                                                                                                                                                           | not classified                                                                                                                                                                                                                                                                                               |
| PREDICTED: similar to ribosomal protein S8 isoform 2                                       | LOC100040298 | XP_001474171 | 24       | 2             | not classified                                                                         | not classified                                                                                                                                                           | not classified                                                                                                                                                                                                                                                                                               |
| PREDICTED: similar to nuclear pore complex-associated intranuclear coiled-coil protein TPR | LOC100043998 | XP_001474187 | 149      | 2             | not classified                                                                         | not classified                                                                                                                                                           | not classified                                                                                                                                                                                                                                                                                               |

| Protein Name                                                               | Gene Name     | Accession No | Mw (kDa) | Peptide Count | GO Component                                                                                   | GO Function                                                                                       | GO Process                                                                                                                                                            |
|----------------------------------------------------------------------------|---------------|--------------|----------|---------------|------------------------------------------------------------------------------------------------|---------------------------------------------------------------------------------------------------|-----------------------------------------------------------------------------------------------------------------------------------------------------------------------|
| PREDICTED: similar to 22 kDa neuronal tissue-enriched acidic protein       | LOC100045716  | XP_001474846 | 11       | 2             | not classified                                                                                 | not classified                                                                                    | not classified                                                                                                                                                        |
| PREDICTED: hypothetical protein                                            | LOC100040970  | XP_001475621 | 24       | 2             | ribosome                                                                                       | not classified                                                                                    | not classified                                                                                                                                                        |
| PREDICTED: hypothetical protein                                            | LOC100047609  | XP_001479061 | 70       | 2             | not classified                                                                                 | not classified                                                                                    | not classified                                                                                                                                                        |
| PREDICTED: similar to 60S ribosomal protein L9 isoform 1                   | LOC100048162  | XP_001480029 | 22       | 2             | not classified                                                                                 | not classified                                                                                    | not classified                                                                                                                                                        |
| PREDICTED: similar to Rab5B                                                | LOC433464     | XP_485050    | 22       | 2             | not classified                                                                                 | not classified                                                                                    | not classified                                                                                                                                                        |
| PREDICTED: hypothetical protein                                            | EG665562      | XP_915749    | 14       | 2             | not classified                                                                                 | not classified                                                                                    | not classified                                                                                                                                                        |
| PREDICTED: similar to Snrpf protein                                        | Snrpf         | XP_919276    | 23       | 2             | nucleus, ribonucleoprotein complex, spliceosomal complex                                       | RNA binding                                                                                       | mRNA processing, RNA splicing                                                                                                                                         |
| PREDICTED: hypothetical protein isoform 2                                  | LOC637555     | XP_929443    | 19       | 2             | not classified                                                                                 | not classified                                                                                    | not classified                                                                                                                                                        |
| PREDICTED: NADH dehydrogenase (ubiquinone) 1 alpha subcomplex 11 isoform 6 | Ndufa11       | XP_930081    | 15       | 2             | integral to membrane, membrane, mitochondrial inner membrane, mitochondrion, respiratory chain | protein transporter activity                                                                      | electron transport chain, protein transport, transport                                                                                                                |
| PREDICTED: similar to hCG1816075                                           | 1700027A15Rik | XP_989739    | 10       | 2             | not classified                                                                                 | not classified                                                                                    | not classified                                                                                                                                                        |
| PREDICTED: similar to zeta proteasome chain; PSMA5                         | LOC676113     | XP_992657    | 26       | 2             | not classified                                                                                 | not classified                                                                                    | not classified                                                                                                                                                        |
| hypothetical protein LOC407819                                             | BC031181      | NP_001001181 | 8        | 1             | not classified                                                                                 | not classified                                                                                    | not classified                                                                                                                                                        |
| tropomyosin 4                                                              | Tpm4          | NP_001001491 | 28       | 1             | cortical cytoskeleton, cytoplasm, cytoskeleton, filamentous actin, podosome                    | actin binding, calcium ion binding, metal ion binding                                             | not classified                                                                                                                                                        |
| nucleoporin 85                                                             | Nup85         | NP_001002929 | 75       | 1             | cytoplasm, membrane, nuclear pore, nucleus, plasma membrane                                    | CCR2 chemokine receptor binding                                                                   | chemotaxis, cytokine-mediated signaling pathway, lamellipodium assembly, macrophage chemotaxis, mRNA transport, protein transport, transmembrane transport, transport |
| type II keratin Kb14                                                       | EG406223      | NP_001003670 | 60       | 1             | intermediate filament                                                                          | not classified                                                                                    | not classified                                                                                                                                                        |
| Rho guanine nucleotide exchange factor (GEF) 11                            | Arhgef11      | NP_001003912 | 172      | 1             | cytoplasm                                                                                      | G-protein-coupled receptor binding                                                                | G-protein coupled receptor protein signaling pathway                                                                                                                  |
| hypothetical protein LOC237730                                             | A1595406      | NP_001004147 | 33       | 1             | nucleus, ribonucleoprotein complex                                                             | methyltransferase activity, RNA binding, transferase activity                                     | rRNA processing, tRNA processing                                                                                                                                      |
| zinc finger protein 366                                                    | Zfp366        | NP_001004149 | 85       | 1             | nucleus                                                                                        | not classified                                                                                    | not classified                                                                                                                                                        |
| signal peptide, CUB domain, EGF-like 3                                     | Scube3        | NP_001004366 | 109      | 1             | extracellular region                                                                           | calcium ion binding                                                                               | not classified                                                                                                                                                        |
| eukaryotic translation initiation factor 2A                                | Eif2a         | NP_001005509 | 64       | 1             | not classified                                                                                 | translation initiation factor activity                                                            | positive regulation of signal transduction, protein amino acid phosphorylation, regulation of translation, SREBP-mediated signaling pathway, translation              |
| pyruvate dehydrogenase phosphatase isoenzyme 2                             | 4833426J09Rik | NP_001019777 | 60       | 1             | not classified                                                                                 | hydrolase activity, magnesium ion binding, metal ion binding, phosphoprotein phosphatase activity | not classified                                                                                                                                                        |
| Rho GTPase activating protein 15 isoform 2                                 | Arhgap15      | NP_001020548 | 21       | 1             | cytoplasm, intracellular, membrane                                                             | GTPase activator activity, protein binding, Rac GTPase activator activity                         | regulation of cell shape, signal transduction                                                                                                                         |
| hypothetical protein LOC207806                                             | Gm608         | NP_001025060 | 237      | 1             | not classified                                                                                 | not classified                                                                                    | not classified                                                                                                                                                        |
| UDP-N-acetylglucosamine pyrophosphorylase 1-like 1                         | Uap111        | NP_001028465 | 57       | 1             | not classified                                                                                 | nucleotidyltransferase activity, transferase activity                                             | metabolic process                                                                                                                                                     |
| coiled-coil domain containing 61                                           | Ccdc61        | NP_001028486 | 57       | 1             | not classified                                                                                 | not classified                                                                                    | not classified                                                                                                                                                        |
| hypothetical protein LOC241694                                             | A230067G21Rik | NP_001028520 | 214      | 1             | cytoplasm, intracellular                                                                       | GTPase activator activity                                                                         | regulation of small GTPase mediated signal transduction                                                                                                               |
| zinc finger and SCAN domains 10                                            | Zscan10       | NP_001028597 | 88       | 1             | cellular_component, nucleus                                                                    | metal ion binding, molecular_function, zinc ion binding                                           | biological_process, regulation of transcription, transcription                                                                                                        |
| hypothetical protein LOC432613                                             | 4933422H20Rik | NP_001028947 | 71       | 1             | not classified                                                                                 | metal ion binding, zinc ion binding                                                               | not classified                                                                                                                                                        |
| tubulin, alpha-like 3                                                      | Tubal3        | NP_001029051 | 50       | 1             | microtubule, protein complex                                                                   | GTP binding, GTPase activity, nucleotide binding, structural molecule activity                    | microtubule-based movement, microtubule-based process, protein polymerization                                                                                         |



| Protein Name                                         | Gene Name | Accession No | Mw (kDa) | Peptide Count | GO Component                                                                | GO Function                                                                                                                                                                                                                                                       | GO Process                                                                                                                                                                                                                                                                                                                                                                                                                                                                                                 |
|------------------------------------------------------|-----------|--------------|----------|---------------|-----------------------------------------------------------------------------|-------------------------------------------------------------------------------------------------------------------------------------------------------------------------------------------------------------------------------------------------------------------|------------------------------------------------------------------------------------------------------------------------------------------------------------------------------------------------------------------------------------------------------------------------------------------------------------------------------------------------------------------------------------------------------------------------------------------------------------------------------------------------------------|
| dynamamin 3 isoform 1                                | Dnm3      | NP_001033708 | 97       | 1             | cytoplasm, cytoskeleton, microtubule, mitochondrion                         | GTP binding, GTPase activity, hydrolase activity, molecular_function, motor activity, nucleotide binding                                                                                                                                                          | biological_process, endocytosis                                                                                                                                                                                                                                                                                                                                                                                                                                                                            |
| mitogen activated protein kinase 1                   | Mapk1     | NP_001033752 | 41       | 1             | cytoplasm, cytosol, nucleus                                                 | ATP binding, kinase activity, MAP kinase 2 activity, MAP kinase activity, nucleotide binding, phosphotyrosine binding, protein binding, protein kinase activity, protein serine/threonine kinase activity, transcription regulator activity, transferase activity | B cell receptor signaling pathway, cell cycle, cytosine metabolic process, labyrinthine layer blood vessel development, lipopolysaccharide-mediated signaling pathway, MAPKKK cascade, negative regulation of cell differentiation, organ morphogenesis, peptidyl-serine phosphorylation, protein amino acid phosphorylation, regulation of transcription factor activity, response to DNA damage stimulus, response to exogenous dsRNA, response to lipopolysaccharide, T cell receptor signaling pathway |
| sec13-like protein isoform a                         | Seh1l     | NP_001034177 | 40       | 1             | nuclear pore, nucleus                                                       | not classified                                                                                                                                                                                                                                                    | cell cycle, cell division, chromosome segregation, mitosis, mRNA transport, protein transport, transmembrane transport, transport                                                                                                                                                                                                                                                                                                                                                                          |
| TRIO and F-actin binding protein isoform 3           | Triobp    | NP_001034245 | 223      | 1             | cellular_component, cytoplasm, cytoskeleton, nucleus                        | actin binding, molecular_function                                                                                                                                                                                                                                 | biological_process                                                                                                                                                                                                                                                                                                                                                                                                                                                                                         |
| cytoplasmic linker 2 isoform b                       | Clip2     | NP_001034251 | 112      | 1             | cytoplasm, cytoplasmic microtubule, cytoskeleton, microtubule               | protein binding                                                                                                                                                                                                                                                   | not classified                                                                                                                                                                                                                                                                                                                                                                                                                                                                                             |
| nucleolar and coiled-body phosphoprotein 1 isoform D | Nolc1     | NP_001034442 | 74       | 1             | Cajal body, nucleolus, nucleoplasm, small nuclear ribonucleoprotein complex | protein binding                                                                                                                                                                                                                                                   | nucleolus organization                                                                                                                                                                                                                                                                                                                                                                                                                                                                                     |
| La ribonucleoprotein domain family, member 2         | Larp2     | NP_001035489 | 39       | 1             | ribonucleoprotein complex                                                   | nucleic acid binding                                                                                                                                                                                                                                              | not classified                                                                                                                                                                                                                                                                                                                                                                                                                                                                                             |
| thioredoxin reductase 1 isoform 1                    | Txnrd1    | NP_001035988 | 67       | 1             | cytoplasm, cytosol, nucleus                                                 | FAD binding, NADP or NADPH binding, oxidoreductase activity, selenium binding, thioredoxin-disulfide reductase activity                                                                                                                                           | cell proliferation, cell redox homeostasis, gastrulation, mesoderm formation, oxidation reduction                                                                                                                                                                                                                                                                                                                                                                                                          |
| DEAH (Asp-Glu-Ala-His) box polypeptide 15 isoform 1  | Dhx15     | NP_001036085 | 80       | 1             | nucleus                                                                     | ATP binding, ATP-dependent helicase activity, helicase activity, hydrolase activity, nucleic acid binding, nucleoside-triphosphatase activity, nucleotide binding                                                                                                 | mRNA processing, RNA splicing                                                                                                                                                                                                                                                                                                                                                                                                                                                                              |
| interleukin enhancer binding factor 3 isoform 4      | Ilf3      | NP_001036174 | 76       | 1             | intracellular, nucleus                                                      | DNA binding, double-stranded RNA binding, protein binding, RNA binding                                                                                                                                                                                            | protein amino acid methylation, regulation of transcription, transcription                                                                                                                                                                                                                                                                                                                                                                                                                                 |

| Protein Name                                                              | Gene Name | Accession No | Mw (kDa) | Peptide Count | GO Component                                                                                    | GO Function                                                                                                                                                                | GO Process                                                                                                                                                                                                                                                                                                                                                                                                                                                                                                                                                                                                              |
|---------------------------------------------------------------------------|-----------|--------------|----------|---------------|-------------------------------------------------------------------------------------------------|----------------------------------------------------------------------------------------------------------------------------------------------------------------------------|-------------------------------------------------------------------------------------------------------------------------------------------------------------------------------------------------------------------------------------------------------------------------------------------------------------------------------------------------------------------------------------------------------------------------------------------------------------------------------------------------------------------------------------------------------------------------------------------------------------------------|
| glutaryl-Coenzyme A dehydrogenase                                         | Gcdh      | NP_001038209 | 49       | 1             | mitochondrial inner membrane, mitochondrion                                                     | acyl-CoA dehydrogenase activity, electron carrier activity, FAD binding, glutaryl-CoA dehydrogenase activity, oxidoreductase activity, acting on the CH-CH group of donors | metabolic process, oxidation reduction                                                                                                                                                                                                                                                                                                                                                                                                                                                                                                                                                                                  |
| clathrin interactor 1                                                     | Clint1    | NP_001038985 | 68       | 1             | cytoplasm, cytoplasmic vesicle, membrane                                                        | lipid binding, protein binding                                                                                                                                             | endocytosis                                                                                                                                                                                                                                                                                                                                                                                                                                                                                                                                                                                                             |
| cofactor required for Sp1 transcriptional activation, subunit 2 isoform a | Med14     | NP_001041673 | 161      | 1             | mediator complex, nucleus                                                                       | protein binding, RNA polymerase II transcription mediator activity, transcription coactivator activity                                                                     | positive regulation of transcription from RNA polymerase II promoter, regulation of transcription, regulation of transcription from RNA polymerase II promoter, transcription                                                                                                                                                                                                                                                                                                                                                                                                                                           |
| GNAS complex locus isoform g                                              | Gnas      | NP_001070978 | 44       | 1             | cell projection, heterotrimeric G-protein complex, membrane, membrane fraction, plasma membrane | GTP binding, GTPase activity, guanyl nucleotide binding, nucleotide binding, protein binding, signal transducer activity                                                   | activation of adenylate cyclase activity by dopamine receptor signaling pathway, activation of adenylate cyclase activity by G-protein signaling pathway, cartilage development, embryonic cranial skeleton morphogenesis, embryonic hindlimb morphogenesis, endochondral ossification, energy reserve metabolic process, G-protein coupled receptor protein signaling pathway, positive regulation of osteoblast differentiation, positive regulation of osteoclast differentiation, post-embryonic body morphogenesis, post-embryonic development, response to drug, signal transduction, skeletal system development |

| Protein Name                                                                  | Gene Name      | Accession No | Mw (kDa) | Peptide Count | GO Component                                           | GO Function                                                                                                                                                                                                                            | GO Process                                                                                                                                                                                                                                                                                                                                                                                                                                                                                                                                                                                   |
|-------------------------------------------------------------------------------|----------------|--------------|----------|---------------|--------------------------------------------------------|----------------------------------------------------------------------------------------------------------------------------------------------------------------------------------------------------------------------------------------|----------------------------------------------------------------------------------------------------------------------------------------------------------------------------------------------------------------------------------------------------------------------------------------------------------------------------------------------------------------------------------------------------------------------------------------------------------------------------------------------------------------------------------------------------------------------------------------------|
| protein tyrosine phosphatase, non-receptor type 6 isoform b                   | Ptpn6          | NP_001071173 | 68       | 1             | alpha-beta T cell receptor complex, cytoplasm, nucleus | hydrolase activity, phosphatase activity, phosphoprotein phosphatase activity, phosphotyrosine binding, protein binding, protein tyrosine phosphatase activity, SH2 domain binding, SH3 domain binding                                 | B cell receptor signaling pathway, cytokine-mediated signaling pathway, dephosphorylation, intracellular signaling cascade, natural killer cell mediated cytotoxicity, negative regulation of humoral immune response mediated by circulating immunoglobulin, negative regulation of MAP kinase activity, negative regulation of MAPKKK cascade, negative regulation of peptidyl-tyrosine phosphorylation, negative regulation of T cell proliferation, negative regulation of T cell receptor signaling pathway, protein amino acid dephosphorylation, regulation of B cell differentiation |
| hypothetical protein LOC74854                                                 | 4930402F06 Rik | NP_001074178 | 40       | 1             | not classified                                         | transferase activity, transferase activity, transferring glycosyl groups                                                                                                                                                               | not classified                                                                                                                                                                                                                                                                                                                                                                                                                                                                                                                                                                               |
| general transcription factor II I isoform 5                                   | Gtf2i          | NP_001074218 | 108      | 1             | cell projection, cell soma, cytoplasm, nucleus         | DNA binding, mitogen-activated protein kinase binding                                                                                                                                                                                  | embryonic development, regulation of transcription, transcription                                                                                                                                                                                                                                                                                                                                                                                                                                                                                                                            |
| Ras-GTPase-activating protein (GAP120) SH3-domain binding protein 2 isoform a | G3bp2          | NP_001074266 | 54       | 1             | cellular_component, intracellular                      | nucleic acid binding, nucleotide binding, protein binding, RNA binding                                                                                                                                                                 | mRNA transport, small GTPase mediated signal transduction, transport                                                                                                                                                                                                                                                                                                                                                                                                                                                                                                                         |
| gastric inhibitory polypeptide receptor                                       | Gipr           | NP_001074284 | 53       | 1             | integral to membrane, membrane, plasma membrane        | gastric inhibitory peptide receptor activity, G-protein coupled receptor activity, receptor activity, signal transducer activity, transmembrane receptor activity                                                                      | cell surface receptor linked signal transduction, G-protein coupled receptor protein signaling pathway, neuropeptide signaling pathway, signal transduction                                                                                                                                                                                                                                                                                                                                                                                                                                  |
| PDZ domain containing 2                                                       | Pdzd2          | NP_001074533 | 297      | 1             | cell junction                                          | protein binding                                                                                                                                                                                                                        | not classified                                                                                                                                                                                                                                                                                                                                                                                                                                                                                                                                                                               |
| ankyrin repeat domain 26                                                      | Ankrd26        | NP_001074581 | 192      | 1             | actin filament                                         | molecular_function                                                                                                                                                                                                                     | negative regulation of multicellular organism growth, negative regulation of organ growth, regulation of fatty acid metabolic process, regulation of feeding behavior, regulation of lipid metabolic process                                                                                                                                                                                                                                                                                                                                                                                 |
| dehydrogenase E1 and transketolase domain containing 1                        | Dhtkd1         | NP_001074600 | 103      | 1             | cellular_component, mitochondrion                      | molecular_function, oxidoreductase activity, oxidoreductase activity, acting on the aldehyde or oxo group of donors, disulfide as acceptor, oxoglutarate dehydrogenase (succinyl-)transferring activity, thiamin pyrophosphate binding | biological_process, glycolysis, metabolic process, oxidation reduction                                                                                                                                                                                                                                                                                                                                                                                                                                                                                                                       |

| Protein Name                                             | Gene Name      | Accession No | Mw (kDa) | Peptide Count | GO Component                                                                                                                                           | GO Function                                                                                                                                                                                                  | GO Process                                                                                                                                                                                                                                                                                                                                                                                                                                                                                                                                                    |
|----------------------------------------------------------|----------------|--------------|----------|---------------|--------------------------------------------------------------------------------------------------------------------------------------------------------|--------------------------------------------------------------------------------------------------------------------------------------------------------------------------------------------------------------|---------------------------------------------------------------------------------------------------------------------------------------------------------------------------------------------------------------------------------------------------------------------------------------------------------------------------------------------------------------------------------------------------------------------------------------------------------------------------------------------------------------------------------------------------------------|
| laminin, alpha 5                                         | Lama5          | NP_001074640 | 404      | 1             | basal lamina, basement membrane, extracellular matrix, extracellular region, laminin-1 complex, laminin-10 complex, proteinaceous extracellular matrix | integrin binding, protein binding, receptor binding                                                                                                                                                          | branching involved in salivary gland morphogenesis, branching involved in ureteric bud morphogenesis, branching morphogenesis of a tube, cell adhesion, cilium assembly, hair follicle development, lung development, morphogenesis of a polarized epithelium, morphogenesis of embryonic epithelium, muscle organ development, neural crest cell migration, odontogenesis of dentine-containing tooth, organ morphogenesis, regulation of cell adhesion, regulation of cell migration, regulation of cell proliferation, regulation of embryonic development |
| phosphatidylinositol glycan anchor biosynthesis, class G | Pigg           | NP_001074703 | 108      | 1             | endoplasmic reticulum                                                                                                                                  | CP2 mannose-ethanolamine phosphotransferase activity, protein binding                                                                                                                                        | GPI anchor biosynthetic process                                                                                                                                                                                                                                                                                                                                                                                                                                                                                                                               |
| p53-associated parkin-like cytoplasmic protein           | Parc           | NP_001074804 | 281      | 1             | anaphase-promoting complex, cullin-RING ubiquitin ligase complex, cytoplasm                                                                            | ATP binding, metal ion binding, nucleotide binding, protein binding, ubiquitin protein ligase binding, zinc ion binding                                                                                      | modification-dependent protein catabolic process, regulation of mitotic metaphase/anaphase transition, ubiquitin-dependent protein catabolic process                                                                                                                                                                                                                                                                                                                                                                                                          |
| kinase D-interacting substrate of 220 kDa                | C330002119 Rik | NP_001074847 | 199      | 1             | not classified                                                                                                                                         | not classified                                                                                                                                                                                               | not classified                                                                                                                                                                                                                                                                                                                                                                                                                                                                                                                                                |
| unc-13 homolog B                                         | Unc13b         | NP_001074882 | 182      | 1             | cell junction, cellular_component, cytoplasm, Golgi apparatus, membrane, synapse                                                                       | diacylglycerol binding, metal ion binding, non-kinase phorbol ester receptor activity, zinc ion binding                                                                                                      | exocytosis, intracellular signaling cascade, synaptic transmission, synaptic vesicle priming                                                                                                                                                                                                                                                                                                                                                                                                                                                                  |
| hypothetical protein LOC665775                           | A230054D04 Rik | NP_001074891 | 327      | 1             | not classified                                                                                                                                         | not classified                                                                                                                                                                                               | not classified                                                                                                                                                                                                                                                                                                                                                                                                                                                                                                                                                |
| hypothetical protein LOC100039834                        | LOC100039834   | NP_001092785 | 24       | 1             | not classified                                                                                                                                         | not classified                                                                                                                                                                                               | not classified                                                                                                                                                                                                                                                                                                                                                                                                                                                                                                                                                |
| transmembrane protein 22                                 | Tmem22         | NP_001094953 | 46       | 1             | not classified                                                                                                                                         | not classified                                                                                                                                                                                               | not classified                                                                                                                                                                                                                                                                                                                                                                                                                                                                                                                                                |
| pleckstrin homology-like domain, family B, member 3      | Phldb3         | NP_001096083 | 73       | 1             | not classified                                                                                                                                         | not classified                                                                                                                                                                                               | not classified                                                                                                                                                                                                                                                                                                                                                                                                                                                                                                                                                |
| cellular nucleic acid binding protein isoform 3          | Cnbp           | NP_001103216 | 19       | 1             | cytoplasm, cytosol, endoplasmic reticulum, nucleus                                                                                                     | DNA binding, metal ion binding, nucleic acid binding, zinc ion binding                                                                                                                                       | positive regulation of cell proliferation, positive regulation of transcription from RNA polymerase II promoter, regulation of transcription, transcription                                                                                                                                                                                                                                                                                                                                                                                                   |
| hypothetical protein LOC619288                           | 4933417M04 Rik | NP_001103229 | 64       | 1             | not classified                                                                                                                                         | not classified                                                                                                                                                                                               | not classified                                                                                                                                                                                                                                                                                                                                                                                                                                                                                                                                                |
| acid phosphatase 1, soluble isoform 1                    | Acp1           | NP_001103709 | 18       | 1             | cytoplasm                                                                                                                                              | acid phosphatase activity, hydrolase activity, non-membrane spanning protein tyrosine phosphatase activity, phosphatase activity, phosphoprotein phosphatase activity, protein tyrosine phosphatase activity | protein amino acid dephosphorylation                                                                                                                                                                                                                                                                                                                                                                                                                                                                                                                          |

| Protein Name                                           | Gene Name | Accession No | Mw (kDa) | Peptide Count | GO Component                                                                                                                    | GO Function                                                                                                                                             | GO Process                                                                                                                                                                                                                                                                                                                              |
|--------------------------------------------------------|-----------|--------------|----------|---------------|---------------------------------------------------------------------------------------------------------------------------------|---------------------------------------------------------------------------------------------------------------------------------------------------------|-----------------------------------------------------------------------------------------------------------------------------------------------------------------------------------------------------------------------------------------------------------------------------------------------------------------------------------------|
| splicing factor 1 isoform 1                            | Sf1       | NP_001104261 | 68       | 1             | cytoplasm, nucleus, spliceosomal complex                                                                                        | metal ion binding, nucleic acid binding, RNA binding, zinc ion binding                                                                                  | cell cycle process, Leydig cell differentiation, male sex determination, mRNA processing, regulation of steroid biosynthetic process, regulation of transcription, RNA splicing, transcription                                                                                                                                          |
| DEAD (Asp-Glu-Ala-Asp) box polypeptide 6               | Ddx6      | NP_001104296 | 54       | 1             | cytoplasm                                                                                                                       | ATP binding, ATP-dependent helicase activity, helicase activity, hydrolase activity, nucleic acid binding, nucleotide binding, RNA binding              | not classified                                                                                                                                                                                                                                                                                                                          |
| hypothetical protein LOC666274                         | EG666274  | NP_001104748 | 19       | 1             | not classified                                                                                                                  | not classified                                                                                                                                          | not classified                                                                                                                                                                                                                                                                                                                          |
| outer dense fiber of sperm tails 2 isoform b           | Odf2      | NP_001106685 | 75       | 1             | cell projection, centriole, cilium, flagellum, microtubule                                                                      | structural constituent of cytoskeleton                                                                                                                  | cell differentiation, multicellular organismal development, spermatogenesis                                                                                                                                                                                                                                                             |
| ATP-binding cassette, sub-family A (ABC1), member 2    | Abca2     | NP_031405    | 271      | 1             | integral to membrane, lysosomal membrane, membrane                                                                              | ATP binding, ATPase activity, nucleoside-triphosphatase activity, nucleotide binding                                                                    | cholesterol metabolic process, transport                                                                                                                                                                                                                                                                                                |
| acid phosphatase 2, lysosomal                          | Acp2      | NP_031413    | 49       | 1             | integral to membrane, lysosome, membrane                                                                                        | acid phosphatase activity, hydrolase activity                                                                                                           | lysosome organization, skeletal system development                                                                                                                                                                                                                                                                                      |
| adenylosuccinate synthetase 1                          | Adss1     | NP_031447    | 50       | 1             | cytoplasm, membrane                                                                                                             | adenylosuccinate synthase activity, GTP binding, ligase activity, magnesium ion binding, metal ion binding, nucleotide binding, protein binding         | purine nucleotide biosynthetic process, purine nucleotide metabolic process                                                                                                                                                                                                                                                             |
| alkaline phosphatase 2, liver precursor                | Alpl      | NP_031457    | 58       | 1             | anchored to membrane, membrane, plasma membrane                                                                                 | alkaline phosphatase activity, catalytic activity, hydrolase activity, magnesium ion binding, metal ion binding, phosphatase activity, zinc ion binding | metabolic process, response to antibiotic                                                                                                                                                                                                                                                                                               |
| apoptosis inhibitor 5                                  | Api5      | NP_031492    | 57       | 1             | cytoplasm, nucleus, spliceosomal complex                                                                                        | not classified                                                                                                                                          | anti-apoptosis, apoptosis                                                                                                                                                                                                                                                                                                               |
| Na <sup>+</sup> /K <sup>+</sup> -ATPase beta 3 subunit | Atp1b3    | NP_031528    | 32       | 1             | cytoplasm, integral to membrane, membrane                                                                                       | potassium ion binding, protein binding, sodium ion binding, sodium:potassium-exchanging ATPase activity                                                 | ATP biosynthetic process, ion transport, potassium ion transport, sodium ion transport, transport                                                                                                                                                                                                                                       |
| NK3 homeobox 2                                         | Nkx3-2    | NP_031550    | 35       | 1             | nucleus                                                                                                                         | DNA binding, sequence-specific DNA binding, transcription factor activity, transcription regulator activity                                             | determination of left/right symmetry, embryonic skeletal system development, middle ear morphogenesis, negative regulation of apoptosis, organ formation, pancreas development, regulation of transcription, regulation of transcription, DNA-dependent, skeletal system development, skeletal system morphogenesis, spleen development |
| bassoon protein                                        | Bsn       | NP_031593    | 419      | 1             | cell junction, cytoplasm, cytoskeleton, integral to membrane, peripheral to membrane of membrane fraction, synapse, synaptosome | metal ion binding, zinc ion binding                                                                                                                     | not classified                                                                                                                                                                                                                                                                                                                          |

| Protein Name                                         | Gene Name | Accession No | Mw (kDa) | Peptide Count | GO Component                                                                                                                                                                                                                                                                                                                                                                 | GO Function                                                                                                                                                                                                                                                                                    | GO Process                                                                                                                                                                                                                                                                                                                                                                                                                                                                                                                                                                                                                                                                                                                                                                                                                                                                           |
|------------------------------------------------------|-----------|--------------|----------|---------------|------------------------------------------------------------------------------------------------------------------------------------------------------------------------------------------------------------------------------------------------------------------------------------------------------------------------------------------------------------------------------|------------------------------------------------------------------------------------------------------------------------------------------------------------------------------------------------------------------------------------------------------------------------------------------------|--------------------------------------------------------------------------------------------------------------------------------------------------------------------------------------------------------------------------------------------------------------------------------------------------------------------------------------------------------------------------------------------------------------------------------------------------------------------------------------------------------------------------------------------------------------------------------------------------------------------------------------------------------------------------------------------------------------------------------------------------------------------------------------------------------------------------------------------------------------------------------------|
| calcium/calmodulin-dependent protein kinase II, beta | Camk2b    | NP_031621    | 60       | 1             | calcium- and calmodulin-dependent protein kinase complex                                                                                                                                                                                                                                                                                                                     | ATP binding, calmodulin binding, calmodulin-dependent protein kinase activity, kinase activity, nucleotide binding, protein kinase activity, protein serine/threonine kinase activity, transferase activity                                                                                    | calcium ion transport, G1/S transition of mitotic cell cycle, protein amino acid autophosphorylation, protein amino acid phosphorylation                                                                                                                                                                                                                                                                                                                                                                                                                                                                                                                                                                                                                                                                                                                                             |
| calpain 3 isoform a                                  | Capn3     | NP_031627    | 94       | 1             | cytoplasm, intracellular                                                                                                                                                                                                                                                                                                                                                     | calcium ion binding, calcium-dependent cysteine-type endopeptidase activity, cysteine-type endopeptidase activity, cysteine-type peptidase activity, hydrolase activity, peptidase activity, protein binding                                                                                   | myofibril assembly, proteolysis, sarcomere organization                                                                                                                                                                                                                                                                                                                                                                                                                                                                                                                                                                                                                                                                                                                                                                                                                              |
| catenin (cadherin associated protein), beta 1, 88kDa | Ctnnb1    | NP_031640    | 85       | 1             | adherens junction, apical junction complex, apical part of cell, basolateral plasma membrane, cell projection membrane, cell-cell adherens junction, cell-cell junction, cytoplasm, cytoskeleton, fascia adherens, lamellipodium, lateral plasma membrane, membrane, membrane fraction, microvillus membrane, nucleus, plasma membrane, transcription factor complex, Z disc | alpha-catenin binding, binding, cadherin binding, chromatin binding, DNA binding, double-stranded DNA binding, protein binding, protein phosphatase binding, transcription activator activity, transcription coactivator activity, transcription factor activity, transcription factor binding | anterior/posterior axis specification, apoptosis, bone resorption, camera-type eye morphogenesis, cell adhesion, cell differentiation, cell fate determination, cell fate specification, cell maturation, cell morphogenesis involved in differentiation, cell proliferation, cell-cell adhesion, cell-matrix adhesion, cellular process, cellular protein localization, dorsal/ventral axis specification, dorsal/ventral pattern formation, ectoderm development, embryonic arm morphogenesis, embryonic digit morphogenesis, embryonic hindlimb morphogenesis, endoderm formation, endodermal cell fate commitment, epithelial cell differentiation involved in prostate gland development, forebrain development, gastrulation with mouth forming second, glial cell fate determination, heart development, hemopoiesis, lung development, morphogenesis of embryonic epithelium |
| CD5 antigen                                          | Cd5       | NP_031676    | 54       | 1             | external side of plasma membrane, integral to membrane, membrane, plasma membrane                                                                                                                                                                                                                                                                                            | protein binding, scavenger receptor activity                                                                                                                                                                                                                                                   | induction of apoptosis by extracellular signals, T cell costimulation                                                                                                                                                                                                                                                                                                                                                                                                                                                                                                                                                                                                                                                                                                                                                                                                                |
| cell division cycle 25 homolog A                     | Cdc25a    | NP_031684    | 58       | 1             | intracellular                                                                                                                                                                                                                                                                                                                                                                | hydrolase activity, phosphoprotein phosphatase activity, protein tyrosine phosphatase activity                                                                                                                                                                                                 | cell cycle, cell division, M phase of mitotic cell cycle, mitosis, protein amino acid dephosphorylation                                                                                                                                                                                                                                                                                                                                                                                                                                                                                                                                                                                                                                                                                                                                                                              |
| cadherin 6                                           | Cdh6      | NP_031692    | 88       | 1             | integral to membrane, membrane, plasma membrane                                                                                                                                                                                                                                                                                                                              | calcium ion binding, protein binding                                                                                                                                                                                                                                                           | cell adhesion, homophilic cell adhesion                                                                                                                                                                                                                                                                                                                                                                                                                                                                                                                                                                                                                                                                                                                                                                                                                                              |
| Eph receptor B6                                      | Ephb6     | NP_031706    | 110      | 1             | extracellular region, integral to membrane, membrane, plasma membrane                                                                                                                                                                                                                                                                                                        | ATP binding, ephrin receptor activity, nucleotide binding, protein kinase activity, protein tyrosine kinase activity, receptor activity                                                                                                                                                        | protein amino acid phosphorylation, transmembrane receptor protein tyrosine kinase signaling pathway                                                                                                                                                                                                                                                                                                                                                                                                                                                                                                                                                                                                                                                                                                                                                                                 |

| Protein Name                                                            | Gene Name | Accession No | Mw (kDa) | Peptide Count | GO Component                                                                          | GO Function                                                                                                                                                                                      | GO Process                                                                                                                                                                                                                                                                                        |
|-------------------------------------------------------------------------|-----------|--------------|----------|---------------|---------------------------------------------------------------------------------------|--------------------------------------------------------------------------------------------------------------------------------------------------------------------------------------------------|---------------------------------------------------------------------------------------------------------------------------------------------------------------------------------------------------------------------------------------------------------------------------------------------------|
| cystatin B                                                              | Cstb      | NP_031819    | 11       | 1             | cytoplasm, intracellular, nucleus                                                     | cysteine-type endopeptidase inhibitor activity, endopeptidase inhibitor activity, peptidase inhibitor activity, protease binding                                                                 | adult locomotory behavior                                                                                                                                                                                                                                                                         |
| cortactin                                                               | Ctnn      | NP_031829    | 61       | 1             | cell cortex, cell projection, cytoplasm, cytoskeleton, lamellipodium, ruffle          | protein binding                                                                                                                                                                                  | not classified                                                                                                                                                                                                                                                                                    |
| phenylalkylamine Ca <sup>2+</sup> antagonist (emopamil) binding protein | Ebp       | NP_031924    | 26       | 1             | endoplasmic reticulum, endoplasmic reticulum membrane, integral to membrane, membrane | C-8 sterol isomerase activity, cholesterol delta-isomerase activity, isomerase activity                                                                                                          | cholesterol biosynthetic process, hemopoiesis, lipid biosynthetic process, steroid biosynthetic process, sterol biosynthetic process, sterol metabolic process                                                                                                                                    |
| E74-like factor 3                                                       | Elf3      | NP_031947    | 42       | 1             | cytoplasm, nucleus                                                                    | DNA binding, sequence-specific DNA binding, transcription factor activity                                                                                                                        | anatomical structure morphogenesis, cell differentiation, embryonic development, extracellular matrix organization, inflammatory response, mammary gland involution, multicellular organismal development, regulation of transcription, regulation of transcription, DNA-dependent, transcription |
| epoxide hydrolase 2, cytoplasmic                                        | Ephx2     | NP_031966    | 63       | 1             | cytoplasm, peroxisome                                                                 | catalytic activity, epoxide hydrolase activity, hydrolase activity, magnesium ion binding, metal ion binding                                                                                     | aromatic compound catabolic process, metabolic process, response to toxin                                                                                                                                                                                                                         |
| FK506 binding protein 2                                                 | Fkbp2     | NP_032046    | 15       | 1             | endoplasmic reticulum, membrane                                                       | isomerase activity, peptidyl-prolyl cis-trans isomerase activity                                                                                                                                 | protein folding                                                                                                                                                                                                                                                                                   |
| beta-1,4-N-acetylgalactosaminyltransferase                              | B4galnt1  | NP_032106    | 59       | 1             | Golgi apparatus, integral to Golgi membrane, integral to membrane, membrane           | (N-acetylneuraminy)-galactosylglucosylceramide N-acetylgalactosaminyltransferase activity, transferase activity, transferring glycosyl groups, transferase activity, transferring hexosyl groups | ganglioside biosynthetic process, glycosphingolipid metabolic process, lipid glycosylation, lipid storage, spermatogenesis                                                                                                                                                                        |
| myotrophin                                                              | Mtpn      | NP_032124    | 13       | 1             | cytoplasm                                                                             | not classified                                                                                                                                                                                   | not classified                                                                                                                                                                                                                                                                                    |
| gamma-glutamyltransferase 1                                             | Ggt1      | NP_032142    | 62       | 1             | integral to membrane, integral to plasma membrane, membrane                           | acyltransferase activity, gamma-glutamyltransferase activity, transferase activity                                                                                                               | glutathione biosynthetic process, glutathione metabolic process, spermatogenesis                                                                                                                                                                                                                  |

| Protein Name                                            | Gene Name | Accession No | Mw (kDa) | Peptide Count | GO Component                                                                              | GO Function                                                                                                                                                                                                                          | GO Process                                                                                                                                                                                                                                                                                                                                                                                                                                                                                                                                                                           |
|---------------------------------------------------------|-----------|--------------|----------|---------------|-------------------------------------------------------------------------------------------|--------------------------------------------------------------------------------------------------------------------------------------------------------------------------------------------------------------------------------------|--------------------------------------------------------------------------------------------------------------------------------------------------------------------------------------------------------------------------------------------------------------------------------------------------------------------------------------------------------------------------------------------------------------------------------------------------------------------------------------------------------------------------------------------------------------------------------------|
| guanine nucleotide binding protein, alpha q polypeptide | Gnaq      | NP_032165    | 42       | 1             | heterotrimeric G-protein complex, membrane fraction, plasma membrane                      | GTP binding, GTPase activity, guanyl nucleotide binding, nucleotide binding, protein binding, signal transducer activity                                                                                                             | activation of adenylate cyclase activity by G-protein signaling pathway, activation of phospholipase C activity by dopamine receptor signaling pathway, behavior, embryonic digit morphogenesis, forebrain neuron development, glutamate signaling pathway, G-protein coupled receptor protein signaling pathway, heart development, neuron remodeling, pigmentation during development, post-embryonic development, protein amino acid ADP-ribosylation, regulation of action potential, regulation of melanocyte differentiation, signal transduction, skeletal system development |
| guanylate kinase 1                                      | Guk1      | NP_032219    | 22       | 1             | not classified                                                                            | ATP binding, guanylate kinase activity, kinase activity, nucleotide binding, transferase activity                                                                                                                                    | purine nucleotide metabolic process                                                                                                                                                                                                                                                                                                                                                                                                                                                                                                                                                  |
| host cell factor C1                                     | Hcfc1     | NP_032250    | 210      | 1             | cytoplasm, nucleus                                                                        | transcription coactivator activity                                                                                                                                                                                                   | cell cycle, reactivation of latent virus                                                                                                                                                                                                                                                                                                                                                                                                                                                                                                                                             |
| histone deacetylase 1                                   | Hdac1     | NP_032254    | 55       | 1             | cell soma, cytoplasm, heterochromatin, histone deacetylase complex, nucleus, NuRD complex | chromatin binding, DNA binding, histone deacetylase activity, hydrolase activity, protein binding, transcription corepressor activity, transcription factor activity, transcription factor binding, transcription repressor activity | chromatin modification, endoderm development, hippocampus development, histone deacetylation, negative regulation of gene-specific transcription from RNA polymerase II promoter, negative regulation of transcription, neuron differentiation, regulation of transcription, transcription                                                                                                                                                                                                                                                                                           |
| hepatoma-derived growth factor                          | Hdgf      | NP_032257    | 26       | 1             | cytoplasm, extracellular space, nucleus                                                   | DNA binding, growth factor activity, heparin binding, nucleotide binding                                                                                                                                                             | cellular process, regulation of transcription, transcription                                                                                                                                                                                                                                                                                                                                                                                                                                                                                                                         |
| homeobox A4                                             | Hoxa4     | NP_032291    | 30       | 1             | nucleus                                                                                   | DNA binding, sequence-specific DNA binding, transcription factor activity, transcription regulator activity                                                                                                                          | anterior/posterior pattern formation, embryonic skeletal system morphogenesis, multicellular organismal development, regulation of transcription, regulation of transcription, DNA-dependent, transcription                                                                                                                                                                                                                                                                                                                                                                          |
| DnaJ (Hsp40) homolog, subfamily A, member 1             | Dnaja1    | NP_032324    | 45       | 1             | membrane                                                                                  | heat shock protein binding, low-density lipoprotein receptor binding, metal ion binding, unfolded protein binding, zinc ion binding                                                                                                  | androgen receptor signaling pathway, protein folding, sperm motility, spermatogenesis                                                                                                                                                                                                                                                                                                                                                                                                                                                                                                |



| Protein Name                                                      | Gene Name | Accession No | Mw (kDa) | Peptide Count | GO Component                                                                                                      | GO Function                                                                                                                                                                                                                                                                                                  | GO Process                                                                                                                                                                                                                                                                                                                                                                                                                                                              |
|-------------------------------------------------------------------|-----------|--------------|----------|---------------|-------------------------------------------------------------------------------------------------------------------|--------------------------------------------------------------------------------------------------------------------------------------------------------------------------------------------------------------------------------------------------------------------------------------------------------------|-------------------------------------------------------------------------------------------------------------------------------------------------------------------------------------------------------------------------------------------------------------------------------------------------------------------------------------------------------------------------------------------------------------------------------------------------------------------------|
| N-deacetylase/N-sulfotransferase (heparan glucosaminyl) 1         | Ndst1     | NP_032332    | 101      | 1             | Golgi apparatus, integral to membrane, membrane                                                                   | [heparan sulfate]-glucosamine N-sulfotransferase activity, catalytic activity, hydrolase activity, sulfotransferase activity, transferase activity                                                                                                                                                           | embryonic development, embryonic neurocranium morphogenesis, embryonic viscerocranium morphogenesis, fibroblast growth factor receptor signaling pathway, forebrain development, glycosaminoglycan metabolic process, inflammatory response, MAPKKK cascade, midbrain development, organ morphogenesis, polysaccharide biosynthetic process, protein amino acid deacetylation, protein amino acid sulfation, respiratory gaseous exchange, smoothened signaling pathway |
| potassium voltage gated channel, Shab-related subfamily, member 1 | Kcnb1     | NP_032446    | 96       | 1             | integral to membrane, membrane, voltage-gated potassium channel complex                                           | ion channel activity, potassium channel activity, potassium ion binding, protein binding, voltage-gated ion channel activity, voltage-gated potassium channel activity                                                                                                                                       | ion transport, potassium ion transport, transport                                                                                                                                                                                                                                                                                                                                                                                                                       |
| rho/rac guanine nucleotide exchange factor (GEF) 2                | Arhgef2   | NP_032513    | 112      | 1             | cell junction, cell soma, cytoplasm, dendritic shaft, Golgi apparatus, intracellular, microtubule, tight junction | diacylglycerol binding, guanyl-nucleotide exchange factor activity, metal ion binding, microtubule binding, protein binding, Rho guanyl-nucleotide exchange factor activity, zinc ion binding                                                                                                                | actin filament organization, cell cycle, cell division, cell morphogenesis, intracellular signaling cascade, mitosis, regulation of Rho protein signal transduction                                                                                                                                                                                                                                                                                                     |
| lipocalin 2                                                       | Lcn2      | NP_032517    | 23       | 1             | extracellular region                                                                                              | binding, transporter activity                                                                                                                                                                                                                                                                                | response to virus, transport                                                                                                                                                                                                                                                                                                                                                                                                                                            |
| ribosomal protein S2                                              | Rps2      | NP_032529    | 31       | 1             | intracellular, ribonucleoprotein complex, ribosome, small ribosomal subunit                                       | RNA binding, structural constituent of ribosome                                                                                                                                                                                                                                                              | translation                                                                                                                                                                                                                                                                                                                                                                                                                                                             |
| mannosidase 2, alpha 1                                            | Man2a1    | NP_032575    | 132      | 1             | Golgi apparatus, Golgi membrane, integral to membrane, membrane                                                   | alpha-mannosidase activity, hydrolase activity, acting on glycosyl bonds, hydrolase activity, hydrolyzing N-glycosyl compounds, hydrolase activity, hydrolyzing O-glycosyl compounds, mannosidase activity, mannosyl-oligosaccharide 1,3-1.6-alpha-mannosidase activity, metal ion binding, zinc ion binding | carbohydrate metabolic process, in utero embryonic development, liver development, lung alveolus development, mannose metabolic process, metabolic process, mitochondrion organization, N-glycan processing, respiratory gaseous exchange, vacuole organization                                                                                                                                                                                                         |
| methylmalonyl-Coenzyme A mutase                                   | Mut       | NP_032676    | 83       | 1             | mitochondrion                                                                                                     | cobalamin binding, cobalt ion binding, intramolecular transferase activity, isomerase activity, metal ion binding, methylmalonyl-CoA mutase activity                                                                                                                                                         | metabolic process, post-embryonic development                                                                                                                                                                                                                                                                                                                                                                                                                           |

| Protein Name                                                             | Gene Name | Accession No | Mw (kDa) | Peptide Count | GO Component                                                                                                  | GO Function                                                                                                                                                                                                                                                               | GO Process                                                                                                                                                                                                                                                                            |
|--------------------------------------------------------------------------|-----------|--------------|----------|---------------|---------------------------------------------------------------------------------------------------------------|---------------------------------------------------------------------------------------------------------------------------------------------------------------------------------------------------------------------------------------------------------------------------|---------------------------------------------------------------------------------------------------------------------------------------------------------------------------------------------------------------------------------------------------------------------------------------|
| nebulin-related anchoring protein isoform S                              | Nrap      | NP_032759    | 196      | 1             | fascia adherens, muscle tendon junction, myofibril                                                            | actin binding, metal ion binding, muscle alpha-actinin binding, protein binding, vinculin binding, zinc ion binding                                                                                                                                                       | actin cytoskeleton organization                                                                                                                                                                                                                                                       |
| tumor necrosis factor receptor superfamily, member 11b (osteoprotegerin) | Tnfrsf11b | NP_032790    | 46       | 1             | extracellular region, proteinaceous extracellular matrix                                                      | protein binding, receptor activity                                                                                                                                                                                                                                        | apoptosis, extracellular matrix organization, negative regulation of odontogenesis of dentine-containing tooth, signal transduction                                                                                                                                                   |
| platelet-activating factor acetylhydrolase, isoform 1b, alpha2 subunit   | Pafah1b2  | NP_032801    | 26       | 1             | cytoplasm                                                                                                     | 1-alkyl-2-acetyl-glycerophosphocholine esterase activity, hydrolase activity, hydrolase activity, acting on ester bonds, lipase activity                                                                                                                                  | cell motion, lipid catabolic process, lipid metabolic process, spermatogenesis                                                                                                                                                                                                        |
| p21 (CDKN1A)-activated kinase 3                                          | Pak3      | NP_032804    | 61       | 1             | not classified                                                                                                | ATP binding, kinase activity, magnesium ion binding, metal ion binding, nucleotide binding, protein binding, protein kinase activity, protein serine/threonine kinase activity, Rho GTPase binding, SH3 domain binding, transferase activity                              | multicellular organismal development, protein amino acid phosphorylation                                                                                                                                                                                                              |
| peptidyl arginine deiminase, type II                                     | Padi2     | NP_032838    | 76       | 1             | cytoplasm                                                                                                     | calcium ion binding, hydrolase activity, protein-arginine deiminase activity                                                                                                                                                                                              | peptidyl-citrulline biosynthetic process from peptidyl-arginine, protein modification process                                                                                                                                                                                         |
| protein kinase C, theta                                                  | Prkcq     | NP_032885    | 82       | 1             | cytoplasm, immunological synapse, plasma membrane                                                             | ATP binding, diacylglycerol binding, kinase activity, magnesium ion binding, metal ion binding, nucleotide binding, protein binding, protein kinase activity, protein kinase C activity, protein serine/threonine kinase activity, transferase activity, zinc ion binding | intracellular signaling cascade, positive regulation of interleukin-2 biosynthetic process, positive regulation of NF-kappaB transcription factor activity, positive regulation of T cell activation, positive regulation of T cell proliferation, protein amino acid phosphorylation |
| DnaJ (Hsp40) homolog, subfamily C, member 3B                             | Dnajc3    | NP_032955    | 57       | 1             | not classified                                                                                                | not classified                                                                                                                                                                                                                                                            | not classified                                                                                                                                                                                                                                                                        |
| aminopeptidase puromycin sensitive                                       | Npepps    | NP_032968    | 103      | 1             | cytoplasm, nucleus                                                                                            | aminopeptidase activity, hydrolase activity, metal ion binding, metalloproteinase activity, peptidase activity, zinc ion binding                                                                                                                                          | proteolysis                                                                                                                                                                                                                                                                           |
| proteasome beta 4 subunit                                                | Psmb4     | NP_032971    | 29       | 1             | cytoplasm, nucleus, proteasome complex, proteasome core complex                                               | endopeptidase activity, hydrolase activity, peptidase activity, threonine-type endopeptidase activity                                                                                                                                                                     | proteolysis involved in cellular protein catabolic process                                                                                                                                                                                                                            |
| proteasome (prosome, macropain) 26S subunit, ATPase 3                    | Psmc3     | NP_032974    | 49       | 1             | cytoplasm, nucleus, proteasome complex                                                                        | ATP binding, hydrolase activity, nucleoside-triphosphatase activity, nucleotide binding                                                                                                                                                                                   | blastocyst development, protein catabolic process                                                                                                                                                                                                                                     |
| prothymosin alpha                                                        | Ptma      | NP_032998    | 12       | 1             | nucleus                                                                                                       | not classified                                                                                                                                                                                                                                                            | not classified                                                                                                                                                                                                                                                                        |
| ATP-binding cassette, sub-family D, member 3                             | Abcd3     | NP_033017    | 75       | 1             | integral to membrane, membrane, mitochondrial inner membrane, mitochondrion, peroxisomal membrane, peroxisome | ATP binding, ATPase activity, nucleoside-triphosphatase activity, nucleotide binding, protein binding                                                                                                                                                                     | transport                                                                                                                                                                                                                                                                             |
| RAB11B, member RAS oncogene family                                       | Rab11b    | NP_033023    | 24       | 1             | cytoplasmic membrane-bounded vesicle, membrane, plasma membrane                                               | GTP binding, nucleotide binding                                                                                                                                                                                                                                           | protein transport, small GTPase mediated signal transduction, transport                                                                                                                                                                                                               |

| Protein Name                                                                                      | Gene Name | Accession No | Mw (kDa) | Peptide Count | GO Component                                                                        | GO Function                                                                                                                                                                           | GO Process                                                                                                                                                            |
|---------------------------------------------------------------------------------------------------|-----------|--------------|----------|---------------|-------------------------------------------------------------------------------------|---------------------------------------------------------------------------------------------------------------------------------------------------------------------------------------|-----------------------------------------------------------------------------------------------------------------------------------------------------------------------|
| retinoic acid induced 1                                                                           | Rai1      | NP_033047    | 202      | 1             | cytoplasm, nucleus                                                                  | metal ion binding, protein binding, zinc ion binding                                                                                                                                  | negative regulation of multicellular organism growth, regulation of transcription from RNA polymerase II promoter, skeletal system development                        |
| ralA binding protein 1                                                                            | Ralbp1    | NP_033093    | 75       | 1             | intracellular, membrane                                                             | GTPase activator activity, protein binding, Rac GTPase activator activity, Ral GTPase binding                                                                                         | positive regulation of Cdc42 GTPase activity, signal transduction, transport                                                                                          |
| ribosomal protein L26                                                                             | Rpl26     | NP_033106    | 17       | 1             | cellular_component, ribosome                                                        | molecular_function                                                                                                                                                                    | biological_process                                                                                                                                                    |
| polymerase (RNA) II (DNA directed) polypeptide A                                                  | Polr2a    | NP_033115    | 213      | 1             | DNA-directed RNA polymerase II, core complex, nucleolus, nucleus                    | DNA binding, DNA-directed RNA polymerase activity, magnesium ion binding, metal ion binding, nucleotidyltransferase activity, protein binding, transferase activity, zinc ion binding | transcription, transcription from RNA polymerase II promoter                                                                                                          |
| ribosomal protein S4, X-linked                                                                    | Rps4x     | NP_033120    | 30       | 1             | intracellular, ribonucleoprotein complex, ribosome, small ribosomal subunit         | RNA binding, rRNA binding, structural constituent of ribosome                                                                                                                         | translation                                                                                                                                                           |
| solute carrier family 12, member 2                                                                | Slc12a2   | NP_033220    | 131      | 1             | apical plasma membrane, basolateral plasma membrane, integral to membrane, membrane | cation:chloride symporter activity, potassium ion binding, protein binding, sodium ion binding, symporter activity, transporter activity                                              | chloride transport, detection of mechanical stimulus involved in sensory perception of sound, ion transport, potassium ion transport, sodium ion transport, transport |
| SWI/SNF related, matrix associated, actin dependent regulator of chromatin, subfamily c, member 1 | Smarcc1   | NP_033237    | 123      | 1             | chromatin, intracellular, nucleus, SWI/SNF complex, XY body                         | chromatin binding, DNA binding, protein binding                                                                                                                                       | chromatin assembly or disassembly, chromatin modification, DNA packaging, organ morphogenesis, regulation of transcription, transcription                             |
| somatostatin                                                                                      | Sst       | NP_033241    | 13       | 1             | extracellular region                                                                | hormone activity                                                                                                                                                                      | regulation of cell migration                                                                                                                                          |
| serine (or cysteine) proteinase inhibitor, clade A, member 1b                                     | Serpina1b | NP_033270    | 46       | 1             | extracellular region                                                                | peptidase inhibitor activity, protein binding, serine-type endopeptidase inhibitor activity                                                                                           | acute-phase response, in utero embryonic development, protein amino acid N-linked glycosylation, response to cytokine stimulus, response to peptide hormone stimulus  |
| spermatid perinuclear RNA-binding protein                                                         | Strbp     | NP_033287    | 74       | 1             | cytoplasm, cytoskeleton, intracellular, microtubule cytoskeleton                    | DNA binding, double-stranded RNA binding, RNA binding, single-stranded RNA binding                                                                                                    | cell differentiation, cell motion, mechanosensory behavior, multicellular organismal development, spermatid development, spermatogenesis                              |
| zinc finger protein 143                                                                           | Zfp143    | NP_033307    | 69       | 1             | intracellular, nucleus                                                              | DNA binding, metal ion binding, nucleic acid binding, zinc ion binding                                                                                                                | regulation of transcription, transcription                                                                                                                            |
| steroid sulfatase                                                                                 | Sts       | NP_033319    | 67       | 1             | endoplasmic reticulum, integral to membrane, membrane, microsomal                   | calcium ion binding, catalytic activity, hydrolase activity, metal ion binding, sterol-sulfatase activity, sulfuric ester hydrolase activity                                          | female pregnancy, lipid metabolic process, metabolic process, steroid metabolic process                                                                               |
| synaptogyrin 2                                                                                    | Syng2     | NP_033330    | 25       | 1             | integral to membrane, membrane, synaptic vesicle                                    | not classified                                                                                                                                                                        | protein targeting                                                                                                                                                     |

| Protein Name                                                           | Gene Name | Accession No | Mw (kDa) | Peptide Count | GO Component                                                                                                                                               | GO Function                                                                                                                                        | GO Process                                                                                                                                                                                                                                                                                                                                                                                                                                                                                                                                                                           |
|------------------------------------------------------------------------|-----------|--------------|----------|---------------|------------------------------------------------------------------------------------------------------------------------------------------------------------|----------------------------------------------------------------------------------------------------------------------------------------------------|--------------------------------------------------------------------------------------------------------------------------------------------------------------------------------------------------------------------------------------------------------------------------------------------------------------------------------------------------------------------------------------------------------------------------------------------------------------------------------------------------------------------------------------------------------------------------------------|
| tumor necrosis factor, alpha-induced protein 1                         | Trnfap1   | NP_033421    | 36       | 1             | membrane, voltage-gated potassium channel complex                                                                                                          | protein binding, voltage-gated potassium channel activity                                                                                          | embryonic development, potassium ion transport                                                                                                                                                                                                                                                                                                                                                                                                                                                                                                                                       |
| troponin I, skeletal, fast 2                                           | Tnni2     | NP_033431    | 21       | 1             | not classified                                                                                                                                             | actin binding                                                                                                                                      | not classified                                                                                                                                                                                                                                                                                                                                                                                                                                                                                                                                                                       |
| topoisomerase (DNA) II beta                                            | Top2b     | NP_033435    | 182      | 1             | chromosome, nucleus                                                                                                                                        | ATP binding, DNA binding, DNA topoisomerase (ATP-hydrolyzing) activity, DNA topoisomerase activity, isomerase activity, nucleotide binding         | axonogenesis, DNA metabolic process, DNA topological change, forebrain development, neuron migration                                                                                                                                                                                                                                                                                                                                                                                                                                                                                 |
| trans-golgi network protein                                            | Tgoln1    | NP_033469    | 38       | 1             | Golgi apparatus, integral to membrane, membrane, plasma membrane, trans-Golgi network                                                                      | not classified                                                                                                                                     | not classified                                                                                                                                                                                                                                                                                                                                                                                                                                                                                                                                                                       |
| uroporphyrinogen decarboxylase                                         | Urod      | NP_033504    | 41       | 1             | cytoplasm, cytosol                                                                                                                                         | carboxy-lyase activity, lyase activity, uroporphyrinogen decarboxylase activity                                                                    | heme biosynthetic process, heme metabolic process, porphyrin biosynthetic process                                                                                                                                                                                                                                                                                                                                                                                                                                                                                                    |
| X-ray repair complementing defective repair in Chinese hamster cells 5 | Xrcc5     | NP_033559    | 83       | 1             | chromosome, cytoplasm, nucleus                                                                                                                             | ATP binding, ATP-dependent DNA helicase activity, DNA binding, helicase activity, hydrolase activity, nucleotide binding                           | cell proliferation, DNA recombination, DNA repair, double-strand break repair, double-strand break repair via nonhomologous end joining, hemopoietic stem cell differentiation, negative regulation of apoptosis, positive regulation of neurogenesis, response to DNA damage stimulus                                                                                                                                                                                                                                                                                               |
| activity-dependent neuroprotective protein                             | Adnp      | NP_033758    | 124      | 1             | extracellular space, intracellular, nucleus                                                                                                                | chromatin binding, DNA binding, metal ion binding, protein binding, sequence-specific DNA binding, transcription factor activity, zinc ion binding | negative regulation of neuron apoptosis, regulation of transcription, regulation of transcription, DNA-dependent, transcription                                                                                                                                                                                                                                                                                                                                                                                                                                                      |
| B-cell leukemia/lymphoma 2 related protein A1a                         | Bcl2a1a   | NP_033872    | 20       | 1             | cytoplasm                                                                                                                                                  | not classified                                                                                                                                     | apoptosis, B cell homeostasis, negative regulation of apoptosis, regulation of apoptosis                                                                                                                                                                                                                                                                                                                                                                                                                                                                                             |
| Bcl2-like 1                                                            | Bcl2l1    | NP_033873    | 26       | 1             | cytoplasm, cytosol, integral to membrane, intracellular, membrane, mitochondrial membrane, mitochondrial outer membrane, mitochondrial part, mitochondrion | protein binding, protein heterodimerization activity                                                                                               | anti-apoptosis, apoptosis, cell proliferation, fertilization, germ cell development, growth, in utero embryonic development, male gonad development, negative regulation of apoptosis, negative regulation of neuron apoptosis, ovarian follicle development, positive regulation of anti-apoptosis, positive regulation of apoptosis, positive regulation of cell proliferation, regulation of apoptosis, release of cytochrome c from mitochondria, response to cycloheximide, response to cytokine stimulus, response to protein stimulus, response to radiation, spermatogenesis |

| Protein Name                                                   | Gene Name | Accession No | Mw (kDa) | Peptide Count | GO Component                                                                                                                        | GO Function                                                                                                                                                                                                                                                        | GO Process                                                                                                                                                                                                                                                                                                                                                                                                                               |
|----------------------------------------------------------------|-----------|--------------|----------|---------------|-------------------------------------------------------------------------------------------------------------------------------------|--------------------------------------------------------------------------------------------------------------------------------------------------------------------------------------------------------------------------------------------------------------------|------------------------------------------------------------------------------------------------------------------------------------------------------------------------------------------------------------------------------------------------------------------------------------------------------------------------------------------------------------------------------------------------------------------------------------------|
| galactosidase, beta 1                                          | Glb1      | NP_033882    | 73       | 1             | lysosome                                                                                                                            | beta-galactosidase activity, catalytic activity, cation binding, hydrolase activity, hydrolase activity, acting on glycosyl bonds, hydrolase activity, hydrolyzing O-glycosyl compounds                                                                            | carbohydrate metabolic process, metabolic process                                                                                                                                                                                                                                                                                                                                                                                        |
| bone morphogenetic protein 1                                   | Bmp1      | NP_033885    | 112      | 1             | extracellular space                                                                                                                 | calcium ion binding, cytokine activity, growth factor activity, hydrolase activity, metal ion binding, metalloendopeptidase activity, metallopeptidase activity, peptidase activity, zinc ion binding                                                              | cartilage development, cell differentiation, multicellular organismal development, ossification, proteolysis                                                                                                                                                                                                                                                                                                                             |
| BMX non-receptor tyrosine kinase                               | Bmx       | NP_033889    | 75       | 1             | cytoplasm                                                                                                                           | ATP binding, kinase activity, metal ion binding, non-membrane spanning protein tyrosine kinase activity, nucleotide binding, protein binding, protein kinase activity, protein tyrosine kinase activity, receptor activity, transferase activity, zinc ion binding | intracellular signaling cascade, protein amino acid phosphorylation                                                                                                                                                                                                                                                                                                                                                                      |
| peripheral benzodiazepine receptor                             | Tspo      | NP_033905    | 19       | 1             | integral to membrane, membrane, mitochondrion                                                                                       | receptor activity                                                                                                                                                                                                                                                  | not classified                                                                                                                                                                                                                                                                                                                                                                                                                           |
| calpain 2                                                      | Capn2     | NP_033924    | 80       | 1             | cytoplasm, intracellular, membrane, plasma membrane                                                                                 | calcium ion binding, calcium-dependent cysteine-type endopeptidase activity, cysteine-type endopeptidase activity, cysteine-type peptidase activity, hydrolase activity, peptidase activity                                                                        | blastocyst development, myoblast fusion, proteolysis                                                                                                                                                                                                                                                                                                                                                                                     |
| F-actin capping protein alpha-1 subunit                        | Capza1    | NP_033927    | 33       | 1             | cortical cytoskeleton, F-actin capping protein complex, membrane                                                                    | actin binding                                                                                                                                                                                                                                                      | actin cytoskeleton organization, actin filament capping                                                                                                                                                                                                                                                                                                                                                                                  |
| capping protein (actin filament) muscle Z-line, beta isoform b | Capzb     | NP_033928    | 31       | 1             | cortical cytoskeleton, cytoplasm, cytoskeleton, F-actin capping protein complex, intercalated disc, lamellipodium, membrane, Z disc | actin binding                                                                                                                                                                                                                                                      | actin cytoskeleton organization, actin filament capping, cell projection organization, lamellipodium assembly                                                                                                                                                                                                                                                                                                                            |
| catalase                                                       | Cat       | NP_033934    | 60       | 1             | mitochondrion, peroxisomal membrane, peroxisome                                                                                     | aminoacylase activity, catalase activity, heme binding, iron ion binding, metal ion binding, oxidoreductase activity, oxidoreductase activity, acting on peroxide as acceptor, peroxidase activity                                                                 | aerobic respiration, cholesterol metabolic process, hemoglobin metabolic process, hydrogen peroxide catabolic process, negative regulation of NF-kappaB transcription factor activity, oxidation reduction, positive regulation of cell division, positive regulation of NF-kappaB transcription factor activity, positive regulation of phosphoinositide 3-kinase cascade, response to oxidative stress, triglyceride metabolic process |

| Protein Name                                      | Gene Name | Accession No | Mw (kDa) | Peptide Count | GO Component                                                                                   | GO Function                                                                                                                                   | GO Process                                                                                                                                                                                                                               |
|---------------------------------------------------|-----------|--------------|----------|---------------|------------------------------------------------------------------------------------------------|-----------------------------------------------------------------------------------------------------------------------------------------------|------------------------------------------------------------------------------------------------------------------------------------------------------------------------------------------------------------------------------------------|
| RB1-inducible coiled-coil 1                       | Rb1cc1    | NP_033956    | 182      | 1             | cytoplasm, nucleus                                                                             | protein binding                                                                                                                               | cell cycle, heart development, JNK cascade, liver development, negative regulation of apoptosis, positive regulation of cell size, positive regulation of protein amino acid phosphorylation, regulation of transcription, transcription |
| chaperonin containing Tcp1, subunit 4 (delta)     | Cct4      | NP_033967    | 58       | 1             | chaperonin-containing T-complex, cytoplasm                                                     | ATP binding, nucleotide binding, protein binding, unfolded protein binding                                                                    | cellular protein metabolic process, protein folding                                                                                                                                                                                      |
| procollagen, type X, alpha 1                      | Col10a1   | NP_034055    | 67       | 1             | cell cortex, extracellular region, proteinaceous extracellular matrix                          | not classified                                                                                                                                | not classified                                                                                                                                                                                                                           |
| collagen, type VI, alpha 1                        | Col6a1    | NP_034063    | 108      | 1             | extracellular matrix, extracellular region, proteinaceous extracellular matrix, sarcolemma     | platelet-derived growth factor binding, protein binding                                                                                       | cell adhesion                                                                                                                                                                                                                            |
| cathepsin C preproprotein                         | Ctsc      | NP_034112    | 52       | 1             | lysosome                                                                                       | chloride ion binding, cysteine-type endopeptidase activity, cysteine-type peptidase activity, hydrolase activity, peptidase activity          | proteolysis                                                                                                                                                                                                                              |
| diacylglycerol O-acyltransferase 1                | Dgat1     | NP_034176    | 57       | 1             | endoplasmic reticulum, integral to membrane, membrane, membrane fraction                       | 2-acylglycerol O-acyltransferase activity, acyltransferase activity, diacylglycerol O-acyltransferase activity, transferase activity          | not classified                                                                                                                                                                                                                           |
| dolichol-phosphate (beta-D) mannosyltransferase 1 | Dpm1      | NP_034202    | 29       | 1             | dolichol-phosphate-mannose synthase complex, endoplasmic reticulum, membrane fraction, nucleus | DNA binding, dolichyl-phosphate beta-D-mannosyltransferase activity, transferase activity, transferase activity, transferring glycosyl groups | dolichol metabolic process, GPI anchor biosynthetic process                                                                                                                                                                              |

| Protein Name                                                           | Gene Name | Accession No | Mw (kDa) | Peptide Count | GO Component                                                                                      | GO Function                                                                                                                                                                                                                                                                                                                         | GO Process                                                                                                                                                                                                                                                                                                                                                                                                                                                                                                                                                                                                                                                                                                                                                                                                                                                |
|------------------------------------------------------------------------|-----------|--------------|----------|---------------|---------------------------------------------------------------------------------------------------|-------------------------------------------------------------------------------------------------------------------------------------------------------------------------------------------------------------------------------------------------------------------------------------------------------------------------------------|-----------------------------------------------------------------------------------------------------------------------------------------------------------------------------------------------------------------------------------------------------------------------------------------------------------------------------------------------------------------------------------------------------------------------------------------------------------------------------------------------------------------------------------------------------------------------------------------------------------------------------------------------------------------------------------------------------------------------------------------------------------------------------------------------------------------------------------------------------------|
| dopamine receptor 2                                                    | Drd2      | NP_034207    | 51       | 1             | axon, dendrite, integral to membrane, membrane, plasma membrane                                   | dopamine binding, dopamine D2 receptor activity, dopamine receptor activity, dopamine receptor activity, coupled via Gi/Go, G-protein coupled receptor activity, receptor activity, signal transducer activity                                                                                                                      | activation of phospholipase C activity by dopamine receptor signaling pathway, adenylylation, development, adult behavior, adult walking behavior, associative learning, axonogenesis, behavioral response to cocaine, behavioral response to ethanol, branching morphogenesis of a nerve, cerebral cortex GABAergic interneuron migration, circadian regulation of gene expression, diuresis, dopamine metabolic process, dopamine receptor signaling pathway, feeding behavior, G-protein coupled receptor protein signaling pathway, grooming behavior, inhibition of adenylate cyclase activity by dopamine receptor signaling pathway, locomotory behavior, natriuresis, negative regulation of blood pressure, negative regulation of cell migration, negative regulation of cell proliferation, negative regulation of dopamine receptor signaling |
| eukaryotic translation initiation factor 3, subunit 10 (theta)         | Eif3a     | NP_034253    | 162      | 1             | cytoplasm, eukaryotic translation initiation factor 3 complex, nucleus                            | protein binding, translation initiation factor activity                                                                                                                                                                                                                                                                             | formation of translation initiation complex, translation                                                                                                                                                                                                                                                                                                                                                                                                                                                                                                                                                                                                                                                                                                                                                                                                  |
| X-ray repair complementing defective repair in Chinese hamster cells 6 | Xrcc6     | NP_034377    | 69       | 1             | chromosome, cytoplasm, DNA-dependent protein kinase-DNA ligase 4 complex, nucleus                 | ATP binding, ATP-dependent DNA helicase activity, DNA binding, helicase activity, hydrolase activity, nucleic acid binding, nucleotide binding                                                                                                                                                                                      | DNA recombination, DNA repair, double-strand break repair, double-strand break repair via nonhomologous end joining, positive regulation of neurogenesis, response to DNA damage stimulus, response to ionizing radiation, V(D)J recombination                                                                                                                                                                                                                                                                                                                                                                                                                                                                                                                                                                                                            |
| glycerol-3-phosphate dehydrogenase 1 (soluble)                         | Gpd1      | NP_034401    | 38       | 1             | cytoplasm, glycerol-3-phosphate dehydrogenase complex                                             | binding, catalytic activity, coenzyme binding, glycerol-3-phosphate dehydrogenase (NAD+) activity, NAD or NADH binding, oxidoreductase activity, oxidoreductase activity, acting on CH-OH group of donors, oxidoreductase activity, acting on the CH-OH group of donors, NAD or NADP as acceptor, protein homodimerization activity | carbohydrate metabolic process, gluconeogenesis, glycerol-3-phosphate catabolic process, glycerol-3-phosphate metabolic process, metabolic process, oxidation reduction                                                                                                                                                                                                                                                                                                                                                                                                                                                                                                                                                                                                                                                                                   |
| glycerol phosphate dehydrogenase 2, mitochondrial                      | Gpd2      | NP_034404    | 81       | 1             | glycerol-3-phosphate dehydrogenase complex, membrane, mitochondrial inner membrane, mitochondrion | calcium ion binding, glycerol-3-phosphate dehydrogenase activity, oxidoreductase activity                                                                                                                                                                                                                                           | gluconeogenesis, glycerol-3-phosphate metabolic process, oxidation reduction                                                                                                                                                                                                                                                                                                                                                                                                                                                                                                                                                                                                                                                                                                                                                                              |
| glial fibrillary acidic protein                                        | Gfap      | NP_034407    | 50       | 1             | cell part, cytoplasm, intermediate filament, intracellular, membrane fraction                     | protein binding, structural molecule activity                                                                                                                                                                                                                                                                                       | intermediate filament-based process                                                                                                                                                                                                                                                                                                                                                                                                                                                                                                                                                                                                                                                                                                                                                                                                                       |

| Protein Name                                                               | Gene Name | Accession No | Mw (kDa) | Peptide Count | GO Component                                                                                                       | GO Function                                                                                                                                                                             | GO Process                                                                                                                                                                                                                                                                                                                                                                   |
|----------------------------------------------------------------------------|-----------|--------------|----------|---------------|--------------------------------------------------------------------------------------------------------------------|-----------------------------------------------------------------------------------------------------------------------------------------------------------------------------------------|------------------------------------------------------------------------------------------------------------------------------------------------------------------------------------------------------------------------------------------------------------------------------------------------------------------------------------------------------------------------------|
| glycerol kinase-like 1                                                     | Gykl1     | NP_034423    | 60       | 1             | not classified                                                                                                     | kinase activity, transferase activity                                                                                                                                                   | spermatogenesis                                                                                                                                                                                                                                                                                                                                                              |
| guanine nucleotide binding protein, alpha z subunit                        | Gnaz      | NP_034441    | 41       | 1             | heterotrimeric G-protein complex, membrane, membrane fraction                                                      | GTP binding, GTPase activity, guanyl nucleotide binding, nucleotide binding, signal transducer activity                                                                                 | G-protein coupled receptor protein signaling pathway, signal transduction                                                                                                                                                                                                                                                                                                    |
| gonadotropin releasing hormone receptor                                    | Gnrhr     | NP_034453    | 38       | 1             | integral to membrane, membrane, plasma membrane                                                                    | gonadotropin-releasing hormone receptor activity, G-protein coupled receptor activity, receptor activity, signal transducer activity                                                    | G-protein coupled receptor protein signaling pathway, signal transduction                                                                                                                                                                                                                                                                                                    |
| glutathione S-transferase omega 1                                          | Gst01     | NP_034492    | 27       | 1             | cytoplasm                                                                                                          | glutathione transferase activity, transferase activity                                                                                                                                  | metabolic process                                                                                                                                                                                                                                                                                                                                                            |
| glucuronidase, beta                                                        | Gusb      | NP_034498    | 74       | 1             | endoplasmic reticulum, lysosome, microsome                                                                         | beta-glucuronidase activity, catalytic activity, cation binding, hydrolase activity, hydrolase activity, acting on glycosyl bonds, hydrolase activity, hydrolyzing O-glycosyl compounds | carbohydrate metabolic process, metabolic process                                                                                                                                                                                                                                                                                                                            |
| histocompatibility 2, D region locus 1                                     | H2-D1     | NP_034510    | 41       | 1             | external side of plasma membrane, integral to membrane, membrane, MHC class I protein complex, plasma membrane     | protein binding                                                                                                                                                                         | antigen processing and presentation, antigen processing and presentation of peptide antigen via MHC class I, immune response                                                                                                                                                                                                                                                 |
| hepatocyte growth factor                                                   | Hgf       | NP_034557    | 83       | 1             | not classified                                                                                                     | growth factor activity, serine-type endopeptidase activity                                                                                                                              | activation of MAPK activity, anti-apoptosis, cell morphogenesis, cell proliferation, hepatocyte growth factor receptor signaling pathway, liver development, myoblast proliferation, proteolysis, regulation of branching involved in salivary gland morphogenesis by mesenchymal-epithelial signaling                                                                       |
| ELAV (embryonic lethal, abnormal vision, Drosophila)-like 1 (Hu antigen R) | Elav1     | NP_034615    | 36       | 1             | nucleus                                                                                                            | nucleic acid binding, nucleotide binding, RNA binding                                                                                                                                   | mRNA stabilization                                                                                                                                                                                                                                                                                                                                                           |
| intercellular adhesion molecule                                            | Icam1     | NP_034623    | 59       | 1             | external side of plasma membrane, immunological synapse, integral to membrane, membrane                            | protein binding                                                                                                                                                                         | cell adhesion, cell adhesion mediated by integrin, cell-cell adhesion, leukocyte adhesion, regulation of cell adhesion, T cell antigen processing and presentation                                                                                                                                                                                                           |
| integrin beta 1 (fibronectin receptor beta)                                | Itgb1     | NP_034708    | 88       | 1             | integral to membrane, integrin complex, membrane, neuromuscular junction, plasma membrane, sarcolemma, synaptosome | binding, integrin binding, protein binding, receptor activity                                                                                                                           | cardiac muscle cell differentiation, cell adhesion, cell fate specification, cell-matrix adhesion, G1/S transition of mitotic cell cycle, germ cell migration, in utero embryonic development, integrin-mediated signaling pathway, negative regulation of cell differentiation, positive regulation of cell proliferation, regulation of cell cycle, sarcomere organization |



| Protein Name                                                                                   | Gene Name | Accession No | Mw (kDa) | Peptide Count | GO Component                                                                                                                                                                 | GO Function                                                                                                                                                                                                                                                                                                                                                                      | GO Process                                                                                                                                                     |
|------------------------------------------------------------------------------------------------|-----------|--------------|----------|---------------|------------------------------------------------------------------------------------------------------------------------------------------------------------------------------|----------------------------------------------------------------------------------------------------------------------------------------------------------------------------------------------------------------------------------------------------------------------------------------------------------------------------------------------------------------------------------|----------------------------------------------------------------------------------------------------------------------------------------------------------------|
| KH-type splicing regulatory protein (FUSE binding protein 2)                                   | Khsrp     | NP_034743    | 77       | 1             | cytoplasm, nucleus                                                                                                                                                           | aminoacyl-tRNA ligase activity, ATP binding, DNA binding, nucleotide binding, RNA binding                                                                                                                                                                                                                                                                                        | mRNA processing, mRNA transport, regulation of transcription, RNA splicing, transcription, translation, transport, tRNA aminoacylation for protein translation |
| kinesin family member 12                                                                       | Kif12     | NP_034746    | 71       | 1             | microtubule                                                                                                                                                                  | ATP binding, microtubule motor activity, motor activity, nucleotide binding                                                                                                                                                                                                                                                                                                      | microtubule-based movement                                                                                                                                     |
| keratin complex 1, acidic, gene 12                                                             | Krt12     | NP_034791    | 53       | 1             | intermediate filament                                                                                                                                                        | structural molecule activity                                                                                                                                                                                                                                                                                                                                                     | not classified                                                                                                                                                 |
| keratin 13                                                                                     | Krt13     | NP_034792    | 48       | 1             | intermediate filament                                                                                                                                                        | protein binding, structural molecule activity                                                                                                                                                                                                                                                                                                                                    | not classified                                                                                                                                                 |
| chymase 1, mast cell                                                                           | Cma1      | NP_034910    | 29       | 1             | extracellular region, intracellular                                                                                                                                          | hydrolase activity, peptidase activity, serine-type endopeptidase activity, serine-type peptidase activity                                                                                                                                                                                                                                                                       | proteolysis                                                                                                                                                    |
| moesin                                                                                         | Msn       | NP_034963    | 68       | 1             | apical part of cell, apical plasma membrane, basolateral plasma membrane, cell projection, cytoplasm, cytoskeleton, extrinsic to membrane, membrane, plasma membrane, uropod | binding, cytoskeletal protein binding                                                                                                                                                                                                                                                                                                                                            | not classified                                                                                                                                                 |
| NADH dehydrogenase (ubiquinone) Fe-S protein 4                                                 | Ndufs4    | NP_035017    | 18       | 1             | membrane, mitochondrial inner membrane, mitochondrial respiratory chain complex I, mitochondrion, respiratory chain                                                          | NADH dehydrogenase (ubiquinone) activity, oxidoreductase activity, acting on NADH or NADPH                                                                                                                                                                                                                                                                                       | electron transport chain, regulation of protein amino acid phosphorylation, transport                                                                          |
| sequestosome 1                                                                                 | Sqstm1    | NP_035148    | 48       | 1             | cytoplasm, endosome, nucleus                                                                                                                                                 | metal ion binding, protein binding, transcription cofactor activity, zinc ion binding                                                                                                                                                                                                                                                                                            | apoptosis, cell differentiation, immune response                                                                                                               |
| procollagen-proline, 2-oxoglutarate 4-dioxygenase (proline 4-hydroxylase), alpha 1 polypeptide | P4ha1     | NP_035160    | 61       | 1             | endoplasmic reticulum                                                                                                                                                        | binding, iron ion binding, L-ascorbic acid binding, metal ion binding, oxidoreductase activity, oxidoreductase activity, acting on paired donors, with incorporation or reduction of molecular oxygen, oxidoreductase activity, acting on single donors with incorporation of molecular oxygen, incorporation of two atoms of oxygen, procollagen-proline 4-dioxygenase activity | collagen fibril organization, oxidation reduction, peptidyl-proline hydroxylation to 4-hydroxy L-proline                                                       |
| phosphoenolpyruvate carboxykinase 1, cytosolic                                                 | Pck1      | NP_035174    | 69       | 1             | cytoplasm                                                                                                                                                                    | carboxy-lyase activity, GTP binding, kinase activity, lyase activity, manganese ion binding, metal ion binding, nucleotide binding, phosphoenolpyruvate carboxykinase (GTP) activity, phosphoenolpyruvate carboxykinase activity, purine nucleotide binding                                                                                                                      | gluconeogenesis, glycerol biosynthetic process from pyruvate, lipid metabolic process                                                                          |

| Protein Name                                                        | Gene Name | Accession No | Mw (kDa) | Peptide Count | GO Component                                                                                                        | GO Function                                                                                                                     | GO Process                                                                                                                                                                            |
|---------------------------------------------------------------------|-----------|--------------|----------|---------------|---------------------------------------------------------------------------------------------------------------------|---------------------------------------------------------------------------------------------------------------------------------|---------------------------------------------------------------------------------------------------------------------------------------------------------------------------------------|
| peroxisomal biogenesis factor 11b                                   | Pex11b    | NP_035199    | 29       | 1             | integral to membrane, membrane, mitochondrion, peroxisomal membrane, peroxisome                                     | not classified                                                                                                                  | peroxisome fission, peroxisome organization                                                                                                                                           |
| proteasome (prosome, macropain) subunit, beta type 7                | Psmb7     | NP_035317    | 30       | 1             | cytoplasm, nucleus, proteasome complex, proteasome core complex                                                     | endopeptidase activity, hydrolase activity, peptidase activity, threonine-type endopeptidase activity                           | proteolysis involved in cellular protein catabolic process                                                                                                                            |
| RAN binding protein 1                                               | Ranbp1    | NP_035369    | 24       | 1             | centrosome, cytoplasm                                                                                               | GTPase activator activity                                                                                                       | intracellular transport, positive regulation of mitotic centrosome separation, spindle organization                                                                                   |
| RAN binding protein 2                                               | Ranbp2    | NP_035370    | 341      | 1             | intracellular, nuclear pore, nucleus                                                                                | binding, isomerase activity, metal ion binding, peptidyl-prolyl cis-trans isomerase activity, protein binding, zinc ion binding | intracellular transport, modification-dependent protein catabolic process, mRNA transport, protein folding, protein transport, transmembrane transport, transport                     |
| polymerase (RNA) II (DNA directed) polypeptide J                    | Polr2j    | NP_035423    | 13       | 1             | DNA-directed RNA polymerase III complex, nucleus                                                                    | DNA binding, DNA-directed RNA polymerase activity, protein binding, protein dimerization activity                               | transcription                                                                                                                                                                         |
| ribosomal protein S7                                                | Rps7      | NP_035430    | 22       | 1             | intracellular, ribonucleoprotein complex, ribosome                                                                  | structural constituent of ribosome                                                                                              | translation                                                                                                                                                                           |
| KH domain containing, RNA binding, signal transduction associated 1 | Khdrbs1   | NP_035447    | 48       | 1             | membrane, nucleus                                                                                                   | protein binding, RNA binding, SH3 domain binding, SH3/SH2 adaptor activity, transcription repressor activity                    | cell cycle, cell surface receptor linked signal transduction, negative regulation of transcription, regulation of RNA export from nucleus, regulation of transcription, transcription |
| seryl-aminoacyl-tRNA synthetase                                     | Sars      | NP_035449    | 61       | 1             | cytoplasm                                                                                                           | aminoacyl-tRNA ligase activity, ATP binding, ligase activity, nucleotide binding, serine-tRNA ligase activity                   | seryl-tRNA aminoacylation, translation, tRNA aminoacylation for protein translation                                                                                                   |
| splicing factor, arginine/serine-rich 2                             | Sfrs2     | NP_035488    | 25       | 1             | nuclear speck, nucleus, spliceosomal complex                                                                        | nucleic acid binding, nucleotide binding, protein binding, RNA binding                                                          | mRNA processing, RNA splicing                                                                                                                                                         |
| small proline-rich protein 2B                                       | Sprr2b    | NP_035599    | 11       | 1             | cornified envelope, cytoplasm                                                                                       | not classified                                                                                                                  | epidermis development, keratinization, response to estradiol stimulus                                                                                                                 |
| testis derived transcript isoform 1                                 | Tes       | NP_035700    | 47       | 1             | cell junction, cytoplasm                                                                                            | metal ion binding, zinc ion binding                                                                                             | not classified                                                                                                                                                                        |
| translocase of inner mitochondrial membrane 44                      | Timm44    | NP_035722    | 51       | 1             | membrane, mitochondrial inner membrane, mitochondrial inner membrane presequence translocase complex, mitochondrion | ATP binding, nucleotide binding, P-P-bond-hydrolysis-driven protein transmembrane transporter activity                          | intracellular protein transport, protein transport, transmembrane transport, transport                                                                                                |
| tight junction protein 2                                            | Tjp2      | NP_035727    | 131      | 1             | cell junction, gap junction, membrane, nucleus, plasma membrane, tight junction                                     | protein binding                                                                                                                 | not classified                                                                                                                                                                        |
| talin 1                                                             | Tin1      | NP_035732    | 270      | 1             | cell projection, cytoplasm, cytoskeleton, focal adhesion, membrane, plasma membrane, ruffle                         | actin binding, binding, protein binding, structural constituent of cytoskeleton                                                 | cell-substrate junction assembly, cortical actin cytoskeleton organization, cytoskeletal anchoring at plasma membrane                                                                 |
| thymopoietin isoform alpha                                          | Tmpo      | NP_035735    | 75       | 1             | chromatin, chromosome, integral to membrane, membrane, nuclear envelope, nucleus                                    | DNA binding, protein binding                                                                                                    | regulation of transcription                                                                                                                                                           |

| Protein Name                                          | Gene Name | Accession No | Mw (kDa) | Peptide Count | GO Component                                                                             | GO Function                                                                                                                                                                                                            | GO Process                                                                                                                                                                                                                                                                   |
|-------------------------------------------------------|-----------|--------------|----------|---------------|------------------------------------------------------------------------------------------|------------------------------------------------------------------------------------------------------------------------------------------------------------------------------------------------------------------------|------------------------------------------------------------------------------------------------------------------------------------------------------------------------------------------------------------------------------------------------------------------------------|
| mesotrypsin                                           | Prss3     | NP_035775    | 26       | 1             | cellular_component                                                                       | hydrolase activity, molecular_function, peptidase activity, serine-type peptidase activity                                                                                                                             | biological_process                                                                                                                                                                                                                                                           |
| trypsin 4                                             | Try4      | NP_035776    | 26       | 1             | cellular_component                                                                       | hydrolase activity, molecular_function, peptidase activity, serine-type peptidase activity                                                                                                                             | biological_process                                                                                                                                                                                                                                                           |
| titin isoform N2-A                                    | Ttn       | NP_035782    | 3522     | 1             | A band, I band, M band, muscle myosin complex, sarcomere, Z disc                         | protein binding, structural constituent of cytoskeleton                                                                                                                                                                | adult heart development, cardiac myofibril assembly, forward locomotion, heart morphogenesis, in utero embryonic development, muscle contraction, sarcomere organization, striated muscle cell development                                                                   |
| bromodomain adjacent to zinc finger domain, 1B        | Baz1b     | NP_035844    | 171      | 1             | centromeric heterochromatin, chromatin remodeling complex, condensed chromosome, nucleus | ATP binding, kinase activity, metal ion binding, non-membrane spanning protein tyrosine kinase activity, nucleotide binding, protein binding, protein tyrosine kinase activity, transferase activity, zinc ion binding | chromatin assembly or disassembly, chromatin remodeling, regulation of transcription, response to DNA damage stimulus, transcription                                                                                                                                         |
| cellular repressor of E1A-stimulated genes 1          | Creg1     | NP_035934    | 24       | 1             | extracellular region, transcription factor complex                                       | transcription factor binding                                                                                                                                                                                           | regulation of growth, regulation of transcription, DNA-dependent                                                                                                                                                                                                             |
| monoglyceride lipase                                  | Mgll      | NP_035974    | 33       | 1             | not classified                                                                           | acylglycerol lipase activity, carboxylesterase activity, hydrolase activity                                                                                                                                            | not classified                                                                                                                                                                                                                                                               |
| 5'-3' exoribonuclease 2                               | Xrn2      | NP_036047    | 109      | 1             | intracellular, nucleus                                                                   | 5'-3' exoribonuclease activity, exonuclease activity, hydrolase activity, metal ion binding, nuclease activity, nucleic acid binding, zinc ion binding                                                                 | cell growth, DNA recombination, DNA repair, microtubule-based process, mRNA processing, nucleobase, nucleoside, nucleotide and nucleic acid metabolic process, regulation of transcription, RNA metabolic process, spermatogenesis, transcription, transcription termination |
| 2-4-dienoyl-Coenzyme A reductase 2, peroxisomal       | Decr2     | NP_036063    | 31       | 1             | peroxisome                                                                               | 2,4-dienoyl-CoA reductase (NADPH) activity, binding, catalytic activity, oxidoreductase activity                                                                                                                       | metabolic process, oxidation reduction                                                                                                                                                                                                                                       |
| mitogen-activated protein kinase binding protein 1    | Mapkbp1   | NP_036071    | 163      | 1             | cellular_component                                                                       | protein binding                                                                                                                                                                                                        | activation of JNKK activity                                                                                                                                                                                                                                                  |
| poly (ADP-ribose) glycohydrolase                      | Parg      | NP_036090    | 109      | 1             | cytosol, nucleus                                                                         | hydrolase activity, poly(ADP-ribose) glycohydrolase activity                                                                                                                                                           | carbohydrate metabolic process, detection of bacterium, response to DNA damage stimulus                                                                                                                                                                                      |
| proteasome (prosome, macropain) subunit, alpha type 4 | Psma4     | NP_036096    | 29       | 1             | cytoplasm, nucleus, proteasome complex, proteasome core complex                          | endopeptidase activity, hydrolase activity, peptidase activity, threonine-type endopeptidase activity                                                                                                                  | proteolysis involved in cellular protein catabolic process, ubiquitin-dependent protein catabolic process                                                                                                                                                                    |
| proteasome (prosome, macropain) subunit, beta type 2  | Psmb2     | NP_036100    | 23       | 1             | cytoplasm, nucleus, proteasome complex, proteasome core complex                          | endopeptidase activity, hydrolase activity, peptidase activity, threonine-type endopeptidase activity                                                                                                                  | proteolysis involved in cellular protein catabolic process                                                                                                                                                                                                                   |
| reticulocalbin 2                                      | Rcn2      | NP_036122    | 37       | 1             | endoplasmic reticulum                                                                    | calcium ion binding                                                                                                                                                                                                    | not classified                                                                                                                                                                                                                                                               |

| Protein Name                                                                    | Gene Name | Accession No | Mw (kDa) | Peptide Count | GO Component                                                                                                                                 | GO Function                                                                                                                                                                | GO Process                                                                                                                                                                                         |
|---------------------------------------------------------------------------------|-----------|--------------|----------|---------------|----------------------------------------------------------------------------------------------------------------------------------------------|----------------------------------------------------------------------------------------------------------------------------------------------------------------------------|----------------------------------------------------------------------------------------------------------------------------------------------------------------------------------------------------|
| eukaryotic translation initiation factor 2, subunit 3, structural gene X-linked | Eif2s3x   | NP_036140    | 51       | 1             | not classified                                                                                                                               | GTP binding, GTPase activity, nucleotide binding, translation initiation factor activity                                                                                   | translation                                                                                                                                                                                        |
| ribosomal protein L8                                                            | Rpl8      | NP_036183    | 28       | 1             | cellular_component, cytoplasm, intracellular, ribonucleoprotein complex, ribosome                                                            | molecular_function, RNA binding, rRNA binding, structural constituent of ribosome                                                                                          | biological_process, translation                                                                                                                                                                    |
| heat shock protein 105                                                          | Hsph1     | NP_038587    | 96       | 1             | cytoplasm, nucleus                                                                                                                           | ATP binding, nucleotide binding, protein binding                                                                                                                           | chaperone mediated protein folding requiring cofactor, response to stress                                                                                                                          |
| component of oligomeric golgi complex 1                                         | Cog1      | NP_038609    | 109      | 1             | Golgi apparatus, membrane                                                                                                                    | not classified                                                                                                                                                             | protein transport, transport                                                                                                                                                                       |
| ubiquitin specific protease 5 (isopeptidase T)                                  | Usp5      | NP_038728    | 96       | 1             | not classified                                                                                                                               | cysteine-type peptidase activity, hydrolase activity, metal ion binding, peptidase activity, ubiquitin thioesterase activity, zinc ion binding                             | modification-dependent protein catabolic process, ubiquitin-dependent protein catabolic process                                                                                                    |
| COP9 signalosome subunit 5                                                      | Cops5     | NP_038743    | 38       | 1             | cytoplasm, nucleus, signalosome, transcription factor complex                                                                                | hydrolase activity, metal ion binding, metallopeptidase activity, peptidase activity, protein binding, transcription coactivator activity, zinc ion binding                | regulation of cell cycle, regulation of transcription, DNA-dependent                                                                                                                               |
| Nik related kinase                                                              | Nrk       | NP_038752    | 164      | 1             | not classified                                                                                                                               | ATP binding, kinase activity, nucleotide binding, protein kinase activity, protein serine/threonine kinase activity, small GTPase regulator activity, transferase activity | activation of JNKK activity, protein amino acid phosphorylation                                                                                                                                    |
| zinc finger, HIT domain containing 2                                            | Znhit2    | NP_038887    | 43       | 1             | cellular_component                                                                                                                           | metal ion binding, molecular_function, zinc ion binding                                                                                                                    | biological_process                                                                                                                                                                                 |
| ATP-binding cassette, subfamily E, member 1                                     | Abce1     | NP_056566    | 67       | 1             | cytoplasm, mitochondrion                                                                                                                     | ATP binding, ATPase activity, electron carrier activity, iron-sulfur cluster binding, nucleoside-triphosphatase activity, nucleotide binding                               | not classified                                                                                                                                                                                     |
| shroom isoform 1                                                                | Shroom3   | NP_056571    | 214      | 1             | adherens junction, apical junction complex, apical part of cell, apical plasma membrane, cell junction, cytoplasm, cytoskeleton, microtubule | actin binding, protein binding                                                                                                                                             | actin cytoskeleton organization, columnar/cuboidal epithelial cell development, multicellular organismal development, neural tube closure, pattern specification process, regulation of cell shape |
| exosome component 10                                                            | Exosc10   | NP_057908    | 101      | 1             | cytoplasm, exosome (RNase complex), intracellular, nuclear exosome (RNase complex), nucleolus, nucleus                                       | 3'-5' exonuclease activity, exonuclease activity, hydrolase activity, nuclease activity, nucleic acid binding, RNA binding                                                 | nuclear-transcribed mRNA catabolic process, nonsense-mediated decay, nucleobase, nucleoside, nucleotide and nucleic acid metabolic process, RNA processing, rRNA processing                        |
| nucleosome binding protein 1                                                    | Nsbp1     | NP_057919    | 45       | 1             | chromatin, nucleoplasm, nucleus                                                                                                              | chromatin binding, DNA binding                                                                                                                                             | regulation of transcription, regulation of transcription from RNA polymerase I promoter, transcription                                                                                             |

| Protein Name                                   | Gene Name | Accession No | Mw (kDa) | Peptide Count | GO Component                                                                           | GO Function                                                                                                                                                                                                                                                                                                                                     | GO Process                                                                                                                                      |
|------------------------------------------------|-----------|--------------|----------|---------------|----------------------------------------------------------------------------------------|-------------------------------------------------------------------------------------------------------------------------------------------------------------------------------------------------------------------------------------------------------------------------------------------------------------------------------------------------|-------------------------------------------------------------------------------------------------------------------------------------------------|
| ATPase, Ca++ transporting, ubiquitous          | Atp2a3    | NP_058025    | 114      | 1             | endoplasmic reticulum, integral to membrane, membrane, nucleus, sarcoplasmic reticulum | ATP binding, ATPase activity, coupled to transmembrane movement of ions, phosphorylative mechanism, calcium ion binding, calcium-transporting ATPase activity, catalytic activity, hydrolase activity, acting on acid anhydrides, catalyzing transmembrane movement of substances, magnesium ion binding, metal ion binding, nucleotide binding | ATP biosynthetic process, calcium ion transport, cation transport, ion transport, metabolic process, transport                                  |
| H2A histone family, member Z                   | H2afz     | NP_058030    | 14       | 1             | Barr body, chromosome, nucleosome, nucleus                                             | DNA binding                                                                                                                                                                                                                                                                                                                                     | multicellular organismal development, nucleosome assembly                                                                                       |
| peroxiredoxin 4                                | Prdx4     | NP_058044    | 31       | 1             | cytoplasm, mitochondrion                                                               | antioxidant activity, molecular_function, oxidoreductase activity, peroxidase activity, peroxiredoxin activity                                                                                                                                                                                                                                  | biological_process, cell redox homeostasis, oxidation reduction                                                                                 |
| vesicle-associated membrane protein 8          | Vamp8     | NP_058074    | 11       | 1             | early endosome, integral to membrane, membrane                                         | protein binding                                                                                                                                                                                                                                                                                                                                 | vesicle-mediated transport                                                                                                                      |
| serine/arginine repetitive matrix 1            | Srrm1     | NP_058079    | 101      | 1             | nuclear matrix, nucleus, spliceosomal complex                                          | DNA binding, protein binding, RNA binding, RNA splicing factor activity, transesterification mechanism                                                                                                                                                                                                                                          | mRNA processing, nuclear mRNA splicing, via spliceosome, RNA splicing                                                                           |
| golgi SNAP receptor complex member 1           | Gosr1     | NP_058090    | 28       | 1             | Golgi apparatus, Golgi membrane, integral to membrane, membrane                        | protein binding, receptor activity                                                                                                                                                                                                                                                                                                              | ER to Golgi vesicle-mediated transport, intracellular protein transport, protein transport, vesicle-mediated transport                          |
| cleavage and polyadenylation specific factor 2 | Cpsf2     | NP_058552    | 88       | 1             | nucleus                                                                                | hydrolase activity, RNA binding                                                                                                                                                                                                                                                                                                                 | mRNA processing                                                                                                                                 |
| keratin 35                                     | Krt35     | NP_058576    | 48       | 1             | intermediate filament                                                                  | structural molecule activity                                                                                                                                                                                                                                                                                                                    | not classified                                                                                                                                  |
| phosphomannomutase 2                           | Pmm2      | NP_058577    | 28       | 1             | cytoplasm                                                                              | catalytic activity, isomerase activity, phosphomannomutase activity                                                                                                                                                                                                                                                                             | mannose biosynthetic process, metabolic process                                                                                                 |
| regulatory factor X, 5                         | Rfx5      | NP_059091    | 70       | 1             | not classified                                                                         | not classified                                                                                                                                                                                                                                                                                                                                  | negative regulation of transcription from RNA polymerase II promoter                                                                            |
| cytidine 5'-triphosphate synthase 2            | Ctps2     | NP_061207    | 66       | 1             | cellular_component                                                                     | ATP binding, catalytic activity, CTP synthase activity, ligase activity, nucleotide binding                                                                                                                                                                                                                                                     | glutamine metabolic process, pyrimidine nucleotide biosynthetic process                                                                         |
| secreted frizzled-related sequence protein 5   | Sfrp5     | NP_061250    | 35       | 1             | extracellular region                                                                   | not classified                                                                                                                                                                                                                                                                                                                                  | cell differentiation, multicellular organismal development, Wnt receptor signaling pathway                                                      |
| histone H1-like protein in spermatids 1        | Hils1     | NP_061262    | 19       | 1             | chromosome, nucleus                                                                    | DNA binding                                                                                                                                                                                                                                                                                                                                     | cell differentiation, chromatin modification, multicellular organismal development, regulation of transcription, spermatogenesis, transcription |
| SAM domain- and HD domain-containing protein 1 | Samhd1    | NP_061339    | 73       | 1             | nucleus                                                                                | catalytic activity, hydrolase activity                                                                                                                                                                                                                                                                                                          | immune response, innate immune response                                                                                                         |
| sodium channel, voltage-gated, type IX, alpha  | Scn9a     | NP_061340    | 225      | 1             | integral to membrane, membrane, voltage-gated sodium channel complex                   | ion channel activity, sodium channel activity, sodium ion binding, voltage-gated ion channel activity, voltage-gated sodium channel activity                                                                                                                                                                                                    | behavioral response to pain, inflammatory response, ion transport, post-embryonic development, sodium ion transport, transport                  |

| Protein Name                                                                              | Gene Name | Accession No | Mw (kDa) | Peptide Count | GO Component                                                                                                                                                           | GO Function                                                                                                                                                                                                                                                                 | GO Process                                                                                                                                                                                    |
|-------------------------------------------------------------------------------------------|-----------|--------------|----------|---------------|------------------------------------------------------------------------------------------------------------------------------------------------------------------------|-----------------------------------------------------------------------------------------------------------------------------------------------------------------------------------------------------------------------------------------------------------------------------|-----------------------------------------------------------------------------------------------------------------------------------------------------------------------------------------------|
| 3-monooxygenase/tryptophan 5-monooxygenase activation protein, gamma polypeptide          | Ywhag     | NP_061359    | 28       | 1             | cellular_component, cytoplasm                                                                                                                                          | protein domain specific binding                                                                                                                                                                                                                                             | protein targeting                                                                                                                                                                             |
| RNA and export factor binding protein 2                                                   | Refbp2    | NP_062357    | 24       | 1             | cytoplasm, nucleus, spliceosomal complex                                                                                                                               | nucleic acid binding, nucleotide binding, RNA binding, single-stranded DNA binding                                                                                                                                                                                          | mRNA processing, mRNA transport, RNA splicing, transport                                                                                                                                      |
| actin-like 6A                                                                             | Actl6a    | NP_062647    | 47       | 1             | chromatin remodeling complex, nucleus                                                                                                                                  | ATP binding, chromatin binding, protein binding                                                                                                                                                                                                                             | chromatin modification, chromatin remodeling, regulation of growth, regulation of transcription, transcription                                                                                |
| DnaJ (Hsp40) homolog, subfamily C, member 7                                               | Dnajc7    | NP_062769    | 56       | 1             | not classified                                                                                                                                                         | binding, heat shock protein binding                                                                                                                                                                                                                                         | not classified                                                                                                                                                                                |
| RNA binding motif protein 14                                                              | Rbm14     | NP_063922    | 69       | 1             | cellular_component, nucleus                                                                                                                                            | molecular_function, nucleic acid binding, nucleotide binding, RNA binding                                                                                                                                                                                                   | biological_process, regulation of transcription, transcription                                                                                                                                |
| inositol 1,4,5-triphosphate receptor 2 isoform 1                                          | Itp2      | NP_064307    | 307      | 1             | cell cortex, cytoplasm, endoplasmic reticulum, integral to membrane, membrane, microsome, sarcoplasmic reticulum                                                       | calcium channel activity, calcium ion binding, calcium-release channel activity, inositol 1,4,5-trisphosphate-sensitive calcium-release channel activity, inositol-1,4,5-trisphosphate receptor activity, ion channel activity, phosphoinositide binding, receptor activity | calcium ion transport, ion transport, transport                                                                                                                                               |
| microtubule associated serine/threonine kinase 1                                          | Mast1     | NP_064329    | 171      | 1             | cytoplasm, cytoskeleton, membrane, plasma membrane                                                                                                                     | ATP binding, kinase activity, magnesium ion binding, metal ion binding, nucleotide binding, protein binding, protein kinase activity, protein serine/threonine kinase activity, transferase activity                                                                        | cytoskeleton organization, protein amino acid phosphorylation                                                                                                                                 |
| deoxyribonuclease II beta                                                                 | Dnase2b   | NP_064341    | 41       | 1             | cytoplasm, extracellular region, lysosome                                                                                                                              | deoxyribonuclease II activity, endodeoxyribonuclease activity, endonuclease activity, hydrolase activity, nuclease activity                                                                                                                                                 | DNA metabolic process                                                                                                                                                                         |
| sortilin 1                                                                                | Sort1     | NP_064356    | 91       | 1             | endoplasmic reticulum, endosome, Golgi apparatus, integral to membrane, lysosome, membrane, microsome, nucleus, plasma membrane, trans-Golgi network transport vesicle | receptor activity                                                                                                                                                                                                                                                           | cell differentiation, endocytosis, glucose import, multicellular organismal development, myotube differentiation, ossification, response to insulin stimulus, transport, vesicle organization |
| SH3-binding domain glutamic acid-rich protein like                                        | Sh3bgrl   | NP_064373    | 13       | 1             | cellular_component                                                                                                                                                     | molecular_function, SH3 domain binding                                                                                                                                                                                                                                      | biological_process                                                                                                                                                                            |
| kaiso protein                                                                             | Zbtb33    | NP_064652    | 74       | 1             | intracellular, nucleus                                                                                                                                                 | DNA binding, metal ion binding, protein binding, zinc ion binding                                                                                                                                                                                                           | regulation of transcription, transcription, Wnt receptor signaling pathway                                                                                                                    |
| ATP synthase, H <sup>+</sup> transporting, mitochondrial F0 complex, subunit f, isoform 2 | Atp5j2    | NP_065607    | 10       | 1             | membrane, mitochondrial inner membrane, mitochondrion, proton-transporting ATP synthase complex, coupling factor F(o)                                                  | not classified                                                                                                                                                                                                                                                              | ATP biosynthetic process, ion transport, proton transport, transport                                                                                                                          |
| interferon stimulated exonuclease                                                         | Isg20     | NP_065608    | 21       | 1             | intracellular, nucleus                                                                                                                                                 | exonuclease activity, exoribonuclease II activity, hydrolase activity, manganese ion binding, metal ion binding, nuclease activity, RNA binding                                                                                                                             | not classified                                                                                                                                                                                |

| Protein Name                                            | Gene Name      | Accession No | Mw (kDa) | Peptide Count | GO Component                                                                          | GO Function                                                                                                                       | GO Process                                                                                                                                                                                        |
|---------------------------------------------------------|----------------|--------------|----------|---------------|---------------------------------------------------------------------------------------|-----------------------------------------------------------------------------------------------------------------------------------|---------------------------------------------------------------------------------------------------------------------------------------------------------------------------------------------------|
| splicing factor, arginine/serine-rich 4 (SRp75)         | Sfrs4          | NP_065612    | 39       | 1             | nucleus                                                                               | nucleic acid binding, nucleotide binding, RNA binding                                                                             | mRNA processing, RNA splicing                                                                                                                                                                     |
| spectrin beta 3                                         | Spnb3          | NP_067262    | 271      | 1             | not classified                                                                        | actin binding                                                                                                                     | not classified                                                                                                                                                                                    |
| diazepam binding inhibitor-like 5                       | Dbil5          | NP_067269    | 10       | 1             | cytoplasm                                                                             | acyl-CoA binding, binding, lipid binding                                                                                          | transport                                                                                                                                                                                         |
| ataxin 2 binding protein 1 isoform gamma                | A2bp1          | NP_067452    | 43       | 1             | cytoplasm, nucleus                                                                    | nucleic acid binding, nucleotide binding, RNA binding                                                                             | mRNA processing, RNA splicing                                                                                                                                                                     |
| sulfide quinone reductase-like                          | Sqrdl          | NP_067482    | 50       | 1             | mitochondrial inner membrane, mitochondrion                                           | oxidoreductase activity                                                                                                           | oxidation reduction                                                                                                                                                                               |
| THAP domain containing 11                               | Thap11         | NP_067488    | 33       | 1             | cytoplasm, nucleus                                                                    | DNA binding, metal ion binding, nucleic acid binding, zinc ion binding                                                            | regulation of transcription, transcription                                                                                                                                                        |
| PDZ domain containing 1                                 | Pdzk1          | NP_067492    | 56       | 1             | brush border membrane, cytoplasm, membrane                                            | protein binding                                                                                                                   | not classified                                                                                                                                                                                    |
| melanocyte proliferating gene 1                         | Myg1           | NP_068359    | 43       | 1             | mitochondrion, nucleus                                                                | molecular_function                                                                                                                | biological_process                                                                                                                                                                                |
| fibronectin type III domain containing 4                | Fndc4          | NP_071869    | 25       | 1             | integral to membrane, membrane                                                        | not classified                                                                                                                    | not classified                                                                                                                                                                                    |
| glutaredoxin 3                                          | Glxr3          | NP_075629    | 38       | 1             | cytoplasm                                                                             | electron carrier activity, protein disulfide oxidoreductase activity                                                              | cell redox homeostasis                                                                                                                                                                            |
| non-POU-domain-containing, octamer binding protein      | Nono           | NP_075633    | 55       | 1             | nucleus, paraspeckles                                                                 | DNA binding, nucleic acid binding, nucleotide binding, protein binding, RNA binding                                               | DNA recombination, DNA repair, mRNA processing, regulation of transcription, response to DNA damage stimulus, RNA splicing, transcription                                                         |
| protein phosphatase-1 regulatory subunit 7              | Ppp1r7         | NP_075689    | 41       | 1             | nucleus                                                                               | protein binding                                                                                                                   | not classified                                                                                                                                                                                    |
| hypothetical protein LOC66511                           | 2500003M10 Rik | NP_075704    | 24       | 1             | not classified                                                                        | not classified                                                                                                                    | not classified                                                                                                                                                                                    |
| Shwachman-Bodian-Diamond syndrome homolog               | Sbds           | NP_075737    | 29       | 1             | cellular_component, cytoplasm                                                         | molecular_function                                                                                                                | inner cell mass cell proliferation, ribosome biogenesis                                                                                                                                           |
| mesoderm development candidate 2                        | Mesdc2         | NP_075892    | 25       | 1             | not classified                                                                        | not classified                                                                                                                    | mesoderm development                                                                                                                                                                              |
| coiled-coil-helix-coiled-coil-helix domain containing 2 | Chchd2         | NP_077128    | 16       | 1             | mitochondrion                                                                         | molecular_function                                                                                                                | biological_process                                                                                                                                                                                |
| 3-oxoacid CoA transferase 1                             | Oxct1          | NP_077150    | 56       | 1             | mitochondrion                                                                         | 3-oxoacid CoA-transferase activity, CoA-transferase activity, transferase activity                                                | cellular ketone body metabolic process, ketone body catabolic process, metabolic process                                                                                                          |
| ribosomal protein L24                                   | Rpl24          | NP_077180    | 18       | 1             | cytosolic large ribosomal subunit, intracellular, ribonucleoprotein complex, ribosome | structural constituent of ribosome                                                                                                | exit from mitosis, G1/S transition checkpoint, optic nerve development, retina development in camera-type eye, retinal ganglion cell axon guidance, ribosomal large subunit assembly, translation |
| sorting nexin 5                                         | Snx5           | NP_077187    | 47       | 1             | not classified                                                                        | phosphoinositide binding, protein binding                                                                                         | cell communication, protein transport, transport                                                                                                                                                  |
| fucosidase, alpha-L-1, tissue                           | Fuca1          | NP_077205    | 52       | 1             | lysosome                                                                              | alpha-L-fucosidase activity, catalytic activity, cation binding, hydrolase activity, hydrolase activity, acting on glycosyl bonds | carbohydrate metabolic process, fucose metabolic process, metabolic process                                                                                                                       |
| hypothetical protein LOC72425                           | 2410042D21 Rik | NP_077216    | 34       | 1             | not classified                                                                        | not classified                                                                                                                    | not classified                                                                                                                                                                                    |
| hydroxyacyl glutathione hydrolase                       | Hagh           | NP_077246    | 29       | 1             | cytoplasm, mitochondrion                                                              | hydrolase activity, hydroxyacylglutathione hydrolase activity, metal ion binding, zinc ion binding                                | not classified                                                                                                                                                                                    |
| blood vessel epicardial substance                       | Bves           | NP_077247    | 41       | 1             | integral to membrane, membrane                                                        | not classified                                                                                                                    | not classified                                                                                                                                                                                    |
| FtsJ homolog 3                                          | Ftsj3          | NP_079586    | 96       | 1             | cellular_component, nucleus                                                           | methyltransferase activity, molecular_function, nucleic acid binding, transferase activity                                        | biological_process, methylation, rRNA methylation, rRNA processing                                                                                                                                |

| Protein Name                                                                     | Gene Name      | Accession No | Mw (kDa) | Peptide Count | GO Component                                                                                                                                                                           | GO Function                                                                                                                                                                       | GO Process                                                                                                                                                                                    |
|----------------------------------------------------------------------------------|----------------|--------------|----------|---------------|----------------------------------------------------------------------------------------------------------------------------------------------------------------------------------------|-----------------------------------------------------------------------------------------------------------------------------------------------------------------------------------|-----------------------------------------------------------------------------------------------------------------------------------------------------------------------------------------------|
| ATP synthase, H+ transporting, mitochondrial F1 complex, delta subunit precursor | Atp5d          | NP_079589    | 18       | 1             | membrane, mitochondrial envelope, mitochondrial inner membrane, mitochondrion, proton-transporting ATP synthase complex, proton-transporting ATP synthase complex, catalytic core F(1) | hydrogen ion transmembrane transporter activity, hydrogen ion transporting ATP synthase activity, rotational mechanism, proton-transporting ATPase activity, rotational mechanism | ATP biosynthetic process, ATP synthesis coupled proton transport, ion transport, proton transport, transport                                                                                  |
| keratinocyte associated protein 2                                                | Krtcap2        | NP_079603    | 15       | 1             | integral to membrane, membrane, oligosaccharyltransferase complex                                                                                                                      | dolichyl-diphosphooligosaccharide protein glycotransferase activity                                                                                                               | protein amino acid N-linked glycosylation via asparagine                                                                                                                                      |
| coiled-coil-helix-coiled-coil-helix domain containing 3                          | Chchd3         | NP_079612    | 26       | 1             | mitochondrial inner membrane, mitochondrion                                                                                                                                            | not classified                                                                                                                                                                    | not classified                                                                                                                                                                                |
| required for meiotic nuclear division 1 homolog                                  | Rmnd1          | NP_079619    | 52       | 1             | cellular_component                                                                                                                                                                     | molecular_function                                                                                                                                                                | biological_process                                                                                                                                                                            |
| ubiquitin-conjugating enzyme E2D 3 (UBC4/5 homolog, yeast)                       | Ube2d3         | NP_079632    | 17       | 1             | not classified                                                                                                                                                                         | ATP binding, ligase activity, nucleotide binding, small conjugating protein ligase activity, ubiquitin-protein ligase activity                                                    | modification-dependent protein catabolic process, post-translational protein modification, proteasomal ubiquitin-dependent protein catabolic process, regulation of protein metabolic process |
| ATPase, H+ transporting, lysosomal V1 subunit F                                  | Atp6v1f        | NP_079657    | 13       | 1             | proton-transporting two-sector ATPase complex, catalytic domain, proton-transporting V-type ATPase, V1 domain                                                                          | hydrogen ion transporting ATP synthase activity, rotational mechanism, proton-transporting ATPase activity, rotational mechanism                                                  | ATP synthesis coupled proton transport, ion transport, proton transport, transport                                                                                                            |
| transmembrane protein 14C                                                        | Tmem14c        | NP_079663    | 12       | 1             | integral to membrane, membrane, mitochondrion                                                                                                                                          | not classified                                                                                                                                                                    | not classified                                                                                                                                                                                |
| 6-phosphogluconolactonase                                                        | Pgls           | NP_079672    | 27       | 1             | not classified                                                                                                                                                                         | 6-phosphogluconolactonase activity, hydrolase activity                                                                                                                            | carbohydrate metabolic process, pentose-phosphate shunt                                                                                                                                       |
| Sec11-like 3                                                                     | Sec11c         | NP_079744    | 22       | 1             | endoplasmic reticulum, integral to membrane, membrane, microsome                                                                                                                       | hydrolase activity, peptidase activity, serine-type peptidase activity                                                                                                            | proteolysis, signal peptide processing                                                                                                                                                        |
| keratin associated protein 3-3                                                   | Krtap3-3       | NP_079800    | 11       | 1             | intermediate filament, keratin filament                                                                                                                                                | structural molecule activity                                                                                                                                                      | not classified                                                                                                                                                                                |
| SAR1a gene homolog 2                                                             | Sar1b          | NP_079811    | 22       | 1             | endoplasmic reticulum, Golgi apparatus, intracellular, membrane                                                                                                                        | GTP binding, magnesium ion binding, metal ion binding, nucleotide binding                                                                                                         | intracellular protein transport, protein transport, transport, vesicle-mediated transport                                                                                                     |
| splicing factor, arginine/serine rich 9                                          | Sfrs9          | NP_079849    | 26       | 1             | nucleus                                                                                                                                                                                | nucleic acid binding, nucleotide binding, RNA binding                                                                                                                             | mRNA processing, RNA splicing                                                                                                                                                                 |
| asparaginase like 1                                                              | Asrgl1         | NP_079886    | 34       | 1             | cytoplasm                                                                                                                                                                              | asparaginase activity, hydrolase activity                                                                                                                                         | asparagine catabolic process via L-aspartate                                                                                                                                                  |
| lectin, galactose-binding, soluble 2                                             | Lgals2         | NP_079898    | 15       | 1             | not classified                                                                                                                                                                         | sugar binding                                                                                                                                                                     | not classified                                                                                                                                                                                |
| ORM1-like 3                                                                      | Ormdl3         | NP_079937    | 17       | 1             | endoplasmic reticulum, integral to membrane, membrane                                                                                                                                  | not classified                                                                                                                                                                    | not classified                                                                                                                                                                                |
| phosphoglucomutase 1                                                             | Pgm1           | NP_079976    | 69       | 1             | not classified                                                                                                                                                                         | phosphoglucomutase activity                                                                                                                                                       | glucose metabolic process                                                                                                                                                                     |
| hypothetical protein LOC66763                                                    | 4933425L06 Rik | NP_080027    | 65       | 1             | not classified                                                                                                                                                                         | not classified                                                                                                                                                                    | not classified                                                                                                                                                                                |
| Tax1 binding protein 1 homolog                                                   | Tax1bp1        | NP_080092    | 94       | 1             | intracellular                                                                                                                                                                          | protein binding, zinc ion binding                                                                                                                                                 | anti-apoptosis, apoptosis                                                                                                                                                                     |
| prenylcysteine oxidase 1                                                         | Pcyox1         | NP_080099    | 56       | 1             | lysosome                                                                                                                                                                               | oxidoreductase activity, oxidoreductase activity, acting on sulfur group of donors, oxygen as acceptor, prenylcysteine oxidase activity                                           | oxidation reduction, prenylcysteine catabolic process                                                                                                                                         |
| basic leucine zipper and W2 domains 1                                            | Bzw1           | NP_080100    | 48       | 1             | not classified                                                                                                                                                                         | not classified                                                                                                                                                                    | regulation of transcription, transcription                                                                                                                                                    |



| Protein Name                                                          | Gene Name      | Accession No | Mw (kDa) | Peptide Count | GO Component                                                                                                                                       | GO Function                                                                                                              | GO Process                                                                                                                                   |
|-----------------------------------------------------------------------|----------------|--------------|----------|---------------|----------------------------------------------------------------------------------------------------------------------------------------------------|--------------------------------------------------------------------------------------------------------------------------|----------------------------------------------------------------------------------------------------------------------------------------------|
| mannose-6-phosphate receptor binding protein 1                        | M6prbp1        | NP_080112    | 47       | 1             | cytoplasm, endosome, lipid particle, membrane                                                                                                      | not classified                                                                                                           | transport                                                                                                                                    |
| NADH dehydrogenase (ubiquinone) 1 beta subcomplex, 7                  | Ndufb7         | NP_080119    | 16       | 1             | membrane, mitochondrial inner membrane, mitochondrion, respiratory chain                                                                           | NADH dehydrogenase (ubiquinone) activity, NADH dehydrogenase activity                                                    | electron transport chain, transport                                                                                                          |
| succinate dehydrogenase complex, subunit D, integral membrane protein | Sdhd           | NP_080124    | 17       | 1             | integral to membrane, membrane, mitochondrial envelope, mitochondrial inner membrane, mitochondrion                                                | heme binding, iron ion binding, metal ion binding                                                                        | electron transport chain, transport, tricarboxylic acid cycle                                                                                |
| CDGSH iron sulfur domain 2                                            | Cisd2          | NP_080178    | 15       | 1             | cytoplasmic part, endoplasmic reticulum, integral to membrane, intracellular membrane-bounded organelle, membrane, perinuclear region of cytoplasm | 2 iron, 2 sulfur cluster binding, iron ion binding, iron-sulfur cluster binding, metal ion binding, molecular_function   | biological_process                                                                                                                           |
| arginyl-tRNA synthetase                                               | Rars           | NP_080212    | 76       | 1             | cytoplasm                                                                                                                                          | aminoacyl-tRNA ligase activity, arginine-tRNA ligase activity, ATP binding, ligase activity, nucleotide binding          | arginyl-tRNA aminoacylation, translation, tRNA aminoacylation for protein translation                                                        |
| GTP-binding protein PTD004 isoform a                                  | Ola1           | NP_080218    | 45       | 1             | intracellular                                                                                                                                      | ATP binding, GTP binding, hydrolase activity, nucleotide binding                                                         | not classified                                                                                                                               |
| glyoxalase domain containing 4                                        | Glod4          | NP_080305    | 33       | 1             | mitochondrion                                                                                                                                      | not classified                                                                                                           | not classified                                                                                                                               |
| dedicator of cytokinesis 7                                            | Dock7          | NP_080358    | 238      | 1             | cell projection                                                                                                                                    | GTP binding, GTPase binding, guanyl-nucleotide exchange factor activity, Rac GTPase binding                              | cell differentiation, multicellular organismal development, nervous system development, pigmentation                                         |
| eukaryotic translation initiation factor 2, subunit 1 alpha           | Eif2s1         | NP_080390    | 36       | 1             | cytoplasm, eukaryotic translation initiation factor 2 complex, nucleus                                                                             | protein binding, RNA binding, translation initiation factor activity                                                     | protein amino acid autophosphorylation, regulation of translation, regulation of translational initiation in response to stress, translation |
| splicing factor 3a, subunit 1                                         | Sf3a1          | NP_080451    | 89       | 1             | nucleus, spliceosomal complex                                                                                                                      | RNA binding                                                                                                              | mRNA processing, RNA processing, RNA splicing                                                                                                |
| hypothetical protein LOC67759                                         | 5033414D02 Rik | NP_080638    | 17       | 1             | integral to membrane, membrane                                                                                                                     | not classified                                                                                                           | not classified                                                                                                                               |
| actin related protein 2/3 complex, subunit 5                          | Arpc5          | NP_080645    | 16       | 1             | Arp2/3 protein complex, cell projection, cytoplasm, cytoskeleton, lamellipodium                                                                    | actin binding                                                                                                            | regulation of actin filament polymerization                                                                                                  |
| interleukin enhancer binding factor 2                                 | Ilf2           | NP_080650    | 43       | 1             | nucleolus, nucleus                                                                                                                                 | DNA binding, protein binding                                                                                             | biological_process, regulation of transcription, transcription                                                                               |
| sorting nexin 2                                                       | Snx2           | NP_080662    | 58       | 1             | not classified                                                                                                                                     | phosphoinositide binding, protein binding, protein transporter activity                                                  | cell communication, intracellular protein transport, protein transport, transport                                                            |
| pyrophosphatase                                                       | Ppa1           | NP_080714    | 33       | 1             | cytoplasm                                                                                                                                          | hydrolase activity, inorganic diphosphatase activity, magnesium ion binding, metal ion binding, pyrophosphatase activity | phosphate metabolic process                                                                                                                  |
| Mki67 (FHA domain) interacting nucleolar phosphoprotein               | Mki67ip        | NP_080748    | 36       | 1             | cytoplasm, nucleolus, nucleus                                                                                                                      | nucleic acid binding, nucleotide binding, RNA binding                                                                    | biological_process                                                                                                                           |
| tubulin polymerization-promoting protein family member 3              | Tppp3          | NP_080757    | 19       | 1             | not classified                                                                                                                                     | not classified                                                                                                           | not classified                                                                                                                               |
| M-phase phosphoprotein 10 (U3 small nucleolar ribonucleoprotein)      | Mphosph10      | NP_080759    | 79       | 1             | nucleus, ribonucleoprotein complex                                                                                                                 | not classified                                                                                                           | ribosome biogenesis, rRNA processing                                                                                                         |
| dephospho-CoA kinase domain containing                                | Dcakd          | NP_080827    | 26       | 1             | not classified                                                                                                                                     | ATP binding, dephospho-CoA kinase activity, nucleotide binding                                                           | coenzyme A biosynthetic process                                                                                                              |
| ubiquitin 1                                                           | Ubn1           | NP_080942    | 122      | 1             | cell junction, nucleus, tight junction                                                                                                             | DNA binding, transcription factor binding                                                                                | chromatin modification, keratinocyte differentiation                                                                                         |

| Protein Name                                   | Gene Name      | Accession No | Mw (kDa) | Peptide Count | GO Component                                                                | GO Function                                                                                                                                  | GO Process                                                                                                                             |
|------------------------------------------------|----------------|--------------|----------|---------------|-----------------------------------------------------------------------------|----------------------------------------------------------------------------------------------------------------------------------------------|----------------------------------------------------------------------------------------------------------------------------------------|
| biliverdin reductase A                         | Blvra          | NP_080954    | 34       | 1             | cytoplasm, soluble fraction                                                 | biliverdin reductase activity, binding, catalytic activity, metal ion binding, nucleotide binding, oxidoreductase activity, zinc ion binding | heme catabolic process, metabolic process, oxidation reduction                                                                         |
| coiled-coil domain containing 88C              | Ccdc88c        | NP_080957    | 227      | 1             | insoluble fraction                                                          | PDZ domain binding, protein self-association                                                                                                 | protein destabilization, protein homooligomerization, regulation of protein amino acid phosphorylation, Wnt receptor signaling pathway |
| SAPS domain family, member 2 isoform 1         | Saps2          | NP_081089    | 100      | 1             | cytoplasm                                                                   | protein binding, protein phosphatase binding                                                                                                 | regulation of phosphoprotein phosphatase activity                                                                                      |
| small nuclear ribonucleoprotein D2             | Snrpd2         | NP_081219    | 14       | 1             | nucleus, ribonucleoprotein complex, spliceosomal complex                    | nucleic acid binding                                                                                                                         | mRNA processing, RNA splicing                                                                                                          |
| peroxisomal biogenesis factor 11c              | Pex11c         | NP_081227    | 27       | 1             | integral to membrane, membrane, peroxisomal membrane, peroxisome            | not classified                                                                                                                               | peroxisome fission                                                                                                                     |
| histidine triad protein member 5               | Dcps           | NP_081306    | 39       | 1             | cytoplasm, nucleus                                                          | hydrolase activity, protein binding                                                                                                          | deadenylation-dependent decapping of nuclear-transcribed mRNA, nuclear-transcribed mRNA catabolic process, nonsense-mediated decay     |
| pirin                                          | Pir            | NP_081429    | 32       | 1             | nucleus                                                                     | iron ion binding, metal ion binding                                                                                                          | not classified                                                                                                                         |
| hypothetical protein LOC69696                  | 2310057N15 Rik | NP_081446    | 22       | 1             | cellular_component                                                          | molecular_function                                                                                                                           | biological_process                                                                                                                     |
| golgi membrane protein 1                       | Golm1          | NP_081583    | 44       | 1             | Golgi apparatus, integral to membrane, membrane                             | molecular_function                                                                                                                           | biological_process                                                                                                                     |
| sideroflexin 1                                 | Sfxn1          | NP_081600    | 36       | 1             | integral to membrane, membrane, mitochondrial inner membrane, mitochondrion | cation transmembrane transporter activity, iron ion binding                                                                                  | cation transport, erythrocyte differentiation, ion transport, iron ion transport, transport                                            |
| hypothetical protein LOC70420                  | 2610034B18 Rik | NP_081696    | 25       | 1             | not classified                                                              | not classified                                                                                                                               | not classified                                                                                                                         |
| poliovirus receptor                            | Pvr            | NP_081790    | 45       | 1             | cellular_component, integral to membrane, membrane                          | protein binding, receptor activity                                                                                                           | cell migration, cell-cell adhesion                                                                                                     |
| follicular lymphoma variant translocation 1    | Kdsr           | NP_081810    | 36       | 1             | endoplasmic reticulum, integral to membrane, membrane                       | 3-dehydroshinganine reductase activity, binding, catalytic activity, oxidoreductase activity                                                 | metabolic process, oxidation reduction                                                                                                 |
| doublecortin-like kinase 2                     | Dclk2          | NP_081815    | 83       | 1             | not classified                                                              | ATP binding, kinase activity, nucleotide binding, protein kinase activity, protein serine/threonine kinase activity, transferase activity    | intracellular signaling cascade, protein amino acid phosphorylation                                                                    |
| synaptonemal complex central element protein 2 | Syce2          | NP_082230    | 20       | 1             | central element, nucleus, synaptonemal complex                              | protein binding                                                                                                                              | cell cycle, cell division, meiosis, meiotic prophase I, synaptonemal complex assembly                                                  |
| germ cell-less homolog 1 (Drosophila)-like     | Gmcl1          | NP_082231    | 58       | 1             | nucleus                                                                     | protein binding                                                                                                                              | cell differentiation, modification-dependent protein catabolic process, multicellular organismal development, spermatogenesis          |
| epsin 3                                        | Epn3           | NP_082260    | 68       | 1             | cytoplasm, cytoplasmic vesicle                                              | lipid binding                                                                                                                                | not classified                                                                                                                         |

| Protein Name                                                  | Gene Name      | Accession No | Mw (kDa) | Peptide Count | GO Component                                                             | GO Function                                                                                                                                                                                                                                        | GO Process                                                                                      |
|---------------------------------------------------------------|----------------|--------------|----------|---------------|--------------------------------------------------------------------------|----------------------------------------------------------------------------------------------------------------------------------------------------------------------------------------------------------------------------------------------------|-------------------------------------------------------------------------------------------------|
| acyl-Coenzyme A dehydrogenase family, member 10               | Acad10         | NP_082313    | 119      | 1             | mitochondrion                                                            | acyl-CoA dehydrogenase activity, catalytic activity, electron carrier activity, FAD binding, hydrolase activity, oxidoreductase activity, oxidoreductase activity, acting on the CH-CH group of donors                                             | metabolic process, oxidation reduction                                                          |
| hypothetical protein LOC66665                                 | 5730528L13 Rik | NP_082413    | 32       | 1             | cellular_component                                                       | identical protein binding                                                                                                                                                                                                                          | biological_process                                                                              |
| F-box and leucine-rich repeat protein 20                      | Fbxl20         | NP_082425    | 48       | 1             | cytoplasm                                                                | protein binding                                                                                                                                                                                                                                    | modification-dependent protein catabolic process                                                |
| MMS19 (MET18 S. cerevisiae)                                   | Mms19          | NP_082428    | 113      | 1             | nucleus                                                                  | not classified                                                                                                                                                                                                                                     | DNA repair, regulation of transcription, response to DNA damage stimulus, transcription         |
| exportin 5                                                    | Xpo5           | NP_082474    | 137      | 1             | cytoplasm, nucleus                                                       | binding, protein transporter activity, RNA binding, tRNA binding                                                                                                                                                                                   | gene silencing by RNA, protein export from nucleus, protein transport, transport                |
| protein phosphatase methylesterase 1                          | Ppme1          | NP_082568    | 42       | 1             | not classified                                                           | carboxylesterase activity, catalytic activity, hydrolase activity                                                                                                                                                                                  | not classified                                                                                  |
| tyrosyl-DNA phosphodiesterase 1                               | Tdp1           | NP_082630    | 69       | 1             | cytoplasm, nucleus                                                       | exonuclease activity, hydrolase activity, molecular_function, nuclease activity, phosphoric diester hydrolase activity                                                                                                                             | DNA repair, response to DNA damage stimulus, single strand break repair                         |
| NADH dehydrogenase (ubiquinone) flavoprotein 2                | Ndufv2         | NP_082664    | 27       | 1             | membrane, mitochondrial inner membrane, mitochondrion, respiratory chain | 2 iron, 2 sulfur cluster binding, electron carrier activity, iron ion binding, iron-sulfur cluster binding, metal ion binding, NAD or NADH binding, NADH dehydrogenase (ubiquinone) activity, NADH dehydrogenase activity, oxidoreductase activity | electron transport chain, oxidation reduction, transport                                        |
| glutaredoxin 5                                                | Glx5           | NP_082695    | 16       | 1             | mitochondrion                                                            | electron carrier activity, protein disulfide oxidoreductase activity                                                                                                                                                                               | cell redox homeostasis                                                                          |
| proline-rich coiled-coil 1                                    | Prrc1          | NP_082723    | 46       | 1             | cellular_component, Golgi apparatus                                      | identical protein binding                                                                                                                                                                                                                          | biological_process                                                                              |
| Nice-4 protein homolog isoform 1                              | Ubap2l         | NP_082751    | 117      | 1             | not classified                                                           | not classified                                                                                                                                                                                                                                     | not classified                                                                                  |
| G+C-rich promoter-binding protein                             | Gpbp1          | NP_082763    | 56       | 1             | nucleus                                                                  | DNA binding, protein binding, transcription factor activity                                                                                                                                                                                        | positive regulation of transcription, DNA-dependent, regulation of transcription, transcription |
| hypothetical protein LOC73694                                 | 2410091C18 Rik | NP_082887    | 48       | 1             | mitochondrion                                                            | not classified                                                                                                                                                                                                                                     | not classified                                                                                  |
| solute carrier family 35, member B2                           | Slc35b2        | NP_082938    | 42       | 1             | Golgi apparatus, integral to membrane, membrane                          | not classified                                                                                                                                                                                                                                     | transport                                                                                       |
| keratin 80                                                    | Krt80          | NP_083046    | 51       | 1             | intermediate filament, keratin filament                                  | structural molecule activity                                                                                                                                                                                                                       | not classified                                                                                  |
| hypothetical protein LOC74528                                 | 8430406I07Rik  | NP_083260    | 38       | 1             | not classified                                                           | not classified                                                                                                                                                                                                                                     | not classified                                                                                  |
| splicing factor 3a, subunit 3                                 | Sf3a3          | NP_083433    | 59       | 1             | intracellular, nucleus, spliceosomal complex                             | metal ion binding, nucleic acid binding, zinc ion binding                                                                                                                                                                                          | mRNA processing, RNA splicing                                                                   |
| hypothetical protein LOC228602                                | 4930402H24 Rik | NP_083708    | 132      | 1             | not classified                                                           | not classified                                                                                                                                                                                                                                     | not classified                                                                                  |
| cleavage and polyadenylation specific factor 4-like isoform 2 | Cpsf4l         | NP_084070    | 22       | 1             | not classified                                                           | metal ion binding, zinc ion binding                                                                                                                                                                                                                | not classified                                                                                  |
| tubulin-specific chaperone d                                  | Tbcd           | NP_084154    | 133      | 1             | not classified                                                           | not classified                                                                                                                                                                                                                                     | not classified                                                                                  |
| GA repeat binding protein, beta 2                             | Gabpb2         | NP_084161    | 46       | 1             | nucleus                                                                  | protein homodimerization activity                                                                                                                                                                                                                  | regulation of transcription, transcription                                                      |
| zinc finger protein 142                                       | Zfp142         | NP_084164    | 195      | 1             | not classified                                                           | not classified                                                                                                                                                                                                                                     | not classified                                                                                  |
| coiled-coil domain containing 93 isoform c                    | Ccdc93         | NP_084231    | 72       | 1             | not classified                                                           | not classified                                                                                                                                                                                                                                     | not classified                                                                                  |

| Protein Name                                                         | Gene Name      | Accession No | Mw (kDa) | Peptide Count | GO Component                                                                                                    | GO Function                                                                                                                                                                                | GO Process                                                                                                                                                                                          |
|----------------------------------------------------------------------|----------------|--------------|----------|---------------|-----------------------------------------------------------------------------------------------------------------|--------------------------------------------------------------------------------------------------------------------------------------------------------------------------------------------|-----------------------------------------------------------------------------------------------------------------------------------------------------------------------------------------------------|
| cystatin E2                                                          | 9230104L09 Rik | NP_084236    | 15       | 1             | not classified                                                                                                  | not classified                                                                                                                                                                             | not classified                                                                                                                                                                                      |
| ADAMTS-like 1                                                        | Adamts1        | NP_084243    | 193      | 1             | extracellular region, proteinaceous extracellular matrix                                                        | metallopeptidase activity, zinc ion binding                                                                                                                                                | not classified                                                                                                                                                                                      |
| methylcrotonoyl-Coenzyme A carboxylase 2 (beta)                      | Mccc2          | NP_084302    | 61       | 1             | mitochondrion                                                                                                   | ATP binding, ligase activity, methylcrotonoyl-CoA carboxylase activity, nucleotide binding                                                                                                 | not classified                                                                                                                                                                                      |
| acyl-Coenzyme A binding domain containing 7                          | Acbd7          | NP_084339    | 10       | 1             | not classified                                                                                                  | acyl-CoA binding, binding                                                                                                                                                                  | not classified                                                                                                                                                                                      |
| GTP-binding protein PTD004 isoform b                                 | Ola1           | NP_084367    | 30       | 1             | intracellular                                                                                                   | ATP binding, GTP binding, hydrolase activity, nucleotide binding                                                                                                                           | not classified                                                                                                                                                                                      |
| centaurin, beta 2                                                    | Centb2         | NP_084414    | 87       | 1             | ruffle                                                                                                          | ARF GTPase activator activity, GTPase activator activity, metal ion binding, zinc ion binding                                                                                              | actin filament-based process, regulation of ARF GTPase activity                                                                                                                                     |
| hypothetical protein LOC78890                                        | 2310079F23 Rik | NP_084484    | 80       | 1             | cytoplasm                                                                                                       | methyltransferase activity, transferase activity                                                                                                                                           | tRNA processing                                                                                                                                                                                     |
| WD repeat domain 76                                                  | Wdr76          | NP_084510    | 58       | 1             | not classified                                                                                                  | not classified                                                                                                                                                                             | not classified                                                                                                                                                                                      |
| regulator of nonsense transcripts 1                                  | Upf1           | NP_109605    | 123      | 1             | cytoplasm                                                                                                       | ATP binding, DNA binding, helicase activity, hydrolase activity, metal ion binding, nucleotide binding, zinc ion binding                                                                   | nuclear-transcribed mRNA catabolic process, nonsense-mediated decay                                                                                                                                 |
| insulin degrading enzyme                                             | Ide            | NP_112419    | 118      | 1             | cytoplasm                                                                                                       | ATP binding, catalytic activity, hydrolase activity, metal ion binding, metalloendopeptidase activity, metallopeptidase activity, nucleotide binding, peptidase activity, zinc ion binding | proteolysis                                                                                                                                                                                         |
| solute carrier family 12 (potassium/chloride transporters), member 9 | Slc12a9        | NP_113583    | 96       | 1             | integral to membrane, membrane, plasma membrane                                                                 | not classified                                                                                                                                                                             | transport                                                                                                                                                                                           |
| sarcolemma associated protein                                        | Slmap          | NP_114397    | 94       | 1             | cytoplasm, integral to membrane, membrane, plasma membrane, prefoldin complex                                   | unfolded protein binding                                                                                                                                                                   | protein folding                                                                                                                                                                                     |
| sterol regulatory element binding factor 2                           | Sreb2          | NP_150087    | 123      | 1             | cytoplasm, cytoplasmic vesicle, endoplasmic reticulum, Golgi apparatus, integral to membrane, membrane, nucleus | DNA binding, protein binding, sequence-specific DNA binding, transcription factor activity, transcription regulator activity                                                               | cholesterol metabolic process, lipid metabolic process, positive regulation of transcription from RNA polymerase II promoter, regulation of transcription, steroid metabolic process, transcription |
| suppressor of Ty 16 homolog                                          | Supt16h        | NP_291096    | 120      | 1             | chromosome, nucleus                                                                                             | not classified                                                                                                                                                                             | cellular process, DNA repair, DNA replication, regulation of transcription, response to DNA damage stimulus, transcription                                                                          |
| 1-acylglycerol-3-phosphate O-acyltransferase 3                       | Agpat3         | NP_443747    | 43       | 1             | integral to membrane, membrane                                                                                  | 1-acylglycerol-3-phosphate O-acyltransferase activity, acyltransferase activity, transferase activity                                                                                      | metabolic process, phospholipid biosynthetic process                                                                                                                                                |
| protocadherin beta 16                                                | Pcdhb16        | NP_444371    | 89       | 1             | integral to membrane, membrane                                                                                  | calcium ion binding, protein binding                                                                                                                                                       | calcium-dependent cell-cell adhesion, cell adhesion, synapse assembly, synaptic transmission                                                                                                        |
| Musashi homolog 2                                                    | Msi2           | NP_473384    | 37       | 1             | cytoplasm, polysome                                                                                             | nucleic acid binding, nucleotide binding, poly(U) RNA binding, RNA binding, single-stranded RNA binding                                                                                    | biological_process, stem cell development                                                                                                                                                           |

| Protein Name                                | Gene Name | Accession No | Mw (kDa) | Peptide Count | GO Component                                                                                                 | GO Function                                                                                                                                                                                                                                                | GO Process                                                                                                                                                                                                                                                                                                                        |
|---------------------------------------------|-----------|--------------|----------|---------------|--------------------------------------------------------------------------------------------------------------|------------------------------------------------------------------------------------------------------------------------------------------------------------------------------------------------------------------------------------------------------------|-----------------------------------------------------------------------------------------------------------------------------------------------------------------------------------------------------------------------------------------------------------------------------------------------------------------------------------|
| proline synthetase co-transcribed isoform a | Prosc     | NP_473398    | 30       | 1             | cellular_component                                                                                           | molecular_function                                                                                                                                                                                                                                         | biological_process                                                                                                                                                                                                                                                                                                                |
| metastasis associated 1                     | Mta1      | NP_473422    | 79       | 1             | cytoplasm, nucleus, NuRD complex                                                                             | DNA binding, metal ion binding, protein binding, sequence-specific DNA binding, transcription factor activity, zinc ion binding                                                                                                                            | regulation of transcription, DNA-dependent                                                                                                                                                                                                                                                                                        |
| HLA-B-associated transcript 3               | Bat3      | NP_476512    | 121      | 1             | cytoplasm, nucleus                                                                                           | not classified                                                                                                                                                                                                                                             | apoptosis, regulation of apoptosis                                                                                                                                                                                                                                                                                                |
| protein O-fucosyltransferase 1 isoform 1    | Pofut1    | NP_536711    | 45       | 1             | endoplasmic reticulum, integral to Golgi membrane                                                            | fucosyltransferase activity, manganese ion binding, peptide-O-fucosyltransferase activity, transferase activity, transferase activity, transferring glycosyl groups                                                                                        | angiogenesis, carbohydrate metabolic process, fucose metabolic process, heart development, nervous system development, Notch signaling pathway, protein amino acid O-linked glycosylation, somitogenesis                                                                                                                          |
| inositol 1,4,5-triphosphate receptor 3      | Itp3      | NP_542120    | 304      | 1             | cytoplasm, endoplasmic reticulum, integral to membrane, membrane, microsome, nucleolus, nucleoplasm, nucleus | calcium channel activity, calcium ion binding, inositol 1,4,5-trisphosphate-sensitive calcium-release channel activity, inositol-1,4,5-trisphosphate receptor activity, ion channel activity, phosphoinositide binding, protein binding, receptor activity | calcium ion transport, ion transport, sensory perception of bitter taste, sensory perception of sweet taste, sensory perception of umami taste, transport                                                                                                                                                                         |
| proteasome 26S non-ATPase subunit 5         | Psm5      | NP_542121    | 56       | 1             | proteasome complex                                                                                           | binding                                                                                                                                                                                                                                                    | not classified                                                                                                                                                                                                                                                                                                                    |
| ubiquitin-conjugating enzyme E2N            | Ube2n     | NP_542127    | 17       | 1             | nucleus                                                                                                      | ATP binding, ligase activity, nucleotide binding, protein binding, small conjugating protein ligase activity, ubiquitin-protein ligase activity                                                                                                            | DNA repair, modification-dependent protein catabolic process, positive regulation of NF-kappaB transcription factor activity, post-translational protein modification, regulation of protein metabolic process, response to DNA damage stimulus, T cell receptor signaling pathway, ubiquitin-dependent protein catabolic process |
| zinc finger protein 87                      | Zfp87     | NP_573491    | 63       | 1             | nucleus                                                                                                      | metal ion binding, zinc ion binding                                                                                                                                                                                                                        | transcription                                                                                                                                                                                                                                                                                                                     |
| acetyl-Coenzyme A carboxylase alpha         | Acaca     | NP_579938    | 265      | 1             | cytoplasm                                                                                                    | acetyl-CoA carboxylase activity, ATP binding, biotin binding, biotin carboxylase activity, catalytic activity, ligase activity, manganese ion binding, metal ion binding, nucleotide binding, protein binding                                              | fatty acid biosynthetic process, lipid biosynthetic process, lipid homeostasis, lipid metabolic process, metabolic process, multicellular organismal protein metabolic process, tissue homeostasis                                                                                                                                |
| optic atrophy 1 homolog                     | Opa1      | NP_598513    | 111      | 1             | integral to membrane, membrane, mitochondrial inner membrane, mitochondrion                                  | GTP binding, GTPase activity, nucleotide binding                                                                                                                                                                                                           | apoptosis, response to stimulus, visual perception                                                                                                                                                                                                                                                                                |
| aarF domain containing kinase 4             | Adck4     | NP_598531    | 59       | 1             | cellular_component, integral to membrane, membrane                                                           | kinase activity, molecular_function, protein serine/threonine kinase activity, transferase activity                                                                                                                                                        | biological_process                                                                                                                                                                                                                                                                                                                |
| nuclear pore complex-associated protein Tpr | Tpr       | NP_598541    | 267      | 1             | nuclear envelope                                                                                             | molecular_function                                                                                                                                                                                                                                         | biological_process                                                                                                                                                                                                                                                                                                                |
| NMD3 homolog                                | Nmd3      | NP_598548    | 58       | 1             | cytoplasm, nucleus                                                                                           | ribosomal large subunit binding                                                                                                                                                                                                                            | protein transport, ribosomal large subunit export from nucleus, transport                                                                                                                                                                                                                                                         |

| Protein Name                                              | Gene Name      | Accession No | Mw (kDa) | Peptide Count | GO Component                                                                | GO Function                                                                                                                                                                                                                                                                                                                                                                                                                                    | GO Process                                                                                                                                                                                           |
|-----------------------------------------------------------|----------------|--------------|----------|---------------|-----------------------------------------------------------------------------|------------------------------------------------------------------------------------------------------------------------------------------------------------------------------------------------------------------------------------------------------------------------------------------------------------------------------------------------------------------------------------------------------------------------------------------------|------------------------------------------------------------------------------------------------------------------------------------------------------------------------------------------------------|
| dipeptidyl peptidase III                                  | Dpp3           | NP_598564    | 83       | 1             | cytoplasm                                                                   | aminopeptidase activity, dipeptidyl-peptidase activity, hydrolase activity, metal ion binding, metallopeptidase activity, peptidase activity, zinc ion binding                                                                                                                                                                                                                                                                                 | proteolysis                                                                                                                                                                                          |
| histamine receptor H3                                     | Hrh3           | NP_598610    | 49       | 1             | integral to membrane, membrane, plasma membrane                             | G-protein coupled receptor activity, histamine receptor activity, receptor activity, signal transducer activity                                                                                                                                                                                                                                                                                                                                | G-protein coupled receptor protein signaling pathway, signal transduction                                                                                                                            |
| regulator of chromosome condensation 1                    | Rcc1           | NP_598639    | 45       | 1             | cellular_component, cytoplasm, nucleus                                      | guanyl-nucleotide exchange factor activity, Ran guanyl-nucleotide exchange factor activity                                                                                                                                                                                                                                                                                                                                                     | biological_process, cell cycle, cell division, mitosis                                                                                                                                               |
| transcriptional adaptor 3-like                            | Tada3l         | NP_598693    | 49       | 1             | nucleus, STAGA complex                                                      | ligand-dependent nuclear receptor transcription coactivator activity, protein binding                                                                                                                                                                                                                                                                                                                                                          | regulation of transcription, transcription                                                                                                                                                           |
| KDEL endoplasmic reticulum protein retention receptor 1   | Kdelr1         | NP_598711    | 25       | 1             | endoplasmic reticulum, integral to membrane, membrane                       | ER retention sequence binding, receptor activity                                                                                                                                                                                                                                                                                                                                                                                               | protein retention in ER lumen, protein transport, transport, vesicle-mediated transport                                                                                                              |
| acyl-CoA thioesterase 4                                   | Acot4          | NP_599008    | 46       | 1             | peroxisome                                                                  | acyl-CoA thioesterase activity, carboxylesterase activity, hydrolase activity, palmitoyl-CoA hydrolase activity, thiolester hydrolase activity                                                                                                                                                                                                                                                                                                 | acyl-CoA metabolic process, dicarboxylic acid metabolic process, lipid metabolic process, short-chain fatty acid metabolic process, succinyl-CoA metabolic process                                   |
| glycine decarboxylase                                     | Gldc           | NP_613061    | 113      | 1             | mitochondrion                                                               | catalytic activity, glycine dehydrogenase (decarboxylating) activity, oxidoreductase activity, protein homodimerization activity, pyridoxal phosphate binding                                                                                                                                                                                                                                                                                  | glycine decarboxylation via glycine cleavage system, glycine metabolic process, oxidation reduction                                                                                                  |
| translocase of outer mitochondrial membrane 70 homolog A  | Tomm70a        | NP_613065    | 68       | 1             | integral to membrane, membrane, mitochondrial outer membrane, mitochondrion | binding, protein binding                                                                                                                                                                                                                                                                                                                                                                                                                       | not classified                                                                                                                                                                                       |
| ATPase, H+/K+ transporting, nongastric, alpha polypeptide | Atp12a         | NP_619593    | 115      | 1             | integral to membrane, membrane                                              | ATP binding, ATPase activity, coupled to transmembrane movement of ions, phosphorylative mechanism, catalytic activity, hydrogen:potassium-exchanging ATPase activity, hydrolase activity, hydrolase activity, acting on acid anhydrides, catalyzing transmembrane movement of substances, magnesium ion binding, metal ion binding, monovalent inorganic cation transmembrane transporter activity, nucleotide binding, potassium ion binding | ATP biosynthetic process, cation transport, ion transport, metabolic process, monovalent inorganic cation transport, potassium ion homeostasis, potassium ion transport, proton transport, transport |
| hypothetical protein LOC192136                            | 5033411D12 Rik | NP_619595    | 48       | 1             | cellular_component                                                          | catalytic activity, molecular_function, transferase activity                                                                                                                                                                                                                                                                                                                                                                                   | biological_process, metabolic process                                                                                                                                                                |
| pre-mRNA processing factor 8                              | Prpf8          | NP_619600    | 274      | 1             | nucleus, ribonucleoprotein complex, spliceosomal complex, U5 snRNP          | protein binding, RNA binding                                                                                                                                                                                                                                                                                                                                                                                                                   | mRNA processing, nuclear mRNA splicing, via spliceosome, RNA splicing                                                                                                                                |

| Protein Name                                                      | Gene Name | Accession No | Mw (kDa) | Peptide Count | GO Component                                                       | GO Function                                                                                                                                                                                                                                                                                                                     | GO Process                                                                                                                                                                                                                                                                                           |
|-------------------------------------------------------------------|-----------|--------------|----------|---------------|--------------------------------------------------------------------|---------------------------------------------------------------------------------------------------------------------------------------------------------------------------------------------------------------------------------------------------------------------------------------------------------------------------------|------------------------------------------------------------------------------------------------------------------------------------------------------------------------------------------------------------------------------------------------------------------------------------------------------|
| methylenetetrahydrofolate dehydrogenase 1                         | Mthfd1    | NP_620084    | 101      | 1             | cytoplasm, mitochondrion                                           | ATP binding, binding, catalytic activity, formate-tetrahydrofolate ligase activity, formyltetrahydrofolate dehydrogenase activity, hydrolase activity, ligase activity, methenyltetrahydrofolate cyclohydrolase activity, methylenetetrahydrofolate dehydrogenase (NADP+) activity, nucleotide binding, oxidoreductase activity | cellular amino acid biosynthetic process, folic acid and derivative biosynthetic process, histidine biosynthetic process, histidine catabolic process, metabolic process, methionine biosynthetic process, one-carbon metabolic process, oxidation reduction, purine nucleotide biosynthetic process |
| coronin, actin binding protein 6 isoform B                        | Coro6     | NP_624356    | 53       | 1             | cellular_component                                                 | molecular_function                                                                                                                                                                                                                                                                                                              | biological_process                                                                                                                                                                                                                                                                                   |
| chloride channel calcium activated 4                              | Clca4     | NP_631887    | 113      | 1             | not classified                                                     | not classified                                                                                                                                                                                                                                                                                                                  | not classified                                                                                                                                                                                                                                                                                       |
| pigpen                                                            | Fus       | NP_631888    | 53       | 1             | cytoplasm, intracellular, nucleus                                  | DNA binding, metal ion binding, nucleic acid binding, RNA binding, transcription activator activity, zinc ion binding                                                                                                                                                                                                           | positive regulation of transcription from RNA polymerase II promoter                                                                                                                                                                                                                                 |
| UDP-glucose pyrophosphorylase 2                                   | Ugp2      | NP_647458    | 57       | 1             | cytoplasm                                                          | nucleotidyltransferase activity, transferase activity, UTP:glucose-1-phosphate uridylyltransferase activity                                                                                                                                                                                                                     | metabolic process                                                                                                                                                                                                                                                                                    |
| phosphoribosyl pyrophosphate synthetase-associated protein 2      | Prpsap2   | NP_659055    | 41       | 1             | not classified                                                     | magnesium ion binding, ribose phosphate diphosphokinase activity                                                                                                                                                                                                                                                                | nucleoside metabolic process, nucleotide biosynthetic process                                                                                                                                                                                                                                        |
| cat eye syndrome chromosome region, candidate 5 homolog precursor | Cecr5     | NP_659064    | 46       | 1             | not classified                                                     | hydrolase activity                                                                                                                                                                                                                                                                                                              | metabolic process                                                                                                                                                                                                                                                                                    |
| cold shock domain containing E1, RNA binding                      | Csde1     | NP_659150    | 89       | 1             | cytoplasm, mitochondrial inner membrane                            | DNA binding, nucleic acid binding, RNA binding                                                                                                                                                                                                                                                                                  | regulation of transcription, DNA-dependent                                                                                                                                                                                                                                                           |
| cysteine sulfinic acid decarboxylase                              | Csad      | NP_659191    | 55       | 1             | cellular_component                                                 | carboxy-lyase activity, catalytic activity, lyase activity, pyridoxal phosphate binding, sulfinoalanine decarboxylase activity                                                                                                                                                                                                  | carboxylic acid metabolic process, L-cysteine catabolic process to taurine, taurine metabolic process                                                                                                                                                                                                |
| peptidylprolyl isomerase-like 2                                   | Ppil2     | NP_659203    | 59       | 1             | nucleus, ubiquitin ligase complex                                  | isomerase activity, peptidyl-prolyl cis-trans isomerase activity, ubiquitin-protein ligase activity, ubiquitin-ubiquitin ligase activity                                                                                                                                                                                        | protein folding, protein polyubiquitination, protein ubiquitination                                                                                                                                                                                                                                  |
| huntingtin interacting protein 1 related                          | Hip1r     | NP_659507    | 119      | 1             | coated pit, cytoplasm, cytoplasmic vesicle, cytoskeleton, membrane | actin binding, phospholipid binding                                                                                                                                                                                                                                                                                             | endocytosis, receptor-mediated endocytosis                                                                                                                                                                                                                                                           |
| lysophosphatidylcholine acyltransferase 3                         | Lpcat3    | NP_660112    | 56       | 1             | endoplasmic reticulum, integral to membrane, membrane              | 1-acylglycerophosphocholine O-acyltransferase activity, acyltransferase activity, transferase activity                                                                                                                                                                                                                          | phospholipid biosynthetic process                                                                                                                                                                                                                                                                    |
| pitrilysin metallopeptidase 1                                     | Pitrm1    | NP_660113    | 117      | 1             | mitochondrion                                                      | catalytic activity, hydrolase activity, metal ion binding, metalloendopeptidase activity, metallopeptidase activity, peptidase activity, zinc ion binding                                                                                                                                                                       | proteolysis                                                                                                                                                                                                                                                                                          |
| hypothetical protein LOC28088                                     | D10Wsu52e | NP_663397    | 55       | 1             | cellular_component                                                 | molecular_function                                                                                                                                                                                                                                                                                                              | biological_process                                                                                                                                                                                                                                                                                   |
| glutathione peroxidase 6                                          | Gpx6      | NP_663426    | 25       | 1             | extracellular region                                               | glutathione peroxidase activity, oxidoreductase activity, peroxidase activity                                                                                                                                                                                                                                                   | oxidation reduction, response to oxidative stress                                                                                                                                                                                                                                                    |

| Protein Name                                           | Gene Name | Accession No | Mw (kDa) | Peptide Count | GO Component                                                                                              | GO Function                                                                                                                                                                                          | GO Process                                                                                                                                                                                                                                                   |
|--------------------------------------------------------|-----------|--------------|----------|---------------|-----------------------------------------------------------------------------------------------------------|------------------------------------------------------------------------------------------------------------------------------------------------------------------------------------------------------|--------------------------------------------------------------------------------------------------------------------------------------------------------------------------------------------------------------------------------------------------------------|
| pyruvate dehydrogenase kinase, isoenzyme 3             | Pdk3      | NP_663605    | 48       | 1             | mitochondrion                                                                                             | ATP binding, kinase activity, nucleotide binding, protein histidine kinase activity, pyruvate dehydrogenase (acetyltransferase) kinase activity, transferase activity, two-component sensor activity | carbohydrate metabolic process, glucose metabolic process, peptidyl-histidine phosphorylation, signal transduction                                                                                                                                           |
| centrosomal protein 290                                | Cep290    | NP_666121    | 290      | 1             | cell projection, centrosome, cilium, nucleus, photoreceptor connecting cilium                             | protein binding                                                                                                                                                                                      | cell projection organization, protein transport, regulation of transcription, transcription, transport                                                                                                                                                       |
| transcription factor B1, mitochondrial                 | Tfb1m     | NP_666186    | 39       | 1             | mitochondrion                                                                                             | DNA binding, methyltransferase activity, rRNA (adenine-N6,N6)-dimethyltransferase activity, rRNA methyltransferase activity, transferase activity                                                    | regulation of transcription, rRNA modification, rRNA processing, transcription                                                                                                                                                                               |
| splicing factor, arginine/serine-rich 7                | Sfrs7     | NP_666195    | 27       | 1             | nucleus                                                                                                   | metal ion binding, nucleic acid binding, nucleotide binding, protein binding, RNA binding, zinc ion binding                                                                                          | mRNA processing, RNA splicing                                                                                                                                                                                                                                |
| ARP1 actin-related protein 1 homolog B                 | Actr1b    | NP_666219    | 42       | 1             | cytoplasm, cytoskeleton                                                                                   | ATP binding, nucleotide binding, protein binding                                                                                                                                                     | not classified                                                                                                                                                                                                                                               |
| inorganic pyrophosphatase 2                            | Ppa2      | NP_666253    | 38       | 1             | cytoplasm, mitochondrion                                                                                  | hydrolase activity, inorganic diphosphatase activity, magnesium ion binding, metal ion binding                                                                                                       | phosphate metabolic process                                                                                                                                                                                                                                  |
| acetyl-Coenzyme A acyltransferase 1B                   | Acaa1b    | NP_666342    | 44       | 1             | not classified                                                                                            | acyltransferase activity, transferase activity                                                                                                                                                       | not classified                                                                                                                                                                                                                                               |
| olfactory receptor 121                                 | Olf121    | NP_666840    | 35       | 1             | integral to membrane                                                                                      | G-protein coupled receptor activity, olfactory receptor activity, receptor activity, signal transducer activity                                                                                      | G-protein coupled receptor protein signaling pathway, sensory perception of smell, signal transduction                                                                                                                                                       |
| T-cell activation GTPase activating protein 1          | Tagap1    | NP_671511    | 56       | 1             | not classified                                                                                            | not classified                                                                                                                                                                                       | not classified                                                                                                                                                                                                                                               |
| ATP-binding cassette, sub-family A (ABC1), member 5    | Abca5     | NP_671752    | 186      | 1             | endosome, Golgi apparatus, integral to membrane, lysosome, membrane                                       | ATP binding, ATPase activity, nucleoside-triphosphatase activity, nucleotide binding                                                                                                                 | transport                                                                                                                                                                                                                                                    |
| ATP-binding cassette transporter sub-family A member 9 | Abca9     | NP_671753    | 183      | 1             | integral to membrane, membrane                                                                            | ATP binding, ATPase activity, nucleoside-triphosphatase activity, nucleotide binding                                                                                                                 | transport                                                                                                                                                                                                                                                    |
| nodal modulator 1                                      | Nomo1     | NP_694697    | 133      | 1             | not classified                                                                                            | not classified                                                                                                                                                                                       | not classified                                                                                                                                                                                                                                               |
| angiotenin                                             | Amot      | NP_695231    | 95       | 1             | cell junction, endocytic vesicle, external side of plasma membrane, lamellipodium, ruffle, tight junction | receptor activity                                                                                                                                                                                    | cell migration involved in gastrulation, chemotaxis, gastrulation with mouth forming second, in utero embryonic development, negative regulation of angiogenesis, positive regulation of embryonic development, regulation of cell migration, vasculogenesis |
| BCL2-like 13                                           | Bcl2l13   | NP_705736    | 47       | 1             | integral to membrane, membrane, mitochondrion                                                             | not classified                                                                                                                                                                                       | apoptosis, regulation of apoptosis                                                                                                                                                                                                                           |
| transmembrane protein 41B                              | Tmem41b   | NP_705745    | 32       | 1             | integral to membrane, membrane                                                                            | not classified                                                                                                                                                                                       | not classified                                                                                                                                                                                                                                               |
| quiescins Q6 sulfhydryl oxidase 2                      | Qsox2     | NP_705787    | 71       | 1             | integral to membrane, membrane                                                                            | oxidoreductase activity, thiol oxidase activity                                                                                                                                                      | cell redox homeostasis, oxidation reduction                                                                                                                                                                                                                  |
| non-imprinted in Prader-Willi/Angelman syndrome 1      | Nipa1     | NP_705806    | 34       | 1             | integral to membrane, membrane                                                                            | not classified                                                                                                                                                                                       | not classified                                                                                                                                                                                                                                               |



| Protein Name                                                  | Gene Name     | Accession No | Mw (kDa) | Peptide Count | GO Component                                                                              | GO Function                                                                                                                                                                                                           | GO Process                                                                                                                                          |
|---------------------------------------------------------------|---------------|--------------|----------|---------------|-------------------------------------------------------------------------------------------|-----------------------------------------------------------------------------------------------------------------------------------------------------------------------------------------------------------------------|-----------------------------------------------------------------------------------------------------------------------------------------------------|
| CKLF-like MARVEL transmembrane domain containing 4            | Cmtm4         | NP_705810    | 23       | 1             | extracellular space, integral to membrane, membrane                                       | cytokine activity                                                                                                                                                                                                     | chemotaxis                                                                                                                                          |
| MHC I like leukocyte 1                                        | Mill1         | NP_715630    | 45       | 1             | not classified                                                                            | not classified                                                                                                                                                                                                        | not classified                                                                                                                                      |
| isoleucyl-tRNA synthetase                                     | Iars          | NP_742012    | 144      | 1             | cytoplasm                                                                                 | aminoacyl-tRNA ligase activity, ATP binding, isoleucine-tRNA ligase activity, ligase activity, nucleotide binding, zinc ion binding                                                                                   | isoleucyl-tRNA aminoacylation, translation, tRNA aminoacylation for protein translation                                                             |
| ribosomal protein L32                                         | Rpl32         | NP_742083    | 16       | 1             | cytosolic large ribosomal subunit, intracellular, ribonucleoprotein complex, ribosome     | structural constituent of ribosome                                                                                                                                                                                    | translation                                                                                                                                         |
| ectonucleoside triphosphate diphosphohydrolase 6              | Entpd6        | NP_742115    | 50       | 1             | not classified                                                                            | hydrolase activity                                                                                                                                                                                                    | not classified                                                                                                                                      |
| nucleoporin 93                                                | Nup93         | NP_765998    | 93       | 1             | nuclear pore, nucleus                                                                     | not classified                                                                                                                                                                                                        | mRNA transport, protein transport, transmembrane transport, transport                                                                               |
| THO complex 5                                                 | Thoc5         | NP_766026    | 79       | 1             | cellular_component, cytoplasm, nucleus                                                    | protein binding                                                                                                                                                                                                       | cell differentiation, negative regulation of macrophage differentiation                                                                             |
| solute carrier family 38, member 5                            | Slc38a5       | NP_766067    | 53       | 1             | integral to membrane, membrane, plasma membrane                                           | not classified                                                                                                                                                                                                        | not classified                                                                                                                                      |
| RUN and FYVE domain containing 1                              | Rufy1         | NP_766145    | 80       | 1             | cytoplasm, cytosol, endosome, late endosome, membrane                                     | lipid binding, metal ion binding, protein binding, protein transporter activity, zinc ion binding                                                                                                                     | endocytosis, protein transport, regulation of endocytosis, transport                                                                                |
| pyruvate dehydrogenase kinase, isoenzyme 1                    | Pdk1          | NP_766253    | 49       | 1             | mitochondrion, plasma membrane                                                            | ATP binding, kinase activity, nucleotide binding, protein binding, protein histidine kinase activity, pyruvate dehydrogenase (acetyltransfering) kinase activity, transferase activity, two-component sensor activity | carbohydrate metabolic process, glucose metabolic process, intracellular signaling cascade, peptidyl-histidine phosphorylation, signal transduction |
| zinc metalloproteinase, STE24 homolog                         | Zmpste24      | NP_766288    | 55       | 1             | endoplasmic reticulum, Golgi apparatus, integral to membrane, membrane, membrane fraction | hydrolase activity, metal ion binding, metalloendopeptidase activity, metallopeptidase activity, peptidase activity, zinc ion binding                                                                                 | nuclear envelope organization, prenylated protein catabolic process, proteolysis                                                                    |
| DnaJ (Hsp40) homolog, subfamily C, member 11                  | Dnajc11       | NP_766292    | 63       | 1             | mitochondrial inner membrane                                                              | heat shock protein binding, molecular_function                                                                                                                                                                        | biological_process                                                                                                                                  |
| protein phosphatase 1, catalytic subunit, beta isoform        | Ppp1cb        | NP_766295    | 37       | 1             | cytoplasm                                                                                 | hydrolase activity, iron ion binding, manganese ion binding, metal ion binding, phosphoprotein phosphatase activity, protein binding, protein serine/threonine phosphatase activity                                   | carbohydrate metabolic process, cell cycle, cell division, glycogen metabolic process, protein amino acid dephosphorylation                         |
| ubiquitin-like modifier activating enzyme 6                   | Uba6          | NP_766300    | 118      | 1             | not classified                                                                            | ATP binding, binding, catalytic activity, ligase activity, nucleotide binding, small protein activating enzyme activity                                                                                               | metabolic process, modification-dependent protein catabolic process, protein modification process                                                   |
| engulfment and cell motility 3, ced-12 homolog                | Elmo3         | NP_766348    | 82       | 1             | cytoplasm, cytoskeleton                                                                   | protein binding, SH3 domain binding                                                                                                                                                                                   | apoptosis, phagocytosis                                                                                                                             |
| solute carrier family 9 (sodium/hydrogen exchanger), member 6 | Slc9a6        | NP_766368    | 78       | 1             | integral to membrane, mitochondrion                                                       | antiporter activity                                                                                                                                                                                                   | ion transport, sodium ion transport, transport                                                                                                      |
| contactin associated protein-like 5                           | C230078M14Rik | NP_766439    | 144      | 1             | integral to membrane, membrane                                                            | protein binding, receptor binding                                                                                                                                                                                     | cell adhesion, signal transduction                                                                                                                  |

| Protein Name                                               | Gene Name | Accession No | Mw (kDa) | Peptide Count | GO Component                                         | GO Function                                                                                                                                                                                                                                                                                                                                                             | GO Process                                                                                                                                                                                                                                                                                                                                                                                                                                                                                         |
|------------------------------------------------------------|-----------|--------------|----------|---------------|------------------------------------------------------|-------------------------------------------------------------------------------------------------------------------------------------------------------------------------------------------------------------------------------------------------------------------------------------------------------------------------------------------------------------------------|----------------------------------------------------------------------------------------------------------------------------------------------------------------------------------------------------------------------------------------------------------------------------------------------------------------------------------------------------------------------------------------------------------------------------------------------------------------------------------------------------|
| poly (ADP-ribose) polymerase family, member 12             | Parp12    | NP_766481    | 80       | 1             | nucleus                                              | metal ion binding, NAD+ ADP-ribosyltransferase activity, nucleic acid binding, transferase activity, zinc ion binding                                                                                                                                                                                                                                                   | not classified                                                                                                                                                                                                                                                                                                                                                                                                                                                                                     |
| carbonyl reductase 3                                       | Cbr3      | NP_766635    | 31       | 1             | not classified                                       | oxidoreductase activity                                                                                                                                                                                                                                                                                                                                                 | oxidation reduction                                                                                                                                                                                                                                                                                                                                                                                                                                                                                |
| ubiquitin carboxyl-terminal hydrolase CYLD isoform b       | Cyld      | NP_775545    | 107      | 1             | cytoplasm, intracellular, ribosome                   | cysteine-type peptidase activity, hydrolase activity, peptidase activity, protein binding, structural constituent of ribosome, ubiquitin thiolesterase activity                                                                                                                                                                                                         | modification-dependent protein catabolic process, translation, ubiquitin-dependent protein catabolic process                                                                                                                                                                                                                                                                                                                                                                                       |
| hexose-6-phosphate dehydrogenase (glucose 1-dehydrogenase) | H6pd      | NP_775547    | 90       | 1             | endoplasmic reticulum, microsome                     | 6-phosphogluconolactonase activity, binding, catalytic activity, glucose 1-dehydrogenase activity, glucose-6-phosphate dehydrogenase activity, hydrolase activity, oxidoreductase activity                                                                                                                                                                              | carbohydrate metabolic process, glucose metabolic process, metabolic process, oxidation reduction, pentose-phosphate shunt                                                                                                                                                                                                                                                                                                                                                                         |
| leprecan-like 1                                            | Leprel1   | NP_775555    | 80       | 1             | endoplasmic reticulum, Golgi apparatus               | iron ion binding, L-ascorbic acid binding, metal ion binding, oxidoreductase activity, oxidoreductase activity, acting on paired donors, with incorporation or reduction of molecular oxygen, oxidoreductase activity, acting on single donors with incorporation of molecular oxygen, incorporation of two atoms of oxygen, procollagen-proline 3-dioxygenase activity | oxidation reduction                                                                                                                                                                                                                                                                                                                                                                                                                                                                                |
| LanC lantibiotic synthetase component C-like 3             | Lanc13    | NP_775590    | 46       | 1             | not classified                                       | not classified                                                                                                                                                                                                                                                                                                                                                          | not classified                                                                                                                                                                                                                                                                                                                                                                                                                                                                                     |
| centromere protein E                                       | Cenpe     | NP_776123    | 286      | 1             | chromosome, centromeric region                       | ATP binding, kinetochore binding, microtubule motor activity, motor activity, nucleotide binding, protein binding, protein kinase binding                                                                                                                                                                                                                               | attachment of spindle microtubules to kinetochore, cell cycle, cell division, establishment of protein localization, microtubule-based movement, mitosis, mitotic cell cycle spindle assembly checkpoint, multicellular organismal development, positive regulation of attachment of spindle microtubules to kinetochore, positive regulation of mitotic metaphase/anaphase transition, positive regulation of protein kinase activity, regulation of developmental process, regulation of mitosis |
| RAB6B, member RAS oncogene family                          | Rab6b     | NP_776142    | 23       | 1             | Golgi apparatus, membrane                            | GTP binding, nucleotide binding                                                                                                                                                                                                                                                                                                                                         | protein transport, small GTPase mediated signal transduction, transport, vesicle-mediated transport                                                                                                                                                                                                                                                                                                                                                                                                |
| RCC1-like                                                  | Rcc2      | NP_776292    | 56       | 1             | chromosome, centromeric region, microtubule, nucleus | not classified                                                                                                                                                                                                                                                                                                                                                          | cell cycle, cell division, mitosis                                                                                                                                                                                                                                                                                                                                                                                                                                                                 |

| Protein Name                                              | Gene Name      | Accession No | Mw (kDa) | Peptide Count | GO Component                                           | GO Function                                                                                                                                                                                                           | GO Process                                                                                                                                       |
|-----------------------------------------------------------|----------------|--------------|----------|---------------|--------------------------------------------------------|-----------------------------------------------------------------------------------------------------------------------------------------------------------------------------------------------------------------------|--------------------------------------------------------------------------------------------------------------------------------------------------|
| NIMA (never in mitosis gene a)-related expressed kinase 1 | Nek1           | NP_780298    | 137      | 1             | cytoplasm, nucleus                                     | ATP binding, kinase activity, magnesium ion binding, metal ion binding, nucleotide binding, protein kinase activity, protein serine/threonine kinase activity, protein tyrosine kinase activity, transferase activity | cell cycle, cell division, mitosis, protein amino acid phosphorylation, response to DNA damage stimulus, response to ionizing radiation          |
| transmembrane protein 111                                 | Tmem111        | NP_780310    | 30       | 1             | integral to membrane, membrane                         | molecular_function                                                                                                                                                                                                    | biological_process                                                                                                                               |
| RAE1 RNA export 1 homolog                                 | Rae1           | NP_780321    | 41       | 1             | cytoplasm, nucleus                                     | not classified                                                                                                                                                                                                        | not classified                                                                                                                                   |
| Fe-containing alcohol dehydrogenase 1                     | Adhfe1         | NP_780445    | 50       | 1             | cellular_component, mitochondrion                      | hydroxyacid-oxoacid transhydrogenase activity, metal ion binding, oxidoreductase activity                                                                                                                             | oxidation reduction                                                                                                                              |
| EPM2A (laforin) interacting protein 1                     | Epm2aip1       | NP_780475    | 70       | 1             | cellular_component, endoplasmic reticulum              | molecular_function                                                                                                                                                                                                    | biological_process                                                                                                                               |
| acyl-Coenzyme A dehydrogenase family, member 11           | Acad11         | NP_780533    | 87       | 1             | peroxisome                                             | acyl-CoA dehydrogenase activity, electron carrier activity, FAD binding, oxidoreductase activity, oxidoreductase activity, acting on the CH-CH group of donors                                                        | metabolic process, oxidation reduction                                                                                                           |
| lactate dehydrogenase A-like 6B                           | Ldhal6b        | NP_780558    | 42       | 1             | not classified                                         | L-lactate dehydrogenase activity, oxidoreductase activity                                                                                                                                                             | glycolysis, oxidation reduction                                                                                                                  |
| aldehyde dehydrogenase 4 family, member A1                | Aldh4a1        | NP_780647    | 62       | 1             | mitochondrial matrix, mitochondrion                    | 1-pyrroline-5-carboxylate dehydrogenase activity, aldehyde dehydrogenase (NAD) activity, oxidoreductase activity                                                                                                      | metabolic process, oxidation reduction, proline biosynthetic process, proline metabolic process                                                  |
| SEC14 and spectrin domains 1                              | Sestd1         | NP_780674    | 79       | 1             | not classified                                         | protein binding                                                                                                                                                                                                       | not classified                                                                                                                                   |
| zinc finger, CCHC domain containing 11                    | Zcchc11        | NP_780681    | 185      | 1             | cytoplasm, nucleus                                     | protein binding                                                                                                                                                                                                       | cytokine production, negative regulation of NF-kappaB transcription factor activity, regulation of lipopolysaccharide-mediated signaling pathway |
| G protein-coupled receptor 150                            | Gpr150         | NP_780704    | 47       | 1             | integral to membrane, membrane, plasma membrane        | G-protein coupled receptor activity, receptor activity, signal transducer activity                                                                                                                                    | G-protein coupled receptor protein signaling pathway, signal transduction                                                                        |
| histone cluster 2, H2ac                                   | Hist2h2ac      | NP_783593    | 14       | 1             | chromosome, nucleosome, nucleus                        | DNA binding                                                                                                                                                                                                           | nucleosome assembly                                                                                                                              |
| Rho GTPase activating protein 18                          | Arhgap18       | NP_789807    | 75       | 1             | cellular_component, intracellular                      | GTPase activator activity, molecular_function                                                                                                                                                                         | biological_process, signal transduction                                                                                                          |
| fibronectin type III domain containing 7                  | Fndc7          | NP_796065    | 78       | 1             | extracellular region                                   | not classified                                                                                                                                                                                                        | not classified                                                                                                                                   |
| hypothetical protein LOC320351                            | D230037D09 Rik | NP_796114    | 19       | 1             | integral to membrane, membrane                         | not classified                                                                                                                                                                                                        | not classified                                                                                                                                   |
| LMBR1 domain containing 2                                 | Lmbrd2         | NP_796152    | 81       | 1             | cellular_component, integral to membrane, membrane     | molecular_function                                                                                                                                                                                                    | biological_process                                                                                                                               |
| solute carrier family 26, member 9                        | Slc26a9        | NP_796217    | 87       | 1             | apical plasma membrane, integral to membrane, membrane | anion:anion antiporter activity, bicarbonate transmembrane transporter activity, secondary active sulfate transmembrane transporter activity, transporter activity                                                    | bicarbonate transport, chloride transport, regulation of pH, sulfate transport, transport                                                        |
| ankyrin repeat domain 16                                  | Ankrd16        | NP_796242    | 21       | 1             | not classified                                         | not classified                                                                                                                                                                                                        | not classified                                                                                                                                   |
| ADP-ribosylation factor-like 11                           | Arl11          | NP_796311    | 19       | 1             | intracellular                                          | GTP binding, nucleotide binding                                                                                                                                                                                       | small GTPase mediated signal transduction                                                                                                        |

| Protein Name                                                           | Gene Name      | Accession No | Mw (kDa) | Peptide Count | GO Component                                                                       | GO Function                                                                                                                     | GO Process                                                                                                                                                                                                                                                                                                                |
|------------------------------------------------------------------------|----------------|--------------|----------|---------------|------------------------------------------------------------------------------------|---------------------------------------------------------------------------------------------------------------------------------|---------------------------------------------------------------------------------------------------------------------------------------------------------------------------------------------------------------------------------------------------------------------------------------------------------------------------|
| RAB5B, member RAS oncogene family                                      | Rab5b          | NP_803130    | 24       | 1             | endocytic vesicle, endosome, membrane, plasma membrane                             | GTP binding, GTPase activity, nucleotide binding                                                                                | endosome organization, protein transport, regulation of endocytosis, small GTPase mediated signal transduction, transport                                                                                                                                                                                                 |
| hypothetical protein LOC216516                                         | 4930562D19 Rik | NP_808284    | 68       | 1             | not classified                                                                     | not classified                                                                                                                  | not classified                                                                                                                                                                                                                                                                                                            |
| transmembrane protein 201 isoform b                                    | Tmem201        | NP_808340    | 44       | 1             | integral to membrane, membrane                                                     | not classified                                                                                                                  | not classified                                                                                                                                                                                                                                                                                                            |
| YTH domain containing 1                                                | Ythdc1         | NP_808348    | 86       | 1             | not classified                                                                     | not classified                                                                                                                  | not classified                                                                                                                                                                                                                                                                                                            |
| NACHT, leucine rich repeat and PYD containing 2                        | Nlrp2          | NP_808358    | 119      | 1             | not classified                                                                     | not classified                                                                                                                  | not classified                                                                                                                                                                                                                                                                                                            |
| transient receptor potential cation channel, subfamily A, member 1     | Trpa1          | NP_808449    | 128      | 1             | integral to membrane, membrane, stereocilium bundle                                | calcium channel activity, channel activity, ion channel activity                                                                | calcium ion transport, detection of chemical stimulus involved in sensory perception of pain, detection of mechanical stimulus involved in sensory perception of pain, ion transport, response to cold, response to drug, response to hydrogen peroxide, response to pain, response to stimulus, thermoception, transport |
| vacuolar protein sorting 26 homolog B                                  | Vps26b         | NP_821170    | 39       | 1             | cytoplasm, membrane, retromer complex                                              | not classified                                                                                                                  | protein transport, transport, vacuolar transport                                                                                                                                                                                                                                                                          |
| CDC23 (cell division cycle 23, yeast, homolog)                         | Cdc23          | NP_848124    | 69       | 1             | anaphase-promoting complex                                                         | binding                                                                                                                         | cell cycle, cell division, mitosis, modification-dependent protein catabolic process, regulation of mitotic metaphase/anaphase transition                                                                                                                                                                                 |
| solute carrier family 6 (neurotransmitter transporter, GABA), member 1 | Slc6a1         | NP_848818    | 67       | 1             | axon, integral to membrane, integral to plasma membrane, membrane, plasma membrane | gamma-aminobutyric acid:sodium symporter activity, neurotransmitter:sodium symporter activity, symporter activity               | neurotransmitter transport, transport                                                                                                                                                                                                                                                                                     |
| BCSC-1                                                                 | AW551984       | NP_848852    | 89       | 1             | not classified                                                                     | not classified                                                                                                                  | not classified                                                                                                                                                                                                                                                                                                            |
| Son cell proliferation protein                                         | Son            | NP_849211    | 266      | 1             | intracellular, nucleus                                                             | DNA binding, double-stranded RNA binding, nucleic acid binding, protein binding, RNA binding, RS domain binding                 | not classified                                                                                                                                                                                                                                                                                                            |
| AAA-ATPase TOB3                                                        | Atad3a         | NP_849534    | 67       | 1             | mitochondrial inner membrane, mitochondrion                                        | ATP binding, nucleoside-triphosphatase activity, nucleotide binding                                                             | not classified                                                                                                                                                                                                                                                                                                            |
| glycyl-tRNA synthetase                                                 | Gars           | NP_851009    | 82       | 1             | cytoplasm, secretory granule                                                       | aminoacyl-tRNA ligase activity, ATP binding, glycine-tRNA ligase activity, ligase activity, nucleotide binding, protein binding | glycyl-tRNA aminoacylation, regulated secretory pathway, translation, tRNA aminoacylation for protein translation                                                                                                                                                                                                         |
| carbonic anhydrase 5b, mitochondrial                                   | Car5b          | NP_851832    | 37       | 1             | mitochondrion                                                                      | carbonate dehydratase activity, lyase activity, metal ion binding, zinc ion binding                                             | one-carbon metabolic process                                                                                                                                                                                                                                                                                              |
| general transcription factor IIH, polypeptide 3                        | Gtf2h3         | NP_852075    | 34       | 1             | core TFIIH complex, nucleus                                                        | general RNA polymerase II transcription factor activity, metal ion binding, zinc ion binding                                    | DNA repair, regulation of transcription, regulation of transcription, DNA-dependent, response to DNA damage stimulus, transcription                                                                                                                                                                                       |
| 3-oxoacid CoA transferase 2B precursor                                 | Oxct2b         | NP_862907    | 57       | 1             | microtubule-based flagellum, mitochondrion                                         | 3-oxoacid CoA-transferase activity, CoA-transferase activity, transferase activity                                              | generation of precursor metabolites and energy, ketone body catabolic process, metabolic process                                                                                                                                                                                                                          |
| protein phosphatase 4, regulatory subunit 2                            | Ppp4r2         | NP_891984    | 46       | 1             | not classified                                                                     | not classified                                                                                                                  | mRNA processing, RNA splicing                                                                                                                                                                                                                                                                                             |

| Protein Name                                | Gene Name      | Accession No | Mw (kDa) | Peptide Count | GO Component                                                                                                                                    | GO Function                                                                                                                                                                                 | GO Process                                                                                                                                                                         |
|---------------------------------------------|----------------|--------------|----------|---------------|-------------------------------------------------------------------------------------------------------------------------------------------------|---------------------------------------------------------------------------------------------------------------------------------------------------------------------------------------------|------------------------------------------------------------------------------------------------------------------------------------------------------------------------------------|
| structure specific recognition protein 1    | Ssrp1          | NP_892035    | 81       | 1             | chromosome, nucleus                                                                                                                             | DNA binding                                                                                                                                                                                 | DNA repair, DNA replication, regulation of transcription, response to DNA damage stimulus, transcription                                                                           |
| zinc finger protein 300                     | Zfp300         | NP_899008    | 75       | 1             | nucleus                                                                                                                                         | metal ion binding, zinc ion binding                                                                                                                                                         | transcription                                                                                                                                                                      |
| ring finger protein 182                     | Rnf182         | NP_899027    | 27       | 1             | integral to membrane, membrane                                                                                                                  | metal ion binding, protein binding, zinc ion binding                                                                                                                                        | modification-dependent protein catabolic process                                                                                                                                   |
| hypothetical protein LOC331529              | EG331529       | NP_899143    | 53       | 1             | not classified                                                                                                                                  | not classified                                                                                                                                                                              | not classified                                                                                                                                                                     |
| reticulon 4 isoform B2                      | Rtn4           | NP_918942    | 40       | 1             | cell projection, cell soma, endoplasmic reticulum, integral to endoplasmic reticulum membrane, integral to membrane, membrane, nuclear envelope | not classified                                                                                                                                                                              | angiogenesis, negative regulation of anti-apoptosis, negative regulation of axon extension, nervous system development, regulation of cell migration                               |
| unc-84 homolog B                            | Unc84b         | NP_919323    | 78       | 1             | condensed nuclear chromosome, endosome, integral to membrane, membrane, nuclear chromosome, telomeric region, nuclear envelope, nucleus         | protein binding                                                                                                                                                                             | nuclear envelope organization                                                                                                                                                      |
| A kinase (PRKA) anchor protein (yotiao) 9   | Akap9          | NP_919444    | 434      | 1             | cytoplasm, pericentriolar material                                                                                                              | kinase activity, protein binding                                                                                                                                                            | not classified                                                                                                                                                                     |
| SLAIN motif family, member 1                | Slain1         | NP_932131    | 61       | 1             | not classified                                                                                                                                  | not classified                                                                                                                                                                              | not classified                                                                                                                                                                     |
| slingshot homolog 1                         | Ssh1           | NP_932777    | 115      | 1             | cytoplasm, cytoskeleton                                                                                                                         | actin binding, hydrolase activity, phosphatase activity, phosphoprotein phosphatase activity, protein tyrosine phosphatase activity, protein tyrosine/serine/threonine phosphatase activity | dephosphorylation, protein amino acid dephosphorylation                                                                                                                            |
| neurotrophin 5                              | Ntf5           | NP_937833    | 22       | 1             | endoplasmic reticulum lumen, extracellular region                                                                                               | growth factor activity, neurotrophin p75 receptor binding, receptor binding                                                                                                                 | adult locomotory behavior, epidermis development, ganglion mother cell fate determination, long-term memory, mechanoreceptor differentiation, sensory organ boundary specification |
| eukaryotic translation initiation factor 5B | Eif5b          | NP_938045    | 138      | 1             | cytoplasm                                                                                                                                       | GTP binding, GTPase activity, nucleotide binding, translation initiation factor activity                                                                                                    | translation                                                                                                                                                                        |
| zinc finger and AT hook domain containing   | Zfat           | NP_941046    | 136      | 1             | cytoplasm, intracellular, nucleus                                                                                                               | DNA binding, metal ion binding, nucleic acid binding, zinc ion binding                                                                                                                      | regulation of transcription, transcription                                                                                                                                         |
| coiled-coil domain containing 58            | Ccdc58         | NP_941047    | 17       | 1             | not classified                                                                                                                                  | not classified                                                                                                                                                                              | not classified                                                                                                                                                                     |
| isoleucine-tRNA synthetase 2, mitochondrial | Iars2          | NP_941055    | 113      | 1             | cytoplasm, mitochondrion                                                                                                                        | aminoacyl-tRNA ligase activity, ATP binding, catalytic activity, isoleucine-tRNA ligase activity, ligase activity, nucleotide binding, zinc ion binding                                     | isoleucyl-tRNA aminoacylation, translation, tRNA aminoacylation for protein translation                                                                                            |
| hypothetical protein LOC382137              | D630004A14 Rik | NP_941077    | 70       | 1             | cytoplasm                                                                                                                                       | ATP binding, magnesium ion binding, phenylalanine tRNA ligase activity, tRNA binding                                                                                                        | phenylalanyl-tRNA aminoacylation, tRNA processing                                                                                                                                  |

| Protein Name                                                                              | Gene Name     | Accession No | Mw (kDa) | Peptide Count | GO Component                                                          | GO Function                                                                                                                                                                                 | GO Process                                                                                                                                                                                                                                                                           |
|-------------------------------------------------------------------------------------------|---------------|--------------|----------|---------------|-----------------------------------------------------------------------|---------------------------------------------------------------------------------------------------------------------------------------------------------------------------------------------|--------------------------------------------------------------------------------------------------------------------------------------------------------------------------------------------------------------------------------------------------------------------------------------|
| zinc fingers and homeobox protein 2                                                       | Zhx2          | NP_955520    | 92       | 1             | cellular_component, intracellular, nucleus                            | DNA binding, metal ion binding, protein binding, sequence-specific DNA binding, transcription factor activity, transcription regulator activity, zinc ion binding                           | mRNA catabolic process, negative regulation of transcription from RNA polymerase II promoter, regulation of transcription, regulation of transcription from RNA polymerase II promoter, regulation of transcription, DNA-dependent, transcription                                    |
| delangin isoform B                                                                        | Nipbl         | NP_957684    | 304      | 1             | nucleus                                                               | not classified                                                                                                                                                                              | cell cycle                                                                                                                                                                                                                                                                           |
| cDNA sequence BC034664                                                                    | Lyrm4         | NP_958746    | 11       | 1             | mitochondrion                                                         | not classified                                                                                                                                                                              | not classified                                                                                                                                                                                                                                                                       |
| sphingosine kinase 2                                                                      | Sphk2         | NP_975009    | 66       | 1             | cytosol, membrane fraction                                            | ATP binding, D-erythro-sphingosine kinase activity, diacylglycerol kinase activity, kinase activity, nucleotide binding, protein binding, sphinganine kinase activity, transferase activity | activation of protein kinase C activity by G-protein coupled receptor protein signaling pathway, anti-apoptosis, blood vessel development, brain development, positive regulation of cell proliferation, sphinganine-1-phosphate biosynthetic process, sphingosine metabolic process |
| immunoglobulin superfamily, member 3                                                      | Igsf3         | NP_997088    | 135      | 1             | integral to membrane, membrane                                        | not classified                                                                                                                                                                              | not classified                                                                                                                                                                                                                                                                       |
| peptidoglycan recognition protein 4                                                       | Pglyrp4       | NP_997146    | 41       | 1             | extracellular region                                                  | N-acetylmuramoyl-L-alanine amidase activity, protein binding                                                                                                                                | defense response to bacterium, immune response, peptidoglycan catabolic process                                                                                                                                                                                                      |
| oxysterol binding protein-like 1                                                          | Osbpl1a       | NP_997413    | 108      | 1             | cellular_component                                                    | molecular_function                                                                                                                                                                          | lipid transport, steroid metabolic process, transport                                                                                                                                                                                                                                |
| angiotensin I converting enzyme (peptidyl-dipeptidase A) 1 isoform 1                      | Ace           | NP_997507    | 151      | 1             | extracellular region, integral to membrane, membrane, plasma membrane | carboxypeptidase activity, hydrolase activity, metal ion binding, metalloproteinase activity, peptidase activity, peptidyl dipeptidase activity, zinc ion binding                           | hormone catabolic process, proteolysis, regulation of blood pressure                                                                                                                                                                                                                 |
| MARVEL (membrane-associating) domain containing 3 isoform b                               | Marveld3      | NP_997612    | 44       | 1             | integral to membrane, membrane                                        | not classified                                                                                                                                                                              | not classified                                                                                                                                                                                                                                                                       |
| PREDICTED: heterogeneous nuclear ribonucleoprotein A0                                     | Hnrpa0        | XP_001001311 | 31       | 1             | not classified                                                        | not classified                                                                                                                                                                              | not classified                                                                                                                                                                                                                                                                       |
| PREDICTED: tubulin tyrosine ligase-like family, member 7 isoform 2                        | Tllf7         | XP_001005473 | 103      | 1             | cell projection, cilium                                               | ligase activity, tubulin-tyrosine ligase activity                                                                                                                                           | cell differentiation, multicellular organismal development, nervous system development, protein modification process                                                                                                                                                                 |
| PREDICTED: hypothetical protein                                                           | LOC100038847  | XP_001471557 | 24       | 1             | not classified                                                        | not classified                                                                                                                                                                              | not classified                                                                                                                                                                                                                                                                       |
| PREDICTED: hypothetical protein                                                           | LOC100044270  | XP_001471889 | 74       | 1             | not classified                                                        | not classified                                                                                                                                                                              | not classified                                                                                                                                                                                                                                                                       |
| PREDICTED: similar to novel KRAB box and zinc finger, C2H2 type domain containing protein | LOC100039109  | XP_001472332 | 9        | 1             | not classified                                                        | not classified                                                                                                                                                                              | not classified                                                                                                                                                                                                                                                                       |
| PREDICTED: hypothetical protein LOC78034                                                  | 4930528H21Rik | XP_001472376 | 9        | 1             | not classified                                                        | not classified                                                                                                                                                                              | not classified                                                                                                                                                                                                                                                                       |
| PREDICTED: hypothetical protein                                                           | EG630825      | XP_001472439 | 47       | 1             | not classified                                                        | not classified                                                                                                                                                                              | not classified                                                                                                                                                                                                                                                                       |
| PREDICTED: similar to 60S ribosomal protein L38                                           | EG633736      | XP_001472500 | 8        | 1             | not classified                                                        | not classified                                                                                                                                                                              | not classified                                                                                                                                                                                                                                                                       |
| PREDICTED: hypothetical protein LOC75255                                                  | 4930562F07Rik | XP_001472732 | 14       | 1             | not classified                                                        | not classified                                                                                                                                                                              | not classified                                                                                                                                                                                                                                                                       |
| PREDICTED: similar to Thoc7 protein                                                       | LOC100044980  | XP_001473492 | 38       | 1             | not classified                                                        | not classified                                                                                                                                                                              | not classified                                                                                                                                                                                                                                                                       |
| PREDICTED: hypothetical protein                                                           | LOC100040033  | XP_001474032 | 96       | 1             | not classified                                                        | not classified                                                                                                                                                                              | not classified                                                                                                                                                                                                                                                                       |
| PREDICTED: similar to ankyrin repeat domain 29                                            | Ankrd29       | XP_001474267 | 33       | 1             | cellular_component                                                    | molecular_function                                                                                                                                                                          | biological_process                                                                                                                                                                                                                                                                   |
| PREDICTED: similar to coronin, actin binding protein 2A                                   | LOC100045302  | XP_001474318 | 60       | 1             | not classified                                                        | not classified                                                                                                                                                                              | not classified                                                                                                                                                                                                                                                                       |
| PREDICTED: hypothetical protein                                                           | EG666372      | XP_001474538 | 19       | 1             | not classified                                                        | not classified                                                                                                                                                                              | not classified                                                                                                                                                                                                                                                                       |
| PREDICTED: similar to Sm D2 isoform 2                                                     | LOC100045392  | XP_001474690 | 13       | 1             | not classified                                                        | not classified                                                                                                                                                                              | not classified                                                                                                                                                                                                                                                                       |
| PREDICTED: similar to Kifc1 protein                                                       | LOC100044006  | XP_001474732 | 88       | 1             | not classified                                                        | not classified                                                                                                                                                                              | not classified                                                                                                                                                                                                                                                                       |

| Protein Name                                                                                                   | Gene Name     | Accession No | Mw (kDa) | Peptide Count | GO Component                                      | GO Function                                                                                                                                                                                                                                                                     | GO Process                                                                                                                                                                                                                                                                                        |
|----------------------------------------------------------------------------------------------------------------|---------------|--------------|----------|---------------|---------------------------------------------------|---------------------------------------------------------------------------------------------------------------------------------------------------------------------------------------------------------------------------------------------------------------------------------|---------------------------------------------------------------------------------------------------------------------------------------------------------------------------------------------------------------------------------------------------------------------------------------------------|
| PREDICTED: similar to ribosomal protein L37a                                                                   | LOC100045996  | XP_001474797 | 10       | 1             | not classified                                    | not classified                                                                                                                                                                                                                                                                  | not classified                                                                                                                                                                                                                                                                                    |
| PREDICTED: hypothetical protein                                                                                | LOC100040498  | XP_001474871 | 15       | 1             | not classified                                    | not classified                                                                                                                                                                                                                                                                  | not classified                                                                                                                                                                                                                                                                                    |
| PREDICTED: hypothetical protein                                                                                | LOC667147     | XP_001475011 | 30       | 1             | not classified                                    | not classified                                                                                                                                                                                                                                                                  | not classified                                                                                                                                                                                                                                                                                    |
| PREDICTED: similar to hippocampal cholinergic neurostimulating peptide precursor protein                       | LOC676548     | XP_001475026 | 11       | 1             | not classified                                    | not classified                                                                                                                                                                                                                                                                  | not classified                                                                                                                                                                                                                                                                                    |
| PREDICTED: similar to elongation factor SIII p15 subunit                                                       | LOC100045866  | XP_001475387 | 12       | 1             | not classified                                    | not classified                                                                                                                                                                                                                                                                  | not classified                                                                                                                                                                                                                                                                                    |
| PREDICTED: similar to ribosomal protein L23a                                                                   | LOC100046437  | XP_001475762 | 18       | 1             | not classified                                    | not classified                                                                                                                                                                                                                                                                  | not classified                                                                                                                                                                                                                                                                                    |
| PREDICTED: similar to Serine/arginine repetitive matrix protein 2                                              | LOC100046735  | XP_001475797 | 22       | 1             | not classified                                    | not classified                                                                                                                                                                                                                                                                  | not classified                                                                                                                                                                                                                                                                                    |
| PREDICTED: G protein-coupled receptor, family C, group 1, member B                                             | Grm2          | XP_001475864 | 93       | 1             | integral to membrane, membrane, plasma membrane   | calcium channel regulator activity, G-protein coupled receptor activity, group II metabotropic glutamate receptor activity, receptor activity, signal transducer activity                                                                                                       | G-protein coupled receptor protein signaling pathway, signal transduction, synaptic transmission                                                                                                                                                                                                  |
| PREDICTED: similar to 40S ribosomal protein S29                                                                | EG632013      | XP_001476064 | 7        | 1             | not classified                                    | not classified                                                                                                                                                                                                                                                                  | not classified                                                                                                                                                                                                                                                                                    |
| PREDICTED: similar to Nucleosome binding protein 1                                                             | LOC100046362  | XP_001476124 | 24       | 1             | not classified                                    | not classified                                                                                                                                                                                                                                                                  | not classified                                                                                                                                                                                                                                                                                    |
| PREDICTED: similar to Cngb1 protein                                                                            | Cngb1         | XP_001476248 | 147      | 1             | integral to membrane, membrane, membrane fraction | ion channel activity                                                                                                                                                                                                                                                            | ion transport, photoreceptor cell maintenance, phototransduction, transport                                                                                                                                                                                                                       |
| PREDICTED: hypothetical protein                                                                                | LOC545536     | XP_001476554 | 28       | 1             | not classified                                    | not classified                                                                                                                                                                                                                                                                  | not classified                                                                                                                                                                                                                                                                                    |
| PREDICTED: hypothetical protein                                                                                | LOC100046382  | XP_001476881 | 14       | 1             | not classified                                    | not classified                                                                                                                                                                                                                                                                  | not classified                                                                                                                                                                                                                                                                                    |
| PREDICTED: similar to sex comb on midleg-like 2 (Drosophila)                                                   | LOC100047360  | XP_001476978 | 90       | 1             | not classified                                    | not classified                                                                                                                                                                                                                                                                  | not classified                                                                                                                                                                                                                                                                                    |
| PREDICTED: hypothetical protein                                                                                | LOC100047128  | XP_001477504 | 21       | 1             | not classified                                    | not classified                                                                                                                                                                                                                                                                  | not classified                                                                                                                                                                                                                                                                                    |
| PREDICTED: hypothetical protein                                                                                | LOC100042323  | XP_001477991 | 11       | 1             | not classified                                    | not classified                                                                                                                                                                                                                                                                  | not classified                                                                                                                                                                                                                                                                                    |
| PREDICTED: similar to Sl:zC220F6.1 (novel protein similar to human dynein heavy chain (DHC))                   | Dnahc6        | XP_001478071 | 466      | 1             | not classified                                    | not classified                                                                                                                                                                                                                                                                  | not classified                                                                                                                                                                                                                                                                                    |
| PREDICTED: similar to Pro-Pol-dUTPase polyprotein; RNaseH; dUTPase; integrase; protease; reverse transcriptase | LOC100042383  | XP_001478138 | 125      | 1             | not classified                                    | not classified                                                                                                                                                                                                                                                                  | not classified                                                                                                                                                                                                                                                                                    |
| PREDICTED: hypothetical protein                                                                                | LOC100047469  | XP_001478262 | 20       | 1             | not classified                                    | not classified                                                                                                                                                                                                                                                                  | not classified                                                                                                                                                                                                                                                                                    |
| PREDICTED: hypothetical protein LOC71531                                                                       | 9030411M15Rik | XP_001478828 | 225      | 1             | integral to membrane, membrane                    | not classified                                                                                                                                                                                                                                                                  | not classified                                                                                                                                                                                                                                                                                    |
| PREDICTED: hypothetical protein                                                                                | LOC100047800  | XP_001478934 | 68       | 1             | not classified                                    | not classified                                                                                                                                                                                                                                                                  | not classified                                                                                                                                                                                                                                                                                    |
| PREDICTED: regulator of G-protein signaling like 1                                                             | Rgs11         | XP_001479114 | 127      | 1             | not classified                                    | not classified                                                                                                                                                                                                                                                                  | not classified                                                                                                                                                                                                                                                                                    |
| PREDICTED: hypothetical protein LOC71837 isoform 2                                                             | 1700003E16Rik | XP_001479836 | 56       | 1             | not classified                                    | not classified                                                                                                                                                                                                                                                                  | not classified                                                                                                                                                                                                                                                                                    |
| PREDICTED: similar to 60S ribosomal protein L9 isoform 2                                                       | LOC100048162  | XP_001480031 | 21       | 1             | not classified                                    | not classified                                                                                                                                                                                                                                                                  | not classified                                                                                                                                                                                                                                                                                    |
| PREDICTED: hypothetical protein LOC74702                                                                       | 4930517E11Rik | XP_001480083 | 22       | 1             | not classified                                    | not classified                                                                                                                                                                                                                                                                  | not classified                                                                                                                                                                                                                                                                                    |
| PREDICTED: hypothetical protein                                                                                | LOC100048073  | XP_001480112 | 80       | 1             | not classified                                    | not classified                                                                                                                                                                                                                                                                  | not classified                                                                                                                                                                                                                                                                                    |
| PREDICTED: similar to mKIAA0910 protein                                                                        | Synj1         | XP_001481337 | 189      | 1             | clathrin coat, cytoplasm, membrane coat           | hydrolase activity, inositol or phosphatidylinositol phosphatase activity, nucleic acid binding, phosphatidylinositol-4,5-bisphosphate 5-phosphatase activity, phosphoinositide 5-phosphatase activity, polyphosphoinositide phosphatase activity, protein binding, RNA binding | dephosphorylation, endocytosis, learning, neurotransmitter transport, phosphoinositide dephosphorylation, phosphoinositide metabolic process, phosphoinositide-mediated signaling, synaptic vesicle endocytosis, synaptic vesicle priming, synaptic vesicle transport, synaptic vesicle uncoating |
| PREDICTED: gene model 969, (NCBI)                                                                              | Gm969         | XP_001481372 | 103      | 1             | not classified                                    | not classified                                                                                                                                                                                                                                                                  | not classified                                                                                                                                                                                                                                                                                    |
| PREDICTED: flavin-containing monooxygenase 13                                                                  | EG226601      | XP_136366    | 66       | 1             | not classified                                    | not classified                                                                                                                                                                                                                                                                  | not classified                                                                                                                                                                                                                                                                                    |
| PREDICTED: hypothetical protein LOC72805                                                                       | 2810455K09Rik | XP_138271    | 91       | 1             | not classified                                    | not classified                                                                                                                                                                                                                                                                  | not classified                                                                                                                                                                                                                                                                                    |
| PREDICTED: hypothetical protein                                                                                | Gm659         | XP_195466    | 35       | 1             | not classified                                    | not classified                                                                                                                                                                                                                                                                  | not classified                                                                                                                                                                                                                                                                                    |
| PREDICTED: hypothetical protein LOC329739                                                                      | B430201A12Rik | XP_283903    | 50       | 1             | not classified                                    | not classified                                                                                                                                                                                                                                                                  | not classified                                                                                                                                                                                                                                                                                    |
| PREDICTED: hypothetical protein                                                                                | Gm1693        | XP_358673    | 17       | 1             | not classified                                    | not classified                                                                                                                                                                                                                                                                  | not classified                                                                                                                                                                                                                                                                                    |

| Protein Name                                                                                                                            | Gene Name      | Accession No | Mw (kDa) | Peptide Count | GO Component                                                  | GO Function                                                                                    | GO Process                                                                                                                                                              |
|-----------------------------------------------------------------------------------------------------------------------------------------|----------------|--------------|----------|---------------|---------------------------------------------------------------|------------------------------------------------------------------------------------------------|-------------------------------------------------------------------------------------------------------------------------------------------------------------------------|
| PREDICTED: similar to ribosomal protein L27A                                                                                            | EG432798       | XP_484309    | 17       | 1             | not classified                                                | not classified                                                                                 | not classified                                                                                                                                                          |
| PREDICTED: similar to Chain C, Structure Of A Hif-1a-Pvhl-Elonginb-Elonginc Complex                                                     | EG620071       | XP_889554    | 11       | 1             | not classified                                                | not classified                                                                                 | not classified                                                                                                                                                          |
| PREDICTED: similar to RIKEN cDNA 1110020P15 gene                                                                                        | EG622178       | XP_891680    | 7        | 1             | not classified                                                | not classified                                                                                 | not classified                                                                                                                                                          |
| PREDICTED: similar to Ribosomal protein S11                                                                                             | EG623114       | XP_892646    | 14       | 1             | not classified                                                | not classified                                                                                 | not classified                                                                                                                                                          |
| PREDICTED: similar to TLK2 protein                                                                                                      | LOC627701      | XP_897493    | 29       | 1             | not classified                                                | not classified                                                                                 | not classified                                                                                                                                                          |
| PREDICTED: similar to QM protein                                                                                                        | EG625219       | XP_899042    | 24       | 1             | not classified                                                | not classified                                                                                 | not classified                                                                                                                                                          |
| PREDICTED: hypothetical protein LOC74307                                                                                                | 1700092M07 Rik | XP_902879    | 10       | 1             | not classified                                                | not classified                                                                                 | not classified                                                                                                                                                          |
| PREDICTED: hypothetical protein isoform 2                                                                                               | Gm70           | XP_903922    | 47       | 1             | not classified                                                | not classified                                                                                 | not classified                                                                                                                                                          |
| PREDICTED: hypothetical protein LOC75173                                                                                                | 4930544O15 Rik | XP_909948    | 23       | 1             | integral to membrane, membrane                                | not classified                                                                                 | not classified                                                                                                                                                          |
| PREDICTED: hypothetical protein LOC73324 isoform 4                                                                                      | 1700034F02 Rik | XP_909961    | 69       | 1             | not classified                                                | not classified                                                                                 | not classified                                                                                                                                                          |
| PREDICTED: X-ray radiation resistance associated 1                                                                                      | Xrra1          | XP_910416    | 88       | 1             | cytoplasm, nucleus                                            | protein binding                                                                                | not classified                                                                                                                                                          |
| PREDICTED: similar to Proteasome (prosome, macropain) 26S subunit, non-ATPase, 2 isoform 3                                              | EG432448       | XP_911613    | 94       | 1             | not classified                                                | not classified                                                                                 | not classified                                                                                                                                                          |
| PREDICTED: hypothetical protein                                                                                                         | Lrrc37a        | XP_911630    | 376      | 1             | not classified                                                | not classified                                                                                 | not classified                                                                                                                                                          |
| PREDICTED: similar to Iron-sulfur cluster assembly 2 homolog, mitochondrial precursor (HESB-like domain-containing protein 1) isoform 5 | Isca2          | XP_913323    | 17       | 1             | mitochondrion                                                 | iron ion binding, iron-sulfur cluster binding, metal ion binding, structural molecule activity | iron-sulfur cluster assembly                                                                                                                                            |
| PREDICTED: similar to Regulator of G-protein signalling 22                                                                              | LOC635821      | XP_916087    | 129      | 1             | not classified                                                | not classified                                                                                 | not classified                                                                                                                                                          |
| PREDICTED: hypothetical protein LOC75718                                                                                                | 4931403E03 Rik | XP_919694    | 134      | 1             | extracellular region                                          | not classified                                                                                 | not classified                                                                                                                                                          |
| PREDICTED: hypothetical protein LOC219189                                                                                               | 1300010F03 Rik | XP_920456    | 213      | 1             | extracellular region, mitochondrion                           | ATP binding, ATPase activity, nucleoside-triphosphatase activity, nucleotide binding           | not classified                                                                                                                                                          |
| PREDICTED: similar to ribosomal protein S17                                                                                             | EG623169       | XP_920905    | 16       | 1             | not classified                                                | not classified                                                                                 | not classified                                                                                                                                                          |
| PREDICTED: similar to putative pheromone receptor                                                                                       | LOC639943      | XP_921678    | 59       | 1             | not classified                                                | not classified                                                                                 | not classified                                                                                                                                                          |
| PREDICTED: proline-rich polypeptide 6 isoform 4                                                                                         | Prr6           | XP_921840    | 28       | 1             | nucleus, spindle midzone                                      | carbon-sulfur lyase activity                                                                   | cell cycle, cell division, centromeric heterochromatin formation, metabolic process, mitosis, positive regulation of cytokinesis, regulation of chromosome organization |
| PREDICTED: similar to Chain C, Structure Of The Human Exon Junction Complex With A Trapped Dead-Box Helicase Bound To Rna               | LOC641170      | XP_923606    | 47       | 1             | not classified                                                | not classified                                                                                 | not classified                                                                                                                                                          |
| PREDICTED: similar to preserine protease                                                                                                | LOC641199      | XP_923637    | 18       | 1             | not classified                                                | not classified                                                                                 | not classified                                                                                                                                                          |
| PREDICTED: similar to Fkbp15 protein                                                                                                    | Fkbp15         | XP_987350    | 142      | 1             | actin filament, axon, cell projection, cytoplasm, growth cone | isomerase activity, peptidyl-prolyl cis-trans isomerase activity                               | protein folding                                                                                                                                                         |
| PREDICTED: similar to endothelial monocyte-activating polypeptide                                                                       | EG665509       | XP_988080    | 11       | 1             | not classified                                                | not classified                                                                                 | not classified                                                                                                                                                          |
| PREDICTED: similar to ribosomal protein L27a-like                                                                                       | EG666648       | XP_990276    | 16       | 1             | not classified                                                | not classified                                                                                 | not classified                                                                                                                                                          |
| PREDICTED: similar to RIKEN cDNA 2610301G19 gene                                                                                        | 2610301G19 Rik | XP_990438    | 103      | 1             | not classified                                                | not classified                                                                                 | not classified                                                                                                                                                          |
| PREDICTED: hypothetical protein                                                                                                         | 4930407110Rik  | XP_991998    | 168      | 1             | not classified                                                | not classified                                                                                 | not classified                                                                                                                                                          |
| PREDICTED: similar to Rps15a protein                                                                                                    | LOC676847      | XP_998546    | 21       | 1             | not classified                                                | not classified                                                                                 | not classified                                                                                                                                                          |
